# Supplementary material for: Age-related changes in polycomb gene regulation disrupt lineage fidelity in intestinal stem cells
Source: eLife. 2021 Mar 16;10:e62250. doi: 10.7554/eLife.62250 (PMC7984841; doi:10.7554/eLife.62250)
Supplement: Supplementary file 1. — Related to Figure 1. Differential peak analysis between aged time-points (mid-age, old and geriatric) and young ISCs. Tabs separate age comparisons and significantly regulated peaks. [file elife-62250-supp1.xlsx]

## Sheet: Mid v Young
	seqnames	start	end	peak	annotation_name	symbol	logFC	P.Value	adj.P.Val
1	3R	11984549	11984842	peak_25081_Young	FBgn0037974	CG12224	-1.06886	6.0958e-09	9.30463e-05
2	3R	19407732	19408003	peak_27309_Mid	FBgn0038705	CG11626	0.683381	4.24214e-08	0.00032376
3	3R	4307671	4307940	peak_22538_Young	FBgn0027930	MP1	-0.659417	8.16208e-08	0.000362093
4	3R	11353091	11353351	peak_24875_Young	FBgn0026063	KP78b	-0.73091	9.48882e-08	0.000362093
5	3R	31777883	31778139	peak_31448_Young	FBgn0005632	faf	-0.713096	2.03631e-07	0.000621643
6	2L	2038907	2039171	peak_920_Young	FBgn0259230	lectin-22C	-0.91259	3.47237e-07	0.000883372
7	3L	1755612	1755873	peak_15236_Young	FBgn0035268	CG8001	-0.928032	7.86429e-07	0.0015106
8	2L	13385094	13385602	peak_4464_Old	FBgn0032517	CG7099	0.632134	8.09984e-07	0.0015106
9	3R	11980281	11980541	peak_25080_Young	FBgn0037973	CG18547	-0.721357	8.90681e-07	0.0015106
10	3R	13182280	13182775	peak_25425_Young	FBgn0038122	CG8138	0.829403	1.16677e-06	0.00178096
12	X	12031712	12031961	peak_35865_Young	FBgn0030369	Cyp318a1	-0.968908	1.51747e-06	0.0021057
11	2R	24342611	24342882	peak_14163_Young	FBgn0004101	bs	-0.885529	1.69428e-06	0.00215512
13	2L	7203594	7203932	peak_2629_Mid	FBgn0031896	CG4502	0.568109	3.42378e-06	0.00402004
14	2L	827732	827994	peak_464_Young	FBgn0031286	CG3862	-0.673785	3.86133e-06	0.00403662
15	2L	22577676	22578167	peak_7192_Mid	FBgn0040011	Slmap	0.782387	3.96681e-06	0.00403662
16	2R	22926374	22926634	peak_13586_Young	FBgn0010660	Nup214	-0.684369	4.52277e-06	0.00427803
17	3R	17394993	17395246	peak_26721_Mid	FBgn0025456	CREG	0.740696	4.76458e-06	0.00427803
18	3R	7886629	7886891	peak_23813_Young	FBgn0037526	CG10092	0.571619	6.33176e-06	0.00536933
19	2R	20698292	20698547	peak_12725_Mid	FBgn0040726	dpr	0.694466	7.05109e-06	0.00566462
20	2L	3914783	3915322	peak_1519_Young	FBgn0051773	CG31773	0.461786	1.10306e-05	0.00841857
21	2L	8528966	8529226	peak_3080_Young	FBgn0028394	CG17834	-0.557218	1.35649e-05	0.00965922
22	2L	1944585	1944860	peak_874_Mid	FBgn0040719	CG15357	0.698353	1.46853e-05	0.00965922
23	X	1692657	1692916	peak_32646_Mid	FBgn0029588	CG14798	0.590476	1.49939e-05	0.00965922
24	3L	17421383	17421646	peak_20125_Young	FBgn0027660	blot	-0.619674	1.51875e-05	0.00965922
25	X	2468820	2469075	peak_33001_Young	FBgn0040388	boi	-0.655663	2.11229e-05	0.0128968
26	3R	4387040	4387299	peak_22567_Mid	FBgn0003882	tub	0.675437	2.26386e-05	0.0129431
27	2R	17598103	17598558	peak_11733_Young	FBgn0264541	CG43920	-0.699634	2.28946e-05	0.0129431
28	2R	15147709	15147967	peak_10904_Young	FBgn0033994	CG7544	0.518441	2.54e-05	0.0134934
29	X	18634787	18635046	peak_37772_Young	FBgn0030941	wgn	-0.555797	2.5636e-05	0.0134934
30	2L	412807	413078	peak_281_Young	FBgn0263933	ebi	-0.705144	2.69797e-05	0.0136109
31	2L	413407	413678	peak_282_Young	FBgn0263933	ebi	-0.735495	2.76427e-05	0.0136109
34	X	6986809	6987058	peak_34330_Old	FBgn0261284	bou	0.727884	3.18436e-05	0.0151894
32	3L	16359714	16359973	peak_19775_Young	FBgn0266417	CG45057	-0.564955	3.56839e-05	0.0160924
33	3R	19648693	19648946	peak_27382_Mid	FBgn0051220	CG31220	0.555483	3.58452e-05	0.0160924
35	2R	5608878	5609196	peak_7534_VeryOld	FBgn0039970	CG17508	0.446479	3.76883e-05	0.0164364
36	X	6986405	6986707	peak_34329_Mid	FBgn0261284	bou	0.629617	4.33143e-05	0.0183653
38	3L	9423159	9423408	peak_17680_Young	FBgn0023129	aay	-0.832812	5.13746e-05	0.0206364
39	2R	23551717	23551968	peak_13826_Young	FBgn0010501	Dcp-1	-0.797023	5.07736e-05	0.0206364
37	2R	17162010	17162281	peak_11577_Young	FBgn0050457	CG30457	0.657711	5.29063e-05	0.0207067
40	3L	1336604	1337119	peak_15077_Young	FBgn0035211	CG2211	-0.579896	5.79482e-05	0.0215737
44	3R	3734065	3734324	peak_22447_Mid	FBgn0263977	Tim17b	0.957055	5.67927e-05	0.0215737
41	3R	12960354	12960641	peak_25347_Young	FBgn0087021	Spc25	-0.576004	6.40931e-05	0.0232933
42	2L	3771595	3771904	peak_1479_Young	FBgn0004893	bowl	-0.585784	6.64964e-05	0.0233093
43	3R	3586272	3586806	peak_22430_Mid	FBgn0010247	Parp	0.538866	6.87186e-05	0.0233093
45	2L	13128964	13129364	peak_4384_Young	FBgn0032471	CG5122	-0.617734	6.76069e-05	0.0233093
46	X	11985040	11985313	peak_35843_Young	FBgn0263111	cac	0.497252	8.33924e-05	0.0276718
47	2L	6090389	6090654	peak_2230_Young	FBgn0266445	CG45075	-0.653732	8.74645e-05	0.0284055
48	3R	26440458	26440756	peak_29529_Young	FBgn0263118	tx	-0.587481	9.46703e-05	0.0301052
49	3R	18399092	18399360	peak_26995_Young	FBgn0028670	Vha100-2	-0.51853	0.000101159	0.0311979
50	3L	18800275	18800548	peak_20534_Young	FBgn0001078	ftz-f1	-0.441848	0.000102194	0.0311979
51	2L	17497169	17497431	peak_5711_Mid	FBgn0003187	qua	0.64597	0.000113801	0.0319179
52	3R	8286980	8287261	peak_23936_Mid	FBgn0037562	CG11671	0.468324	0.000114652	0.0319179
53	3R	29780668	29780932	peak_30676_Young	FBgn0039694	fig	-0.753794	0.000114562	0.0319179
54	2R	10357498	10357772	peak_9414_Mid	FBgn0033512	CG12902	0.550845	0.000118642	0.0319179
55	2L	22018874	22019126	peak_7109_Young	FBgn0028979	tio	-0.487761	0.000117092	0.0319179
56	2L	1989480	1989741	peak_898_Young	FBgn0001125	Got2	0.459128	0.00011919	0.0319179
57	2R	23712713	23712983	peak_13888_Young	FBgn0034897	Sesn	-0.404079	0.00011831	0.0319179
58	3L	9373541	9373794	peak_17658_Young	FBgn0001228	Hsp67Bb	-0.517919	0.00012905	0.0326127
59	3R	14029003	14029273	peak_25656_Young	FBgn0038194	Cyp6d5	-0.737441	0.000134389	0.0326127
60	X	13303915	13304176	peak_36155_Young	FBgn0266375	IP3K2	-0.510009	0.000135133	0.0326127
61	2L	3771977	3772226	peak_1480_Young	FBgn0004893	bowl	-0.613153	0.000134383	0.0326127
62	X	13994992	13995265	peak_36376_Young	FBgn0000173	ben	-0.573639	0.00013854	0.0326127
63	2L	17260668	17260927	peak_5634_Mid	FBgn0032629	beat-IIIc	0.576392	0.000138877	0.0326127
64	2L	20066224	20066764	peak_6517_Mid	FBgn0045064	bwa	0.465427	0.000138867	0.0326127
69	X	9030340	9030599	peak_34874_Young	FBgn0259734	CG42388	-0.756993	0.000129482	0.0326127
65	3L	1882926	1883198	peak_15265_Young	FBgn0035287	CG13937	-0.616861	0.000146083	0.0335722
66	3R	27946790	27947073	peak_30039_Young	FBgn0039562	Gp93	-0.56939	0.000148319	0.0335722
72	3R	5565749	5566015	peak_23064_Young	FBgn0037341	CG12746	-0.761533	0.000149562	0.0335722
67	3R	11993248	11993511	peak_25090_Young	FBgn0260745	mfas	-0.635059	0.000156244	0.0341958
68	3R	8477609	8477864	peak_24005_Young	FBgn0266801	CG45263	0.460047	0.00015682	0.0341958
70	2R	7418541	7418797	peak_8250_Young	FBgn0003460	so	-0.425824	0.000161384	0.034694
71	3R	4810013	4810270	peak_22746_Young	FBgn0037279	CG1129	-0.589698	0.000164775	0.034694
73	3R	31617850	31618108	peak_31375_Young	FBgn0039861	pasha	0.50376	0.000168197	0.034694
74	X	9576497	9576763	peak_35047_Young	FBgn0259741	CG42395	-0.615161	0.000167978	0.034694
75	2L	20869993	20870258	peak_6756_Mid	FBgn0032900	CG14401	0.49864	0.000175773	0.0352721
77	2L	22169365	22169622	peak_7148_Old	FBgn0032979	Clamp	0.68655	0.000177932	0.0352721
84	X	9202253	9202502	peak_34942_Young	FBgn0086450	su(r)	-0.805663	0.000173463	0.0352721
76	2L	18185580	18185835	peak_5876_Young	FBgn0267486	Ptp36E	0.449938	0.000181336	0.035486
78	X	20690539	20690797	peak_38512_Old	FBgn0003300	run	0.539714	0.000187733	0.0360925
79	2L	17127528	17127794	peak_5610_Young	FBgn0051784	CG31784	0.516211	0.000189164	0.0360925
80	4	396170	396441	peak_31686_Young	FBgn0262636	Lin29	-0.452904	0.000205442	0.0371568
81	X	6805531	6805784	peak_34278_Young	FBgn0259228	C3G	-0.646856	0.000206914	0.0371568
82	2R	25177607	25177887	peak_14516_Mid	FBgn0004181	Peb	0.462876	0.000203578	0.0371568
83	X	6987151	6987412	peak_34331_Mid	FBgn0261284	bou	0.753403	0.000197502	0.0371568
85	2L	21379949	21380209	peak_6955_Young	FBgn0032946	nrv3	0.471659	0.000204996	0.0371568
86	X	1026599	1026856	peak_32296_Young	FBgn0040337	CG3021	0.430154	0.000219989	0.0390454
87	3L	1882630	1882881	peak_15264_Young	FBgn0035287	CG13937	-0.57129	0.000230114	0.0397179
88	3L	5655765	5656037	peak_16487_Young	FBgn0085447	sif	-0.417519	0.00022811	0.0397179
89	3R	31038359	31038633	peak_31146_Young	FBgn0010015	CanA1	-0.62983	0.000231584	0.0397179
91	3R	7548299	7548555	peak_23735_Young	FBgn0015568	alpha-Est1	-0.577717	0.000244061	0.0413927
90	X	12074532	12074975	peak_35874_Mid	FBgn0030373	CG12721	0.542921	0.00025069	0.0420499
93	3R	31462647	31463349	peak_31314_Young	FBgn0039850	CG11333	0.390922	0.000262234	0.043508
92	2R	14212850	14213116	peak_10603_Young	FBgn0005613	Sox15	-0.539528	0.000277228	0.0455012
95	3R	26714085	26714635	peak_29641_Young	FBgn0023179	amon	0.553662	0.000288333	0.0468204
94	3R	25851207	25851464	peak_29378_Young	FBgn0039379	CG5886	0.424208	0.000293007	0.0470785
96	4	796739	797220	peak_31831_Mid	FBgn0039939	CG11231	0.722988	0.000303447	0.0482481
97	2L	12823928	12824191	peak_4294_Mid	FBgn0015399	kek1	0.56163	0.000315475	0.0491368
98	2L	21053257	21053521	peak_6847_Mid	FBgn0010395	Itgbetanu	0.447724	0.000314991	0.0491368
99	3R	27698844	27699112	peak_29969_Young	FBgn0045862	btz	-0.506434	0.000329025	0.0507297
101	2R	18972815	18973323	peak_12148_Young	FBgn0267351	Topors	0.380345	0.000339508	0.0518226
100	2L	8416849	8417110	peak_3030_Young	FBgn0032042	CG13398	0.456015	0.000346572	0.0523769
103	3R	18398456	18398720	peak_26994_Young	FBgn0028670	Vha100-2	-0.475939	0.000350481	0.0524485
102	X	11925086	11925344	peak_35833_Young	FBgn0030357	Sclp	-0.434346	0.000363559	0.0533263
104	2L	18184580	18184847	peak_5875_Mid	FBgn0267486	Ptp36E	0.574112	0.000369184	0.0533263
105	X	16683485	16683745	peak_37164_Young	FBgn0000152	Axs	-0.602833	0.000367993	0.0533263
106	2L	6663792	6664049	peak_2440_VeryOld	FBgn0000392	cup	0.56928	0.000370321	0.0533263
107	3L	5136210	5136468	peak_16371_Mid	FBgn0035591	CG4611	0.473716	0.000378992	0.0540138
108	2L	4004746	4005012	peak_1547_Young	FBgn0031579	CG15422	-0.487503	0.000389575	0.0540138
109	X	18813086	18813336	peak_37842_Mid	FBgn0259927	CG42450	0.56575	0.000390831	0.0540138
110	2L	2872727	2872989	peak_1158_Young	FBgn0031478	CG8814	-0.609796	0.000399597	0.0540138
111	3L	10769914	10770311	peak_18048_Young	FBgn0262890	CG43245	-0.513363	0.00039524	0.0540138
119	2R	7146928	7147177	peak_8139_Young	FBgn0024294	Spn43Aa	-0.766303	0.000399866	0.0540138
131	3L	27135398	27135647	peak_22353_Mid	FBgn0260987	vtd	0.787525	0.000392906	0.0540138
112	3L	15715872	15716152	peak_19544_Young	FBgn0260776	CG42570	-0.776683	0.000418014	0.0541719
113	3L	17485956	17486229	peak_20144_Young	FBgn0036732	Oatp74D	-0.469028	0.000419602	0.0541719
114	X	17245226	17245705	peak_37346_Mid	FBgn0030833	CG8915	0.568104	0.000422331	0.0541719
115	X	21045446	21045700	peak_38605_Young	FBgn0031148	Cbs	-0.457511	0.000418742	0.0541719
116	2R	1263639	1263915	peak_7291_Mid	FBgn0058191	CG40191	0.716154	0.000407221	0.0541719
117	3R	19906088	19906349	peak_27482_Young	FBgn0038747	RhoGAP92B	-0.390202	0.000408145	0.0541719
118	2R	13500392	13500658	peak_10365_Young	FBgn0033845	mars	-0.572515	0.000439911	0.0559567
132	3L	9493974	9494402	peak_17717_Young	FBgn0052037	CG32037	-0.785607	0.000445402	0.056187
120	3R	22369016	22369269	peak_28257_Young	FBgn0038951	CG5380	-0.440675	0.000458626	0.0567803
121	3R	8317415	8317691	peak_23949_Young	FBgn0062412	Ctr1B	-0.610195	0.000467905	0.0567803
122	2R	6740631	6740891	peak_7956_Mid	FBgn0028579	phtf	0.713483	0.0004786	0.0567803
123	3L	15976860	15977126	peak_19613_Young	FBgn0036551	CG17029	-0.477947	0.000487792	0.0567803
124	2L	4476967	4477251	peak_1698_Young	FBgn0011603	ine	-0.411493	0.000468317	0.0567803
125	3R	31749187	31749443	peak_31431_Mid	FBgn0261479	nero	0.444907	0.000484117	0.0567803
126	2R	14993473	14993991	peak_10860_Young	FBgn0033989	CG7639	0.434291	0.000486182	0.0567803
127	3R	17394537	17394790	peak_26720_Young	FBgn0025456	CREG	0.483303	0.00049217	0.0567803
129	3R	27253778	27254292	peak_29816_Young	FBgn0010441	pll	-0.413753	0.000484513	0.0567803
130	3R	8287726	8287984	peak_23938_Young	FBgn0037562	CG11671	0.410916	0.00049259	0.0567803
134	X	10070714	10070975	peak_35202_Mid	FBgn0030174	CG15312	0.684939	0.000494744	0.0567803
135	2L	2037538	2037789	peak_917_Young	FBgn0003557	Su(dx)	0.353424	0.000492518	0.0567803
133	3R	21246650	21246905	peak_27910_Young	FBgn0038874	ETHR	-0.43221	0.000501696	0.0571485
128	2R	11397328	11397586	peak_9743_Young	FBgn0082585	sprt	-0.571542	0.000508827	0.0575314
136	X	7285434	7285693	peak_34392_Young	FBgn0029942	CG2059	-0.467925	0.000542338	0.0608694
137	2L	10543225	10543492	peak_3720_Young	FBgn0051721	Trim9	-0.618314	0.000558786	0.0622577
139	2L	22538098	22538359	peak_7186_Young	FBgn0064225	RpL5	0.42493	0.000568006	0.0628264
138	3L	6038602	6038871	peak_16592_Young	FBgn0250815	Jon65Aiv	-0.638148	0.000573672	0.0629534
144	2L	2955711	2956214	peak_1195_Young	FBgn0010263	Rbp9	0.382776	0.000577403	0.0629534
140	X	3869089	3869354	peak_33461_Young	FBgn0028491	CG2930	-0.50778	0.000582176	0.0630236
142	X	18857407	18857672	peak_37864_Young	FBgn0030969	CG7288	-0.407083	0.000589517	0.063369
141	2L	20733710	20734016	peak_6692_Young	FBgn0262743	Fs(2)Ket	-0.470842	0.000609049	0.0646109
146	2R	14964527	14964799	peak_10844_Young	FBgn0261854	aPKC	-0.380627	0.000609536	0.0646109
147	2R	23042973	23043242	peak_13621_Young	FBgn0261705	CG42741	-0.3663	0.000624994	0.0657925
145	3L	8835051	8835307	peak_17523_Young	FBgn0052026	CG32026	-0.52404	0.000638583	0.0667625
143	3R	16327595	16328133	peak_26452_Young	FBgn0038416	CG17930	-0.525152	0.00065476	0.0674459
148	3R	11992633	11993112	peak_25089_Young	FBgn0260745	mfas	-0.586512	0.000658376	0.0674459
152	3L	10202571	10202829	peak_17928_Young	FBgn0000451	ect	0.358898	0.000658351	0.0674459
156	2L	2804724	2804989	peak_1130_Young	FBgn0031461	daw	0.327026	0.000669476	0.0681259
149	3L	17531494	17531750	peak_20165_Young	FBgn0036735	Edc3	-0.718499	0.000684725	0.0687608
155	X	686680	686933	peak_32150_Young	FBgn0021764	sdk	0.326551	0.000680322	0.0687608
153	2L	19423932	19424190	peak_6322_Young	FBgn0032779	CG16771	-0.35287	0.000711569	0.0709895
150	X	8081634	8081919	peak_34620_Young	FBgn0029994	CG2254	-0.604541	0.000717613	0.0711276
151	3L	6261435	6261729	peak_16668_Young	FBgn0001258	ImpL3	-0.512202	0.000731381	0.0720245
159	2R	9094593	9094842	peak_8936_Young	FBgn0033373	CG8080	-0.71336	0.000742054	0.0726071
158	X	5312020	5312280	peak_33842_Young	FBgn0011761	dhd	0.384727	0.000755303	0.0734328
157	2R	17099132	17099433	peak_11548_Young	FBgn0050456	CG30456	-0.541201	0.000781265	0.0754761
154	2R	21631849	21632099	peak_13070_Young	FBgn0034642	CG15674	-0.586927	0.000788738	0.0757188
160	X	8459308	8459589	peak_34730_Young	FBgn0023506	Es2	-0.498232	0.000817398	0.0779798
179	3L	12861573	12861822	peak_18727_Mid	FBgn0052107	CG32107	0.749754	0.000827165	0.0784214
172	2L	743539	743792	peak_430_Young	FBgn0026438	Eaat2	0.371635	0.000837959	0.0789543
163	2R	17120246	17120503	peak_11558_Young	FBgn0000079	Amy-p	-0.516756	0.000856222	0.0798969
164	X	8690140	8690396	peak_34811_Young	FBgn0027864	Ogg1	0.404795	0.000858431	0.0798969
161	2R	24186827	24187098	peak_14092_Mid	FBgn0266083	ocm	0.49748	0.000879916	0.0806426
162	3L	3892516	3892795	peak_15976_Mid	FBgn0026592	Fie	0.570917	0.000882817	0.0806426
165	2R	24046301	24046648	peak_14027_Young	FBgn0003353	sei	-0.409552	0.000880327	0.0806426
169	2L	3044789	3045242	peak_1234_Young	FBgn0042627	v(2)k05816	-0.423618	0.000887576	0.0806426
166	3R	6741611	6741871	peak_23515_Young	FBgn0051481	pb	-0.414459	0.000907611	0.0814928
205	2L	18308528	18308777	peak_5903_Young	FBgn0263086	CG43354	-0.913364	0.00090241	0.0814928
177	2L	7401533	7401792	peak_2680_Young	FBgn0031907	CG5171	-0.692785	0.000924222	0.082499
167	3L	8185538	8185787	peak_17282_Young	FBgn0035849	ERR	-0.593067	0.000941067	0.082556
170	2L	16889113	16889373	peak_5570_Young	FBgn0260758	CG42556	-0.487377	0.000941086	0.082556
175	2L	7402227	7402476	peak_2682_Young	FBgn0031907	CG5171	-0.709514	0.000938678	0.082556
176	3R	7886931	7887184	peak_23814_Young	FBgn0037526	CG10092	0.358054	0.000946934	0.0825943
168	4	396507	396769	peak_31687_Young	FBgn0262636	Lin29	-0.476523	0.000959172	0.0828736
173	X	9662837	9663096	peak_35097_Young	FBgn0030148	CG3106	-0.589884	0.000962464	0.0828736
174	2L	3706954	3707214	peak_1446_Young	FBgn0051777	CG31777	0.427375	0.000966424	0.0828736
171	3R	5571818	5572089	peak_23068_Young	FBgn0023023	CRMP	-0.564154	0.000975251	0.0831633
186	2L	4119213	4119657	peak_1580_Young	FBgn0020376	Sr-CIII	0.402574	0.000987615	0.0832871
195	2L	15484063	15484346	peak_5165_Young	FBgn0020371	Tim17b2	0.317749	0.000984603	0.0832871
178	3R	29257027	29257292	peak_30527_Young	FBgn0267104	CG45544	-0.50768	0.0010217	0.0853295
183	3R	27112144	27112395	peak_29777_Young	FBgn0039487	gb	0.37098	0.00102861	0.0853295
188	3R	19212834	19213229	peak_27251_Young	FBgn0025680	cry	-0.332999	0.00102346	0.0853295
180	2R	24616061	24616324	peak_14289_Young	FBgn0035040	CG4741	0.419053	0.0010412	0.0859076
193	3L	4825653	4825905	peak_16288_Young	FBgn0261797	Dhc64C	0.359338	0.00106473	0.0873765
181	3L	1882079	1882357	peak_15263_Young	FBgn0035287	CG13937	-0.519988	0.00108985	0.0880918
182	3R	7966521	7966791	peak_23842_Young	FBgn0000504	dsx	-0.521096	0.00109076	0.0880918
185	3L	16957201	16957464	peak_20003_Young	FBgn0036680	Cpr73D	-0.475982	0.00108743	0.0880918
184	2L	21656733	21656998	peak_6990_VeryOld	FBgn0032956	Cul2	0.568518	0.0011182	0.0889607
189	2L	11155640	11155902	peak_3882_Young	FBgn0032350	CG6287	-0.44535	0.001119	0.0889607
190	2L	4444581	4444832	peak_1683_Young	FBgn0031604	Elp3	0.353755	0.00111339	0.0889607
187	2R	11529527	11529790	peak_9776_Young	FBgn0000577	en	-0.435077	0.00113511	0.0897733
194	2L	20494486	20494754	peak_6627_Young	FBgn0054007	CG34007	-0.37606	0.00116821	0.0915772
196	2L	6494445	6494711	peak_2390_Young	FBgn0031824	CG9547	-0.35761	0.00116991	0.0915772
198	2R	25127999	25128282	peak_14499_Young	FBgn0050430	CG30430	0.434934	0.0011872	0.0924565
191	2R	13546368	13546639	peak_10378_Mid	FBgn0033853	CG6145	0.475441	0.00120784	0.0931135
202	3R	30902595	30903106	peak_31104_Young	FBgn0053483	CG33483	-0.333252	0.00120624	0.0931135
192	3L	10226034	10226314	peak_17941_Mid	FBgn0052056	scramb1	0.506326	0.00122582	0.0940245
199	3L	1569624	1569876	peak_15158_Young	FBgn0035236	CG12004	-0.487344	0.001245	0.0949358
207	2R	10899002	10899262	peak_9601_Young	FBgn0033570	CG7712	0.32673	0.00125014	0.0949358
214	3R	19935550	19935813	peak_27501_Young	FBgn0021776	mira	0.315448	0.00126262	0.0954094
197	2R	21296559	21296829	peak_12942_Young	FBgn0261554	CG42672	-0.535447	0.00128415	0.0965582
200	2R	8121282	8121541	peak_8542_Young	FBgn0033264	Nup50	-0.610316	0.00133585	0.0975619
203	2R	18157633	18157893	peak_11893_Young	FBgn0022238	lolal	-0.5006	0.00131855	0.0975619
208	3L	17495792	17496048	peak_20148_Young	FBgn0052185	edin	-0.346031	0.0013234	0.0975619
210	2R	15009688	15009962	peak_10865_Young	FBgn0029082	hbs	0.352578	0.00132966	0.0975619
212	3L	14756854	14757135	peak_19238_Mid	FBgn0260233	CG42507	0.347197	0.00133345	0.0975619
224	3R	4236114	4236363	peak_22503_Young	FBgn0010225	Gel	-0.836341	0.00132161	0.0975619
204	3R	10109513	10109767	peak_24556_Young	FBgn0028734	Fmr1	-0.379709	0.0013484	0.0980095
201	X	2251481	2251962	peak_32895_Mid	FBgn0000377	crn	0.474249	0.00135541	0.0980523
245	X	149709	149958	peak_31972_Young	FBgn0025835	CG17707	-0.973876	0.00138034	0.0993844
209	3R	9516778	9517058	peak_24343_Young	FBgn0037702	CG8176	-0.470726	0.00140531	0.100707
217	3L	11065884	11066139	peak_18167_Young	FBgn0025355	SuUR	-0.394835	0.00141714	0.10108
206	X	8490364	8490624	peak_34743_Mid	FBgn0003023	otu	0.45993	0.00142636	0.101265
211	2R	24688172	24688421	peak_14311_Mid	FBgn0035049	Mmp1	0.432564	0.00143902	0.101691
213	3R	31812754	31813009	peak_31464_Mid	FBgn0039883	RhoGAP100F	0.49214	0.00151647	0.106181
225	3R	3734738	3734992	peak_22448_Young	FBgn0263977	Tim17b	0.374065	0.00151403	0.106181
215	3R	10850074	10850355	peak_24754_Young	FBgn0259740	CG42394	-0.473081	0.00156615	0.106403
216	3L	10224178	10224435	peak_17937_Young	FBgn0052056	scramb1	-0.401147	0.00154489	0.106403
218	2R	14170923	14171173	peak_10580_Young	FBgn0033906	CG8331	-0.496117	0.00157472	0.106403
219	3L	16052747	16053010	peak_19653_Young	FBgn0005536	Mbs	-0.449968	0.00154802	0.106403
222	2R	22549409	22549683	peak_13428_Young	FBgn0034736	CG6018	-0.446543	0.00157542	0.106403
223	3R	6008169	6008436	peak_23258_Young	FBgn0003261	Rm62	0.386093	0.00153536	0.106403
226	2R	11364470	11364748	peak_9732_Mid	FBgn0033627	CG13204	0.62134	0.00156991	0.106403
234	2L	3915430	3915683	peak_1520_Young	FBgn0051773	CG31773	0.344244	0.00154642	0.106403
230	2R	16187841	16188130	peak_11257_Young	FBgn0034086	CG8441	-0.369186	0.00158992	0.10691
220	3R	9869999	9870248	peak_24457_Young	FBgn0037766	Teh1	-0.497456	0.0016329	0.109056
221	X	4130724	4131024	peak_33540_Mid	FBgn0066114	GlcAT-I	0.568613	0.0016421	0.109056
232	2R	4471467	4471721	peak_7417_Young	FBgn0260798	Gprk1	0.434045	0.00164327	0.109056
228	3R	22368580	22368850	peak_28256_Young	FBgn0038951	CG5380	-0.386307	0.00167305	0.110551
237	3R	11557399	11557893	peak_24933_Young	FBgn0037911	CG10898	0.344306	0.00169302	0.110738
239	2L	20602998	20603482	peak_6651_Young	FBgn0051677	CG31677	0.413674	0.00168336	0.110738
248	2R	15115926	15116184	peak_10891_Young	FBgn0015371	chn	0.339629	0.00169764	0.110738
227	3L	18667704	18667966	peak_20497_Young	FBgn0260027	CG42495	-0.463187	0.00175521	0.111168
229	2L	15747486	15747741	peak_5230_Young	FBgn0010382	CycE	-0.449877	0.00174987	0.111168
241	3R	23536582	23536835	peak_28621_Young	FBgn0039085	CG10170	0.359241	0.00173299	0.111168
242	3R	31194875	31195137	peak_31194_Young	FBgn0039827	CG1544	-0.391248	0.0017521	0.111168
243	2L	14273450	14273895	peak_4758_Young	FBgn0052971	CG32971	0.365855	0.00174038	0.111168
266	2L	13213699	13213948	peak_4411_Young	FBgn0032483	CG15482	-0.867839	0.00171835	0.111168
268	X	12086752	12087001	peak_35875_Young	FBgn0030374	CG15734	-0.934764	0.00175108	0.111168
233	3L	15662632	15662904	peak_19527_Young	FBgn0014850	Eig71Ej	0.463968	0.00178686	0.112241
235	X	1286226	1286496	peak_32428_Young	FBgn0025642	CG32812	0.380538	0.00178355	0.112241
231	3L	3892002	3892261	peak_15975_Mid	FBgn0026592	Fie	0.58961	0.00181478	0.112945
236	X	10365871	10366144	peak_35294_Young	FBgn0028480	CG17841	0.390167	0.00182026	0.112945
256	3R	21739892	21740162	peak_28051_Young	FBgn0038897	CG5849	0.291679	0.00181287	0.112945
238	2L	13595710	13596515	peak_4537_Young	FBgn0028513	CG9254	-0.45177	0.00186273	0.114539
246	2L	6177380	6177670	peak_2260_Mid	FBgn0085409	CG34380	0.452585	0.00186845	0.114539
260	3L	26014064	26014321	peak_22324_Young	FBgn0058178	CG40178	0.36473	0.00186683	0.114539
240	2R	7451033	7451412	peak_8266_Young	FBgn0050502	fa2h	-0.543868	0.00191863	0.116738
244	2L	16793989	16794267	peak_5535_Young	FBgn0040262	Ugt36Ba	-0.445965	0.00192728	0.116738
264	2L	3304914	3305181	peak_1321_Young	FBgn0031518	CG3277	0.299771	0.00192363	0.116738
259	2R	21537964	21538213	peak_13032_Young	FBgn0050286	CG30286	-0.754174	0.00196474	0.118536
247	2R	9130422	9130739	peak_8953_Young	FBgn0033382	Hydr1	-0.505033	0.00200366	0.120409
252	3R	25491305	25491563	peak_29285_Young	FBgn0039341	CG5112	0.36424	0.00201929	0.120872
249	2R	24603468	24603729	peak_14286_Mid	FBgn0035034	CG3565	0.439405	0.00206927	0.12338
276	3L	16278629	16278878	peak_19728_Young	FBgn0040796	CG13064	-0.774154	0.00208878	0.124059
250	X	2326657	2326929	peak_32933_Young	FBgn0040391	CG2854	-0.570612	0.00216599	0.124957
251	2R	19689942	19690495	peak_12393_Young	FBgn0040729	CG15126	-0.541548	0.00216939	0.124957
254	X	20661697	20661991	peak_38508_Young	FBgn0031127	CG1835	-0.419145	0.00211962	0.124957
255	3R	20560754	20561168	peak_27663_VeryOld	FBgn0038803	CG5191	0.393565	0.00216707	0.124957
257	3L	7969247	7969508	peak_17197_Young	FBgn0010406	RNaseX25	-0.528463	0.00216688	0.124957
262	3R	9768183	9768509	peak_24436_Young	FBgn0037747	CG8481	0.358394	0.00212194	0.124957
263	X	16967502	16967780	peak_37255_Mid	FBgn0030809	CG9086	0.383222	0.0021458	0.124957
269	2R	19881979	19882261	peak_12449_Young	FBgn0034477	CG13872	0.39592	0.00215182	0.124957
253	3L	14614197	14614474	peak_19199_Young	FBgn0003388	shd	-0.498659	0.00219199	0.125525
265	2L	1708198	1708476	peak_801_Young	FBgn0031357	mRpL48	-0.459713	0.0021957	0.125525
282	3L	14409429	14409688	peak_19141_Young	FBgn0036423	CG3919	0.311842	0.00221295	0.126039
261	2L	15964116	15964384	peak_5293_Young	FBgn0028645	beat-Ib	0.431656	0.00222236	0.126104
275	2R	4829094	4829353	peak_7466_Young	FBgn0033000	CG14464	0.340947	0.00225142	0.12728
274	2R	17140515	17140969	peak_11567_Young	FBgn0262563	CG43103	0.363852	0.00226813	0.127752
258	3L	17855680	17855957	peak_20270_Mid	FBgn0036764	CG5535	0.472929	0.00228709	0.128346
283	X	2387702	2387975	peak_32965_Young	FBgn0264598	PsGEF	0.366248	0.00234837	0.131302
267	3L	15517529	15517797	peak_19467_Young	FBgn0036503	CG13454	-0.579776	0.00242022	0.132066
270	X	19662926	19663195	peak_38180_Young	FBgn0031054	Ssu72	-0.565413	0.0024634	0.132066
271	3L	1969022	1969288	peak_15293_Young	FBgn0027547	CG1927	-0.473268	0.00245941	0.132066
273	3R	23356797	23357074	peak_28569_Young	FBgn0002622	RpS3	0.408806	0.0024116	0.132066
277	3L	7131616	7131875	peak_16927_Young	FBgn0010387	Dbi	-0.397231	0.00240966	0.132066
278	3L	16401152	16401417	peak_19788_Mid	FBgn0266099	CG44836	0.439873	0.00244668	0.132066
279	2L	22924924	22925420	peak_7209_Mid	FBgn0002566	lt	0.402219	0.00237168	0.132066
284	X	2336067	2336321	peak_32936_Young	FBgn0044047	Ilp6	-0.355742	0.00246585	0.132066
286	2R	11295200	11295460	peak_9699_Young	FBgn0040763	CG18336	-0.468675	0.00245101	0.132066
287	2R	15689672	15689939	peak_11071_Young	FBgn0050088	CG30088	0.351758	0.00244349	0.132066
289	2L	8416350	8416612	peak_3029_Young	FBgn0027932	Akap200	0.331285	0.0024436	0.132066
297	X	12784914	12785175	peak_36033_Young	FBgn0052647	CG32647	0.36382	0.00243936	0.132066
290	3R	29255734	29255999	peak_30525_Young	FBgn0267104	CG45544	-0.356692	0.00247557	0.132123
272	2L	16714503	16714856	peak_5491_Young	FBgn0086907	Cyt-c-d	-0.575756	0.00251065	0.133351
296	2R	23712269	23712531	peak_13887_Young	FBgn0034897	Sesn	-0.363679	0.00251605	0.133351
305	2L	7189814	7190076	peak_2624_Young	FBgn0031894	CG4496	0.379116	0.00253652	0.13397
307	2L	19735867	19736118	peak_6429_Young	FBgn0032816	Nf-YB	0.32846	0.0025825	0.135929
281	2R	7450726	7450986	peak_8265_Young	FBgn0050502	fa2h	-0.692972	0.00264666	0.138379
314	2L	4118891	4119145	peak_1579_Young	FBgn0020376	Sr-CIII	0.328425	0.00264719	0.138379
304	X	19665706	19665978	peak_38182_Young	FBgn0004057	Zw	-0.430536	0.00266349	0.138756
280	3R	3623501	3623775	peak_22434_Young	FBgn0086378	Alg-2	0.480546	0.0026908	0.138925
285	3L	6978882	6979136	peak_16890_Young	FBgn0001104	Galphai	-0.559496	0.00274309	0.138925
288	3R	11984880	11985170	peak_25082_Young	FBgn0037975	CG3397	-0.646356	0.0027415	0.138925
295	4	1126443	1126694	peak_31914_VeryOld	FBgn0039927	CG11155	0.622414	0.0027324	0.138925
299	3R	26104667	26104936	peak_29448_Young	FBgn0051324	CG31324	-0.361495	0.00272171	0.138925
303	2L	13802250	13802527	peak_4585_Young	FBgn0027844	CAH1	-0.372479	0.00274864	0.138925
308	2R	9693209	9693465	peak_9170_Young	FBgn0023143	Uba1	0.311304	0.00268098	0.138925
309	3L	14131708	14131963	peak_19076_Young	FBgn0042630	Sox21b	0.35853	0.00272951	0.138925
315	3R	20252615	20252867	peak_27574_Young	FBgn0262582	cic	0.325966	0.00273592	0.138925
325	2R	18109967	18110313	peak_11872_Young	FBgn0085225	CG34196	-0.842099	0.00279846	0.140976
291	3L	994753	995033	peak_14942_Mid	FBgn0035179	CG12038	0.581213	0.00284992	0.142627
317	3L	12392290	12392550	peak_18579_Young	FBgn0036279	Ncc69	-0.366426	0.00284731	0.142627
292	2R	15221476	15221758	peak_10920_Young	FBgn0001187	Hex-C	-0.684436	0.00286237	0.14268
312	2L	9397178	9397436	peak_3338_Young	FBgn0032115	CG4438	-0.771933	0.00286969	0.14268
294	3L	19292486	19292758	peak_20718_Young	FBgn0028380	fal	-0.503783	0.0028964	0.143541
293	X	13669306	13669794	peak_36253_VeryOld	FBgn0030508	CG15760	0.528322	0.00291996	0.14424
298	2L	18823406	18823663	peak_6090_Young	FBgn0032713	CG17323	-0.520477	0.00293158	0.144347
316	2R	21312917	21313441	peak_12949_Young	FBgn0034618	CG9485	-0.415021	0.00294804	0.144691
302	3R	26798192	26798443	peak_29657_Young	FBgn0262473	Tl	-0.435425	0.00299968	0.144896
306	2R	15259593	15260320	peak_10932_Young	FBgn0034005	ItgalphaPS4	-0.425235	0.0029947	0.144896
310	3L	3246476	3246743	peak_15758_Old	FBgn0263246	CG43389	0.437231	0.00298108	0.144896
322	3L	1349577	1349843	peak_15080_Young	FBgn0029514	CG9166	-0.328309	0.00299643	0.144896
354	2L	15432126	15432382	peak_5142_Young	FBgn0028892	CG4161	0.314118	0.00298506	0.144896
301	X	16944254	16944514	peak_37241_Young	FBgn0030808	RhoGAP15B	-0.50392	0.00301747	0.145295
300	2R	25255725	25256012	peak_14532_Mid	FBgn0035094	CG9380	0.566166	0.00303954	0.145898
313	2L	17129986	17130275	peak_5611_Mid	FBgn0083942	CG34106	0.707307	0.00305311	0.146089
331	3R	22580610	22580864	peak_28321_Young	FBgn0028837	CSN6	0.310034	0.00306266	0.146089
318	2R	14482150	14482439	peak_10687_Young	FBgn0001332	L	-0.41334	0.00308308	0.146605
311	2R	18179239	18179510	peak_11904_Young	FBgn0034314	nopo	-0.54766	0.0031238	0.146713
319	3R	13958641	13959187	peak_25620_Young	FBgn0016672	Ipp	0.366915	0.00309668	0.146713
334	2L	602425	602948	peak_364_Young	FBgn0031270	CG13689	0.341902	0.0031143	0.146713
336	X	686329	686578	peak_32149_Young	FBgn0021764	sdk	0.325589	0.00311595	0.146713
344	3R	27111846	27112101	peak_29776_Young	FBgn0039487	gb	0.313467	0.0031503	0.147504
333	X	14787994	14788252	peak_36549_Young	FBgn0015010	Ag5r	0.364494	0.00319362	0.147821
337	3L	9509502	9509756	peak_17726_Young	FBgn0036008	CG3408	0.318059	0.00318464	0.147821
338	2R	22700872	22701127	peak_13504_Young	FBgn0034766	Obp59a	0.342004	0.00319582	0.147821
343	2R	7011229	7011919	peak_8078_Young	FBgn0029506	Tsp42Ee	-0.365242	0.00318776	0.147821
323	X	21217933	21218250	peak_38660_Young	FBgn0052523	CG32523	-0.657842	0.00322635	0.148782
321	3L	3892980	3893281	peak_15977_Mid	FBgn0026592	Fie	0.510155	0.00326796	0.148902
324	2L	1611296	1611783	peak_775_Mid	FBgn0031351	CG14352	0.422108	0.00326157	0.148902
326	2R	12612298	12612566	peak_10093_Mid	FBgn0004435	Galphaq	0.402181	0.00325898	0.148902
332	3R	7793069	7793334	peak_23789_Young	FBgn0037518	CG2641	-0.407109	0.0032402	0.148902
350	X	19637887	19638143	peak_38170_Young	FBgn0031047	Rcd-1	-0.311992	0.00328498	0.149232
320	3L	19292854	19293103	peak_20719_Young	FBgn0028380	fal	-0.649134	0.00334093	0.151323
357	2R	18857555	18857819	peak_12119_Young	FBgn0034405	Jheh2	0.321036	0.00338415	0.152376
367	3L	15699810	15700086	peak_19538_Young	FBgn0041160	comm2	-0.303619	0.00338273	0.152376
328	2R	17484640	17484917	peak_11683_Young	FBgn0050104	NT5E-2	-0.511377	0.00341522	0.152874
361	X	2685777	2686297	peak_33084_Young	FBgn0003068	per	-0.320204	0.00341173	0.152874
369	3L	20222494	20222743	peak_21021_Young	FBgn0036953	CG17145	-0.947821	0.00343426	0.153277
327	X	8243944	8244216	peak_34678_Mid	FBgn0030026	sni	0.44024	0.0034643	0.15382
341	3R	7790680	7791132	peak_23788_Young	FBgn0037517	CG10086	-0.420735	0.00347431	0.15382
353	X	5899304	5899563	peak_33982_Young	FBgn0000042	Act5C	-0.331296	0.00348186	0.15382
391	2L	15432523	15432778	peak_5143_Young	FBgn0028892	CG4161	0.312047	0.00348675	0.15382
329	3R	4386577	4386846	peak_22566_Mid	FBgn0003882	tub	0.460749	0.00353185	0.155152
352	3R	5262138	5262409	peak_22950_Young	FBgn0037307	Tim17a2	-0.426152	0.00353726	0.155152
330	3L	12790041	12790299	peak_18694_Young	FBgn0261674	CG42709	-0.545014	0.00362688	0.156829
335	4	358873	359138	peak_31669_Young	FBgn0039904	Hcf	0.3865	0.00361182	0.156829
345	2L	3719698	3719961	peak_1454_Young	FBgn0040104	lectin-24A	0.4081	0.00358731	0.156829
366	3R	23519728	23520001	peak_28612_Young	FBgn0039081	Irk2	0.389172	0.00361781	0.156829
370	3L	1730983	1731236	peak_15226_Young	FBgn0027594	drpr	0.342867	0.00361923	0.156829
342	2R	18862491	18862749	peak_12122_Young	FBgn0262479	CG43069	-0.393142	0.00363725	0.156833
349	3R	14655319	14655571	peak_25847_Mid	FBgn0086686	l(3)L1231	0.342067	0.00365047	0.15696
371	3R	16202975	16203234	peak_26393_Young	FBgn0051287	CG31287	-0.360647	0.00369269	0.158329
339	X	6804626	6804875	peak_34277_Young	FBgn0029903	pod1	-0.482912	0.00370351	0.158348
340	3L	4188345	4188598	peak_16078_VeryOld	FBgn0003710	tipE	0.450939	0.00373973	0.15945
346	X	11925571	11925840	peak_35834_Young	FBgn0030357	Sclp	-0.388364	0.00375203	0.159529
359	3R	5670120	5670614	peak_23124_Young	FBgn0037363	Atg17	-0.40187	0.00377585	0.160096
351	2L	9949390	9949671	peak_3522_Young	FBgn0032167	CG5853	-0.472491	0.00380102	0.16022
374	2L	3655864	3656122	peak_1432_Young	FBgn0000721	for	-0.349673	0.00382127	0.16022
382	2R	24927221	24927683	peak_14412_Young	FBgn0060296	pain	-0.386423	0.00384174	0.16022
384	3L	17802181	17802438	peak_20249_Young	FBgn0052190	NUCB1	0.29772	0.0037927	0.16022
389	3R	31405099	31405357	peak_31286_Young	FBgn0261988	Gprk2	0.290749	0.00384017	0.16022
414	X	580607	580860	peak_32104_Young	FBgn0261930	vnd	0.244891	0.00382074	0.16022
385	X	7528955	7529213	peak_34444_Young	FBgn0262612	CG43138	0.40782	0.00386353	0.160689
373	X	16599805	16600069	peak_37131_Young	FBgn0061200	Nup153	-0.364482	0.00390077	0.161359
377	2L	21260984	21261237	peak_6920_Young	FBgn0021856	l(2)k14505	0.336866	0.00389348	0.161359
347	3R	23258855	23259119	peak_28533_Young	FBgn0039068	CG13827	-0.447352	0.00392419	0.161889
348	2L	11066935	11067208	peak_3859_Young	FBgn0032330	Samuel	-0.471238	0.0039512	0.162127
393	3R	10779788	10780037	peak_24734_Young	FBgn0037832	Desi	-0.788025	0.00394087	0.162127
355	3L	14613358	14613726	peak_19198_Young	FBgn0003388	shd	-0.428142	0.00398617	0.163082
392	3L	15566588	15566862	peak_19492_Young	FBgn0267390	dop	-0.346408	0.00399584	0.163082
364	3R	31233666	31233915	peak_31216_Mid	FBgn0039832	CG15563	0.622258	0.00402882	0.163642
378	2L	13205009	13205274	peak_4407_Young	FBgn0032481	CG16972	-0.396929	0.00405036	0.163642
386	2L	18670082	18670354	peak_6031_Young	FBgn0263079	CG43338	-0.373343	0.0040422	0.163642
397	2L	11842174	11842708	peak_4052_Young	FBgn0040968	CG14933	-0.31132	0.00405246	0.163642
395	3R	18659196	18659450	peak_27068_Young	FBgn0027841	CstF-64	0.306603	0.00406702	0.163797
358	3L	5785710	5785959	peak_16527_Mid	FBgn0035636	Cralbp	0.633957	0.00408025	0.163897
356	3R	26988431	26988680	peak_29742_Young	FBgn0051075	CG31075	-0.54839	0.00413254	0.164269
362	2L	8164279	8164556	peak_2942_Young	FBgn0031992	CG8498	-0.466865	0.00412024	0.164269
365	3R	4162152	4162411	peak_22480_Young	FBgn0058198	CG40198	-0.420284	0.00412249	0.164269
394	3R	13812834	13813094	peak_25599_Young	FBgn0259730	tal-1A	-0.345587	0.00411943	0.164269
363	2R	22808827	22809104	peak_13538_Young	FBgn0086408	stl	0.407031	0.00414334	0.16427
390	3R	8523680	8523942	peak_24011_Young	FBgn0051259	CG31259	-0.355547	0.00416623	0.16475
368	3L	9615077	9615372	peak_17745_Young	FBgn0267348	LanB2	-0.422015	0.00421014	0.165642
383	3R	16991792	16992053	peak_26597_Young	FBgn0038461	CG3678	0.365364	0.0042105	0.165642
360	X	7946749	7946998	peak_34576_Young	FBgn0027280	l(1)G0193	-0.555545	0.0042353	0.166189
431	3R	17147494	17147764	peak_26668_Young	FBgn0264291	Det	0.278419	0.00424747	0.166239
402	2L	6610831	6611099	peak_2417_Young	FBgn0031836	CG11050	0.299781	0.0042662	0.16634
413	2L	3606534	3606804	peak_1411_Young	FBgn0002985	odd	0.29684	0.00427184	0.16634
372	X	1941751	1942009	peak_32751_Young	FBgn0264562	Hr4	-0.510265	0.00433744	0.168465
396	3R	16051311	16051605	peak_26321_Young	FBgn0027948	msps	-0.342651	0.00435183	0.168595
379	X	18849305	18849556	peak_37863_Young	FBgn0030966	CG7280	-0.695051	0.00442062	0.169013
380	2L	7701956	7702250	peak_2781_Mid	FBgn0041181	Tep3	0.413324	0.00440714	0.169013
399	X	18864919	18865233	peak_37869_Young	FBgn0085430	CG34401	-0.386677	0.00442112	0.169013
406	2L	9437347	9437612	peak_3349_Young	FBgn0002973	numb	0.316546	0.0043749	0.169013
412	3R	24660511	24660760	peak_28998_Young	FBgn0003429	slo	-0.772358	0.00442905	0.169013
421	3L	6400380	6400637	peak_16737_Young	FBgn0261801	CG42747	0.299101	0.00439612	0.169013
388	4	1084692	1084954	peak_31900_Young	FBgn0024913	Actbeta	-0.399507	0.00444231	0.169096
428	3R	7810348	7810615	peak_23798_Young	FBgn0037521	CG2993	0.27831	0.00448341	0.170236
375	3R	27656973	27657255	peak_29952_Young	FBgn0266579	tau	-0.520774	0.00452035	0.170859
376	2L	18670981	18671428	peak_6033_Old	FBgn0263079	CG43338	-0.478016	0.00452221	0.170859
404	3L	14682873	14683128	peak_19225_Young	FBgn0036437	CG5048	0.366078	0.00454169	0.171171
381	2R	23925062	23925328	peak_13963_VeryOld	FBgn0034931	CG2812	0.49092	0.00458707	0.172456
409	3L	8057585	8057847	peak_17221_Young	FBgn0026263	bip1	-0.348369	0.0046144	0.172877
423	3R	26990097	26990366	peak_29747_Young	FBgn0051075	CG31075	0.333078	0.00462318	0.172877
439	2L	1077708	1077961	peak_568_Young	FBgn0015905	ast	0.278723	0.00463225	0.172877
407	3R	18183342	18183594	peak_26918_Young	FBgn0038576	Arp5	0.324975	0.00464442	0.172908
387	2L	22577419	22577668	peak_7191_Mid	FBgn0040011	Slmap	0.648908	0.00468489	0.173834
416	3L	3655146	3655463	peak_15896_Young	FBgn0035455	CG10862	0.331795	0.00469207	0.173834
417	2R	4242845	4243106	peak_7394_Young	FBgn0262117	IntS3	0.37697	0.0047096	0.174061
430	3R	29682368	29682665	peak_30635_Young	FBgn0013972	Gycalpha99B	-0.29191	0.00473687	0.174646
420	3R	24530277	24530992	peak_28954_Young	FBgn0262167	ana1	0.327036	0.00477013	0.175441
426	X	10072672	10072921	peak_35203_Young	FBgn0030174	CG15312	-0.787119	0.0047814	0.175441
447	2R	22936669	22936924	peak_13589_Young	FBgn0034803	CG9849	0.284475	0.00481168	0.176128
400	2L	18670699	18670962	peak_6032_Young	FBgn0263079	CG43338	-0.453313	0.00484884	0.176221
424	3R	6660006	6660258	peak_23486_Young	FBgn0024912	agt	0.330183	0.0048262	0.176221
425	X	2796383	2796655	peak_33125_Young	FBgn0003996	w	0.327535	0.00484829	0.176221
432	3R	10852292	10852549	peak_24756_Young	FBgn0037841	CG4565	0.332825	0.00487997	0.176931
401	3L	15303675	15303941	peak_19418_Young	FBgn0036492	Best3	-0.458137	0.00491703	0.177852
398	2L	7401862	7402114	peak_2681_Young	FBgn0031907	CG5171	-0.499795	0.00497721	0.17822
405	2R	13498922	13499188	peak_10364_Young	FBgn0033845	mars	-0.51992	0.0049479	0.17822
410	2R	9827537	9827812	peak_9211_Young	FBgn0033447	dila	-0.469179	0.00502061	0.17822
418	3R	10850497	10850835	peak_24755_Young	FBgn0037841	CG4565	-0.359933	0.00500575	0.17822
422	2R	9139555	9139902	peak_8965_Young	FBgn0260972	alc	-0.331905	0.00495536	0.17822
433	2R	22119983	22120245	peak_13250_Young	FBgn0002715	mei-S332	-0.437585	0.00501373	0.17822
450	X	805943	806197	peak_32210_Young	FBgn0260855	Sec22	0.295112	0.00500807	0.17822
451	2L	7827642	7827894	peak_2812_Young	FBgn0004177	mts	0.300182	0.00500809	0.17822
419	3L	12790991	12791263	peak_18695_Young	FBgn0261674	CG42709	-0.472694	0.00510107	0.180656
460	2R	24402300	24402552	peak_14187_Young	FBgn0035001	slik	0.288853	0.00511727	0.18081
403	3R	25265368	25265631	peak_29196_Mid	FBgn0039306	RIOK2	0.476763	0.00515503	0.181724
408	3R	9510827	9511084	peak_24336_Young	FBgn0267790	rump	-0.478354	0.00517581	0.182036
435	2R	14360148	14360414	peak_10660_Young	FBgn0033928	Arc2	0.342007	0.00524376	0.184002
411	2R	6196181	6196447	peak_7796_Young	FBgn0262867	Ptr	-0.528905	0.00528131	0.184894
472	3L	25115837	25116095	peak_22288_Young	FBgn0040020	MED21	0.317755	0.00535986	0.187215
434	2R	21972996	21973258	peak_13192_Young	FBgn0034674	CG9304	0.364647	0.00541186	0.188286
462	X	18276766	18277028	peak_37654_Young	FBgn0053542	upd3	-0.368268	0.00541519	0.188286
446	X	14200028	14200286	peak_36418_Young	FBgn0026713	l(1)G0007	0.374291	0.00543593	0.188577
465	X	2918661	2918917	peak_33161_Young	FBgn0025643	CG3588	0.365317	0.0054896	0.190007
415	2L	18829705	18829974	peak_6091_Young	FBgn0015808	ScpX	-0.550349	0.00557536	0.190762
441	X	16633031	16633312	peak_37139_Young	FBgn0030764	CG9777	-0.414738	0.00558841	0.190762
454	2R	12034180	12034475	peak_9948_Young	FBgn0033677	CG8321	0.310246	0.00557378	0.190762
459	X	437649	437908	peak_32046_Young	FBgn0011822	pcl	0.366057	0.0056033	0.190762
467	3L	4242577	4242831	peak_16101_Young	FBgn0011692	pav	0.298315	0.00560437	0.190762
469	3L	2257533	2258049	peak_15409_Young	FBgn0015359	CG2034	0.292211	0.00553342	0.190762
482	3R	3622968	3623484	peak_22433_Young	FBgn0086378	Alg-2	0.318802	0.00555314	0.190762
497	2R	24767578	24767833	peak_14343_Young	FBgn0027590	GstE12	0.262486	0.00561138	0.190762
492	3R	19861210	19861731	peak_27455_Young	FBgn0038737	CG11447	0.271341	0.00567092	0.192358
471	3R	20564009	20564271	peak_27664_Young	FBgn0038804	CG10877	0.324018	0.00570668	0.192914
483	2R	14576909	14577187	peak_10725_Young	FBgn0010397	LamC	-0.306691	0.0057126	0.192914
429	2L	16358103	16358352	peak_5391_Young	FBgn0025678	CaBP1	-0.581126	0.00575431	0.193466
456	2L	8865114	8865363	peak_3191_Young	FBgn0032072	CG9483	-0.774307	0.00574753	0.193466
427	3R	16347671	16347946	peak_26462_Young	FBgn0027095	Manf	-0.5776	0.00580251	0.194153
438	3L	16091294	16091575	peak_19663_Young	FBgn0036565	CG5235	-0.385266	0.00583712	0.194153
442	X	9163643	9163892	peak_34930_VeryOld	FBgn0026206	mei-P26	0.403763	0.00580329	0.194153
445	3R	26977987	26978291	peak_29734_Mid	FBgn0039467	CG14253	0.390023	0.00583832	0.194153
461	X	7954298	7954547	peak_34579_Young	FBgn0029987	CG15330	-0.806402	0.0058147	0.194153
464	X	19642685	19642953	peak_38174_Mid	FBgn0031049	Sec61gamma	0.409551	0.00586468	0.194605
473	3L	8519269	8519542	peak_17397_Young	FBgn0035904	GstO3	-0.374888	0.00587776	0.194616
449	2L	576826	577092	peak_357_Mid	FBgn0023489	Pph13	0.450591	0.00592761	0.195419
466	X	9284297	9284555	peak_34971_Young	FBgn0002576	lz	-0.329363	0.00592566	0.195419
480	X	6266118	6266433	peak_34105_Young	FBgn0028982	Spt6	-0.372985	0.00597557	0.196485
500	2R	8173965	8174217	peak_8566_Young	FBgn0053087	LRP1	0.286676	0.0059857	0.196485
470	2R	13941087	13941343	peak_10497_Young	FBgn0013733	shot	-0.408489	0.00600502	0.196697
436	2R	5145175	5145447	peak_7495_Mid	FBgn0033010	Atf6	0.520088	0.00604806	0.19726
481	3L	27859290	27859747	peak_22375_Young	FBgn0020660	eIF-4B	0.401311	0.00604498	0.19726
437	3R	8654272	8654538	peak_24045_Young	FBgn0000447	Dhod	-0.561336	0.00614112	0.199608
440	X	17587781	17588057	peak_37450_Young	FBgn0030846	CG12992	-0.497963	0.00614621	0.199608
443	2L	6006583	6006868	peak_2182_Old	FBgn0001089	Gal	0.477612	0.00617548	0.200133
448	3L	15981410	15981659	peak_19617_Young	FBgn0000115	Arl1	-0.679921	0.00619338	0.200288
444	3L	12275505	12275754	peak_18559_Young	FBgn0036273	CG10426	-0.494568	0.00621268	0.200297
484	3R	20008418	20008678	peak_27519_Young	FBgn0038760	MED25	0.321313	0.00621991	0.200297
474	X	647421	647684	peak_32134_Young	FBgn0025638	Roc1a	0.353282	0.00628207	0.201873
509	3L	16667933	16668247	peak_19873_Young	FBgn0010223	Galphaf	0.317519	0.00632147	0.202287
530	2R	18855077	18855331	peak_12117_Young	FBgn0010053	Jheh1	0.248251	0.00631433	0.202287
463	X	18083958	18084231	peak_37592_Young	FBgn0030891	dik	-0.440189	0.00635169	0.202747
510	2R	24402577	24402833	peak_14188_Young	FBgn0035001	slik	0.286516	0.0063624	0.202747
485	2R	23159773	23160022	peak_13658_Young	FBgn0034828	CG13545	-0.780102	0.00641441	0.203554
496	2R	10423216	10423473	peak_9429_Young	FBgn0033520	Prx2540-1	-0.335414	0.00640961	0.203554
457	2R	7663641	7664028	peak_8359_Young	FBgn0033204	CG2065	-0.502326	0.0064283	0.203572
452	3R	18227429	18227715	peak_26938_Young	FBgn0038586	CG7168	-0.469884	0.00647923	0.20476
487	2R	10246355	10246604	peak_9366_Young	FBgn0033499	CG12914	-0.717595	0.00650843	0.205258
453	2L	11834124	11834373	peak_4049_Mid	FBgn0266363	CG45011	0.563183	0.00657618	0.206247
486	4	129043	129336	peak_31610_Young	FBgn0011747	Ank	-0.412514	0.00658034	0.206247
490	3R	20988523	20988785	peak_27807_Young	FBgn0263400	CG43446	-0.455371	0.00655902	0.206247
488	X	14653736	14653996	peak_36509_Young	FBgn0015773	NetA	0.374584	0.00666593	0.208502
455	2L	10743526	10743785	peak_3771_Mid	FBgn0032296	CG6729	0.490449	0.0066826	0.208595
458	3R	31977936	31978200	peak_31552_Young	FBgn0039886	CG2003	-0.488912	0.00670575	0.208787
526	X	2917836	2918140	peak_33160_Young	FBgn0025643	CG3588	0.313556	0.00671609	0.208787
531	X	11442228	11442557	peak_35656_Young	FBgn0030300	Sk1	-0.284485	0.00677074	0.210058
468	3L	22075272	22075522	peak_21769_VeryOld	FBgn0037150	CG7133	0.458547	0.00679494	0.21017
475	2R	16343320	16343609	peak_11314_Young	FBgn0034118	Nup62	-0.39008	0.00680188	0.21017
528	X	7527693	7527988	peak_34442_Young	FBgn0262612	CG43138	0.364803	0.00682712	0.210523
525	3R	13263710	13264195	peak_25441_Young	FBgn0003598	Su(var)3-7	0.291976	0.00684179	0.210551
478	3R	29256372	29256663	peak_30526_Young	FBgn0267104	CG45544	-0.477116	0.0068745	0.211132
489	X	7947000	7947253	peak_34577_Young	FBgn0027280	l(1)G0193	-0.39693	0.00693415	0.212536
491	3L	17631323	17631601	peak_20207_Young	FBgn0036742	CG7497	-0.482535	0.00700863	0.213107
502	2R	9958071	9958333	peak_9259_Young	FBgn0033466	Pal1	-0.336687	0.00700573	0.213107
508	2R	21713490	21713758	peak_13105_Young	FBgn0050403	CG30403	0.334485	0.00700728	0.213107
524	3R	31616183	31616445	peak_31371_Young	FBgn0039860	CG1792	0.332137	0.00699913	0.213107
505	X	7967218	7967482	peak_34585_Mid	FBgn0003656	sws	0.353289	0.00703101	0.213362
476	3R	22923391	22923868	peak_28415_Young	FBgn0039030	CG6660	-0.53086	0.00719087	0.216922
479	3L	6082698	6082985	peak_16612_Mid	FBgn0035677	CG13293	0.547517	0.00719094	0.216922
527	2R	14756165	14756869	peak_10774_Young	FBgn0033961	CG12859	0.313577	0.00718404	0.216922
477	2R	12670122	12670371	peak_10114_Young	FBgn0261673	nemy	-0.535531	0.00722295	0.217458
567	3L	199176	199427	peak_14614_Young	FBgn0035107	mri	0.267306	0.00727719	0.218659
493	2L	8937212	8937500	peak_3208_Mid	FBgn0032075	Tsp29Fb	0.373617	0.00729566	0.218784
512	3L	2738791	2739040	peak_15579_Young	FBgn0020509	Acp62F	-0.715062	0.00736665	0.220219
513	2R	8712282	8712531	peak_8798_Young	FBgn0033327	PGRP-SC1b	-0.743537	0.00737236	0.220219
537	2R	8647801	8648069	peak_8765_Young	FBgn0003892	ptc	-0.35745	0.00743139	0.221116
610	X	9868667	9868922	peak_35144_Young	FBgn0266430	CG45060	0.23995	0.00742163	0.221116
494	3L	20004549	20004832	peak_20953_Mid	FBgn0261574	kug	0.427919	0.00746281	0.221619
495	2L	7799103	7799379	peak_2798_Young	FBgn0031951	r2d2	-0.43137	0.00757441	0.222393
520	3L	21934567	21934845	peak_21704_Young	FBgn0037140	CG7442	-0.436331	0.00759398	0.222393
533	3L	3046690	3046947	peak_15685_Young	FBgn0052484	Sk2	0.35395	0.00761333	0.222393
535	2R	16271873	16272128	peak_11285_Young	FBgn0053017	CG33017	0.311715	0.00756224	0.222393
540	2R	6716019	6716273	peak_7949_Young	FBgn0033095	CG3409	0.304312	0.00752969	0.222393
555	2R	4012691	4012951	peak_7377_Young	FBgn0046706	Haspin	0.325349	0.00757645	0.222393
556	3L	9462040	9462301	peak_17701_Young	FBgn0266101	CG44838	-0.306158	0.00761471	0.222393
570	X	10211911	10212179	peak_35241_Young	FBgn0028342	l(1)G0230	0.28339	0.00761998	0.222393
615	3L	22461051	22461315	peak_21965_Young	FBgn0037163	laza	0.245929	0.00756971	0.222393
507	2L	19764845	19765109	peak_6444_Young	FBgn0032820	fbp	-0.379627	0.00766374	0.223243
501	X	15805011	15805280	peak_36908_Young	FBgn0003345	sd	-0.436101	0.00769539	0.223738
498	3R	22449011	22449269	peak_28284_Young	FBgn0085405	CG34376	-0.510029	0.00776797	0.224991
551	X	5754884	5755145	peak_33940_Young	FBgn0029801	CG15771	0.285103	0.00775563	0.224991
521	3R	29913390	29913639	peak_30741_Young	FBgn0039722	Capa	-0.665792	0.00782284	0.226151
499	X	20934575	20934870	peak_38567_Young	FBgn0261675	Npc1b	-0.479232	0.007885	0.227088
578	2L	3477752	3478045	peak_1370_Young	FBgn0261560	Thor	0.273566	0.00787777	0.227088
504	3L	21270711	21270996	peak_21435_Young	FBgn0037064	CG9389	-0.47003	0.00790941	0.227202
543	3L	5561215	5561712	peak_16451_Young	FBgn0010894	sinu	0.31574	0.00791873	0.227202
581	2R	10618362	10618639	peak_9510_Young	FBgn0033538	CG11883	-0.294955	0.007955	0.227388
597	3L	3303593	3304085	peak_15768_Young	FBgn0035431	CG14968	0.248571	0.00795106	0.227388
503	2R	19949772	19950298	peak_12466_Young	FBgn0034478	CG10822	-0.452628	0.00797734	0.2276
544	X	16406542	16406814	peak_37077_Young	FBgn0030746	CG9981	-0.325951	0.00799825	0.227771
506	3R	23709885	23710164	peak_28678_Young	FBgn0039107	CG10300	-0.683373	0.0081791	0.229606
515	2L	22550487	22550795	peak_7189_Mid	FBgn0040010	CG17493	0.397172	0.0081658	0.229606
516	3L	11112677	11112926	peak_18185_Young	FBgn0003462	Sod	-0.68078	0.00821625	0.229606
534	3R	9364189	9364438	peak_24283_Young	FBgn0037683	CG18473	-0.749663	0.00822816	0.229606
560	3R	32036564	32036824	peak_31577_Young	FBgn0039887	CG2053	-0.381407	0.00819108	0.229606
565	X	1821066	1821325	peak_32700_Mid	FBgn0029589	CG14810	0.32298	0.00812161	0.229606
569	2L	1077024	1077287	peak_566_Young	FBgn0015905	ast	-0.344505	0.00820579	0.229606
585	2R	25011888	25012143	peak_14449_Young	FBgn0004055	uzip	0.288827	0.00822209	0.229606
587	3L	22741282	22741533	peak_22094_Young	FBgn0037188	CG7369	0.308089	0.00822309	0.229606
611	3R	6008469	6008724	peak_23259_Young	FBgn0003261	Rm62	0.268266	0.00819636	0.229606
630	2R	7045629	7045885	peak_8094_Young	FBgn0033134	Tsp42El	0.24362	0.0082013	0.229606
577	X	17599447	17599701	peak_37454_Young	FBgn0026313	X11L	0.281037	0.00824621	0.22969
511	X	10838979	10839228	peak_35490_Young	FBgn0040850	CG15210	-0.458073	0.00830968	0.229781
518	X	9664699	9665064	peak_35099_Young	FBgn0030148	CG3106	-0.438944	0.00828834	0.229781
546	X	530118	530376	peak_32089_Young	FBgn0000108	Appl	0.33927	0.00829398	0.229781
586	3L	19815522	19815776	peak_20872_Young	FBgn0023094	cyc	-0.293783	0.00830681	0.229781
514	X	11440446	11440695	peak_35654_Young	FBgn0030300	Sk1	-0.501883	0.00838594	0.23147
545	2R	24037805	24038061	peak_14024_Young	FBgn0034964	IntS1	0.356712	0.00843174	0.231896
588	3L	20949948	20950212	peak_21301_Young	FBgn0011591	fng	-0.278545	0.00842601	0.231896
550	2L	10760936	10761199	peak_3778_Young	FBgn0027550	CG6495	0.383056	0.00844903	0.231953
652	2R	9692658	9692920	peak_9169_Young	FBgn0023143	Uba1	0.239717	0.00847817	0.232335
536	3L	11698114	11698428	peak_18363_VeryOld	FBgn0036194	CG11652	-0.763061	0.00849412	0.232355
517	3R	11689934	11690186	peak_24982_Young	FBgn0037935	CG6834	-0.52223	0.00852587	0.232807
519	2R	10729140	10729389	peak_9531_Mid	FBgn0033544	CG7220	0.613225	0.00859119	0.232992
522	3R	27871950	27872407	peak_30020_Young	FBgn0039552	CG12426	-0.550218	0.00865403	0.232992
532	3R	5565440	5565701	peak_23063_Young	FBgn0037341	CG12746	-0.408472	0.00858845	0.232992
538	2R	1591230	1591485	peak_7318_Mid	FBgn0039993	CG17691	0.430659	0.00867971	0.232992
564	3R	25287218	25287474	peak_29207_Young	FBgn0039315	CG13658	-0.386743	0.00863713	0.232992
582	2L	19528220	19528473	peak_6375_Young	FBgn0032799	CG10166	-0.332603	0.00863548	0.232992
591	X	10474558	10474810	peak_35330_Young	FBgn0030206	CG2889	0.302954	0.0086439	0.232992
600	2L	480504	480774	peak_318_Old	FBgn0043364	cbt	0.275895	0.00868532	0.232992
616	3R	6351759	6352024	peak_23383_Young	FBgn0267698	Pak	-0.280822	0.00867377	0.232992
676	2L	1420426	1420680	peak_706_Young	FBgn0002543	lea	0.271274	0.00860447	0.232992
523	2R	22375470	22375719	peak_13361_Mid	FBgn0034722	Rtf1	0.579285	0.00877254	0.233282
554	2L	16791350	16791631	peak_5534_Young	FBgn0032603	CG17928	-0.357171	0.00875169	0.233282
574	2L	10387943	10388196	peak_3661_Young	FBgn0000413	da	0.319303	0.00874894	0.233282
583	2L	5805236	5805500	peak_2105_Young	FBgn0031741	CG11034	-0.329187	0.00876088	0.233282
598	2R	12636040	12636296	peak_10101_Young	FBgn0011604	Iswi	0.297148	0.00874714	0.233282
629	2L	6380689	6380960	peak_2348_Young	FBgn0031808	CG9507	0.27086	0.00885342	0.235024
529	3L	15687219	15687468	peak_19533_Young	FBgn0085481	CG34452	-0.550463	0.00889788	0.235794
596	3R	10388743	10389003	peak_24640_Young	FBgn0259938	cwo	-0.375078	0.00892564	0.235927
609	2L	22131275	22131528	peak_7132_Young	FBgn0025674	CycK	0.295622	0.0089338	0.235927
605	2L	16714134	16714407	peak_5490_Young	FBgn0086907	Cyt-c-d	-0.42278	0.0089871	0.236924
593	X	6255005	6255632	peak_34100_Young	FBgn0015818	Spx	-0.313951	0.00903146	0.237683
542	3L	5135919	5136183	peak_16370_Mid	FBgn0035591	CG4611	0.475683	0.00919053	0.241453
539	2L	8239026	8239291	peak_2965_Young	FBgn0032006	Pvr	-0.553211	0.00922569	0.241931
667	3R	14088181	14088722	peak_25681_Young	FBgn0038198	Npc2b	0.322067	0.00924043	0.241931
541	X	6076555	6077007	peak_34050_Young	FBgn0029837	Tsp5D	-0.504128	0.00927367	0.242135
562	3L	4687815	4688064	peak_16237_Young	FBgn0035567	CG7514	-0.792144	0.00927995	0.242135
623	3L	15500789	15501044	peak_19457_Young	FBgn0036501	CG7272	0.284712	0.00930928	0.242486
547	2L	16790925	16791196	peak_5533_Young	FBgn0032603	CG17928	-0.455272	0.0094793	0.242857
549	2R	9876374	9876623	peak_9235_Young	FBgn0011241	cbx	-0.593363	0.00951266	0.242857
553	X	16277822	16278071	peak_37020_VeryOld	FBgn0000536	eas	0.405772	0.00947098	0.242857
558	2R	7714331	7714580	peak_8384_Young	FBgn0033216	CG1946	-0.676178	0.00945629	0.242857
566	3L	6933351	6933600	peak_16870_Young	FBgn0035718	CG14820	-0.71953	0.00942224	0.242857
645	3R	14754618	14755131	peak_25886_Young	FBgn0038258	CG7362	-0.314799	0.00948278	0.242857
651	3R	19403279	19403538	peak_27308_Young	FBgn0038704	CG5316	0.293844	0.0093988	0.242857
653	2R	22121516	22121772	peak_13252_Young	FBgn0002715	mei-S332	-0.416606	0.00947625	0.242857
655	3L	24537226	24537480	peak_22266_Young	FBgn0044510	mRpS5	0.305386	0.00951105	0.242857
656	3L	12266012	12266500	peak_18554_Young	FBgn0052100	CG32100	0.263536	0.00939745	0.242857
684	2L	19423419	19423683	peak_6321_Young	FBgn0032779	CG16771	-0.265599	0.00951446	0.242857
690	X	18276178	18276446	peak_37653_Young	FBgn0053542	upd3	-0.287196	0.00945171	0.242857
548	3R	16503007	16503265	peak_26520_Old	FBgn0028381	Decay	0.468039	0.0095521	0.243069
552	3R	31195820	31196069	peak_31195_Young	FBgn0039827	CG1544	-0.6045	0.00958084	0.243069
608	X	16415136	16415401	peak_37080_Young	FBgn0030748	Traf-like	-0.408169	0.00961742	0.243069
612	2R	8420893	8421390	peak_8673_Young	FBgn0028836	CSN7	0.320998	0.00960368	0.243069
647	3R	26452375	26452627	peak_29535_Young	FBgn0039427	CG5447	0.294656	0.00961829	0.243069
699	3R	31219517	31219781	peak_31206_Young	FBgn0039831	CG12054	0.243282	0.00961355	0.243069
663	X	15448136	15448394	peak_36762_Young	FBgn0014455	Ahcy13	-0.27629	0.00965194	0.243516
622	3R	14481227	14481482	peak_25809_Young	FBgn0086901	cv-c	0.313296	0.00970036	0.244334
621	2R	13448568	13448829	peak_10338_Young	FBgn0086757	cbs	-0.324689	0.00973022	0.244682
573	3R	15536461	15536716	peak_26145_Young	FBgn0267408	AOX1	-0.375964	0.00977883	0.245068
575	2R	22401969	22402218	peak_13377_Young	FBgn0034724	babos	-0.391411	0.00982139	0.245068
599	X	1287306	1287555	peak_32430_Mid	FBgn0025642	CG32812	0.331532	0.00982983	0.245068
626	2R	18134526	18134783	peak_11882_Young	FBgn0003044	Pcl	0.299841	0.00981964	0.245068
642	3L	6075142	6075395	peak_16605_Young	FBgn0035676	ssp6	0.307816	0.0097963	0.245068
661	3L	23714876	23715132	peak_22223_Young	FBgn0039977	CG17454	0.319012	0.00984189	0.245068
711	X	13413017	13413272	peak_36204_Young	FBgn0030486	Set2	0.23856	0.00986093	0.245142
557	X	7333317	7333566	peak_34420_Mid	FBgn0261848	CG42780	0.57573	0.00992628	0.246232
640	2R	15992264	15992726	peak_11172_Young	FBgn0034059	CG8320	0.302341	0.00993704	0.246232
559	2R	10798640	10798889	peak_9555_Mid	FBgn0053144	CG33144	0.582641	0.00995974	0.246395
643	3R	14655576	14655831	peak_25848_Young	FBgn0086686	l(3)L1231	0.30249	0.00998617	0.246649
674	X	1171285	1171537	peak_32358_Young	FBgn0040364	CG11378	-0.28373	0.0100786	0.248529
563	3L	16482863	16483112	peak_19804_Young	FBgn0004569	aos	-0.509571	0.0100949	0.248531
561	3R	19847954	19848226	peak_27450_Young	FBgn0038735	CG4662	-0.535639	0.010126	0.248895
671	2R	5307102	5307359	peak_7505_Young	FBgn0261403	sxc	0.284059	0.0101669	0.249497
634	2R	11384404	11384663	peak_9737_Young	FBgn0033631	Sod3	0.320751	0.0102	0.249908
568	3R	27116968	27117217	peak_29780_Mid	FBgn0039489	CG5880	0.511473	0.0102715	0.250453
625	3R	20558166	20558423	peak_27661_Young	FBgn0043457	CG5180	0.331875	0.0102556	0.250453
717	2R	14173541	14173795	peak_10581_Young	FBgn0000289	cg	0.253603	0.0102553	0.250453
631	2L	16716443	16716717	peak_5493_Young	FBgn0086907	Cyt-c-d	-0.354633	0.0102952	0.250539
638	X	9550796	9551054	peak_35035_Young	FBgn0267253	CG32700	0.30484	0.0103078	0.250539
713	2L	452926	453178	peak_303_Young	FBgn0031256	CG4164	0.243447	0.0103245	0.250546
571	2R	14847292	14847541	peak_10792_Mid	FBgn0033971	CG10209	0.553023	0.0104719	0.251964
572	3R	6156097	6156473	peak_23307_Young	FBgn0051559	CG31559	-0.499615	0.0105335	0.251964
576	2L	8344549	8344811	peak_2998_Young	FBgn0032025	CG7778	-0.584519	0.010599	0.251964
579	2R	22997942	22998217	peak_13601_Young	FBgn0034808	CG9896	-0.477916	0.010614	0.251964
584	2R	23700839	23701100	peak_13884_Young	FBgn0013548	l(2)dtl	-0.462015	0.010512	0.251964
603	2L	22578413	22578726	peak_7193_Mid	FBgn0040011	Slmap	0.511993	0.0105704	0.251964
604	2L	6225824	6226073	peak_2286_Young	FBgn0026755	Ugt37b1	-0.741839	0.0105005	0.251964
650	2R	23908711	23908974	peak_13961_Young	FBgn0015268	Nap1	-0.322083	0.0105782	0.251964
654	X	14602491	14602762	peak_36501_Young	FBgn0030574	CG9413	0.444036	0.0105563	0.251964
660	3L	18665657	18665919	peak_20494_Young	FBgn0260027	CG42495	0.33232	0.0104479	0.251964
686	X	3718630	3718900	peak_33401_Young	FBgn0086899	tlk	-0.377784	0.0104863	0.251964
688	X	2094398	2094652	peak_32819_Young	FBgn0000382	csw	-0.27468	0.0104109	0.251964
695	3R	25851467	25851723	peak_29379_Young	FBgn0039379	CG5886	0.302156	0.0105948	0.251964
712	2L	14355004	14355261	peak_4796_Young	FBgn0015791	Rab14	0.256323	0.0104172	0.251964
589	X	19625535	19625784	peak_38164_Young	FBgn0031045	CG14212	-0.591946	0.0106968	0.252613
592	X	6678009	6678280	peak_34216_Young	FBgn0028336	l(1)G0255	-0.442469	0.0107007	0.252613
595	3L	11958583	11958832	peak_18452_Young	FBgn0036230	CG11570	-0.595968	0.0107076	0.252613
714	3L	10186923	10187181	peak_17925_Young	FBgn0052057	dpr10	0.301959	0.010707	0.252613
580	2L	2251805	2252191	peak_988_Young	FBgn0042187	CG17234	-0.576009	0.0107279	0.252655
722	2L	6089708	6089972	peak_2229_Young	FBgn0266445	CG45075	-0.336261	0.0107425	0.252655
697	3L	11833468	11833731	peak_18420_Young	FBgn0000404	CycA	0.281076	0.0107956	0.25315
709	2R	20552005	20552263	peak_12681_Young	FBgn0034517	Cpr57A	0.289449	0.0108133	0.25315
730	2L	6323615	6323869	peak_2321_Young	FBgn0265778	PDZ-GEF	0.268145	0.0108069	0.25315
594	3L	8405560	8405824	peak_17348_Mid	FBgn0035890	CG13667	0.486724	0.0108641	0.253276
636	3L	19446012	19446280	peak_20756_Young	FBgn0023395	Chd3	0.379466	0.0108813	0.253276
677	2R	15115576	15115825	peak_10890_VeryOld	FBgn0015371	chn	0.339313	0.010885	0.253276
752	2L	14274183	14274442	peak_4759_Young	FBgn0052971	CG32971	0.291068	0.0108678	0.253276
590	2L	23313815	23314068	peak_7254_VeryOld	FBgn0058042	CG40042	0.612114	0.0109449	0.253509
670	3R	15548151	15548411	peak_26150_Young	FBgn0038349	AOX3	-0.32319	0.0109177	0.253509
861	3R	26006046	26006717	peak_29419_Young	FBgn0002733	E(spl)mbeta-HLH	0.187494	0.0109416	0.253509
704	3L	13964604	13964864	peak_19011_Young	FBgn0263232	Nxf3	0.291562	0.0109944	0.254271
602	3R	12858856	12859124	peak_25335_Mid	FBgn0038088	CG10126	0.438026	0.0110607	0.255417
619	3L	23149950	23150207	peak_22195_Mid	FBgn0052350	CG32350	0.404794	0.0111051	0.256054
601	2R	4788900	4789161	peak_7460_Mid	FBgn0250830	CG12547	0.532484	0.0111392	0.256454
618	X	15688028	15688277	peak_36852_Young	FBgn0030667	CG15599	-0.695338	0.0111832	0.256692
669	2L	8542262	8542521	peak_3089_Young	FBgn0011259	Sema-1a	0.358528	0.0111674	0.256692
633	2L	306241	306503	peak_244_Young	FBgn0004611	Plc21C	-0.39896	0.0112442	0.257705
606	3L	12432596	12432845	peak_18593_Mid	FBgn0036285	toe	0.56828	0.0113303	0.258309
620	2R	18970768	18971017	peak_12145_VeryOld	FBgn0267351	Topors	0.389653	0.0113383	0.258309
657	2L	819357	819617	peak_458_Young	FBgn0015621	Clp	0.349508	0.0113291	0.258309
665	3R	7124712	7124970	peak_23603_Young	FBgn0037472	CG10098	-0.344726	0.0113159	0.258309
747	X	927490	927741	peak_32259_Young	FBgn0040339	MED22	0.262129	0.0113702	0.258652
607	2L	5557664	5558127	peak_2026_VeryOld	FBgn0020429	GluRIIB	-0.494969	0.0114177	0.259344
617	2L	14744895	14745144	peak_4950_Young	FBgn0261567	CG42681	-0.578364	0.0114834	0.259664
702	2R	23908048	23908474	peak_13960_Young	FBgn0015268	Nap1	-0.350399	0.0115154	0.259664
708	2L	3164580	3164843	peak_1280_Young	FBgn0014906	Hydr2	-0.45858	0.0114837	0.259664
725	3L	3811113	3811365	peak_15950_Young	FBgn0035464	CG12006	0.299138	0.0115168	0.259664
764	3R	24649930	24650191	peak_28994_Young	FBgn0000139	ash2	0.252633	0.0115006	0.259664
637	2R	24078907	24079156	peak_14042_Young	FBgn0034973	CG13564	-0.662865	0.0115344	0.259678
727	3L	13450598	13450852	peak_18886_Young	FBgn0036368	CG10738	0.288587	0.0115599	0.259708
742	2L	12719115	12719422	peak_4273_Young	FBgn0032456	MRP	0.28038	0.0115698	0.259708
624	X	5951316	5951623	peak_34002_Young	FBgn0029827	CG6048	-0.418794	0.0116088	0.259819
754	3L	22878068	22878324	peak_22136_Young	FBgn0037202	Ssl1	0.267377	0.0115987	0.259819
614	3L	6163201	6163537	peak_16635_Old	FBgn0035687	CG13296	-0.594208	0.0116627	0.260643
613	2R	19375400	19375732	peak_12275_Young	FBgn0034439	CG10062	-0.572962	0.0116924	0.260925
646	2R	18695139	18695388	peak_12059_Young	FBgn0034377	CG15071	-0.67664	0.0117813	0.261002
696	3R	4641020	4641272	peak_22670_Young	FBgn0037261	CG9775	-0.313779	0.0117341	0.261002
756	2L	21262817	21263074	peak_6922_Young	FBgn0032938	CG8671	0.265729	0.0117617	0.261002
765	2L	7219954	7220210	peak_2635_Young	FBgn0031897	CG13784	0.280074	0.0117725	0.261002
769	2R	9588687	9589639	peak_9142_Young	FBgn0010342	Map60	0.250217	0.0117187	0.261002
662	2R	9389864	9390191	peak_9062_Young	FBgn0010549	l(2)03659	-0.381372	0.0118174	0.261044
782	3R	20327891	20328146	peak_27612_Young	FBgn0038788	Sirt2	0.250995	0.0118046	0.261044
627	2L	6709088	6709337	peak_2454_Mid	FBgn0031850	Tsp	0.504075	0.0121364	0.263107
628	2R	20751188	20751568	peak_12736_Old	FBgn0085230	CG34201	-0.512244	0.01215	0.263107
632	2R	12052289	12052538	peak_9956_Mid	FBgn0265373	CG44314	0.567085	0.0120967	0.263107
635	3L	15978310	15978559	peak_19616_Young	FBgn0036552	CG17028	-0.594073	0.0120936	0.263107
639	2R	6798069	6798370	peak_7987_VeryOld	FBgn0085421	Epac	0.474496	0.0123474	0.263107
641	3L	9727480	9727796	peak_17789_Young	FBgn0036039	Naa60	-0.468332	0.0121628	0.263107
648	3R	12976574	12976823	peak_25352_Young	FBgn0038099	CG7091	-0.673125	0.0121762	0.263107
659	2R	18445239	18445494	peak_11982_Mid	FBgn0034350	CG5189	0.408613	0.0120296	0.263107
666	3L	4687227	4687501	peak_16236_Young	FBgn0262870	axo	-0.412625	0.0123758	0.263107
673	3R	9774338	9774597	peak_24439_Young	FBgn0037750	Whamy	-0.523243	0.012095	0.263107
681	3L	18675687	18675965	peak_20500_Mid	FBgn0040323	GNBP1	0.386937	0.0123411	0.263107
685	2R	12936164	12936426	peak_10192_Young	FBgn0033785	Sans	0.342333	0.0119568	0.263107
715	3R	16356410	16356706	peak_26467_Young	FBgn0038420	CG10311	-0.334139	0.0123101	0.263107
719	2L	17477749	17478010	peak_5706_Young	FBgn0027885	Aac11	0.355297	0.0122798	0.263107
720	X	15944821	15945088	peak_36960_Young	FBgn0030711	Rrp47	0.32766	0.0123158	0.263107
723	2R	9092889	9093160	peak_8935_Young	FBgn0033373	CG8080	-0.292705	0.0119572	0.263107
735	3L	12041231	12041485	peak_18488_Young	FBgn0036242	CG6793	-0.423416	0.0120304	0.263107
738	2L	3477169	3477429	peak_1369_Young	FBgn0261560	Thor	0.294362	0.0121284	0.263107
745	2L	7495325	7495581	peak_2708_Young	FBgn0260486	Ziz	0.309844	0.0120092	0.263107
760	3R	7129699	7129963	peak_23605_Young	FBgn0051248	CG31248	-0.27868	0.0123653	0.263107
761	3L	2371819	2372303	peak_15442_Young	FBgn0035334	CG8993	0.311417	0.0121416	0.263107
770	3R	18298278	18298541	peak_26963_Young	FBgn0024432	Dlc90F	0.26629	0.0123446	0.263107
779	X	15224996	15225273	peak_36717_Young	FBgn0262486	CG43076	0.280688	0.0123515	0.263107
797	X	935073	935325	peak_32262_Young	FBgn0040340	TRAM	0.245552	0.0122547	0.263107
798	2L	12718613	12719043	peak_4272_Young	FBgn0032456	MRP	0.268975	0.0119789	0.263107
800	3L	6605988	6606255	peak_16806_Young	FBgn0024177	zpg	0.251178	0.0122975	0.263107
814	3R	13644930	13645186	peak_25535_Young	FBgn0015778	rin	0.24614	0.0123763	0.263107
759	2L	10396854	10397581	peak_3667_Young	FBgn0051716	Cnot4	-0.279185	0.0124295	0.263871
820	3R	30476393	30476657	peak_30948_Young	FBgn0260440	spdo	0.277457	0.0124488	0.263915
644	2R	10646948	10647197	peak_9514_Mid	FBgn0033541	CG12934	0.569087	0.0125027	0.264071
658	2L	19441184	19441454	peak_6334_Young	FBgn0003346	RanGAP	-0.492146	0.0125081	0.264071
689	3R	11875534	11875841	peak_25044_Mid	FBgn0003312	sad	0.408224	0.0124777	0.264071
668	3L	16286073	16286322	peak_19732_Young	FBgn0036594	CG13047	-0.763423	0.0125443	0.26447
762	2R	24963937	24964210	peak_14428_Young	FBgn0035087	CG2765	-0.306824	0.0125643	0.264526
724	3L	21434083	21434339	peak_21493_Young	FBgn0005694	Aef1	-0.344272	0.012618	0.26529
649	3R	23933488	23933737	peak_28761_Mid	FBgn0039130	CG5854	0.487525	0.0126908	0.265511
705	2L	17989827	17990467	peak_5802_Young	FBgn0051742	Prosbeta5R2	-0.406882	0.0126705	0.265511
755	2L	3712723	3712979	peak_1449_Young	FBgn0031566	CG2818	0.301629	0.0126828	0.265511
766	3L	10462521	10463219	peak_17978_Mid	FBgn0045770	S-Lap3	0.34842	0.0127297	0.265511
804	2L	2364839	2365091	peak_1020_Young	FBgn0261647	Axud1	0.262449	0.0127131	0.265511
829	X	2973764	2974020	peak_33194_Young	FBgn0003285	rst	0.283479	0.0127328	0.265511
731	3L	19046177	19046448	peak_20634_Young	FBgn0002945	nkd	0.354091	0.0127932	0.265684
809	2L	9387484	9387743	peak_3333_Young	FBgn0012036	Aldh	0.26665	0.0127934	0.265684
832	3L	16166396	16166687	peak_19694_Young	FBgn0036576	CG5151	0.297165	0.0127686	0.265684
679	X	8020420	8020669	peak_34594_Young	FBgn0029989	CG15333	-0.77836	0.0128727	0.265686
729	2L	12435474	12435764	peak_4183_Young	FBgn0265298	SC35	-0.326358	0.0129327	0.265686
743	X	12018776	12019030	peak_35858_Young	FBgn0030364	CG15735	0.312358	0.0129228	0.265686
748	2R	8444552	8444816	peak_8682_Young	FBgn0014469	Cyp4e2	0.298556	0.0128313	0.265686
763	X	19201505	19201952	peak_37984_Mid	FBgn0030997	CG7990	0.320935	0.0129093	0.265686
774	X	11441649	11441920	peak_35655_Young	FBgn0030300	Sk1	-0.320921	0.0128659	0.265686
778	2R	15009197	15009463	peak_10864_Young	FBgn0029082	hbs	0.297515	0.0129309	0.265686
803	2R	25084295	25084562	peak_14479_Young	FBgn0004919	gol	0.254792	0.0128519	0.265686
825	X	9553564	9553818	peak_35038_Young	FBgn0030136	RpS28b	0.23816	0.0129873	0.266449
672	X	18528806	18529055	peak_37746_Young	FBgn0030938	CG15047	-0.625789	0.0130993	0.266952
687	3L	16853918	16854180	peak_19950_Young	FBgn0003410	sina	-0.409433	0.0130682	0.266952
773	2R	17852308	17852825	peak_11806_Young	FBgn0050323	CG30323	-0.335722	0.0130486	0.266952
781	3L	18073741	18074005	peak_20347_Young	FBgn0264746	CG44004	-0.296718	0.0130979	0.266952
836	2L	8083639	8083896	peak_2911_Young	FBgn0261822	Bsg	-0.243911	0.013076	0.266952
694	2R	4829398	4829676	peak_7467_Mid	FBgn0033000	CG14464	0.411677	0.0132432	0.268452
698	3R	22530461	22530725	peak_28310_Young	FBgn0038981	CG5346	-0.369241	0.0132217	0.268452
737	3L	21823317	21823576	peak_21661_Mid	FBgn0037134	CG7407	0.359245	0.0132259	0.268452
838	3L	14053074	14053593	peak_19047_Young	FBgn0267795	CG32138	0.25279	0.0132018	0.268452
664	3R	28875425	28875730	peak_30349_Young	FBgn0039611	CG14528	-0.512941	0.0132624	0.268484
827	2L	6081286	6081540	peak_2222_Young	FBgn0266450	Kr-h1	0.268096	0.0132847	0.268581
678	3R	8288044	8288326	peak_23939_Mid	FBgn0037562	CG11671	0.455355	0.0133187	0.268861
680	2L	329369	329664	peak_254_Young	FBgn0264086	CG43755	-0.647036	0.0134645	0.268861
683	2L	5676376	5676650	peak_2063_Young	FBgn0031729	CG12511	-0.63539	0.0133804	0.268861
691	2L	5728292	5728541	peak_2078_Young	FBgn0031733	CG14006	-0.68651	0.0134784	0.268861
692	2R	21117593	21117870	peak_12861_Young	FBgn0034588	CG9394	-0.453085	0.0135776	0.268861
693	2L	4577794	4578043	peak_1748_Young	FBgn0031613	HP6	-0.801525	0.0134834	0.268861
700	3L	16323254	16323503	peak_19751_VeryOld	FBgn0036607	CG13059	-0.666383	0.0134721	0.268861
703	3L	27279640	27279903	peak_22364_Mid	FBgn0024804	Dbp80	0.418643	0.0135879	0.268861
721	2L	11066261	11066812	peak_3858_Young	FBgn0032330	Samuel	-0.378943	0.0134418	0.268861
726	X	2707406	2707694	peak_33092_Young	FBgn0024997	CG2681	-0.340449	0.0134335	0.268861
732	X	5915034	5915333	peak_33991_Young	FBgn0029824	CG3726	-0.45871	0.0135455	0.268861
740	3R	15832537	15833054	peak_26232_Young	FBgn0038369	Arpc3A	0.33867	0.0133413	0.268861
751	2L	1611022	1611275	peak_774_Mid	FBgn0031351	CG14352	0.347425	0.0134245	0.268861
758	2L	20870496	20870761	peak_6757_Young	FBgn0032900	CG14401	0.337511	0.0135977	0.268861
784	X	15910006	15910268	peak_36953_Young	FBgn0030706	CG8909	0.315957	0.0135981	0.268861
843	X	21605140	21605398	peak_38802_Young	FBgn0027588	CG14476	0.261624	0.0135685	0.268861
844	3L	8288727	8288989	peak_17311_Young	FBgn0027569	cert	-0.277303	0.0135878	0.268861
675	2L	14450410	14450753	peak_4831_Young	FBgn0028844	CG15283	-0.509895	0.0136401	0.269344
793	2R	6810169	6810646	peak_7993_Young	FBgn0265003	koi	0.280405	0.0136621	0.26943
749	2L	6367023	6367473	peak_2342_Old	FBgn0031805	CG9505	0.331939	0.0136812	0.269458
682	3R	21134120	21134369	peak_27859_Young	FBgn0038862	Ubpy	-0.555127	0.0137812	0.270728
741	2R	13047288	13047556	peak_10237_Young	FBgn0033788	CG13323	-0.386739	0.0137655	0.270728
716	3R	4749736	4749992	peak_22713_Mid	FBgn0010750	atms	0.392493	0.0138088	0.270921
744	2L	18503938	18504233	peak_5966_Young	FBgn0032683	kon	-0.348206	0.0138851	0.27207
790	3R	27580731	27580996	peak_29920_Young	FBgn0040080	pins	-0.308188	0.0139272	0.272394
874	2L	23174273	23174526	peak_7237_Young	FBgn0039958	CG12567	0.283182	0.0139373	0.272394
701	2L	13399299	13399636	peak_4474_Mid	FBgn0032521	CG7110	0.429585	0.0139686	0.272656
816	3R	31053784	31054041	peak_31152_Young	FBgn0010808	l(3)03670	0.301501	0.0140005	0.272929
883	2R	9711548	9711804	peak_9173_Young	FBgn0010316	dap	0.237843	0.0140363	0.273278
733	2R	14819059	14819774	peak_10788_Old	FBgn0033969	CG10202	-0.394052	0.0140832	0.273841
853	3R	14739768	14740053	peak_25879_Young	FBgn0263929	jvl	-0.280728	0.0141136	0.274084
707	3R	25219546	25219795	peak_29172_Young	FBgn0039293	CG11851	-0.660641	0.0141636	0.274357
785	3R	9573557	9573824	peak_24368_Young	FBgn0037714	CG9396	-0.329476	0.0141518	0.274357
854	2L	5037485	5037750	peak_1857_Young	FBgn0260451	CG14042	0.344612	0.0142724	0.275764
862	3L	9971942	9972440	peak_17883_Young	FBgn0036063	CG6674	0.259778	0.0142562	0.275764
855	3L	12040647	12040911	peak_18487_Young	FBgn0036242	CG6793	-0.320622	0.0143299	0.276525
840	2R	22180325	22180584	peak_13278_Young	FBgn0034706	CG11275	-0.370211	0.0143503	0.276533
868	2R	17568627	17569140	peak_11718_Young	FBgn0034243	Ns2	0.262477	0.0143665	0.276533
706	3L	21268497	21268775	peak_21433_Mid	FBgn0037063	CG9391	0.467879	0.014423	0.277271
750	2L	2873064	2873357	peak_1159_Young	FBgn0031478	CG8814	-0.400085	0.0144642	0.277714
830	X	13404541	13404803	peak_36201_Young	FBgn0030484	GstT4	-0.336377	0.0145991	0.279951
772	2L	3426063	3426332	peak_1355_Young	FBgn0031530	pgant2	-0.420127	0.0146355	0.280283
794	2L	16306987	16307481	peak_5368_Young	FBgn0011708	Syx5	-0.354688	0.014661	0.280283
842	2R	9137254	9137684	peak_8960_Young	FBgn0028955	CG8788	-0.284299	0.0146715	0.280283
734	2L	5661506	5661755	peak_2054_Young	FBgn0031728	Hsp60C	-0.637438	0.0147506	0.280923
771	3L	21726953	21727214	peak_21625_Young	FBgn0037121	Rpb8	-0.346758	0.014752	0.280923
826	2R	22179604	22179869	peak_13276_Young	FBgn0034706	CG11275	-0.295159	0.0147602	0.280923
710	2R	24493310	24493646	peak_14235_Young	FBgn0029501	Crtp	-0.522864	0.0148	0.281193
812	X	15453273	15453525	peak_36767_Young	FBgn0030638	CG11655	0.317535	0.0148297	0.281193
851	2R	24402846	24403103	peak_14189_Young	FBgn0035001	slik	0.262175	0.0148225	0.281193
718	2L	18114878	18115146	peak_5845_Young	FBgn0032665	CG15152	-0.508251	0.0149647	0.282002
736	3L	21685352	21685604	peak_21602_Young	FBgn0261059	Sfp78E	-0.674442	0.0149549	0.282002
813	2R	12756285	12756543	peak_10143_Young	FBgn0020930	Dgkepsilon	0.293268	0.0149207	0.282002
850	2R	17846769	17847069	peak_11801_Young	FBgn0015522	olf186-M	-0.263633	0.0149454	0.282002
915	3R	11869394	11869651	peak_25041_Young	FBgn0037956	CG6959	0.253823	0.0149177	0.282002
768	3R	30243428	30243800	peak_30861_Young	FBgn0039758	CG9737	-0.382099	0.015023	0.282751
864	X	15804181	15804452	peak_36906_Young	FBgn0003345	sd	-0.276656	0.0151357	0.284522
885	3R	14575802	14576060	peak_25825_Young	FBgn0020299	stumps	0.24696	0.0151899	0.284839
896	X	9599720	9600113	peak_35065_Young	FBgn0030141	Gga	0.258516	0.0151849	0.284839
728	3R	12959924	12960173	peak_25346_Young	FBgn0087021	Spc25	-0.603233	0.0152337	0.284961
859	3R	18298769	18299023	peak_26964_Young	FBgn0024432	Dlc90F	0.25771	0.0152157	0.284961
753	3L	1964318	1964583	peak_15290_Young	FBgn0265988	mv	-0.389021	0.0153258	0.286333
776	3R	23763141	23763398	peak_28701_Mid	FBgn0039114	Lsd-1	0.382658	0.0153609	0.286637
739	X	2623919	2624168	peak_33060_Young	FBgn0267350	PI4KIIIalpha	-0.604146	0.0153845	0.286727
780	3L	20497461	20497732	peak_21147_Young	FBgn0052425	CG32425	-0.390279	0.0154385	0.287382
757	3L	3903663	3903928	peak_15986_Mid	FBgn0041147	ida	0.391798	0.0154573	0.287382
822	X	15689754	15690008	peak_36853_VeryOld	FBgn0030667	CG15599	0.331522	0.0155891	0.287505
828	3L	5753662	5753951	peak_16514_Young	FBgn0016756	Ubp64E	-0.328261	0.015542	0.287505
831	2R	18854460	18854724	peak_12116_Young	FBgn0010053	Jheh1	-0.336258	0.0156523	0.287505
849	2L	18951756	18952011	peak_6126_Young	FBgn0032725	Nedd8	0.294196	0.0156287	0.287505
884	2L	12045801	12046080	peak_4111_Young	FBgn0032399	CG6785	0.253753	0.0155024	0.287505
905	2L	14689223	14689492	peak_4935_Young	FBgn0003016	osp	0.276109	0.015521	0.287505
932	3R	17534245	17534743	peak_26750_Young	FBgn0038516	P5cr-2	0.238023	0.0156013	0.287505
943	3L	10186057	10186315	peak_17924_Young	FBgn0052057	dpr10	0.2834	0.0156135	0.287505
949	X	16633634	16633908	peak_37140_Young	FBgn0030764	CG9777	-0.261128	0.015596	0.287505
1022	2R	8237649	8237906	peak_8595_Young	FBgn0013726	pnut	0.215048	0.0156505	0.287505
877	3R	8813540	8813821	peak_24123_Young	FBgn0037635	CG9837	-0.285473	0.0156756	0.287586
818	2R	7586959	7587223	peak_8327_Young	FBgn0004133	blow	0.328081	0.0157256	0.287829
942	X	9686238	9686498	peak_35114_Young	FBgn0261617	nej	0.260155	0.0157265	0.287829
892	2L	9125575	9125831	peak_3251_Young	FBgn0052982	CG32982	0.281751	0.0158128	0.289061
919	X	13845805	13846060	peak_36325_Young	FBgn0052626	AMPdeam	0.260158	0.0158749	0.289851
857	X	1161965	1162224	peak_32354_Young	FBgn0040368	eIF4E-7	0.305793	0.0159009	0.289978
819	X	3868816	3869065	peak_33460_VeryOld	FBgn0028491	CG2930	-0.33097	0.0159371	0.29029
930	2R	7381772	7382042	peak_8239_Young	FBgn0033159	Dscam1	-0.241238	0.0160414	0.290802
936	2R	9345033	9345299	peak_9052_Young	FBgn0033404	Or45a	0.269743	0.0160344	0.290802
946	2R	16551926	16552184	peak_11371_Young	FBgn0034135	Syn2	0.256027	0.0159947	0.290802
955	2R	23978256	23978521	peak_13989_Young	FBgn0005612	Sox14	-0.252754	0.0160151	0.290802
746	2L	18113429	18113678	peak_5842_Young	FBgn0032665	CG15152	-0.516855	0.0161071	0.291339
860	2L	827162	827479	peak_463_Young	FBgn0031286	CG3862	-0.3316	0.0161197	0.291339
916	2L	567968	568472	peak_353_Young	FBgn0031266	CG2807	0.256997	0.0161282	0.291339
897	2L	19425214	19425720	peak_6323_Young	FBgn0041789	Pax	-0.29211	0.0161699	0.291746
801	2R	24779733	24780014	peak_14347_Mid	FBgn0035063	Eap	0.38682	0.0162146	0.291863
948	3L	1546384	1546644	peak_15145_Young	FBgn0041342	Cct1	-0.261152	0.0162047	0.291863
952	3R	14108470	14108739	peak_25687_Young	FBgn0038202	CG12402	-0.288915	0.0162432	0.292033
893	2L	3719349	3719614	peak_1453_Young	FBgn0040104	lectin-24A	0.325536	0.0163198	0.293065
767	3L	1231333	1231582	peak_15030_Young	FBgn0053965	CG33965	-0.602921	0.0164947	0.295191
777	3R	3623780	3624082	peak_22435_Young	FBgn0086378	Alg-2	0.423172	0.0164898	0.295191
788	2R	8949617	8949866	peak_8887_VeryOld	FBgn0033357	Tom7	0.377292	0.016507	0.295191
925	2L	564004	564262	peak_352_Young	FBgn0031265	CG2794	0.265816	0.0165155	0.295191
957	2L	21828356	21828618	peak_7047_Young	FBgn0003866	tsh	-0.270431	0.0165491	0.295445
792	3R	3748632	3749111	peak_22451_Mid	FBgn0069923	CG41128	0.498321	0.0166516	0.296928
789	3R	5647198	5647465	peak_23108_Young	FBgn0262125	Sec23	-0.395551	0.0166815	0.297113
906	X	15713020	15713544	peak_36867_Young	FBgn0030674	CG8184	-0.347674	0.0167733	0.298401
808	3R	4394311	4394568	peak_22571_Young	FBgn0086608	CG34112	-0.416091	0.0167976	0.298484
918	X	13783569	13783831	peak_36294_Young	FBgn0261244	inaE	-0.262794	0.0168535	0.299131
1015	3R	31747464	31747724	peak_31427_Young	FBgn0022349	CG1910	0.221109	0.0168899	0.299428
971	2L	20716054	20716335	peak_6685_Young	FBgn0014859	Hr38	-0.275984	0.0169237	0.299679
775	3R	12094665	12094914	peak_25118_Young	FBgn0051361	dpr17	-0.59611	0.0170041	0.300405
924	3L	19447020	19447513	peak_20759_Young	FBgn0023395	Chd3	0.291688	0.0169904	0.300405
787	3L	16100401	16100650	peak_19667_Old	FBgn0036569	CG5414	-0.661891	0.0171395	0.301079
847	3L	1203297	1203568	peak_15013_Young	FBgn0063667	CG32335	-0.372887	0.0171408	0.301079
983	3L	9615403	9615842	peak_17746_Young	FBgn0267348	LanB2	-0.241228	0.0170851	0.301079
992	2R	21250915	21251191	peak_12930_Young	FBgn0034606	ASPP	-0.247449	0.0170803	0.301079
1002	2L	2198619	2198873	peak_964_Young	FBgn0085201	CG34172	-0.245411	0.0171408	0.301079
856	2R	22329349	22329608	peak_13339_Mid	FBgn0016053	pgc	0.373951	0.0172038	0.301838
964	3R	28696096	28696970	peak_30277_Young	FBgn0027655	htt	0.272646	0.0172316	0.301978
783	X	18799198	18799447	peak_37837_Young	FBgn0001090	bnb	-0.575381	0.0172842	0.302292
852	2L	10858381	10858644	peak_3803_Young	FBgn0027363	Stam	0.316896	0.0173089	0.302292
941	X	3968772	3969025	peak_33504_Young	FBgn0029689	CG6428	0.300704	0.0173066	0.302292
795	2R	10026419	10026668	peak_9282_Mid	FBgn0033473	CG12128	0.409444	0.0174026	0.302888
869	3L	1313823	1314358	peak_15067_Young	FBgn0035206	CG9186	-0.322543	0.0173743	0.302888
986	2R	22888771	22889030	peak_13571_Young	FBgn0034794	Gmer	0.265622	0.0174003	0.302888
872	3L	7241711	7241969	peak_16962_Young	FBgn0024542	Neos	0.314629	0.0174504	0.303374
1013	3L	24028326	24028585	peak_22241_Young	FBgn0058045	CG40045	0.284725	0.0174711	0.303389
786	2L	14362314	14362563	peak_4800_Mid	FBgn0015546	spel1	0.559999	0.0175657	0.303796
802	X	5698405	5698667	peak_33916_Young	FBgn0029791	CG4096	-0.452483	0.0175941	0.303796
894	3L	4362909	4363183	peak_16128_Young	FBgn0035534	mRpS6	-0.331381	0.0175845	0.303796
904	3R	13782129	13782391	peak_25587_Young	FBgn0000454	Dip-B	0.309944	0.0175297	0.303796
921	2R	11779459	11779729	peak_9870_Young	FBgn0260007	CG42493	-0.297833	0.0175692	0.303796
791	2L	19416349	19416599	peak_6317_Young	FBgn0053532	lectin-37Da	-0.568206	0.0177167	0.304955
805	3R	10170716	10170971	peak_24580_Mid	FBgn0040238	Best1	0.40697	0.0177211	0.304955
950	X	940677	940931	peak_32265_Young	FBgn0040347	mus81	0.295683	0.0177051	0.304955
796	2L	22756272	22756521	peak_7206_VeryOld	FBgn0058006	CG40006	0.536995	0.0179257	0.305719
810	X	16297387	16297636	peak_37032_Mid	FBgn0030735	CG3632	-0.410632	0.0179038	0.305719
817	2R	25130029	25130304	peak_14500_VeryOld	FBgn0050430	CG30430	0.456427	0.0178396	0.305719
870	3R	7902293	7902795	peak_23819_Mid	FBgn0037529	mRpS9	0.361371	0.0178311	0.305719
909	3L	1618000	1618259	peak_15179_Young	FBgn0035244	ABCB7	0.325471	0.0178898	0.305719
960	2L	13266722	13266985	peak_4420_Young	FBgn0051848	CG31848	0.28756	0.0179085	0.305719
1006	X	9686969	9687230	peak_35116_Young	FBgn0261617	nej	0.262144	0.0178155	0.305719
1023	3R	18299077	18299582	peak_26965_Young	FBgn0024432	Dlc90F	0.237489	0.017918	0.305719
882	2L	5744259	5744567	peak_2083_Young	FBgn0031735	CG11029	-0.349265	0.0180572	0.30591
912	2L	18114387	18114675	peak_5844_Young	FBgn0032665	CG15152	-0.325645	0.0179994	0.30591
954	2L	20084525	20084787	peak_6526_VeryOld	FBgn0263773	fok	0.282393	0.0180182	0.30591
991	2L	19735370	19735864	peak_6428_Young	FBgn0032816	Nf-YB	0.258612	0.0179834	0.30591
993	2L	6907477	6908198	peak_2521_Young	FBgn0031868	Rat1	0.257576	0.0180451	0.30591
1000	X	2609630	2610493	peak_33055_Young	FBgn0011566	Bzd	0.242633	0.0180079	0.30591
911	X	15077776	15078025	peak_36678_Young	FBgn0030608	Lsd-2	-0.338082	0.018081	0.305973
799	2L	8782100	8782349	peak_3167_Young	FBgn0032069	CG9468	-0.593241	0.0181622	0.306489
880	X	16654907	16655167	peak_37152_Young	FBgn0003189	r	-0.326758	0.0181442	0.306489
1078	2R	20533140	20533403	peak_12677_Young	FBgn0034512	CG18067	-0.234018	0.0181717	0.306489
848	X	17857884	17858197	peak_37536_Mid	FBgn0030876	CG6762	0.383024	0.0182475	0.307089
1052	2L	13267194	13267454	peak_4421_Young	FBgn0051848	CG31848	0.231486	0.0182332	0.307089
806	2L	9010420	9010669	peak_3232_Young	FBgn0032087	CG9568	-0.496759	0.0185	0.307186
807	2L	17411304	17411553	peak_5677_Mid	FBgn0032635	CG15141	0.746241	0.0184115	0.307186
815	X	10662708	10662957	peak_35410_Young	FBgn0052673	Rab9E	-0.665991	0.0184949	0.307186
839	2L	9737203	9737476	peak_3470_Young	FBgn0032140	CG13117	-0.405433	0.0183717	0.307186
865	X	4920249	4920806	peak_33763_Mid	FBgn0029736	CG4041	0.396645	0.0183091	0.307186
867	2R	21118185	21118450	peak_12862_Young	FBgn0034588	CG9394	-0.351389	0.0184563	0.307186
913	3R	9679857	9680308	peak_24409_Young	FBgn0028997	nmdyn-D7	0.330632	0.0185131	0.307186
940	3L	18845353	18845643	peak_20561_Young	FBgn0036816	Indy	-0.347642	0.0183307	0.307186
1010	3R	20635289	20635547	peak_27693_Young	FBgn0038816	Lrrk	0.266989	0.0185149	0.307186
1017	3R	27070059	27070316	peak_29766_Young	FBgn0003495	spz	0.282624	0.0184231	0.307186
1024	2R	17108763	17109028	peak_11552_Young	FBgn0034194	CG15611	0.261792	0.0183171	0.307186
1068	2R	7012048	7012305	peak_8079_Young	FBgn0029506	Tsp42Ee	0.2234	0.0183929	0.307186
1097	2R	2565310	2565580	peak_7336_Young	FBgn0058263	MFS17	0.301363	0.0184275	0.307186
863	2R	8906871	8907126	peak_8868_Young	FBgn0050349	CG30349	-0.350358	0.0185902	0.307767
1066	3L	17846418	17846672	peak_20267_Young	FBgn0036762	CG7430	0.247793	0.0185705	0.307767
997	3L	12471384	12472164	peak_18600_Young	FBgn0036286	CG10616	0.272352	0.0186956	0.309177
1021	X	4909802	4910080	peak_33754_Young	FBgn0052772	CG32772	0.274897	0.0187208	0.309258
933	2R	25085469	25085721	peak_14480_Young	FBgn0004919	gol	0.310692	0.0187433	0.309295
811	X	8082420	8082669	peak_34621_Young	FBgn0029994	CG2254	-0.533018	0.0187883	0.309703
824	2L	14801745	14801994	peak_4967_Young	FBgn0250834	CG33308	-0.598247	0.0191154	0.309768
871	3L	21983736	21984283	peak_21723_Young	FBgn0000045	Act79B	-0.382325	0.0189541	0.309768
875	3R	31134131	31134390	peak_31183_Mid	FBgn0013973	Gycbeta100B	0.374735	0.0190635	0.309768
879	2R	7148549	7148814	peak_8140_Young	FBgn0003090	pk	-0.377381	0.0189282	0.309768
887	3R	26452663	26452951	peak_29536_Mid	FBgn0039427	CG5447	0.327032	0.0189864	0.309768
928	2L	4882975	4883465	peak_1802_Mid	FBgn0031643	CG3008	0.288927	0.0190175	0.309768
944	X	22487036	22487294	peak_38886_Young	FBgn0027279	l(1)G0196	-0.329031	0.0190685	0.309768
965	3L	6189005	6189260	peak_16645_Young	FBgn0035691	CG7386	0.282308	0.0190159	0.309768
1016	3L	1204302	1204595	peak_15015_Young	FBgn0035189	CG9119	-0.272386	0.0191341	0.309768
1027	3L	7808820	7809081	peak_17138_Young	FBgn0052369	CG32369	-0.265066	0.0189295	0.309768
1045	2L	21573242	21573496	peak_6964_Young	FBgn0032949	Lamp1	0.251746	0.0189515	0.309768
1051	X	15578060	15578338	peak_36823_Young	FBgn0030658	CG7872	0.252679	0.018983	0.309768
1054	3R	24105689	24105943	peak_28824_Young	FBgn0013343	Syx1A	0.24026	0.0190879	0.309768
1063	3L	3325375	3326080	peak_15781_Young	FBgn0035438	PHGPx	0.242539	0.0190617	0.309768
1073	2R	24743652	24743906	peak_14332_Young	FBgn0050421	CG30421	0.271593	0.0191373	0.309768
1075	3R	19226535	19226792	peak_27255_Young	FBgn0262468	vib	0.252139	0.0189163	0.309768
1079	3R	25881336	25881592	peak_29384_Young	FBgn0039381	SppL	0.259228	0.019131	0.309768
1014	3L	9381640	9381903	peak_17662_Young	FBgn0001224	Hsp23	-0.276977	0.0191766	0.310076
823	X	15097659	15097908	peak_36687_Young	FBgn0030614	CG9072	-0.636953	0.0192875	0.310418
953	3R	11221333	11221588	peak_24845_Young	FBgn0020910	RpL3	0.299568	0.0192776	0.310418
998	2L	18119556	18119812	peak_5846_Young	FBgn0032666	CG5758	0.300888	0.0193288	0.310418
1019	X	1909363	1909874	peak_32739_Young	FBgn0023510	Rbcn-3B	-0.287737	0.0193401	0.310418
1093	2R	22798941	22799194	peak_13534_Young	FBgn0011211	blw	0.235287	0.0193103	0.310418
1096	3R	17811351	17811603	peak_26846_Young	FBgn0261649	tinc	0.258733	0.019251	0.310418
1171	2L	480800	481056	peak_319_Young	FBgn0043364	cbt	0.21528	0.0192403	0.310418
821	2R	19364289	19364605	peak_12265_Young	FBgn0034437	CG10051	-0.559697	0.0193854	0.310492
837	3R	19388778	19389027	peak_27303_Young	FBgn0038700	CG3734	-0.674602	0.019375	0.310492
1012	X	18277089	18277356	peak_37655_Young	FBgn0053542	upd3	-0.318539	0.019437	0.310993
841	2L	13182477	13182740	peak_4399_Young	FBgn0032478	CG5458	-0.429978	0.0195613	0.312654
835	3R	20020324	20020573	peak_27525_Young	FBgn0243511	psidin	-0.614284	0.0197166	0.3128
890	3R	22447433	22447682	peak_28282_Young	FBgn0085405	CG34376	-0.358081	0.0197687	0.3128
922	2R	16159013	16159295	peak_11240_Young	FBgn0034082	CG10734	-0.411734	0.0197716	0.3128
968	2R	16579609	16579863	peak_11383_Young	FBgn0016131	Cdk4	-0.291467	0.0196486	0.3128
999	2L	10856239	10856757	peak_3800_Young	FBgn0027363	Stam	0.285099	0.0197712	0.3128
1007	3L	5509650	5509922	peak_16442_Young	FBgn0085371	CG34342	0.339943	0.0197492	0.3128
1033	3R	21101615	21101871	peak_27847_Young	FBgn0038855	CG5745	0.262857	0.0197153	0.3128
1049	3R	17681640	17681899	peak_26790_Young	FBgn0038536	CG7655	-0.264547	0.0196966	0.3128
1121	3R	27263948	27264204	peak_29818_Young	FBgn0039504	CG14260	0.249654	0.0197746	0.3128
1122	2L	2365193	2365444	peak_1021_Young	FBgn0261647	Axud1	0.231121	0.0197959	0.3128
1132	3R	20253094	20253399	peak_27575_Young	FBgn0262582	cic	0.244144	0.0197765	0.3128
833	2R	24499607	24499939	peak_14238_Young	FBgn0015300	Ssl	-0.517112	0.0198207	0.312861
1001	2L	12822699	12822990	peak_4293_Young	FBgn0015399	kek1	0.308234	0.0198407	0.312861
834	2R	20778385	20778683	peak_12747_Young	FBgn0263848	CG43709	-0.623888	0.0198853	0.313034
1005	X	8114857	8115117	peak_34635_Young	FBgn0029999	CG1575	-0.289516	0.0199158	0.313034
1064	2R	22479194	22479447	peak_13403_Young	FBgn0034733	CG4752	-0.295166	0.0199417	0.313034
1087	X	11807394	11807667	peak_35780_Young	FBgn0001218	Hsc70-3	-0.280273	0.0199316	0.313034
1090	2R	24869671	24870171	peak_14388_Young	FBgn0265193	Atf-2	0.247498	0.0199543	0.313034
1035	3R	17078036	17078294	peak_26636_Young	FBgn0038476	kuk	-0.314236	0.0200014	0.313451
1036	2R	6714596	6714942	peak_7945_Young	FBgn0033095	CG3409	-0.325913	0.0200945	0.313942
1081	3L	7125449	7125704	peak_16924_Young	FBgn0035741	BBS1	0.268313	0.0200601	0.313942
1100	3R	30388051	30388337	peak_30914_Old	FBgn0015221	Fer2LCH	0.238011	0.0200875	0.313942
1042	X	8464305	8464828	peak_34733_Young	FBgn0014032	Sptr	-0.283556	0.0201986	0.315247
1109	2R	9284986	9285242	peak_9025_Young	FBgn0033401	CG1968	0.233898	0.0202867	0.316298
967	2R	11293067	11293317	peak_9697_Mid	FBgn0050033	CG30033	0.32164	0.0203521	0.316994
1056	X	17244901	17245156	peak_37345_Young	FBgn0030833	CG8915	0.291673	0.0203741	0.317013
845	2L	12027232	12027481	peak_4099_Young	FBgn0010497	dmGlut	-0.507618	0.0204777	0.317518
846	X	10488185	10488440	peak_35337_Young	FBgn0052687	CG32687	-0.47472	0.0204576	0.317518
1008	3L	3197048	3197326	peak_15740_Young	FBgn0035416	gry	-0.459012	0.0204898	0.317518
1047	3R	4215393	4215889	peak_22493_Mid	FBgn0037217	CG14636	0.281293	0.0204373	0.317518
1074	2R	22242784	22243040	peak_13304_Young	FBgn0020307	dve	0.275082	0.0205454	0.318057
1028	2L	20104570	20104837	peak_6536_Young	FBgn0032851	CG13970	0.286724	0.0206211	0.318644
1162	X	2447834	2448332	peak_32991_Young	FBgn0004050	z	0.229387	0.020625	0.318644
866	3R	27441112	27441361	peak_29885_Young	FBgn0263401	CG43447	-0.764393	0.0206993	0.319145
1048	X	4530015	4530275	peak_33655_Young	FBgn0029708	CG3556	0.307419	0.0206791	0.319145
947	2R	22829079	22829521	peak_13547_Young	FBgn0050272	CG30272	-0.331058	0.020776	0.319852
1029	X	1513644	1514248	peak_32554_Young	FBgn0025393	CG14795	-0.312606	0.020787	0.319852
858	2L	5587249	5587498	peak_2035_Young	FBgn0031723	CG7251	-0.595719	0.0209152	0.320211
910	X	6678294	6678562	peak_34217_VeryOld	FBgn0028336	l(1)G0255	-0.361521	0.0208427	0.320211
917	3L	8185882	8186166	peak_17283_Young	FBgn0035849	ERR	-0.42701	0.0208923	0.320211
989	2L	9431295	9431551	peak_3346_Young	FBgn0011232	scat	0.329652	0.0209072	0.320211
1295	2L	6082981	6083419	peak_2224_Young	FBgn0266450	Kr-h1	0.207017	0.0208829	0.320211
1046	X	12744025	12744285	peak_36017_Old	FBgn0030418	CG4004	-0.300154	0.0209725	0.32053
1115	2L	16716029	16716289	peak_5492_Young	FBgn0086907	Cyt-c-d	-0.262985	0.0209781	0.32053
927	2R	7789026	7789287	peak_8417_Young	FBgn0033221	CG12825	-0.38304	0.0211413	0.321095
973	2L	16799627	16799888	peak_5536_Young	FBgn0040260	Ugt36Bc	-0.33998	0.0210806	0.321095
1011	2R	16110317	16110579	peak_11219_Young	FBgn0034075	Asph	0.290333	0.02113	0.321095
1135	2R	9959655	9960155	peak_9262_Young	FBgn0033466	Pal1	0.254834	0.0211247	0.321095
1172	3L	12266716	12267223	peak_18555_Young	FBgn0052100	CG32100	0.229881	0.0211236	0.321095
1217	2L	13165392	13165649	peak_4392_Young	FBgn0024291	Sir2	0.235967	0.0211261	0.321095
1111	2R	10263816	10264071	peak_9373_Young	FBgn0033502	CG12910	-0.258564	0.0211631	0.321107
1133	2R	4788569	4788824	peak_7459_Young	FBgn0250830	CG12547	0.256918	0.0212657	0.322344
931	2L	16902096	16902360	peak_5571_Mid	FBgn0051805	CG31805	0.351252	0.0213377	0.323114
959	3L	7911394	7911669	peak_17174_Young	FBgn0035824	CG8281	0.321806	0.02137	0.323283
873	2L	6632433	6632699	peak_2423_Young	FBgn0051634	Oatp26F	-0.511463	0.0214349	0.323622
1157	3L	11648339	11648857	peak_18348_Young	FBgn0036188	CG7339	0.235027	0.0214219	0.323622
976	2L	2987982	2988236	peak_1211_Young	FBgn0025109	Bem46	-0.321409	0.0214614	0.323702
923	2L	811463	811731	peak_456_Mid	FBgn0051658	Nnf1b	0.358727	0.021509	0.3241
876	3L	6399845	6400094	peak_16736_Young	FBgn0261801	CG42747	-0.535734	0.0216128	0.324887
878	X	8458110	8458359	peak_34727_Young	FBgn0052713	CG32713	-0.534512	0.021644	0.324887
938	X	23068103	23068378	peak_39100_Young	FBgn0039941	CG17167	-0.395716	0.0216677	0.324887
1069	2R	22180007	22180317	peak_13277_VeryOld	FBgn0034706	CG11275	-0.295126	0.0216351	0.324887
1158	2R	14481045	14481307	peak_10685_Young	FBgn0001332	L	0.244865	0.0216546	0.324887
914	2L	14013525	14013798	peak_4666_Young	FBgn0027348	bgm	-0.408636	0.0217076	0.324992
1124	3R	4428614	4428870	peak_22590_Young	FBgn0037248	srl	-0.256605	0.0217619	0.324992
1163	3L	4134434	4134691	peak_16061_Young	FBgn0264693	ens	0.241873	0.021726	0.324992
1167	2R	13502731	13502985	peak_10369_Young	FBgn0004638	drk	0.251398	0.0217811	0.324992
1174	3R	19402985	19403236	peak_27307_Young	FBgn0038704	CG5316	0.259249	0.0217772	0.324992
881	X	20327709	20327998	peak_38392_Young	FBgn0031101	CG1631	-0.527849	0.0218194	0.325156
1030	2R	17781551	17782065	peak_11788_Young	FBgn0028741	fab1	-0.362915	0.0218347	0.325156
1032	3R	12406797	12407076	peak_25213_Mid	FBgn0038038	CG5167	0.382969	0.021919	0.325758
1175	3L	4541604	4541859	peak_16194_Young	FBgn0035558	CG11357	0.272989	0.0219391	0.325758
1262	X	3811437	3811695	peak_33440_Young	FBgn0000542	ec	0.235172	0.0219294	0.325758
1119	3R	18199722	18199976	peak_26929_Young	FBgn0011481	Ssdp	0.254585	0.021972	0.325929
889	3R	20772728	20772977	peak_27735_Old	FBgn0046689	Takl1	-0.612251	0.0219981	0.325999
945	X	19129039	19129309	peak_37953_Mid	FBgn0030984	tgy	0.35363	0.022085	0.326434
1089	3R	5588226	5588480	peak_23076_Young	FBgn0037344	CG2926	-0.290628	0.0220603	0.326434
1156	2L	20735451	20735716	peak_6696_Young	FBgn0262743	Fs(2)Ket	0.266625	0.0220916	0.326434
1192	2L	22536596	22536861	peak_7185_Young	FBgn0064225	RpL5	0.261802	0.0221152	0.326466
886	2R	21971466	21971715	peak_13191_Mid	FBgn0034674	CG9304	0.489456	0.022233	0.326636
888	3L	11767638	11767887	peak_18385_Young	FBgn0036202	CG6024	-0.598617	0.0222151	0.326636
962	3L	8912340	8912636	peak_17546_Young	FBgn0035936	Tsp66E	-0.369398	0.0222015	0.326636
974	X	295146	295406	peak_32007_Young	FBgn0040370	CG13375	0.324567	0.0222854	0.326636
1004	X	20137698	20138355	peak_38349_Young	FBgn0260873	CG42583	-0.316736	0.0223192	0.326636
1009	3L	1189407	1189656	peak_15006_Old	FBgn0035186	CG13912	-0.313805	0.0222867	0.326636
1038	3L	15620108	15620377	peak_19513_Young	FBgn0036522	CG7372	0.297538	0.0223193	0.326636
1070	3L	1318300	1318557	peak_15068_Young	FBgn0010246	Myo61F	-0.303897	0.0221795	0.326636
1154	2L	3872362	3872618	peak_1508_Young	FBgn0051957	CG31957	0.277553	0.0222375	0.326636
1247	3L	8997973	8998229	peak_17576_Young	FBgn0016070	smg	0.244775	0.0224302	0.327945
1043	3L	15141743	15141996	peak_19364_Mid	FBgn0014002	Pdi	0.330667	0.0224837	0.328099
1106	2R	5671599	5671851	peak_7545_Young	FBgn0033032	kune	0.269359	0.0224751	0.328099
891	X	10626087	10626336	peak_35401_Mid	FBgn0052677	X11Lbeta	0.535205	0.0225173	0.328276
895	2R	17409202	17409451	peak_11648_Young	FBgn0034210	CG6568	-0.653723	0.0225677	0.328695
898	X	22632625	22632874	peak_38924_Young	FBgn0052499	Cda4	-0.522804	0.022806	0.328889
899	2R	8005569	8005964	peak_8501_Old	FBgn0013307	Odc1	-0.536055	0.0228519	0.328889
900	X	16063912	16064194	peak_36978_Old	FBgn0030723	dpr18	0.492097	0.0226726	0.328889
901	3R	24389595	24389844	peak_28932_Young	FBgn0039198	CG5768	-0.700984	0.0226268	0.328889
902	3L	8806024	8806354	peak_17514_Young	FBgn0052024	CG32024	-0.49458	0.0228085	0.328889
903	X	18179074	18179323	peak_37616_Young	FBgn0030898	Andorra	-0.586614	0.0229053	0.328889
907	3R	23095910	23096159	peak_28474_Young	FBgn0039052	CG6733	-0.665457	0.0229257	0.328889
926	2R	11346169	11346563	peak_9720_Young	FBgn0010357	betaTry	-0.44157	0.0226036	0.328889
982	X	18440177	18440674	peak_37713_Young	FBgn0264393	CG43841	-0.346612	0.0226544	0.328889
1077	2R	21057623	21057887	peak_12836_Young	FBgn0003391	shg	-0.310505	0.0227388	0.328889
1092	X	19494317	19494566	peak_38098_Mid	FBgn0027621	Pfrx	0.29783	0.0228027	0.328889
1114	X	15934159	15934427	peak_36956_Young	FBgn0053180	Ranbp16	0.268766	0.0228865	0.328889
1118	X	21045094	21045347	peak_38604_Young	FBgn0031148	Cbs	-0.29857	0.0227852	0.328889
1238	2L	2242192	2242450	peak_985_Young	FBgn0264979	CG4267	-0.237288	0.0228719	0.328889
1240	2L	6821734	6822010	peak_2499_Young	FBgn0051632	sens-2	0.228254	0.0228159	0.328889
1275	2L	6338668	6338921	peak_2327_Young	FBgn0015623	Cpr	0.231357	0.0228443	0.328889
990	2L	19484343	19484852	peak_6350_Young	FBgn0032788	CG13084	-0.33349	0.0229816	0.329073
1185	2R	16007284	16007821	peak_11178_Young	FBgn0034063	CG8389	0.243944	0.0229815	0.329073
1170	2L	6562190	6562447	peak_2413_Young	FBgn0263916	Ent2	0.247899	0.0230067	0.329124
988	3R	8748519	8748799	peak_24094_Young	FBgn0037623	CG9801	-0.361698	0.0230808	0.329483
1198	2R	12884385	12884637	peak_10180_Young	FBgn0003975	vg	0.251372	0.0230995	0.329483
1213	3R	6657323	6657578	peak_23483_Young	FBgn0262801	twr	0.255725	0.0230719	0.329483
1227	2R	6715734	6715987	peak_7948_Young	FBgn0033095	CG3409	0.230689	0.0231182	0.329483
996	2R	4013278	4013551	peak_7378_Young	FBgn0046706	Haspin	0.383177	0.0232257	0.330398
1232	X	18864179	18864432	peak_37867_Young	FBgn0085430	CG34401	-0.290424	0.023222	0.330398
956	3R	25320489	25320772	peak_29219_Young	FBgn0039325	CG10560	-0.389355	0.023265	0.330649
908	2L	18005263	18005515	peak_5811_Young	FBgn0040989	CG5693	-0.594844	0.023326	0.330783
969	2L	18114058	18114369	peak_5843_Young	FBgn0032665	CG15152	-0.363951	0.0233394	0.330783
1040	X	13624268	13624531	peak_36228_Young	FBgn0030505	NFAT	0.304598	0.0233284	0.330783
1094	3L	15158468	15158725	peak_19373_Young	FBgn0036487	Prp31	0.29441	0.0233828	0.331089
920	3R	8033538	8033787	peak_23872_Mid	FBgn0010812	unc-45	0.468061	0.0235546	0.332635
935	2L	10477826	10478076	peak_3696_Young	FBgn0032256	RluA-2	-0.417587	0.0235193	0.332635
1059	3R	23279179	23279432	peak_28538_Young	FBgn0025781	Cdc16	0.3301	0.0235791	0.332635
1197	3R	24270167	24270425	peak_28885_Young	FBgn0011225	jar	-0.277615	0.0235672	0.332635
1020	X	6600630	6600892	peak_34191_Young	FBgn0029881	pigs	-0.346709	0.0236475	0.332984
1234	2R	20587951	20588202	peak_12690_Young	FBgn0267791	bl	0.231261	0.0236317	0.332984
934	X	17698673	17698922	peak_37489_Young	FBgn0263258	chas	-0.460701	0.0237446	0.333795
985	3L	22749290	22749554	peak_22097_Mid	FBgn0052451	SPoCk	0.422063	0.0237707	0.333795
1057	3L	19260262	19260562	peak_20703_Mid	FBgn0260857	Bet1	0.316619	0.0237551	0.333795
1152	2R	6645746	6646028	peak_7907_Young	FBgn0033079	Fmo-2	-0.280179	0.0237937	0.333812
1091	2L	16310607	16311072	peak_5370_Young	FBgn0001086	fzy	-0.289107	0.0238833	0.334761
1025	X	8907459	8907715	peak_34859_Young	FBgn0261549	rdgA	0.344886	0.0239671	0.335627
1317	3R	17135793	17136058	peak_26663_Young	FBgn0038484	CG5246	0.23808	0.0240667	0.336714
929	2L	2739245	2739494	peak_1107_Mid	FBgn0031450	Hrs	0.568988	0.0241505	0.337268
1195	3L	9511433	9511687	peak_17729_Young	FBgn0010408	RpS9	0.252262	0.024148	0.337268
1293	2L	158865	159120	peak_177_Young	FBgn0016977	spen	0.225043	0.0242626	0.338523
937	2L	11154900	11155149	peak_3881_Young	FBgn0032350	CG6287	-0.549685	0.0244586	0.339495
939	2L	5970730	5970993	peak_2161_Young	FBgn0031758	Ucp4B	-0.521687	0.0244575	0.339495
994	2L	8198804	8199059	peak_2949_Young	FBgn0031997	PGAP5	0.410459	0.0244809	0.339495
995	X	10384733	10385009	peak_35301_Mid	FBgn0000711	flw	0.375041	0.0243908	0.339495
1018	2R	22220840	22221124	peak_13296_Young	FBgn0050277	Oatp58Da	-0.405959	0.0244031	0.339495
1188	3R	28810958	28811216	peak_30318_Young	FBgn0039600	CG1646	0.260474	0.024488	0.339495
1278	4	179327	179588	peak_31626_Young	FBgn0039889	Arl4	0.268964	0.0244224	0.339495
980	3R	19880674	19880936	peak_27470_Young	FBgn0014006	Pk92B	-0.373968	0.0245305	0.339776
1212	2R	21613012	21613274	peak_13062_Old	FBgn0034639	CG15673	0.262274	0.0245928	0.340088
1229	X	13383903	13384164	peak_36190_Young	FBgn0030480	Tim9a	-0.24393	0.0245976	0.340088
1230	2L	11123430	11123916	peak_3871_Young	FBgn0262647	Nup160	0.242949	0.0246658	0.340415
1303	X	19069579	19069841	peak_37934_Young	FBgn0085359	CG34330	-0.253649	0.0246534	0.340415
1099	3L	2265738	2266001	peak_15412_Mid	FBgn0035325	CG13806	0.349076	0.0247568	0.340924
1209	3R	4395333	4395588	peak_22573_Young	FBgn0086608	CG34112	-0.260986	0.0247697	0.340924
1294	3R	5464090	5464873	peak_23018_Young	FBgn0037327	PEK	0.220363	0.0247407	0.340924
1108	3L	8447742	8448049	peak_17366_Young	FBgn0010825	Gug	-0.344396	0.0249355	0.342588
1142	2R	10557523	10557775	peak_9485_Young	FBgn0263102	psq	-0.312584	0.0249214	0.342588
951	2R	11338636	11338885	peak_9712_Young	FBgn0043471	kappaTry	-0.552875	0.0250041	0.342606
958	3R	12236403	12236652	peak_25154_Young	FBgn0038006	Cyp313a2	-0.618389	0.0249927	0.342606
1225	2L	155998	156252	peak_176_Young	FBgn0031229	CG3436	0.26256	0.0250009	0.342606
961	X	4997917	4998166	peak_33787_Young	FBgn0029740	CG12680	-0.70366	0.0250388	0.342773
1076	2R	7938997	7939258	peak_8469_Mid	FBgn0033235	CG8728	0.322206	0.0251147	0.343504
1053	2R	24059550	24059808	peak_14031_Young	FBgn0034968	RpL12	-0.354834	0.0252088	0.343867
1201	3R	30039145	30039841	peak_30780_Young	FBgn0003510	Sry-alpha	0.254767	0.0252037	0.343867
1363	X	20510614	20510872	peak_38468_Young	FBgn0031119	CG1812	0.222827	0.025205	0.343867
1248	2L	19444903	19445159	peak_6336_Young	FBgn0024230	Hs2st	0.265861	0.0252652	0.344329
972	3R	30191181	30191449	peak_30846_Young	FBgn0039754	CG9747	-0.426456	0.0253107	0.344641
963	2L	17016430	17016679	peak_5588_Young	FBgn0032624	CG6304	-0.568521	0.0253955	0.345347
978	3L	5583814	5584063	peak_16463_Mid	FBgn0035617	l(3)psg2	0.42446	0.0255152	0.345347
1041	2L	13190575	13190849	peak_4401_Young	FBgn0032480	Edem2	-0.348811	0.0255209	0.345347
1129	2R	6987471	6987720	peak_8073_Young	FBgn0022960	vimar	-0.340268	0.0255107	0.345347
1220	3R	20534647	20534904	peak_27647_Young	FBgn0053192	MtnD	-0.281291	0.0254902	0.345347
1296	2R	5701938	5702193	peak_7561_Young	FBgn0259978	vlc	0.242398	0.0254913	0.345347
1315	X	10385790	10386046	peak_35303_Young	FBgn0000711	flw	0.245787	0.0254502	0.345347
1370	2R	18536488	18536756	peak_12009_Young	FBgn0266488	CG45087	-0.234454	0.0255569	0.345528
1243	X	20173776	20174035	peak_38363_Young	FBgn0000084	AnxB10	-0.278658	0.0256496	0.345861
1354	X	927967	928217	peak_32260_Young	FBgn0040339	MED22	0.239793	0.0256402	0.345861
1396	2L	871352	871855	peak_488_Young	FBgn0053526	PNUTS	0.213199	0.0256198	0.345861
1144	2R	10100002	10100253	peak_9314_Mid	FBgn0004907	14-3-3zeta	0.282645	0.0256902	0.346103
970	3L	6489510	6489759	peak_16764_Young	FBgn0035703	CG8270	-0.66505	0.0257215	0.346219
966	3L	9490557	9490837	peak_17715_Young	FBgn0052036	CG32036	-0.616937	0.0258195	0.346699
1187	3L	11776845	11777119	peak_18389_Young	FBgn0036205	CG14131	-0.337534	0.0258231	0.346699
1390	2L	21237671	21238137	peak_6915_Young	FBgn0261239	Hr39	-0.24569	0.0258253	0.346699
975	2L	8448817	8449066	peak_3045_Young	FBgn0027780	U26	-0.544934	0.0263173	0.34681
977	3L	16328981	16329230	peak_19756_Young	FBgn0036610	CG13058	-0.609178	0.0261414	0.34681
979	3L	17254288	17254537	peak_20082_Young	FBgn0036704	CG6497	-0.47205	0.025899	0.34681
981	2L	1497837	1498086	peak_742_Young	FBgn0051661	CG31661	-0.523517	0.0264895	0.34681
984	2L	11655597	11655846	peak_3998_Young	FBgn0262786	CG43167	-0.602361	0.026424	0.34681
987	X	22450560	22450809	peak_38864_Young	FBgn0014395	tilB	-0.488073	0.0262433	0.34681
1061	2R	11397685	11397946	peak_9744_Young	FBgn0082585	sprt	-0.339489	0.0260956	0.34681
1065	3L	9370860	9371149	peak_17656_Mid	FBgn0001228	Hsp67Bb	0.353942	0.0265107	0.34681
1071	2R	5307398	5307672	peak_7506_VeryOld	FBgn0261403	sxc	0.353553	0.0259953	0.34681
1072	2R	25226384	25226645	peak_14524_Young	FBgn0001325	Kr	-0.399336	0.0265515	0.34681
1080	2R	21199837	21200103	peak_12912_Young	FBgn0265180	CG44245	-0.402242	0.026606	0.34681
1147	2R	18172009	18172296	peak_11899_Young	FBgn0034312	CG10916	-0.310999	0.0264932	0.34681
1160	2L	5055344	5055694	peak_1865_Young	FBgn0014857	His3.3A	0.294274	0.0265053	0.34681
1169	2L	4227569	4227821	peak_1612_Young	FBgn0003941	RpL40	0.298466	0.0263588	0.34681
1180	X	8152764	8153021	peak_34651_Young	FBgn0030012	CG18262	-0.312115	0.0262168	0.34681
1215	2R	22122764	22123017	peak_13254_Old	FBgn0002715	mei-S332	0.268929	0.0264304	0.34681
1219	2R	7419108	7419378	peak_8251_Young	FBgn0003460	so	-0.278335	0.0259906	0.34681
1254	3L	7641549	7641801	peak_17085_Young	FBgn0053276	CG33276	0.264484	0.0260736	0.34681
1266	2R	9693569	9693831	peak_9171_Young	FBgn0023143	Uba1	0.259173	0.0262522	0.34681
1273	2L	19958559	19958818	peak_6491_Young	FBgn0032833	CoIV	0.274214	0.0258814	0.34681
1297	2R	5604748	5605008	peak_7532_Young	FBgn0039969	Fis1	0.247346	0.0265311	0.34681
1298	2L	18155895	18156160	peak_5867_Young	FBgn0032670	CG5783	-0.264249	0.0261944	0.34681
1302	2L	21573543	21573799	peak_6965_Young	FBgn0032949	Lamp1	0.249724	0.0262969	0.34681
1320	3R	21520787	21521041	peak_27992_Young	FBgn0038890	CG7956	0.241708	0.0263152	0.34681
1323	2R	17543881	17544169	peak_11700_Young	FBgn0028382	cyp33	-0.313532	0.0264339	0.34681
1327	X	8709488	8709764	peak_34816_Young	FBgn0041629	Hexo2	-0.25415	0.0262741	0.34681
1333	3R	5217342	5217592	peak_22929_Young	FBgn0259212	cno	0.232608	0.0265745	0.34681
1334	3R	32052477	32052731	peak_31584_Young	FBgn0002780	mod	0.235092	0.0262116	0.34681
1353	3L	23338012	23338274	peak_22211_Young	FBgn0052230	CG32230	0.245485	0.0264009	0.34681
1382	X	12654229	12654498	peak_35977_Young	FBgn0015024	CkIalpha	-0.240697	0.0261448	0.34681
1393	3L	7719504	7719779	peak_17115_Young	FBgn0035811	CG12262	0.229152	0.0265842	0.34681
1402	2L	131825	132082	peak_165_Young	FBgn0001142	Gs1	0.235355	0.0263659	0.34681
1433	X	13823881	13824149	peak_36313_Young	FBgn0030529	Clic	0.245551	0.0264437	0.34681
1445	3R	14740697	14740963	peak_25881_Young	FBgn0263929	jvl	0.203009	0.0262562	0.34681
1050	2R	15923162	15923564	peak_11147_VeryOld	FBgn0264089	sli	-0.389209	0.0266336	0.346873
1086	3L	1731272	1731530	peak_15227_Mid	FBgn0027594	drpr	0.335246	0.0267176	0.347374
1330	X	18512357	18512625	peak_37737_Young	FBgn0030932	Ggt-1	0.274813	0.0267087	0.347374
1088	3R	6286557	6286836	peak_23358_Young	FBgn0037421	CG15594	-0.377866	0.0267684	0.347622
1321	3R	5393785	5394040	peak_23002_Young	FBgn0264712	CG1172	0.266963	0.0267822	0.347622
1191	2L	12455149	12455449	peak_4192_Young	FBgn0032436	CG5418	-0.338436	0.0268274	0.347912
1224	3L	5565457	5565985	peak_16455_Young	FBgn0040239	bc10	0.294417	0.0269728	0.349502
1003	2L	13923446	13923695	peak_4632_Young	FBgn0028938	CG16886	-0.597954	0.0270121	0.349714
1026	3L	6550553	6550810	peak_16784_Young	FBgn0042185	CG18769	-0.46869	0.0271086	0.349824
1112	3R	24163190	24163669	peak_28847_Young	FBgn0026598	Apc2	-0.364642	0.0271122	0.349824
1239	X	15450440	15450707	peak_36766_Young	FBgn0014455	Ahcy13	-0.291893	0.0270602	0.349824
1438	3R	30889002	30889256	peak_31101_Young	FBgn0000416	Sap-r	0.231453	0.027068	0.349824
1137	X	16610805	16611058	peak_37135_Young	FBgn0025743	mbt	-0.326931	0.0271933	0.350573
1149	3L	16594714	16595218	peak_19839_Young	FBgn0042178	CG32165	-0.309988	0.0272551	0.351073
1432	2L	14234008	14234268	peak_4743_Young	FBgn0016930	Dyrk2	0.261281	0.0274052	0.352709
1216	2L	14348328	14348945	peak_4794_Young	FBgn0028530	mTTF	-0.298331	0.0274488	0.352734
1233	3L	17622948	17623211	peak_20203_Old	FBgn0036740	Vps60	0.265597	0.0274534	0.352734
1269	X	2336387	2336653	peak_32937_Young	FBgn0044047	Ilp6	-0.291795	0.0275244	0.353012
1279	3L	21225769	21226018	peak_21421_Young	FBgn0004865	Eip78C	-0.293439	0.0275347	0.353012
1342	X	2145687	2145958	peak_32841_Young	FBgn0004654	Pgd	-0.32259	0.0275443	0.353012
1116	3R	11352378	11352627	peak_24874_Young	FBgn0026063	KP78b	-0.417186	0.0275871	0.353264
1318	X	654146	654401	peak_32135_Young	FBgn0025637	SkpA	0.258491	0.0276385	0.353328
1349	2L	810425	810963	peak_455_Young	FBgn0051658	Nnf1b	0.243125	0.0276363	0.353328
1276	2L	5802104	5802363	peak_2104_Young	FBgn0031740	CG7239	0.291207	0.0277267	0.354071
1308	2L	117831	118091	peak_157_Young	FBgn0031219	CG13694	0.340033	0.027743	0.354071
1134	3R	26461958	26462207	peak_29538_Young	FBgn0039430	CG5455	-0.322593	0.0277866	0.354331
1301	2R	22317244	22317493	peak_13332_Mid	FBgn0013272	Gp150	0.267459	0.0278106	0.354342
1146	3L	21808536	21808815	peak_21658_Young	FBgn0000560	eg	-0.319615	0.0278473	0.354514
1031	2L	9427426	9427675	peak_3344_Young	FBgn0000640	Fbp2	-0.636482	0.0280907	0.356387
1221	2L	9707516	9707804	peak_3460_Young	FBgn0051710	CG31710	-0.408083	0.0281057	0.356387
1417	3L	26013636	26013890	peak_22323_Young	FBgn0058178	CG40178	0.27868	0.028032	0.356387
1476	3L	9072108	9072836	peak_17591_Young	FBgn0023479	Tequila	0.212083	0.0280869	0.356387
1525	2R	24642242	24642508	peak_14293_Young	FBgn0035043	CG4781	0.206046	0.0281112	0.356387
1034	2R	19269650	19269899	peak_12228_Mid	FBgn0003254	rib	0.526721	0.0282044	0.357272
1300	2R	14605266	14605528	peak_10737_Young	FBgn0003742	tra2	0.255227	0.028287	0.357672
1407	2R	18445752	18446029	peak_11983_Young	FBgn0034350	CG5189	0.239171	0.0283297	0.357672
1415	3L	9004801	9005061	peak_17577_Young	FBgn0035954	Doc3	0.261083	0.0283196	0.357672
1442	2L	9947444	9947705	peak_3519_Young	FBgn0032167	CG5853	-0.263564	0.0282903	0.357672
1267	2R	16322044	16322298	peak_11303_Young	FBgn0034114	CG4282	0.289368	0.0284392	0.358756
1104	3R	8524194	8524548	peak_24012_Young	FBgn0051259	CG31259	-0.37932	0.0284642	0.358776
1037	3L	21667675	21667924	peak_21591_Young	FBgn0037114	Cpr78E	-0.647709	0.0285339	0.35878
1039	2L	21097187	21097436	peak_6862_Young	FBgn0083972	CG34136	-0.608263	0.0286057	0.35878
1123	2L	5526828	5527084	peak_2013_Mid	FBgn0051648	CG31648	0.411994	0.02857	0.35878
1148	2R	19396609	19396885	peak_12285_Mid	FBgn0034443	cer	0.327256	0.0286291	0.35878
1261	X	16440946	16441203	peak_37089_Young	FBgn0030753	rngo	-0.274659	0.0285591	0.35878
1381	X	14238181	14238674	peak_36436_Young	FBgn0030554	CG1434	0.247325	0.028588	0.35878
1441	3R	30600205	30600461	peak_31003_Young	FBgn0051021	CG31021	0.232945	0.0285875	0.35878
1214	3R	15965316	15965576	peak_26288_Young	FBgn0038390	Rbf2	0.283484	0.0287175	0.359298
1570	3L	8675533	8675791	peak_17461_Young	FBgn0001168	h	0.198384	0.0287049	0.359298
1352	3R	25208664	25208928	peak_29167_Young	FBgn0022800	Cad96Ca	-0.271575	0.0287805	0.359792
1044	3R	24932738	24932987	peak_29088_Young	FBgn0039252	CG11771	-0.598629	0.028849	0.359868
1125	3R	31212995	31213251	peak_31202_Mid	FBgn0039828	CG1542	0.380813	0.0288574	0.359868
1478	2R	10427953	10428211	peak_9432_Young	FBgn0262114	RanBPM	-0.220919	0.0288486	0.359868
1414	2L	451958	452244	peak_301_Young	FBgn0031256	CG4164	-0.269523	0.0288915	0.36
1058	2L	10278707	10278956	peak_3614_Mid	FBgn0260749	Utx	0.441085	0.0289296	0.360109
1429	3R	4387584	4387840	peak_22568_Young	FBgn0003882	tub	0.256996	0.0289475	0.360109
1139	3R	14511139	14511417	peak_25811_Young	FBgn0038234	mRpL11	0.336204	0.0289751	0.36016
1325	3R	14801517	14801784	peak_25902_Young	FBgn0038262	CG14857	-0.31131	0.0290425	0.360411
1444	2L	19582109	19582612	peak_6401_Young	FBgn0032814	CG10366	0.23467	0.0290354	0.360411
1095	3R	31053518	31053767	peak_31151_Mid	FBgn0010808	l(3)03670	0.389524	0.0292087	0.36053
1117	2R	7889369	7889618	peak_8450_Young	FBgn0050377	CG30377	-0.364282	0.0292554	0.36053
1131	2R	22401511	22401760	peak_13376_Young	FBgn0034724	babos	-0.397341	0.0292297	0.36053
1138	2L	7665915	7666175	peak_2769_Young	FBgn0040299	Myo28B1	0.36771	0.0290842	0.36053
1166	2L	3145220	3145578	peak_1266_Mid	FBgn0015600	toc	0.359269	0.0292337	0.36053
1222	2L	8371022	8371289	peak_3011_Young	FBgn0032029	CG17292	-0.363244	0.0292488	0.36053
1424	3R	29503430	29503687	peak_30598_Young	FBgn0039668	Trc8	0.230201	0.029176	0.36053
1430	2L	11130595	11130849	peak_3874_Young	FBgn0032348	CG4751	0.236433	0.0291115	0.36053
1468	2R	24669209	24669466	peak_14300_Young	FBgn0035047	Pof	0.224535	0.0292647	0.36053
1085	3L	16865543	16865834	peak_19959_Young	FBgn0261565	Lmpt	-0.396368	0.0293041	0.360723
1176	3R	31978655	31979158	peak_31553_Young	FBgn0039886	CG2003	-0.333483	0.0293776	0.361173
1358	2L	9700690	9700947	peak_3454_Young	FBgn0011207	pelo	0.287078	0.0293879	0.361173
1055	X	20780807	20781056	peak_38532_Young	FBgn0052507	CG32507	-0.538655	0.0295806	0.362957
1398	3R	18199989	18200255	peak_26930_Young	FBgn0011481	Ssdp	0.256937	0.0295622	0.362957
1082	3R	14245264	14245517	peak_25716_Young	FBgn0038214	CG9616	-0.47726	0.0296821	0.363454
1153	2R	11359451	11359762	peak_9729_Young	FBgn0024188	san	0.350982	0.0296719	0.363454
1383	2R	8900122	8900376	peak_8865_Young	FBgn0004921	Ggamma1	0.234059	0.0296926	0.363454
1482	X	21067510	21067768	peak_38618_Young	FBgn0052512	CG32512	-0.273114	0.0297199	0.363497
1062	3R	5753572	5753821	peak_23165_Mid	FBgn0037372	CG2091	0.486109	0.0298437	0.363845
1083	2L	5878705	5878954	peak_2124_Young	FBgn0031745	rau	-0.44652	0.0297835	0.363845
1179	2L	2574503	2574952	peak_1071_Mid	FBgn0026778	Rad1	0.36446	0.0298149	0.363845
1447	2L	1649860	1650117	peak_785_Young	FBgn0086758	chinmo	-0.261101	0.0298218	0.363845
1060	3R	30427437	30427686	peak_30924_Old	FBgn0039768	CG15533	0.500503	0.029891	0.363947
1512	2R	10424159	10424421	peak_9431_Young	FBgn0033520	Prx2540-1	-0.223474	0.0298997	0.363947
1514	3R	28335499	28335751	peak_30122_Young	FBgn0261618	larp	0.221917	0.0300067	0.364958
1413	3L	4318838	4319096	peak_16118_Young	FBgn0052250	CG32250	-0.26449	0.0300479	0.365168
1360	3L	18820245	18820520	peak_20544_Young	FBgn0036814	CG14073	-0.307482	0.0300894	0.365382
1067	3L	11944153	11944402	peak_18440_Young	FBgn0036225	CG5883	-0.556099	0.0301831	0.365659
1199	2R	23858679	23858937	peak_13932_Mid	FBgn0004581	bgcn	0.331419	0.0301841	0.365659
1549	X	18832432	18832692	peak_37854_Young	FBgn0030964	Pvf1	-0.232322	0.0301659	0.365659
1337	2L	13203171	13203425	peak_4404_Mid	FBgn0032482	Pect	0.279761	0.0302511	0.365977
1431	X	17857257	17857744	peak_37535_Young	FBgn0030876	CG6762	0.249266	0.0302583	0.365977
1130	2R	6681803	6682112	peak_7926_Young	FBgn0033090	CG15909	-0.471737	0.0303344	0.366606
1459	3L	4021308	4021560	peak_16020_Young	FBgn0035483	Mul1	0.241434	0.0304075	0.367199
1128	2R	23283116	23283413	peak_13713_Young	FBgn0034841	CG13541	-0.403785	0.0305091	0.367325
1319	3L	17514160	17514661	peak_20159_Young	FBgn0036734	CG7564	-0.284805	0.0305073	0.367325
1367	2L	1723673	1723942	peak_810_Young	FBgn0031359	Rim2	-0.305339	0.0304794	0.367325
1510	3L	13022563	13022826	peak_18762_Young	FBgn0260441	RpS12	0.257792	0.0305142	0.367325
1127	3L	4235052	4235306	peak_16097_Young	FBgn0001257	ImpL2	-0.413486	0.0305655	0.367653
1136	3R	14569113	14569394	peak_25821_VeryOld	FBgn0038243	CG8066	0.387691	0.0306178	0.367992
1372	3R	23996254	23996509	peak_28787_Young	FBgn0051184	LSm3	0.266656	0.0306577	0.368182
1084	2L	6556741	6556990	peak_2408_Young	FBgn0031830	CoVb	-0.557616	0.0307606	0.368258
1311	X	16599101	16599363	peak_37129_Young	FBgn0061200	Nup153	-0.282423	0.0307304	0.368258
1399	2R	22925790	22926174	peak_13585_Young	FBgn0261564	CG42678	-0.232571	0.0307012	0.368258
1502	X	9500504	9500766	peak_35031_Young	FBgn0261260	mgl	0.245025	0.030748	0.368258
1477	3R	16171797	16172053	peak_26378_Young	FBgn0038404	CG8925	0.243944	0.0308184	0.368373
1483	3R	29618635	29618889	peak_30615_Young	FBgn0039674	CG1907	0.266665	0.0308045	0.368373
1497	X	4551556	4552063	peak_33664_Young	FBgn0029714	CG3527	0.235153	0.0308748	0.368759
1539	3R	14121821	14122778	peak_25689_Young	FBgn0038206	twf	0.221722	0.0309708	0.369615
1280	2L	16451044	16451318	peak_5406_Young	FBgn0020414	Idgf3	-0.348681	0.0310348	0.370006
1371	X	1346357	1346612	peak_32455_Young	FBgn0024361	Tsp2A	-0.280641	0.031052	0.370006
1196	X	20091819	20092363	peak_38340_Young	FBgn0031086	fd19B	-0.372457	0.0310831	0.370087
1120	X	4918086	4918346	peak_33759_Mid	FBgn0029737	CG6903	0.408796	0.0312327	0.370137
1203	2L	8376659	8377168	peak_3014_VeryOld	FBgn0032032	CG17294	-0.374393	0.0311335	0.370137
1206	X	9729069	9729337	peak_35119_Mid	FBgn0020378	Sp1	0.377401	0.0311873	0.370137
1331	3R	23346075	23346344	peak_28565_Young	FBgn0264326	DNApol-epsilon255	-0.3352	0.0312208	0.370137
1507	2L	7056190	7056449	peak_2582_Young	FBgn0031885	Mnn1	0.227093	0.0311716	0.370137
1509	X	13237492	13237794	peak_36129_Young	FBgn0052639	CG32639	0.238019	0.0311769	0.370137
1102	3R	27705650	27705899	peak_29975_Young	FBgn0039544	CG12877	-0.479846	0.0313196	0.370303
1309	3L	21539987	21540265	peak_21541_Young	FBgn0028663	VhaM9.7-b	-0.295747	0.0312902	0.370303
1560	3L	9360195	9360662	peak_17653_Young	FBgn0085484	Pdxk	0.206728	0.0313181	0.370303
1435	2L	22981655	22981909	peak_7211_Young	FBgn0000384	cta	0.25153	0.0313581	0.370472
1105	2R	16338366	16338633	peak_11313_Young	FBgn0262511	Vha44	-0.473504	0.0314827	0.370556
1411	3L	14551198	14551453	peak_19186_Young	FBgn0036428	Gbs-70E	-0.260884	0.0314525	0.370556
1416	3L	11120681	11120935	peak_18190_Young	FBgn0036135	mRpL2	0.266299	0.0314866	0.370556
1487	3L	12390574	12390873	peak_18577_Young	FBgn0036279	Ncc69	-0.29367	0.0314751	0.370556
1574	3R	7074679	7074932	peak_23571_Young	FBgn0037468	CG1943	0.210669	0.0314586	0.370556
1098	3R	28753081	28753330	peak_30310_Young	FBgn0039596	CG10000	-0.533576	0.031532	0.370691
1189	2R	10264840	10265089	peak_9374_Young	FBgn0033502	CG12910	-0.373333	0.0315466	0.370691
1314	3R	16573577	16573846	peak_26529_Young	FBgn0038446	CG14903	0.319698	0.0315912	0.370842
1484	2R	4824210	4824463	peak_7465_Young	FBgn0261387	CG17528	0.251862	0.0316081	0.370842
1101	2R	8553197	8553446	peak_8722_Young	FBgn0033301	CG12780	-0.552884	0.031729	0.37112
1107	3L	12334495	12334744	peak_18568_Old	FBgn0036277	CG10418	-0.698652	0.03169	0.37112
1168	3R	29318562	29318811	peak_30553_Young	FBgn0015622	Cnx99A	-0.420487	0.0317181	0.37112
1173	X	21630499	21630750	peak_38811_Mid	FBgn0024807	DIP1	0.361429	0.0317254	0.37112
1529	3R	13271419	13272151	peak_25446_Young	FBgn0038129	CG8449	0.219027	0.0318045	0.371718
1103	3R	11678986	11679235	peak_24977_Young	FBgn0037933	Ho	-0.638195	0.0318448	0.371827
1126	3R	31038845	31039121	peak_31147_Young	FBgn0010015	CanA1	-0.454555	0.0318719	0.371827
1252	2L	5923733	5924010	peak_2143_Young	FBgn0015381	dsf	0.338848	0.0318869	0.371827
1110	3L	5480162	5480411	peak_16437_Young	FBgn0035607	CG4835	-0.58034	0.0319286	0.372029
1304	3L	12149112	12149366	peak_18527_Young	FBgn0052099	eap	0.291995	0.031985	0.372402
1113	2R	23603331	23603580	peak_13853_Young	FBgn0034882	CG5398	-0.596561	0.0320968	0.372567
1159	3R	7810859	7811108	peak_23799_Mid	FBgn0037521	CG2993	0.416761	0.0320865	0.372567
1186	X	12031316	12031565	peak_35864_Young	FBgn0030369	Cyp318a1	-0.410516	0.0320622	0.372567
1516	2R	12876349	12876614	peak_10174_Young	FBgn0025692	CG3814	-0.302036	0.0320771	0.372567
1259	3L	16327828	16328106	peak_19754_Young	FBgn0036610	CG13058	-0.34226	0.0321826	0.373095
1385	X	437332	437588	peak_32045_Young	FBgn0011822	pcl	0.294735	0.0321912	0.373095
1150	4	1230350	1230602	peak_31928_Old	FBgn0027101	Dyrk3	-0.416787	0.0323656	0.374818
1256	X	11492703	11492984	peak_35669_Young	FBgn0052666	Drak	0.322667	0.032389	0.374818
1564	2R	13223735	13223994	peak_10288_Young	FBgn0043010	Fsn	-0.221392	0.0324416	0.375143
1271	3L	16228972	16229229	peak_19712_Young	FBgn0036579	CG5027	0.344842	0.0326417	0.37642
1299	2R	11970537	11970792	peak_9925_Mid	FBgn0026573	ADD1	0.350892	0.0326419	0.37642
1379	2L	17450989	17451248	peak_5697_Young	FBgn0260632	dl	-0.310454	0.0326507	0.37642
1533	3R	16502613	16502869	peak_26519_Young	FBgn0028381	Decay	0.249004	0.0326352	0.37642
1141	X	2325122	2325376	peak_32930_Young	FBgn0040391	CG2854	-0.486683	0.0327137	0.376862
1576	X	19496511	19496779	peak_38102_Young	FBgn0040890	ksh	-0.233955	0.0327821	0.377365
1292	2L	18442849	18443112	peak_5930_Mid	FBgn0261597	RpS26	0.306583	0.0328231	0.377552
1551	2R	22120995	22121262	peak_13251_Young	FBgn0002715	mei-S332	-0.319643	0.0329279	0.378188
1557	X	654422	654676	peak_32136_Young	FBgn0025637	SkpA	0.234346	0.0329119	0.378188
1306	2L	12020810	12021084	peak_4097_Young	FBgn0032395	CG6734	-0.30544	0.0330325	0.379104
1181	2L	8009852	8010129	peak_2883_Young	FBgn0031975	Tg	-0.439568	0.0330586	0.379118
1498	3L	4403331	4403589	peak_16139_Young	FBgn0035540	Syx17	0.272935	0.033154	0.379927
1242	2L	3803053	3803334	peak_1488_Young	FBgn0021800	Reph	-0.328842	0.033195	0.380111
1245	3L	9682162	9682647	peak_17767_Young	FBgn0087040	alphaTub67C	-0.373154	0.0333349	0.380856
1328	2L	6070922	6071183	peak_2218_Young	FBgn0266449	Kr-h2	-0.297318	0.0333228	0.380856
1425	2R	16149983	16150241	peak_11235_Young	FBgn0034083	lbk	0.26512	0.0332956	0.380856
1140	X	7347081	7347330	peak_34427_Young	FBgn0029946	CG15034	-0.553664	0.0334905	0.381582
1277	X	22487336	22487585	peak_38887_Young	FBgn0027279	l(1)G0196	-0.340465	0.0334639	0.381582
1428	3R	5779159	5779416	peak_23176_Young	FBgn0037374	jagn	-0.292262	0.0335186	0.381582
1588	2R	15848467	15848956	peak_11112_Young	FBgn0034045	CG8249	0.230639	0.0335234	0.381582
1705	X	21519070	21519323	peak_38776_Young	FBgn0031182	Cyp6t1	0.224892	0.0334325	0.381582
1264	3R	30647144	30647629	peak_31019_Young	FBgn0085461	CG34432	-0.346712	0.0335687	0.381813
1143	3R	16080346	16080595	peak_26336_Young	FBgn0052855	CG32855	-0.616238	0.0336397	0.381814
1145	3L	12891733	12891982	peak_18735_Young	FBgn0036323	CG14118	-0.606862	0.0336939	0.381814
1223	2L	1759002	1759269	peak_827_Mid	FBgn0031365	CG17650	0.455166	0.033665	0.381814
1350	2R	22212440	22212694	peak_13290_Mid	FBgn0025186	ari-2	0.295745	0.0336326	0.381814
1561	3L	7654378	7654881	peak_17088_Young	FBgn0035807	CG7492	0.233347	0.0336799	0.381814
1472	3R	30461196	30461558	peak_30941_Young	FBgn0039773	CG2224	0.276161	0.03376	0.38228
1155	3L	10800972	10801221	peak_18068_Young	FBgn0036102	CG12523	-0.504962	0.0339861	0.384117
1204	3R	8000911	8001160	peak_23855_Mid	FBgn0037536	CG2698	0.384283	0.0340059	0.384117
1282	2R	7178522	7179052	peak_8152_Young	FBgn0053140	CG33140	-0.341904	0.0340229	0.384117
1693	3L	8827303	8827558	peak_17517_Young	FBgn0263930	dally	0.209253	0.0340093	0.384117
1151	2L	15291865	15292114	peak_5104_Young	FBgn0011239	ms(2)35Ci	-0.52706	0.0340698	0.384361
1178	2R	19688510	19688793	peak_12390_Young	FBgn0034467	CG15128	-0.47161	0.0342075	0.384362
1193	3R	19880182	19880431	peak_27469_Mid	FBgn0014006	Pk92B	0.427547	0.0341534	0.384362
1257	2R	15847312	15847586	peak_11110_Young	FBgn0034045	CG8249	-0.360123	0.0342973	0.384362
1281	2L	9957423	9957691	peak_3526_Mid	FBgn0032170	CG4658	0.3265	0.0343047	0.384362
1290	3L	20353886	20354177	peak_21068_Young	FBgn0036975	CG5618	-0.355049	0.0343177	0.384362
1291	3L	19464671	19465242	peak_20765_Young	FBgn0036870	CG14095	-0.41627	0.0343367	0.384362
1394	3L	16359339	16359610	peak_19774_Young	FBgn0266417	CG45057	-0.315329	0.0343468	0.384362
1406	X	9227648	9228418	peak_34948_Young	FBgn0030108	Gr8a	-0.30368	0.034301	0.384362
1592	2L	20416976	20417228	peak_6612_Young	FBgn0032859	Arpc2	0.24567	0.0342008	0.384362
1674	X	2194674	2194979	peak_32864_Young	FBgn0029603	CG14053	0.224358	0.0342485	0.384362
1813	X	8805816	8806073	peak_34833_Young	FBgn0026411	Lim1	0.216566	0.0341498	0.384362
1161	2L	16752597	16752867	peak_5512_Young	FBgn0032601	yellow-b	-0.528136	0.0346263	0.384911
1164	2L	1822396	1822645	peak_834_Young	FBgn0051933	CG31933	-0.52622	0.0348624	0.384911
1165	2L	14775570	14775819	peak_4960_Young	FBgn0032549	CG4650	-0.568252	0.0349096	0.384911
1177	2L	1344615	1344912	peak_670_Young	FBgn0026141	Cdlc2	-0.462345	0.0348201	0.384911
1182	3L	16940230	16940550	peak_19998_VeryOld	FBgn0036679	CG13022	-0.504078	0.0348869	0.384911
1200	3L	5662111	5662360	peak_16489_Mid	FBgn0035627	Sse	0.441537	0.0347719	0.384911
1255	2L	620362	620821	peak_371_Young	FBgn0040106	lectin-21Cb	-0.409471	0.0350373	0.384911
1288	2L	10321066	10321403	peak_3629_Young	FBgn0032219	CG4995	-0.375915	0.0350023	0.384911
1322	3R	19643055	19643310	peak_27377_Mid	FBgn0038722	Nup58	0.331304	0.0347435	0.384911
1340	2L	16255849	16256098	peak_5342_Young	FBgn0028515	EndoGI	-0.329362	0.0346919	0.384911
1384	2R	9603961	9604250	peak_9147_Mid	FBgn0050000	GstT1	0.284276	0.0344731	0.384911
1388	2R	8064984	8065233	peak_8519_Young	FBgn0033252	CG12769	-0.297722	0.0347242	0.384911
1485	2R	19881109	19881382	peak_12447_Young	FBgn0034477	CG13872	-0.27326	0.0344915	0.384911
1486	X	18635331	18635586	peak_37773_Young	FBgn0030941	wgn	-0.261088	0.0348306	0.384911
1489	X	18136721	18136989	peak_37610_Young	FBgn0262874	CG43229	0.266663	0.0348478	0.384911
1547	3R	16453717	16453967	peak_26496_Young	FBgn0038431	CG10405	0.234373	0.0350137	0.384911
1563	X	4319323	4319583	peak_33606_Young	FBgn0266570	CG2982	0.250433	0.0349805	0.384911
1565	3R	29806656	29806912	peak_30691_Young	FBgn0002924	ncd	0.233381	0.03483	0.384911
1580	X	3176183	3176467	peak_33252_Young	FBgn0000479	dnc	-0.262401	0.0344275	0.384911
1623	3L	17432838	17433327	peak_20129_Young	FBgn0052176	CG32176	0.220144	0.0350087	0.384911
1675	2L	22169044	22169300	peak_7147_Young	FBgn0032979	Clamp	0.244746	0.0348684	0.384911
1680	3R	18983525	18984038	peak_27164_Young	FBgn0026239	gukh	0.21174	0.035027	0.384911
1692	2R	7885970	7886244	peak_8449_Young	FBgn0085390	Dgk	-0.214011	0.0350515	0.384911
1710	2L	12719787	12720041	peak_4274_Young	FBgn0032456	MRP	-0.231922	0.0346966	0.384911
1732	3R	10212922	10213189	peak_24583_Young	FBgn0025879	Timp	0.198718	0.0346786	0.384911
1865	3R	4852456	4852719	peak_22756_Young	FBgn0003002	opa	0.194201	0.0346579	0.384911
1490	2L	7026944	7027397	peak_2568_Young	FBgn0031881	CG3476	-0.254705	0.035127	0.384935
1521	X	15483233	15483505	peak_36777_Young	FBgn0030648	CG6340	-0.24793	0.0351128	0.384935
1601	X	15084304	15084839	peak_36679_Young	FBgn0030612	CG5599	0.233612	0.0351293	0.384935
1289	3R	29245566	29245876	peak_30518_Young	FBgn0051445	CG31445	-0.414266	0.0352823	0.385578
1624	3R	23890978	23891235	peak_28742_Young	FBgn0025574	Pli	0.213213	0.035239	0.385578
1645	3R	13402928	13403438	peak_25486_Young	FBgn0038149	GILT1	0.218599	0.0352891	0.385578
1681	2R	22670591	22671121	peak_13491_Young	FBgn0034763	RYBP	0.215086	0.0352881	0.385578
1637	2R	5967665	5967932	peak_7690_Young	FBgn0033048	CG7881	0.231579	0.0353604	0.386081
1183	3L	21380692	21380941	peak_21468_Young	FBgn0261258	rgn	-0.562534	0.0355562	0.38699
1184	3R	16356040	16356289	peak_26466_Young	FBgn0038420	CG10311	-0.481764	0.0355062	0.38699
1335	3R	27700482	27700767	peak_29974_Mid	FBgn0045862	btz	0.321986	0.0355837	0.38699
1357	2L	8685748	8686022	peak_3124_Young	FBgn0260861	Trs23	0.313796	0.0355624	0.38699
1499	3R	24104888	24105156	peak_28822_Young	FBgn0013343	Syx1A	-0.266282	0.035564	0.38699
1780	2R	24793241	24793512	peak_14353_Young	FBgn0015801	Reg-5	0.20444	0.0355958	0.38699
1599	2R	17544355	17544789	peak_11701_Young	FBgn0028382	cyp33	-0.28299	0.0356336	0.387125
1210	3R	29199264	29199543	peak_30490_Young	FBgn0014427	CG11899	-0.45486	0.0356644	0.387185
1190	2L	13448804	13449053	peak_4487_Young	FBgn0032525	Hsp60D	-0.590961	0.036033	0.38767
1194	3R	23683013	23683262	peak_28666_Young	FBgn0042106	CG18754	-0.482602	0.0361497	0.38767
1226	3L	15714305	15714573	peak_19542_Young	FBgn0260777	CG42571	-0.48086	0.0361657	0.38767
1236	2R	7427343	7427605	peak_8253_Young	FBgn0033168	CG11145	-0.445338	0.036137	0.38767
1237	2R	16869252	16869501	peak_11475_Young	FBgn0034162	CG6426	-0.43107	0.036017	0.38767
1241	2L	19440514	19440763	peak_6332_Young	FBgn0003346	RanGAP	-0.400632	0.0360435	0.38767
1251	2L	5207395	5207644	peak_1926_Young	FBgn0031688	Cyp28d2	-0.397539	0.0360385	0.38767
1263	2L	20674145	20674406	peak_6668_Young	FBgn0086657	ik2	-0.371076	0.0361279	0.38767
1287	2L	13332829	13333083	peak_4445_Mid	FBgn0264308	CG43778	0.366701	0.0359935	0.38767
1344	2L	21574085	21574353	peak_6966_Young	FBgn0032949	Lamp1	-0.340303	0.0359658	0.38767
1450	2R	7025334	7025641	peak_8083_Young	FBgn0033127	Tsp42Ef	-0.273648	0.0361101	0.38767
1535	3R	25056101	25056355	peak_29120_Young	FBgn0266719	Unc-13-4B	-0.263506	0.0358628	0.38767
1559	2R	14992082	14992520	peak_10858_Young	FBgn0033989	CG7639	0.262663	0.0357475	0.38767
1571	2R	15613681	15613939	peak_11057_Young	FBgn0260429	CG42524	0.240188	0.0360823	0.38767
1626	2L	18995981	18996252	peak_6143_Young	FBgn0051792	CG31792	-0.271338	0.0360229	0.38767
1640	3R	23933758	23934305	peak_28762_Young	FBgn0039130	CG5854	0.217065	0.0360211	0.38767
1686	3L	7911815	7912074	peak_17175_Young	FBgn0035824	CG8281	0.223688	0.0361663	0.38767
1688	3R	11619838	11620098	peak_24955_Young	FBgn0037920	CG14710	0.204269	0.0357735	0.38767
1500	2L	129582	129841	peak_164_Young	FBgn0025683	CG3164	-0.350609	0.0362246	0.387829
1506	2R	23553867	23554330	peak_13829_Mid	FBgn0034878	pita	0.264182	0.0362319	0.387829
1205	X	6075070	6075319	peak_34049_Young	FBgn0029837	Tsp5D	-0.537495	0.0362874	0.38815
1202	2L	1869866	1870115	peak_852_Young	FBgn0031372	CG7295	-0.551849	0.036482	0.388508
1207	2L	14774078	14774327	peak_4958_Young	FBgn0032549	CG4650	-0.55519	0.0367481	0.388508
1208	3L	6145089	6145377	peak_16632_Old	FBgn0020642	Lcp65Ac	-0.591719	0.0368058	0.388508
1211	2R	22103947	22104196	peak_13239_Mid	FBgn0034694	CG6613	0.52932	0.036781	0.388508
1218	3L	16337671	16337922	peak_19760_Young	FBgn0036612	CG4998	-0.590585	0.037137	0.388508
1231	2R	6689990	6690280	peak_7933_Young	FBgn0050446	Tdc2	-0.494314	0.0367625	0.388508
1272	3R	24754190	24754454	peak_29013_Mid	FBgn0000140	asp	0.373285	0.0365582	0.388508
1286	X	19211682	19212083	peak_37990_Young	FBgn0030999	Mur18B	-0.410211	0.0369808	0.388508
1310	2L	20091490	20091739	peak_6531_Young	FBgn0032846	CG10721	-0.333702	0.0365441	0.388508
1332	2R	19689481	19689762	peak_12392_Young	FBgn0040729	CG15126	-0.349549	0.0370322	0.388508
1351	3R	25277706	25277974	peak_29202_Mid	FBgn0039311	CG10513	0.340214	0.0372371	0.388508
1356	3R	30504171	30504612	peak_30964_Young	FBgn0039782	CG15539	-0.407123	0.0371986	0.388508
1365	2R	18835141	18835403	peak_12109_Young	FBgn0034399	CG15083	-0.337098	0.0372176	0.388508
1403	3L	9511127	9511405	peak_17728_Young	FBgn0010408	RpS9	0.295244	0.0371448	0.388508
1446	2R	22066225	22066484	peak_13218_Young	FBgn0265184	CG44249	-0.315851	0.0368031	0.388508
1492	2R	17769893	17770150	peak_11784_Young	FBgn0034279	CG18635	-0.364707	0.0363513	0.388508
1524	2R	23551195	23551449	peak_13825_Young	FBgn0010501	Dcp-1	-0.275152	0.0368327	0.388508
1531	3L	13387529	13387965	peak_18861_Young	FBgn0036353	CG10171	0.270649	0.0364034	0.388508
1538	3R	21365165	21365424	peak_27953_Young	FBgn0261839	pre-mod(mdg4)-Y	0.263874	0.0364378	0.388508
1573	3L	6263886	6264394	peak_16670_Young	FBgn0001258	ImpL3	-0.292858	0.0369325	0.388508
1611	2R	21181110	21181369	peak_12904_Young	FBgn0003891	tud	-0.249763	0.0366062	0.388508
1618	3R	20008105	20008380	peak_27518_Young	FBgn0038760	MED25	0.243697	0.0371128	0.388508
1628	X	5421866	5422152	peak_33866_Young	FBgn0029763	CG4165	0.267427	0.0370205	0.388508
1631	3R	17151716	17151972	peak_26670_Young	FBgn0038491	CG5292	0.24342	0.0366496	0.388508
1652	3R	24193652	24194176	peak_28855_Young	FBgn0039165	CG6204	0.22233	0.03708	0.388508
1660	2L	19053738	19054234	peak_6170_Young	FBgn0032748	CG10492	0.23165	0.037035	0.388508
1662	X	5516623	5516888	peak_33882_Young	FBgn0029771	CG12730	-0.227707	0.0371674	0.388508
1665	3R	23141817	23142080	peak_28491_Young	FBgn0004644	hh	-0.293441	0.0366497	0.388508
1670	X	4702205	4702463	peak_33728_Young	FBgn0028325	l(1)G0334	0.228874	0.0370603	0.388508
1682	3R	18366490	18366999	peak_26977_Young	FBgn0038609	Nup43	0.217766	0.0365128	0.388508
1699	2R	18855557	18855819	peak_12118_Young	FBgn0010053	Jheh1	0.207186	0.036383	0.388508
1738	X	16091503	16091763	peak_36988_Young	FBgn0028397	Tob	-0.24554	0.0370653	0.388508
1752	X	16404884	16405143	peak_37074_Young	FBgn0030747	CG4301	-0.246471	0.0368879	0.388508
1783	3R	29063182	29063435	peak_30436_Young	FBgn0039633	CG11873	0.208211	0.0369732	0.388508
1793	2L	3538605	3538862	peak_1388_Young	FBgn0024244	drm	0.221612	0.0371878	0.388508
1880	2L	15431718	15431972	peak_5141_Young	FBgn0028892	CG4161	0.243103	0.0364884	0.388508
1260	2L	5743158	5743412	peak_2080_Young	FBgn0031734	CG11147	-0.497603	0.0373732	0.389061
1523	2R	21140207	21140475	peak_12875_Young	FBgn0034592	CG9406	-0.348287	0.0373402	0.389061
1615	4	960231	960484	peak_31871_Young	FBgn0052016	4E-T	0.241214	0.0374031	0.389061
1649	X	5965677	5965937	peak_34009_Young	FBgn0029830	Grip	-0.245317	0.0374285	0.389061
1706	3R	29723002	29723491	peak_30648_Young	FBgn0042213	CG18731	0.23592	0.0374479	0.389061
1707	3R	11581764	11582024	peak_24944_Young	FBgn0037917	wkd	0.214142	0.0374459	0.389061
1709	X	4366270	4366530	peak_33616_Young	FBgn0029706	CG3626	0.238067	0.0374686	0.389061
1870	3R	13875088	13875347	peak_25609_Young	FBgn0008646	E5	0.226918	0.0375104	0.389231
1228	3L	21491486	21491735	peak_21513_Young	FBgn0037087	CG7519	-0.577447	0.0376927	0.390857
1534	2L	8686120	8686607	peak_3125_Young	FBgn0260861	Trs23	0.260277	0.0377345	0.390941
1885	3R	14481699	14481962	peak_25810_Young	FBgn0086901	cv-c	0.19997	0.0377521	0.390941
1265	3L	8807247	8807496	peak_17515_Mid	FBgn0052024	CG32024	0.41017	0.0378685	0.391881
1737	2R	22384124	22384387	peak_13363_Young	FBgn0034723	CG13506	-0.25154	0.0379508	0.391922
1742	3L	8405259	8405520	peak_17347_Young	FBgn0035890	CG13667	0.223972	0.0379362	0.391922
1782	3R	26863027	26863549	peak_29675_Young	FBgn0051072	Lerp	0.217027	0.0379326	0.391922
1814	2L	23176093	23176351	peak_7239_Young	FBgn0039958	CG12567	0.259787	0.0379751	0.391922
1235	X	4254238	4254487	peak_33583_Young	FBgn0029700	CG15576	-0.542549	0.0381545	0.392627
1250	3L	16358712	16358961	peak_19773_Young	FBgn0266417	CG45057	-0.486107	0.0381661	0.392627
1283	3R	9637510	9637761	peak_24390_Young	FBgn0012344	Dh44	-0.397121	0.0382749	0.392627
1397	X	9657969	9658218	peak_35092_VeryOld	FBgn0028341	l(1)G0232	-0.328456	0.0382688	0.392627
1421	3L	21808039	21808359	peak_21657_Young	FBgn0000560	eg	-0.351448	0.0381245	0.392627
1466	2R	21613807	21614252	peak_13064_Young	FBgn0034639	CG15673	-0.303367	0.0381166	0.392627
1566	3R	31404650	31404905	peak_31285_Young	FBgn0261988	Gprk2	0.249251	0.0381984	0.392627
1676	X	2585846	2586100	peak_33041_Young	FBgn0040066	wds	0.242093	0.0382749	0.392627
1779	2L	2147186	2147678	peak_940_Young	FBgn0027509	CG7261	0.232718	0.0382064	0.392627
1802	3L	19663666	19663918	peak_20838_Young	FBgn0036899	tey	0.207207	0.0383198	0.392823
1480	X	9605850	9606105	peak_35069_Young	FBgn0264691	Lst8	-0.282653	0.0384041	0.392895
1824	2R	21700336	21700607	peak_13097_Young	FBgn0004362	HmgD	0.204557	0.038369	0.392895
1902	2R	19826372	19826627	peak_12430_Young	FBgn0034476	Toll-7	0.237679	0.0383895	0.392895
1458	X	10234880	10235145	peak_35251_VeryOld	FBgn0030187	Ipod	0.334992	0.0384807	0.393229
1671	X	11558576	11558831	peak_35696_Young	FBgn0030309	CG1572	-0.278137	0.0384882	0.393229
1449	2L	9613876	9614160	peak_3420_Young	FBgn0040070	Trx-2	-0.325144	0.0385172	0.393262
1828	2R	19228876	19229131	peak_12218_Young	FBgn0010434	cora	0.203054	0.0386129	0.393975
1691	3L	692800	693054	peak_14837_Young	FBgn0260862	Vti1	0.248417	0.0386827	0.394424
1244	3R	13945032	13945281	peak_25618_Young	FBgn0038188	Art9	-0.584653	0.0388361	0.39475
1246	3R	11137481	11137730	peak_24814_Young	FBgn0037862	CG4706	-0.590716	0.0388688	0.39475
1312	2R	16418526	16418885	peak_11345_Young	FBgn0029153	Menl-2	-0.422365	0.0388433	0.39475
1355	2L	17529988	17530467	peak_5723_Young	FBgn0032648	CG15144	-0.366232	0.0387571	0.39475
1493	3L	17024179	17024437	peak_20034_Young	FBgn0036688	Fit2	0.285184	0.0387919	0.39475
1657	2L	10970085	10970569	peak_3819_Young	FBgn0032321	YL-1	0.257514	0.0388957	0.39475
1858	3R	30046311	30047030	peak_30784_Young	FBgn0039741	CG7943	0.202427	0.0388771	0.39475
1249	2L	17179472	17179721	peak_5615_Young	FBgn0045486	Gr36b	-0.594443	0.0389272	0.394807
1513	3L	9447601	9447881	peak_17695_Young	FBgn0035995	CG3529	-0.316299	0.0389802	0.39482
1716	2R	12027839	12028095	peak_9945_Young	FBgn0260012	pds5	0.210665	0.0389701	0.39482
1253	2L	14328727	14328976	peak_4784_Young	FBgn0261529	ms(2)34Fe	-0.544478	0.0391522	0.395172
1324	2R	5663778	5664029	peak_7543_Young	FBgn0033029	Not3	-0.411022	0.0391164	0.395172
1455	3R	21888690	21888977	peak_28111_Young	FBgn0264426	CG43844	-0.370424	0.0391645	0.395172
1462	X	2709605	2709886	peak_33093_Young	FBgn0024997	CG2681	-0.332266	0.0391473	0.395172
1721	2L	414944	415198	peak_285_Young	FBgn0263933	ebi	0.221517	0.0390884	0.395172
1756	X	8592784	8593052	peak_34788_Young	FBgn0025864	Crag	-0.211876	0.039248	0.395172
1784	3R	13401126	13401384	peak_25483_Young	FBgn0038149	GILT1	0.207718	0.0392152	0.395172
1796	2L	2754060	2754326	peak_1117_Young	FBgn0250906	Pgk	0.203795	0.0391901	0.395172
1808	2L	2579923	2580645	peak_1075_Young	FBgn0031437	Arpc5	0.222508	0.0392318	0.395172
1537	2R	23943214	23943475	peak_13976_Young	FBgn0001123	Galphas	-0.305949	0.0393106	0.395542
1258	3R	19916483	19916732	peak_27490_Young	FBgn0038751	CG4770	-0.542155	0.0393575	0.395753
1689	3R	7151197	7151684	peak_23614_Young	FBgn0011020	Sas-4	0.230741	0.0394063	0.395983
1313	3L	12534444	12534693	peak_18623_Young	FBgn0036300	CG10688	-0.406023	0.0395103	0.396249
1338	2L	23315046	23315327	peak_7255_Mid	FBgn0058042	CG40042	0.498246	0.0397703	0.396249
1515	X	7528409	7528667	peak_34443_Young	FBgn0262612	CG43138	0.281861	0.0397585	0.396249
1544	2L	18505736	18506274	peak_5967_Young	FBgn0032683	kon	-0.314801	0.0397295	0.396249
1579	X	7893933	7894397	peak_34548_Young	FBgn0040087	p115	0.270915	0.0397347	0.396249
1605	X	11557625	11557898	peak_35694_Young	FBgn0030309	CG1572	-0.26316	0.0395475	0.396249
1666	3L	12805772	12806026	peak_18704_Young	FBgn0262714	Sap130	0.243884	0.0396113	0.396249
1702	2L	9793011	9793265	peak_3487_Young	FBgn0032150	CG13123	0.243326	0.039558	0.396249
1722	2L	1077389	1077651	peak_567_Young	FBgn0015905	ast	-0.247286	0.0395446	0.396249
1726	2L	1502781	1503037	peak_743_Young	FBgn0031344	CG7420	0.272134	0.0396518	0.396249
1815	3R	8563737	8564470	peak_24022_Young	FBgn0266916	Cenp-C	0.218529	0.0396626	0.396249
1847	2R	6880856	6881112	peak_8026_Young	FBgn0033113	Spn42Dc	-0.202433	0.0395655	0.396249
2005	2L	9758616	9759160	peak_3473_Young	FBgn0022720	zf30C	0.175024	0.0396839	0.396249
1268	3R	21759099	21759348	peak_28067_VeryOld	FBgn0259237	CG42335	-0.574236	0.0401803	0.397803
1270	3L	9684618	9684867	peak_17769_Young	FBgn0036029	CG16719	-0.567549	0.0404475	0.397803
1316	3R	29250383	29250655	peak_30521_Young	FBgn0263236	SP1029	-0.418065	0.0401317	0.397803
1368	3R	30888012	30888261	peak_31098_VeryOld	FBgn0000416	Sap-r	-0.437806	0.0402732	0.397803
1391	2L	17292939	17293241	peak_5643_Mid	FBgn0032632	CG6380	0.360341	0.0402968	0.397803
1392	3R	27937482	27937736	peak_30035_Mid	FBgn0039560	CG5514	0.357419	0.0404072	0.397803
1410	2L	8488799	8489064	peak_3064_Young	FBgn0032047	CG13088	-0.35821	0.0404223	0.397803
1422	X	14169600	14170136	peak_36404_Young	FBgn0030537	CG12480	-0.343493	0.0401567	0.397803
1457	2L	12173168	12173470	peak_4145_Mid	FBgn0000114	aret	0.359377	0.0400287	0.397803
1473	2R	16824018	16824318	peak_11458_Young	FBgn0085488	CG34459	-0.301411	0.0402477	0.397803
1526	2R	16337907	16338165	peak_11312_Young	FBgn0262511	Vha44	-0.275243	0.0403901	0.397803
1582	3L	12914187	12914445	peak_18745_Young	FBgn0052115	CG32115	0.274174	0.040325	0.397803
1619	2R	23203888	23204144	peak_13680_Young	FBgn0085400	CG34371	0.255233	0.0401242	0.397803
1653	2R	7039895	7040168	peak_8090_Young	FBgn0053914	CG33914	-0.262257	0.0401354	0.397803
1719	2R	23752613	23752871	peak_13908_Young	FBgn0034901	CG11300	0.251001	0.0403963	0.397803
1837	2L	2857532	2857790	peak_1151_Young	FBgn0031474	CG2991	-0.22039	0.0401965	0.397803
1872	2L	21681529	21682241	peak_6999_Young	FBgn0000559	EF2	0.210619	0.0401344	0.397803
2056	3R	31065027	31065293	peak_31159_Young	FBgn0024288	Sox100B	0.206968	0.04002	0.397803
2090	2L	18455557	18456361	peak_5936_Young	FBgn0032680	Ntf-2r	-0.200338	0.0402061	0.397803
2097	3R	19250066	19250337	peak_27264_Young	FBgn0038694	CG5217	0.176906	0.0403946	0.397803
1274	2L	18008427	18008676	peak_5813_Young	FBgn0261358	CG42635	-0.599903	0.0405187	0.397848
1420	3L	21843386	21843675	peak_21673_Young	FBgn0037139	CG14563	-0.339795	0.0405213	0.397848
1816	X	12897268	12897525	peak_36049_Young	FBgn0259171	Pde9	0.232839	0.0405303	0.397848
1329	2L	6546915	6547164	peak_2406_Mid	FBgn0000320	eya	0.406389	0.0406522	0.398253
1373	2R	18276756	18277033	peak_11918_Mid	FBgn0053198	pen-2	0.354458	0.0407208	0.398253
1404	2L	13436248	13436750	peak_4481_Young	FBgn0026760	Tehao	-0.38655	0.040728	0.398253
1764	2R	20525627	20525897	peak_12673_Young	FBgn0034511	GNBP-like3	0.249404	0.040689	0.398253
1848	3L	7529403	7529658	peak_17039_Young	FBgn0028582	lqf	-0.206152	0.0406708	0.398253
1889	3L	17669159	17669409	peak_20227_Young	FBgn0036746	Crtc	0.206626	0.0406495	0.398253
1647	3R	18395654	18395914	peak_26990_Young	FBgn0264751	CG44009	-0.30119	0.0408441	0.398531
1807	2L	15748050	15748301	peak_5231_Young	FBgn0010382	CycE	-0.232523	0.0408314	0.398531
1893	3L	20518374	20518644	peak_21156_Young	FBgn0037007	CG5059	0.209747	0.040855	0.398531
1899	2R	19682929	19683183	peak_12388_Young	FBgn0040730	CG15127	-0.234359	0.0408609	0.398531
1285	2R	5957878	5958127	peak_7685_Young	FBgn0033047	CG7882	-0.513235	0.0409704	0.39858
1362	2R	20698565	20698830	peak_12726_Old	FBgn0040726	dpr	0.409997	0.0409433	0.39858
1577	2R	24882084	24882342	peak_14393_Young	FBgn0085442	NKAIN	-0.319755	0.0409659	0.39858
1829	3R	7144578	7145093	peak_23610_Young	FBgn0037478	CG2656	0.220441	0.0409227	0.39858
1307	2R	11295768	11296040	peak_9700_Young	FBgn0040763	CG18336	-0.472399	0.0410455	0.39893
1717	3R	8819764	8820033	peak_24125_Young	FBgn0037636	CG9821	0.2338	0.0410917	0.39893
1743	2L	2306655	2307134	peak_999_Young	FBgn0031412	CG16995	0.218139	0.0410589	0.39893
1843	3L	21679418	21680155	peak_21599_Young	FBgn0037117	CG11248	0.20256	0.0411109	0.39893
1959	X	2588364	2588873	peak_33042_Young	FBgn0001404	egh	0.203432	0.0411628	0.39918
1284	3L	6590292	6590541	peak_16796_Young	FBgn0263973	jv	-0.5215	0.0412612	0.399626
1697	2L	18186587	18186841	peak_5877_Young	FBgn0267486	Ptp36E	0.276199	0.0412602	0.399626
1520	3L	19871663	19871928	peak_20897_Young	FBgn0036913	CG8334	-0.334536	0.041373	0.400201
1572	3R	14662826	14663316	peak_25853_Young	FBgn0038252	BigH1	0.290279	0.0413556	0.400201
1343	2R	9881458	9881707	peak_9236_Young	FBgn0033460	Sec24AB	-0.444637	0.041479	0.400973
1541	2L	9707085	9707344	peak_3459_Young	FBgn0051710	CG31710	-0.311335	0.0415935	0.401825
1708	3L	21216750	21217006	peak_21415_Young	FBgn0028427	Ilk	-0.229793	0.0416901	0.402503
1736	X	8651383	8651643	peak_34800_Young	FBgn0004102	oc	-0.23259	0.041752	0.402847
1942	X	11492987	11493242	peak_35670_Young	FBgn0052666	Drak	0.216712	0.0418385	0.403426
1341	3R	25137790	25138039	peak_29147_Mid	FBgn0039283	danr	0.460423	0.0418663	0.403439
1305	2R	17477655	17477904	peak_11680_Young	FBgn0034225	veil	-0.50491	0.0418949	0.40346
1685	3L	18460897	18461152	peak_20444_Young	FBgn0052196	CG32196	0.266953	0.0419318	0.403485
1694	2R	13558014	13558271	peak_10383_Young	FBgn0033856	CG13334	0.262027	0.0419504	0.403485
2205	X	581879	582137	peak_32106_Young	FBgn0261930	vnd	0.165196	0.042089	0.404563
1375	3R	14885671	14885920	peak_25926_VeryOld	FBgn0067628	CG33331	0.381089	0.0424047	0.40683
1703	3L	20491592	20491849	peak_21142_Young	FBgn0037001	CG6020	0.252847	0.0423724	0.40683
1819	X	22963580	22963856	peak_39060_Young	FBgn0069973	CG40485	0.288878	0.0423899	0.40683
1984	X	18085323	18085575	peak_37594_Young	FBgn0030891	dik	0.202876	0.0424371	0.406884
1470	3R	6335075	6335358	peak_23371_Mid	FBgn0037429	Osi19	0.400959	0.042534	0.407557
1517	3L	22503868	22504384	peak_21990_Young	FBgn0263034	CG43329	-0.324457	0.0426246	0.407683
1519	2R	21836702	21836961	peak_13144_Young	FBgn0034663	CG4363	-0.387848	0.0426246	0.407683
1953	2R	20274420	20274677	peak_12601_Young	FBgn0034495	CG11788	0.195546	0.0426272	0.407683
1495	2R	23415289	23415565	peak_13766_Young	FBgn0050411	CG30411	-0.357814	0.0427194	0.407963
1862	3L	24536020	24536282	peak_22265_Young	FBgn0044510	mRpS5	0.267886	0.0427085	0.407963
1963	2L	15331704	15331961	peak_5115_Young	FBgn0001981	esg	0.234141	0.0427367	0.407963
1995	2L	8212283	8213248	peak_2955_Young	FBgn0015299	Ssb-c31a	0.191118	0.0427827	0.408147
1326	3R	23247984	23248233	peak_28527_Young	FBgn0039064	CG4467	-0.488325	0.0428689	0.408459
1929	2R	23356990	23357511	peak_13743_Young	FBgn0034850	CG9875	0.222839	0.0428521	0.408459
1387	3R	27063670	27064081	peak_29764_Old	FBgn0039478	Nep5	-0.42987	0.0429087	0.408583
1678	3R	14558663	14558924	peak_25819_Young	FBgn0038237	Pde6	0.249771	0.0429988	0.409186
1346	3R	27228753	27229002	peak_29805_Young	FBgn0261996	CG42814	-0.456969	0.043168	0.409581
1687	3L	17914079	17914334	peak_20287_Young	FBgn0036772	CG5290	-0.243043	0.0431746	0.409581
1749	3L	12399236	12399495	peak_18580_Young	FBgn0052104	CG32104	0.244496	0.0431676	0.409581
1788	2L	6097475	6098429	peak_2231_Mid	FBgn0266521	stai	0.250504	0.0431367	0.409581
1830	2L	7065749	7066002	peak_2586_Young	FBgn0031886	Nuf2	0.257705	0.0430927	0.409581
1347	2L	1881624	1881873	peak_856_VeryOld	FBgn0051663	CG31663	-0.482913	0.0432843	0.409898
1348	2L	12452252	12452501	peak_4191_Young	FBgn0032436	CG5418	-0.456043	0.0432885	0.409898
1654	2L	6853996	6854253	peak_2512_Young	FBgn0086451	l(2)k09022	0.25317	0.0432461	0.409898
1621	X	11578907	11579167	peak_35705_Young	FBgn0002948	nod	0.282417	0.0434404	0.411081
1453	X	5332384	5332640	peak_33849_Mid	FBgn0010014	CanB	0.376338	0.0435109	0.411494
1336	3R	20115800	20116098	peak_27541_Young	FBgn0038773	CG10887	-0.56054	0.0438758	0.411993
1339	3R	14215582	14215831	peak_25705_Young	FBgn0011582	Dop1R1	-0.605882	0.0440765	0.411993
1345	2L	1869151	1869400	peak_851_Young	FBgn0031372	CG7295	-0.481644	0.0440669	0.411993
1374	X	1349725	1349974	peak_32458_VeryOld	FBgn0024360	CG11418	-0.426961	0.0440372	0.411993
1405	X	23023720	23023973	peak_39085_Young	FBgn0265767	zyd	-0.381158	0.0439406	0.411993
1412	3L	12507743	12508003	peak_18615_Young	FBgn0036294	CG10654	-0.370733	0.0440517	0.411993
1585	3R	5659014	5659283	peak_23115_Mid	FBgn0046222	CG1109	0.378584	0.0440379	0.411993
1593	2L	16543944	16544210	peak_5437_Young	FBgn0259735	CG42389	-0.310522	0.0438994	0.411993
1613	3R	19917279	19917995	peak_27491_Young	FBgn0038751	CG4770	-0.308297	0.0435977	0.411993
1672	2R	20641603	20641864	peak_12707_Young	FBgn0034535	CG11110	0.264543	0.0439486	0.411993
1741	3R	23820438	23820699	peak_28721_Young	FBgn0053111	CG33111	0.248752	0.0437333	0.411993
1754	X	5747645	5747906	peak_33937_VeryOld	FBgn0029798	CG4078	0.238354	0.0438095	0.411993
1762	2R	17514081	17514600	peak_11690_Young	FBgn0034230	CG4853	0.276811	0.0440485	0.411993
1810	3R	20822028	20822281	peak_27754_Young	FBgn0019936	RpS20	0.236554	0.0436893	0.411993
1866	2R	5350575	5351184	peak_7518_Young	FBgn0033019	CG10395	0.216405	0.0436614	0.411993
1936	3R	20592967	20593229	peak_27678_Young	FBgn0023097	bon	0.20964	0.0437059	0.411993
1948	3R	31736870	31737131	peak_31423_Young	FBgn0000557	Ef1alpha100E	0.221729	0.0439771	0.411993
1986	2L	553314	553582	peak_349_Young	FBgn0005660	Ets21C	-0.244837	0.0440021	0.411993
2036	3L	11210568	11210827	peak_18210_Young	FBgn0064766	CG7600	0.20823	0.0437185	0.411993
1840	2L	5801617	5802086	peak_2103_Young	FBgn0031740	CG7239	0.222959	0.044162	0.412288
2133	3R	13714948	13715216	peak_25569_Young	FBgn0085412	CG34383	0.195053	0.0441621	0.412288
2083	2L	11517047	11517316	peak_3973_Young	FBgn0032364	CG4970	0.221611	0.0442095	0.412478
1552	3L	99677	99937	peak_14561_Young	FBgn0040688	CG12483	-0.327542	0.0442402	0.412512
1364	3L	7560856	7561105	peak_17052_Young	FBgn0035798	frac	-0.44559	0.0443645	0.412838
1419	3R	20669100	20669360	peak_27702_Young	FBgn0038819	Cpr92F	-0.388183	0.0444104	0.412838
1463	2R	16230591	16230845	peak_11275_Mid	FBgn0034095	CG15701	0.363447	0.0443313	0.412838
1768	X	13845281	13845689	peak_36324_Mid	FBgn0052626	AMPdeam	0.26626	0.0443921	0.412838
1916	2L	15499452	15499711	peak_5169_Young	FBgn0002524	lace	0.235744	0.0443165	0.412838
2027	X	1478416	1478672	peak_32534_Young	FBgn0025381	rush	0.210553	0.0444603	0.41305
1603	3L	20187748	20188076	peak_21010_Young	FBgn0036945	Ssk	-0.339555	0.0445825	0.413934
1748	2R	11359038	11359293	peak_9728_Young	FBgn0024188	san	0.24537	0.0446195	0.414026
1434	2R	24761395	24761714	peak_14341_Mid	FBgn0035059	CG3894	0.39994	0.044735	0.414493
1479	2L	1492259	1492544	peak_737_Mid	FBgn0051928	CG31928	0.378577	0.0447562	0.414493
1606	3R	21017545	21017811	peak_27816_Mid	FBgn0026056	Rlip	0.269645	0.0447926	0.414493
1668	3R	21498971	21499495	peak_27984_Mid	FBgn0004863	C15	0.291465	0.0448057	0.414493
2047	2R	18503746	18504000	peak_11995_Young	FBgn0034354	GstE11	0.204936	0.0447685	0.414493
1443	2R	7567522	7567805	peak_8322_Young	FBgn0033194	Vps13	-0.420246	0.0448628	0.414771
1380	2L	203342	203602	peak_197_Young	FBgn0031231	mRpL10	-0.431535	0.0448998	0.414861
1518	2L	21261272	21261637	peak_6921_Old	FBgn0021856	l(2)k14505	0.337848	0.0449294	0.414883
1359	2L	10017035	10017284	peak_3552_Young	FBgn0032175	CG13131	-0.567103	0.0450994	0.415384
1361	3R	10401660	10401909	peak_24648_Young	FBgn0045443	mthl11	-0.520728	0.045099	0.415384
1556	X	12596666	12596915	peak_35963_Young	FBgn0052654	Sec16	-0.352167	0.0450486	0.415384
1739	X	15733618	15734125	peak_36871_Young	FBgn0026666	l(1)G0136	-0.261153	0.0451305	0.415384
1988	2L	2766076	2766328	peak_1122_Young	FBgn0028398	Taf10	0.217037	0.0451059	0.415384
2044	3R	7886090	7886601	peak_23812_Young	FBgn0037526	CG10092	0.216807	0.0451468	0.415384
1684	3L	4532016	4532301	peak_16190_Young	FBgn0035557	CG11353	-0.27887	0.045212	0.415733
1378	2R	4471869	4472118	peak_7418_Mid	FBgn0260798	Gprk1	0.451324	0.0452529	0.415858
1461	X	17671589	17672040	peak_37483_Old	FBgn0030859	CG12990	-0.376774	0.0453002	0.416042
2084	3R	30808449	30808705	peak_31073_Young	FBgn0027598	cindr	0.223259	0.0454152	0.416597
2147	2R	4744253	4744771	peak_7448_Young	FBgn0039994	conu	0.206422	0.0453971	0.416597
1935	X	12631453	12631709	peak_35974_Young	FBgn0030412	Tomosyn	0.240382	0.0454828	0.416967
1366	2R	20346624	20346873	peak_12636_Young	FBgn0042198	CG16741	-0.552235	0.0455637	0.41714
1377	2L	9729704	9729953	peak_3466_Young	FBgn0032139	CG13116	-0.473447	0.0455298	0.41714
1469	3R	30584944	30585193	peak_30990_Young	FBgn0039788	Rpt6R	-0.371696	0.0456612	0.41714
1983	2R	8948957	8949224	peak_8886_Young	FBgn0027607	CG8230	0.222453	0.0456657	0.41714
2052	3R	17798198	17798455	peak_26838_Young	FBgn0038546	CG7379	0.209668	0.045613	0.41714
2188	2R	9814330	9814619	peak_9207_Young	FBgn0040092	lectin-46Cb	0.197141	0.0456146	0.41714
1586	3R	19249421	19249680	peak_27263_Mid	FBgn0038694	CG5217	0.308831	0.0457897	0.417474
2007	3L	15691638	15691896	peak_19536_Young	FBgn0085480	CG34451	-0.21493	0.0457425	0.417474
2087	3R	31254786	31255504	peak_31223_Young	FBgn0086362	spn-F	0.210957	0.0458116	0.417474
2198	X	9500077	9500332	peak_35030_Young	FBgn0261260	mgl	0.180398	0.0458013	0.417474
1369	3L	9799459	9799708	peak_17823_Young	FBgn0036046	Ilp2	-0.534391	0.0458966	0.417998
2012	2L	5043103	5043358	peak_1858_Young	FBgn0053995	CG33995	0.223113	0.0459805	0.418263
2032	2R	6985600	6985853	peak_8071_Young	FBgn0022960	vimar	0.224481	0.0459622	0.418263
1602	4	315261	315544	peak_31665_Young	FBgn0052850	CG32850	0.305718	0.0460148	0.418326
1376	X	11091614	11091863	peak_35566_Young	FBgn0027498	CG2061	-0.533124	0.0460871	0.418734
1774	3R	17054289	17054551	peak_26626_Young	FBgn0020493	Dad	-0.269366	0.046237	0.418849
2110	X	6224092	6224347	peak_34090_Young	FBgn0262730	CG14446	0.201897	0.0461659	0.418849
2139	3L	22075698	22076193	peak_21770_Young	FBgn0037150	CG7133	0.219675	0.0462197	0.418849
2267	3R	19934943	19935203	peak_27500_Young	FBgn0021776	mira	0.194413	0.0462163	0.418849
2556	2L	14490298	14490843	peak_4845_Young	FBgn0005771	noc	0.168178	0.0462201	0.418849
1607	3R	21823170	21823432	peak_28086_Young	FBgn0013759	CASK	-0.321883	0.0463623	0.418992
1857	3R	17534822	17535082	peak_26751_Young	FBgn0038516	P5cr-2	0.243253	0.0463166	0.418992
2015	2R	13839878	13840871	peak_10452_Young	FBgn0033875	CG6357	-0.223967	0.0463186	0.418992
2115	2L	5987021	5987282	peak_2171_Young	FBgn0001941	ifc	-0.201535	0.0463625	0.418992
1700	3L	9715357	9715627	peak_17783_Young	FBgn0040475	SH3PX1	-0.293764	0.0464613	0.419138
1777	X	9078361	9078628	peak_34894_Young	FBgn0265413	CG44325	-0.246122	0.0464885	0.419138
1806	3R	18199450	18199711	peak_26928_Young	FBgn0011481	Ssdp	0.251096	0.046478	0.419138
1944	3L	6352315	6352578	peak_16711_Young	FBgn0035699	CG13300	0.224079	0.0464664	0.419138
1587	2R	5259371	5259642	peak_7498_Mid	FBgn0033015	d4	0.308866	0.0465184	0.41916
1746	X	22474095	22474570	peak_38879_Young	FBgn0031189	CG14618	-0.282146	0.0466261	0.419882
1386	X	18806804	18807053	peak_37840_Young	FBgn0030961	CG7058	-0.508416	0.0467313	0.419892
1395	2L	9932725	9932992	peak_3513_Young	FBgn0051876	Cpr30F	-0.451638	0.0467371	0.419892
1863	3R	23118293	23118547	peak_28480_Young	FBgn0039056	CenB1A	0.266296	0.04667	0.419892
2099	2R	24186342	24186818	peak_14091_Young	FBgn0266083	ocm	0.19471	0.0467103	0.419892
1389	3R	11497872	11498121	peak_24919_Young	FBgn0037908	dpr5	-0.512702	0.0472625	0.421255
1401	2L	15901568	15901826	peak_5270_Young	FBgn0051821	CG31821	-0.468304	0.0472645	0.421255
1475	3R	16625104	16625377	peak_26550_VeryOld	FBgn0262742	Fas1	0.408028	0.0472569	0.421255
1542	3R	4161774	4162091	peak_22479_Young	FBgn0058198	CG40198	-0.3216	0.0471379	0.421255
1569	2L	5341711	5341987	peak_1982_Young	FBgn0031703	CG12512	0.35402	0.0470617	0.421255
1598	3L	9712121	9712370	peak_17778_Young	FBgn0045823	vsg	-0.342626	0.0470645	0.421255
1673	X	15909131	15909388	peak_36951_Young	FBgn0030706	CG8909	0.314316	0.0471242	0.421255
1818	2L	21263087	21263352	peak_6923_Young	FBgn0032938	CG8671	0.246741	0.0470221	0.421255
2010	3R	9260500	9261246	peak_24258_Young	FBgn0037669	Ibf2	-0.219912	0.0473014	0.421255
2033	X	7286663	7286921	peak_34395_Young	FBgn0029942	CG2059	0.207625	0.0473028	0.421255
2082	X	8974127	8974388	peak_34863_Young	FBgn0030073	CG10962	0.211194	0.0471451	0.421255
2103	3L	6193074	6193327	peak_16647_Young	FBgn0024921	Trn	0.212508	0.0473016	0.421255
2113	X	19866981	19867235	peak_38267_Young	FBgn0052529	Hers	0.219379	0.0471309	0.421255
2165	3L	12391316	12391826	peak_18578_Young	FBgn0036279	Ncc69	-0.187706	0.0471403	0.421255
2210	X	7286135	7286390	peak_34394_Young	FBgn0029942	CG2059	0.19594	0.0471602	0.421255
1725	X	2366486	2366748	peak_32950_VeryOld	FBgn0003159	ptr	0.276574	0.0475089	0.422843
1409	3L	16609489	16609738	peak_19846_Young	FBgn0002284	Prosbeta6	-0.444433	0.0475944	0.422865
1614	4	930593	930850	peak_31864_Young	FBgn0023213	eIF4G	-0.345762	0.0475933	0.422865
1630	X	7888298	7888618	peak_34544_Mid	FBgn0029969	CG10932	0.292608	0.0475557	0.422865
1975	2L	4981184	4981436	peak_1833_Young	FBgn0083962	CG34126	0.216975	0.0476453	0.42307
2131	3R	31252517	31252990	peak_31222_Young	FBgn0039835	mRpL32	0.220784	0.047699	0.423301
1550	2R	20526172	20526479	peak_12674_Mid	FBgn0034511	GNBP-like3	0.356619	0.0477681	0.423668
2163	X	16332651	16332910	peak_37044_Young	FBgn0011764	Dsp1	-0.225347	0.0478238	0.423916
1503	3L	3314009	3314274	peak_15776_Mid	FBgn0052279	Drsl2	0.399852	0.0479387	0.424687
1400	2R	8012560	8012809	peak_8503_Young	FBgn0033250	CG14762	-0.566688	0.0481002	0.424926
1452	3L	1653582	1653885	peak_15196_Young	FBgn0035252	CG7970	-0.41059	0.0480348	0.424926
1460	3R	6335413	6335678	peak_23372_Old	FBgn0037429	Osi19	0.392327	0.048244	0.424926
1496	X	10387328	10387577	peak_35306_Young	FBgn0030196	Psf3	-0.399057	0.0482996	0.424926
1633	2L	13722408	13722928	peak_4563_Young	FBgn0028847	CG9014	-0.318613	0.0479963	0.424926
1860	3L	1205299	1205559	peak_15017_Young	FBgn0004425	LysB	-0.268171	0.0481623	0.424926
1891	3L	18866027	18866285	peak_20568_Young	FBgn0036818	CG14074	0.250884	0.0481997	0.424926
2043	2L	6611438	6611724	peak_2418_Young	FBgn0031836	CG11050	0.209477	0.0482899	0.424926
2062	X	13740077	13740340	peak_36275_Young	FBgn0030519	CG11151	-0.240442	0.0480569	0.424926
2123	2R	14935538	14936034	peak_10832_Young	FBgn0033984	Lap1	0.218328	0.0481474	0.424926
2166	3L	7361068	7361359	peak_16990_Young	FBgn0035771	Sec63	-0.211708	0.0482514	0.424926
2230	3L	19585619	19586637	peak_20812_Young	FBgn0036888	CG9330	0.193274	0.0482047	0.424926
1418	3L	21627041	21627290	peak_21573_Young	FBgn0037107	CG7166	-0.50051	0.0484147	0.424958
1532	3L	18846678	18846927	peak_20564_Young	FBgn0036816	Indy	-0.369339	0.0484129	0.424958
1786	X	2619383	2619652	peak_33057_Young	FBgn0040336	Seipin	0.275817	0.0483789	0.424958
1900	X	16296826	16297083	peak_37030_Young	FBgn0030735	CG3632	-0.242905	0.0484122	0.424958
1437	3L	21502051	21502316	peak_21519_Young	FBgn0037090	Est-Q	-0.44662	0.0484778	0.425268
1494	2L	9581652	9581908	peak_3409_Young	FBgn0014179	gcm	-0.404916	0.0485093	0.425299
2120	2R	9958408	9958663	peak_9260_Young	FBgn0033466	Pal1	-0.222919	0.0485561	0.425465
1408	3R	21139125	21139374	peak_27862_Old	FBgn0264357	SNF4Agamma	-0.550738	0.0486445	0.425767
1667	3L	4898729	4898989	peak_16318_Young	FBgn0035583	CG13704	-0.303001	0.0487247	0.425767
1695	3L	21381009	21381279	peak_21469_Young	FBgn0261258	rgn	-0.293517	0.0486514	0.425767
1799	2L	6919549	6919827	peak_2528_Mid	FBgn0004838	Hrb27C	0.296721	0.0487294	0.425767
1801	2L	13779657	13779912	peak_4575_Old	FBgn0024846	p38b	0.273122	0.04873	0.425767
1616	2L	17049818	17050098	peak_5591_Mid	FBgn0032625	CG15136	0.339629	0.0488621	0.425837
1804	2R	18451179	18451668	peak_11986_Young	FBgn0034351	CG5190	0.259112	0.0488152	0.425837
1850	2L	8740933	8741203	peak_3151_Young	FBgn0003209	raw	0.268672	0.0488775	0.425837
1882	3R	24630414	24630672	peak_28992_Young	FBgn0046685	Wsck	-0.248726	0.0488178	0.425837
2172	2R	18687986	18688241	peak_12054_Young	FBgn0262102	CG42855	0.200136	0.0488758	0.425837
1976	X	1407454	1407734	peak_32487_Young	FBgn0259108	futsch	0.254128	0.0489057	0.425839
1436	X	1685550	1685799	peak_32643_Young	FBgn0024897	b6	-0.483394	0.048993	0.425952
1451	3R	11437925	11438174	peak_24897_Mid	FBgn0046225	CG17230	0.457467	0.0490296	0.425952
1555	3R	26124825	26125100	peak_29457_Young	FBgn0039413	CG14556	-0.341765	0.0490516	0.425952
1711	2R	24525693	24525961	peak_14251_Young	FBgn0050169	Brca2	0.285308	0.049004	0.425952
1978	3L	4899188	4899440	peak_16319_Young	FBgn0035583	CG13704	-0.261802	0.0490581	0.425952
1426	2R	22855718	22855967	peak_13561_Young	FBgn0034786	CG13531	-0.528218	0.0491096	0.426122
1854	2L	19517498	19517760	peak_6368_Young	FBgn0032798	CG10132	0.268261	0.0492731	0.426122
1867	X	765379	765630	peak_32194_VeryOld	FBgn0015288	RpL22	0.249957	0.0491481	0.426122
1946	2L	7821370	7821873	peak_2810_Young	FBgn0027515	CG7115	-0.22563	0.0491946	0.426122
2071	3R	28336355	28336612	peak_30125_Young	FBgn0261618	larp	0.229033	0.0492714	0.426122
2095	3R	23386075	23386338	peak_28580_Young	FBgn0039075	CG4393	-0.215402	0.0491765	0.426122
2142	3R	18758502	18759238	peak_27112_Young	FBgn0038651	CG14299	0.211698	0.0492637	0.426122
1609	2L	6098603	6098852	peak_2232_VeryOld	FBgn0266521	stai	0.330031	0.0493189	0.426276
1423	3R	13611124	13611373	peak_25526_Old	FBgn0038160	CG9759	0.527647	0.0494537	0.426732
2169	3R	5568522	5569024	peak_23065_Young	FBgn0041191	Rheb	0.21095	0.049426	0.426732
2368	2L	1884452	1884726	peak_857_Young	FBgn0031374	CG7337	0.183815	0.0494555	0.426732
1545	X	13159931	13160180	peak_36106_VeryOld	FBgn0030457	CG12096	0.365389	0.049492	0.426806
1584	X	16372238	16372498	peak_37058_Young	FBgn0004598	Fur2	-0.358642	0.0496631	0.428039
1993	X	16787629	16788147	peak_37202_VeryOld	FBgn0030788	Sap30	0.239783	0.0496955	0.428077
1427	3L	9492136	9492385	peak_17716_Young	FBgn0052037	CG32037	-0.530539	0.0498769	0.428162
1448	3L	21639477	21639726	peak_21578_Young	FBgn0052446	Atox1	-0.476678	0.049935	0.428162
1491	X	8485539	8485798	peak_34740_Young	FBgn0053223	CG33223	-0.427359	0.0498846	0.428162
1568	2R	8453415	8453695	peak_8687_Young	FBgn0002569	Mal-A2	-0.395423	0.0498074	0.428162
1677	3R	7075956	7076227	peak_23574_Young	FBgn0037467	CG1104	-0.355701	0.0499579	0.428162
1729	X	10838075	10838338	peak_35489_Young	FBgn0040850	CG15210	-0.393122	0.0498662	0.428162
1886	3R	23281066	23281611	peak_28541_Mid	FBgn0025781	Cdc16	0.236011	0.0499182	0.428162
1994	3R	30134607	30134870	peak_30815_Young	FBgn0086355	Tpi	0.252149	0.0498267	0.428162
2008	2L	16729567	16729823	peak_5501_Young	FBgn0051812	CG31812	0.239401	0.0499234	0.428162
1617	3L	17895706	17896000	peak_20277_Young	FBgn0036769	Tsp74F	0.352688	0.050092	0.42883
1751	3L	1397516	1397784	peak_15096_Young	FBgn0052320	CG32320	0.311308	0.0500869	0.42883
2357	2R	22122201	22122706	peak_13253_Young	FBgn0002715	mei-S332	0.199388	0.0502119	0.429616
1554	3R	14843260	14843516	peak_25915_Mid	FBgn0038266	CG3610	0.377645	0.0504131	0.430131
1567	2L	11067671	11067991	peak_3860_Young	FBgn0032330	Samuel	-0.388287	0.0503321	0.430131
1648	X	5790071	5790573	peak_33951_Old	FBgn0029809	CG15767	-0.345102	0.0504127	0.430131
2174	2L	19444639	19444893	peak_6335_Young	FBgn0024230	Hs2st	0.197063	0.0503291	0.430131
2219	X	17579741	17579999	peak_37446_Young	FBgn0030847	CG12991	0.192956	0.0503602	0.430131
1439	2L	3492775	3493024	peak_1376_Young	FBgn0031542	CG15414	-0.5722	0.050528	0.430151
1440	3R	27658516	27658765	peak_29953_Young	FBgn0266579	tau	-0.582939	0.0504909	0.430151
1456	2L	13963902	13964151	peak_4643_Young	FBgn0027929	NimB1	-0.493094	0.050455	0.430151
1933	3L	2373551	2373813	peak_15444_Young	FBgn0035333	CG1317	0.234937	0.0505272	0.430151
2155	3L	217515	217788	peak_14625_Young	FBgn0063923	Kaz1-ORFB	-0.30898	0.0505589	0.430173
1821	3R	12422677	12422936	peak_25217_Young	FBgn0038043	CG17202	0.263364	0.0505938	0.430231
2195	X	9608788	9609045	peak_35071_Young	FBgn0261931	CG42797	0.222167	0.050622	0.430231
1474	2L	15998371	15998620	peak_5298_Young	FBgn0028644	beat-Ic	-0.497731	0.0507986	0.431053
1540	X	11793499	11793748	peak_35774_Young	FBgn0000259	CkIIbeta	-0.399944	0.0508035	0.431053
2037	2R	8471706	8471995	peak_8696_Young	FBgn0033297	Mal-A8	-0.254753	0.0507926	0.431053
1454	2L	266346	266595	peak_225_Young	FBgn0031239	CG17075	-0.519759	0.0511256	0.431113
1481	3L	17751263	17751512	peak_20239_Young	FBgn0036751	Adgf-B	-0.444497	0.051289	0.431113
1629	2R	20309832	20310081	peak_12617_Young	FBgn0034500	CG11200	-0.35441	0.0511332	0.431113
1650	2L	21087690	21087948	peak_6858_Young	FBgn0032913	CG9259	-0.337238	0.0512735	0.431113
1769	3R	21871443	21871692	peak_28107_Young	FBgn0051431	CG31431	-0.321002	0.0510088	0.431113
1832	2R	16814375	16814632	peak_11452_Young	FBgn0034160	CG5550	-0.294405	0.0511315	0.431113
1833	2L	20830528	20830783	peak_6738_Mid	FBgn0051673	CG31673	0.285462	0.0509761	0.431113
2011	2R	20835127	20835386	peak_12764_VeryOld	FBgn0011674	insc	-0.361288	0.051186	0.431113
2034	X	2158570	2158839	peak_32847_Young	FBgn0004655	wapl	-0.256317	0.0512156	0.431113
2049	X	8560104	8560359	peak_34773_Young	FBgn0030049	Trf4-1	-0.24546	0.0510307	0.431113
2068	2L	142515	142776	peak_169_Young	FBgn0031224	CG11454	-0.278319	0.051066	0.431113
2145	2R	16589125	16589382	peak_11389_Young	FBgn0034141	CG8311	0.220452	0.0511007	0.431113
2197	2R	9426349	9426611	peak_9077_Young	FBgn0017558	Pdk	0.217463	0.0509347	0.431113
2249	X	14603329	14604084	peak_36502_Young	FBgn0030574	CG9413	0.204443	0.0512907	0.431113
2256	3L	25120580	25120835	peak_22289_Young	FBgn0260008	Ucrh	0.244993	0.0511096	0.431113
2412	X	801390	801894	peak_32209_Young	FBgn0015799	Rbf	0.192385	0.05101	0.431113
2427	X	16372547	16373051	peak_37059_Young	FBgn0004598	Fur2	-0.209557	0.0512872	0.431113
1757	3R	28831658	28831907	peak_30331_Old	FBgn0024273	WASp	-0.298385	0.051396	0.431113
1962	3R	11407759	11408252	peak_24886_Young	FBgn0011774	Irbp	0.260896	0.051432	0.431113
2088	X	8806642	8806902	peak_34834_Young	FBgn0026411	Lim1	-0.236218	0.0514068	0.431113
2161	X	7291202	7291471	peak_34396_Young	FBgn0025549	unc-119	0.214774	0.0513748	0.431113
2286	3L	184275	184781	peak_14607_Young	FBgn0083992	Mkp	0.216925	0.0513919	0.431113
1464	3R	6695807	6696056	peak_23504_Young	FBgn0004781	Ccp84Ac	-0.542121	0.0516664	0.431656
1467	3L	16859820	16860069	peak_19955_Young	FBgn0036670	CG13029	-0.574471	0.051531	0.431656
1471	2L	22109175	22109424	peak_7121_Young	FBgn0032972	CG10834	-0.547181	0.0516618	0.431656
1522	2R	11435285	11435534	peak_9752_Young	FBgn0033635	CG7777	-0.437892	0.0516546	0.431656
2129	X	1030438	1030903	peak_32299_Young	FBgn0014903	CG14630	0.231276	0.051643	0.431656
2148	X	395821	396076	peak_32035_Young	FBgn0004170	sc	-0.258596	0.0515774	0.431656
1465	3L	19606944	19607193	peak_20819_Young	FBgn0036891	CG9372	-0.514008	0.0518286	0.432535
1634	2R	23864317	23864577	peak_13935_Young	FBgn0034919	CG5569	-0.392512	0.0519133	0.432535
1954	2R	7961763	7962245	peak_8480_Young	FBgn0026361	2020-09-05	-0.24298	0.0518649	0.432535
2218	3R	27288362	27288634	peak_29827_Young	FBgn0015737	Hmu	0.221405	0.0519125	0.432535
2442	3R	26261415	26261681	peak_29495_Young	FBgn0000064	Ald	0.184893	0.0518025	0.432535
1488	X	21203934	21204183	peak_38651_Young	FBgn0031164	CG1724	-0.478284	0.0522604	0.432736
1511	X	17453265	17453514	peak_37397_Young	FBgn0030841	CG8568	-0.426973	0.0522166	0.432736
1536	3R	7548665	7548914	peak_23736_Old	FBgn0015568	alpha-Est1	-0.407667	0.05211	0.432736
1596	3L	4752432	4752865	peak_16262_VeryOld	FBgn0035571	CG12493	-0.36024	0.0520915	0.432736
1651	2L	19493695	19493956	peak_6358_Young	FBgn0002044	swm	-0.326422	0.0522777	0.432736
1750	3R	27488671	27489308	peak_29899_Young	FBgn0039520	Gr98a	-0.343056	0.0520467	0.432736
1845	3R	29792498	29793053	peak_30683_Young	FBgn0262112	sro	-0.299644	0.0520038	0.432736
1892	X	11369524	11369784	peak_35637_Young	FBgn0001624	dlg1	0.259465	0.0522235	0.432736
2159	3R	29062903	29063159	peak_30435_Young	FBgn0039633	CG11873	0.209846	0.0522587	0.432736
2221	X	16783802	16784061	peak_37198_Young	FBgn0030786	mRpL22	0.209573	0.0519766	0.432736
2257	3R	11967062	11967827	peak_25073_Young	FBgn0260743	GC1	0.218383	0.0522191	0.432736
2452	X	3555720	3555977	peak_33367_Young	FBgn0052792	ppk8	0.182696	0.052151	0.432736
1898	2L	3355200	3355457	peak_1344_Young	FBgn0020445	E23	-0.253898	0.0523507	0.432872
2290	X	16721286	16721567	peak_37187_Young	FBgn0052572	CG32572	0.230901	0.0523436	0.432872
1505	2L	21198795	21199044	peak_6901_Young	FBgn0011829	Ret	-0.450733	0.0525582	0.432909
1597	2R	8459718	8459967	peak_8689_Young	FBgn0033294	Mal-A4	-0.376644	0.0524389	0.432909
1604	3R	13057445	13057699	peak_25388_Mid	FBgn0004666	sim	0.364614	0.052466	0.432909
1720	X	17423663	17423918	peak_37390_Young	FBgn0030839	CG5613	0.299402	0.0524277	0.432909
1744	3R	16190743	16191045	peak_26388_Young	FBgn0024491	Bin1	-0.345635	0.0525821	0.432909
1897	X	10082056	10082358	peak_35204_Young	FBgn0030177	CG2972	0.266255	0.0525153	0.432909
1905	2R	12355578	12355883	peak_10022_VeryOld	FBgn0050049	CG30049	0.25908	0.0525045	0.432909
2348	3R	31609762	31610019	peak_31368_Young	FBgn0011655	Med	0.199496	0.0525633	0.432909
1658	3L	5510126	5510440	peak_16443_Mid	FBgn0085371	CG34342	0.348761	0.0526848	0.433054
1745	2R	18133644	18133935	peak_11880_Young	FBgn0003044	Pcl	-0.30633	0.0526715	0.433054
2372	2L	8988772	8989028	peak_3227_Young	FBgn0011705	rost	0.230719	0.0526458	0.433054
1827	X	5918637	5918900	peak_33995_Young	FBgn0029823	CG3011	-0.304142	0.0527261	0.43316
1508	2L	9398956	9399205	peak_3341_Young	FBgn0032115	CG4438	-0.433458	0.0528181	0.433682
2214	2L	19398867	19399125	peak_6314_Young	FBgn0032775	CG17544	-0.213228	0.0528773	0.433935
1859	X	19166163	19166412	peak_37970_Young	FBgn0261461	RhoGAP18B	-0.292854	0.0529334	0.434162
1636	3L	21381289	21381628	peak_21470_Young	FBgn0261258	rgn	-0.360963	0.0530293	0.434481
2117	2L	5217636	5218708	peak_1933_Young	FBgn0031692	TpnC25D	-0.250303	0.0530092	0.434481
1961	2R	15573432	15573934	peak_11048_Young	FBgn0034033	CG8204	0.24953	0.0530935	0.434774
1635	X	2178755	2179054	peak_32855_VeryOld	FBgn0015036	Cyp4ae1	-0.358216	0.0532094	0.43549
1504	X	17204033	17204282	peak_37334_Young	FBgn0030824	CG5070	-0.470694	0.0532868	0.435656
2251	2R	11451829	11452339	peak_9758_Young	FBgn0000581	E(Pc)	0.195598	0.05326	0.435656
1501	X	9884512	9884761	peak_35150_Young	FBgn0030160	CG9691	-0.505212	0.0535349	0.435817
1591	3L	12788510	12788759	peak_18693_Young	FBgn0261674	CG42709	-0.354188	0.0533367	0.435817
1730	3R	31616456	31616705	peak_31372_Old	FBgn0039860	CG1792	0.329647	0.0535064	0.435817
1773	3L	3461510	3461798	peak_15851_VeryOld	FBgn0041164	armi	0.309483	0.0533656	0.435817
1841	3R	24850822	24851192	peak_29058_Young	FBgn0039233	CG7006	0.272513	0.0534435	0.435817
1982	3R	4984725	4984982	peak_22810_Young	FBgn0037291	CG14662	-0.330251	0.053522	0.435817
2160	3L	1971181	1971441	peak_15296_Young	FBgn0035300	CG1139	0.225307	0.0535202	0.435817
2246	3L	19552209	19552464	peak_20801_Young	FBgn0036886	CG9300	0.19767	0.0534403	0.435817
1910	2R	12692573	12692825	peak_10123_Young	FBgn0033769	CG8768	0.260846	0.0539025	0.438342
2665	2R	20903525	20903785	peak_12781_Young	FBgn0015524	otp	0.172332	0.0538989	0.438342
1600	X	4380790	4381182	peak_33623_Young	FBgn0029707	CG12688	-0.423912	0.0539544	0.438446
1875	3R	18404817	18405070	peak_26999_Young	FBgn0038619	CG7685	0.292326	0.0539727	0.438446
1981	2R	14898220	14898478	peak_10814_Young	FBgn0033982	Cyp317a1	0.25154	0.0540321	0.438461
2361	3L	3942334	3942593	peak_15998_Young	FBgn0035477	CG14982	0.200309	0.0540306	0.438461
1543	3L	1553308	1553557	peak_15148_Young	FBgn0035231	Cct2	-0.449522	0.0542803	0.439159
1755	3R	20850756	20851033	peak_27767_Young	FBgn0038834	RpS30	0.298395	0.0542991	0.439159
2192	2L	2226172	2226658	peak_979_Young	FBgn0267378	sau	0.222242	0.0541507	0.439159
2275	X	7013746	7014274	peak_34340_Young	FBgn0029929	CG4593	0.206276	0.0543024	0.439159
2316	X	5322378	5322892	peak_33845_Young	FBgn0024332	Mcm3	0.204966	0.054189	0.439159
2434	3R	10109206	10109459	peak_24555_Young	FBgn0028734	Fmr1	-0.202648	0.0543194	0.439159
2471	X	3134679	3134938	peak_33237_Young	FBgn0004647	N	0.193429	0.0542499	0.439159
2421	X	245813	246069	peak_31989_Young	FBgn0040372	G9a	0.180543	0.0543645	0.439291
1528	3R	21162646	21162895	peak_27875_Young	FBgn0038866	CG5810	-0.479561	0.0545227	0.440103
2124	X	14583513	14583772	peak_36495_Young	FBgn0030573	nmdyn-D6	0.249279	0.0545009	0.440103
2101	X	4687745	4688002	peak_33726_Old	FBgn0011760	ctp	0.229553	0.05464	0.440373
2455	2R	13222272	13222524	peak_10285_Young	FBgn0011763	Dp	0.189509	0.0545879	0.440373
2486	2L	1987393	1987889	peak_896_Young	FBgn0031381	Npc2a	0.179336	0.0546427	0.440373
1527	3L	4174412	4174661	peak_16071_Young	FBgn0040696	CG18675	-0.486584	0.0547713	0.440685
2074	3L	21131516	21131769	peak_21375_Young	FBgn0037050	CG10566	0.249025	0.0547796	0.440685
2140	3R	15485906	15486168	peak_26124_Young	FBgn0038344	CG5205	0.23106	0.0548546	0.440685
2150	3R	22584606	22584859	peak_28324_Young	FBgn0038989	CG6937	0.238819	0.0548063	0.440685
2328	2L	8541981	8542233	peak_3088_Young	FBgn0011259	Sema-1a	0.215239	0.0547155	0.440685
2329	3L	1865285	1865541	peak_15258_Young	FBgn0035285	CG12025	0.199694	0.0548321	0.440685
2343	2L	7675648	7675913	peak_2771_Young	FBgn0264087	Slob	0.204659	0.0549335	0.440854
2481	3L	7934274	7934544	peak_17183_Young	FBgn0035827	Srp9	-0.232478	0.0549201	0.440854
1530	3R	12254524	12254773	peak_25158_Young	FBgn0038008	CG3942	-0.476203	0.055054	0.441286
2207	2L	2976989	2977249	peak_1204_Young	FBgn0031484	CG3165	0.227224	0.0551319	0.441286
2308	3R	13264208	13264460	peak_25442_Young	FBgn0003598	Su(var)3-7	0.201211	0.0551297	0.441286
2393	2L	1710302	1710558	peak_803_Young	FBgn0031357	mRpL48	0.199322	0.0550194	0.441286
2475	X	2685383	2685639	peak_33083_Young	FBgn0003068	per	-0.195844	0.0551173	0.441286
2137	3R	26725087	26725339	peak_29646_Young	FBgn0040607	CG14244	0.256418	0.0552401	0.441921
1548	X	21026563	21026812	peak_38595_Mid	FBgn0031142	r-cup	0.430878	0.0554021	0.442404
1731	3R	21360038	21360296	peak_27949_Young	FBgn0261837	pre-mod(mdg4)-T	-0.30393	0.0553551	0.442404
1767	2L	13286382	13286634	peak_4428_VeryOld	FBgn0032499	Uvrag	0.30223	0.0554442	0.442404
1826	3L	17421008	17421310	peak_20124_Young	FBgn0027660	blot	-0.324073	0.0554164	0.442404
1927	3L	8290023	8290276	peak_17313_Young	FBgn0027569	cert	0.261054	0.0554744	0.442404
2280	3R	23356424	23356676	peak_28568_Young	FBgn0016119	ATPsyn-Cf6	0.20804	0.0554583	0.442404
1772	3L	4897470	4897928	peak_16316_Young	FBgn0035582	CG13705	-0.33761	0.0556123	0.442579
2106	2R	16867607	16867863	peak_11472_Young	FBgn0028737	Ef1beta	0.252157	0.0555774	0.442579
2125	3L	526768	527041	peak_14763_Young	FBgn0085298	CG34269	-0.276123	0.0555412	0.442579
2266	3L	4040177	4040429	peak_16027_Young	FBgn0035488	CG11593	0.224076	0.0555862	0.442579
2023	X	19259879	19260168	peak_38019_Young	FBgn0040068	Vav	-0.343503	0.0558507	0.444245
1608	3L	602821	603070	peak_14797_Young	FBgn0035146	CG13893	-0.383112	0.0560228	0.444948
1698	X	14919709	14920197	peak_36608_Young	FBgn0030597	Eo	-0.379412	0.0559706	0.444948
2263	3R	18198765	18199021	peak_26926_Young	FBgn0011481	Ssdp	-0.227533	0.0560375	0.444948
2385	X	9250247	9250521	peak_34957_Young	FBgn0030114	CG17754	0.21445	0.0560558	0.444948
1908	3R	11175674	11175958	peak_24827_Young	FBgn0040252	Ugt86Dh	-0.270014	0.056223	0.444952
1992	2R	10428402	10428659	peak_9433_Young	FBgn0262114	RanBPM	-0.333542	0.0562242	0.444952
2089	2R	23401938	23402448	peak_13764_Young	FBgn0034859	CG3520	0.251248	0.0562311	0.444952
2208	2L	21310732	21310995	peak_6939_Young	FBgn0000370	crc	0.218423	0.056119	0.444952
2352	2L	22982168	22982546	peak_7212_Young	FBgn0000384	cta	0.223588	0.0561836	0.444952
2420	X	8518057	8518349	peak_34762_Young	FBgn0264975	Nrg	0.202335	0.0561953	0.444952
2579	2L	21237075	21237338	peak_6913_Young	FBgn0261239	Hr39	0.179412	0.0563189	0.445301
2591	2L	4333710	4333964	peak_1649_Young	FBgn0020762	Atet	0.183331	0.0563336	0.445301
2111	2R	18095259	18095524	peak_11867_Young	FBgn0034300	CG5098	0.234744	0.0564346	0.445869
1562	3L	16283862	16284130	peak_19730_Young	FBgn0036593	CG13048	-0.493213	0.0566006	0.446025
1919	2R	17133857	17134328	peak_11562_Young	FBgn0034198	CG11400	-0.2689	0.0565605	0.446025
2018	2R	12138612	12138885	peak_9959_Young	FBgn0033683	CG18343	0.26584	0.0565846	0.446025
2373	2L	2886730	2886992	peak_1167_Young	FBgn0041111	lilli	-0.21858	0.0565646	0.446025
2492	2L	5980886	5981144	peak_2167_Young	FBgn0001942	eIF-4a	0.191854	0.0564961	0.446025
2209	2R	6016947	6017207	peak_7708_Young	FBgn0033050	Pngl	0.252325	0.0566307	0.446032
2433	X	6803491	6803743	peak_34275_Young	FBgn0029903	pod1	0.223716	0.0566674	0.446091
2345	3L	1350454	1350929	peak_15082_Young	FBgn0029514	CG9166	0.219028	0.056698	0.446102
2639	2L	21053631	21053900	peak_6848_Young	FBgn0010395	Itgbetanu	0.174941	0.0567412	0.446212
1728	3L	9760333	9760582	peak_17803_Young	FBgn0259163	CG42268	-0.327895	0.0569144	0.447343
1546	2R	7659838	7660087	peak_8358_Young	FBgn0033203	CG2070	-0.51662	0.0570877	0.448376
1589	3L	9624423	9624672	peak_17749_Young	FBgn0036018	CG3335	-0.406556	0.0571045	0.448376
2181	4	501979	502258	peak_31734_Young	FBgn0004607	zfh2	-0.3022	0.0572013	0.448905
1553	3R	18696106	18696355	peak_27087_Young	FBgn0085311	CG34282	-0.516293	0.0574805	0.449008
1581	2L	1201581	1201830	peak_624_Young	FBgn0040723	CG5011	-0.473558	0.0573394	0.449008
1632	3L	20385431	20385680	peak_21089_Young	FBgn0027565	CG5498	-0.429169	0.0574292	0.449008
1839	2R	12178428	12178692	peak_9975_Mid	FBgn0033692	wash	0.27828	0.0574259	0.449008
2175	3R	18906070	18906329	peak_27137_Young	FBgn0038659	EndoA	0.238255	0.0574662	0.449008
2465	3L	15535195	15535449	peak_19475_Young	FBgn0004396	CrebA	-0.212724	0.057335	0.449008
2537	X	21519983	21520235	peak_38778_Young	FBgn0031182	Cyp6t1	0.205603	0.0574367	0.449008
2542	3L	708122	708385	peak_14845_Young	FBgn0035158	CG13895	0.205193	0.057285	0.449008
2601	3R	8812402	8812657	peak_24121_Young	FBgn0037635	CG9837	0.183895	0.0575086	0.449008
2650	2R	21951395	21951648	peak_13187_Young	FBgn0034670	CG13488	0.185493	0.0573396	0.449008
1971	2R	16196218	16196488	peak_11258_Young	FBgn0262026	CG42837	0.257427	0.0575784	0.449323
1558	3L	20467855	20468104	peak_21134_Young	FBgn0036997	CG5955	-0.489794	0.0576459	0.44962
2333	X	10367923	10368181	peak_35296_Young	FBgn0028480	CG17841	0.204282	0.0576939	0.449765
2235	3R	18573226	18573492	peak_27044_Young	FBgn0023083	fray	0.227569	0.057742	0.44991
1775	3R	8799902	8800177	peak_24114_Mid	FBgn0037632	Tcp-1eta	0.301709	0.0578033	0.450158
2375	X	16005207	16005467	peak_36974_Young	FBgn0030721	CG12698	-0.203845	0.0578621	0.450386
2216	3R	3750214	3750470	peak_22452_Young	FBgn0069923	CG41128	0.244819	0.0579839	0.451104
2364	2L	18186882	18187454	peak_5878_Young	FBgn0267486	Ptp36E	0.209692	0.0580436	0.451109
2371	X	20391304	20391556	peak_38413_Young	FBgn0027334	l(1)G0004	0.219985	0.0580286	0.451109
1575	2R	19646844	19647093	peak_12372_Young	FBgn0034462	CG15905	-0.466782	0.0582543	0.45122
1583	3L	16328184	16328433	peak_19755_Old	FBgn0036610	CG13058	-0.471972	0.058181	0.45122
1712	2L	9011947	9012210	peak_3233_Young	FBgn0032088	CG13102	-0.34645	0.0583098	0.45122
1714	3L	16595220	16595499	peak_19840_Young	FBgn0042178	CG32165	-0.337141	0.0583031	0.45122
1781	2L	2564376	2564846	peak_1069_Young	FBgn0031432	Cyp309a1	-0.335851	0.058324	0.45122
1887	2R	16571661	16571918	peak_11381_Mid	FBgn0034139	CG4927	0.277918	0.0582297	0.45122
2178	3R	13710455	13710995	peak_25568_Young	FBgn0040076	primo-2	0.246825	0.0583227	0.45122
2194	2R	15863489	15863773	peak_11117_Young	FBgn0022160	Gpo-1	-0.266176	0.0582969	0.45122
2203	X	18116897	18117319	peak_37607_Mid	FBgn0004028	wupA	0.358277	0.0583208	0.45122
1643	3L	1777812	1778061	peak_15240_Young	FBgn0035272	mRpL46	-0.441032	0.0587197	0.451468
1655	3R	7219437	7219750	peak_23635_VeryOld	FBgn0037486	CG14605	-0.392309	0.0586904	0.451468
1798	2L	9431559	9431829	peak_3347_Mid	FBgn0011232	scat	0.346568	0.058698	0.451468
1917	3R	25686599	25687031	peak_29346_Mid	FBgn0039359	RpL27	0.310323	0.058619	0.451468
1923	2R	14165055	14165474	peak_10579_Young	FBgn0033903	CG8323	0.279241	0.0584327	0.451468
2184	X	8681970	8682247	peak_34806_Young	FBgn0030056	CG11284	0.254269	0.0587304	0.451468
2253	3L	5899370	5899642	peak_16553_Young	FBgn0052409	CG32409	0.245277	0.0587263	0.451468
2265	3L	14327323	14327590	peak_19118_Young	FBgn0036419	CG13482	-0.27188	0.0585216	0.451468
2323	3L	16660607	16661114	peak_19871_Young	FBgn0260960	Baldspot	-0.272031	0.0586867	0.451468
2335	3R	23783478	23783880	peak_28709_Young	FBgn0039120	Nup98-96	-0.279278	0.0587406	0.451468
2439	3R	8001466	8001727	peak_23857_Young	FBgn0037536	CG2698	0.203936	0.0583901	0.451468
2463	2L	7790915	7791172	peak_2797_Young	FBgn0031948	CG7149	-0.202075	0.0585133	0.451468
2547	2R	7590029	7590290	peak_8329_Young	FBgn0261385	scra	0.204799	0.0585551	0.451468
2153	3R	18669989	18670244	peak_27071_Young	FBgn0038638	CG7702	-0.268094	0.0588242	0.451657
2460	3R	28811240	28811494	peak_30319_Young	FBgn0039600	CG1646	0.202131	0.0588199	0.451657
1836	3R	4310363	4310747	peak_22539_Young	FBgn0037232	CG9791	-0.30093	0.0589157	0.452132
2704	3R	16224639	16224896	peak_26404_Young	FBgn0040071	tara	-0.254329	0.0590325	0.4528
1985	3L	11836626	11836885	peak_18421_Mid	FBgn0262366	CG43064	0.314475	0.0591202	0.453245
1594	3L	11957029	11957278	peak_18451_Young	FBgn0036230	CG11570	-0.440747	0.0591695	0.453395
1646	2R	22649780	22650029	peak_13478_Young	FBgn0085474	CG34445	-0.405344	0.0592761	0.453984
1578	2R	23349329	23349578	peak_13739_Young	FBgn0085239	CG34210	-0.579116	0.0594414	0.454639
2336	3R	23605384	23605648	peak_28639_Young	FBgn0039094	CG10184	0.21296	0.0594509	0.454639
2497	2R	7049076	7049345	peak_8096_Young	FBgn0016032	lbm	0.195141	0.0594491	0.454639
1641	3L	21267382	21267631	peak_21430_Mid	FBgn0037063	CG9391	0.4175	0.0594935	0.454737
1932	3R	29669595	29670118	peak_30631_Young	FBgn0039677	ppk30	-0.299001	0.0595847	0.455126
2096	2L	2885798	2886052	peak_1165_VeryOld	FBgn0041111	lilli	-0.254159	0.0596041	0.455126
[truncated: 6,217 more rows]

## Sheet: Mid v Young p<0.05
	seqnames	start	end	peak	annotation_name	symbol	logFC	P.Value	adj.P.Val
1	3R	11984549	11984842	peak_25081_Young	FBgn0037974	CG12224	-1.06886	6.0958e-09	9.30463e-05
2	3R	19407732	19408003	peak_27309_Mid	FBgn0038705	CG11626	0.683381	4.24214e-08	0.00032376
3	3R	4307671	4307940	peak_22538_Young	FBgn0027930	MP1	-0.659417	8.16208e-08	0.000362093
4	3R	11353091	11353351	peak_24875_Young	FBgn0026063	KP78b	-0.73091	9.48882e-08	0.000362093
5	3R	31777883	31778139	peak_31448_Young	FBgn0005632	faf	-0.713096	2.03631e-07	0.000621643
6	2L	2038907	2039171	peak_920_Young	FBgn0259230	lectin-22C	-0.91259	3.47237e-07	0.000883372
7	3L	1755612	1755873	peak_15236_Young	FBgn0035268	CG8001	-0.928032	7.86429e-07	0.0015106
8	2L	13385094	13385602	peak_4464_Old	FBgn0032517	CG7099	0.632134	8.09984e-07	0.0015106
9	3R	11980281	11980541	peak_25080_Young	FBgn0037973	CG18547	-0.721357	8.90681e-07	0.0015106
10	3R	13182280	13182775	peak_25425_Young	FBgn0038122	CG8138	0.829403	1.16677e-06	0.00178096
12	X	12031712	12031961	peak_35865_Young	FBgn0030369	Cyp318a1	-0.968908	1.51747e-06	0.0021057
11	2R	24342611	24342882	peak_14163_Young	FBgn0004101	bs	-0.885529	1.69428e-06	0.00215512
13	2L	7203594	7203932	peak_2629_Mid	FBgn0031896	CG4502	0.568109	3.42378e-06	0.00402004
14	2L	827732	827994	peak_464_Young	FBgn0031286	CG3862	-0.673785	3.86133e-06	0.00403662
15	2L	22577676	22578167	peak_7192_Mid	FBgn0040011	Slmap	0.782387	3.96681e-06	0.00403662
16	2R	22926374	22926634	peak_13586_Young	FBgn0010660	Nup214	-0.684369	4.52277e-06	0.00427803
17	3R	17394993	17395246	peak_26721_Mid	FBgn0025456	CREG	0.740696	4.76458e-06	0.00427803
18	3R	7886629	7886891	peak_23813_Young	FBgn0037526	CG10092	0.571619	6.33176e-06	0.00536933
19	2R	20698292	20698547	peak_12725_Mid	FBgn0040726	dpr	0.694466	7.05109e-06	0.00566462
20	2L	3914783	3915322	peak_1519_Young	FBgn0051773	CG31773	0.461786	1.10306e-05	0.00841857
21	2L	8528966	8529226	peak_3080_Young	FBgn0028394	CG17834	-0.557218	1.35649e-05	0.00965922
22	2L	1944585	1944860	peak_874_Mid	FBgn0040719	CG15357	0.698353	1.46853e-05	0.00965922
23	X	1692657	1692916	peak_32646_Mid	FBgn0029588	CG14798	0.590476	1.49939e-05	0.00965922
24	3L	17421383	17421646	peak_20125_Young	FBgn0027660	blot	-0.619674	1.51875e-05	0.00965922
25	X	2468820	2469075	peak_33001_Young	FBgn0040388	boi	-0.655663	2.11229e-05	0.0128968
26	3R	4387040	4387299	peak_22567_Mid	FBgn0003882	tub	0.675437	2.26386e-05	0.0129431
27	2R	17598103	17598558	peak_11733_Young	FBgn0264541	CG43920	-0.699634	2.28946e-05	0.0129431
28	2R	15147709	15147967	peak_10904_Young	FBgn0033994	CG7544	0.518441	2.54e-05	0.0134934
29	X	18634787	18635046	peak_37772_Young	FBgn0030941	wgn	-0.555797	2.5636e-05	0.0134934
30	2L	412807	413078	peak_281_Young	FBgn0263933	ebi	-0.705144	2.69797e-05	0.0136109
31	2L	413407	413678	peak_282_Young	FBgn0263933	ebi	-0.735495	2.76427e-05	0.0136109
34	X	6986809	6987058	peak_34330_Old	FBgn0261284	bou	0.727884	3.18436e-05	0.0151894
32	3L	16359714	16359973	peak_19775_Young	FBgn0266417	CG45057	-0.564955	3.56839e-05	0.0160924
33	3R	19648693	19648946	peak_27382_Mid	FBgn0051220	CG31220	0.555483	3.58452e-05	0.0160924
35	2R	5608878	5609196	peak_7534_VeryOld	FBgn0039970	CG17508	0.446479	3.76883e-05	0.0164364
36	X	6986405	6986707	peak_34329_Mid	FBgn0261284	bou	0.629617	4.33143e-05	0.0183653
38	3L	9423159	9423408	peak_17680_Young	FBgn0023129	aay	-0.832812	5.13746e-05	0.0206364
39	2R	23551717	23551968	peak_13826_Young	FBgn0010501	Dcp-1	-0.797023	5.07736e-05	0.0206364
37	2R	17162010	17162281	peak_11577_Young	FBgn0050457	CG30457	0.657711	5.29063e-05	0.0207067
40	3L	1336604	1337119	peak_15077_Young	FBgn0035211	CG2211	-0.579896	5.79482e-05	0.0215737
44	3R	3734065	3734324	peak_22447_Mid	FBgn0263977	Tim17b	0.957055	5.67927e-05	0.0215737
41	3R	12960354	12960641	peak_25347_Young	FBgn0087021	Spc25	-0.576004	6.40931e-05	0.0232933
42	2L	3771595	3771904	peak_1479_Young	FBgn0004893	bowl	-0.585784	6.64964e-05	0.0233093
43	3R	3586272	3586806	peak_22430_Mid	FBgn0010247	Parp	0.538866	6.87186e-05	0.0233093
45	2L	13128964	13129364	peak_4384_Young	FBgn0032471	CG5122	-0.617734	6.76069e-05	0.0233093
46	X	11985040	11985313	peak_35843_Young	FBgn0263111	cac	0.497252	8.33924e-05	0.0276718
47	2L	6090389	6090654	peak_2230_Young	FBgn0266445	CG45075	-0.653732	8.74645e-05	0.0284055
48	3R	26440458	26440756	peak_29529_Young	FBgn0263118	tx	-0.587481	9.46703e-05	0.0301052
49	3R	18399092	18399360	peak_26995_Young	FBgn0028670	Vha100-2	-0.51853	0.000101159	0.0311979
50	3L	18800275	18800548	peak_20534_Young	FBgn0001078	ftz-f1	-0.441848	0.000102194	0.0311979
51	2L	17497169	17497431	peak_5711_Mid	FBgn0003187	qua	0.64597	0.000113801	0.0319179
52	3R	8286980	8287261	peak_23936_Mid	FBgn0037562	CG11671	0.468324	0.000114652	0.0319179
53	3R	29780668	29780932	peak_30676_Young	FBgn0039694	fig	-0.753794	0.000114562	0.0319179
54	2R	10357498	10357772	peak_9414_Mid	FBgn0033512	CG12902	0.550845	0.000118642	0.0319179
55	2L	22018874	22019126	peak_7109_Young	FBgn0028979	tio	-0.487761	0.000117092	0.0319179
56	2L	1989480	1989741	peak_898_Young	FBgn0001125	Got2	0.459128	0.00011919	0.0319179
57	2R	23712713	23712983	peak_13888_Young	FBgn0034897	Sesn	-0.404079	0.00011831	0.0319179
58	3L	9373541	9373794	peak_17658_Young	FBgn0001228	Hsp67Bb	-0.517919	0.00012905	0.0326127
59	3R	14029003	14029273	peak_25656_Young	FBgn0038194	Cyp6d5	-0.737441	0.000134389	0.0326127
60	X	13303915	13304176	peak_36155_Young	FBgn0266375	IP3K2	-0.510009	0.000135133	0.0326127
61	2L	3771977	3772226	peak_1480_Young	FBgn0004893	bowl	-0.613153	0.000134383	0.0326127
62	X	13994992	13995265	peak_36376_Young	FBgn0000173	ben	-0.573639	0.00013854	0.0326127
63	2L	17260668	17260927	peak_5634_Mid	FBgn0032629	beat-IIIc	0.576392	0.000138877	0.0326127
64	2L	20066224	20066764	peak_6517_Mid	FBgn0045064	bwa	0.465427	0.000138867	0.0326127
69	X	9030340	9030599	peak_34874_Young	FBgn0259734	CG42388	-0.756993	0.000129482	0.0326127
65	3L	1882926	1883198	peak_15265_Young	FBgn0035287	CG13937	-0.616861	0.000146083	0.0335722
66	3R	27946790	27947073	peak_30039_Young	FBgn0039562	Gp93	-0.56939	0.000148319	0.0335722
72	3R	5565749	5566015	peak_23064_Young	FBgn0037341	CG12746	-0.761533	0.000149562	0.0335722
67	3R	11993248	11993511	peak_25090_Young	FBgn0260745	mfas	-0.635059	0.000156244	0.0341958
68	3R	8477609	8477864	peak_24005_Young	FBgn0266801	CG45263	0.460047	0.00015682	0.0341958
70	2R	7418541	7418797	peak_8250_Young	FBgn0003460	so	-0.425824	0.000161384	0.034694
71	3R	4810013	4810270	peak_22746_Young	FBgn0037279	CG1129	-0.589698	0.000164775	0.034694
73	3R	31617850	31618108	peak_31375_Young	FBgn0039861	pasha	0.50376	0.000168197	0.034694
74	X	9576497	9576763	peak_35047_Young	FBgn0259741	CG42395	-0.615161	0.000167978	0.034694
75	2L	20869993	20870258	peak_6756_Mid	FBgn0032900	CG14401	0.49864	0.000175773	0.0352721
77	2L	22169365	22169622	peak_7148_Old	FBgn0032979	Clamp	0.68655	0.000177932	0.0352721
84	X	9202253	9202502	peak_34942_Young	FBgn0086450	su(r)	-0.805663	0.000173463	0.0352721
76	2L	18185580	18185835	peak_5876_Young	FBgn0267486	Ptp36E	0.449938	0.000181336	0.035486
78	X	20690539	20690797	peak_38512_Old	FBgn0003300	run	0.539714	0.000187733	0.0360925
79	2L	17127528	17127794	peak_5610_Young	FBgn0051784	CG31784	0.516211	0.000189164	0.0360925
80	4	396170	396441	peak_31686_Young	FBgn0262636	Lin29	-0.452904	0.000205442	0.0371568
81	X	6805531	6805784	peak_34278_Young	FBgn0259228	C3G	-0.646856	0.000206914	0.0371568
82	2R	25177607	25177887	peak_14516_Mid	FBgn0004181	Peb	0.462876	0.000203578	0.0371568
83	X	6987151	6987412	peak_34331_Mid	FBgn0261284	bou	0.753403	0.000197502	0.0371568
85	2L	21379949	21380209	peak_6955_Young	FBgn0032946	nrv3	0.471659	0.000204996	0.0371568
86	X	1026599	1026856	peak_32296_Young	FBgn0040337	CG3021	0.430154	0.000219989	0.0390454
87	3L	1882630	1882881	peak_15264_Young	FBgn0035287	CG13937	-0.57129	0.000230114	0.0397179
88	3L	5655765	5656037	peak_16487_Young	FBgn0085447	sif	-0.417519	0.00022811	0.0397179
89	3R	31038359	31038633	peak_31146_Young	FBgn0010015	CanA1	-0.62983	0.000231584	0.0397179
91	3R	7548299	7548555	peak_23735_Young	FBgn0015568	alpha-Est1	-0.577717	0.000244061	0.0413927
90	X	12074532	12074975	peak_35874_Mid	FBgn0030373	CG12721	0.542921	0.00025069	0.0420499
93	3R	31462647	31463349	peak_31314_Young	FBgn0039850	CG11333	0.390922	0.000262234	0.043508
92	2R	14212850	14213116	peak_10603_Young	FBgn0005613	Sox15	-0.539528	0.000277228	0.0455012
95	3R	26714085	26714635	peak_29641_Young	FBgn0023179	amon	0.553662	0.000288333	0.0468204
94	3R	25851207	25851464	peak_29378_Young	FBgn0039379	CG5886	0.424208	0.000293007	0.0470785
96	4	796739	797220	peak_31831_Mid	FBgn0039939	CG11231	0.722988	0.000303447	0.0482481
97	2L	12823928	12824191	peak_4294_Mid	FBgn0015399	kek1	0.56163	0.000315475	0.0491368
98	2L	21053257	21053521	peak_6847_Mid	FBgn0010395	Itgbetanu	0.447724	0.000314991	0.0491368

## Sheet: Old v Young
	seqnames	start	end	peak	annotation_name	symbol	logFC	P.Value	adj.P.Val
1	3R	11353091	11353351	peak_24875_Young	FBgn0026063	KP78b	-1.48516	2.07293e-14	3.16411e-10
2	3R	4307671	4307940	peak_22538_Young	FBgn0027930	MP1	-0.952626	2.97313e-11	1.51273e-07
3	3R	11984549	11984842	peak_25081_Young	FBgn0037974	CG12224	-1.6043	2.77566e-11	1.51273e-07
4	2L	22018874	22019126	peak_7109_Young	FBgn0028979	tio	-0.990366	2.75393e-10	1.0509e-06
5	3R	11980281	11980541	peak_25080_Young	FBgn0037973	CG18547	-1.16882	5.55892e-10	1.69703e-06
6	2L	4476967	4477251	peak_1698_Young	FBgn0011603	ine	-0.939467	8.3441e-10	2.12274e-06
7	3L	10769914	10770311	peak_18048_Young	FBgn0262890	CG43245	-1.17901	1.33784e-09	2.91725e-06
8	2L	19423419	19423683	peak_6321_Young	FBgn0032779	CG16771	-0.758952	3.69505e-09	7.05016e-06
12	3L	1882926	1883198	peak_15265_Young	FBgn0035287	CG13937	-1.41333	5.02706e-09	8.28589e-06
14	X	12031712	12031961	peak_35865_Young	FBgn0030369	Cyp318a1	-1.68013	5.42839e-09	8.28589e-06
9	2L	21656733	21656998	peak_6990_VeryOld	FBgn0032956	Cul2	1.11162	6.50452e-09	9.02591e-06
10	2L	13385094	13385602	peak_4464_Old	FBgn0032517	CG7099	0.785476	8.12167e-09	9.60295e-06
11	X	18634787	18635046	peak_37772_Young	FBgn0030941	wgn	-0.939686	8.17862e-09	9.60295e-06
13	3R	29682368	29682665	peak_30635_Young	FBgn0013972	Gycalpha99B	-0.747909	1.02669e-08	1.11938e-05
15	3L	15699810	15700086	peak_19538_Young	FBgn0041160	comm2	-0.697723	2.25721e-08	2.25089e-05
16	2L	21828356	21828618	peak_7047_Young	FBgn0003866	tsh	-0.794166	2.35943e-08	2.25089e-05
17	2R	21613012	21613274	peak_13062_Old	FBgn0034639	CG15673	0.737389	2.90067e-08	2.60446e-05
18	2L	20494486	20494754	peak_6627_Young	FBgn0054007	CG34007	-0.80211	3.2028e-08	2.71597e-05
19	X	2251481	2251962	peak_32895_Mid	FBgn0000377	crn	0.874983	5.68409e-08	4.56642e-05
20	2L	3771595	3771904	peak_1479_Young	FBgn0004893	bowl	-0.992414	6.50993e-08	4.96838e-05
21	3L	16359714	16359973	peak_19775_Young	FBgn0266417	CG45057	-0.866875	7.56746e-08	5.25044e-05
22	2L	2038907	2039171	peak_920_Young	FBgn0259230	lectin-22C	-1.06237	7.2767e-08	5.25044e-05
23	2L	14025754	14026003	peak_4672_Young	FBgn0028519	CG4500	-0.72519	1.26694e-07	8.40805e-05
24	3L	15234414	15234670	peak_19402_Young	FBgn0029114	Tollo	-0.657702	1.37817e-07	8.76517e-05
25	X	11925571	11925840	peak_35834_Young	FBgn0030357	Sclp	-0.948112	1.65041e-07	0.000100767
26	X	11925086	11925344	peak_35833_Young	FBgn0030357	Sclp	-0.764626	2.22756e-07	0.000130775
27	3L	17421383	17421646	peak_20125_Young	FBgn0027660	blot	-0.846002	2.38774e-07	0.000134987
29	3L	1882630	1882881	peak_15264_Young	FBgn0035287	CG13937	-1.02017	2.62618e-07	0.000138228
31	3L	1882079	1882357	peak_15263_Young	FBgn0035287	CG13937	-1.12986	2.56495e-07	0.000138228
32	3R	9869999	9870248	peak_24457_Young	FBgn0037766	Teh1	-1.12131	2.87733e-07	0.000146399
28	2L	20494895	20495149	peak_6628_Young	FBgn0054007	CG34007	-0.815707	3.01962e-07	0.000148682
30	3L	13939046	13939433	peak_19004_Young	FBgn0052137	CG32137	-0.752674	3.56655e-07	0.000170124
33	2L	11155640	11155902	peak_3882_Young	FBgn0032350	CG6287	-0.837536	4.55532e-07	0.000210704
34	3L	1755612	1755873	peak_15236_Young	FBgn0035268	CG8001	-0.985038	5.87057e-07	0.000256024
35	2R	20533140	20533403	peak_12677_Young	FBgn0034512	CG18067	-0.579942	5.84228e-07	0.000256024
36	2R	14964527	14964799	peak_10844_Young	FBgn0261854	aPKC	-0.617211	6.96883e-07	0.000295478
39	3L	9423159	9423408	peak_17680_Young	FBgn0023129	aay	-1.27923	7.36443e-07	0.000303813
37	X	4323930	4324193	peak_33610_Young	FBgn0040907	mRpL33	-0.708855	8.32809e-07	0.000334526
38	2L	19423932	19424190	peak_6322_Young	FBgn0032779	CG16771	-0.578411	8.67481e-07	0.000339519
40	3R	13812834	13813094	peak_25599_Young	FBgn0259730	tal-1A	-0.70546	9.22013e-07	0.000342994
41	3L	15728317	15728571	peak_19549_Young	FBgn0010105	comm	-0.62916	9.24707e-07	0.000342994
42	2L	18155895	18156160	peak_5867_Young	FBgn0032670	CG5783	-0.722137	9.43774e-07	0.000342994
43	4	396170	396441	peak_31686_Young	FBgn0262636	Lin29	-0.682595	1.18196e-06	0.000419568
44	3L	15976860	15977126	peak_19613_Young	FBgn0036551	CG17029	-0.804304	1.21277e-06	0.000420721
45	3R	19906088	19906349	peak_27482_Young	FBgn0038747	RhoGAP92B	-0.588796	1.39888e-06	0.000471254
49	2L	3771977	3772226	peak_1480_Young	FBgn0004893	bowl	-0.938828	1.42018e-06	0.000471254
46	3R	30765496	30765762	peak_31054_Young	FBgn0004606	zfh1	-0.811368	1.54378e-06	0.000480903
47	2L	13128964	13129364	peak_4384_Young	FBgn0032471	CG5122	-0.871164	1.483e-06	0.000480903
48	2R	5608878	5609196	peak_7534_VeryOld	FBgn0039970	CG17508	0.544406	1.53762e-06	0.000480903
50	3R	4810013	4810270	peak_22746_Young	FBgn0037279	CG1129	-0.856435	1.75423e-06	0.000535531
51	2L	3706954	3707214	peak_1446_Young	FBgn0051777	CG31777	0.661659	1.83796e-06	0.00055009
52	X	19665706	19665978	peak_38182_Young	FBgn0004057	Zw	-0.793585	1.92634e-06	0.000565456
53	2R	8647801	8648069	peak_8765_Young	FBgn0003892	ptc	-0.761199	2.35521e-06	0.000665741
54	3R	14108470	14108739	peak_25687_Young	FBgn0038202	CG12402	-0.661053	2.31919e-06	0.000665741
55	3R	29255734	29255999	peak_30525_Young	FBgn0267104	CG45544	-0.635681	2.67257e-06	0.000741711
56	2L	15748050	15748301	peak_5231_Young	FBgn0010382	CycE	-0.645923	2.76962e-06	0.000754918
57	3R	23386075	23386338	peak_28580_Young	FBgn0039075	CG4393	-0.617556	3.26618e-06	0.000864757
58	2R	22926374	22926634	peak_13586_Young	FBgn0010660	Nup214	-0.734381	3.28589e-06	0.000864757
62	3L	19292486	19292758	peak_20718_Young	FBgn0028380	fal	-1.02134	3.92376e-06	0.00101512
59	2L	18156211	18156470	peak_5868_Young	FBgn0032670	CG5783	-0.63506	4.2375e-06	0.00105552
60	2L	16485723	16485983	peak_5412_Young	FBgn0005677	dac	-0.680984	4.28734e-06	0.00105552
61	3L	11065884	11066139	peak_18167_Young	FBgn0025355	SuUR	-0.632096	4.24328e-06	0.00105552
63	X	1513644	1514248	peak_32554_Young	FBgn0025393	CG14795	-0.785063	4.46642e-06	0.00106524
64	2L	13290686	13290954	peak_4431_Young	FBgn0051729	CG31729	-0.564705	4.42424e-06	0.00106524
65	2R	7039895	7040168	peak_8090_Young	FBgn0053914	CG33914	-0.742089	4.77765e-06	0.00112194
66	X	6805531	6805784	peak_34278_Young	FBgn0259228	C3G	-0.911272	5.32903e-06	0.00123246
67	3R	15548151	15548411	peak_26150_Young	FBgn0038349	AOX3	-0.695657	6.82071e-06	0.0015539
68	3L	1204302	1204595	peak_15015_Young	FBgn0035189	CG9119	-0.613583	8.27215e-06	0.00185685
69	2L	827732	827994	peak_464_Young	FBgn0031286	CG3862	-0.661505	8.75158e-06	0.001936
70	3L	15729264	15729547	peak_19550_Young	FBgn0010105	comm	-0.760749	9.71761e-06	0.002119
71	X	15689754	15690008	peak_36853_VeryOld	FBgn0030667	CG15599	0.645901	1.0218e-05	0.00219672
73	2R	21250915	21251191	peak_12930_Young	FBgn0034606	ASPP	-0.515853	1.05568e-05	0.00223804
72	3R	11993248	11993511	peak_25090_Young	FBgn0260745	mfas	-0.84547	1.07432e-05	0.00224635
74	X	3176183	3176467	peak_33252_Young	FBgn0000479	dnc	-0.645051	1.17763e-05	0.00242911
76	3R	21246650	21246905	peak_27910_Young	FBgn0038874	ETHR	-0.591351	1.21624e-05	0.0024753
75	X	20690539	20690797	peak_38512_Old	FBgn0003300	run	0.659263	1.25809e-05	0.00252677
78	2L	117831	118091	peak_157_Young	FBgn0031219	CG13694	0.718176	1.33558e-05	0.00264757
77	2R	11529527	11529790	peak_9776_Young	FBgn0000577	en	-0.670407	1.3573e-05	0.00265613
79	2R	23925062	23925328	peak_13963_VeryOld	FBgn0034931	CG2812	0.785587	1.48123e-05	0.00282618
80	3R	15476334	15476629	peak_26122_Young	FBgn0038341	AdamTS-A	-0.53391	1.46417e-05	0.00282618
81	2R	7418541	7418797	peak_8250_Young	FBgn0003460	so	-0.516407	1.56382e-05	0.00294693
82	X	18832432	18832692	peak_37854_Young	FBgn0030964	Pvf1	-0.520641	1.66159e-05	0.00309298
83	3R	11353519	11353791	peak_24876_Young	FBgn0026063	KP78b	-0.469747	1.72152e-05	0.00316594
85	2L	11842174	11842708	peak_4052_Young	FBgn0040968	CG14933	-0.512056	1.91102e-05	0.0034726
84	2R	10423578	10424018	peak_9430_Young	FBgn0033520	Prx2540-1	-0.799274	1.95829e-05	0.00351663
86	3L	16091294	16091575	peak_19663_Young	FBgn0036565	CG5235	-0.724652	2.05046e-05	0.00356349
88	2R	6880856	6881112	peak_8026_Young	FBgn0033113	Spn42Dc	-0.474099	2.05442e-05	0.00356349
90	X	7607976	7608466	peak_34468_Young	FBgn0004198	ct	-0.542692	2.02693e-05	0.00356349
87	2L	3803338	3803591	peak_1489_Young	FBgn0021800	Reph	-0.573993	2.16624e-05	0.00365617
89	2L	6090389	6090654	peak_2230_Young	FBgn0266445	CG45075	-0.759337	2.17971e-05	0.00365617
91	2L	20716054	20716335	peak_6685_Young	FBgn0014859	Hr38	-0.55197	2.16167e-05	0.00365617
92	3R	26440458	26440756	peak_29529_Young	FBgn0263118	tx	-0.6823	2.47988e-05	0.0040702
93	3R	15547530	15547835	peak_26149_Young	FBgn0038349	AOX3	-0.525998	2.46311e-05	0.0040702
94	X	18083958	18084231	peak_37592_Young	FBgn0030891	dik	-0.826973	2.71001e-05	0.00440059
95	3R	17557520	17557793	peak_26760_Young	FBgn0264005	Hmx	-0.654196	2.84014e-05	0.00455711
96	3R	31777883	31778139	peak_31448_Young	FBgn0005632	faf	-0.542327	2.86611e-05	0.00455711
97	X	11442228	11442557	peak_35656_Young	FBgn0030300	Sk1	-0.482625	2.95981e-05	0.00465758
99	3R	19212834	19213229	peak_27251_Young	FBgn0025680	cry	-0.44907	3.1638e-05	0.00492779
100	X	13994992	13995265	peak_36376_Young	FBgn0000173	ben	-0.658656	3.42911e-05	0.00528706
98	2L	21148287	21148543	peak_6879_VeryOld	FBgn0086251	del	0.744431	3.52845e-05	0.0053325
101	2R	13424856	13425118	peak_10326_Young	FBgn0265272	CG30060	-0.618096	3.52533e-05	0.0053325
102	X	8806642	8806902	peak_34834_Young	FBgn0026411	Lim1	-0.597924	3.57476e-05	0.00534952
103	X	13404541	13404803	peak_36201_Young	FBgn0030484	GstT4	-0.661696	3.77622e-05	0.00556095
105	3R	14624409	14624691	peak_25833_Young	FBgn0013981	His4r	-0.518612	3.78891e-05	0.00556095
104	3R	22369016	22369269	peak_28257_Young	FBgn0038951	CG5380	-0.563058	3.91715e-05	0.00569441
106	2R	23042973	23043242	peak_13621_Young	FBgn0261705	CG42741	-0.466381	3.97908e-05	0.00572988
107	2L	13205009	13205274	peak_4407_Young	FBgn0032481	CG16972	-0.645591	4.40595e-05	0.00626735
108	3L	7131616	7131875	peak_16927_Young	FBgn0010387	Dbi	-0.605277	4.43445e-05	0.00626735
112	3R	15537253	15537520	peak_26147_Young	FBgn0267408	AOX1	-0.461301	4.55729e-05	0.00638187
113	X	7709298	7709558	peak_34509_Young	FBgn0029504	CHES-1-like	-0.520019	4.71694e-05	0.00654539
109	3R	7886629	7886891	peak_23813_Young	FBgn0037526	CG10092	0.514134	4.76225e-05	0.00654873
110	3L	1102376	1102660	peak_14978_Young	FBgn0004870	bab1	-0.581453	4.82633e-05	0.0065776
111	2R	20698292	20698547	peak_12725_Mid	FBgn0040726	dpr	0.633006	5.00066e-05	0.00675488
119	3R	4773308	4773566	peak_22723_Old	FBgn0264907	CG44098	0.87304	5.46543e-05	0.00731792
114	2R	6740631	6740891	peak_7956_Mid	FBgn0028579	phtf	0.852445	5.59173e-05	0.00740863
115	3L	20695476	20695752	peak_21203_Young	FBgn0001320	kni	-0.609286	5.68191e-05	0.00740863
116	2L	7581106	7581361	peak_2740_Young	FBgn0083141	Spn28B	-0.677923	5.75047e-05	0.00740863
117	2R	14358039	14358325	peak_10659_Old	FBgn0033925	CG8617	0.796475	5.77586e-05	0.00740863
118	3R	12960354	12960641	peak_25347_Young	FBgn0087021	Spc25	-0.608087	5.74169e-05	0.00740863
120	3R	7548299	7548555	peak_23735_Young	FBgn0015568	alpha-Est1	-0.694654	6.15387e-05	0.00782772
123	X	21067510	21067768	peak_38618_Young	FBgn0052512	CG32512	-0.563972	6.25176e-05	0.00788652
121	2R	24342611	24342882	peak_14163_Young	FBgn0004101	bs	-0.7155	6.30557e-05	0.0078892
138	3R	4236114	4236363	peak_22503_Young	FBgn0010225	Gel	-1.1585	6.43377e-05	0.00798415
122	2L	15747486	15747741	peak_5230_Young	FBgn0010382	CycE	-0.653385	6.69327e-05	0.00810842
124	2R	6811750	6812132	peak_7996_Young	FBgn0265003	koi	-0.505981	6.59929e-05	0.00810842
127	3R	31194875	31195137	peak_31194_Young	FBgn0039827	CG1544	-0.539282	6.64204e-05	0.00810842
125	X	5419655	5419944	peak_33864_Mid	FBgn0029763	CG4165	-0.608437	6.88045e-05	0.00826954
130	X	18857407	18857672	peak_37864_Young	FBgn0030969	CG7288	-0.497922	7.03873e-05	0.00832862
132	3L	13477287	13477549	peak_18899_Young	FBgn0086708	stv	-0.45766	7.03758e-05	0.00832862
126	4	625977	626254	peak_31776_Old	FBgn0039914	mav	0.723939	7.18808e-05	0.00843991
129	X	16063912	16064194	peak_36978_Old	FBgn0030723	dpr18	0.880126	7.26201e-05	0.00846163
128	2R	13546368	13546639	peak_10378_Mid	FBgn0033853	CG6145	0.607644	7.46374e-05	0.0086308
131	3R	10850497	10850835	peak_24755_Young	FBgn0037841	CG4565	-0.575009	7.76126e-05	0.00890736
133	2R	21201004	21201333	peak_12914_Young	FBgn0265180	CG44245	-0.658258	8.43305e-05	0.00958304
139	3L	1349577	1349843	peak_15080_Young	FBgn0029514	CG9166	-0.472533	8.47557e-05	0.00958304
135	4	358873	359138	peak_31669_Young	FBgn0039904	Hcf	0.546582	8.70099e-05	0.00976558
134	2L	16451044	16451318	peak_5406_Young	FBgn0020414	Idgf3	-0.790698	8.79502e-05	0.00979524
136	2L	22169365	22169622	peak_7148_Old	FBgn0032979	Clamp	0.741912	8.85576e-05	0.00979524
141	2L	480504	480774	peak_318_Old	FBgn0043364	cbt	0.434627	8.94464e-05	0.00982237
137	3R	29256372	29256663	peak_30526_Young	FBgn0267104	CG45544	-0.829965	9.0198e-05	0.00983416
149	2R	24767578	24767833	peak_14343_Young	FBgn0027590	GstE12	0.389686	9.23631e-05	0.0099988
140	3L	223678	223929	peak_14628_Young	FBgn0053229	CG33229	0.504493	9.4481e-05	0.010156
142	2R	19881109	19881382	peak_12447_Young	FBgn0034477	CG13872	-0.595421	9.79201e-05	0.0104252
143	2L	1708198	1708476	peak_801_Young	FBgn0031357	mRpL48	-0.645731	9.90344e-05	0.0104252
148	3L	17238176	17238440	peak_20079_Young	FBgn0260943	Rbp6	-0.465114	9.86011e-05	0.0104252
147	2L	1649860	1650117	peak_785_Young	FBgn0086758	chinmo	-0.524682	0.000102795	0.0107471
145	2L	18944744	18945014	peak_6124_Young	FBgn0032723	ssp3	-0.494153	0.000104661	0.0108676
144	2R	8598658	8598907	peak_8740_Young	FBgn0267792	rgr	-0.74232	0.000106306	0.0109639
150	3R	4387040	4387299	peak_22567_Mid	FBgn0003882	tub	0.623495	0.000108704	0.0111359
146	2L	16793989	16794267	peak_5535_Young	FBgn0040262	Ugt36Ba	-0.620995	0.000110923	0.0112875
151	3L	12147022	12147285	peak_18526_Young	FBgn0013997	Nrx-IV	-0.537291	0.000111686	0.0112899
153	3L	7808820	7809081	peak_17138_Young	FBgn0052369	CG32369	-0.486384	0.00011406	0.0114541
152	X	1692657	1692916	peak_32646_Mid	FBgn0029588	CG14798	0.530814	0.000116685	0.0116184
160	3R	12595822	12596122	peak_25266_Young	FBgn0038063	Octbeta2R	-0.414877	0.00011722	0.0116184
158	3L	15235383	15235635	peak_19403_Young	FBgn0029114	Tollo	-0.440131	0.000120899	0.0119059
156	3L	6789891	6790150	peak_16850_Young	FBgn0086680	vvl	-0.46629	0.000123776	0.012111
154	3L	21808039	21808359	peak_21657_Young	FBgn0000560	eg	-0.823411	0.000128457	0.0122535
155	3R	27706240	27706507	peak_29976_Young	FBgn0039544	CG12877	-0.517443	0.000129014	0.0122535
159	2R	10617483	10617740	peak_9509_Young	FBgn0033538	CG11883	-0.436717	0.000129246	0.0122535
164	2L	21899489	21899748	peak_7076_Young	FBgn0032965	CG11629	-0.479117	0.000128569	0.0122535
169	X	580607	580860	peak_32104_Young	FBgn0261930	vnd	0.338987	0.000128181	0.0122535
157	2R	24335584	24335887	peak_14161_Young	FBgn0005638	slbo	-0.719648	0.000145255	0.0135909
162	3L	3246476	3246743	peak_15758_Old	FBgn0263246	CG43389	0.582892	0.000145039	0.0135909
165	X	21045446	21045700	peak_38605_Young	FBgn0031148	Cbs	-0.520267	0.000146023	0.0135909
161	3R	11352378	11352627	peak_24874_Young	FBgn0026063	KP78b	-0.931664	0.000147441	0.0136397
167	2L	6178988	6179259	peak_2263_Young	FBgn0085409	CG34380	-0.477301	0.000148993	0.0137002
163	2L	6663792	6664049	peak_2440_VeryOld	FBgn0000392	cup	0.626714	0.000155137	0.0139295
166	4	834256	834520	peak_31844_Young	FBgn0039938	Sox102F	0.572011	0.000153175	0.0139295
172	3L	2632572	2632967	peak_15541_Young	FBgn0035357	MEP-1	-0.49775	0.000153329	0.0139295
175	X	4411445	4411705	peak_33626_Young	FBgn0000179	bi	-0.451938	0.000154949	0.0139295
171	3L	18890914	18891189	peak_20578_Young	FBgn0036821	CG3961	-0.502478	0.000162115	0.0144709
176	3R	10109206	10109459	peak_24555_Young	FBgn0028734	Fmr1	-0.436456	0.000165468	0.0146843
168	2R	25130029	25130304	peak_14500_VeryOld	FBgn0050430	CG30430	0.747076	0.000170093	0.0147993
173	2R	24616061	24616324	peak_14289_Young	FBgn0035040	CG4741	0.498646	0.000168907	0.0147993
174	X	1286226	1286496	peak_32428_Young	FBgn0025642	CG32812	0.476734	0.000170642	0.0147993
178	X	1274105	1274375	peak_32419_Young	FBgn0028550	Atf3	0.433702	0.000168401	0.0147993
170	X	19259879	19260168	peak_38019_Young	FBgn0040068	Vav	-0.838856	0.000173325	0.0149471
179	X	15448136	15448394	peak_36762_Young	FBgn0014455	Ahcy13	-0.432609	0.000178549	0.0153111
177	3L	6988905	6989164	peak_16893_Young	FBgn0045759	bin	-0.486452	0.000180996	0.0154342
180	3R	4360787	4361066	peak_22558_Young	FBgn0037238	CG1090	-0.463633	0.000182844	0.0155052
181	2L	8528966	8529226	peak_3080_Young	FBgn0028394	CG17834	-0.470908	0.000186896	0.0157612
188	X	5560532	5560788	peak_33888_Young	FBgn0263512	Vsx2	-0.422991	0.000191537	0.0160638
187	3R	22998203	22998471	peak_28446_Young	FBgn0263390	Nha2	-0.395179	0.00019719	0.0164476
182	X	11441649	11441920	peak_35655_Young	FBgn0030300	Sk1	-0.534858	0.000203813	0.0169076
185	2L	5805236	5805500	peak_2105_Young	FBgn0031741	CG11034	-0.516306	0.000212823	0.0175597
183	3R	29681390	29681653	peak_30634_Young	FBgn0013972	Gycalpha99B	-0.642601	0.000225386	0.0183444
184	2R	10042278	10042573	peak_9289_VeryOld	FBgn0085249	CG34220	0.826336	0.000225939	0.0183444
186	2L	413407	413678	peak_282_Young	FBgn0263933	ebi	-0.642555	0.00022425	0.0183444
192	3L	15691638	15691896	peak_19536_Young	FBgn0085480	CG34451	-0.439362	0.000239275	0.0193243
190	2L	7701956	7702250	peak_2781_Mid	FBgn0041181	Tep3	0.55453	0.000248107	0.0199321
189	3R	6210181	6210450	peak_23327_Young	FBgn0037410	Osi2	-0.69332	0.000254627	0.0203488
191	3R	31038359	31038633	peak_31146_Young	FBgn0010015	CanA1	-0.663515	0.000265146	0.0210791
203	X	579861	580159	peak_32103_Young	FBgn0261930	vnd	0.340362	0.000271418	0.0214659
193	X	6804626	6804875	peak_34277_Young	FBgn0029903	pod1	-0.68234	0.000279689	0.022006
196	2L	412807	413078	peak_281_Young	FBgn0263933	ebi	-0.602409	0.000282651	0.0221251
194	2L	16716443	16716717	peak_5493_Young	FBgn0086907	Cyt-c-d	-0.566389	0.00028997	0.0225822
215	3R	26006046	26006717	peak_29419_Young	FBgn0002733	E(spl)mbeta-HLH	0.278427	0.000291576	0.0225919
197	2L	1944585	1944860	peak_874_Mid	FBgn0040719	CG15357	0.585244	0.000299724	0.023106
195	3R	3734065	3734324	peak_22447_Mid	FBgn0263977	Tim17b	0.885415	0.000304622	0.0233656
201	X	8709488	8709764	peak_34816_Young	FBgn0041629	Hexo2	-0.452826	0.000309876	0.0236498
198	3R	27698844	27699112	peak_29969_Young	FBgn0045862	btz	-0.530463	0.000323991	0.0244513
202	3R	27946790	27947073	peak_30039_Young	FBgn0039562	Gp93	-0.547401	0.000325185	0.0244513
206	2R	1590402	1590671	peak_7316_Young	FBgn0039993	CG17691	-0.446926	0.000324951	0.0244513
208	X	19850931	19851192	peak_38257_Young	FBgn0031078	Nup205	-0.436891	0.000328113	0.0245506
210	3R	6351759	6352024	peak_23383_Young	FBgn0267698	Pak	-0.408837	0.00034356	0.025581
199	3R	13450229	13450532	peak_25495_Young	FBgn0038156	CG14372	-0.74984	0.000350056	0.0259382
200	3R	26798192	26798443	peak_29657_Young	FBgn0262473	Tl	-0.582291	0.000351992	0.0259556
207	X	9284297	9284555	peak_34971_Young	FBgn0002576	lz	-0.466167	0.00035849	0.0261958
213	3L	224025	224278	peak_14629_Young	FBgn0053229	CG33229	0.369228	0.000358682	0.0261958
204	3R	22528018	22528297	peak_28308_Young	FBgn0038981	CG5346	-0.53691	0.000370403	0.0268034
205	2L	16791350	16791631	peak_5534_Young	FBgn0032603	CG17928	-0.547083	0.000370514	0.0268034
214	3R	20564009	20564271	peak_27664_Young	FBgn0038804	CG10877	0.432897	0.000376029	0.0270741
209	3L	6162795	6163044	peak_16634_Old	FBgn0035687	CG13296	0.870836	0.000380822	0.0272905
220	3L	184275	184781	peak_14607_Young	FBgn0083992	Mkp	0.41643	0.000384584	0.0274313
211	3R	13611124	13611373	peak_25526_Old	FBgn0038160	CG9759	0.954829	0.000390096	0.027695
219	3R	18394922	18395180	peak_26989_Young	FBgn0264751	CG44009	-0.45148	0.000407651	0.0288073
212	3L	1202783	1203090	peak_15012_Young	FBgn0063667	CG32335	-0.52834	0.000423811	0.0298113
224	3L	12468078	12468340	peak_18599_Young	FBgn0000625	eyg	-0.414806	0.000428196	0.0299816
218	X	21629497	21629755	peak_38808_Young	FBgn0024807	DIP1	-0.455134	0.000437467	0.0304909
227	2L	11445598	11445869	peak_3957_Young	FBgn0261648	salm	-0.469251	0.00043964	0.030503
216	4	396507	396769	peak_31687_Young	FBgn0262636	Lin29	-0.541619	0.000444319	0.0306881
229	3R	30388051	30388337	peak_30914_Old	FBgn0015221	Fer2LCH	0.375816	0.000451561	0.0310479
217	2R	10428402	10428659	peak_9433_Young	FBgn0262114	RanBPM	-0.73962	0.000465676	0.0318748
223	2L	20091093	20091355	peak_6530_Young	FBgn0032846	CG10721	-0.486513	0.000477298	0.0321895
225	2L	13802250	13802527	peak_4585_Young	FBgn0027844	CAH1	-0.462621	0.000478709	0.0321895
231	2L	6494445	6494711	peak_2390_Young	FBgn0031824	CG9547	-0.399431	0.00047786	0.0321895
236	2L	131825	132082	peak_165_Young	FBgn0001142	Gs1	0.387886	0.000474503	0.0321895
221	3R	30764214	30764483	peak_31053_Young	FBgn0004606	zfh1	-0.634526	0.000501567	0.0334319
228	X	20173776	20174035	peak_38363_Young	FBgn0000084	AnxB10	-0.484352	0.000499426	0.0334319
226	2L	18114387	18114675	peak_5844_Young	FBgn0032665	CG15152	-0.539778	0.000510645	0.0338891
222	2L	10543225	10543492	peak_3720_Young	FBgn0051721	Trim9	-0.661257	0.000514105	0.033971
238	3R	30532341	30532597	peak_30972_Young	FBgn0082582	tmod	-0.472521	0.00052233	0.0342685
243	3L	16667933	16668247	peak_19873_Young	FBgn0010223	Galphaf	0.417298	0.000523097	0.0342685
239	3L	12580414	12580682	peak_18634_Young	FBgn0015904	ara	-0.419116	0.000534535	0.0348681
232	3L	4362909	4363183	peak_16128_Young	FBgn0035534	mRpS6	-0.544265	0.000536897	0.0348732
234	X	2589166	2589442	peak_33043_Young	FBgn0001404	egh	-0.475346	0.000541229	0.0350056
233	3L	6261435	6261729	peak_16668_Young	FBgn0001258	ImpL3	-0.549186	0.000555525	0.0357786
242	X	9578795	9579047	peak_35048_Young	FBgn0052699	CG32699	-0.409772	0.000562984	0.0361067
230	2R	20698565	20698830	peak_12726_Old	FBgn0040726	dpr	0.709762	0.0005687	0.0363207
235	2L	16358103	16358352	peak_5391_Young	FBgn0025678	CaBP1	-0.846549	0.000589185	0.0374456
237	2R	20236063	20236331	peak_12584_Young	FBgn0034485	CG11099	-0.499871	0.00059122	0.0374456
245	3R	14655319	14655571	peak_25847_Mid	FBgn0086686	l(3)L1231	0.418862	0.000595324	0.0375497
247	2R	20666583	20666868	peak_12717_Young	FBgn0034542	Fem-1	-0.444338	0.000604922	0.0379179
252	2L	16486052	16486314	peak_5413_Young	FBgn0032585	CG4580	-0.434069	0.00060613	0.0379179
251	2R	24813733	24813992	peak_14364_Young	FBgn0000157	Dll	-0.409523	0.000628144	0.0391347
246	2L	8703307	8703573	peak_3138_Old	FBgn0032061	CG9314	0.468942	0.000630807	0.0391408
258	X	529802	530059	peak_32088_Young	FBgn0000108	Appl	0.365104	0.000642713	0.039558
259	2L	6380689	6380960	peak_2348_Young	FBgn0031808	CG9507	0.366118	0.000642257	0.039558
240	2R	11397685	11397946	peak_9744_Young	FBgn0082585	sprt	-0.611274	0.000657678	0.0402022
241	3L	4402891	4403142	peak_16138_Old	FBgn0035540	Syx17	0.626407	0.000658448	0.0402022
244	X	126649	126909	peak_31961_Old	FBgn0025836	RhoGAP1A	0.663887	0.000673265	0.0409431
249	2R	20617733	20617996	peak_12700_Young	FBgn0034527	CG9945	0.546333	0.000679135	0.0411362
267	X	581149	581427	peak_32105_Young	FBgn0261930	vnd	0.339245	0.000682059	0.04115
248	2R	16343320	16343609	peak_11314_Young	FBgn0034118	Nup62	-0.544411	0.000698785	0.0419931
260	3R	19407732	19408003	peak_27309_Mid	FBgn0038705	CG11626	0.393683	0.000702192	0.0420324
266	X	7573168	7573438	peak_34456_Young	FBgn0029951	CG11369	-0.48928	0.000729623	0.0435038
250	3R	24389990	24390239	peak_28933_Old	FBgn0039198	CG5768	0.76402	0.000738915	0.0435439
262	X	437649	437908	peak_32046_Young	FBgn0011822	pcl	0.46067	0.000735714	0.0435439
264	3R	6791481	6791738	peak_23530_Young	FBgn0000439	Dfd	-0.451656	0.000741707	0.0435439
276	3L	12693196	12693586	peak_18670_Young	FBgn0014343	mirr	-0.387238	0.0007366	0.0435439
257	3R	14363220	14363476	peak_25757_Old	FBgn0051320	CG31320	0.494761	0.000750861	0.0439124
274	2L	21899216	21899473	peak_7075_Young	FBgn0032965	CG11629	-0.433221	0.000755139	0.0439941
253	3R	5565749	5566015	peak_23064_Young	FBgn0037341	CG12746	-0.685565	0.000765137	0.044323
277	3R	29556096	29556355	peak_30603_Young	FBgn0000492	Dr	-0.381749	0.000766593	0.044323
254	2L	16543944	16544210	peak_5437_Young	FBgn0259735	CG42389	-0.608491	0.000782039	0.0450455
268	3L	19496992	19497267	peak_20779_Young	FBgn0036875	CG9449	-0.449592	0.000786726	0.0451451
256	3L	4025135	4025384	peak_16022_Old	FBgn0035484	CG11594	0.775564	0.000798948	0.0456747
255	2L	15836793	15837154	peak_5247_Young	FBgn0028900	CG18518	0.67493	0.000804656	0.0458293
271	X	13954327	13954607	peak_36359_Young	FBgn0030536	CG11068	0.422945	0.000818625	0.0462796
288	X	2137522	2137789	peak_32837_Young	FBgn0004861	ph-p	0.309733	0.000816035	0.0462796
272	2L	18838992	18839253	peak_6094_Young	FBgn0032717	CG10600	-0.441137	0.000847613	0.0477416
270	3R	6741611	6741871	peak_23515_Young	FBgn0051481	pb	-0.432781	0.000853638	0.0479041
281	X	19069579	19069841	peak_37934_Young	FBgn0085359	CG34330	-0.401415	0.000864194	0.0482577
287	2R	23712713	23712983	peak_13888_Young	FBgn0034897	Sesn	-0.34501	0.000866261	0.0482577
265	3R	31754217	31754622	peak_31432_Old	FBgn0039872	salt	0.50303	0.000870244	0.0483033
263	3L	5153473	5153722	peak_16380_Old	FBgn0010747	Srp54k	0.797675	0.000878172	0.0485667
261	2R	9094593	9094842	peak_8936_Young	FBgn0033373	CG8080	-0.754152	0.000888074	0.048937
280	3L	603216	603477	peak_14798_Young	FBgn0035146	CG13893	0.523763	0.000924211	0.0507451
278	X	8459308	8459589	peak_34730_Young	FBgn0023506	Es2	-0.509642	0.000930136	0.0508874
282	2R	17100856	17101143	peak_11549_VeryOld	FBgn0050456	CG30456	0.439181	0.00093863	0.0511687
279	3R	22368580	22368850	peak_28256_Young	FBgn0038951	CG5380	-0.425571	0.000954798	0.051681
283	2R	8798119	8798381	peak_8822_Young	FBgn0024189	sns	-0.434581	0.000953768	0.051681
275	2R	23126389	23126944	peak_13645_Old	FBgn0034824	Klp59C	0.541845	0.000959462	0.0517499
269	2L	6006583	6006868	peak_2182_Old	FBgn0001089	Gal	0.595162	0.000974747	0.0523892
273	2R	14434297	14434556	peak_10680_Young	FBgn0261613	Oaz	-0.523409	0.000982007	0.0525942
298	2R	8068944	8069236	peak_8524_Young	FBgn0020279	lig	-0.384906	0.00100882	0.0538414
297	X	19961249	19961702	peak_38289_Young	FBgn0031081	Nep3	-0.390467	0.00104038	0.0553323
304	2L	5403607	5403874	peak_1992_Young	FBgn0016660	H15	-0.398276	0.00104566	0.0554199
313	X	2123396	2123665	peak_32831_Young	FBgn0004860	ph-d	0.289975	0.00105151	0.0555369
292	X	16005207	16005467	peak_36974_Young	FBgn0030721	CG12698	-0.384586	0.00107212	0.0564307
285	X	7285434	7285693	peak_34392_Young	FBgn0029942	CG2059	-0.456588	0.0010818	0.0567446
306	2R	12679566	12679832	peak_10119_Young	FBgn0261625	CG42708	-0.39559	0.00112268	0.0586351
312	3L	199176	199427	peak_14614_Young	FBgn0035107	mri	0.333886	0.00112553	0.0586351
284	2L	306241	306503	peak_244_Young	FBgn0004611	Plc21C	-0.572892	0.00113172	0.0587569
290	2R	14212850	14213116	peak_10603_Young	FBgn0005613	Sox15	-0.488883	0.00113979	0.0589752
307	2R	17568627	17569140	peak_11718_Young	FBgn0034243	Ns2	0.360608	0.00115346	0.0594809
296	X	8651383	8651643	peak_34800_Young	FBgn0004102	oc	-0.410553	0.00116397	0.0598211
299	X	8690140	8690396	peak_34811_Young	FBgn0027864	Ogg1	0.402568	0.0011684	0.0598471
289	3R	4386577	4386846	peak_22566_Mid	FBgn0003882	tub	0.530863	0.0011733	0.059897
286	3L	9760333	9760582	peak_17803_Young	FBgn0259163	CG42268	-0.678483	0.00119448	0.0607754
295	X	22831997	22832279	peak_38999_Young	FBgn0259677	CG42346	-0.459286	0.00121592	0.0614562
302	X	16701682	16702205	peak_37175_VeryOld	FBgn0030776	CG4653	0.42919	0.00121506	0.0614562
309	2L	16716029	16716289	peak_5492_Young	FBgn0086907	Cyt-c-d	-0.393866	0.00123144	0.0620354
293	3L	4532016	4532301	peak_16190_Young	FBgn0035557	CG11353	-0.513383	0.0012588	0.0632051
291	X	6986809	6987058	peak_34330_Old	FBgn0261284	bou	0.577028	0.00128334	0.0642259
330	3R	21080945	21081619	peak_27838_Young	FBgn0038852	HHEX	-0.314682	0.0012883	0.0642634
303	X	2366486	2366748	peak_32950_VeryOld	FBgn0003159	ptr	0.466256	0.00129912	0.0645922
308	2L	10850262	10850522	peak_3798_Young	FBgn0262599	CG43129	-0.434971	0.0013107	0.0649562
294	2L	4793966	4794442	peak_1779_Mid	FBgn0031628	CG3294	-0.556383	0.0013332	0.0652242
300	3L	16359339	16359610	peak_19774_Young	FBgn0266417	CG45057	-0.543677	0.00132239	0.0652242
301	2L	18503938	18504233	peak_5966_Young	FBgn0032683	kon	-0.504296	0.00133177	0.0652242
318	2L	106387	106886	peak_150_Young	FBgn0005278	Sam-S	0.368786	0.00133195	0.0652242
320	3L	22135897	22136155	peak_21796_Young	FBgn0037153	olf413	-0.386065	0.00134586	0.0656333
311	2L	16881012	16881285	peak_5561_Young	FBgn0052832	CG32832	-0.555043	0.00136955	0.066576
333	X	17768205	17768459	peak_37515_Young	FBgn0024184	unc-4	-0.355631	0.00137489	0.0666231
319	2R	22925790	22926174	peak_13585_Young	FBgn0261564	CG42678	-0.375739	0.00139215	0.0672459
328	3R	26537045	26537299	peak_29576_Young	FBgn0263289	scrib	-0.369068	0.00139702	0.0672685
322	2R	13296259	13296512	peak_10302_Young	FBgn0052843	Dh31-R	-0.40004	0.00144025	0.0691321
326	3R	24270167	24270425	peak_28885_Young	FBgn0011225	jar	-0.420647	0.00145814	0.0697711
342	X	2222136	2222393	peak_32882_Young	FBgn0029606	CG14052	0.320282	0.00147319	0.0702711
305	3L	22687923	22688172	peak_22070_Old	FBgn0037176	CG14456	0.61695	0.00149806	0.0712347
310	2R	10418012	10418280	peak_9425_Young	FBgn0033518	Prx2540-2	-0.811864	0.00153039	0.0725461
317	3L	14613358	14613726	peak_19198_Young	FBgn0003388	shd	-0.506999	0.00153813	0.0726873
315	X	16683485	16683745	peak_37164_Young	FBgn0000152	Axs	-0.543312	0.00154563	0.0728162
341	3L	12391316	12391826	peak_18578_Young	FBgn0036279	Ncc69	-0.317821	0.00156559	0.0735295
353	2R	13964496	13964789	peak_10510_Young	FBgn0261975	CG42806	-0.394963	0.00157583	0.0737838
314	3L	8185538	8185787	peak_17282_Young	FBgn0035849	ERR	-0.590528	0.00159173	0.0740736
335	3R	18399092	18399360	peak_26995_Young	FBgn0028670	Vha100-2	-0.412986	0.00158823	0.0740736
345	3R	12594620	12594877	peak_25265_Young	FBgn0038063	Octbeta2R	-0.356233	0.00161213	0.0747949
346	3R	18398456	18398720	peak_26994_Young	FBgn0028670	Vha100-2	-0.416811	0.00163787	0.075759
316	4	1126443	1126694	peak_31914_VeryOld	FBgn0039927	CG11155	0.678787	0.0016575	0.0763636
325	X	4322948	4323202	peak_33609_Young	FBgn0262738	norpA	-0.564903	0.0016658	0.0763636
349	2L	5944423	5944981	peak_2148_Young	FBgn0001128	Gpdh	-0.328464	0.00167095	0.0763636
351	2R	11650955	11651211	peak_9821_Young	FBgn0085257	CG34228	-0.355001	0.00167081	0.0763636
324	X	15746127	15746392	peak_36878_Young	FBgn0027329	Tcp-1zeta	-0.5218	0.00167693	0.0764082
332	3R	16356410	16356706	peak_26467_Young	FBgn0038420	CG10311	-0.454091	0.00172736	0.0782387
363	3L	19929960	19930238	peak_20932_Young	FBgn0036920	CG8004	-0.368537	0.00172228	0.0782387
365	3L	3374093	3374345	peak_15810_Young	FBgn0035443	CG12010	0.339673	0.00175582	0.0790652
368	3L	7934274	7934544	peak_17183_Young	FBgn0035827	Srp9	-0.403469	0.00175597	0.0790652
321	3R	29318562	29318811	peak_30553_Young	FBgn0015622	Cnx99A	-0.728281	0.00177363	0.0791014
323	2R	21200298	21200549	peak_12913_Young	FBgn0265180	CG44245	-0.703949	0.0017775	0.0791014
338	2R	23953925	23954178	peak_13979_Young	FBgn0034939	thoc5	0.409949	0.00177719	0.0791014
356	X	3135665	3135932	peak_33239_Young	FBgn0004647	N	-0.397255	0.00177411	0.0791014
350	2L	129582	129841	peak_164_Young	FBgn0025683	CG3164	0.488523	0.00178464	0.0791883
340	2R	7586959	7587223	peak_8327_Young	FBgn0004133	blow	0.439165	0.00182609	0.0807927
327	3R	14224041	14224290	peak_25712_Old	FBgn0053329	Sp212	0.793054	0.00184783	0.0815183
357	X	6756424	6756687	peak_34253_Young	FBgn0029899	CG14438	0.39909	0.00187647	0.082543
372	3L	7809474	7809731	peak_17139_Young	FBgn0052369	CG32369	0.342918	0.00188757	0.0827927
329	2R	8005569	8005964	peak_8501_Old	FBgn0013307	Odc1	0.589075	0.00189426	0.0828482
385	3L	5976009	5976317	peak_16576_Young	FBgn0035656	CG10479	-0.390727	0.00190333	0.0830068
334	2R	8121282	8121541	peak_8542_Young	FBgn0033264	Nup50	-0.614818	0.00193903	0.0840832
359	2R	21282409	21282952	peak_12936_Young	FBgn0034611	MFS16	-0.417314	0.00193542	0.0840832
331	X	12031316	12031565	peak_35864_Young	FBgn0030369	Cyp318a1	-0.707981	0.00196933	0.0851029
367	X	17820351	17820620	peak_37523_Young	FBgn0030868	CG12986	-0.389003	0.00197369	0.0851029
390	2R	24969174	24969935	peak_14432_Young	FBgn0002607	RpL19	0.321147	0.00199009	0.0855682
339	X	18929814	18930073	peak_37894_Old	FBgn0264090	CG43759	0.566121	0.00202007	0.0865861
382	X	10877456	10877913	peak_35508_Young	FBgn0030245	CG1637	-0.349794	0.00202511	0.0865861
337	2L	11066935	11067208	peak_3859_Young	FBgn0032330	Samuel	-0.540784	0.00203201	0.0866384
336	2R	18835141	18835403	peak_12109_Young	FBgn0034399	CG15083	-0.576204	0.00207614	0.0874454
355	2R	23382798	23383071	peak_13756_Young	FBgn0040660	CG13551	-0.459843	0.00206216	0.0874454
361	3L	15141743	15141996	peak_19364_Mid	FBgn0014002	Pdi	0.462509	0.00207958	0.0874454
373	2R	23231536	23231818	peak_13693_Young	FBgn0034835	CG3092	-0.379805	0.00206997	0.0874454
402	3L	246267	246773	peak_14640_Young	FBgn0052476	mthl14	0.360235	0.00207912	0.0874454
378	X	278036	278298	peak_32000_Young	FBgn0024989	CG3777	-0.381427	0.00212204	0.0889856
406	2R	7044953	7045215	peak_8092_Young	FBgn0033134	Tsp42El	0.333024	0.00213466	0.0892696
362	3R	6742067	6742326	peak_23516_Young	FBgn0051481	pb	-0.436756	0.00214563	0.0894835
343	2R	11435285	11435534	peak_9752_Young	FBgn0033635	CG7777	-0.846158	0.00215318	0.0895536
386	3R	12817460	12817725	peak_25327_Young	FBgn0051345	CG31345	-0.424547	0.00218122	0.0904732
366	2L	11792885	11793447	peak_4026_Old	FBgn0032376	Tsp33B	0.490933	0.00219683	0.0908739
344	3L	16725686	16725935	peak_19900_Old	FBgn0036655	CG13031	0.733581	0.00222289	0.0917034
425	X	635741	636457	peak_32127_Young	FBgn0003575	su(s)	0.300079	0.00223399	0.0919127
352	2L	1441061	1441353	peak_714_Mid	FBgn0263321	CG43402	-0.634585	0.00224713	0.0919578
399	3R	18199989	18200255	peak_26930_Young	FBgn0011481	Ssdp	0.37366	0.00224663	0.0919578
347	X	18410082	18410331	peak_37703_Young	FBgn0052549	CG32549	-0.640708	0.00227424	0.0924289
348	2R	25140340	25140589	peak_14504_Old	FBgn0262566	CG43106	0.684795	0.00227681	0.0924289
396	2L	155998	156252	peak_176_Young	FBgn0031229	CG3436	0.370494	0.00226619	0.0924289
354	3L	14729002	14729251	peak_19230_Old	FBgn0036442	CG13473	0.714125	0.00234509	0.0927848
371	3L	20778953	20779318	peak_21235_Young	FBgn0037020	Pex14	-0.465041	0.00234846	0.0927848
379	2R	6812239	6812507	peak_7997_Young	FBgn0022224	ubl	-0.433363	0.00232169	0.0927848
380	X	13404234	13404501	peak_36200_Young	FBgn0030484	GstT4	-0.44206	0.00230652	0.0927848
384	X	20257041	20257292	peak_38379_Young	FBgn0260867	CG42577	-0.421052	0.00231697	0.0927848
391	3L	20491592	20491849	peak_21142_Young	FBgn0037001	CG6020	0.394259	0.00232301	0.0927848
395	2L	21053257	21053521	peak_6847_Mid	FBgn0010395	Itgbetanu	0.382739	0.00235244	0.0927848
418	2R	10618362	10618639	peak_9510_Young	FBgn0033538	CG11883	-0.34987	0.00232284	0.0927848
419	X	19960400	19960659	peak_38288_Young	FBgn0031081	Nep3	-0.403078	0.00233266	0.0927848
420	2R	10427953	10428211	peak_9432_Young	FBgn0262114	RanBPM	-0.323431	0.00233269	0.0927848
423	2L	12719787	12720041	peak_4274_Young	FBgn0032456	MRP	-0.351797	0.00234023	0.0927848
375	2L	10009917	10010183	peak_3550_Young	FBgn0011584	Trp1	-0.502504	0.0023618	0.0929136
358	2L	17526397	17526646	peak_5720_Old	FBgn0032647	CG15143	0.738666	0.0024041	0.0930828
360	3R	13258723	13259051	peak_25439_Young	FBgn0040551	CG11686	-0.667118	0.00241935	0.0930828
364	X	17453265	17453514	peak_37397_Young	FBgn0030841	CG8568	-0.798753	0.00237782	0.0930828
389	3L	55256	55521	peak_14545_Young	FBgn0262679	CG43149	0.518071	0.00241708	0.0930828
404	3L	699127	699381	peak_14840_Young	FBgn0035157	CG13894	-0.377394	0.00241602	0.0930828
414	3L	8835051	8835307	peak_17523_Young	FBgn0052026	CG32026	-0.466807	0.00242098	0.0930828
421	3R	21618395	21618655	peak_28023_Young	FBgn0013984	InR	-0.32673	0.0023878	0.0930828
424	X	523525	523781	peak_32087_Young	FBgn0260400	elav	0.317072	0.00241532	0.0930828
435	3L	11966255	11966517	peak_18456_Young	FBgn0028573	prc	-0.357187	0.00238376	0.0930828
403	2L	3770898	3771351	peak_1478_Young	FBgn0004893	bowl	-0.387604	0.0024621	0.0941891
407	3L	11966694	11966957	peak_18457_Young	FBgn0028573	prc	-0.410011	0.00245646	0.0941891
412	X	5965677	5965937	peak_34009_Young	FBgn0029830	Grip	-0.385007	0.00247697	0.0945211
443	3R	30277002	30277275	peak_30875_Young	FBgn0010113	hdc	0.326392	0.00250185	0.0952325
408	2L	16888829	16889086	peak_5569_Young	FBgn0260758	CG42556	-0.439366	0.00251301	0.0954195
374	X	13669306	13669794	peak_36253_VeryOld	FBgn0030508	CG15760	0.555255	0.00252975	0.0958166
369	2L	20091490	20091739	peak_6531_Young	FBgn0032846	CG10721	-0.557686	0.00253856	0.0959124
415	X	17789474	17789733	peak_37518_Young	FBgn0026058	OdsH	-0.408767	0.00255079	0.0961365
370	2R	23099502	23099751	peak_13639_Old	FBgn0034822	RpL37b	0.827336	0.00255783	0.0961643
377	2R	21612616	21612865	peak_13061_Old	FBgn0034639	CG15673	0.578748	0.00256512	0.0962016
397	3L	19635138	19635400	peak_20829_VeryOld	FBgn0036896	wnd	0.449978	0.00257524	0.0963443
381	3L	18087079	18087412	peak_20354_VeryOld	FBgn0085282	CG34253	0.493291	0.00259366	0.0967962
413	3R	10434871	10435130	peak_24659_Young	FBgn0037817	Cyp12e1	-0.413796	0.00261017	0.0969384
449	2L	158865	159120	peak_177_Young	FBgn0016977	spen	0.310311	0.00260414	0.0969384
387	X	295450	295915	peak_32008_Old	FBgn0040370	CG13375	0.505879	0.0026269	0.097022
393	3L	1969022	1969288	peak_15293_Young	FBgn0027547	CG1927	-0.494767	0.0026379	0.097022
394	3L	1189407	1189656	peak_15006_Old	FBgn0035186	CG13912	-0.457095	0.00264566	0.097022
411	3L	17622948	17623211	peak_20203_Old	FBgn0036740	Vps60	0.376236	0.00263187	0.097022
445	3L	9615403	9615842	peak_17746_Young	FBgn0267348	LanB2	-0.317259	0.00263272	0.097022
447	X	636544	636798	peak_32128_Young	FBgn0003575	su(s)	0.356563	0.00265056	0.097022
440	2R	9414654	9414915	peak_9074_Young	FBgn0041087	wun2	0.370863	0.00266816	0.0974325
432	2R	17544355	17544789	peak_11701_Young	FBgn0028382	cyp33	-0.435328	0.00270595	0.0985768
376	3L	1647089	1647338	peak_15192_Old	FBgn0013755	Bro	0.669945	0.00272844	0.0991592
417	3R	24581966	24582256	peak_28971_Old	FBgn0039209	CG13624	0.428447	0.00274752	0.0993795
439	3L	692800	693054	peak_14837_Young	FBgn0260862	Vti1	0.372642	0.00274198	0.0993795
442	2L	3108056	3108592	peak_1255_Young	FBgn0005779	PpD6	-0.341259	0.00279293	0.100783
436	3L	264256	264509	peak_14651_Young	FBgn0035122	mRpL17	0.396957	0.00283067	0.101664
471	3R	29063182	29063435	peak_30436_Young	FBgn0039633	CG11873	0.30818	0.00282769	0.101664
383	X	953563	953812	peak_32273_Old	FBgn0040350	CG3690	0.722614	0.00284472	0.101929
401	3R	5565440	5565701	peak_23063_Young	FBgn0037341	CG12746	-0.503484	0.00285325	0.101993
441	X	2468820	2469075	peak_33001_Young	FBgn0040388	boi	-0.432006	0.00285986	0.101993
388	3R	27438430	27438680	peak_29884_Young	FBgn0263401	CG43447	-0.676954	0.00287549	0.102281
438	2L	16889113	16889373	peak_5570_Young	FBgn0260758	CG42556	-0.44479	0.00288133	0.102281
410	3L	17855680	17855957	peak_20270_Mid	FBgn0036764	CG5535	0.476678	0.0028931	0.10246
427	2R	14170923	14171173	peak_10580_Young	FBgn0033906	CG8331	-0.47983	0.00290311	0.102577
392	2L	11136835	11137084	peak_3876_Old	FBgn0040211	hgo	0.68355	0.00293524	0.10304
429	3R	27282437	27282738	peak_29826_Young	FBgn0039507	mrt	-0.41769	0.00294324	0.10304
451	3L	146269	146530	peak_14585_Young	FBgn0035099	CG6845	0.364871	0.002942	0.10304
454	2R	10423216	10423473	peak_9429_Young	FBgn0033520	Prx2540-1	-0.380662	0.00293525	0.10304
450	X	16104873	16105129	peak_36996_Young	FBgn0259699	CG42353	-0.362483	0.00295408	0.103183
458	X	7912027	7912304	peak_34558_Young	FBgn0029976	snz	-0.343352	0.00297865	0.103804
409	2R	10356950	10357226	peak_9413_VeryOld	FBgn0033512	CG12902	0.551201	0.00300797	0.104587
398	3R	28872500	28872749	peak_30346_Old	FBgn0039609	CG14529	0.687395	0.00302555	0.104959
426	2R	6839731	6840071	peak_8006_Young	FBgn0040674	CG9445	0.474899	0.00305702	0.105571
502	2R	22549854	22550107	peak_13429_Young	FBgn0034736	CG6018	0.301539	0.00305667	0.105571
400	3L	20777128	20777377	peak_21232_Old	FBgn0037020	Pex14	0.695743	0.00306907	0.105748
484	X	6998547	6998828	peak_34334_Young	FBgn0027108	Inx2	-0.331739	0.00309063	0.106251
481	3L	13044591	13044845	peak_18771_Young	FBgn0036341	Syx13	-0.305906	0.00312765	0.107282
405	2R	11234522	11234771	peak_9681_Old	FBgn0033588	CG13228	0.741761	0.00315085	0.107354
444	3R	18280131	18280413	peak_26956_Young	FBgn0038595	CG7142	-0.404633	0.00314272	0.107354
485	2L	8212283	8213248	peak_2955_Young	FBgn0015299	Ssb-c31a	0.288205	0.00314857	0.107354
467	X	8464305	8464828	peak_34733_Young	FBgn0014032	Sptr	-0.384652	0.00318062	0.108093
477	3R	16830093	16830346	peak_26574_Young	FBgn0000014	abd-A	-0.333438	0.00319378	0.108093
494	X	9029964	9030229	peak_34873_Young	FBgn0259734	CG42388	-0.32672	0.00319027	0.108093
468	3L	9373541	9373794	peak_17658_Young	FBgn0001228	Hsp67Bb	-0.388129	0.00324392	0.109547
499	2L	5461330	5461589	peak_1999_Young	FBgn0261963	mid	-0.329659	0.00325975	0.109839
433	3R	15536461	15536716	peak_26145_Young	FBgn0267408	AOX1	-0.462782	0.00327841	0.110224
456	X	12074532	12074975	peak_35874_Mid	FBgn0030373	CG12721	0.443403	0.00331404	0.111177
470	2L	12655781	12656041	peak_4251_Young	FBgn0004394	pdm2	-0.402027	0.00332391	0.111264
430	X	11493345	11493595	peak_35671_VeryOld	FBgn0052666	Drak	0.478402	0.00334594	0.111756
486	3L	9462040	9462301	peak_17701_Young	FBgn0266101	CG44838	-0.348096	0.00336305	0.112082
416	3L	13938506	13938766	peak_19003_Young	FBgn0052137	CG32137	-0.690292	0.00338236	0.112236
469	3L	11777523	11777785	peak_18391_Young	FBgn0036205	CG14131	-0.402544	0.00338005	0.112236
448	3R	29255234	29255507	peak_30524_Young	FBgn0267104	CG45544	-0.453071	0.00340494	0.11274
457	2R	15424382	15424660	peak_10985_Young	FBgn0050472	CG30472	-0.447056	0.00342043	0.112796
496	3L	18800275	18800548	peak_20534_Young	FBgn0001078	ftz-f1	-0.322136	0.00342141	0.112796
422	3L	18861795	18862044	peak_20566_Old	FBgn0036817	CG6865	0.654511	0.00350173	0.113242
446	3L	3127363	3127618	peak_15712_Old	FBgn0026189	prominin-like	0.459876	0.00347345	0.113242
453	X	19662926	19663195	peak_38180_Young	FBgn0031054	Ssu72	-0.566833	0.00349323	0.113242
465	X	9078361	9078628	peak_34894_Young	FBgn0265413	CG44325	-0.39867	0.00349749	0.113242
475	3R	16051311	16051605	peak_26321_Young	FBgn0027948	msps	-0.365268	0.00346329	0.113242
480	3L	6979413	6979682	peak_16891_Young	FBgn0001104	Galphai	-0.36929	0.00347839	0.113242
504	X	18864564	18864821	peak_37868_Young	FBgn0085430	CG34401	-0.350166	0.00348841	0.113242
505	2L	20714555	20714808	peak_6684_Young	FBgn0014859	Hr38	-0.303846	0.00346453	0.113242
506	X	7109791	7110057	peak_34360_Young	FBgn0027342	fz4	-0.327247	0.00346344	0.113242
483	3L	8110230	8110731	peak_17253_Young	FBgn0027549	CG7927	0.360378	0.00355927	0.11486
428	3R	30629120	30629369	peak_31013_Old	FBgn0039792	CG2267	0.68801	0.00358819	0.11534
495	3R	19889956	19890212	peak_27472_Young	FBgn0038744	CG4733	-0.421993	0.00358925	0.11534
431	3L	21335797	21336046	peak_21453_Old	FBgn0037073	CG7338	0.61139	0.00361864	0.115796
452	3R	24825172	24825603	peak_29050_Old	FBgn0045980	niki	0.571167	0.00361313	0.115796
511	2L	18185580	18185835	peak_5876_Young	FBgn0267486	Ptp36E	0.346389	0.00365534	0.116726
507	X	3372992	3373251	peak_33304_Young	FBgn0262656	dm	0.345601	0.00366429	0.116768
434	2R	21175080	21175329	peak_12900_Young	FBgn0003162	Pu	-0.698606	0.00369488	0.117497
437	3R	29137298	29137564	peak_30470_Old	FBgn0039640	CG14516	0.598911	0.00371815	0.117992
476	3L	18074920	18075179	peak_20348_Young	FBgn0264746	CG44004	-0.388895	0.00375849	0.119024
466	2L	3656153	3656518	peak_1433_Young	FBgn0000721	for	-0.44956	0.00377733	0.119373
519	X	8271460	8271735	peak_34685_Young	FBgn0030030	CG1636	-0.422518	0.00387645	0.122252
455	3L	12275505	12275754	peak_18559_Young	FBgn0036273	CG10426	-0.564672	0.00393225	0.122996
461	3R	18227429	18227715	peak_26938_Young	FBgn0038586	CG7168	-0.534958	0.00392715	0.122996
464	3L	2502880	2503205	peak_15498_Old	FBgn0035348	CG16758	0.523544	0.00392249	0.122996
515	3R	26104667	26104936	peak_29448_Young	FBgn0051324	CG31324	-0.35649	0.00391158	0.122996
463	3R	26988431	26988680	peak_29742_Young	FBgn0051075	CG31075	-0.585344	0.00395232	0.12337
482	2L	17127528	17127794	peak_5610_Young	FBgn0051784	CG31784	0.405802	0.00396983	0.123664
514	2R	9139555	9139902	peak_8965_Young	FBgn0260972	alc	-0.352988	0.00397985	0.123724
459	2L	22175081	22175358	peak_7152_Mid	FBgn0032981	CG3635	0.591391	0.00398814	0.12373
553	3R	26020130	26020383	peak_29424_Young	FBgn0002609	E(spl)m3-HLH	0.304458	0.00399742	0.123766
538	X	11807394	11807667	peak_35780_Young	FBgn0001218	Hsc70-3	-0.361771	0.00405405	0.125265
552	3R	15973647	15973955	peak_26292_Young	FBgn0022787	Hel89B	-0.273917	0.0040664	0.125393
536	3R	31372788	31373889	peak_31275_Young	FBgn0046332	gskt	0.337545	0.00407745	0.12548
460	X	142456	142705	peak_31969_VeryOld	FBgn0029128	tyn	0.629104	0.00412381	0.126144
462	X	18084817	18085066	peak_37593_Young	FBgn0030891	dik	-0.569629	0.0041228	0.126144
539	X	1861949	1862203	peak_32718_Young	FBgn0028969	deltaCOP	0.322201	0.00412178	0.126144
472	2R	23700839	23701100	peak_13884_Young	FBgn0013548	l(2)dtl	-0.564621	0.00415315	0.126534
508	3R	29257027	29257292	peak_30527_Young	FBgn0267104	CG45544	-0.447728	0.00415059	0.126534
516	3L	6263886	6264394	peak_16670_Young	FBgn0001258	ImpL3	-0.436584	0.0041646	0.12663
541	3R	9013699	9014137	peak_24179_Young	FBgn0037655	CG11984	-0.358075	0.00418826	0.127097
478	2R	16669622	16669927	peak_11418_VeryOld	FBgn0085486	CG34457	0.496886	0.00421042	0.127516
548	2L	15432849	15433098	peak_5144_Young	FBgn0028892	CG4161	0.344313	0.004223	0.127643
479	2L	13957936	13958406	peak_4640_Old	FBgn0261514	NimA	0.513529	0.00429519	0.129488
574	3L	15825442	15825860	peak_19579_Young	FBgn0040230	dbo	-0.302615	0.00430099	0.129488
524	2L	12707515	12708289	peak_4270_Young	FBgn0032453	CG6180	-0.363525	0.00431354	0.129493
534	2R	13197545	13198209	peak_10276_Young	FBgn0027079	Aats-val	-0.356026	0.00431814	0.129493
500	3L	7893793	7894373	peak_17171_Old	FBgn0035823	eIF4E-5	0.413923	0.00434364	0.130003
490	X	5918637	5918900	peak_33995_Young	FBgn0029823	CG3011	-0.505694	0.00436601	0.130416
474	2L	13264911	13265160	peak_4418_Old	FBgn0051848	CG31848	0.570903	0.00438637	0.130608
493	X	4937081	4937340	peak_33771_Young	FBgn0004368	Ptp4E	-0.489827	0.00438953	0.130608
520	2L	13779657	13779912	peak_4575_Old	FBgn0024846	p38b	0.408566	0.00442717	0.131472
565	X	19167281	19167539	peak_37971_Young	FBgn0261461	RhoGAP18B	-0.336249	0.00444577	0.131767
602	2L	2955711	2956214	peak_1195_Young	FBgn0010263	Rbp9	0.3146	0.00445662	0.131833
473	3R	31195820	31196069	peak_31195_Young	FBgn0039827	CG1544	-0.734876	0.00447487	0.131862
491	2L	2078912	2079471	peak_930_Old	FBgn0031388	CG12674	0.569594	0.00446905	0.131862
512	3L	19834549	19834991	peak_20882_Young	FBgn0003744	trc	0.440951	0.00452366	0.132787
529	2R	7419108	7419378	peak_8251_Young	FBgn0003460	so	-0.381964	0.00452036	0.132787
543	2L	18186587	18186841	peak_5877_Young	FBgn0267486	Ptp36E	0.396781	0.00455489	0.133447
575	2R	7011229	7011919	peak_8078_Young	FBgn0029506	Tsp42Ee	-0.354767	0.00460356	0.134357
599	3R	13182280	13182775	peak_25425_Young	FBgn0038122	CG8138	0.455991	0.00460096	0.134357
488	2L	16714503	16714856	peak_5491_Young	FBgn0086907	Cyt-c-d	-0.56666	0.00461247	0.13436
582	2R	10424159	10424421	peak_9431_Young	FBgn0033520	Prx2540-1	-0.303465	0.00465225	0.135261
501	2L	3145593	3145849	peak_1267_Young	FBgn0015600	toc	-0.435473	0.00467484	0.135586
561	2L	20638498	20638754	peak_6656_Young	FBgn0051680	CG31680	-0.302181	0.00468121	0.135586
498	3R	9510827	9511084	peak_24336_Young	FBgn0267790	rump	-0.511642	0.0047153	0.136315
523	3R	20659601	20659865	peak_27701_Young	FBgn0038818	Nep4	0.430126	0.00473458	0.136614
550	2L	11280176	11280702	peak_3916_Young	FBgn0020270	mre11	-0.347621	0.0047483	0.136751
487	3R	27005955	27006204	peak_29751_Old	FBgn0039470	CG6296	0.621105	0.00481218	0.137962
528	2L	114506	114764	peak_156_Young	FBgn0031228	CG11455	0.422547	0.00480986	0.137962
542	2R	5495773	5496032	peak_7526_Young	FBgn0050438	CG30438	0.386545	0.00481748	0.137962
583	X	18276766	18277028	peak_37654_Young	FBgn0053542	upd3	-0.38071	0.00484189	0.138402
489	3R	16569445	16569694	peak_26528_Old	FBgn0038445	CG14891	0.683819	0.00490064	0.138782
492	X	8245017	8245266	peak_34680_Young	FBgn0030026	sni	-0.658182	0.00488503	0.138782
518	3L	21808536	21808815	peak_21658_Young	FBgn0000560	eg	-0.450491	0.00488998	0.138782
556	2R	11527870	11528184	peak_9774_Young	FBgn0000577	en	-0.358675	0.00487987	0.138782
558	2R	17598103	17598558	peak_11733_Young	FBgn0264541	CG43920	-0.430441	0.00489329	0.138782
544	3L	11776845	11777119	peak_18389_Young	FBgn0036205	CG14131	-0.461584	0.00491261	0.138863
497	3R	27656973	27657255	peak_29952_Young	FBgn0266579	tau	-0.553431	0.00496408	0.140059
533	3L	7726097	7726607	peak_17117_Young	FBgn0035812	CG7457	-0.416191	0.00498052	0.140263
522	2L	21657762	21658020	peak_6992_Young	FBgn0032956	Cul2	0.459673	0.00500723	0.140756
513	2R	21117593	21117870	peak_12861_Young	FBgn0034588	CG9394	-0.565357	0.00505262	0.141771
525	3R	21406842	21407103	peak_27967_Young	FBgn0038888	CheB93a	-0.450042	0.00509307	0.142643
517	2R	10026419	10026668	peak_9282_Mid	FBgn0033473	CG12128	0.498615	0.00510811	0.142803
540	X	17452631	17452902	peak_37396_Young	FBgn0030841	CG8568	-0.461342	0.00515947	0.143975
559	2L	8482016	8482270	peak_3060_Young	FBgn0264340	CG43796	0.388432	0.00519353	0.144397
628	3L	224616	224875	peak_14631_Young	FBgn0053229	CG33229	0.31151	0.00518477	0.144397
557	X	18635331	18635586	peak_37773_Young	FBgn0030941	wgn	-0.374133	0.00521286	0.144671
585	2L	3477169	3477429	peak_1369_Young	FBgn0261560	Thor	0.336848	0.00525458	0.145564
503	2R	11977988	11978237	peak_9927_VeryOld	FBgn0050036	CG30036	0.657187	0.00527555	0.145617
578	2R	14799502	14799762	peak_10787_Young	FBgn0001319	kn	-0.354405	0.00527223	0.145617
545	3R	14904233	14904490	peak_25935_Young	FBgn0028662	VhaPPA1-1	-0.414869	0.00530155	0.145973
607	3R	30888354	30888610	peak_31099_Young	FBgn0000416	Sap-r	-0.298581	0.0053076	0.145973
509	2R	2968808	2969057	peak_7356_Old	FBgn0020908	Scp1	0.6478	0.00535725	0.146421
510	3R	31235334	31235583	peak_31218_Old	FBgn0039833	CG15564	0.691914	0.00537184	0.146421
566	2L	2992622	2993110	peak_1213_Young	FBgn0025681	CG3558	0.360223	0.00536893	0.146421
572	2R	22122764	22123017	peak_13254_Old	FBgn0002715	mei-S332	0.349287	0.0053613	0.146421
616	3R	7793716	7794169	peak_23790_Young	FBgn0037518	CG2641	-0.288154	0.00534157	0.146421
573	3L	18984713	18985436	peak_20606_VeryOld	FBgn0036835	CG14075	0.458814	0.00541037	0.147208
527	X	17284771	17285026	peak_37357_Young	FBgn0030837	CG8661	-0.506859	0.00546323	0.148119
610	2L	4332638	4332913	peak_1647_Young	FBgn0020762	Atet	-0.426332	0.00546081	0.148119
629	X	16149085	16149346	peak_37003_Young	FBgn0042650	disco-r	-0.32492	0.00548624	0.148479
521	X	4242015	4242279	peak_33577_Mid	FBgn0041252	Femcoat	0.625387	0.00552881	0.148624
547	2L	18822232	18822494	peak_6088_Young	FBgn0032713	CG17323	-0.460932	0.00553054	0.148624
604	2L	2372133	2372386	peak_1024_VeryOld	FBgn0031417	CG3597	0.412795	0.00551789	0.148624
640	2L	12586944	12587200	peak_4235_Young	FBgn0085424	nub	-0.3063	0.00550483	0.148624
555	3L	15303675	15303941	peak_19418_Young	FBgn0036492	Best3	-0.473075	0.0055619	0.149204
564	3R	20898737	20899375	peak_27777_Old	FBgn0038839	CG10830	0.4253	0.00557345	0.149251
584	X	530118	530376	peak_32089_Young	FBgn0000108	Appl	0.366504	0.0056012	0.149732
576	3L	1205299	1205559	peak_15017_Young	FBgn0004425	LysB	-0.409986	0.0056232	0.150057
526	2L	13435383	13435690	peak_4479_Old	FBgn0026760	Tehao	0.56337	0.00566003	0.150394
549	X	18357812	18358069	peak_37675_Young	FBgn0030914	CG6106	-0.421318	0.00570304	0.150394
554	3R	25611488	25611939	peak_29312_Mid	FBgn0039346	CG5079	0.445961	0.00568638	0.150394
592	3R	25287218	25287474	peak_29207_Young	FBgn0039315	CG13658	-0.427538	0.00570482	0.150394
594	X	8709172	8709439	peak_34815_Young	FBgn0041629	Hexo2	-0.381686	0.00567078	0.150394
619	2R	15689672	15689939	peak_11071_Young	FBgn0050088	CG30088	0.324908	0.00569178	0.150394
658	X	10602349	10602608	peak_35386_Young	FBgn0030218	CG1628	-0.300925	0.00565601	0.150394
546	X	7968661	7968914	peak_34588_Young	FBgn0003656	sws	-0.460008	0.00573289	0.150737
570	X	1368267	1368808	peak_32467_Young	FBgn0024987	ssx	0.405203	0.00574756	0.150737
588	3L	5753662	5753951	peak_16514_Young	FBgn0016756	Ubp64E	-0.398341	0.00573969	0.150737
597	X	2939686	2940500	peak_33171_Mid	FBgn0029643	CG14420	0.368726	0.0057573	0.150737
644	2R	24943577	24944056	peak_14418_Young	FBgn0035085	CG3770	0.291696	0.00581539	0.151997
535	X	12801943	12802232	peak_36038_Old	FBgn0030425	CG3775	0.624407	0.00585468	0.152762
591	2L	12055834	12056096	peak_4115_Young	FBgn0032404	RpL7-like	-0.411514	0.00587958	0.152946
624	2R	12925513	12925786	peak_10188_Young	FBgn0033782	sug	-0.337914	0.00588179	0.152946
659	3R	16025833	16026088	peak_26311_Young	FBgn0003117	pnr	-0.277354	0.0058918	0.152946
530	3L	6082993	6083242	peak_16613_Old	FBgn0035677	CG13293	0.684467	0.00592251	0.153482
531	3R	30427437	30427686	peak_30924_Old	FBgn0039768	CG15533	0.649743	0.00597175	0.154227
532	2L	18113429	18113678	peak_5842_Young	FBgn0032665	CG15152	-0.657336	0.00598777	0.154227
537	X	1210569	1210818	peak_32375_Mid	FBgn0040367	CG11382	0.657723	0.00596417	0.154227
590	3L	21569113	21569373	peak_21547_Young	FBgn0037102	CG7172	-0.391535	0.00599182	0.154227
633	X	3869089	3869354	peak_33461_Young	FBgn0028491	CG2930	-0.399291	0.00600177	0.154227
595	3R	18669989	18670244	peak_27071_Young	FBgn0038638	CG7702	-0.428415	0.00602817	0.154386
618	2R	14360148	14360414	peak_10660_Young	FBgn0033928	Arc2	0.344499	0.00602689	0.154386
675	3L	4071655	4071907	peak_16039_Young	FBgn0024179	wit	-0.322488	0.00607132	0.15523
608	2R	7447378	7447642	peak_8264_Young	FBgn0033174	CG11125	0.368426	0.00608861	0.155261
621	3R	14659276	14659534	peak_25851_Young	FBgn0038251	Hexim	0.351194	0.00609287	0.155261
606	2L	6367023	6367473	peak_2342_Old	FBgn0031805	CG9505	0.381646	0.00612719	0.155616
626	2L	5520111	5520370	peak_2009_Young	FBgn0000318	cl	-0.415532	0.00612258	0.155616
685	2L	1441979	1442251	peak_715_Young	FBgn0263321	CG43402	0.285242	0.00615154	0.155975
678	3L	20730313	20730574	peak_21207_Young	FBgn0037016	CG13252	-0.286471	0.00620248	0.157006
639	3L	176130	176402	peak_14605_Young	FBgn0035102	CG7049	0.332937	0.00623322	0.157323
660	X	5593932	5594192	peak_33889_Young	FBgn0263511	Vsx1	-0.343725	0.00623562	0.157323
560	3R	8288044	8288326	peak_23939_Mid	FBgn0037562	CG11671	0.518707	0.00637224	0.160505
567	3L	231953	232231	peak_14638_Old	FBgn0262035	CG42846	0.464487	0.00638678	0.160581
670	2L	21794672	21795168	peak_7035_Young	FBgn0051612	CG31612	-0.363764	0.00639629	0.160581
586	3L	12745190	12745452	peak_18679_Young	FBgn0052109	CG32109	0.433798	0.00648507	0.161234
589	2R	22401969	22402218	peak_13377_Young	FBgn0034724	babos	-0.438722	0.00645022	0.161234
601	2R	14881928	14882227	peak_10812_Young	FBgn0033980	Cyp6a20	-0.413069	0.00648202	0.161234
603	3R	10434541	10434820	peak_24658_Young	FBgn0037817	Cyp12e1	-0.441292	0.00647217	0.161234
630	2R	12979845	12980133	peak_10209_Young	FBgn0005624	Psc	-0.360354	0.00646974	0.161234
653	3L	8518777	8519055	peak_17396_Young	FBgn0035904	GstO3	0.304055	0.00649626	0.161234
681	3L	12515770	12516037	peak_18618_Young	FBgn0041775	tral	-0.280765	0.00648677	0.161234
716	2L	8825268	8825523	peak_3180_Young	FBgn0029123	SoxN	-0.271264	0.0065875	0.163233
551	2R	9979646	9979895	peak_9269_Old	FBgn0000606	eve	0.671235	0.00662073	0.163525
600	3R	6221117	6221598	peak_23333_Old	FBgn0037412	Osi4	0.453052	0.00661934	0.163525
679	2R	24687333	24687599	peak_14309_Young	FBgn0035049	Mmp1	0.329952	0.0066419	0.163784
637	2L	15964116	15964384	peak_5293_Young	FBgn0028645	beat-Ib	0.391487	0.00671819	0.165309
662	2R	25127999	25128282	peak_14499_Young	FBgn0050430	CG30430	0.365675	0.00672542	0.165309
562	3L	19292854	19293103	peak_20719_Young	FBgn0028380	fal	-0.622978	0.00681	0.165841
613	X	7947000	7947253	peak_34577_Young	FBgn0027280	l(1)G0193	-0.417399	0.00678471	0.165841
665	3R	19225679	19225932	peak_27254_Young	FBgn0262468	vib	-0.321018	0.00683874	0.165841
671	2L	19054252	19054511	peak_6171_Young	FBgn0032748	CG10492	-0.317379	0.00679672	0.165841
686	2R	9426349	9426611	peak_9077_Young	FBgn0017558	Pdk	0.31016	0.00683003	0.165841
692	X	22488001	22488269	peak_38889_Young	FBgn0027279	l(1)G0196	-0.302599	0.00682761	0.165841
694	3R	23225920	23226414	peak_28524_Young	FBgn0262975	cnc	-0.281925	0.00684483	0.165841
709	X	17826990	17827266	peak_37525_Young	FBgn0030869	Socs16D	-0.299775	0.00682552	0.165841
735	3R	30388603	30388854	peak_30915_Young	FBgn0015221	Fer2LCH	0.255754	0.00683339	0.165841
579	X	6849912	6850209	peak_34295_VeryOld	FBgn0029914	CG4558	0.521385	0.0069203	0.167357
612	2R	13081467	13081771	peak_10244_Young	FBgn0033791	Drl-2	0.451798	0.00694031	0.167357
636	X	9067877	9068134	peak_34885_Young	FBgn0030077	CG15365	-0.393418	0.00693196	0.167357
580	2R	21178900	21179157	peak_12902_Young	FBgn0034601	CG4286	-0.561469	0.00696863	0.167506
593	2R	11233899	11234355	peak_9680_Young	FBgn0033588	CG13228	0.504064	0.00697941	0.167506
627	2R	9130422	9130739	peak_8953_Young	FBgn0033382	Hydr1	-0.446826	0.00696194	0.167506
733	X	19353092	19353366	peak_38057_Young	FBgn0031016	kek5	0.261516	0.00701241	0.168034
563	2L	12699260	12699509	peak_4266_Old	FBgn0032448	CG5781	0.660231	0.00704015	0.168349
568	3R	18382115	18382364	peak_26984_Old	FBgn0038610	CG7675	0.581976	0.00709043	0.168349
569	3L	9597900	9598149	peak_17737_Old	FBgn0036014	CG3222	0.63275	0.00709277	0.168349
622	3L	23737913	23738278	peak_22227_Young	FBgn0040056	CG17698	-0.455338	0.00710277	0.168349
634	3L	21568794	21569063	peak_21546_Young	FBgn0037102	CG7172	-0.398145	0.00709065	0.168349
648	X	765379	765630	peak_32194_VeryOld	FBgn0015288	RpL22	0.354386	0.00707375	0.168349
720	X	2222519	2222773	peak_32883_Young	FBgn0029606	CG14052	0.27459	0.00705364	0.168349
571	3L	4981033	4981282	peak_16346_Old	FBgn0035584	CG17030	0.643566	0.00718658	0.170007
711	X	16091503	16091763	peak_36988_Young	FBgn0028397	Tob	-0.32949	0.00719502	0.170007
703	2R	21950142	21950395	peak_13185_Young	FBgn0034670	CG13488	-0.290771	0.00725113	0.171068
747	3L	7866083	7866383	peak_17166_Young	FBgn0016694	Pdp1	0.268448	0.00730023	0.171961
577	X	7858315	7858564	peak_34526_Old	FBgn0029964	CG1409	0.681789	0.00734806	0.172026
581	2L	19440514	19440763	peak_6332_Young	FBgn0003346	RanGAP	-0.578198	0.00732135	0.172026
609	2R	22941014	22941266	peak_13591_VeryOld	FBgn0261584	CG42694	-0.583105	0.00733037	0.172026
614	2L	22174274	22174737	peak_7151_Old	FBgn0032981	CG3635	0.479859	0.00734023	0.172026
645	2R	8358763	8359376	peak_8646_Young	FBgn0033283	CG11635	0.388158	0.00738074	0.172526
725	X	7325068	7325327	peak_34418_Young	FBgn0029944	Dok	-0.280057	0.00739391	0.17257
697	3R	7129699	7129963	peak_23605_Young	FBgn0051248	CG31248	-0.309034	0.00742419	0.173012
690	3R	24193347	24193601	peak_28854_Young	FBgn0039165	CG6204	0.310799	0.00745066	0.173364
620	2L	5341099	5341353	peak_1981_VeryOld	FBgn0031703	CG12512	0.457679	0.00746698	0.173479
611	X	7946749	7946998	peak_34576_Young	FBgn0027280	l(1)G0193	-0.539674	0.00752185	0.17396
708	3L	20949948	20950212	peak_21301_Young	FBgn0011591	fng	-0.289602	0.00751372	0.17396
727	3L	246831	247096	peak_14641_Young	FBgn0052476	mthl14	0.289651	0.00752171	0.17396
596	3L	1551670	1551919	peak_15146_Old	FBgn0035231	Cct2	0.597747	0.00756028	0.174584
587	2L	6358826	6359075	peak_2338_Old	FBgn0031804	CG9500	0.624962	0.00764959	0.175057
605	3R	21823749	21823998	peak_28087_Young	FBgn0013759	CASK	-0.559427	0.00763881	0.175057
700	3L	18073741	18074005	peak_20347_Young	FBgn0264746	CG44004	-0.331892	0.0076171	0.175057
713	2L	20758645	20758909	peak_6703_Young	FBgn0011202	dia	-0.32256	0.00762442	0.175057
740	2R	20534270	20534524	peak_12678_Young	FBgn0034512	CG18067	-0.304123	0.00762839	0.175057
760	X	19297979	19298257	peak_38039_Young	FBgn0031011	CG8034	0.263496	0.00764336	0.175057
651	3R	31812454	31812713	peak_31463_Old	FBgn0039883	RhoGAP100F	0.409854	0.00768566	0.17562
598	2R	15836077	15836326	peak_11108_Old	FBgn0003130	Poxn	0.636463	0.00773688	0.176398
638	X	3513015	3513484	peak_33350_Old	FBgn0029669	CG13021	0.43245	0.00774286	0.176398
615	X	15733259	15733535	peak_36870_Old	FBgn0026666	l(1)G0136	0.54593	0.00781135	0.177694
682	X	23105863	23106120	peak_39123_Young	FBgn0039946	ATbp	-0.374	0.00783279	0.177916
742	2R	7492965	7493233	peak_8290_Young	FBgn0263240	Coop	0.280898	0.00786664	0.17842
657	2L	7691629	7692113	peak_2777_Young	FBgn0262880	CG43235	0.410031	0.00789253	0.178741
650	2R	11397328	11397586	peak_9743_Young	FBgn0082585	sprt	-0.427735	0.00793893	0.17926
776	2L	16286611	16286898	peak_5360_Young	FBgn0040079	pkaap	-0.289329	0.00793759	0.17926
635	2L	7665915	7666175	peak_2769_Young	FBgn0040299	Myo28B1	0.462089	0.00799409	0.180239
632	3R	15547185	15547459	peak_26148_Young	FBgn0038349	AOX3	-0.488883	0.00807874	0.181879
726	2R	9137254	9137684	peak_8960_Young	FBgn0028955	CG8788	-0.319323	0.00813804	0.182944
693	X	9692699	9692954	peak_35117_Young	FBgn0000233	btd	-0.385097	0.00817151	0.183157
749	2L	16544783	16545039	peak_5439_Young	FBgn0259735	CG42389	-0.296843	0.00816978	0.183157
677	X	3868816	3869065	peak_33460_VeryOld	FBgn0028491	CG2930	-0.384631	0.00822887	0.184172
661	3L	581552	582107	peak_14786_Young	FBgn0035143	Ppm1	0.416529	0.00824171	0.18419
673	X	4784527	4785065	peak_33739_Old	FBgn0029727	CG6978	0.448237	0.00830966	0.185437
654	2L	10220033	10220342	peak_3580_Young	FBgn0250843	Prosalpha6	-0.490118	0.0083817	0.186499
758	3R	9532970	9533236	peak_24348_Young	FBgn0000244	by	0.280528	0.00837417	0.186499
617	X	5502123	5502372	peak_33881_Old	FBgn0029770	CG4151	0.627173	0.0085491	0.18745
625	2L	17087960	17088209	peak_5603_Old	FBgn0032626	CG12620	0.58494	0.00857163	0.18745
631	3L	20368185	20368516	peak_21078_Young	FBgn0001259	in	0.505143	0.00847128	0.18745
641	2R	12571382	12571754	peak_10079_Old	FBgn0033755	ClC-b	0.509589	0.00858411	0.18745
643	3R	17401708	17401967	peak_26724_Young	FBgn0038504	Sur-8	-0.457043	0.00847344	0.18745
702	3L	18890457	18890714	peak_20577_Young	FBgn0036821	CG3961	-0.36438	0.00845656	0.18745
704	2L	8683749	8684019	peak_3123_Young	FBgn0032058	CG9289	0.372947	0.00850305	0.18745
719	X	141804	142331	peak_31968_VeryOld	FBgn0029128	tyn	0.338143	0.00855884	0.18745
721	2L	8381378	8381866	peak_3015_Young	FBgn0032034	Rcd4	0.311172	0.00857968	0.18745
743	3L	3159197	3159712	peak_15721_Young	FBgn0035405	pfk	0.314914	0.00847857	0.18745
748	3R	26534799	26535076	peak_29571_Mid	FBgn0263289	scrib	-0.335619	0.00853867	0.18745
759	2R	12359220	12359476	peak_10024_Young	FBgn0050043	CG30043	-0.312788	0.00849893	0.18745
795	2L	452926	453178	peak_303_Young	FBgn0031256	CG4164	0.253269	0.00855806	0.18745
818	X	1861448	1861935	peak_32717_Young	FBgn0028969	deltaCOP	0.270295	0.00863706	0.188337
791	2R	16814697	16815162	peak_11453_Young	FBgn0034160	CG5550	-0.276523	0.0086515	0.188383
757	X	11326503	11326766	peak_35616_Young	FBgn0001491	l(1)10Bb	-0.296078	0.0086803	0.188741
623	2L	5965644	5965893	peak_2154_VeryOld	FBgn0086265	psd	0.647984	0.00876032	0.19021
683	3L	21726953	21727214	peak_21625_Young	FBgn0037121	Rpb8	-0.394902	0.00884131	0.191696
669	3L	2950681	2951170	peak_15655_Young	FBgn0052846	CG32846	0.499148	0.00891451	0.193009
714	2R	13295853	13296111	peak_10301_Young	FBgn0052843	Dh31-R	-0.387291	0.00893721	0.193226
801	3R	5838775	5839286	peak_23200_Young	FBgn0037387	CG1213	-0.294903	0.00897913	0.193858
825	3L	319512	319770	peak_14674_Young	FBgn0004373	fwd	0.292309	0.00900945	0.194238
689	3L	4188345	4188598	peak_16078_VeryOld	FBgn0003710	tipE	0.419173	0.00910612	0.196029
744	3R	10109513	10109767	peak_24556_Young	FBgn0028734	Fmr1	-0.30887	0.00911824	0.196029
756	2R	21251321	21251835	peak_12931_Young	FBgn0034606	ASPP	-0.313327	0.00918092	0.197099
646	X	5309405	5309752	peak_33841_Young	FBgn0003449	snf	-0.543966	0.00926083	0.198257
647	3R	11689934	11690186	peak_24982_Young	FBgn0037935	CG6834	-0.548932	0.00925161	0.198257
837	X	19851358	19851612	peak_38258_Young	FBgn0031078	Nup205	-0.309545	0.00929343	0.198676
845	X	20656330	20656599	peak_38504_Young	FBgn0031126	Cyp6v1	-0.347932	0.0093252	0.199077
667	3L	4840106	4840380	peak_16291_Young	FBgn0035578	CG13707	-0.569831	0.00935328	0.199165
824	2R	18356684	18357153	peak_11954_VeryOld	FBgn0010575	sbb	0.283754	0.00935541	0.199165
695	2R	21143182	21143434	peak_12878_Old	FBgn0021872	Xbp1	0.423883	0.00940633	0.199391
806	X	6744229	6744487	peak_34252_Young	FBgn0029897	RpL17	0.300801	0.00940461	0.199391
807	2R	6214416	6214672	peak_7805_Young	FBgn0021847	l(2)k14710	0.287372	0.0094183	0.199391
832	3L	14109880	14110144	peak_19067_Young	FBgn0036411	Sox21a	-0.375313	0.00940696	0.199391
642	2L	780650	780899	peak_445_Old	FBgn0041250	Gr21a	0.626619	0.00954232	0.199759
649	4	625574	625823	peak_31775_Old	FBgn0039914	mav	0.569918	0.00946647	0.199759
652	3R	15369610	15369859	peak_26074_Old	FBgn0038330	CG14868	0.619669	0.00964763	0.199759
666	X	2254120	2254379	peak_32896_VeryOld	FBgn0029608	CG3091	0.50233	0.00956379	0.199759
715	X	6843139	6843416	peak_34290_Young	FBgn0029912	CG4557	-0.372914	0.00961345	0.199759
730	3R	20309912	20310170	peak_27601_Young	FBgn0261550	CG42668	0.343325	0.00950756	0.199759
751	X	127302	127814	peak_31962_Mid	FBgn0025836	RhoGAP1A	0.324885	0.00950528	0.199759
769	2R	17027785	17028050	peak_11516_Young	FBgn0023172	RhoGEF2	0.370061	0.00961771	0.199759
774	2R	17719324	17719589	peak_11767_Young	FBgn0028494	CG6424	-0.400024	0.00965815	0.199759
789	3L	11721079	11721584	peak_18373_Young	FBgn0036199	Bmcp	-0.450016	0.00963689	0.199759
804	2R	25177607	25177887	peak_14516_Mid	FBgn0004181	Peb	0.320032	0.00964373	0.199759
829	3L	28012522	28012781	peak_22382_Young	FBgn0039959	CG17514	-0.353842	0.00952113	0.199759
835	3R	28339665	28339926	peak_30126_Young	FBgn0039581	Moca-cyp	-0.374753	0.00961017	0.199759
856	3L	21348885	21349394	peak_21461_Young	FBgn0037076	ebd2	-0.280117	0.00962116	0.199759
872	2R	17109111	17109366	peak_11553_Young	FBgn0034194	CG15611	0.267145	0.0095706	0.199759
874	3L	18621257	18621526	peak_20472_Young	FBgn0259791	bora	-0.266468	0.00950237	0.199759
886	X	686680	686933	peak_32150_Young	FBgn0021764	sdk	0.246718	0.00947545	0.199759
849	2R	24611316	24611816	peak_14288_Young	FBgn0035039	CG3608	0.281029	0.00968296	0.200001
737	3L	66084	66354	peak_14549_Young	FBgn0002564	Lsp1gamma	0.480712	0.00978097	0.201493
779	X	18864919	18865233	peak_37869_Young	FBgn0085430	CG34401	-0.357648	0.00980802	0.201493
842	X	15886577	15886844	peak_36940_Young	FBgn0260938	tay	-0.266506	0.00980061	0.201493
875	2L	4118891	4119145	peak_1579_Young	FBgn0020376	Sr-CIII	0.282765	0.00980408	0.201493
732	X	2810032	2810574	peak_33130_Young	FBgn0040356	CG12498	0.397073	0.00984196	0.201816
861	2L	7701544	7701801	peak_2780_Young	FBgn0041181	Tep3	0.280124	0.00985016	0.201816
655	3R	30960068	30960335	peak_31123_Old	FBgn0039812	CG15548	0.55684	0.0098841	0.20213
790	3L	16052747	16053010	peak_19653_Young	FBgn0005536	Mbs	-0.366026	0.00989196	0.20213
816	3R	8523680	8523942	peak_24011_Young	FBgn0051259	CG31259	-0.324298	0.00991289	0.202287
799	2L	11210433	11210700	peak_3898_Young	FBgn0264442	ab	-0.32996	0.00994454	0.202662
656	2L	779343	779592	peak_444_Old	FBgn0031277	CG13947	0.57616	0.0100331	0.203381
691	3L	12790041	12790299	peak_18694_Young	FBgn0261674	CG42709	-0.495183	0.0100089	0.203381
810	2L	14524180	14524688	peak_4856_Young	FBgn0053648	CG33648	0.316669	0.0100229	0.203381
904	2R	12951636	12951893	peak_10200_Young	FBgn0265186	CG44251	0.262761	0.00999844	0.203381
705	2R	6196181	6196447	peak_7796_Young	FBgn0262867	Ptr	-0.50363	0.0100966	0.203855
707	3L	8912340	8912636	peak_17546_Young	FBgn0035936	Tsp66E	-0.449216	0.0100867	0.203855
745	2L	22577676	22578167	peak_7192_Mid	FBgn0040011	Slmap	0.433274	0.0100793	0.203855
668	3R	6695505	6695785	peak_23503_Old	FBgn0004781	Ccp84Ac	0.571192	0.0101819	0.204091
698	2L	10964544	10964810	peak_3816_Young	FBgn0261871	dpr2	-0.460299	0.010148	0.204091
755	2L	12044667	12044926	peak_4109_Young	FBgn0032399	CG6785	-0.3503	0.0101788	0.204091
783	X	5086415	5086678	peak_33802_Young	FBgn0029746	CG15465	-0.333883	0.0101963	0.204091
814	3R	25208664	25208928	peak_29167_Young	FBgn0022800	Cad96Ca	-0.335814	0.0102019	0.204091
867	2L	2242192	2242450	peak_985_Young	FBgn0264979	CG4267	-0.275445	0.0101299	0.204091
890	X	12006951	12007205	peak_35851_Young	FBgn0030360	CG1806	-0.273945	0.0101906	0.204091
797	3L	14551198	14551453	peak_19186_Young	FBgn0036428	Gbs-70E	-0.32947	0.0102434	0.204489
911	X	19321959	19322220	peak_38051_Young	FBgn0259834	out	0.274797	0.0102486	0.204489
699	3R	22724450	22724714	peak_28369_Young	FBgn0024958	Irp-1A	-0.459121	0.0102745	0.204739
942	2L	480800	481056	peak_319_Young	FBgn0043364	cbt	0.240134	0.0103064	0.205107
865	2L	9493930	9494205	peak_3359_Young	FBgn0032120	CG33298	-0.284915	0.0103417	0.205542
811	2R	20006790	20007046	peak_12484_Young	FBgn0034480	CG16898	-0.363838	0.0103688	0.205813
786	X	5752312	5752575	peak_33939_Young	FBgn0029799	CG15772	-0.357238	0.0103929	0.206023
729	3R	30527376	30527635	peak_30969_Young	FBgn0027654	jdp	-0.401605	0.0104174	0.20624
724	2R	5307398	5307672	peak_7506_VeryOld	FBgn0261403	sxc	0.42155	0.0104437	0.20641
741	X	5915034	5915333	peak_33991_Young	FBgn0029824	CG3726	-0.502077	0.010453	0.20641
663	2R	21537964	21538213	peak_13032_Young	FBgn0050286	CG30286	-0.625705	0.010494	0.206418
672	2L	17129986	17130275	peak_5611_Mid	FBgn0083942	CG34106	0.637368	0.0104685	0.206418
688	2L	5520500	5520763	peak_2010_Young	FBgn0000318	cl	-0.575029	0.0104858	0.206418
917	2L	6647426	6647714	peak_2432_Young	FBgn0031842	Tango1	-0.265295	0.0105465	0.207185
664	3L	12891162	12891411	peak_18734_Young	FBgn0036323	CG14118	-0.975337	0.0106985	0.208785
674	2R	24474674	24474923	peak_14228_Old	FBgn0035008	CG3494	0.608028	0.0106882	0.208785
676	2R	10646948	10647197	peak_9514_Mid	FBgn0033541	CG12934	0.602951	0.0106649	0.208785
680	3L	4162789	4163038	peak_16068_Old	FBgn0259986	nab	0.609977	0.0108606	0.208785
687	X	3066756	3067005	peak_33219_Old	FBgn0029649	CG4116	0.563434	0.0108584	0.208785
696	3R	11984880	11985170	peak_25082_Young	FBgn0037975	CG3397	-0.555655	0.0107147	0.208785
718	3L	8730140	8730479	peak_17483_Mid	FBgn0000356	Cp16	0.479643	0.0107792	0.208785
752	3L	8834485	8834765	peak_17522_Young	FBgn0052026	CG32026	-0.460568	0.0107597	0.208785
771	2L	14711775	14712037	peak_4942_Young	FBgn0028855	CG15282	0.358427	0.0107914	0.208785
778	X	12060314	12060885	peak_35869_Mid	FBgn0052656	Muc11A	0.407099	0.0106454	0.208785
780	2R	6839062	6839615	peak_8005_Young	FBgn0040674	CG9445	0.350176	0.0108508	0.208785
813	3R	17394537	17394790	peak_26720_Young	FBgn0025456	CREG	0.358415	0.0108353	0.208785
893	X	9109396	9109651	peak_34915_Young	FBgn0030089	AP-1gamma	0.279	0.0107334	0.208785
894	2L	14273450	14273895	peak_4758_Young	FBgn0052971	CG32971	0.298161	0.010801	0.208785
896	3L	14785199	14785710	peak_19254_Young	FBgn0036449	bmm	-0.280061	0.0106745	0.208785
927	3L	542852	543106	peak_14770_Young	FBgn0035142	hipk	0.264608	0.0108252	0.208785
949	2L	3304914	3305181	peak_1321_Young	FBgn0031518	CG3277	0.24599	0.0107599	0.208785
905	X	9500504	9500766	peak_35031_Young	FBgn0261260	mgl	0.295285	0.0108881	0.209051
823	3R	20914054	20914323	peak_27782_Young	FBgn0038842	hdly	-0.353937	0.0109286	0.209565
706	X	9201781	9202036	peak_34941_Young	FBgn0086450	su(r)	-0.514789	0.0109492	0.20965
953	2R	24642242	24642508	peak_14293_Young	FBgn0035043	CG4781	0.243595	0.0109605	0.20965
775	2L	15254504	15254762	peak_5095_Young	FBgn0259982	l(2)35Cc	-0.368274	0.0110328	0.21053
878	3L	19929081	19929367	peak_20931_Young	FBgn0036921	RhoGDI	-0.311761	0.011036	0.21053
887	X	19866981	19867235	peak_38267_Young	FBgn0052529	Hers	-0.304931	0.0110479	0.21053
684	3L	19337465	19337714	peak_20738_Old	FBgn0003089	pip	0.627053	0.0111425	0.212069
820	2L	3172707	3172968	peak_1285_Young	FBgn0031512	CG15404	0.351729	0.01119	0.212708
876	2R	9115980	9116232	peak_8947_Young	FBgn0003612	Su(var)2-10	0.285096	0.0112252	0.213111
772	2L	19533042	19533296	peak_6378_Old	FBgn0053116	CG33116	0.398111	0.0112456	0.213234
884	2L	8437007	8437507	peak_3042_Young	FBgn0002887	mus201	0.307918	0.0112909	0.213298
897	3L	3127620	3127881	peak_15713_Young	FBgn0026189	prominin-like	0.306289	0.0112795	0.213298
943	2R	15931255	15931807	peak_11150_Young	FBgn0034049	bdg	0.262139	0.0112898	0.213298
777	2L	3426063	3426332	peak_1355_Young	FBgn0031530	pgant2	-0.461043	0.0113118	0.213428
781	2L	9569723	9569983	peak_3404_Young	FBgn0032130	CG3838	-0.41485	0.0114345	0.214679
785	2R	18179239	18179510	peak_11904_Young	FBgn0034314	nopo	-0.47281	0.0114484	0.214679
853	2L	20104570	20104837	peak_6536_Young	FBgn0032851	CG13970	0.322616	0.0114379	0.214679
877	3R	21112031	21112298	peak_27853_Young	FBgn0015790	Rab11	-0.332129	0.0114137	0.214679
933	X	12905302	12905565	peak_36053_Young	FBgn0030433	mRpL49	-0.269611	0.0114168	0.214679
860	3R	30039145	30039841	peak_30780_Young	FBgn0003510	Sry-alpha	0.296488	0.0114756	0.214924
750	3L	9370860	9371149	peak_17656_Mid	FBgn0001228	Hsp67Bb	0.417051	0.0116019	0.216839
767	2R	21264998	21265478	peak_12933_Old	FBgn0050391	CG30391	0.44195	0.0116205	0.216839
919	3R	16171797	16172053	peak_26378_Young	FBgn0038404	CG8925	0.291901	0.0116185	0.216839
746	3L	3892002	3892261	peak_15975_Mid	FBgn0026592	Fie	0.494295	0.0117026	0.218106
701	3R	21139786	21140035	peak_27863_Old	FBgn0264357	SNF4Agamma	0.737327	0.0117892	0.218414
717	2L	1709412	1709661	peak_802_Young	FBgn0031357	mRpL48	-0.614097	0.0117888	0.218414
722	3R	20503709	20503962	peak_27644_Young	FBgn0002869	MtnB	-0.577176	0.0117877	0.218414
891	2R	21295921	21296182	peak_12941_Young	FBgn0261554	CG42672	0.283626	0.0117907	0.218414
920	3L	3035390	3035645	peak_15678_Young	FBgn0035388	CG2162	-0.302261	0.011755	0.218414
996	3R	7967866	7968142	peak_23844_Young	FBgn0000504	dsx	-0.307901	0.0118548	0.219335
765	2R	21341905	21342267	peak_12966_Old	FBgn0034622	CG15666	0.397125	0.0118855	0.219372
885	3L	18987256	18987966	peak_20610_VeryOld	FBgn0036836	CG11619	0.313901	0.0118807	0.219372
723	3R	6340201	6340450	peak_23377_Old	FBgn0037430	Osi20	0.511535	0.0119332	0.219986
710	3R	14846032	14846281	peak_25918_Old	FBgn0038266	CG3610	0.616896	0.0119933	0.220827
728	2L	13107325	13107598	peak_4376_Young	FBgn0032470	CG5142	0.488487	0.0120114	0.220894
766	2L	9540041	9540298	peak_3387_Young	FBgn0032124	CG17855	0.420335	0.0120325	0.221016
964	X	13403638	13403904	peak_36199_Young	FBgn0030484	GstT4	-0.285313	0.012088	0.221769
848	3L	20493719	20494139	peak_21143_Young	FBgn0037000	ZnT77C	-0.372335	0.0121414	0.222214
883	2R	19456273	19456540	peak_12313_Young	FBgn0002716	mei-W68	0.303702	0.012137	0.222214
851	3L	15815643	15815902	peak_19574_Young	FBgn0015025	CkIIalpha-i1	-0.347065	0.0121712	0.222492
712	3L	11172788	11173037	peak_18200_Young	FBgn0036143	CG14142	-0.707273	0.0122586	0.223021
731	2L	1238815	1239094	peak_637_Old	FBgn0031327	CG5397	0.546013	0.0122422	0.223021
768	X	2919436	2919692	peak_33162_Young	FBgn0025643	CG3588	-0.462155	0.0122341	0.223021
955	X	20173204	20173690	peak_38362_Young	FBgn0000084	AnxB10	-0.272569	0.0122504	0.223021
773	X	16700976	16701354	peak_37174_Young	FBgn0030773	CG9676	0.436715	0.0122735	0.223028
788	2L	7753192	7753663	peak_2788_Old	FBgn0267689	CG46025	0.415863	0.0122923	0.223102
870	2L	8542262	8542521	peak_3089_Young	FBgn0011259	Sema-1a	0.363575	0.0123824	0.224471
935	3L	264634	265129	peak_14652_Young	FBgn0035122	mRpL17	0.313783	0.0124511	0.225449
869	2L	10056775	10057038	peak_3556_Young	FBgn0267727	Pen	-0.349102	0.0125025	0.225844
968	2R	7381772	7382042	peak_8239_Young	FBgn0033159	Dscam1	-0.255353	0.0124958	0.225844
854	2R	15693887	15694379	peak_11074_VeryOld	FBgn0053460	CG33460	0.405666	0.0125536	0.226498
888	3R	19648693	19648946	peak_27382_Mid	FBgn0051220	CG31220	0.333413	0.0125824	0.22675
923	2L	1970488	1970754	peak_886_Young	FBgn0031375	erm	-0.330678	0.0126191	0.227143
993	2R	23383853	23384116	peak_13758_Young	FBgn0040660	CG13551	0.274329	0.0127008	0.228076
1019	3R	14031428	14032195	peak_25657_Young	FBgn0038195	CG3061	0.235979	0.0126988	0.228076
846	X	13624268	13624531	peak_36228_Young	FBgn0030505	NFAT	0.346104	0.0127627	0.22865
1045	X	2137990	2138252	peak_32838_Young	FBgn0004861	ph-p	0.235415	0.0127553	0.22865
734	3L	21193829	21194078	peak_21403_Old	FBgn0259239	CG42337	0.560558	0.0128126	0.228736
738	2L	12824275	12824524	peak_4295_Old	FBgn0015399	kek1	0.550817	0.0128116	0.228736
796	2L	13835727	13835992	peak_4604_Young	FBgn0028509	CenG1A	-0.410789	0.0128157	0.228736
958	X	8592784	8593052	peak_34788_Young	FBgn0025864	Crag	-0.26597	0.0128275	0.228736
859	2L	10356673	10356936	peak_3641_Young	FBgn0032229	CG5045	0.385785	0.0129037	0.229827
739	3R	21139125	21139374	peak_27862_Old	FBgn0264357	SNF4Agamma	0.587406	0.0130341	0.230611
754	3L	22502589	22502908	peak_21988_Mid	FBgn0263036	CG43331	0.464567	0.0129639	0.230611
936	3R	14655576	14655831	peak_25848_Young	FBgn0086686	l(3)L1231	0.298067	0.0130131	0.230611
971	3L	1188877	1189136	peak_15004_Young	FBgn0035186	CG13912	-0.303074	0.01302	0.230611
990	X	18137555	18137815	peak_37612_Young	FBgn0262874	CG43229	-0.260747	0.013015	0.230611
992	2R	14255695	14256187	peak_10621_Young	FBgn0033918	CG8531	0.266767	0.0130383	0.230611
959	2R	22242784	22243040	peak_13304_Young	FBgn0020307	dve	0.301311	0.0130743	0.230979
928	2R	21168542	21168800	peak_12895_Young	FBgn0034598	CG4266	0.307703	0.0131029	0.231218
985	3R	8106117	8106379	peak_23885_Young	FBgn0243512	puc	-0.301136	0.0131194	0.231241
858	3L	14614197	14614474	peak_19199_Young	FBgn0003388	shd	-0.404523	0.0131407	0.23135
862	2L	11790348	11790901	peak_4023_Mid	FBgn0032375	CG14932	0.437114	0.013189	0.231932
830	X	17245226	17245705	peak_37346_Mid	FBgn0030833	CG8915	0.411696	0.0132242	0.232283
974	2R	17457294	17457795	peak_11669_Young	FBgn0028953	CG14478	0.27618	0.013274	0.232891
761	2R	11322336	11322617	peak_9709_Old	FBgn0003382	sha	0.524172	0.0133128	0.233303
736	3R	18759454	18759703	peak_27113_Young	FBgn0038651	CG14299	-0.719941	0.0133551	0.233712
879	3R	14662826	14663316	peak_25853_Young	FBgn0038252	BigH1	0.364258	0.0133668	0.233712
762	X	1346883	1347133	peak_32456_Young	FBgn0024361	Tsp2A	-0.591445	0.0133881	0.233816
1014	2R	22312303	22312567	peak_13328_Young	FBgn0034718	wdp	0.262307	0.0134195	0.234097
871	3R	6335999	6336536	peak_23373_Old	FBgn0037429	Osi19	0.402952	0.0134846	0.234935
1047	X	20159031	20159293	peak_38353_Young	FBgn0031090	Rab35	-0.254798	0.0134983	0.234935
808	2L	16545285	16545561	peak_5440_Old	FBgn0259735	CG42389	0.428413	0.0135728	0.235962
753	2R	22455049	22455298	peak_13394_Old	FBgn0034731	CG10384	0.602235	0.0136996	0.23655
787	2R	18406382	18406653	peak_11965_VeryOld	FBgn0063492	GstE8	0.488825	0.0136252	0.23655
826	3R	6286557	6286836	peak_23358_Young	FBgn0037421	CG15594	-0.45583	0.0136814	0.23655
889	2R	24197669	24197920	peak_14098_Young	FBgn0034989	CG3356	-0.334726	0.0136774	0.23655
906	3L	11631285	11631549	peak_18341_VeryOld	FBgn0052091	CG32091	0.338061	0.0136859	0.23655
1052	2R	22312678	22312937	peak_13329_Young	FBgn0034718	wdp	0.260766	0.0136719	0.23655
1006	X	6195153	6196365	peak_34083_Young	FBgn0052750	CG32750	0.333597	0.0137983	0.237717
1028	X	13303915	13304176	peak_36155_Young	FBgn0266375	IP3K2	-0.312401	0.0137962	0.237717
821	2L	7401862	7402114	peak_2681_Young	FBgn0031907	CG5171	-0.450305	0.0138505	0.23808
983	X	16270845	16271099	peak_37015_Young	FBgn0030731	Mfe2	-0.273559	0.0138381	0.23808
1100	2R	13953967	13954225	peak_10504_Young	FBgn0050481	mRpL53	0.241029	0.0138947	0.23857
770	3L	3616082	3616369	peak_15884_Old	FBgn0035453	CG10357	0.545747	0.0139569	0.239369
763	2L	11149208	11149457	peak_3880_Old	FBgn0010197	Gyc32E	0.581362	0.0142233	0.239631
764	2L	2844690	2844939	peak_1144_Old	FBgn0031470	CG18557	0.598232	0.0140752	0.239631
794	X	8468081	8468382	peak_34734_Old	FBgn0030041	CG12116	0.522597	0.0142772	0.239631
803	3L	5899788	5900083	peak_16554_Old	FBgn0052409	CG32409	0.486729	0.0142931	0.239631
809	2R	22820208	22820573	peak_13544_Mid	FBgn0259179	CG42284	0.477187	0.0140517	0.239631
836	2L	20017213	20017467	peak_6507_Young	FBgn0264443	CG43861	-0.430201	0.0142365	0.239631
839	2L	5624069	5624328	peak_2048_Young	FBgn0031726	Cyp6a16	-0.423455	0.0140843	0.239631
840	3R	7912421	7912795	peak_23823_Mid	FBgn0014930	CG2846	0.441222	0.0142715	0.239631
881	3L	16287711	16288225	peak_19733_Old	FBgn0036595	CG13046	0.381109	0.0140754	0.239631
902	2L	18823406	18823663	peak_6090_Young	FBgn0032713	CG17323	-0.430658	0.0141101	0.239631
937	3R	11211544	11211798	peak_24841_Young	FBgn0037873	SdhC	-0.335646	0.01421	0.239631
938	2L	20869993	20870258	peak_6756_Mid	FBgn0032900	CG14401	0.328343	0.0141865	0.239631
948	3L	21741606	21742353	peak_21634_Old	FBgn0037128	CG14572	0.335801	0.0143019	0.239631
975	2L	9763406	9764167	peak_3474_Young	FBgn0025117	und	-0.31131	0.0142089	0.239631
986	X	10658652	10659633	peak_35408_Young	FBgn0030223	CG2111	0.320552	0.0141309	0.239631
1000	2R	21634553	21634809	peak_13072_Young	FBgn0034643	CG10321	0.298038	0.0142378	0.239631
1034	2L	4030322	4030573	peak_1555_Young	FBgn0000547	ed	0.280861	0.0141878	0.239631
1064	3R	23781644	23781897	peak_28707_Young	FBgn0015513	mbc	0.253198	0.0140016	0.239631
1066	X	11492987	11493242	peak_35670_Young	FBgn0052666	Drak	0.266578	0.0142476	0.239631
1082	3L	22741632	22741888	peak_22095_Young	FBgn0037188	CG7369	0.243072	0.0140687	0.239631
1088	3R	17135793	17136058	peak_26663_Young	FBgn0038484	CG5246	0.262999	0.0142679	0.239631
782	3R	29667309	29667558	peak_30629_Old	FBgn0039677	ppk30	0.572271	0.0143391	0.239992
792	2L	2287551	2287800	peak_991_Old	FBgn0051681	CG31681	0.515848	0.0143733	0.240074
1044	X	1026599	1026856	peak_32296_Young	FBgn0040337	CG3021	0.279171	0.0143804	0.240074
1141	3R	29781988	29782249	peak_30677_Young	FBgn0039694	fig	0.242349	0.0143913	0.240074
970	3L	16281294	16282095	peak_19729_Old	FBgn0040796	CG13064	0.326788	0.0144249	0.240197
1035	3L	19991768	19992275	peak_20947_Young	FBgn0013303	Nca	-0.247622	0.0144301	0.240197
798	2L	13955950	13956199	peak_4638_Old	FBgn0261514	NimA	0.52471	0.0144875	0.240629
1026	3R	18297691	18297946	peak_26962_Young	FBgn0024432	Dlc90F	-0.281559	0.0144866	0.240629
784	3L	9065881	9066146	peak_17589_Young	FBgn0000116	Argk	-0.561809	0.0145278	0.240763
864	2R	19714987	19715285	peak_12400_Young	FBgn0034472	CG8517	-0.443719	0.0145429	0.240763
1007	X	6266118	6266433	peak_34105_Young	FBgn0028982	Spt6	-0.335246	0.0145194	0.240763
838	3L	232687	232959	peak_14639_Old	FBgn0262035	CG42846	0.499691	0.0145898	0.241015
1001	2R	14756165	14756869	peak_10774_Young	FBgn0033961	CG12859	0.290001	0.014574	0.241015
1175	2R	6501770	6502035	peak_7848_Young	FBgn0086655	jing	0.216445	0.0146286	0.241396
873	3R	31406942	31407191	peak_31290_Young	FBgn0039846	CG11337	-0.397735	0.0146527	0.241532
850	3R	10709261	10709528	peak_24719_Young	FBgn0051278	CG31278	-0.455629	0.0147194	0.241588
915	X	15804577	15804836	peak_36907_VeryOld	FBgn0003345	sd	0.385143	0.0146884	0.241588
1011	2L	19425214	19425720	peak_6323_Young	FBgn0041789	Pax	-0.304465	0.0147169	0.241588
1099	2L	16533303	16533562	peak_5434_Young	FBgn0032587	CG5953	-0.278442	0.014685	0.241588
1135	X	15860563	15860816	peak_36928_Young	FBgn0001105	Gbeta13F	0.248217	0.0147857	0.242416
800	3R	10783540	10783802	peak_24735_Old	FBgn0260944	Rbp1	0.587328	0.0148462	0.242619
834	X	19082190	19082486	peak_37941_Old	FBgn0030981	CG14191	0.509634	0.0148776	0.242619
852	3R	11683734	11684098	peak_24980_Young	FBgn0037934	CG6830	0.433959	0.0148433	0.242619
892	X	11128939	11129202	peak_35583_Young	FBgn0010391	Gtp-bp	-0.383207	0.0148633	0.242619
1075	2R	20996517	20996786	peak_12808_Young	FBgn0034570	CG10543	-0.24379	0.0148532	0.242619
802	3R	14383008	14383257	peak_25764_Old	FBgn0038225	soti	0.563639	0.0149213	0.242813
898	X	8081634	8081919	peak_34620_Young	FBgn0029994	CG2254	-0.42089	0.0149162	0.242813
833	2L	7402227	7402476	peak_2682_Young	FBgn0031907	CG5171	-0.501518	0.0149862	0.243349
1070	X	769898	770157	peak_32197_Young	FBgn0027343	fz3	0.255182	0.014972	0.243349
1079	2L	5542903	5543170	peak_2018_Young	FBgn0002525	Lam	-0.270412	0.0150021	0.243349
844	2R	18173227	18173483	peak_11901_Old	FBgn0034312	CG10916	0.498876	0.0151037	0.244737
841	2L	10743526	10743785	peak_3771_Mid	FBgn0032296	CG6729	0.45637	0.0151447	0.245142
843	2L	13966538	13966828	peak_4646_Young	FBgn0028543	NimB2	0.452193	0.0151808	0.245466
805	3R	24161079	24161328	peak_28844_Old	FBgn0039158	CG6182	0.537327	0.0152212	0.245858
815	2R	20788864	20789113	peak_12751_Old	FBgn0263741	CG43666	0.543474	0.015247	0.24589
819	2R	17049401	17049650	peak_11524_Old	FBgn0034184	CG9646	0.534063	0.0152897	0.24589
1107	2L	9567538	9567803	peak_3400_Young	FBgn0032130	CG3838	-0.273592	0.0153037	0.24589
1113	3R	14558011	14558293	peak_25818_Young	FBgn0038237	Pde6	-0.260955	0.0152803	0.24589
1146	3L	17622471	17622728	peak_20202_Young	FBgn0036741	CG7510	0.269746	0.0152593	0.24589
793	2L	885047	885296	peak_494_Young	FBgn0031292	CG15824	-0.667177	0.0153646	0.24661
1112	2L	11358582	11358839	peak_3932_Young	FBgn0000287	salr	-0.292472	0.0154267	0.247346
969	3L	1189139	1189395	peak_15005_Young	FBgn0035186	CG13912	-0.348907	0.0154836	0.247737
972	2L	8043271	8043523	peak_2897_Young	FBgn0031981	CG7466	0.334997	0.0154716	0.247737
812	3L	3713768	3714017	peak_15915_Young	FBgn0262535	CG43089	-0.574249	0.01575	0.249274
817	3L	5365351	5365600	peak_16425_Young	FBgn0260856	Membrin	-0.573071	0.015767	0.249274
828	2L	10427577	10427826	peak_3683_Old	FBgn0032247	CG5188	0.529549	0.0156705	0.249274
918	3R	4749736	4749992	peak_22713_Mid	FBgn0010750	atms	0.399247	0.0157919	0.249274
997	2L	6673782	6674043	peak_2446_Young	FBgn0028990	Spn27A	0.334717	0.0156446	0.249274
1031	2R	22373179	22373500	peak_13356_Young	FBgn0034722	Rtf1	-0.33331	0.0157469	0.249274
1036	X	5678631	5678894	peak_33907_Young	FBgn0003747	Gr5a	-0.28461	0.0156771	0.249274
1090	2L	6733205	6734553	peak_2463_Young	FBgn0031853	TTLL3B	0.297582	0.0157536	0.249274
1093	3R	7967039	7967298	peak_23843_Young	FBgn0000504	dsx	-0.276108	0.0157809	0.249274
1104	3R	26535598	26535855	peak_29573_Young	FBgn0263289	scrib	-0.28184	0.0157883	0.249274
1105	2R	25011888	25012143	peak_14449_Young	FBgn0004055	uzip	0.266726	0.0157492	0.249274
1125	2L	15425908	15426181	peak_5140_Young	FBgn0001983	wor	-0.268802	0.0157031	0.249274
1186	3L	10202571	10202829	peak_17928_Young	FBgn0000451	ect	0.25102	0.0156357	0.249274
1010	2L	827162	827479	peak_463_Young	FBgn0031286	CG3862	-0.344438	0.0158237	0.249517
822	3L	12415513	12415762	peak_18590_Old	FBgn0052103	CG32103	0.584866	0.0158763	0.249573
827	X	18359133	18359382	peak_37676_Old	FBgn0030914	CG6106	0.544792	0.0158712	0.249573
1056	2R	6716019	6716273	peak_7949_Young	FBgn0033095	CG3409	0.279499	0.0158454	0.249573
1073	3R	29199935	29200199	peak_30492_Young	FBgn0014427	CG11899	-0.356176	0.0158994	0.249629
1092	2R	22561930	22562185	peak_13436_Young	FBgn0034737	CG11362	0.266814	0.0159125	0.249629
1017	2R	14482150	14482439	peak_10687_Young	FBgn0001332	L	-0.33724	0.0160287	0.250422
1039	X	1407454	1407734	peak_32487_Young	FBgn0259108	futsch	0.319684	0.0159852	0.250422
1072	3R	14903946	14904208	peak_25934_Young	FBgn0028662	VhaPPA1-1	-0.281831	0.0160176	0.250422
1115	X	9608788	9609045	peak_35071_Young	FBgn0261931	CG42797	0.279972	0.0160096	0.250422
855	X	21193572	21193887	peak_38650_VeryOld	FBgn0031163	CG14579	0.485699	0.0160802	0.25097
952	2L	5706227	5706559	peak_2068_Young	FBgn0031730	CG7236	-0.366997	0.0161075	0.251139
967	2L	3332114	3332631	peak_1331_Young	FBgn0031523	CG15408	0.378811	0.0161906	0.252176
880	3L	10876813	10877163	peak_18098_Young	FBgn0036105	Blos4	0.458444	0.0162168	0.252327
1142	3R	4952565	4952819	peak_22800_Young	FBgn0004436	Ubc6	0.251671	0.0162384	0.252406
908	2R	9136780	9137029	peak_8959_Young	FBgn0028955	CG8788	-0.424171	0.0162769	0.252413
946	X	14247956	14248232	peak_36440_Young	FBgn0002873	mud	-0.399161	0.0163215	0.252413
1060	3L	8057585	8057847	peak_17221_Young	FBgn0026263	bip1	-0.297835	0.0163118	0.252413
1128	3R	27253778	27254292	peak_29816_Young	FBgn0010441	pll	-0.275426	0.0163147	0.252413
1164	X	5517082	5517350	peak_33883_Young	FBgn0029771	CG12730	-0.246632	0.0163023	0.252413
1037	X	19522236	19522494	peak_38120_Young	FBgn0261573	CoRest	0.28352	0.0163422	0.252477
1122	X	11600765	11601042	peak_35712_Young	FBgn0030318	rho-4	0.27605	0.0163841	0.252869
1016	2L	9706352	9706605	peak_3458_Young	FBgn0051710	CG31710	-0.305912	0.0164121	0.253044
914	2R	24903584	24903833	peak_14402_Young	FBgn0066084	RpL41	-0.411507	0.0165397	0.253128
954	2R	24779733	24780014	peak_14347_Mid	FBgn0035063	Eap	0.398977	0.0165667	0.253128
1029	3R	19902655	19902952	peak_27479_Young	FBgn0038745	CG4538	-0.294822	0.0164701	0.253128
1080	X	7015153	7015409	peak_34341_Young	FBgn0029928	CG3032	-0.281984	0.0165548	0.253128
1121	4	67143	67401	peak_31601_Young	FBgn0085432	pan	-0.303241	0.0164853	0.253128
1126	3R	23157213	23157480	peak_28495_Young	FBgn0004395	unk	-0.264557	0.0164988	0.253128
1133	X	10009859	10010596	peak_35173_Young	FBgn0030170	CG2990	-0.294295	0.0164688	0.253128
1176	3R	11569027	11569292	peak_24940_Young	FBgn0037913	fabp	-0.253705	0.0165547	0.253128
1190	X	17702149	17703146	peak_37491_Young	FBgn0026192	par-6	0.227852	0.0165446	0.253128
1087	3R	18198765	18199021	peak_26926_Young	FBgn0011481	Ssdp	-0.299539	0.0166195	0.25368
1167	2R	19669142	19669398	peak_12380_Young	FBgn0028372	isopeptidase-T-3	-0.23423	0.016662	0.254074
1098	2L	11446095	11446357	peak_3958_Young	FBgn0261648	salm	-0.34133	0.016686	0.254187
831	3R	6762255	6762504	peak_23524_Young	FBgn0000071	Ama	-0.635846	0.0167513	0.254718
1157	X	19890950	19891205	peak_38280_Young	FBgn0086782	amn	-0.243856	0.0167542	0.254718
900	3R	14569113	14569394	peak_25821_VeryOld	FBgn0038243	CG8066	0.444596	0.0168068	0.254821
1021	X	12028253	12028526	peak_35861_Young	FBgn0030366	Usp7	-0.304405	0.0168081	0.254821
1187	X	16559528	16559779	peak_37113_Young	FBgn0011826	Pp2B-14D	-0.283082	0.0168111	0.254821
857	3L	17254288	17254537	peak_20082_Young	FBgn0036704	CG6497	-0.547608	0.0169209	0.256002
1129	2R	23940245	23940497	peak_13972_Young	FBgn0023477	Tal	0.283115	0.0169392	0.256002
1163	2L	5547009	5547270	peak_2021_Young	FBgn0031717	Oscillin	-0.260674	0.0169393	0.256002
925	2L	5924088	5924372	peak_2144_Old	FBgn0015381	dsf	0.411853	0.0169892	0.256501
961	3R	12406490	12406774	peak_25212_Old	FBgn0038038	CG5167	0.362088	0.0170259	0.256802
847	X	19812932	19813181	peak_38247_Old	FBgn0026174	SkpD	0.68744	0.0170717	0.257238
1159	3R	22042595	22042851	peak_28176_Young	FBgn0264491	how	-0.252549	0.0171286	0.257841
947	2R	5803212	5803496	peak_7605_VeryOld	FBgn0085414	dpr12	0.450318	0.0171615	0.25785
1058	2R	7699374	7699636	peak_8381_Young	FBgn0050493	CG30493	0.3052	0.017163	0.25785
930	2R	11345721	11346108	peak_9719_Young	FBgn0010357	betaTry	0.416599	0.017257	0.258942
1069	X	6986405	6986707	peak_34329_Mid	FBgn0261284	bou	0.36447	0.0172696	0.258942
863	X	16843248	16843497	peak_37220_Old	FBgn0024941	RSG7	0.589849	0.0173335	0.259646
1063	2R	12612298	12612566	peak_10093_Mid	FBgn0004435	Galphaq	0.332466	0.017394	0.260296
950	3R	7240355	7240746	peak_23644_Old	FBgn0037488	CG14607	0.422099	0.017423	0.260475
866	3L	21195193	21195442	peak_21404_Old	FBgn0085290	CG34261	0.629049	0.0174846	0.260884
1057	X	437332	437588	peak_32045_Young	FBgn0011822	pcl	0.336749	0.0174684	0.260884
1232	X	6866045	6866304	peak_34305_Young	FBgn0029915	CG14434	-0.242272	0.0175158	0.261096
994	2L	16041846	16042101	peak_5308_Young	FBgn0000182	BicC	-0.345757	0.017544	0.26126
1003	3R	6173382	6174003	peak_23313_Old	FBgn0037406	Osi1	0.383191	0.0176803	0.263033
1192	3R	8477609	8477864	peak_24005_Young	FBgn0266801	CG45263	0.281485	0.0177212	0.263385
1188	X	2743643	2743897	peak_33106_Young	FBgn0024980	Syx4	-0.264485	0.0177901	0.264152
882	2L	22173970	22174219	peak_7150_VeryOld	FBgn0032981	CG3635	0.580762	0.0178503	0.264531
1140	2L	12719115	12719422	peak_4273_Young	FBgn0032456	MRP	-0.284852	0.0178343	0.264531
1004	3R	18403139	18403392	peak_26998_Old	FBgn0038619	CG7685	0.337283	0.0178881	0.264833
1109	2R	19977080	19977542	peak_12476_Young	FBgn0034479	CG8654	-0.291967	0.0179239	0.265107
895	3L	4482919	4483168	peak_16170_Old	FBgn0035552	CG11350	0.500785	0.0179971	0.265592
1074	3R	9573557	9573824	peak_24368_Young	FBgn0037714	CG9396	-0.328746	0.0180089	0.265592
1205	2R	17392459	17392722	peak_11639_Young	FBgn0010620	Sip1	-0.239636	0.0179898	0.265592
1106	X	2172385	2172651	peak_32853_Young	FBgn0025839	CG3621	0.320683	0.0180327	0.265686
1008	2R	25176982	25177239	peak_14515_VeryOld	FBgn0004181	Peb	0.381527	0.0181784	0.267029
1025	2L	13398841	13399097	peak_4473_Young	FBgn0032521	CG7110	-0.329446	0.0181684	0.267029
1198	2R	21159941	21160195	peak_12889_Young	FBgn0050389	CG30389	0.273305	0.0181611	0.267029
1303	2L	18455557	18456361	peak_5936_Young	FBgn0032680	Ntf-2r	-0.236141	0.0181938	0.267029
907	3R	6335413	6335678	peak_23372_Old	FBgn0037429	Osi19	0.484683	0.0183594	0.2692
868	2R	24579683	24579932	peak_14280_Old	FBgn0020521	pio	0.641879	0.0183938	0.269447
1194	2R	16187841	16188130	peak_11257_Young	FBgn0034086	CG8441	-0.270896	0.0184261	0.269661
903	X	12495488	12495737	peak_35928_Old	FBgn0030396	CG2556	0.539244	0.0185156	0.269678
987	3R	15800480	15800978	peak_26223_Old	FBgn0038365	CG9593	0.386503	0.0184482	0.269678
1020	2L	10339316	10339568	peak_3635_Young	FBgn0019932	SamDC	-0.331771	0.0185126	0.269678
1068	2R	12355578	12355883	peak_10022_VeryOld	FBgn0050049	CG30049	0.324959	0.01849	0.269678
1286	3L	18064792	18065056	peak_20345_Young	FBgn0000568	Eip75B	-0.230049	0.0184806	0.269678
995	2L	7799103	7799379	peak_2798_Young	FBgn0031951	r2d2	-0.38969	0.0186864	0.271906
901	3L	22788896	22789145	peak_22107_Old	FBgn0037191	CG14448	0.539012	0.0187809	0.272187
912	2R	14420014	14420279	peak_10673_Young	FBgn0033936	CG17386	-0.513511	0.0187949	0.272187
1086	3L	2658495	2659101	peak_15556_Young	FBgn0053233	CG33233	0.341456	0.0187856	0.272187
1258	3R	14088181	14088722	peak_25681_Young	FBgn0038198	Npc2b	0.293006	0.0187904	0.272187
1359	2L	15432523	15432778	peak_5143_Young	FBgn0028892	CG4161	0.250776	0.0187479	0.272187
934	3R	4126840	4127123	peak_22475_Old	FBgn0027341	Gfat1	0.467902	0.0188393	0.272306
951	X	15569242	15569553	peak_36816_Old	FBgn0030653	CG7860	0.440846	0.0188443	0.272306
1123	3R	24295690	24295976	peak_28896_Young	FBgn0259685	crb	-0.351304	0.0188566	0.272306
910	2L	729259	729508	peak_424_Old	FBgn0011244	Hsp60B	0.541021	0.0188911	0.272315
922	3R	9495721	9496015	peak_24327_Old	FBgn0043791	CG8147	0.493647	0.0188929	0.272315
1041	2R	17568082	17568340	peak_11716_Young	FBgn0034243	Ns2	0.326499	0.0189181	0.27242
913	3L	15484989	15485238	peak_19451_Old	FBgn0036497	Ran-like	0.516446	0.019041	0.273189
916	2L	6688155	6688404	peak_2450_Old	FBgn0031849	CG11327	0.581832	0.0190536	0.273189
1089	3R	20560754	20561168	peak_27663_VeryOld	FBgn0038803	CG5191	0.308033	0.0190419	0.273189
1094	X	6255702	6256218	peak_34101_Young	FBgn0015818	Spx	0.303148	0.0190929	0.273189
1130	X	15453273	15453525	peak_36767_Young	FBgn0030638	CG11655	0.314157	0.0190426	0.273189
1155	X	16323116	16323379	peak_37041_Young	FBgn0052579	CG32579	0.327724	0.0190967	0.273189
1169	2L	7203594	7203932	peak_2629_Mid	FBgn0031896	CG4502	0.274726	0.0190928	0.273189
1046	2R	8064984	8065233	peak_8519_Young	FBgn0033252	CG12769	-0.35112	0.0191695	0.273973
899	X	1200334	1200583	peak_32369_Old	FBgn0040358	CG14625	0.609521	0.0192646	0.274053
909	3L	16318612	16318861	peak_19750_Young	FBgn0036606	CG13060	-0.592749	0.0192292	0.274053
980	2L	9431559	9431829	peak_3347_Mid	FBgn0011232	scat	0.442937	0.0192614	0.274053
1191	3R	31747781	31748042	peak_31428_Young	FBgn0022349	CG1910	0.261504	0.019272	0.274053
1193	2R	17846769	17847069	peak_11801_Young	FBgn0015522	olf186-M	-0.258983	0.0192828	0.274053
1316	2R	18855077	18855331	peak_12117_Young	FBgn0010053	Jheh1	0.213467	0.0192764	0.274053
1173	3L	11098494	11098991	peak_18184_Young	FBgn0261112	APP-BP1	0.283274	0.0193237	0.274378
1015	2L	16255849	16256098	peak_5342_Young	FBgn0028515	EndoGI	-0.388221	0.019361	0.274399
1174	2R	10026687	10026944	peak_9283_Young	FBgn0033473	CG12128	0.307604	0.0193791	0.274399
1363	X	1051301	1051556	peak_32310_Young	FBgn0040398	CG14629	0.220633	0.0193638	0.274399
1101	3R	23346075	23346344	peak_28565_Young	FBgn0264326	DNApol-epsilon255	-0.383891	0.0194428	0.274791
1160	3L	21225769	21226018	peak_21421_Young	FBgn0004865	Eip78C	-0.324052	0.0194365	0.274791
1311	3L	1178154	1178410	peak_15003_Young	FBgn0025525	bab2	-0.26273	0.0194676	0.274888
924	2R	11861387	11861636	peak_9903_Old	FBgn0085259	CG34230	0.524784	0.019623	0.275839
939	2R	23997022	23997271	peak_13998_Old	FBgn0034951	CG3860	0.528407	0.0196254	0.275839
957	X	1216477	1216758	peak_32381_VeryOld	FBgn0040366	CG11398	0.449986	0.0195818	0.275839
1002	X	22487336	22487585	peak_38887_Young	FBgn0027279	l(1)G0196	-0.400277	0.0196236	0.275839
1216	2R	4471467	4471721	peak_7417_Young	FBgn0260798	Gprk1	0.32265	0.0195873	0.275839
1218	2R	21160206	21160459	peak_12890_Young	FBgn0050389	CG30389	0.272023	0.0196938	0.276546
1183	X	9251235	9251492	peak_34958_Young	FBgn0030114	CG17754	-0.276666	0.0198223	0.27764
1222	2L	3655864	3656122	peak_1432_Young	FBgn0000721	for	-0.280689	0.019826	0.27764
1231	3R	9767686	9767941	peak_24435_Young	FBgn0037747	CG8481	0.254142	0.0198262	0.27764
1059	3R	22027588	22027844	peak_28168_Young	FBgn0019957	ND42	0.349968	0.0198691	0.27779
1209	2R	7496175	7496432	peak_8291_Young	FBgn0033183	CG1620	0.297138	0.0198915	0.27779
1247	3R	30014481	30014771	peak_30772_Young	FBgn0039737	CG7920	0.282594	0.019886	0.27779
982	X	13396072	13396339	peak_36196_Young	FBgn0030482	CG1673	-0.429062	0.0199459	0.27804
1217	2L	19099974	19100245	peak_6188_Young	FBgn0032755	CG17344	-0.275064	0.0199372	0.27804
926	3R	21404129	21404378	peak_27965_Old	FBgn0038887	CG7907	0.625855	0.0200815	0.278214
1022	2L	4003289	4003580	peak_1545_Young	FBgn0031579	CG15422	-0.401052	0.0200751	0.278214
1116	2R	10042878	10043277	peak_9290_Old	FBgn0085249	CG34220	0.460984	0.0200711	0.278214
1134	3R	21269292	21269868	peak_27920_Young	FBgn0038876	CG5919	-0.316572	0.0200056	0.278214
1162	2R	24514924	24515180	peak_14247_Young	FBgn0259185	Ir60b	-0.284043	0.020047	0.278214
1239	2R	8649387	8649652	peak_8766_Young	FBgn0003892	ptc	-0.284527	0.0200859	0.278214
1322	2R	17535468	17535722	peak_11697_Young	FBgn0034237	eIF3-S9	0.241692	0.0199913	0.278214
921	3R	16356040	16356289	peak_26466_Young	FBgn0038420	CG10311	-0.579473	0.0202903	0.278354
929	3R	27705650	27705899	peak_29975_Young	FBgn0039544	CG12877	-0.562503	0.0202612	0.278354
931	X	13556950	13557199	peak_36214_Old	FBgn0052631	CG32631	0.584239	0.0203282	0.278354
940	3R	31680160	31680409	peak_31399_VeryOld	FBgn0039864	CG11550	0.542786	0.0203978	0.278354
945	X	8460803	8461052	peak_34731_Young	FBgn0023506	Es2	-0.56494	0.0202733	0.278354
965	2R	16652301	16652550	peak_11410_VeryOld	FBgn0020506	Amyrel	0.460841	0.0203969	0.278354
966	2R	19396609	19396885	peak_12285_Mid	FBgn0034443	cer	-0.441918	0.0202962	0.278354
1048	2L	3619518	3619990	peak_1415_Old	FBgn0015663	Dot	0.390123	0.0203887	0.278354
1137	2L	16819897	16820168	peak_5545_Young	FBgn0032609	CG13280	-0.319742	0.0203207	0.278354
1166	X	20661697	20661991	peak_38508_Young	FBgn0031127	CG1835	-0.314271	0.0202932	0.278354
1215	3L	8425108	8425373	peak_17358_Young	FBgn0020224	Cbl	-0.268628	0.0202703	0.278354
1270	2R	9414961	9415491	peak_9075_Young	FBgn0041087	wun2	0.23262	0.0204061	0.278354
1281	3R	26866498	26866980	peak_29676_Young	FBgn0001197	His2Av	-0.25203	0.0203358	0.278354
1285	2R	16815286	16815546	peak_11454_Young	FBgn0034160	CG5550	-0.247097	0.0202452	0.278354
1305	2R	18536488	18536756	peak_12009_Young	FBgn0266488	CG45087	-0.248298	0.0201332	0.278354
1390	2L	481176	481453	peak_320_Young	FBgn0043364	cbt	0.215299	0.0203653	0.278354
1429	X	581879	582137	peak_32106_Young	FBgn0261930	vnd	0.192005	0.0203591	0.278354
989	X	9202253	9202502	peak_34942_Young	FBgn0086450	su(r)	-0.450346	0.0204451	0.278389
1180	2R	20671325	20671589	peak_12721_Young	FBgn0034543	CG30152	-0.289786	0.0204376	0.278389
1324	3L	342930	343186	peak_14686_Young	FBgn0035132	mthl10	0.230762	0.0204815	0.278636
944	2L	12172437	12172686	peak_4143_Young	FBgn0032421	crok	-0.536394	0.0205624	0.279395
1237	X	16385136	16385666	peak_37065_Young	FBgn0030745	CG4239	0.269681	0.0205739	0.279395
1108	3L	203914	204184	peak_14618_VeryOld	FBgn0024945	NitFhit	0.344371	0.0205955	0.27944
1012	3L	6264515	6264785	peak_16671_Young	FBgn0001258	ImpL3	-0.385644	0.0206231	0.279566
941	2R	23351041	23351290	peak_13740_Young	FBgn0085239	CG34210	-0.572102	0.0206583	0.279794
932	3R	18082037	18082286	peak_26901_Old	FBgn0038566	CG14317	0.58699	0.0207901	0.280617
984	3L	15924863	15925122	peak_19605_VeryOld	FBgn0036544	sff	0.483728	0.0208109	0.280617
998	3R	13192009	13192368	peak_25429_Young	FBgn0038125	CG8141	0.432872	0.0207994	0.280617
1207	2R	7916377	7916637	peak_8459_Young	FBgn0015509	Cul1	0.291911	0.0207994	0.280617
1298	X	16217529	16217796	peak_37013_Young	FBgn0000459	disco	-0.248112	0.0207994	0.280617
962	X	23023720	23023973	peak_39085_Young	FBgn0265767	zyd	-0.478915	0.0208851	0.280845
978	2L	6360104	6360386	peak_2339_VeryOld	FBgn0031804	CG9500	0.507934	0.0209056	0.280845
1027	2R	8906395	8906858	peak_8867_Young	FBgn0050349	CG30349	-0.410894	0.0208999	0.280845
1206	X	22964041	22964348	peak_39061_Young	FBgn0069973	CG40485	-0.312305	0.0208807	0.280845
1318	3L	9614729	9614989	peak_17744_Young	FBgn0267348	LanB2	-0.247065	0.0209198	0.280845
1030	X	8490787	8491044	peak_34744_VeryOld	FBgn0003023	otu	0.42715	0.0210142	0.281863
956	2L	9010420	9010669	peak_3232_Young	FBgn0032087	CG9568	-0.51908	0.0210447	0.282025
1358	3L	18185615	18185874	peak_20381_Young	FBgn0003997	hid	-0.238142	0.0210931	0.282425
1013	X	19260493	19260761	peak_38020_Young	FBgn0040068	Vav	-0.42507	0.0211376	0.282525
1229	2L	6921466	6921972	peak_2533_Young	FBgn0004838	Hrb27C	-0.257938	0.0211212	0.282525
1242	2R	17444856	17445120	peak_11666_Young	FBgn0027506	EDTP	0.283205	0.0212213	0.282901
1282	X	656225	656479	peak_32140_Young	FBgn0025637	SkpA	0.283992	0.021194	0.282901
1388	3R	16224639	16224896	peak_26404_Young	FBgn0040071	tara	-0.319245	0.0212038	0.282901
1219	X	12017824	12018410	peak_35856_Young	FBgn0030364	CG15735	-0.312172	0.0213887	0.284883
1009	2R	21342338	21342612	peak_12967_Old	FBgn0034622	CG15666	0.461094	0.0214363	0.28502
1033	2L	3023342	3023600	peak_1224_Young	FBgn0031492	CG3542	0.414916	0.0214238	0.28502
1177	2R	20354723	20354987	peak_12640_Mid	FBgn0034507	CG11192	0.306924	0.0215607	0.286265
1233	3R	8684940	8685229	peak_24063_Young	FBgn0265158	CG44227	-0.302899	0.0215674	0.286265
979	3L	6093459	6093708	peak_16619_Old	FBgn0035678	CG10469	0.52321	0.0216491	0.28682
1351	3R	30902595	30903106	peak_31104_Young	FBgn0053483	CG33483	-0.230757	0.0216656	0.28682
1371	X	2194674	2194979	peak_32864_Young	FBgn0029603	CG14053	0.247423	0.0216418	0.28682
988	2L	19048979	19049231	peak_6168_Young	FBgn0032746	CG10470	-0.464611	0.0217695	0.287776
1161	2L	8197073	8197569	peak_2948_Old	FBgn0031996	CG8460	0.343003	0.0217755	0.287776
1220	3L	1177190	1177481	peak_15002_Young	FBgn0025525	bab2	-0.351142	0.0217993	0.287782
1381	2R	13222272	13222524	peak_10285_Young	FBgn0011763	Dp	0.230625	0.0218136	0.287782
1360	2L	12055233	12055759	peak_4114_Young	FBgn0032404	RpL7-like	-0.25781	0.0218373	0.287846
1131	2R	9389864	9390191	peak_9062_Young	FBgn0010549	l(2)03659	-0.357606	0.0218653	0.287965
1071	3L	56647	56911	peak_14546_Young	FBgn0262679	CG43149	0.417076	0.0219499	0.28883
1050	X	17842019	17842301	peak_37527_Young	FBgn0000617	e(y)1	-0.401953	0.0219757	0.288921
963	2L	21096750	21097020	peak_6861_Young	FBgn0083972	CG34136	-0.579217	0.0220465	0.28915
1201	3R	18395654	18395914	peak_26990_Young	FBgn0264751	CG44009	-0.355828	0.02205	0.28915
1362	3L	20395511	20395766	peak_21094_Young	FBgn0053969	CG33969	0.240588	0.0220406	0.28915
960	2L	16729302	16729551	peak_5500_Old	FBgn0051812	CG31812	0.550731	0.0221944	0.2904
999	3L	8731579	8731837	peak_17484_Young	FBgn0000356	Cp16	0.525078	0.0223355	0.2904
1054	2R	25139685	25140025	peak_14503_Old	FBgn0262566	CG43106	0.404037	0.0223215	0.2904
1182	2R	23882041	23882542	peak_13946_Old	FBgn0025336	CG4882	0.303677	0.0221668	0.2904
1339	3L	15988118	15988639	peak_19621_Young	FBgn0259824	Hip14	-0.248952	0.0223326	0.2904
1343	X	3949769	3950030	peak_33494_Young	FBgn0029687	Vap-33A	-0.241385	0.0223256	0.2904
1345	3L	17495792	17496048	peak_20148_Young	FBgn0052185	edin	-0.240841	0.0222773	0.2904
1391	2R	7045285	7045538	peak_8093_Young	FBgn0033134	Tsp42El	0.2193	0.022279	0.2904
1393	X	2447834	2448332	peak_32991_Young	FBgn0004050	z	0.229301	0.0222759	0.2904
1416	X	15333258	15333521	peak_36744_Young	FBgn0026428	HDAC6	-0.241359	0.0222671	0.2904
976	3L	20110707	20110956	peak_20977_Old	FBgn0036937	Ir76b	0.561641	0.0223547	0.290402
1127	3L	16302595	16303054	peak_19738_Young	FBgn0262894	CG43249	0.391968	0.0223975	0.29071
1132	2L	18120141	18120559	peak_5848_Mid	FBgn0032666	CG5758	0.397454	0.0227415	0.294087
1230	3R	27922635	27922893	peak_30026_Young	FBgn0003279	RpL4	-0.344598	0.022754	0.294087
1332	2R	24964993	24965255	peak_14431_Young	FBgn0035087	CG2765	0.251438	0.0227091	0.294087
1378	2L	13165752	13166009	peak_4393_Young	FBgn0024291	Sir2	-0.238936	0.0227092	0.294087
1389	3L	1302311	1303066	peak_15061_Young	FBgn0035203	CG9149	0.226854	0.0227176	0.294087
1342	2R	25011392	25011657	peak_14448_Young	FBgn0004055	uzip	0.242151	0.0228231	0.294731
981	3L	15662340	15662589	peak_19526_Old	FBgn0014850	Eig71Ej	0.555511	0.022943	0.295031
1061	2R	9611415	9611681	peak_9152_Old	FBgn0033437	CG12926	0.434231	0.0228712	0.295031
1097	3L	895924	896332	peak_14919_Young	FBgn0054057	CG34057	0.404424	0.0229051	0.295031
1341	2L	2886730	2886992	peak_1167_Young	FBgn0041111	lilli	-0.269983	0.0229313	0.295031
1380	X	14212196	14212460	peak_36424_Young	FBgn0040153	l(1)G0469	-0.292393	0.0228944	0.295031
1049	X	18661574	18661824	peak_37782_Old	FBgn0030947	CG6696	0.478621	0.0230039	0.295565
1065	2R	12355967	12356216	peak_10023_Old	FBgn0050049	CG30049	0.420609	0.0231856	0.297379
1181	3R	7129404	7129661	peak_23604_Young	FBgn0051248	CG31248	-0.331908	0.0232317	0.297379
1368	3R	23679913	23680567	peak_28664_Young	FBgn0040227	eIF-3p66	0.247185	0.0232424	0.297379
1459	3R	14361912	14362178	peak_25756_Young	FBgn0051320	CG31320	0.235976	0.0231843	0.297379
1503	3R	19934943	19935203	peak_27500_Young	FBgn0021776	mira	0.225367	0.0232171	0.297379
973	2L	1613245	1613494	peak_776_Young	FBgn0021906	RFeSP	-0.64174	0.0234499	0.297867
991	3L	20111162	20111411	peak_20978_Old	FBgn0036937	Ir76b	0.544521	0.0234555	0.297867
1005	3R	15138696	15138945	peak_25978_Old	FBgn0038292	CG3987	0.49492	0.0233873	0.297867
1038	2L	13968360	13968700	peak_4648_Old	FBgn0028936	NimB5	0.486999	0.0234668	0.297867
1195	3L	3052022	3052292	peak_15688_Young	FBgn0035392	CG1271	-0.327386	0.0233528	0.297867
1225	4	1084692	1084954	peak_31900_Young	FBgn0024913	Actbeta	-0.319784	0.0234203	0.297867
1257	3L	8127446	8127949	peak_17261_Young	FBgn0010350	CdsA	0.293309	0.0234739	0.297867
1328	X	15886870	15887126	peak_36941_Young	FBgn0260938	tay	-0.260233	0.0234758	0.297867
1365	X	5083529	5084009	peak_33798_Young	FBgn0029746	CG15465	-0.257869	0.0233683	0.297867
1472	3L	7359950	7360212	peak_16987_Young	FBgn0035771	Sec63	0.21708	0.0233429	0.297867
1023	3R	6691305	6691554	peak_23500_Old	FBgn0004780	Ccp84Ad	0.483386	0.0235177	0.297905
1208	3L	882861	883110	peak_14915_Young	FBgn0035173	CG13907	-0.301681	0.0235008	0.297905
977	2L	5268425	5268674	peak_1947_Young	FBgn0031695	Cyp4ac3	-0.640189	0.0235933	0.297906
1018	X	18849305	18849556	peak_37863_Young	FBgn0030966	CG7280	-0.546016	0.0236176	0.297906
1078	X	842878	843140	peak_32231_Mid	FBgn0029535	CG14635	0.453844	0.0236535	0.297906
1249	2L	12110832	12111645	peak_4135_Old	FBgn0263235	Phae2	0.306953	0.023558	0.297906
1290	2L	19547372	19547630	peak_6383_Young	FBgn0041180	Tep4	-0.289493	0.0236597	0.297906
1435	2L	16826956	16827747	peak_5547_Young	FBgn0051739	CG31739	-0.219672	0.0236378	0.297906
1439	X	1275851	1276109	peak_32422_Young	FBgn0028550	Atf3	0.243076	0.023674	0.297906
1498	2L	18319914	18320172	peak_5906_Young	FBgn0000636	Fas3	-0.261656	0.0235453	0.297906
1364	2R	16007284	16007821	peak_11178_Young	FBgn0034063	CG8389	0.247013	0.0237316	0.298385
1321	2R	21685141	21685658	peak_13091_Young	FBgn0034654	CG10306	0.290016	0.0238137	0.299058
1423	2L	3606534	3606804	peak_1411_Young	FBgn0002985	odd	0.234919	0.0238243	0.299058
1062	2L	1134378	1134627	peak_595_Young	FBgn0031306	CG4577	0.451685	0.0238844	0.299235
1083	2L	5527959	5528223	peak_2014_Young	FBgn0051915	CG31915	-0.409712	0.0238973	0.299235
1235	3L	8953161	8953421	peak_17555_Young	FBgn0040321	GNBP3	-0.328966	0.0238706	0.299235
1289	3R	15277733	15278226	peak_26029_Young	FBgn0011476	l(3)neo43	0.271759	0.024047	0.300863
1067	3L	12842970	12843240	peak_18719_Young	FBgn0036316	CG10960	-0.449563	0.0242005	0.301548
1200	2R	18172009	18172296	peak_11899_Young	FBgn0034312	CG10916	-0.331591	0.0241599	0.301548
1221	3R	21498971	21499495	peak_27984_Mid	FBgn0004863	C15	0.337986	0.0241917	0.301548
1272	3R	20761908	20762458	peak_27732_Young	FBgn0051195	CG31195	0.266071	0.0241736	0.301548
1556	2R	10076215	10076530	peak_9307_Young	FBgn0033482	CG1371	0.207753	0.0241324	0.301548
1236	2L	3017449	3017928	peak_1221_Young	FBgn0031490	CG17264	0.310564	0.0242318	0.301692
1607	2R	23979533	23980076	peak_13991_Young	FBgn0005612	Sox14	0.19929	0.0243566	0.302998
1110	3R	16172108	16172433	peak_26379_Old	FBgn0038404	CG8925	0.398178	0.0244349	0.303725
1043	2L	3825849	3826147	peak_1497_Old	FBgn0003430	slp1	0.507643	0.0244897	0.3041
1053	2R	5663778	5664029	peak_7543_Young	FBgn0033029	Not3	-0.487571	0.0245493	0.3041
1077	2L	18829705	18829974	peak_6091_Young	FBgn0015808	ScpX	-0.449309	0.0245156	0.3041
1171	2L	10732064	10732510	peak_3766_Mid	FBgn0032293	Dpy-30L1	-0.348416	0.0246475	0.3041
1268	2L	6036581	6037065	peak_2193_Mid	FBgn0051643	CG31643	0.285831	0.0245619	0.3041
1271	2L	19542765	19543291	peak_6381_Young	FBgn0003231	ref(2)P	-0.273581	0.0247041	0.3041
1326	3L	18869049	18869778	peak_20571_Young	FBgn0085284	Blos3	0.268204	0.024626	0.3041
1327	2L	6255988	6256862	peak_2301_VeryOld	FBgn0031791	AANATL2	0.28173	0.0246508	0.3041
1397	3L	21770460	21770721	peak_21646_Young	FBgn0037133	CG7370	-0.236645	0.0245707	0.3041
1480	3R	30151726	30151984	peak_30823_Young	FBgn0039748	CG15529	0.252953	0.0247019	0.3041
1518	2L	21237671	21238137	peak_6915_Young	FBgn0261239	Hr39	-0.251191	0.024689	0.3041
1522	2L	20417305	20417558	peak_6613_Young	FBgn0032859	Arpc2	-0.231188	0.0246959	0.3041
1136	3R	4397487	4397736	peak_22574_Old	FBgn0037242	CG9855	0.408143	0.0248031	0.304896
1266	2L	20917941	20918201	peak_6781_Young	FBgn0032901	sky	-0.298325	0.0248087	0.304896
1240	2L	5209623	5209887	peak_1930_Young	FBgn0031689	Cyp28d1	0.334409	0.0249203	0.30602
1103	3L	14131339	14131595	peak_19075_Young	FBgn0042630	Sox21b	-0.427305	0.0250475	0.307151
1156	3L	22749290	22749554	peak_22097_Mid	FBgn0052451	SPoCk	0.434912	0.0251073	0.307151
1372	2L	17260668	17260927	peak_5634_Mid	FBgn0032629	beat-IIIc	0.335612	0.025113	0.307151
1379	2R	14600838	14601348	peak_10733_Young	FBgn0050077	Blos1	0.275514	0.0250799	0.307151
1536	3R	30387778	30388038	peak_30913_Young	FBgn0015221	Fer2LCH	0.231157	0.0250866	0.307151
1557	X	3555720	3555977	peak_33367_Young	FBgn0052792	ppk8	0.214535	0.0251452	0.307298
1042	X	17398082	17398331	peak_37383_Old	FBgn0011758	B-H1	0.518944	0.0252562	0.307373
1055	3L	22909578	22909827	peak_22148_Old	FBgn0037206	CG12768	0.468405	0.0252136	0.307373
1255	X	9609055	9609310	peak_35072_Young	FBgn0261931	CG42797	0.309603	0.0251917	0.307373
1357	3L	11684061	11684326	peak_18356_Young	FBgn0036191	Sug	-0.261986	0.0252721	0.307373
1406	2L	21795338	21795603	peak_7036_Young	FBgn0051612	CG31612	-0.294733	0.0251997	0.307373
1515	3R	18226572	18227045	peak_26937_Young	FBgn0262559	Mdh2	-0.243883	0.0252584	0.307373
1032	2L	7475227	7475476	peak_2703_Old	FBgn0031920	CG6441	0.515905	0.0253267	0.30758
1114	X	15986384	15986678	peak_36967_Old	FBgn0030718	CG9172	0.423044	0.0253294	0.30758
1024	3L	16358712	16358961	peak_19773_Young	FBgn0266417	CG45057	-0.569612	0.025432	0.30858
1091	2L	11930021	11930270	peak_4062_Young	FBgn0264815	Pde1c	-0.473342	0.0254623	0.308674
1202	2R	18426298	18426553	peak_11973_Young	FBgn0034346	CG12263	0.34184	0.0254802	0.308674
1436	2L	1986347	1986604	peak_894_Young	FBgn0031381	Npc2a	-0.268492	0.0255052	0.308732
1377	2R	17726753	17727006	peak_11770_Young	FBgn0034266	CG4975	0.273095	0.0255507	0.308842
1642	2L	1420426	1420680	peak_706_Young	FBgn0002543	lea	0.231475	0.0255547	0.308842
1395	3L	12146379	12146630	peak_18525_Young	FBgn0013997	Nrx-IV	0.261957	0.0256219	0.309409
1492	3L	224897	225434	peak_14632_Young	FBgn0035113	pyx	0.249841	0.0257062	0.310181
1051	3L	6139365	6139614	peak_16631_Old	FBgn0020640	Lcp65Ae	0.570055	0.0257976	0.310793
1451	2R	13438640	13439184	peak_10337_VeryOld	FBgn0259221	CG42321	0.244922	0.0257949	0.310793
1248	3R	25316134	25316414	peak_29218_Young	FBgn0039323	CG10559	-0.347793	0.0258756	0.311241
1340	X	2336387	2336653	peak_32937_Young	FBgn0044047	Ilp6	-0.306409	0.0258734	0.311241
1524	X	9500932	9501197	peak_35032_Young	FBgn0261260	mgl	0.238331	0.0259259	0.311601
1256	2R	14212339	14212830	peak_10602_Young	FBgn0005613	Sox15	-0.326489	0.0260204	0.312491
1124	2R	22042430	22042739	peak_13209_Old	FBgn0005778	PpD5	0.421211	0.0260614	0.312737
1300	2R	7961763	7962245	peak_8480_Young	FBgn0026361	2020-09-05	-0.293735	0.0261913	0.314049
1120	2R	17045867	17046181	peak_11520_Old	FBgn0034183	CG9642	0.471318	0.0262409	0.314396
1179	2R	7675815	7676198	peak_8368_VeryOld	FBgn0033208	mRpL52	0.357536	0.0263016	0.314849
1671	X	1183253	1183529	peak_32361_Young	FBgn0040360	CG14626	0.199182	0.02632	0.314849
1474	3L	22267713	22267970	peak_21869_Young	FBgn0004179	Csp	-0.26071	0.0264234	0.31584
1084	2R	23183167	23183416	peak_13669_Old	FBgn0034833	CG13539	0.474953	0.0264882	0.316366
1111	3R	15332741	15333033	peak_26056_Young	FBgn0013269	FK506-bp1	-0.459823	0.0265097	0.316375
1040	3R	26655508	26655757	peak_29624_Young	FBgn0243586	Tb	-0.579068	0.0265379	0.316464
1572	X	1900042	1900756	peak_32734_Young	FBgn0000117	arm	0.235677	0.0265813	0.316735
1147	3R	16180533	16180797	peak_26384_Young	FBgn0038405	CG8927	-0.439464	0.0266234	0.316988
1076	3R	22325836	22326085	peak_28243_Old	FBgn0263117	CG34377	0.504304	0.0267426	0.317477
1153	X	245458	245730	peak_31988_Old	FBgn0040372	G9a	0.474594	0.0266947	0.317477
1204	3R	11992633	11993112	peak_25089_Young	FBgn0260745	mfas	-0.362968	0.0267684	0.317477
1301	X	479232	479492	peak_32062_Young	FBgn0052817	CG32817	0.334962	0.0267323	0.317477
1555	X	19637887	19638143	peak_38170_Young	FBgn0031047	Rcd-1	-0.231902	0.0267482	0.317477
1467	2R	21389220	21389484	peak_12989_Young	FBgn0034629	Acox57D-d	-0.261978	0.0268013	0.31762
1606	3L	20230439	20230697	peak_21025_Young	FBgn0036956	CG13813	-0.200923	0.0268235	0.317637
1102	2R	16869252	16869501	peak_11475_Young	FBgn0034162	CG6426	-0.492049	0.0268492	0.317695
1118	2R	5496916	5497165	peak_7528_Old	FBgn0050438	CG30438	0.439397	0.0270622	0.318241
1168	X	5809492	5809830	peak_33956_Old	FBgn0029812	Prosbeta2R1	0.47931	0.0270365	0.318241
1213	3L	22274970	22275316	peak_21871_Old	FBgn0025702	srpk79D	0.430186	0.0269875	0.318241
1250	3L	3373797	3374055	peak_15809_Young	FBgn0035443	CG12010	0.345981	0.0269684	0.318241
1253	2L	11278145	11278406	peak_3915_Young	FBgn0032358	Ppt2	-0.353512	0.0269255	0.318241
1313	2L	9431295	9431551	peak_3346_Young	FBgn0011232	scat	0.325817	0.0270255	0.318241
1384	3R	24625784	24626034	peak_28989_VeryOld	FBgn0039213	atl	0.275798	0.0270402	0.318241
1448	2R	22669211	22669479	peak_13489_Young	FBgn0034763	RYBP	-0.243333	0.0270443	0.318241
1117	2R	12670122	12670371	peak_10114_Young	FBgn0261673	nemy	-0.450017	0.0271698	0.31862
1254	3L	16647520	16647794	peak_19864_Young	FBgn0000017	Abl	0.339358	0.0271222	0.31862
1356	3R	8286980	8287261	peak_23936_Mid	FBgn0037562	CG11671	0.268183	0.0271779	0.31862
1425	2L	2646620	2647554	peak_1085_Old	FBgn0264433	CG43851	0.31176	0.0271497	0.31862
1119	X	10928133	10928393	peak_35525_Young	FBgn0030251	CG2145	0.486007	0.027241	0.318765
1427	2R	6714596	6714942	peak_7945_Young	FBgn0033095	CG3409	-0.317123	0.0272304	0.318765
1446	2R	8568391	8568678	peak_8726_Young	FBgn0033304	Cyp6a13	-0.247494	0.0272532	0.318765
1482	2R	20835127	20835386	peak_12764_VeryOld	FBgn0011674	insc	0.38102	0.0272738	0.318765
1172	X	10838979	10839228	peak_35490_Young	FBgn0040850	CG15210	-0.392515	0.0273128	0.318969
1461	2L	3835300	3835558	peak_1499_Young	FBgn0004567	slp2	-0.26137	0.027333	0.318969
1081	2L	13967657	13967906	peak_4647_Old	FBgn0028543	NimB2	0.523574	0.0273916	0.319248
1520	3L	7978866	7979122	peak_17202_Young	FBgn0011817	nmo	0.23244	0.0273988	0.319248
1251	2L	3786269	3786522	peak_1486_Young	FBgn0031571	CG3921	-0.337932	0.0275547	0.32082
1554	X	17579741	17579999	peak_37446_Young	FBgn0030847	CG12991	0.221308	0.0276306	0.321458
1519	X	2293753	2294010	peak_32911_Young	FBgn0003079	phl	0.246893	0.0276548	0.321495
1095	2L	4579620	4579869	peak_1749_Old	FBgn0031613	HP6	0.515894	0.027696	0.321514
1383	X	1466858	1467121	peak_32531_Young	FBgn0026872	CG14777	-0.302607	0.0276986	0.321514
1592	X	245813	246069	peak_31989_Young	FBgn0040372	G9a	0.21027	0.0277722	0.322124
1617	X	2732091	2732597	peak_33103_Young	FBgn0024975	CG2712	0.217304	0.0278324	0.322577
1144	X	22528797	22529086	peak_38898_Mid	FBgn0262866	S6kII	0.48163	0.027888	0.322731
1308	2R	13498922	13499188	peak_10364_Young	FBgn0033845	mars	-0.40486	0.0278821	0.322731
1085	3L	12432596	12432845	peak_18593_Mid	FBgn0036285	toe	0.517756	0.0279197	0.322853
1644	2R	21701226	21701484	peak_13098_Young	FBgn0004362	HmgD	0.219689	0.0279444	0.322895
1096	2R	21347404	21347653	peak_12971_Old	FBgn0034623	CG9822	0.51098	0.028018	0.3235
1789	3R	26020736	26020999	peak_29425_Young	FBgn0002609	E(spl)m3-HLH	0.181803	0.028056	0.323694
1288	2L	16356590	16356845	peak_5389_Young	FBgn0025678	CaBP1	-0.312553	0.0281238	0.324035
1366	3R	26228191	26228477	peak_29478_Young	FBgn0039419	CG12290	0.301583	0.028128	0.324035
1465	3R	17054577	17054832	peak_26627_Young	FBgn0020493	Dad	-0.276156	0.0281871	0.32447
1158	3R	29220652	29220901	peak_30504_Old	FBgn0029176	Ef1gamma	0.468259	0.0285154	0.32783
1263	2L	782227	782703	peak_448_VeryOld	FBgn0031279	CG3544	0.34738	0.0285434	0.32783
1628	3L	3303593	3304085	peak_15768_Young	FBgn0035431	CG14968	0.205722	0.0285363	0.32783
1149	X	17698673	17698922	peak_37489_Young	FBgn0263258	chas	-0.470914	0.0285861	0.328073
1475	X	8897574	8897827	peak_34851_Young	FBgn0011661	Moe	0.261012	0.0286868	0.328489
1582	2R	19268861	19269130	peak_12227_Young	FBgn0003254	rib	-0.246716	0.0286728	0.328489
1618	3R	25625995	25626258	peak_29320_Young	FBgn0039349	Ssadh	0.250719	0.0286618	0.328489
1493	3L	8115530	8116031	peak_17255_Young	FBgn0026252	msk	0.245151	0.0287295	0.328731
1189	2R	9161353	9161637	peak_8976_Old	FBgn0033387	CG8008	0.409278	0.0287553	0.32878
1148	3L	994308	994557	peak_14941_Old	FBgn0035179	CG12038	0.467196	0.0287865	0.32889
1143	3R	25907685	25907934	peak_29395_Old	FBgn0250757	CG42235	0.480424	0.028899	0.328977
1150	X	6081461	6081726	peak_34053_Mid	FBgn0029839	CG4660	0.551321	0.0290862	0.328977
1264	2R	15614104	15614362	peak_11058_Young	FBgn0260429	CG42524	0.362002	0.0291228	0.328977
1265	2L	1129569	1129851	peak_594_Young	FBgn0031304	CG4552	-0.342618	0.0289763	0.328977
1287	X	1710286	1710812	peak_32656_Mid	FBgn0025378	CG3795	0.413544	0.0291113	0.328977
1292	2L	25028	25302	peak_118_Young	FBgn0031209	Ir21a	0.395962	0.0288226	0.328977
1302	X	2077148	2077401	peak_32811_Old	FBgn0025624	CG4025	0.352811	0.029139	0.328977
1325	3R	25789875	25790353	peak_29372_Old	FBgn0051093	CG31093	0.345249	0.0289926	0.328977
1330	2R	22066225	22066484	peak_13218_Young	FBgn0265184	CG44249	-0.348237	0.0290929	0.328977
1400	3R	28340635	28340893	peak_30128_Young	FBgn0039581	Moca-cyp	-0.277606	0.0289772	0.328977
1464	2L	8933777	8934050	peak_3203_Young	FBgn0032074	Tsp29Fa	-0.316981	0.0291378	0.328977
1541	2R	22854147	22854405	peak_13559_Young	FBgn0010078	RpL23	-0.247069	0.028986	0.328977
1547	3R	29027102	29027587	peak_30417_Young	FBgn0039623	CG1951	0.24286	0.0290194	0.328977
1550	3R	9339023	9339296	peak_24268_Young	FBgn0266410	CG45050	-0.241016	0.0289808	0.328977
1558	2L	2752694	2752953	peak_1114_Young	FBgn0031453	Bacc	0.258901	0.0288621	0.328977
1613	2R	9577915	9578174	peak_9135_Young	FBgn0033426	CG1814	0.213139	0.0290647	0.328977
1139	2R	7443107	7443356	peak_8260_Young	FBgn0033170	sPLA2	0.460105	0.029259	0.329358
1394	3R	4419001	4419659	peak_22588_Young	FBgn0052944	CG32944	0.300465	0.0292269	0.329358
1580	X	2080430	2080687	peak_32813_Young	FBgn0040395	Unc-76	0.251478	0.0292477	0.329358
1594	2R	14219716	14219968	peak_10605_Young	FBgn0033913	CG8468	0.260047	0.0292303	0.329358
1234	3R	31168082	31168467	peak_31186_Mid	FBgn0086704	stops	0.365269	0.0293445	0.330077
1138	X	6834507	6834756	peak_34287_Old	FBgn0029909	CG12796	0.564377	0.0293753	0.33018
1647	3L	12526352	12527132	peak_18620_Young	FBgn0004926	eIF-2beta	0.224986	0.0294045	0.330265
1567	3R	23933758	23934305	peak_28762_Young	FBgn0039130	CG5854	0.229838	0.0294494	0.330359
1693	3R	8181488	8181746	peak_23907_Young	FBgn0001138	grn	-0.218335	0.0294561	0.330359
1154	3R	5358372	5358621	peak_22986_Old	FBgn0250746	Prosbeta7	0.480423	0.0294867	0.330459
1214	2L	7157562	7157836	peak_2616_Old	FBgn0085407	Pvf3	0.390043	0.0295165	0.33055
1410	3R	10264696	10264992	peak_24599_Young	FBgn0262617	CG43143	-0.284839	0.0296096	0.33135
1486	2L	6683766	6684498	peak_2448_Young	FBgn0028703	Nhe3	-0.286351	0.0296705	0.33136
1529	3L	18901214	18901712	peak_20586_Young	FBgn0036827	CG6843	0.25075	0.0296605	0.33136
1629	3L	224281	224546	peak_14630_Young	FBgn0053229	CG33229	0.230327	0.0296757	0.33136
1274	2R	4829398	4829676	peak_7467_Mid	FBgn0033000	CG14464	0.375258	0.0297259	0.331678
1491	2R	14575341	14575709	peak_10722_VeryOld	FBgn0010397	LamC	0.273815	0.0298042	0.332309
1197	X	23013880	23014129	peak_39083_Young	FBgn0039965	CG13865	-0.419798	0.0298487	0.332562
1697	X	1922825	1923076	peak_32743_Young	FBgn0023508	Ocrl	0.228744	0.0299921	0.333916
1599	2R	4012691	4012951	peak_7377_Young	FBgn0046706	Haspin	0.266156	0.0300787	0.334546
1605	3R	23818858	23819109	peak_28719_Young	FBgn0053111	CG33111	0.245695	0.0300925	0.334546
1267	3R	27063670	27064081	peak_29764_Old	FBgn0039478	Nep5	0.393205	0.030126	0.334675
1387	3R	25323202	25323893	peak_29224_Old	FBgn0039326	CG10562	0.321314	0.0302884	0.336235
1152	3R	7366507	7366756	peak_23684_Old	FBgn0004172	Mst84Da	0.560087	0.0306282	0.338872
1165	3R	31235025	31235274	peak_31217_Old	FBgn0039833	CG15564	0.477268	0.0306329	0.338872
1542	2R	12034180	12034475	peak_9948_Young	FBgn0033677	CG8321	0.245308	0.0306311	0.338872
1692	X	9658841	9659096	peak_35094_Young	FBgn0028341	l(1)G0232	0.225788	0.030637	0.338872
1699	X	3719567	3719832	peak_33403_Young	FBgn0086899	tlk	0.212602	0.0305898	0.338872
1170	2R	17737111	17737370	peak_11772_Young	FBgn0034269	CG6406	-0.474887	0.0306625	0.338908
1350	2L	20725084	20725612	peak_6689_Old	FBgn0032878	CG9316	0.32164	0.0306902	0.338969
1294	2L	22120984	22121261	peak_7124_Young	FBgn0032974	CG3651	0.36814	0.0307376	0.339002
1840	2L	1421042	1421300	peak_707_Young	FBgn0002543	lea	0.20912	0.0307311	0.339002
1151	3L	20808200	20808449	peak_21249_Old	FBgn0037027	HIPP1	0.526168	0.0309616	0.339999
1185	X	13667339	13667621	peak_36250_Young	FBgn0030507	CG11164	0.481557	0.0309347	0.339999
1293	3L	17421008	17421310	peak_20124_Young	FBgn0027660	blot	-0.390053	0.0309545	0.339999
1443	X	5751839	5752088	peak_33938_Young	FBgn0029799	CG15772	-0.3091	0.0309273	0.339999
1622	2L	3018229	3018488	peak_1222_Young	FBgn0031490	CG17264	0.231382	0.0308734	0.339999
1816	X	6868043	6868324	peak_34308_Young	FBgn0029915	CG14434	-0.25219	0.0308633	0.339999
1317	3R	4531997	4532270	peak_22635_Young	FBgn0051526	CG31526	0.405709	0.0310443	0.340531
1499	2R	8797496	8797752	peak_8821_Young	FBgn0024189	sns	-0.281247	0.0310705	0.340531
1570	X	9163124	9163586	peak_34929_Young	FBgn0026206	mei-P26	0.261122	0.0310771	0.340531
1583	X	2585846	2586100	peak_33041_Young	FBgn0040066	wds	0.257374	0.031121	0.340768
1707	X	19309541	19309808	peak_38044_Young	FBgn0031012	CG8051	0.234936	0.0312076	0.341471
1702	3L	9360195	9360662	peak_17653_Young	FBgn0085484	Pdxk	0.209632	0.0312523	0.341716
1571	3R	7793069	7793334	peak_23789_Young	FBgn0037518	CG2641	-0.294095	0.0313052	0.341805
1715	2R	19456927	19457196	peak_12315_Young	FBgn0002716	mei-W68	-0.208894	0.0312863	0.341805
1535	3L	7867419	7867682	peak_17168_Young	FBgn0016694	Pdp1	-0.305127	0.031328	0.341809
1717	X	21117002	21117493	peak_38630_Young	FBgn0031161	CG15445	-0.229162	0.0314267	0.342641
1296	2L	19440795	19441071	peak_6333_Young	FBgn0003346	RanGAP	-0.364145	0.0314591	0.342749
1145	2R	17248792	17249041	peak_11597_VeryOld	FBgn0046294	CG12699	0.548627	0.0315052	0.342806
1597	2R	22415157	22415651	peak_13381_Young	FBgn0022985	qkr58E-2	0.235586	0.0315092	0.342806
1196	2R	21798819	21799123	peak_13127_Young	FBgn0042098	CG18735	0.48334	0.0316152	0.343714
1336	3R	23142610	23142859	peak_28492_VeryOld	FBgn0004644	hh	0.385494	0.0316677	0.343855
1402	3R	11157203	11157452	peak_24823_Mid	FBgn0040259	Ugt86Da	0.298069	0.0316732	0.343855
1334	2R	7789026	7789287	peak_8417_Young	FBgn0033221	CG12825	-0.370656	0.0317324	0.344252
1763	3L	9854085	9854374	peak_17846_Young	FBgn0004390	RasGAP1	-0.213198	0.0318072	0.344819
1538	2R	15380547	15380808	peak_10975_Young	FBgn0000996	dup	-0.273322	0.0318981	0.345559
1615	X	14247515	14247769	peak_36439_Young	FBgn0002873	mud	-0.269673	0.0320083	0.346507
1210	3L	21496466	21496715	peak_21516_Old	FBgn0015239	Hr78	0.440297	0.032164	0.346895
1259	3L	2322519	2322868	peak_15429_Old	FBgn0035331	MsR1	0.391782	0.0321246	0.346895
1344	3R	12704962	12705430	peak_25306_Mid	FBgn0038080	CG12279	-0.337318	0.0321461	0.346895
1353	2R	16571661	16571918	peak_11381_Mid	FBgn0034139	CG4927	0.32562	0.0322569	0.346895
1392	2L	6252785	6253052	peak_2299_Young	FBgn0053531	Ddr	-0.347261	0.0321249	0.346895
1411	2L	5055698	5055960	peak_1866_Young	FBgn0014857	His3.3A	0.304877	0.032234	0.346895
1412	2L	11269585	11269842	peak_3912_Young	FBgn0040233	cana	-0.330731	0.032221	0.346895
1497	3L	16495207	16495466	peak_19813_Young	FBgn0260388	CG42514	-0.273945	0.0320911	0.346895
1505	2R	21613807	21614252	peak_13064_Young	FBgn0034639	CG15673	0.289621	0.0322714	0.346895
1790	2L	13165392	13165649	peak_4392_Young	FBgn0024291	Sir2	0.221364	0.0322035	0.346895
1314	3L	7916263	7916520	peak_17181_VeryOld	FBgn0035825	CG8111	0.378215	0.0324352	0.347498
1432	2R	23551717	23551968	peak_13826_Young	FBgn0010501	Dcp-1	-0.368274	0.032396	0.347498
1523	3L	9801546	9802365	peak_17824_Young	FBgn0044050	Ilp3	0.314978	0.0324015	0.347498
1794	2L	1077708	1077961	peak_568_Young	FBgn0015905	ast	0.209964	0.0324413	0.347498
1945	X	9868667	9868922	peak_35144_Young	FBgn0266430	CG45060	0.1918	0.0324234	0.347498
1199	2L	6740930	6741179	peak_2470_Old	FBgn0031855	CG11221	0.461248	0.032567	0.347987
1586	3L	1795226	1795484	peak_15245_Young	FBgn0011573	Cdc37	0.250989	0.0325782	0.347987
1666	3R	23757565	23758088	peak_28698_Young	FBgn0039111	Plip	0.246234	0.0325238	0.347987
1687	2R	20355014	20355272	peak_12641_Young	FBgn0034507	CG11192	0.237772	0.0325748	0.347987
1430	3L	9447601	9447881	peak_17695_Young	FBgn0035995	CG3529	-0.343095	0.0327745	0.349311
1460	3L	19464671	19465242	peak_20765_Young	FBgn0036870	CG14095	0.370566	0.0327628	0.349311
1634	3L	14550904	14551162	peak_19185_Young	FBgn0036428	Gbs-70E	-0.271241	0.0327552	0.349311
1780	X	12905714	12906211	peak_36054_Young	FBgn0030433	mRpL49	-0.208491	0.0327937	0.349311
1261	3R	11173225	11173474	peak_24825_Old	FBgn0026315	Ugt35a	0.438756	0.032886	0.35005
1568	3R	13400720	13400982	peak_25482_Young	FBgn0038149	GILT1	-0.266669	0.0329506	0.350191
1703	3R	5647723	5648263	peak_23109_Young	FBgn0262125	Sec23	0.251915	0.0329283	0.350191
1803	3L	17841169	17841430	peak_20263_Young	FBgn0036759	CG5577	-0.205689	0.032968	0.350191
1333	2R	22416020	22416296	peak_13383_Old	FBgn0022985	qkr58E-2	0.360723	0.0332683	0.351181
1347	X	2873491	2873950	peak_33144_Old	FBgn0040352	CG14416	0.383255	0.033248	0.351181
1462	3R	17394993	17395246	peak_26721_Mid	FBgn0025456	CREG	0.343561	0.0330867	0.351181
1673	2R	24744159	24744413	peak_14333_Young	FBgn0050421	CG30421	0.253041	0.0331864	0.351181
1744	3R	26106815	26107120	peak_29450_Young	FBgn0051324	CG31324	-0.226515	0.0332684	0.351181
1760	X	2073374	2073634	peak_32807_Young	FBgn0025630	CG4061	0.216595	0.033202	0.351181
1774	2L	2198619	2198873	peak_964_Young	FBgn0085201	CG34172	-0.220452	0.0331948	0.351181
1786	3L	18105603	18105886	peak_20360_Young	FBgn0036774	mRpS26	-0.216858	0.0331708	0.351181
1804	2L	16534251	16534512	peak_5435_Young	FBgn0032587	CG5953	-0.232359	0.0331208	0.351181
1731	X	19652185	19652439	peak_38178_Young	FBgn0031052	CG14215	0.232897	0.033295	0.35122
1329	3L	13046848	13047103	peak_18772_Young	FBgn0036342	CG11279	-0.380974	0.0334117	0.351479
1404	2L	8481675	8481941	peak_3059_Young	FBgn0264340	CG43796	0.3417	0.0333581	0.351479
1539	X	16633031	16633312	peak_37139_Young	FBgn0030764	CG9777	-0.317479	0.0334011	0.351479
1631	2L	7811807	7812069	peak_2806_Young	FBgn0261800	LanB1	-0.250948	0.0333891	0.351479
1773	2R	7885970	7886244	peak_8449_Young	FBgn0085390	Dgk	-0.219238	0.033486	0.352018
1419	3R	16273772	16274025	peak_26432_Young	FBgn0261286	Mat89Ba	0.326067	0.0335526	0.352233
1812	3L	14177900	14178173	peak_19083_Young	FBgn0000411	D	-0.231691	0.0335407	0.352233
1415	3R	20622561	20622828	peak_27689_Young	FBgn0001169	H	-0.362811	0.0337056	0.353596
1178	2R	11356267	11356516	peak_9722_Old	FBgn0010358	deltaTry	0.530732	0.033871	0.353634
1184	3L	7726707	7726956	peak_17118_Mid	FBgn0035812	CG7457	-0.56216	0.0339409	0.353634
1203	2L	14784325	14784574	peak_4963_Old	FBgn0032551	CG18636	0.517442	0.0337766	0.353634
1228	2R	23688373	23688622	peak_13878_Old	FBgn0262728	Pal2	0.46097	0.0338054	0.353634
1279	2R	12572489	12572765	peak_10081_Old	FBgn0033755	ClC-b	0.391821	0.033901	0.353634
1376	3L	897876	898328	peak_14921_Young	FBgn0054057	CG34057	0.362741	0.0339357	0.353634
1428	3L	7915325	7915580	peak_17179_Young	FBgn0035825	CG8111	0.312907	0.0338764	0.353634
1656	X	14787994	14788252	peak_36549_Young	FBgn0015010	Ag5r	0.264476	0.033828	0.353634
1758	2R	13602505	13602769	peak_10398_Young	FBgn0262360	CG43058	-0.228075	0.0338694	0.353634
1801	2R	11528232	11528497	peak_9775_Young	FBgn0000577	en	-0.210393	0.0338744	0.353634
1821	X	12654229	12654498	peak_35977_Young	FBgn0015024	CkIalpha	-0.231958	0.0339942	0.353948
1331	X	17206795	17207102	peak_37335_Young	FBgn0052563	CG32563	0.399969	0.0340735	0.354532
1463	3R	10849248	10849512	peak_24752_Young	FBgn0259740	CG42394	-0.361631	0.0341079	0.354648
1211	X	8100942	8101191	peak_34628_Old	FBgn0029997	CG2258	0.501036	0.0341353	0.354691
1226	X	143149	143398	peak_31970_Old	FBgn0029128	tyn	0.468488	0.0342663	0.355155
1307	3L	6082698	6082985	peak_16612_Mid	FBgn0035677	CG13293	0.450823	0.0342684	0.355155
1354	3R	29318880	29319225	peak_30554_VeryOld	FBgn0015622	Cnx99A	-0.402933	0.034208	0.355155
1508	3L	8978778	8979047	peak_17569_Young	FBgn0035948	CG5644	-0.313186	0.034273	0.355155
1273	X	2808162	2808425	peak_33128_Young	FBgn0040356	CG12498	0.424249	0.0343329	0.355293
1646	X	2061301	2061551	peak_32803_Young	FBgn0025625	Sik2	0.29398	0.0343195	0.355293
1227	3R	5632532	5632781	peak_23100_VeryOld	FBgn0037354	CG12171	0.479852	0.0343657	0.355392
1614	X	20165840	20166099	peak_38356_Young	FBgn0031092	CG9577	-0.282011	0.0344159	0.35567
1751	3L	5655765	5656037	peak_16487_Young	FBgn0085447	sif	-0.226848	0.0344743	0.356032
1275	3R	10055606	10055940	peak_24534_Old	FBgn0037782	Npc2d	0.415851	0.034516	0.35604
1655	3R	30695756	30696719	peak_31033_Young	FBgn0000274	Pka-C2	0.29186	0.0345217	0.35604
1212	3L	20635098	20635347	peak_21189_Old	FBgn0037014	CG13251	0.497563	0.0346406	0.356784
1729	X	2917836	2918140	peak_33160_Young	FBgn0025643	CG3588	-0.257213	0.0346249	0.356784
1299	2R	16945653	16945953	peak_11484_Old	FBgn0034168	CG15614	0.501941	0.0346767	0.356915
1297	2R	20327880	20328137	peak_12629_Young	FBgn0034504	CG8929	-0.408837	0.034728	0.35698
1454	3L	11696860	11697127	peak_18362_Young	FBgn0036194	CG11652	0.321387	0.0347494	0.35698
1490	3R	28922762	28923024	peak_30383_Young	FBgn0039616	CG11828	-0.307913	0.0347999	0.35698
1869	X	10265168	10265421	peak_35263_Young	FBgn0040942	CG12643	0.230403	0.0347853	0.35698
1958	X	19068896	19069159	peak_37933_Young	FBgn0085359	CG34330	-0.197368	0.03479	0.35698
1450	3R	7122982	7123236	peak_23599_Old	FBgn0037472	CG10098	0.331482	0.0348259	0.357007
1224	3L	21684456	21684705	peak_21601_Old	FBgn0261059	Sfp78E	0.500407	0.0349358	0.357405
1658	2L	16286068	16286317	peak_5359_Young	FBgn0040079	pkaap	-0.265612	0.0349098	0.357405
1708	3R	23048158	23048411	peak_28456_Young	FBgn0039043	CG17121	-0.23654	0.0349201	0.357405
1755	X	15139301	15139560	peak_36698_Young	FBgn0030616	RpL37a	-0.248388	0.0349584	0.357405
1677	3L	7434379	7434641	peak_17016_Young	FBgn0014011	Rac2	-0.265219	0.0352074	0.359709
1361	2L	8302836	8303102	peak_2983_Young	FBgn0032013	Scgalpha	-0.354887	0.0353973	0.360684
1544	X	5672325	5672580	peak_33903_Young	FBgn0029785	RpL35	-0.284545	0.0353479	0.360684
1584	3R	24630414	24630672	peak_28992_Young	FBgn0046685	Wsck	-0.277825	0.0353939	0.360684
1998	2L	2804724	2804989	peak_1130_Young	FBgn0031461	daw	0.19799	0.0353858	0.360684
1964	2L	21053631	21053900	peak_6848_Young	FBgn0010395	Itgbetanu	0.196248	0.035462	0.361102
1315	3L	21172406	21172656	peak_21389_Young	FBgn0021760	chb	-0.427455	0.0356145	0.361209
1338	2R	20230808	20231065	peak_12582_Young	FBgn0034484	CG11044	-0.394005	0.0355367	0.361209
1712	2R	7699104	7699359	peak_8380_Young	FBgn0050493	CG30493	0.23798	0.035603	0.361209
1736	X	2061820	2062102	peak_32804_Young	FBgn0025625	Sik2	0.250754	0.0355415	0.361209
1753	2R	17568352	17568612	peak_11717_Young	FBgn0034243	Ns2	0.244361	0.035579	0.361209
1797	3R	24105689	24105943	peak_28824_Young	FBgn0013343	Syx1A	0.217879	0.0355565	0.361209
1223	2R	23606223	23606472	peak_13854_Young	FBgn0034884	CG17662	0.516941	0.0357672	0.361416
1244	2L	13230245	13230494	peak_4417_Old	FBgn0032491	CG16815	0.505548	0.0357153	0.361416
1304	2R	14202403	14202714	peak_10597_Young	FBgn0033911	VGAT	0.424719	0.0358007	0.361416
1466	2L	15764073	15764329	peak_5237_Young	FBgn0028507	CG3793	-0.315225	0.0357742	0.361416
1624	3R	29691828	29692589	peak_30640_Mid	FBgn0039683	dmrt99B	0.31373	0.035753	0.361416
1627	3R	25882138	25882641	peak_29386_Young	FBgn0039381	SppL	-0.299329	0.0357845	0.361416
1720	3L	1576499	1576751	peak_15159_Young	FBgn0035237	CG13917	0.241248	0.0357854	0.361416
1844	2R	9603542	9603805	peak_9146_Young	FBgn0050339	CG30339	-0.230153	0.0359163	0.362344
1241	3L	20205611	20205864	peak_21016_Young	FBgn0036950	CG6996	0.539752	0.035948	0.362424
1269	3L	20638138	20638410	peak_21191_Old	FBgn0037014	CG13251	0.44237	0.0360453	0.363166
1260	2R	21250482	21250731	peak_12929_Mid	FBgn0034606	ASPP	-0.468316	0.0361297	0.363337
1295	2L	1368784	1369057	peak_681_Young	FBgn0031337	CG14346	0.397328	0.0361338	0.363337
1449	2L	10696835	10697370	peak_3756_Young	FBgn0032286	CG7300	0.357967	0.0360958	0.363337
1373	3R	31977936	31978200	peak_31552_Young	FBgn0039886	CG2003	-0.37984	0.0362482	0.364008
1915	2L	9568385	9568642	peak_3401_Young	FBgn0032130	CG3838	-0.207859	0.036243	0.364008
1670	2L	16816292	16816791	peak_5541_Young	FBgn0004797	mdy	-0.261182	0.0362787	0.364075
1277	X	10070404	10070681	peak_35201_Old	FBgn0030174	CG15312	0.455226	0.0363256	0.36428
1639	3L	9511433	9511687	peak_17729_Young	FBgn0010408	RpS9	-0.259394	0.0363896	0.36428
1685	3L	2642032	2642844	peak_15546_Mid	FBgn0035358	CG14949	0.28411	0.0363946	0.36428
1716	X	5907960	5908212	peak_33989_Young	FBgn0029822	CG12236	0.250764	0.0363916	0.36428
1310	3L	15687219	15687468	peak_19533_Young	FBgn0085481	CG34452	-0.445919	0.0365753	0.364693
1442	3L	8602489	8602893	peak_17436_Old	FBgn0035914	CG6282	0.385591	0.0365908	0.364693
1531	3R	10213330	10213596	peak_24584_Young	FBgn0025879	Timp	0.312079	0.0365869	0.364693
1537	2R	23697996	23698251	peak_13883_Young	FBgn0034893	mRpL43	0.287538	0.0366031	0.364693
1674	3R	24876043	24876481	peak_29068_Young	FBgn0039241	CG11089	-0.254257	0.0364699	0.364693
1829	2L	3803830	3804089	peak_1490_Young	FBgn0021800	Reph	-0.235246	0.0365215	0.364693
1991	X	18276178	18276446	peak_37653_Young	FBgn0053542	upd3	-0.230309	0.0365253	0.364693
1291	3L	20211082	20211387	peak_21020_Old	FBgn0036951	CG7017	0.495628	0.0367366	0.365784
1517	3R	10144965	10145231	peak_24569_VeryOld	FBgn0086359	Invadolysin	0.299102	0.0367659	0.365837
1243	2R	16599567	16599816	peak_11391_Old	FBgn0034144	CG5089	0.488771	0.0369921	0.366111
1245	3R	11500093	11500342	peak_24920_Old	FBgn0037908	dpr5	0.490185	0.0370093	0.366111
1349	3L	9682949	9683276	peak_17768_Young	FBgn0036029	CG16719	0.412464	0.0368671	0.366111
1426	2R	16357850	16358156	peak_11319_Young	FBgn0034121	CG6262	0.356226	0.0369955	0.366111
1485	2L	2217483	2217749	peak_974_Young	FBgn0031399	mio	-0.340702	0.0369253	0.366111
1512	3R	26862743	26863014	peak_29674_Young	FBgn0051072	Lerp	-0.29285	0.03698	0.366111
1855	3L	4133913	4134422	peak_16060_Young	FBgn0264693	ens	-0.225662	0.036906	0.366111
1911	2L	17450294	17450569	peak_5696_Young	FBgn0260632	dl	-0.213099	0.0368845	0.366111
1926	3R	20830456	20830714	peak_27760_Young	FBgn0051223	CG31223	0.211187	0.0369641	0.366111
1813	2R	9875114	9875375	peak_9233_Young	FBgn0011241	cbx	-0.250938	0.0370544	0.36632
1726	2R	11890322	11890582	peak_9911_Young	FBgn0033663	ERp60	-0.24738	0.037096	0.366361
1839	2L	21262817	21263074	peak_6922_Young	FBgn0032938	CG8671	0.221583	0.0371066	0.366361
1663	2L	17383681	17383932	peak_5664_Young	FBgn0020503	CLIP-190	-0.272564	0.0371591	0.366642
1719	3L	12434494	12434746	peak_18595_Young	FBgn0036285	toe	-0.296932	0.0371932	0.366742
1278	2R	9881458	9881707	peak_9236_Young	FBgn0033460	Sec24AB	-0.483935	0.0373106	0.367425
1733	X	2124262	2124511	peak_32832_Young	FBgn0004860	ph-d	0.239361	0.0373017	0.367425
1771	3R	27112144	27112395	peak_29777_Young	FBgn0039487	gb	0.234224	0.0373483	0.367559
1246	3L	6351461	6351710	peak_16709_VeryOld	FBgn0035699	CG13300	0.531014	0.0375037	0.368209
1825	3R	5251064	5251328	peak_22943_Young	FBgn0037304	CG1113	0.244929	0.0375219	0.368209
1849	X	7292968	7293235	peak_34397_Young	FBgn0025549	unc-119	-0.239114	0.0375349	0.368209
1864	3R	19164047	19164337	peak_27239_Young	FBgn0259704	CG42358	-0.255993	0.0375293	0.368209
2035	X	1379698	1379969	peak_32474_Young	FBgn0052813	CG32813	0.206704	0.0375096	0.368209
2089	3R	13364259	13364522	peak_25468_Young	FBgn0027610	Dic1	-0.197987	0.0375594	0.368213
1694	2R	13449870	13450138	peak_10340_Young	FBgn0086757	cbs	0.275558	0.0376798	0.368919
1808	3L	15507555	15507815	peak_19460_Young	FBgn0001099	gdl	-0.225335	0.0376633	0.368919
1367	X	1460982	1461231	peak_32527_Old	FBgn0027793	CG14787	0.397808	0.0377532	0.369164
2009	2L	21309862	21310116	peak_6938_Young	FBgn0000370	crc	0.19678	0.0377502	0.369164
1445	3L	21636634	21636995	peak_21577_Young	FBgn0043783	CG32444	-0.371479	0.0378351	0.369728
1375	3R	16995949	16996204	peak_26598_Young	FBgn0038463	CG3534	-0.361312	0.0379327	0.370208
1500	3R	14480899	14481159	peak_25808_Young	FBgn0086901	cv-c	-0.34049	0.0379304	0.370208
1252	X	8082420	8082669	peak_34621_Young	FBgn0029994	CG2254	-0.485545	0.037981	0.370251
1434	2L	18114058	18114369	peak_5843_Young	FBgn0032665	CG15152	-0.347318	0.0380107	0.370251
1881	2R	9712617	9712869	peak_9175_Young	FBgn0010316	dap	-0.217408	0.0380341	0.370251
2023	X	15633459	15633717	peak_36846_Young	FBgn0003463	sog	-0.228212	0.0380046	0.370251
1262	3L	1256421	1256670	peak_15047_Old	FBgn0035199	CG9134	0.49177	0.038117	0.370518
1284	2L	13978300	13978549	peak_4656_Old	FBgn0028939	NimC2	0.453067	0.0381158	0.370518
1981	X	2588364	2588873	peak_33042_Young	FBgn0001404	egh	0.209424	0.0381344	0.370518
1885	2R	14899041	14899309	peak_10816_Young	FBgn0033982	Cyp317a1	0.222069	0.038302	0.37191
1418	2L	7398629	7398906	peak_2679_Young	FBgn0031906	CG5160	-0.446441	0.0383436	0.372076
1238	3R	12458676	12458925	peak_25237_Young	FBgn0038057	CG12267	-0.616556	0.0386646	0.372167
1276	2R	8357293	8357542	peak_8645_Old	FBgn0033283	CG11635	0.469687	0.038699	0.372167
1335	2L	10270156	10270431	peak_3607_Young	FBgn0260750	Mulk	0.44748	0.0383922	0.372167
1513	2L	3449847	3450166	peak_1359_Young	FBgn0031534	Snx1	-0.351042	0.0385143	0.372167
1533	2L	12207638	12207894	peak_4146_Young	FBgn0051759	CG31759	-0.328952	0.0385262	0.372167
1590	2L	3662405	3662660	peak_1437_Young	FBgn0085369	CG34340	-0.289354	0.0384512	0.372167
1591	X	8490364	8490624	peak_34743_Mid	FBgn0003023	otu	0.306391	0.0387187	0.372167
1676	2L	18091482	18092200	peak_5836_Young	FBgn0032663	CG15153	0.330663	0.0386133	0.372167
1714	X	9201214	9201464	peak_34940_Young	FBgn0086450	su(r)	-0.264786	0.0386397	0.372167
1805	X	10763282	10763561	peak_35450_Young	FBgn0052675	Tango5	-0.328933	0.038626	0.372167
1857	3R	30888664	30888916	peak_31100_Young	FBgn0000416	Sap-r	-0.233316	0.0387059	0.372167
1886	2R	7782509	7782772	peak_8413_Young	FBgn0050497	CG30497	0.222027	0.038689	0.372167
1941	X	12658930	12659191	peak_35978_Young	FBgn0011837	Tis11	0.211522	0.0386223	0.372167
1954	3R	23723284	23723557	peak_28681_Young	FBgn0039109	CG10365	-0.222175	0.038509	0.372167
1984	3L	9349396	9349686	peak_17649_Young	FBgn0035977	PGRP-LF	0.196741	0.0384613	0.372167
1452	3L	21843386	21843675	peak_21673_Young	FBgn0037139	CG14563	-0.360258	0.0387832	0.372319
1532	2L	17451910	17452201	peak_5698_VeryOld	FBgn0260632	dl	0.376513	0.038772	0.372319
1420	3R	19598986	19599289	peak_27356_Young	FBgn0038715	CG7333	0.390314	0.0388091	0.372334
1543	3R	6109762	6110275	peak_23289_Old	FBgn0046876	Obp83ef	0.354983	0.0388705	0.372688
1920	X	18789062	18789316	peak_37831_Young	FBgn0004462	Pk17E	0.222815	0.0389339	0.373062
1820	3R	15292691	15292953	peak_26039_Young	FBgn0266745	CG45218	-0.235901	0.0389893	0.373124
1934	3L	15535195	15535449	peak_19475_Young	FBgn0004396	CrebA	-0.236165	0.0389701	0.373124
1650	X	16695700	16695958	peak_37173_Young	FBgn0030778	CG4678	0.292028	0.0390267	0.373248
1741	X	12464028	12464297	peak_35919_Young	FBgn0259143	CG42258	-0.290559	0.0390677	0.373406
1280	3R	17035940	17036189	peak_26617_Old	FBgn0038469	CG4009	0.507267	0.0393503	0.374436
1319	3L	16301549	16301798	peak_19737_Old	FBgn0036598	CG4982	0.49689	0.0392602	0.374436
1401	3L	10090825	10091074	peak_17893_Old	FBgn0036066	CG14160	0.384471	0.0392739	0.374436
1405	3L	22788509	22788842	peak_22106_Old	FBgn0037191	CG14448	0.388957	0.0392806	0.374436
1545	X	295146	295406	peak_32007_Young	FBgn0040370	CG13375	0.303346	0.0393695	0.374436
1860	3R	11650582	11650834	peak_24967_Young	FBgn0037926	Elp1	0.238078	0.0393465	0.374436
2002	3R	30046311	30047030	peak_30784_Young	FBgn0039741	CG7943	0.204748	0.0392464	0.374436
2184	2R	7159014	7159277	peak_8142_Young	FBgn0002930	nec	0.202121	0.0393717	0.374436
1569	2R	24186827	24187098	peak_14092_Mid	FBgn0266083	ocm	0.31647	0.0395964	0.376338
1283	2R	21675375	21675624	peak_13088_Old	FBgn0050263	stum	0.466871	0.0396392	0.376511
1891	2L	12003971	12004243	peak_4083_Young	FBgn0032394	CG6746	-0.22264	0.0398217	0.378009
1306	2L	13541729	13541978	peak_4515_Old	FBgn0028941	CG16853	0.481917	0.0398747	0.378277
1811	X	21053174	21053430	peak_38607_Young	FBgn0031150	bves	-0.256436	0.0399578	0.378597
1935	3R	5256894	5257146	peak_22947_Young	FBgn0264785	Hph	0.228105	0.039958	0.378597
1337	3L	3027757	3028006	peak_15676_Old	FBgn0004372	aly	0.472507	0.0400224	0.378972
1487	X	17587781	17588057	peak_37450_Young	FBgn0030846	CG12992	-0.370174	0.0400824	0.379069
1585	3R	12380569	12380878	peak_25199_Young	FBgn0010044	GstD8	-0.41013	0.0400628	0.379069
1433	3L	2553811	2554162	peak_15515_VeryOld	FBgn0010905	Spn	0.411538	0.0401425	0.3794
2084	3L	14107095	14107357	peak_19065_Young	FBgn0036411	Sox21a	0.203362	0.040167	0.3794
1990	3L	7361068	7361359	peak_16990_Young	FBgn0035771	Sec63	-0.223909	0.0402499	0.379947
1458	2R	25255725	25256012	peak_14532_Mid	FBgn0035094	CG9380	0.408173	0.0404088	0.38036
1484	3L	8314178	8314601	peak_17321_Young	FBgn0035872	CG7185	0.418836	0.0404104	0.38036
1495	X	9877285	9877548	peak_35148_Young	FBgn0030157	CG1468	-0.446724	0.0403842	0.38036
1507	3L	3165483	3165787	peak_15725_VeryOld	FBgn0052280	CG32280	0.334904	0.0404509	0.38036
1962	X	2269780	2270047	peak_32902_Young	FBgn0023528	CG2924	0.247636	0.0404574	0.38036
1999	3R	30248589	30248855	peak_30863_Young	FBgn0085328	CG34299	0.215372	0.0403698	0.38036
2062	3R	29765795	29766046	peak_30668_Young	FBgn0001297	kay	0.226471	0.040468	0.38036
1323	2R	22869349	22869598	peak_13562_Old	FBgn0034788	CG13532	0.487648	0.040541	0.380811
1949	3R	13660433	13660688	peak_25544_Young	FBgn0004587	B52	-0.213479	0.0406043	0.380936
2088	3R	31747464	31747724	peak_31427_Young	FBgn0022349	CG1910	0.1907	0.0405891	0.380936
1738	3R	8747287	8747549	peak_24091_Young	FBgn0037623	CG9801	0.257223	0.0406871	0.381011
1767	X	2122778	2123058	peak_32830_Young	FBgn0004860	ph-d	0.263628	0.0406672	0.381011
1963	3L	19908819	19909075	peak_20920_Young	FBgn0036915	Prp3	-0.250933	0.040646	0.381011
1309	3R	23698793	23699042	peak_28675_Old	FBgn0043005	prt	0.508949	0.0409453	0.381348
1320	X	16650049	16650298	peak_37149_Young	FBgn0052573	CG32573	-0.483898	0.040824	0.381348
1456	2R	19373098	19373387	peak_12272_Young	FBgn0034439	CG10062	0.387257	0.0409056	0.381348
1526	X	1407129	1407399	peak_32486_Mid	FBgn0259108	futsch	0.33799	0.0409895	0.381348
1611	3L	21476844	21477107	peak_21509_Young	FBgn0014143	croc	-0.299365	0.0407748	0.381348
1626	3R	4252283	4252773	peak_22515_Young	FBgn0037225	TwdlG	0.362945	0.0408573	0.381348
1743	2R	19782710	19783128	peak_12415_Young	FBgn0034474	Obp56g	0.289094	0.0408283	0.381348
1776	2R	7623007	7623283	peak_8341_Young	FBgn0263077	CG43340	-0.258887	0.0410079	0.381348
1955	3R	11175230	11175496	peak_24826_Young	FBgn0040252	Ugt86Dh	-0.218498	0.0410229	0.381348
1960	3R	25249201	25249969	peak_29190_Young	FBgn0039302	Nup358	-0.225188	0.040753	0.381348
1980	2R	17458267	17458524	peak_11671_Young	FBgn0028953	CG14478	-0.207445	0.040956	0.381348
2037	2L	22169044	22169300	peak_7147_Young	FBgn0032979	Clamp	0.2401	0.0409967	0.381348
1901	3R	9768183	9768509	peak_24436_Young	FBgn0037747	CG8481	0.238496	0.041112	0.381944
1483	2R	21884014	21884277	peak_13162_Young	FBgn0025573	PpN58A	-0.371108	0.0412912	0.382632
1511	3L	5751243	5751492	peak_16510_VeryOld	FBgn0016756	Ubp64E	0.36489	0.0413115	0.382632
1609	2L	6178565	6178838	peak_2262_Young	FBgn0085409	CG34380	-0.30121	0.0413144	0.382632
1645	2L	815846	816106	peak_457_Young	FBgn0031282	Pex12	0.289243	0.0412582	0.382632
1978	2L	5906973	5907224	peak_2136_Young	FBgn0043362	bchs	0.220804	0.0413615	0.382632
2087	2L	5907346	5907602	peak_2137_Young	FBgn0043362	bchs	-0.213207	0.0413477	0.382632
2155	2R	24814578	24814837	peak_14365_Young	FBgn0000157	Dll	-0.196936	0.0412391	0.382632
1471	X	14930647	14930972	peak_36613_Young	FBgn0052591	CG32591	0.378969	0.0414486	0.382956
1502	2R	15693345	15693631	peak_11073_Young	FBgn0053460	CG33460	0.34623	0.0415476	0.382956
1587	3L	5657372	5657628	peak_16488_Young	FBgn0085447	sif	-0.339641	0.0415441	0.382956
1632	X	19531092	19531581	peak_38123_Young	FBgn0031026	CG12231	0.297514	0.0415722	0.382956
1688	2R	12936164	12936426	peak_10192_Young	FBgn0033785	Sans	0.286122	0.0415089	0.382956
1859	2L	87613	87865	peak_144_Young	FBgn0002931	net	0.258205	0.0414399	0.382956
2025	3R	15409195	15409458	peak_26095_Young	FBgn0041188	Atx2	-0.217981	0.0415419	0.382956
1847	3R	23668617	23668881	peak_28657_Young	FBgn0051145	CG31145	0.253864	0.0417097	0.383759
1947	3R	5517382	5517650	peak_23044_Young	FBgn0010051	Itp-r83A	-0.234113	0.041687	0.383759
1823	3R	24319135	24319564	peak_28907_Young	FBgn0011785	BRWD3	0.257169	0.0417473	0.383874
1424	2L	19701778	19702044	peak_6414_Old	FBgn0005590	scw	0.421604	0.0419097	0.384158
1488	3R	29251535	29251794	peak_30523_Young	FBgn0263236	SP1029	-0.369036	0.041942	0.384158
1709	3L	12399236	12399495	peak_18580_Young	FBgn0052104	CG32104	-0.280123	0.0418723	0.384158
1757	2R	12045005	12045271	peak_9955_Young	FBgn0024732	Drep-1	-0.268827	0.0419635	0.384158
1798	X	19492269	19492518	peak_38097_VeryOld	FBgn0031021	CG12203	0.251007	0.041956	0.384158
1848	3R	6373491	6373748	peak_23391_Young	FBgn0260766	CG42564	0.269671	0.0419013	0.384158
1868	X	13953563	13954035	peak_36358_Young	FBgn0030536	CG11068	0.267177	0.0419795	0.384158
1924	3R	5257162	5257820	peak_22948_Old	FBgn0264785	Hph	0.223736	0.0419195	0.384158
1447	2R	4788900	4789161	peak_7460_Mid	FBgn0250830	CG12547	0.448804	0.0420344	0.38443
1403	2L	18114878	18115146	peak_5845_Young	FBgn0032665	CG15152	-0.436488	0.0421316	0.384627
1516	3L	6163201	6163537	peak_16635_Old	FBgn0035687	CG13296	0.384425	0.0421237	0.384627
2102	X	9585118	9585372	peak_35056_Young	FBgn0001186	Hex-A	0.219106	0.0421046	0.384627
1510	3L	14633117	14633366	peak_19209_Old	FBgn0041604	dlp	0.368383	0.0421845	0.384659
1752	3R	23281066	23281611	peak_28541_Mid	FBgn0025781	Cdc16	0.252351	0.0422359	0.384659
1907	2R	24445658	24446704	peak_14211_VeryOld	FBgn0035005	CG3483	0.255049	0.0422254	0.384659
1985	2L	13783946	13784432	peak_4579_Young	FBgn0028539	CG31731	-0.219345	0.0421971	0.384659
1374	3R	23933488	23933737	peak_28761_Mid	FBgn0039130	CG5854	0.417838	0.0422768	0.384802
1880	2L	14262918	14263179	peak_4753_Young	FBgn0261563	wb	0.235255	0.0423023	0.384804
1348	2L	332717	332966	peak_255_Young	FBgn0051921	CG31921	0.430642	0.0423416	0.384894
2068	2L	825792	826049	peak_461_Young	FBgn0010583	dock	0.207752	0.0423625	0.384894
1398	3R	19600705	19600954	peak_27357_Young	FBgn0038715	CG7333	0.429274	0.0424146	0.385138
1863	3R	11619033	11619292	peak_24953_Young	FBgn0037920	CG14710	0.250809	0.0425313	0.385968
1369	2L	10662301	10662550	peak_3751_Old	FBgn0051871	CG31871	0.478985	0.0427213	0.386836
1386	2R	14871250	14871499	peak_10808_Old	FBgn0013773	Cyp6a22	0.411397	0.0426996	0.386836
1496	2R	25062395	25062718	peak_14469_Young	FBgn0001148	gsb	0.401386	0.0427355	0.386836
1506	3L	356808	357098	peak_14692_Young	FBgn0040291	Roc1b	0.37596	0.0427537	0.386836
2076	2L	10756196	10756461	peak_3777_Young	FBgn0032297	CG17124	0.235529	0.0427095	0.386836
1407	3L	9411455	9411704	peak_17677_Mid	FBgn0035987	CG3689	0.415279	0.0429613	0.387726
1437	3R	11623255	11623539	peak_24956_Young	FBgn0037922	CG14711	-0.38359	0.0429592	0.387726
1565	2R	8444903	8445190	peak_8683_Old	FBgn0014469	Cyp4e2	0.333186	0.042979	0.387726
2007	2R	10099508	10099762	peak_9313_Young	FBgn0004907	14-3-3zeta	0.230629	0.0429101	0.387726
2146	2R	6214073	6214324	peak_7804_Young	FBgn0021847	l(2)k14710	0.200255	0.0429087	0.387726
1441	2L	10477826	10478076	peak_3696_Young	FBgn0032256	RluA-2	-0.387721	0.0430301	0.387803
1625	2R	17020578	17020871	peak_11512_VeryOld	FBgn0034181	CG8963	0.315213	0.0430384	0.387803
2057	3L	21204686	21204953	peak_21408_Young	FBgn0053054	CG33054	0.216254	0.0430739	0.387894
1735	3L	16284724	16285264	peak_19731_Young	FBgn0036593	CG13048	0.36766	0.0432392	0.388924
2099	2L	9947444	9947705	peak_3519_Young	FBgn0032167	CG5853	-0.24519	0.0432234	0.388924
1355	3R	31499097	31499346	peak_31325_Old	FBgn0039851	mey	0.480952	0.0432831	0.388971
1601	2R	23540028	23540469	peak_13820_Young	FBgn0000241	bw	0.343018	0.0433202	0.388971
1604	3L	3892516	3892795	peak_15976_Mid	FBgn0026592	Fie	0.359158	0.0433339	0.388971
1950	2L	11813673	11814159	peak_4040_Young	FBgn0032378	CycY	-0.281626	0.0433465	0.388971
1352	3R	13449939	13450188	peak_25494_Young	FBgn0038156	CG14372	-0.484202	0.04354	0.389476
1370	3L	9637089	9637338	peak_17754_Old	FBgn0036023	CG18179	0.449317	0.0435889	0.389476
1566	2R	15955205	15955516	peak_11158_Mid	FBgn0034054	CG8366	0.331892	0.0434727	0.389476
1593	X	10585319	10585582	peak_35381_Young	FBgn0085443	spri	-0.348046	0.0435269	0.389476
1764	3R	23927289	23927783	peak_28758_Young	FBgn0047114	CG31142	0.298635	0.0436255	0.389476
1817	X	15450440	15450707	peak_36766_Young	FBgn0014455	Ahcy13	-0.274208	0.0434836	0.389476
1966	X	395821	396076	peak_32035_Young	FBgn0004170	sc	-0.276069	0.0434726	0.389476
1968	X	13383903	13384164	peak_36190_Young	FBgn0030480	Tim9a	-0.222745	0.0436323	0.389476
1971	X	17657224	17657476	peak_37474_Young	FBgn0250788	beta-Spec	0.247485	0.0435629	0.389476
1312	X	19593039	19593288	peak_38144_Young	FBgn0031034	CG14205	-0.594662	0.0437532	0.390098
1382	3L	13385232	13385481	peak_18859_Old	FBgn0036352	CG14110	0.452896	0.0437489	0.390098
1636	X	10786268	10786517	peak_35469_Young	FBgn0003360	sesB	0.318887	0.0438272	0.390377
1953	3R	9516164	9516426	peak_24341_Young	FBgn0037702	CG8176	0.245471	0.0438355	0.390377
1414	3R	6693215	6693464	peak_23502_Old	FBgn0004780	Ccp84Ad	0.419199	0.0438744	0.390495
1879	X	15887222	15887481	peak_36942_Young	FBgn0260938	tay	-0.246318	0.0441519	0.392637
2178	2R	21102112	21102367	peak_12856_Young	FBgn0015721	ktub	-0.209704	0.0441666	0.392637
1385	3R	12166875	12167126	peak_25132_Old	FBgn0261714	Cpn	0.457734	0.044339	0.39314
1408	3R	14419135	14419384	peak_25779_Young	FBgn0085417	natalisin	0.450251	0.0443781	0.39314
1417	2R	24507830	24508079	peak_14244_Old	FBgn0035014	CG13581	0.424596	0.0445737	0.39314
1468	3R	24747784	24748087	peak_29011_Young	FBgn0003719	tld	0.440997	0.0446199	0.39314
1469	X	6769596	6769845	peak_34260_Old	FBgn0029502	COQ7	0.397472	0.0443989	0.39314
1504	2L	20265238	20265487	peak_6561_Old	FBgn0260000	CG17570	0.395902	0.0443983	0.39314
1648	2L	12172833	12173096	peak_4144_Young	FBgn0000114	aret	-0.340329	0.0445909	0.39314
1782	3R	12626958	12627216	peak_25271_Young	FBgn0038065	Snx3	-0.297482	0.0445949	0.39314
1785	2L	12974478	12974750	peak_4325_Young	FBgn0263598	Vha68-2	-0.263265	0.0444863	0.39314
1824	2L	3037392	3037652	peak_1231_Young	FBgn0031498	CG17260	0.268252	0.0445541	0.39314
1876	X	18693184	18693440	peak_37795_Young	FBgn0010383	Cyp18a1	-0.27237	0.044565	0.39314
1979	2R	18421046	18421785	peak_11972_Young	FBgn0034345	CG5174	0.229905	0.0446352	0.39314
1992	2L	3479112	3479391	peak_1372_Young	FBgn0261560	Thor	-0.2529	0.0444934	0.39314
2005	X	15853063	15853318	peak_36923_Young	FBgn0030700	CG15914	0.232348	0.0445481	0.39314
2019	2L	16287307	16287568	peak_5361_Young	FBgn0040079	pkaap	-0.234536	0.0445043	0.39314
2046	3L	7155943	7156206	peak_16939_Young	FBgn0259173	corn	-0.218082	0.0442701	0.39314
1706	2L	4971593	4971852	peak_1829_Young	FBgn0031659	CG14043	0.294986	0.0446743	0.393258
2138	X	19247189	19247445	peak_38014_Young	FBgn0031005	Hs3st-B	0.224667	0.0447203	0.393436
1509	3R	7250193	7250442	peak_23651_Old	FBgn0037492	CG10050	0.39482	0.0447899	0.393594
1802	2R	7539315	7539817	peak_8311_Young	FBgn0033192	Corin	0.267291	0.0447866	0.393594
1399	3L	17631716	17631965	peak_20208_VeryOld	FBgn0036742	CG7497	0.450193	0.0448613	0.393768
2052	3L	23338012	23338274	peak_22211_Young	FBgn0052230	CG32230	-0.235043	0.0448363	0.393768
1455	2R	17412871	17413134	peak_11650_VeryOld	FBgn0016697	Prosalpha5	0.446908	0.0450649	0.39432
1481	3R	30444071	30444339	peak_30930_Young	FBgn0039770	CG15537	0.371796	0.0449643	0.39432
1574	X	23105560	23105831	peak_39122_Young	FBgn0039946	ATbp	-0.357517	0.04507	0.39432
1779	3L	8121662	8121923	peak_17258_Young	FBgn0035838	ldbr	0.285659	0.0450269	0.39432
2021	X	496318	496567	peak_32070_VeryOld	FBgn0004648	svr	0.228057	0.045017	0.39432
2140	2R	17091571	17092007	peak_11545_Young	FBgn0034191	CG6984	0.218143	0.0450791	0.39432
1690	2R	21118185	21118450	peak_12862_Young	FBgn0034588	CG9394	-0.305958	0.0451078	0.394345
1799	X	9355830	9356083	peak_34998_Young	FBgn0026149	BCL7-like	-0.296621	0.0451737	0.394553
2242	2R	22122201	22122706	peak_13253_Young	FBgn0002715	mei-S332	0.206739	0.0451834	0.394553
1413	X	1189759	1190010	peak_32364_Old	FBgn0040359	CG11380	0.487273	0.0452834	0.394749
1698	X	10234880	10235145	peak_35251_VeryOld	FBgn0030187	Ipod	0.335858	0.0452648	0.394749
1827	2R	6178549	6178809	peak_7789_Young	FBgn0040502	CG8343	0.325562	0.0452709	0.394749
1346	X	12801496	12801745	peak_36037_Young	FBgn0030425	CG3775	-0.556565	0.0456449	0.395046
1396	3L	21672470	21672719	peak_21594_Old	FBgn0037115	CG11249	0.473688	0.0455526	0.395046
1473	3R	16625104	16625377	peak_26550_VeryOld	FBgn0262742	Fas1	0.430597	0.0454392	0.395046
1521	2L	18210550	18210850	peak_5887_Young	FBgn0051802	CG31802	0.368336	0.0453894	0.395046
1546	X	17202931	17203246	peak_37332_Young	FBgn0030824	CG5070	0.373249	0.045668	0.395046
1551	2L	19493695	19493956	peak_6358_Young	FBgn0002044	swm	-0.356875	0.0453661	0.395046
1710	2L	19121620	19121906	peak_6196_Young	FBgn0000422	Ddc	-0.358234	0.0456797	0.395046
1732	2L	13369039	13369290	peak_4456_Young	FBgn0051855	CG31855	-0.272118	0.0454227	0.395046
1795	3R	24817305	24817567	peak_29044_Young	FBgn0039229	Saf-B	0.269521	0.0456513	0.395046
1806	3R	27150077	27150326	peak_29791_VeryOld	FBgn0029155	Men-b	0.261613	0.0456532	0.395046
1883	2L	9521529	9521800	peak_3376_Young	FBgn0032123	Oatp30B	0.253918	0.045531	0.395046
2000	3L	1517986	1518243	peak_15136_Young	FBgn0011204	cue	0.257014	0.0454588	0.395046
2003	X	2624667	2625178	peak_33061_Young	FBgn0267350	PI4KIIIalpha	0.250848	0.0455425	0.395046
2234	2L	4119213	4119657	peak_1580_Young	FBgn0020376	Sr-CIII	0.240271	0.0455559	0.395046
2144	X	11350444	11350697	peak_35627_Young	FBgn0030292	CG11752	0.216962	0.0457239	0.395204
1440	X	6832118	6832367	peak_34285_Old	FBgn0029909	CG12796	0.44809	0.0457571	0.395267
1993	X	8116024	8116283	peak_34638_Young	FBgn0029999	CG1575	0.240225	0.0457881	0.395311
1421	3L	9486836	9487085	peak_17711_Old	FBgn0036005	pall	0.470652	0.0459453	0.396444
1669	2R	10032780	10033035	peak_9286_Young	FBgn0033475	CG12129	0.309965	0.0460015	0.396578
1937	3R	17534822	17535082	peak_26751_Young	FBgn0038516	P5cr-2	0.250366	0.0460128	0.396578
2016	2L	11809307	11809570	peak_4038_Young	FBgn0020309	crol	-0.24361	0.0460846	0.396784
2072	3L	22026306	22027471	peak_21742_Young	FBgn0037147	CG7140	0.249504	0.0460887	0.396784
1478	3R	4732544	4732838	peak_22705_Old	FBgn0027570	Nep2	0.475287	0.046139	0.396993
1579	3L	12336322	12336803	peak_18569_Mid	FBgn0036277	CG10418	-0.33613	0.0461984	0.397056
1728	3R	20588581	20588832	peak_27677_Young	FBgn0038810	Srp72	0.31083	0.0461806	0.397056
2469	2L	14021640	14022064	peak_4668_Young	FBgn0001967	NimC3	-0.176312	0.0462315	0.397117
1525	3R	11234614	11234913	peak_24851_VeryOld	FBgn0037885	CG17721	0.432699	0.0463884	0.398241
1873	2R	13500392	13500658	peak_10365_Young	FBgn0033845	mars	-0.302953	0.0464794	0.398286
2044	2R	18861963	18862226	peak_12121_Young	FBgn0262479	CG43069	-0.234636	0.0464272	0.398286
2129	3L	4627093	4627349	peak_16227_Young	FBgn0015805	Rpd3	-0.23193	0.0464464	0.398286
2231	2L	2037538	2037789	peak_917_Young	FBgn0003557	Su(dx)	0.196971	0.046498	0.398286
2039	2R	23714182	23714489	peak_13891_VeryOld	FBgn0034897	Sesn	0.234732	0.0465805	0.398545
2157	X	16414805	16415061	peak_37079_Young	FBgn0030748	Traf-like	-0.229301	0.0465677	0.398545
1996	3R	14742111	14742414	peak_25882_Young	FBgn0263929	jvl	-0.236456	0.0466781	0.398933
2040	3R	12370372	12370634	peak_25194_Young	FBgn0010038	GstD2	-0.231419	0.0466567	0.398933
1453	3R	16328477	16328726	peak_26453_Old	FBgn0038416	CG17930	0.465033	0.0468091	0.399619
1875	3L	3167028	3167312	peak_15726_Young	FBgn0052278	CG32278	-0.312169	0.0468107	0.399619
1651	2L	19530164	19530419	peak_6377_Young	FBgn0032801	CG10165	-0.379322	0.0468575	0.399794
1679	X	10220232	10220724	peak_35244_Young	FBgn0085437	CG34408	-0.304362	0.0469106	0.399801
1974	2R	8368995	8369801	peak_8653_Old	FBgn0033287	CG8701	0.284285	0.0468957	0.399801
1890	3R	26912758	26913013	peak_29700_Young	FBgn0004510	Ets97D	-0.27384	0.0470267	0.400567
1598	3R	5148756	5149028	peak_22889_Young	FBgn0037295	dpr16	0.38055	0.0470975	0.400946
2024	3L	22945951	22946223	peak_22167_Young	FBgn0037207	Mes2	-0.237327	0.0471361	0.401051
2210	3R	12688734	12689228	peak_25298_Young	FBgn0001296	kar	-0.205677	0.0472012	0.401381
1422	2L	4688483	4688732	peak_1764_Young	FBgn0031621	Elba3	0.524853	0.0473359	0.402303
1444	2R	12182488	12182737	peak_9978_Mid	FBgn0033693	CG13175	-0.43475	0.0473832	0.40248
1514	3R	8341226	8341564	peak_23959_Young	FBgn0004908	Arl2	-0.446002	0.0479508	0.404376
1576	3L	5153014	5153398	peak_16379_Young	FBgn0010747	Srp54k	-0.373036	0.04781	0.404376
1700	3L	183968	184261	peak_14606_Young	FBgn0083992	Mkp	0.304653	0.0476372	0.404376
1777	2R	6077188	6077701	peak_7736_Mid	FBgn0033060	CG7849	0.280461	0.0477232	0.404376
1792	X	9876413	9876708	peak_35147_Young	FBgn0030157	CG1468	-0.310615	0.047783	0.404376
1819	X	10051472	10052120	peak_35191_Young	FBgn0004045	Yp1	0.334694	0.0479019	0.404376
1896	3R	20558166	20558423	peak_27661_Young	FBgn0043457	CG5180	0.262969	0.0478613	0.404376
1986	3L	12125067	12125322	peak_18515_Young	FBgn0022959	yps	0.252372	0.0478199	0.404376
1987	2L	17497169	17497431	peak_5711_Mid	FBgn0003187	qua	0.330938	0.047812	0.404376
2020	X	19070950	19071217	peak_37935_Young	FBgn0085359	CG34330	-0.249737	0.0479153	0.404376
2127	X	279474	279730	peak_32003_Young	FBgn0024989	CG3777	0.227844	0.0479401	0.404376
2207	3R	9985684	9986195	peak_24503_Young	FBgn0037770	Art4	0.213461	0.0478679	0.404376
2337	2R	12951218	12951476	peak_10199_Young	FBgn0265186	CG44251	0.190609	0.0476809	0.404376
1431	X	17315249	17315498	peak_37370_Old	FBgn0004854	B-H2	0.51295	0.0480591	0.404619
1560	X	10052331	10052655	peak_35192_Old	FBgn0004045	Yp1	0.417701	0.0480526	0.404619
2145	2R	20672562	20672815	peak_12722_Young	FBgn0000615	exu	-0.235577	0.0480168	0.404619
1643	3R	11236128	11236389	peak_24854_Old	FBgn0037885	CG17721	0.336481	0.0481133	0.404852
1457	2R	22829534	22829783	peak_13548_Old	FBgn0050272	CG30272	0.500645	0.0481994	0.405353
1682	2R	22666655	22666904	peak_13485_VeryOld	FBgn0050273	CG30273	0.344547	0.0482687	0.405489
2238	3R	9784445	9784700	peak_24443_Young	FBgn0037754	CG8500	0.193144	0.0482632	0.405489
2066	2L	12974924	12975196	peak_4326_Young	FBgn0263598	Vha68-2	-0.251624	0.0483252	0.40574
1630	3R	19604166	19604602	peak_27359_Old	FBgn0038716	CG7342	0.426379	0.0484469	0.405925
1734	X	12631720	12631982	peak_35975_Young	FBgn0030412	Tomosyn	0.305972	0.048403	0.405925
1830	2L	16257451	16257713	peak_5344_Young	FBgn0028515	EndoGI	-0.267761	0.0484535	0.405925
2136	3R	9393627	9393889	peak_24290_Young	FBgn0000723	FER	-0.283214	0.0484365	0.405925
1438	X	5865782	5866031	peak_33964_VeryOld	FBgn0262611	CG43137	0.504093	0.048649	0.406447
1653	3R	8278253	8278674	peak_23934_Old	FBgn0010433	ato	0.354657	0.0486211	0.406447
2092	3R	6373767	6374216	peak_23392_Young	FBgn0260766	CG42564	0.217076	0.0485832	0.406447
2226	X	18516006	18516264	peak_37740_Young	FBgn0027087	Aats-his	-0.219451	0.0485606	0.406447
2256	X	18930149	18930410	peak_37895_Young	FBgn0264090	CG43759	0.229243	0.0486407	0.406447
2195	2L	8382717	8382967	peak_3017_Young	FBgn0032034	Rcd4	0.207292	0.0486832	0.40651
1530	3L	12507743	12508003	peak_18615_Young	FBgn0036294	CG10654	-0.385851	0.0488191	0.407422
2292	2R	16857158	16857424	peak_11469_Young	FBgn0026533	Dek	-0.191732	0.0488627	0.407563
1835	2R	19826768	19827060	peak_12431_VeryOld	FBgn0034476	Toll-7	0.303403	0.0489016	0.407664
1409	2R	17513403	17513652	peak_11689_Young	FBgn0034230	CG4853	-0.531944	0.0491328	0.408959
1559	2L	6100515	6100818	peak_2235_Young	FBgn0266521	stai	0.426286	0.0491177	0.408959
1637	2R	10264840	10265089	peak_9374_Young	FBgn0033502	CG12910	-0.356344	0.0491373	0.408959
1921	3L	199688	199949	peak_14615_Young	FBgn0035107	mri	0.271312	0.0492607	0.409763
1616	2L	10437406	10437684	peak_3689_Young	FBgn0027052	CHIP	-0.385764	0.0492886	0.409772
1477	3R	15319044	15319293	peak_26049_Old	FBgn0026441	ear	0.448739	0.0493203	0.409812
1887	2R	7811709	7812169	peak_8430_Young	FBgn0033226	CG1882	-0.270858	0.0494034	0.41008
2034	X	1161965	1162224	peak_32354_Young	FBgn0040368	eIF4E-7	0.255183	0.0494063	0.41008
1746	2R	23560392	23560851	peak_13833_Young	FBgn0015277	Pi3K59F	-0.324678	0.0495997	0.411238
2447	3R	19935550	19935813	peak_27501_Young	FBgn0021776	mira	0.188761	0.0495736	0.411238
2244	3R	26229198	26229454	peak_29479_Young	FBgn0039419	CG12290	0.211657	0.049677	0.411655
1756	X	9729346	9729628	peak_35120_Young	FBgn0020378	Sp1	-0.396286	0.0497681	0.411963
1766	2L	17530982	17531543	peak_5724_Old	FBgn0032648	CG15144	0.316912	0.0497614	0.411963
1696	3R	29026708	29027052	peak_30416_Mid	FBgn0039623	CG1951	0.349475	0.0498911	0.412364
1893	2L	10004575	10004862	peak_3547_Young	FBgn0043456	CG4747	-0.327932	0.0499245	0.412364
2169	2R	16856077	16856333	peak_11466_Young	FBgn0026533	Dek	0.215904	0.0498991	0.412364
2228	X	2184517	2185270	peak_32858_Young	FBgn0040899	CG17776	0.224091	0.0498671	0.412364
2355	2L	20770438	20770703	peak_6707_Young	FBgn0000251	cad	0.199568	0.0499869	0.412655
1489	3L	12129735	12129984	peak_18516_Old	FBgn0002565	Lsp2	0.462213	0.0501256	0.413108
1908	2L	19054559	19054834	peak_6172_Young	FBgn0032748	CG10492	-0.294355	0.05015	0.413108
2086	2R	21339677	21340546	peak_12963_VeryOld	FBgn0034622	CG15666	0.241902	0.0500785	0.413108
2125	2L	15038488	15039004	peak_5023_Young	FBgn0004837	Su(H)	-0.244177	0.0501364	0.413108
1874	2L	13722408	13722928	peak_4563_Young	FBgn0028847	CG9014	0.28787	0.0501846	0.41317
1721	2L	2551754	2552231	peak_1065_Old	FBgn0031431	CG3515	0.349167	0.0503055	0.413943
1494	3R	23472499	23472748	peak_28599_Old	FBgn0039078	CG4374	0.432982	0.0504165	0.41409
1589	3L	18088083	18088334	peak_20355_Young	FBgn0085282	CG34253	-0.370056	0.0503962	0.41409
1929	2L	357318	357802	peak_270_Young	FBgn0031250	Ent1	-0.26343	0.0504069	0.41409
2028	X	9553259	9553519	peak_35037_Young	FBgn0030136	RpS28b	0.24093	0.050432	0.41409
1588	2L	8780478	8780806	peak_3166_Young	FBgn0032069	CG9468	0.405007	0.0505183	0.414354
2252	3L	1568991	1569254	peak_15157_Young	FBgn0035236	CG12004	0.230857	0.0504968	0.414354
1856	3R	31812754	31813009	peak_31464_Mid	FBgn0039883	RhoGAP100F	0.312721	0.050572	0.414571
1603	2L	11172030	11172283	peak_3888_Young	FBgn0014076	Vm32E	-0.384022	0.0506802	0.41479
1705	2R	7924690	7925063	peak_8463_Young	FBgn0033233	Kdm4A	0.319111	0.0506724	0.41479
2237	3L	247723	247974	peak_14642_Young	FBgn0052476	mthl14	0.21744	0.0506346	0.41479
1818	3L	1206728	1207005	peak_15018_Young	FBgn0004425	LysB	-0.309101	0.0508065	0.415601
1534	3R	29815531	29815832	peak_30697_VeryOld	FBgn0039702	Vps16B	0.414664	0.0508564	0.415786
1822	3R	21878580	21879071	peak_28110_Young	FBgn0051465	CG31465	0.311254	0.0509212	0.416093
2079	3R	31749187	31749443	peak_31431_Mid	FBgn0261479	nero	0.249534	0.0510419	0.416856
2017	3R	7966521	7966791	peak_23842_Young	FBgn0000504	dsx	-0.296804	0.0510727	0.416884
1762	3L	8185882	8186166	peak_17283_Young	FBgn0035849	ERR	-0.366429	0.0512366	0.417905
1898	2R	24985844	24986128	peak_14436_Young	FBgn0010435	emp	0.293106	0.0512799	0.417905
2445	3L	19813280	19813539	peak_20871_Young	FBgn0036910	Cyp305a1	0.190526	0.0512718	0.417905
2133	2L	16325499	16325760	peak_5375_Young	FBgn0014092	CG4278	0.221601	0.0514369	0.418961
1596	2L	8521956	8522210	peak_3075_Young	FBgn0016122	Acer	0.385571	0.0515574	0.419591
2128	3R	17053851	17054105	peak_26625_Young	FBgn0020493	Dad	-0.22928	0.0515693	0.419591
1678	2R	7666001	7666250	peak_8362_Old	FBgn0033205	CG2064	0.373323	0.0516218	0.419795
1845	3L	16584149	16584402	peak_19833_Young	FBgn0250814	CG4169	-0.298111	0.0518239	0.421214
1501	3R	31233285	31233534	peak_31215_Old	FBgn0039832	CG15563	0.495347	0.051854	0.421235
2112	3R	18287653	18288510	peak_26960_Young	FBgn0038598	CG7131	0.269182	0.0519418	0.421275
2291	2L	23173764	23174267	peak_7236_Young	FBgn0039958	CG12567	0.21206	0.0519248	0.421275
2473	3L	12692903	12693175	peak_18669_Young	FBgn0014343	mirr	-0.212102	0.0519051	0.421275
1807	3R	21218634	21218891	peak_27897_Young	FBgn0038869	CG3353	0.296229	0.0520029	0.421547
1680	2L	3333045	3333346	peak_1333_Young	FBgn0031523	CG15408	0.355079	0.0520906	0.422034
1561	3L	14804860	14805123	peak_19266_Mid	FBgn0001120	gnu	0.477747	0.0521768	0.422508
1476	2R	21175371	21175620	peak_12901_Young	FBgn0003162	Pu	-0.488483	0.0522823	0.4226
1748	X	6079063	6079491	peak_34052_Old	FBgn0029838	CG4666	0.358047	0.0522457	0.4226
1895	2R	14962103	14962374	peak_10840_Young	FBgn0033987	ckn	0.295222	0.0523187	0.4226
1902	3L	18683237	18683729	peak_20505_Young	FBgn0036804	Sgf11	0.299585	0.0523267	0.4226
2483	2L	8740029	8740324	peak_3149_Young	FBgn0003209	raw	-0.195373	0.0523135	0.4226
1976	2R	22039388	22039707	peak_13207_Young	FBgn0085399	CG34370	-0.302376	0.0524248	0.423142
2168	X	13302769	13303024	peak_36154_Young	FBgn0266375	IP3K2	-0.276135	0.0524556	0.423142
2179	2R	21118567	21119632	peak_12863_Old	FBgn0034588	CG9394	0.277394	0.0524769	0.423142
1479	2L	8222089	8222338	peak_2959_Young	FBgn0032005	Snx6	-0.490662	0.0526235	0.423357
1657	4	1160783	1161181	peak_31918_Mid	FBgn0052017	CG32017	0.38457	0.0525544	0.423357
1667	3R	20756791	20757041	peak_27731_VeryOld	FBgn0038826	Syp	0.399446	0.0526716	0.423357
1927	3R	8317415	8317691	peak_23949_Young	FBgn0062412	Ctr1B	-0.31246	0.0526879	0.423357
2004	3L	15576441	15576974	peak_19493_Young	FBgn0036512	CG16979	0.258439	0.0525958	0.423357
2036	2R	12140493	12140982	peak_9961_Young	FBgn0026176	SkpB	0.246571	0.0525927	0.423357
2271	X	2041666	2041923	peak_32796_Young	FBgn0025632	CG4313	0.219392	0.0526977	0.423357
1528	3R	29835905	29836154	peak_30706_Old	FBgn0039705	Atg16	0.490622	0.0528372	0.423605
1668	3R	29691148	29691423	peak_30639_Young	FBgn0039683	dmrt99B	-0.365145	0.0528397	0.423605
1809	3R	16625940	16626219	peak_26551_Young	FBgn0262742	Fas1	0.318898	0.052767	0.423605
2075	2L	20733710	20734016	peak_6692_Young	FBgn0262743	Fs(2)Ket	-0.251954	0.0527968	0.423605
1540	X	4558610	4558859	peak_33667_Old	FBgn0029716	CG3546	0.470203	0.0530354	0.424062
1549	2L	13931539	13931788	peak_4634_Young	FBgn0261628	CG42711	-0.417269	0.0530952	0.424062
1621	3L	25115329	25115624	peak_22287_Young	FBgn0040020	MED21	-0.409444	0.0529268	0.424062
1838	X	5817210	5817466	peak_33961_Young	FBgn0029814	CG15765	-0.301033	0.0530405	0.424062
2074	2L	3719698	3719961	peak_1454_Young	FBgn0040104	lectin-24A	0.277351	0.0529929	0.424062
2492	3R	18397302	18397573	peak_26992_Young	FBgn0264751	CG44009	-0.19284	0.0531189	0.424062
2549	3R	21948290	21948773	peak_28133_Young	FBgn0264490	Eip93F	0.197627	0.0530714	0.424062
2606	2L	3507233	3507495	peak_1379_Young	FBgn0014396	tim	0.171931	0.0529748	0.424062
2460	3R	7086402	7086657	peak_23579_Young	FBgn0003884	alphaTub84B	0.189766	0.0532865	0.425178
2463	4	501586	501841	peak_31733_Young	FBgn0004607	zfh2	0.248789	0.0533304	0.425306
2098	X	1346357	1346612	peak_32455_Young	FBgn0024361	Tsp2A	-0.257356	0.0533897	0.425556
2167	2R	6648943	6649212	peak_7909_Young	FBgn0029131	Debcl	-0.237184	0.0534685	0.425962
1470	X	15750052	15750301	peak_36884_Young	FBgn0030683	CG8239	-0.513185	0.0535001	0.425992
1862	3R	8772273	8772804	peak_24102_Old	FBgn0085330	CG34301	0.387332	0.0536214	0.426734
1578	2L	14997462	14997724	peak_5010_Young	FBgn0086711	mol	-0.448159	0.0536901	0.426805
1724	3R	15342616	15342865	peak_26060_VeryOld	FBgn0038321	CG6218	0.369297	0.0537141	0.426805
1909	3L	9682162	9682647	peak_17767_Young	FBgn0087040	alphaTub67C	0.302061	0.0536811	0.426805
1633	3R	12364027	12364314	peak_25191_Old	FBgn0038018	Tim17a1	0.397167	0.0537627	0.426935
2096	3R	13710455	13710995	peak_25568_Young	FBgn0040076	primo-2	0.259106	0.0537865	0.426935
1563	3R	13301528	13301810	peak_25457_Old	FBgn0262844	CG43208	0.443028	0.0538313	0.427069
2078	2L	15761716	15761993	peak_5235_Young	FBgn0001987	Gli	-0.292862	0.0538769	0.427209
2465	X	22833016	22833570	peak_39000_Young	FBgn0259677	CG42346	-0.201594	0.0539585	0.427634
2513	3L	18186091	18186362	peak_20382_Young	FBgn0003997	hid	-0.209863	0.0540129	0.427843
1810	2L	21574085	21574353	peak_6966_Young	FBgn0032949	Lamp1	-0.325435	0.0540875	0.427888
1814	X	19170880	19171129	peak_37973_Old	FBgn0030989	Inx5	0.335871	0.0541192	0.427888
1866	X	17223484	17223952	peak_37340_Old	FBgn0085356	CG34327	0.342153	0.0541307	0.427888
2278	3R	5606717	5606971	peak_23087_Young	FBgn0261004	asl	0.213818	0.0540797	0.427888
2702	X	8650880	8651138	peak_34799_Young	FBgn0004102	oc	-0.191526	0.0541952	0.428176
1562	2L	1333097	1333346	peak_667_Old	FBgn0031331	CG5440	0.465436	0.0542807	0.428509
2134	3R	20988523	20988785	peak_27807_Young	FBgn0263400	CG43446	-0.317504	0.0542936	0.428509
1564	3R	16080090	16080339	peak_26335_Old	FBgn0052855	CG32855	0.442695	0.0543651	0.428631
1608	3R	6762707	6762971	peak_23525_Young	FBgn0000071	Ama	-0.456485	0.0543492	0.428631
1691	3R	4484584	4484853	peak_22617_Young	FBgn0037255	Fip1	0.356211	0.0544007	0.42869
1662	3R	17611056	17611344	peak_26767_Young	FBgn0085310	CG34281	0.427569	0.0545694	0.429278
2101	2L	13203171	13203425	peak_4404_Mid	FBgn0032482	Pect	0.25544	0.0545878	0.429278
2152	3R	31772077	31772335	peak_31442_Young	FBgn0039875	sip3	0.244144	0.0545539	0.429278
2214	3L	203619	203879	peak_14617_Young	FBgn0024945	NitFhit	0.231874	0.054508	0.429278
1649	3R	8653162	8653411	peak_24043_Young	FBgn0037603	CG11753	-0.38744	0.0546442	0.429289
1754	X	893855	894247	peak_32248_Old	FBgn0029539	CG11663	0.35178	0.0546464	0.429289
2148	2R	16011320	16011790	peak_11179_Young	FBgn0034062	CG8388	0.247061	0.0546735	0.429289
2391	3L	9477661	9477923	peak_17708_Young	FBgn0011327	Uch-L5	-0.226405	0.0547409	0.429597
2113	2R	10886650	10886902	peak_9595_Young	FBgn0050020	CG30020	-0.241117	0.0547946	0.429797
2241	X	2633818	2634072	peak_33062_Young	FBgn0003371	sgg	0.234816	0.0549543	0.430828
1619	2L	1822961	1823210	peak_836_Old	FBgn0051933	CG31933	0.4067	0.0550855	0.430971
1664	3L	21569543	21569798	peak_21548_Old	FBgn0037102	CG7172	0.392299	0.0551628	0.430971
1665	2L	16752597	16752867	peak_5512_Young	FBgn0032601	yellow-b	0.395215	0.0551702	0.430971
2158	2R	15011198	15011461	peak_10867_Young	FBgn0029082	hbs	0.266305	0.0550033	0.430971
2298	2R	10263816	10264071	peak_9373_Young	FBgn0033502	CG12910	-0.216811	0.0551292	0.430971
2356	3L	10092278	10092655	peak_17895_Young	FBgn0052053	CG32053	0.245455	0.0551358	0.430971
2443	X	2158932	2159186	peak_32848_Young	FBgn0004655	wapl	0.217367	0.0550625	0.430971
1701	2L	14809464	14809739	peak_4968_VeryOld	FBgn0053309	CG33309	0.400089	0.0552101	0.431002
2204	2R	22136805	22137077	peak_13262_Young	FBgn0000008	a	-0.253812	0.0552486	0.431002
2741	2R	8327100	8327421	peak_8631_Young	FBgn0261588	pdm3	-0.196072	0.0552588	0.431002
1548	2L	11154900	11155149	peak_3881_Young	FBgn0032350	CG6287	-0.478773	0.0554705	0.43119
1600	2R	24579256	24579505	peak_14279_Old	FBgn0020521	pio	0.430518	0.0553636	0.43119
1602	3L	20837535	20837801	peak_21262_Young	FBgn0040636	CG13255	-0.425741	0.0554883	0.43119
1865	2R	4013278	4013551	peak_7378_Young	FBgn0046706	Haspin	0.33726	0.0553311	0.43119
1912	X	20166539	20166798	peak_38357_Young	FBgn0031092	CG9577	-0.319907	0.0555089	0.43119
2417	2L	15113298	15113559	peak_5038_Young	FBgn0001978	stc	-0.211575	0.0554979	0.43119
2638	3R	30460402	30460793	peak_30940_Young	FBgn0039773	CG2224	0.189993	0.0553892	0.43119
2682	X	687694	688144	peak_32152_Young	FBgn0021764	sdk	-0.177658	0.0554066	0.43119
2489	2R	4470976	4471230	peak_7416_Young	FBgn0260798	Gprk1	0.214472	0.0556045	0.431713
1553	2R	12052289	12052538	peak_9956_Mid	FBgn0265373	CG44314	0.457312	0.0557242	0.431722
1704	3R	15264030	15264296	peak_26018_Young	FBgn0014879	Set	-0.369301	0.0556599	0.431722
2100	2R	18406762	18407019	peak_11966_Young	FBgn0063492	GstE8	-0.267124	0.0556754	0.431722
2235	3R	25680498	25680999	peak_29342_Young	FBgn0039358	CG5028	0.21697	0.0557471	0.431722
2533	2R	15676218	15676468	peak_11066_Young	FBgn0023441	fus	-0.191835	0.0557444	0.431722
1791	2R	8099006	8099259	peak_8539_Mid	FBgn0033259	CG11210	-0.35455	0.0558539	0.432096
2246	2R	13953587	13953844	peak_10503_Young	FBgn0050481	mRpL53	0.232853	0.0558803	0.432096
2423	2L	5980593	5980849	peak_2166_Young	FBgn0001942	eIF-4a	0.206582	0.05583	0.432096
2273	2R	10900762	10901036	peak_9602_Young	FBgn0033571	Rpb5	0.228819	0.0559291	0.432254
2408	X	487490	488244	peak_32066_Young	FBgn0023536	CG3156	0.194089	0.0559811	0.432437
1683	2R	8459718	8459967	peak_8689_Young	FBgn0033294	Mal-A4	-0.393134	0.056019	0.432511
1595	X	17632813	17633062	peak_37464_Young	FBgn0030853	CG5703	0.466833	0.0561874	0.433372
1737	3R	20360446	20360736	peak_27618_Old	FBgn0038790	MtnC	0.367543	0.0561767	0.433372
2514	X	1923155	1923421	peak_32744_Young	FBgn0023508	Ocrl	0.190083	0.0562455	0.433601
1638	3L	22134697	22134946	peak_21794_Mid	FBgn0037153	olf413	-0.382512	0.0563791	0.433866
1652	X	10387328	10387577	peak_35306_Young	FBgn0030196	Psf3	-0.408778	0.0564144	0.433866
1681	2R	7233935	7234227	peak_8176_Old	FBgn0026389	Or43a	0.370148	0.0563831	0.433866
2307	X	9284022	9284278	peak_34970_Young	FBgn0002576	lz	-0.223202	0.0564219	0.433866
2389	3L	19909600	19910077	peak_20922_Young	FBgn0036915	Prp3	0.212893	0.0563549	0.433866
2816	2L	15432126	15432382	peak_5142_Young	FBgn0028892	CG4161	0.199638	0.0564824	0.434112
1972	3R	26960296	26960834	peak_29727_Young	FBgn0039464	CG6330	0.326996	0.0565867	0.434696
1573	2R	6082263	6082512	peak_7740_Old	FBgn0033061	CG14590	0.487552	0.0566454	0.434927
2903	2L	15484063	15484346	peak_5165_Young	FBgn0020371	Tim17b2	0.179845	0.0566774	0.434954
1939	X	13783941	13784200	peak_36295_Young	FBgn0261244	inaE	-0.293906	0.0567933	0.435624
2336	2L	7994057	7994317	peak_2874_Young	FBgn0031969	pes	0.210015	0.056873	0.436017
1635	2L	15199941	15200190	peak_5073_Old	FBgn0028888	CG4168	0.410619	0.0569436	0.436339
1852	2R	25226384	25226645	peak_14524_Young	FBgn0001325	Kr	-0.35129	0.0570544	0.436751
2299	X	22540268	22540521	peak_38905_Young	FBgn0031194	CG17598	-0.236467	0.0570547	0.436751
2649	3R	25740404	25740670	peak_29362_Young	FBgn0051092	LpR2	-0.183694	0.0570882	0.436789
1722	3R	15316752	15317083	peak_26047_Young	FBgn0038315	CG14866	0.343809	0.0571183	0.436801
2521	2R	10192376	10192658	peak_9350_Young	FBgn0033494	KCNQ	0.2118	0.0572738	0.43777
2561	X	2685777	2686297	peak_33084_Young	FBgn0003068	per	-0.202972	0.057313	0.43785
1660	3L	3658116	3658365	peak_15898_Mid	FBgn0262544	CG43098	0.379178	0.0577897	0.43837
[truncated: 13,265 more rows]

## Sheet: Old v Young p<0.05
	seqnames	start	end	peak	annotation_name	symbol	logFC	P.Value	adj.P.Val
1	3R	11353091	11353351	peak_24875_Young	FBgn0026063	KP78b	-1.48516	2.07293e-14	3.16411e-10
2	3R	4307671	4307940	peak_22538_Young	FBgn0027930	MP1	-0.952626	2.97313e-11	1.51273e-07
3	3R	11984549	11984842	peak_25081_Young	FBgn0037974	CG12224	-1.6043	2.77566e-11	1.51273e-07
4	2L	22018874	22019126	peak_7109_Young	FBgn0028979	tio	-0.990366	2.75393e-10	1.0509e-06
5	3R	11980281	11980541	peak_25080_Young	FBgn0037973	CG18547	-1.16882	5.55892e-10	1.69703e-06
6	2L	4476967	4477251	peak_1698_Young	FBgn0011603	ine	-0.939467	8.3441e-10	2.12274e-06
7	3L	10769914	10770311	peak_18048_Young	FBgn0262890	CG43245	-1.17901	1.33784e-09	2.91725e-06
8	2L	19423419	19423683	peak_6321_Young	FBgn0032779	CG16771	-0.758952	3.69505e-09	7.05016e-06
12	3L	1882926	1883198	peak_15265_Young	FBgn0035287	CG13937	-1.41333	5.02706e-09	8.28589e-06
14	X	12031712	12031961	peak_35865_Young	FBgn0030369	Cyp318a1	-1.68013	5.42839e-09	8.28589e-06
9	2L	21656733	21656998	peak_6990_VeryOld	FBgn0032956	Cul2	1.11162	6.50452e-09	9.02591e-06
10	2L	13385094	13385602	peak_4464_Old	FBgn0032517	CG7099	0.785476	8.12167e-09	9.60295e-06
11	X	18634787	18635046	peak_37772_Young	FBgn0030941	wgn	-0.939686	8.17862e-09	9.60295e-06
13	3R	29682368	29682665	peak_30635_Young	FBgn0013972	Gycalpha99B	-0.747909	1.02669e-08	1.11938e-05
15	3L	15699810	15700086	peak_19538_Young	FBgn0041160	comm2	-0.697723	2.25721e-08	2.25089e-05
16	2L	21828356	21828618	peak_7047_Young	FBgn0003866	tsh	-0.794166	2.35943e-08	2.25089e-05
17	2R	21613012	21613274	peak_13062_Old	FBgn0034639	CG15673	0.737389	2.90067e-08	2.60446e-05
18	2L	20494486	20494754	peak_6627_Young	FBgn0054007	CG34007	-0.80211	3.2028e-08	2.71597e-05
19	X	2251481	2251962	peak_32895_Mid	FBgn0000377	crn	0.874983	5.68409e-08	4.56642e-05
20	2L	3771595	3771904	peak_1479_Young	FBgn0004893	bowl	-0.992414	6.50993e-08	4.96838e-05
21	3L	16359714	16359973	peak_19775_Young	FBgn0266417	CG45057	-0.866875	7.56746e-08	5.25044e-05
22	2L	2038907	2039171	peak_920_Young	FBgn0259230	lectin-22C	-1.06237	7.2767e-08	5.25044e-05
23	2L	14025754	14026003	peak_4672_Young	FBgn0028519	CG4500	-0.72519	1.26694e-07	8.40805e-05
24	3L	15234414	15234670	peak_19402_Young	FBgn0029114	Tollo	-0.657702	1.37817e-07	8.76517e-05
25	X	11925571	11925840	peak_35834_Young	FBgn0030357	Sclp	-0.948112	1.65041e-07	0.000100767
26	X	11925086	11925344	peak_35833_Young	FBgn0030357	Sclp	-0.764626	2.22756e-07	0.000130775
27	3L	17421383	17421646	peak_20125_Young	FBgn0027660	blot	-0.846002	2.38774e-07	0.000134987
29	3L	1882630	1882881	peak_15264_Young	FBgn0035287	CG13937	-1.02017	2.62618e-07	0.000138228
31	3L	1882079	1882357	peak_15263_Young	FBgn0035287	CG13937	-1.12986	2.56495e-07	0.000138228
32	3R	9869999	9870248	peak_24457_Young	FBgn0037766	Teh1	-1.12131	2.87733e-07	0.000146399
28	2L	20494895	20495149	peak_6628_Young	FBgn0054007	CG34007	-0.815707	3.01962e-07	0.000148682
30	3L	13939046	13939433	peak_19004_Young	FBgn0052137	CG32137	-0.752674	3.56655e-07	0.000170124
33	2L	11155640	11155902	peak_3882_Young	FBgn0032350	CG6287	-0.837536	4.55532e-07	0.000210704
34	3L	1755612	1755873	peak_15236_Young	FBgn0035268	CG8001	-0.985038	5.87057e-07	0.000256024
35	2R	20533140	20533403	peak_12677_Young	FBgn0034512	CG18067	-0.579942	5.84228e-07	0.000256024
36	2R	14964527	14964799	peak_10844_Young	FBgn0261854	aPKC	-0.617211	6.96883e-07	0.000295478
39	3L	9423159	9423408	peak_17680_Young	FBgn0023129	aay	-1.27923	7.36443e-07	0.000303813
37	X	4323930	4324193	peak_33610_Young	FBgn0040907	mRpL33	-0.708855	8.32809e-07	0.000334526
38	2L	19423932	19424190	peak_6322_Young	FBgn0032779	CG16771	-0.578411	8.67481e-07	0.000339519
40	3R	13812834	13813094	peak_25599_Young	FBgn0259730	tal-1A	-0.70546	9.22013e-07	0.000342994
41	3L	15728317	15728571	peak_19549_Young	FBgn0010105	comm	-0.62916	9.24707e-07	0.000342994
42	2L	18155895	18156160	peak_5867_Young	FBgn0032670	CG5783	-0.722137	9.43774e-07	0.000342994
43	4	396170	396441	peak_31686_Young	FBgn0262636	Lin29	-0.682595	1.18196e-06	0.000419568
44	3L	15976860	15977126	peak_19613_Young	FBgn0036551	CG17029	-0.804304	1.21277e-06	0.000420721
45	3R	19906088	19906349	peak_27482_Young	FBgn0038747	RhoGAP92B	-0.588796	1.39888e-06	0.000471254
49	2L	3771977	3772226	peak_1480_Young	FBgn0004893	bowl	-0.938828	1.42018e-06	0.000471254
46	3R	30765496	30765762	peak_31054_Young	FBgn0004606	zfh1	-0.811368	1.54378e-06	0.000480903
47	2L	13128964	13129364	peak_4384_Young	FBgn0032471	CG5122	-0.871164	1.483e-06	0.000480903
48	2R	5608878	5609196	peak_7534_VeryOld	FBgn0039970	CG17508	0.544406	1.53762e-06	0.000480903
50	3R	4810013	4810270	peak_22746_Young	FBgn0037279	CG1129	-0.856435	1.75423e-06	0.000535531
51	2L	3706954	3707214	peak_1446_Young	FBgn0051777	CG31777	0.661659	1.83796e-06	0.00055009
52	X	19665706	19665978	peak_38182_Young	FBgn0004057	Zw	-0.793585	1.92634e-06	0.000565456
53	2R	8647801	8648069	peak_8765_Young	FBgn0003892	ptc	-0.761199	2.35521e-06	0.000665741
54	3R	14108470	14108739	peak_25687_Young	FBgn0038202	CG12402	-0.661053	2.31919e-06	0.000665741
55	3R	29255734	29255999	peak_30525_Young	FBgn0267104	CG45544	-0.635681	2.67257e-06	0.000741711
56	2L	15748050	15748301	peak_5231_Young	FBgn0010382	CycE	-0.645923	2.76962e-06	0.000754918
57	3R	23386075	23386338	peak_28580_Young	FBgn0039075	CG4393	-0.617556	3.26618e-06	0.000864757
58	2R	22926374	22926634	peak_13586_Young	FBgn0010660	Nup214	-0.734381	3.28589e-06	0.000864757
62	3L	19292486	19292758	peak_20718_Young	FBgn0028380	fal	-1.02134	3.92376e-06	0.00101512
59	2L	18156211	18156470	peak_5868_Young	FBgn0032670	CG5783	-0.63506	4.2375e-06	0.00105552
60	2L	16485723	16485983	peak_5412_Young	FBgn0005677	dac	-0.680984	4.28734e-06	0.00105552
61	3L	11065884	11066139	peak_18167_Young	FBgn0025355	SuUR	-0.632096	4.24328e-06	0.00105552
63	X	1513644	1514248	peak_32554_Young	FBgn0025393	CG14795	-0.785063	4.46642e-06	0.00106524
64	2L	13290686	13290954	peak_4431_Young	FBgn0051729	CG31729	-0.564705	4.42424e-06	0.00106524
65	2R	7039895	7040168	peak_8090_Young	FBgn0053914	CG33914	-0.742089	4.77765e-06	0.00112194
66	X	6805531	6805784	peak_34278_Young	FBgn0259228	C3G	-0.911272	5.32903e-06	0.00123246
67	3R	15548151	15548411	peak_26150_Young	FBgn0038349	AOX3	-0.695657	6.82071e-06	0.0015539
68	3L	1204302	1204595	peak_15015_Young	FBgn0035189	CG9119	-0.613583	8.27215e-06	0.00185685
69	2L	827732	827994	peak_464_Young	FBgn0031286	CG3862	-0.661505	8.75158e-06	0.001936
70	3L	15729264	15729547	peak_19550_Young	FBgn0010105	comm	-0.760749	9.71761e-06	0.002119
71	X	15689754	15690008	peak_36853_VeryOld	FBgn0030667	CG15599	0.645901	1.0218e-05	0.00219672
73	2R	21250915	21251191	peak_12930_Young	FBgn0034606	ASPP	-0.515853	1.05568e-05	0.00223804
72	3R	11993248	11993511	peak_25090_Young	FBgn0260745	mfas	-0.84547	1.07432e-05	0.00224635
74	X	3176183	3176467	peak_33252_Young	FBgn0000479	dnc	-0.645051	1.17763e-05	0.00242911
76	3R	21246650	21246905	peak_27910_Young	FBgn0038874	ETHR	-0.591351	1.21624e-05	0.0024753
75	X	20690539	20690797	peak_38512_Old	FBgn0003300	run	0.659263	1.25809e-05	0.00252677
78	2L	117831	118091	peak_157_Young	FBgn0031219	CG13694	0.718176	1.33558e-05	0.00264757
77	2R	11529527	11529790	peak_9776_Young	FBgn0000577	en	-0.670407	1.3573e-05	0.00265613
79	2R	23925062	23925328	peak_13963_VeryOld	FBgn0034931	CG2812	0.785587	1.48123e-05	0.00282618
80	3R	15476334	15476629	peak_26122_Young	FBgn0038341	AdamTS-A	-0.53391	1.46417e-05	0.00282618
81	2R	7418541	7418797	peak_8250_Young	FBgn0003460	so	-0.516407	1.56382e-05	0.00294693
82	X	18832432	18832692	peak_37854_Young	FBgn0030964	Pvf1	-0.520641	1.66159e-05	0.00309298
83	3R	11353519	11353791	peak_24876_Young	FBgn0026063	KP78b	-0.469747	1.72152e-05	0.00316594
85	2L	11842174	11842708	peak_4052_Young	FBgn0040968	CG14933	-0.512056	1.91102e-05	0.0034726
84	2R	10423578	10424018	peak_9430_Young	FBgn0033520	Prx2540-1	-0.799274	1.95829e-05	0.00351663
86	3L	16091294	16091575	peak_19663_Young	FBgn0036565	CG5235	-0.724652	2.05046e-05	0.00356349
88	2R	6880856	6881112	peak_8026_Young	FBgn0033113	Spn42Dc	-0.474099	2.05442e-05	0.00356349
90	X	7607976	7608466	peak_34468_Young	FBgn0004198	ct	-0.542692	2.02693e-05	0.00356349
87	2L	3803338	3803591	peak_1489_Young	FBgn0021800	Reph	-0.573993	2.16624e-05	0.00365617
89	2L	6090389	6090654	peak_2230_Young	FBgn0266445	CG45075	-0.759337	2.17971e-05	0.00365617
91	2L	20716054	20716335	peak_6685_Young	FBgn0014859	Hr38	-0.55197	2.16167e-05	0.00365617
92	3R	26440458	26440756	peak_29529_Young	FBgn0263118	tx	-0.6823	2.47988e-05	0.0040702
93	3R	15547530	15547835	peak_26149_Young	FBgn0038349	AOX3	-0.525998	2.46311e-05	0.0040702
94	X	18083958	18084231	peak_37592_Young	FBgn0030891	dik	-0.826973	2.71001e-05	0.00440059
95	3R	17557520	17557793	peak_26760_Young	FBgn0264005	Hmx	-0.654196	2.84014e-05	0.00455711
96	3R	31777883	31778139	peak_31448_Young	FBgn0005632	faf	-0.542327	2.86611e-05	0.00455711
97	X	11442228	11442557	peak_35656_Young	FBgn0030300	Sk1	-0.482625	2.95981e-05	0.00465758
99	3R	19212834	19213229	peak_27251_Young	FBgn0025680	cry	-0.44907	3.1638e-05	0.00492779
100	X	13994992	13995265	peak_36376_Young	FBgn0000173	ben	-0.658656	3.42911e-05	0.00528706
98	2L	21148287	21148543	peak_6879_VeryOld	FBgn0086251	del	0.744431	3.52845e-05	0.0053325
101	2R	13424856	13425118	peak_10326_Young	FBgn0265272	CG30060	-0.618096	3.52533e-05	0.0053325
102	X	8806642	8806902	peak_34834_Young	FBgn0026411	Lim1	-0.597924	3.57476e-05	0.00534952
103	X	13404541	13404803	peak_36201_Young	FBgn0030484	GstT4	-0.661696	3.77622e-05	0.00556095
105	3R	14624409	14624691	peak_25833_Young	FBgn0013981	His4r	-0.518612	3.78891e-05	0.00556095
104	3R	22369016	22369269	peak_28257_Young	FBgn0038951	CG5380	-0.563058	3.91715e-05	0.00569441
106	2R	23042973	23043242	peak_13621_Young	FBgn0261705	CG42741	-0.466381	3.97908e-05	0.00572988
107	2L	13205009	13205274	peak_4407_Young	FBgn0032481	CG16972	-0.645591	4.40595e-05	0.00626735
108	3L	7131616	7131875	peak_16927_Young	FBgn0010387	Dbi	-0.605277	4.43445e-05	0.00626735
112	3R	15537253	15537520	peak_26147_Young	FBgn0267408	AOX1	-0.461301	4.55729e-05	0.00638187
113	X	7709298	7709558	peak_34509_Young	FBgn0029504	CHES-1-like	-0.520019	4.71694e-05	0.00654539
109	3R	7886629	7886891	peak_23813_Young	FBgn0037526	CG10092	0.514134	4.76225e-05	0.00654873
110	3L	1102376	1102660	peak_14978_Young	FBgn0004870	bab1	-0.581453	4.82633e-05	0.0065776
111	2R	20698292	20698547	peak_12725_Mid	FBgn0040726	dpr	0.633006	5.00066e-05	0.00675488
119	3R	4773308	4773566	peak_22723_Old	FBgn0264907	CG44098	0.87304	5.46543e-05	0.00731792
114	2R	6740631	6740891	peak_7956_Mid	FBgn0028579	phtf	0.852445	5.59173e-05	0.00740863
115	3L	20695476	20695752	peak_21203_Young	FBgn0001320	kni	-0.609286	5.68191e-05	0.00740863
116	2L	7581106	7581361	peak_2740_Young	FBgn0083141	Spn28B	-0.677923	5.75047e-05	0.00740863
117	2R	14358039	14358325	peak_10659_Old	FBgn0033925	CG8617	0.796475	5.77586e-05	0.00740863
118	3R	12960354	12960641	peak_25347_Young	FBgn0087021	Spc25	-0.608087	5.74169e-05	0.00740863
120	3R	7548299	7548555	peak_23735_Young	FBgn0015568	alpha-Est1	-0.694654	6.15387e-05	0.00782772
123	X	21067510	21067768	peak_38618_Young	FBgn0052512	CG32512	-0.563972	6.25176e-05	0.00788652
121	2R	24342611	24342882	peak_14163_Young	FBgn0004101	bs	-0.7155	6.30557e-05	0.0078892
138	3R	4236114	4236363	peak_22503_Young	FBgn0010225	Gel	-1.1585	6.43377e-05	0.00798415
122	2L	15747486	15747741	peak_5230_Young	FBgn0010382	CycE	-0.653385	6.69327e-05	0.00810842
124	2R	6811750	6812132	peak_7996_Young	FBgn0265003	koi	-0.505981	6.59929e-05	0.00810842
127	3R	31194875	31195137	peak_31194_Young	FBgn0039827	CG1544	-0.539282	6.64204e-05	0.00810842
125	X	5419655	5419944	peak_33864_Mid	FBgn0029763	CG4165	-0.608437	6.88045e-05	0.00826954
130	X	18857407	18857672	peak_37864_Young	FBgn0030969	CG7288	-0.497922	7.03873e-05	0.00832862
132	3L	13477287	13477549	peak_18899_Young	FBgn0086708	stv	-0.45766	7.03758e-05	0.00832862
126	4	625977	626254	peak_31776_Old	FBgn0039914	mav	0.723939	7.18808e-05	0.00843991
129	X	16063912	16064194	peak_36978_Old	FBgn0030723	dpr18	0.880126	7.26201e-05	0.00846163
128	2R	13546368	13546639	peak_10378_Mid	FBgn0033853	CG6145	0.607644	7.46374e-05	0.0086308
131	3R	10850497	10850835	peak_24755_Young	FBgn0037841	CG4565	-0.575009	7.76126e-05	0.00890736
133	2R	21201004	21201333	peak_12914_Young	FBgn0265180	CG44245	-0.658258	8.43305e-05	0.00958304
139	3L	1349577	1349843	peak_15080_Young	FBgn0029514	CG9166	-0.472533	8.47557e-05	0.00958304
135	4	358873	359138	peak_31669_Young	FBgn0039904	Hcf	0.546582	8.70099e-05	0.00976558
134	2L	16451044	16451318	peak_5406_Young	FBgn0020414	Idgf3	-0.790698	8.79502e-05	0.00979524
136	2L	22169365	22169622	peak_7148_Old	FBgn0032979	Clamp	0.741912	8.85576e-05	0.00979524
141	2L	480504	480774	peak_318_Old	FBgn0043364	cbt	0.434627	8.94464e-05	0.00982237
137	3R	29256372	29256663	peak_30526_Young	FBgn0267104	CG45544	-0.829965	9.0198e-05	0.00983416
149	2R	24767578	24767833	peak_14343_Young	FBgn0027590	GstE12	0.389686	9.23631e-05	0.0099988
140	3L	223678	223929	peak_14628_Young	FBgn0053229	CG33229	0.504493	9.4481e-05	0.010156
142	2R	19881109	19881382	peak_12447_Young	FBgn0034477	CG13872	-0.595421	9.79201e-05	0.0104252
143	2L	1708198	1708476	peak_801_Young	FBgn0031357	mRpL48	-0.645731	9.90344e-05	0.0104252
148	3L	17238176	17238440	peak_20079_Young	FBgn0260943	Rbp6	-0.465114	9.86011e-05	0.0104252
147	2L	1649860	1650117	peak_785_Young	FBgn0086758	chinmo	-0.524682	0.000102795	0.0107471
145	2L	18944744	18945014	peak_6124_Young	FBgn0032723	ssp3	-0.494153	0.000104661	0.0108676
144	2R	8598658	8598907	peak_8740_Young	FBgn0267792	rgr	-0.74232	0.000106306	0.0109639
150	3R	4387040	4387299	peak_22567_Mid	FBgn0003882	tub	0.623495	0.000108704	0.0111359
146	2L	16793989	16794267	peak_5535_Young	FBgn0040262	Ugt36Ba	-0.620995	0.000110923	0.0112875
151	3L	12147022	12147285	peak_18526_Young	FBgn0013997	Nrx-IV	-0.537291	0.000111686	0.0112899
153	3L	7808820	7809081	peak_17138_Young	FBgn0052369	CG32369	-0.486384	0.00011406	0.0114541
152	X	1692657	1692916	peak_32646_Mid	FBgn0029588	CG14798	0.530814	0.000116685	0.0116184
160	3R	12595822	12596122	peak_25266_Young	FBgn0038063	Octbeta2R	-0.414877	0.00011722	0.0116184
158	3L	15235383	15235635	peak_19403_Young	FBgn0029114	Tollo	-0.440131	0.000120899	0.0119059
156	3L	6789891	6790150	peak_16850_Young	FBgn0086680	vvl	-0.46629	0.000123776	0.012111
154	3L	21808039	21808359	peak_21657_Young	FBgn0000560	eg	-0.823411	0.000128457	0.0122535
155	3R	27706240	27706507	peak_29976_Young	FBgn0039544	CG12877	-0.517443	0.000129014	0.0122535
159	2R	10617483	10617740	peak_9509_Young	FBgn0033538	CG11883	-0.436717	0.000129246	0.0122535
164	2L	21899489	21899748	peak_7076_Young	FBgn0032965	CG11629	-0.479117	0.000128569	0.0122535
169	X	580607	580860	peak_32104_Young	FBgn0261930	vnd	0.338987	0.000128181	0.0122535
157	2R	24335584	24335887	peak_14161_Young	FBgn0005638	slbo	-0.719648	0.000145255	0.0135909
162	3L	3246476	3246743	peak_15758_Old	FBgn0263246	CG43389	0.582892	0.000145039	0.0135909
165	X	21045446	21045700	peak_38605_Young	FBgn0031148	Cbs	-0.520267	0.000146023	0.0135909
161	3R	11352378	11352627	peak_24874_Young	FBgn0026063	KP78b	-0.931664	0.000147441	0.0136397
167	2L	6178988	6179259	peak_2263_Young	FBgn0085409	CG34380	-0.477301	0.000148993	0.0137002
163	2L	6663792	6664049	peak_2440_VeryOld	FBgn0000392	cup	0.626714	0.000155137	0.0139295
166	4	834256	834520	peak_31844_Young	FBgn0039938	Sox102F	0.572011	0.000153175	0.0139295
172	3L	2632572	2632967	peak_15541_Young	FBgn0035357	MEP-1	-0.49775	0.000153329	0.0139295
175	X	4411445	4411705	peak_33626_Young	FBgn0000179	bi	-0.451938	0.000154949	0.0139295
171	3L	18890914	18891189	peak_20578_Young	FBgn0036821	CG3961	-0.502478	0.000162115	0.0144709
176	3R	10109206	10109459	peak_24555_Young	FBgn0028734	Fmr1	-0.436456	0.000165468	0.0146843
168	2R	25130029	25130304	peak_14500_VeryOld	FBgn0050430	CG30430	0.747076	0.000170093	0.0147993
173	2R	24616061	24616324	peak_14289_Young	FBgn0035040	CG4741	0.498646	0.000168907	0.0147993
174	X	1286226	1286496	peak_32428_Young	FBgn0025642	CG32812	0.476734	0.000170642	0.0147993
178	X	1274105	1274375	peak_32419_Young	FBgn0028550	Atf3	0.433702	0.000168401	0.0147993
170	X	19259879	19260168	peak_38019_Young	FBgn0040068	Vav	-0.838856	0.000173325	0.0149471
179	X	15448136	15448394	peak_36762_Young	FBgn0014455	Ahcy13	-0.432609	0.000178549	0.0153111
177	3L	6988905	6989164	peak_16893_Young	FBgn0045759	bin	-0.486452	0.000180996	0.0154342
180	3R	4360787	4361066	peak_22558_Young	FBgn0037238	CG1090	-0.463633	0.000182844	0.0155052
181	2L	8528966	8529226	peak_3080_Young	FBgn0028394	CG17834	-0.470908	0.000186896	0.0157612
188	X	5560532	5560788	peak_33888_Young	FBgn0263512	Vsx2	-0.422991	0.000191537	0.0160638
187	3R	22998203	22998471	peak_28446_Young	FBgn0263390	Nha2	-0.395179	0.00019719	0.0164476
182	X	11441649	11441920	peak_35655_Young	FBgn0030300	Sk1	-0.534858	0.000203813	0.0169076
185	2L	5805236	5805500	peak_2105_Young	FBgn0031741	CG11034	-0.516306	0.000212823	0.0175597
183	3R	29681390	29681653	peak_30634_Young	FBgn0013972	Gycalpha99B	-0.642601	0.000225386	0.0183444
184	2R	10042278	10042573	peak_9289_VeryOld	FBgn0085249	CG34220	0.826336	0.000225939	0.0183444
186	2L	413407	413678	peak_282_Young	FBgn0263933	ebi	-0.642555	0.00022425	0.0183444
192	3L	15691638	15691896	peak_19536_Young	FBgn0085480	CG34451	-0.439362	0.000239275	0.0193243
190	2L	7701956	7702250	peak_2781_Mid	FBgn0041181	Tep3	0.55453	0.000248107	0.0199321
189	3R	6210181	6210450	peak_23327_Young	FBgn0037410	Osi2	-0.69332	0.000254627	0.0203488
191	3R	31038359	31038633	peak_31146_Young	FBgn0010015	CanA1	-0.663515	0.000265146	0.0210791
203	X	579861	580159	peak_32103_Young	FBgn0261930	vnd	0.340362	0.000271418	0.0214659
193	X	6804626	6804875	peak_34277_Young	FBgn0029903	pod1	-0.68234	0.000279689	0.022006
196	2L	412807	413078	peak_281_Young	FBgn0263933	ebi	-0.602409	0.000282651	0.0221251
194	2L	16716443	16716717	peak_5493_Young	FBgn0086907	Cyt-c-d	-0.566389	0.00028997	0.0225822
215	3R	26006046	26006717	peak_29419_Young	FBgn0002733	E(spl)mbeta-HLH	0.278427	0.000291576	0.0225919
197	2L	1944585	1944860	peak_874_Mid	FBgn0040719	CG15357	0.585244	0.000299724	0.023106
195	3R	3734065	3734324	peak_22447_Mid	FBgn0263977	Tim17b	0.885415	0.000304622	0.0233656
201	X	8709488	8709764	peak_34816_Young	FBgn0041629	Hexo2	-0.452826	0.000309876	0.0236498
198	3R	27698844	27699112	peak_29969_Young	FBgn0045862	btz	-0.530463	0.000323991	0.0244513
202	3R	27946790	27947073	peak_30039_Young	FBgn0039562	Gp93	-0.547401	0.000325185	0.0244513
206	2R	1590402	1590671	peak_7316_Young	FBgn0039993	CG17691	-0.446926	0.000324951	0.0244513
208	X	19850931	19851192	peak_38257_Young	FBgn0031078	Nup205	-0.436891	0.000328113	0.0245506
210	3R	6351759	6352024	peak_23383_Young	FBgn0267698	Pak	-0.408837	0.00034356	0.025581
199	3R	13450229	13450532	peak_25495_Young	FBgn0038156	CG14372	-0.74984	0.000350056	0.0259382
200	3R	26798192	26798443	peak_29657_Young	FBgn0262473	Tl	-0.582291	0.000351992	0.0259556
207	X	9284297	9284555	peak_34971_Young	FBgn0002576	lz	-0.466167	0.00035849	0.0261958
213	3L	224025	224278	peak_14629_Young	FBgn0053229	CG33229	0.369228	0.000358682	0.0261958
204	3R	22528018	22528297	peak_28308_Young	FBgn0038981	CG5346	-0.53691	0.000370403	0.0268034
205	2L	16791350	16791631	peak_5534_Young	FBgn0032603	CG17928	-0.547083	0.000370514	0.0268034
214	3R	20564009	20564271	peak_27664_Young	FBgn0038804	CG10877	0.432897	0.000376029	0.0270741
209	3L	6162795	6163044	peak_16634_Old	FBgn0035687	CG13296	0.870836	0.000380822	0.0272905
220	3L	184275	184781	peak_14607_Young	FBgn0083992	Mkp	0.41643	0.000384584	0.0274313
211	3R	13611124	13611373	peak_25526_Old	FBgn0038160	CG9759	0.954829	0.000390096	0.027695
219	3R	18394922	18395180	peak_26989_Young	FBgn0264751	CG44009	-0.45148	0.000407651	0.0288073
212	3L	1202783	1203090	peak_15012_Young	FBgn0063667	CG32335	-0.52834	0.000423811	0.0298113
224	3L	12468078	12468340	peak_18599_Young	FBgn0000625	eyg	-0.414806	0.000428196	0.0299816
218	X	21629497	21629755	peak_38808_Young	FBgn0024807	DIP1	-0.455134	0.000437467	0.0304909
227	2L	11445598	11445869	peak_3957_Young	FBgn0261648	salm	-0.469251	0.00043964	0.030503
216	4	396507	396769	peak_31687_Young	FBgn0262636	Lin29	-0.541619	0.000444319	0.0306881
229	3R	30388051	30388337	peak_30914_Old	FBgn0015221	Fer2LCH	0.375816	0.000451561	0.0310479
217	2R	10428402	10428659	peak_9433_Young	FBgn0262114	RanBPM	-0.73962	0.000465676	0.0318748
223	2L	20091093	20091355	peak_6530_Young	FBgn0032846	CG10721	-0.486513	0.000477298	0.0321895
225	2L	13802250	13802527	peak_4585_Young	FBgn0027844	CAH1	-0.462621	0.000478709	0.0321895
231	2L	6494445	6494711	peak_2390_Young	FBgn0031824	CG9547	-0.399431	0.00047786	0.0321895
236	2L	131825	132082	peak_165_Young	FBgn0001142	Gs1	0.387886	0.000474503	0.0321895
221	3R	30764214	30764483	peak_31053_Young	FBgn0004606	zfh1	-0.634526	0.000501567	0.0334319
228	X	20173776	20174035	peak_38363_Young	FBgn0000084	AnxB10	-0.484352	0.000499426	0.0334319
226	2L	18114387	18114675	peak_5844_Young	FBgn0032665	CG15152	-0.539778	0.000510645	0.0338891
222	2L	10543225	10543492	peak_3720_Young	FBgn0051721	Trim9	-0.661257	0.000514105	0.033971
238	3R	30532341	30532597	peak_30972_Young	FBgn0082582	tmod	-0.472521	0.00052233	0.0342685
243	3L	16667933	16668247	peak_19873_Young	FBgn0010223	Galphaf	0.417298	0.000523097	0.0342685
239	3L	12580414	12580682	peak_18634_Young	FBgn0015904	ara	-0.419116	0.000534535	0.0348681
232	3L	4362909	4363183	peak_16128_Young	FBgn0035534	mRpS6	-0.544265	0.000536897	0.0348732
234	X	2589166	2589442	peak_33043_Young	FBgn0001404	egh	-0.475346	0.000541229	0.0350056
233	3L	6261435	6261729	peak_16668_Young	FBgn0001258	ImpL3	-0.549186	0.000555525	0.0357786
242	X	9578795	9579047	peak_35048_Young	FBgn0052699	CG32699	-0.409772	0.000562984	0.0361067
230	2R	20698565	20698830	peak_12726_Old	FBgn0040726	dpr	0.709762	0.0005687	0.0363207
235	2L	16358103	16358352	peak_5391_Young	FBgn0025678	CaBP1	-0.846549	0.000589185	0.0374456
237	2R	20236063	20236331	peak_12584_Young	FBgn0034485	CG11099	-0.499871	0.00059122	0.0374456
245	3R	14655319	14655571	peak_25847_Mid	FBgn0086686	l(3)L1231	0.418862	0.000595324	0.0375497
247	2R	20666583	20666868	peak_12717_Young	FBgn0034542	Fem-1	-0.444338	0.000604922	0.0379179
252	2L	16486052	16486314	peak_5413_Young	FBgn0032585	CG4580	-0.434069	0.00060613	0.0379179
251	2R	24813733	24813992	peak_14364_Young	FBgn0000157	Dll	-0.409523	0.000628144	0.0391347
246	2L	8703307	8703573	peak_3138_Old	FBgn0032061	CG9314	0.468942	0.000630807	0.0391408
258	X	529802	530059	peak_32088_Young	FBgn0000108	Appl	0.365104	0.000642713	0.039558
259	2L	6380689	6380960	peak_2348_Young	FBgn0031808	CG9507	0.366118	0.000642257	0.039558
240	2R	11397685	11397946	peak_9744_Young	FBgn0082585	sprt	-0.611274	0.000657678	0.0402022
241	3L	4402891	4403142	peak_16138_Old	FBgn0035540	Syx17	0.626407	0.000658448	0.0402022
244	X	126649	126909	peak_31961_Old	FBgn0025836	RhoGAP1A	0.663887	0.000673265	0.0409431
249	2R	20617733	20617996	peak_12700_Young	FBgn0034527	CG9945	0.546333	0.000679135	0.0411362
267	X	581149	581427	peak_32105_Young	FBgn0261930	vnd	0.339245	0.000682059	0.04115
248	2R	16343320	16343609	peak_11314_Young	FBgn0034118	Nup62	-0.544411	0.000698785	0.0419931
260	3R	19407732	19408003	peak_27309_Mid	FBgn0038705	CG11626	0.393683	0.000702192	0.0420324
266	X	7573168	7573438	peak_34456_Young	FBgn0029951	CG11369	-0.48928	0.000729623	0.0435038
250	3R	24389990	24390239	peak_28933_Old	FBgn0039198	CG5768	0.76402	0.000738915	0.0435439
262	X	437649	437908	peak_32046_Young	FBgn0011822	pcl	0.46067	0.000735714	0.0435439
264	3R	6791481	6791738	peak_23530_Young	FBgn0000439	Dfd	-0.451656	0.000741707	0.0435439
276	3L	12693196	12693586	peak_18670_Young	FBgn0014343	mirr	-0.387238	0.0007366	0.0435439
257	3R	14363220	14363476	peak_25757_Old	FBgn0051320	CG31320	0.494761	0.000750861	0.0439124
274	2L	21899216	21899473	peak_7075_Young	FBgn0032965	CG11629	-0.433221	0.000755139	0.0439941
253	3R	5565749	5566015	peak_23064_Young	FBgn0037341	CG12746	-0.685565	0.000765137	0.044323
277	3R	29556096	29556355	peak_30603_Young	FBgn0000492	Dr	-0.381749	0.000766593	0.044323
254	2L	16543944	16544210	peak_5437_Young	FBgn0259735	CG42389	-0.608491	0.000782039	0.0450455
268	3L	19496992	19497267	peak_20779_Young	FBgn0036875	CG9449	-0.449592	0.000786726	0.0451451
256	3L	4025135	4025384	peak_16022_Old	FBgn0035484	CG11594	0.775564	0.000798948	0.0456747
255	2L	15836793	15837154	peak_5247_Young	FBgn0028900	CG18518	0.67493	0.000804656	0.0458293
271	X	13954327	13954607	peak_36359_Young	FBgn0030536	CG11068	0.422945	0.000818625	0.0462796
288	X	2137522	2137789	peak_32837_Young	FBgn0004861	ph-p	0.309733	0.000816035	0.0462796
272	2L	18838992	18839253	peak_6094_Young	FBgn0032717	CG10600	-0.441137	0.000847613	0.0477416
270	3R	6741611	6741871	peak_23515_Young	FBgn0051481	pb	-0.432781	0.000853638	0.0479041
281	X	19069579	19069841	peak_37934_Young	FBgn0085359	CG34330	-0.401415	0.000864194	0.0482577
287	2R	23712713	23712983	peak_13888_Young	FBgn0034897	Sesn	-0.34501	0.000866261	0.0482577
265	3R	31754217	31754622	peak_31432_Old	FBgn0039872	salt	0.50303	0.000870244	0.0483033
263	3L	5153473	5153722	peak_16380_Old	FBgn0010747	Srp54k	0.797675	0.000878172	0.0485667
261	2R	9094593	9094842	peak_8936_Young	FBgn0033373	CG8080	-0.754152	0.000888074	0.048937

## Sheet: Geriatric v Young
	seqnames	start	end	peak	annotation_name	symbol	logFC	P.Value	adj.P.Val
1	3R	11353091	11353351	peak_24875_Young	FBgn0026063	KP78b	-1.44532	3.42722e-14	5.23131e-10
2	2R	5608878	5609196	peak_7534_VeryOld	FBgn0039970	CG17508	0.839277	3.87937e-11	2.96073e-07
3	3R	4307671	4307940	peak_22538_Young	FBgn0027930	MP1	-0.889727	1.67213e-10	8.50778e-07
4	2L	4476967	4477251	peak_1698_Young	FBgn0011603	ine	-0.96071	4.48267e-10	1.71059e-06
5	3R	11984549	11984842	peak_25081_Young	FBgn0037974	CG12224	-1.2722	7.60386e-10	2.3213e-06
6	3R	21246650	21246905	peak_27910_Young	FBgn0038874	ETHR	-0.944868	2.62776e-09	6.68503e-06
7	2L	13385094	13385602	peak_4464_Old	FBgn0032517	CG7099	0.813153	3.33215e-09	7.266e-06
8	2L	22018874	22019126	peak_7109_Young	FBgn0028979	tio	-0.880501	4.27346e-09	8.15377e-06
16	X	12031712	12031961	peak_35865_Young	FBgn0030369	Cyp318a1	-1.63988	7.55628e-09	1.28155e-05
11	3L	1882926	1883198	peak_15265_Young	FBgn0035287	CG13937	-1.30257	9.46101e-09	1.44413e-05
9	3R	29682368	29682665	peak_30635_Young	FBgn0013972	Gycalpha99B	-0.750493	1.05734e-08	1.4672e-05
10	2L	19423932	19424190	peak_6322_Young	FBgn0032779	CG16771	-0.713242	1.502e-08	1.88147e-05
12	4	396170	396441	peak_31686_Young	FBgn0262636	Lin29	-0.873217	1.63709e-08	1.88147e-05
14	2L	21656733	21656998	peak_6990_VeryOld	FBgn0032956	Cul2	1.07232	1.72566e-08	1.88147e-05
13	2R	21613012	21613274	peak_13062_Old	FBgn0034639	CG15673	0.751118	1.91557e-08	1.94928e-05
15	3L	16359714	16359973	peak_19775_Young	FBgn0266417	CG45057	-0.926465	2.13033e-08	2.03234e-05
17	3R	29255734	29255999	peak_30525_Young	FBgn0267104	CG45544	-0.818075	3.01192e-08	2.70435e-05
18	2L	14025754	14026003	peak_4672_Young	FBgn0028519	CG4500	-0.771624	3.89425e-08	3.30232e-05
20	3R	9869999	9870248	peak_24457_Young	FBgn0037766	Teh1	-1.25835	5.13509e-08	4.12537e-05
19	3L	10769914	10770311	peak_18048_Young	FBgn0262890	CG43245	-0.958703	5.80568e-08	4.4309e-05
21	3R	14108470	14108739	peak_25687_Young	FBgn0038202	CG12402	-0.786011	1.00011e-07	7.26936e-05
22	3L	15699810	15700086	peak_19538_Young	FBgn0041160	comm2	-0.644726	1.17491e-07	8.15175e-05
23	X	18634787	18635046	peak_37772_Young	FBgn0030941	wgn	-0.796754	1.33599e-07	8.86632e-05
24	2L	3771595	3771904	peak_1479_Young	FBgn0004893	bowl	-0.93409	1.64838e-07	0.000104837
28	3L	1882079	1882357	peak_15263_Young	FBgn0035287	CG13937	-1.12212	2.21599e-07	0.000135299
25	2R	14964527	14964799	peak_10844_Young	FBgn0261854	aPKC	-0.65407	2.30903e-07	0.000135558
26	X	9284297	9284555	peak_34971_Young	FBgn0002576	lz	-0.778949	2.41864e-07	0.000136734
27	2L	19423419	19423683	peak_6321_Young	FBgn0032779	CG16771	-0.616723	2.98661e-07	0.000162813
29	2L	480504	480774	peak_318_Old	FBgn0043364	cbt	0.599379	3.10899e-07	0.00016364
30	3R	11980281	11980541	peak_25080_Young	FBgn0037973	CG18547	-0.797322	3.96327e-07	0.000195146
31	X	1513644	1514248	peak_32554_Young	FBgn0025393	CG14795	-0.922711	3.94991e-07	0.000195146
33	3L	1882630	1882881	peak_15264_Young	FBgn0035287	CG13937	-0.973441	4.34507e-07	0.00020726
32	2L	11155640	11155902	peak_3882_Young	FBgn0032350	CG6287	-0.826592	4.83725e-07	0.000223745
34	3L	15728317	15728571	peak_19549_Young	FBgn0010105	comm	-0.640299	7.23973e-07	0.000322832
35	3R	26440458	26440756	peak_29529_Young	FBgn0263118	tx	-0.872321	7.40247e-07	0.000322832
36	X	12074532	12074975	peak_35874_Mid	FBgn0030373	CG12721	0.774814	9.00485e-07	0.000379793
37	3R	17557520	17557793	peak_26760_Young	FBgn0264005	Hmx	-0.831144	9.2062e-07	0.000379793
38	3L	1349577	1349843	peak_15080_Young	FBgn0029514	CG9166	-0.63541	1.03315e-06	0.000415002
39	2R	11529527	11529790	peak_9776_Young	FBgn0000577	en	-0.782675	1.21187e-06	0.000469218
40	2L	3771977	3772226	peak_1480_Young	FBgn0004893	bowl	-0.92727	1.22961e-06	0.000469218
41	X	6805531	6805784	peak_34278_Young	FBgn0259228	C3G	-0.9762	1.55962e-06	0.000580633
42	X	16701682	16702205	peak_37175_VeryOld	FBgn0030776	CG4653	0.663049	1.72845e-06	0.000618806
43	3L	16091294	16091575	peak_19663_Young	FBgn0036565	CG5235	-0.869085	1.74323e-06	0.000618806
44	3R	7886629	7886891	peak_23813_Young	FBgn0037526	CG10092	0.61527	2.22968e-06	0.000773495
50	3R	4236114	4236363	peak_22503_Young	FBgn0010225	Gel	-1.4225	2.37482e-06	0.000805539
45	3R	8287726	8287984	peak_23938_Young	FBgn0037562	CG11671	0.588172	2.86435e-06	0.000950466
46	2L	18155895	18156160	peak_5867_Young	FBgn0032670	CG5783	-0.664863	3.70677e-06	0.00120383
47	4	396507	396769	peak_31687_Young	FBgn0262636	Lin29	-0.79578	4.10009e-06	0.00127722
48	X	18832432	18832692	peak_37854_Young	FBgn0030964	Pvf1	-0.569357	4.03563e-06	0.00127722
49	X	15689754	15690008	peak_36853_VeryOld	FBgn0030667	CG15599	0.67434	4.92911e-06	0.00150476
51	3R	13812834	13813094	peak_25599_Young	FBgn0259730	tal-1A	-0.63176	5.24124e-06	0.00150948
52	3L	224025	224278	peak_14629_Young	FBgn0053229	CG33229	0.491248	5.19335e-06	0.00150948
53	2R	24767578	24767833	peak_14343_Young	FBgn0027590	GstE12	0.467177	5.20496e-06	0.00150948
54	X	21067510	21067768	peak_38618_Young	FBgn0052512	CG32512	-0.656426	7.17335e-06	0.00202767
55	X	11441649	11441920	peak_35655_Young	FBgn0030300	Sk1	-0.684982	7.52701e-06	0.00204472
56	X	11925086	11925344	peak_35833_Young	FBgn0030357	Sclp	-0.61039	7.6437e-06	0.00204472
57	3L	9423159	9423408	peak_17680_Young	FBgn0023129	aay	-1.02291	7.47441e-06	0.00204472
58	3R	4810013	4810270	peak_22746_Young	FBgn0037279	CG1129	-0.765755	7.7695e-06	0.00204472
61	X	580607	580860	peak_32104_Young	FBgn0261930	vnd	0.406061	8.11025e-06	0.00209822
59	3L	1102376	1102660	peak_14978_Young	FBgn0004870	bab1	-0.657918	8.24797e-06	0.00209828
60	3R	12960354	12960641	peak_25347_Young	FBgn0087021	Spc25	-0.703235	8.66188e-06	0.00216746
62	2R	11397328	11397586	peak_9743_Young	FBgn0082585	sprt	-0.843835	9.60599e-06	0.00236493
63	3L	13939046	13939433	peak_19004_Young	FBgn0052137	CG32137	-0.605469	1.19949e-05	0.0029062
64	X	13669306	13669794	peak_36253_VeryOld	FBgn0030508	CG15760	0.811211	1.28976e-05	0.00307608
65	2R	20236063	20236331	peak_12584_Young	FBgn0034485	CG11099	-0.686223	1.3847e-05	0.00320242
67	3R	12595822	12596122	peak_25266_Young	FBgn0038063	Octbeta2R	-0.482538	1.36444e-05	0.00320242
66	3L	19635138	19635400	peak_20829_VeryOld	FBgn0036896	wnd	0.657972	1.55298e-05	0.00344552
68	3L	1755612	1755873	peak_15236_Young	FBgn0035268	CG8001	-0.787862	1.55752e-05	0.00344552
74	2R	14933904	14934153	peak_10831_VeryOld	FBgn0033984	Lap1	1.06733	1.51731e-05	0.00344552
69	3L	14613358	14613726	peak_19198_Young	FBgn0003388	shd	-0.773003	1.7614e-05	0.00376808
70	2L	17127528	17127794	peak_5610_Young	FBgn0051784	CG31784	0.620109	1.80594e-05	0.00376808
71	3R	17394993	17395246	peak_26721_Mid	FBgn0025456	CREG	0.707184	1.82369e-05	0.00376808
73	2L	20104570	20104837	peak_6536_Young	FBgn0032851	CG13970	0.567716	1.82677e-05	0.00376808
75	3L	224281	224546	peak_14630_Young	FBgn0053229	CG33229	0.484021	1.81074e-05	0.00376808
72	3L	882861	883110	peak_14915_Young	FBgn0035173	CG13907	-0.67438	1.85668e-05	0.00377872
80	3L	7866083	7866383	peak_17166_Young	FBgn0016694	Pdp1	0.452066	1.89157e-05	0.00379907
76	2L	3770898	3771351	peak_1478_Young	FBgn0004893	bowl	-0.601032	2.05611e-05	0.00387462
77	2R	13424856	13425118	peak_10326_Young	FBgn0265272	CG30060	-0.641083	2.04059e-05	0.00387462
78	2L	16485723	16485983	peak_5412_Young	FBgn0005677	dac	-0.613704	2.03243e-05	0.00387462
79	3R	30765496	30765762	peak_31054_Young	FBgn0004606	zfh1	-0.685406	2.0284e-05	0.00387462
82	X	7607976	7608466	peak_34468_Young	FBgn0004198	ct	-0.541944	2.04905e-05	0.00387462
81	2R	24342611	24342882	peak_14163_Young	FBgn0004101	bs	-0.776659	2.19454e-05	0.00405136
83	2L	21828356	21828618	peak_7047_Young	FBgn0003866	tsh	-0.538975	2.20298e-05	0.00405136
100	X	17453265	17453514	peak_37397_Young	FBgn0030841	CG8568	-1.1753	2.35514e-05	0.00427962
84	3L	18087079	18087412	peak_20354_VeryOld	FBgn0085282	CG34253	0.697294	2.49738e-05	0.00445464
85	2L	20494486	20494754	peak_6627_Young	FBgn0054007	CG34007	-0.538398	2.50982e-05	0.00445464
86	3R	4387040	4387299	peak_22567_Mid	FBgn0003882	tub	0.685199	2.63139e-05	0.00461673
87	X	11925571	11925840	peak_35834_Young	FBgn0030357	Sclp	-0.655452	3.07723e-05	0.00527762
89	2R	19268861	19269130	peak_12227_Young	FBgn0003254	rib	-0.522383	3.05024e-05	0.00527762
88	3L	15976860	15977126	peak_19613_Young	FBgn0036551	CG17029	-0.63286	3.25941e-05	0.00540949
90	3R	18199989	18200255	peak_26930_Young	FBgn0011481	Ssdp	0.526213	3.20152e-05	0.00540949
91	2L	21148287	21148543	peak_6879_VeryOld	FBgn0086251	del	0.747946	3.43329e-05	0.00540949
92	2L	16451044	16451318	peak_5406_Young	FBgn0020414	Idgf3	-0.85171	3.40031e-05	0.00540949
93	3R	27150077	27150326	peak_29791_VeryOld	FBgn0029155	Men-b	0.557734	3.43296e-05	0.00540949
94	2L	3706954	3707214	peak_1446_Young	FBgn0051777	CG31777	0.563146	3.39784e-05	0.00540949
96	2R	10618362	10618639	peak_9510_Young	FBgn0033538	CG11883	-0.508083	3.29187e-05	0.00540949
97	2R	10617483	10617740	peak_9509_Young	FBgn0033538	CG11883	-0.483577	3.43763e-05	0.00540949
95	2R	20698292	20698547	peak_12725_Mid	FBgn0040726	dpr	0.649095	3.50104e-05	0.00542394
101	3L	11065884	11066139	peak_18167_Young	FBgn0025355	SuUR	-0.550899	3.51789e-05	0.00542394
103	3R	30388051	30388337	peak_30914_Old	FBgn0015221	Fer2LCH	0.453337	3.58574e-05	0.00547328
98	3L	17421383	17421646	peak_20125_Young	FBgn0027660	blot	-0.601813	3.64592e-05	0.00551003
99	3L	16359339	16359610	peak_19774_Young	FBgn0266417	CG45057	-0.761165	3.75016e-05	0.005612
[truncated: 5,797 more rows]

## Sheet: Geriatric v Young p<0.05
	seqnames	start	end	peak	annotation_name	symbol	logFC	P.Value	adj.P.Val
[truncated: 290 more rows]
