# Supplementary material for: Age-related changes in polycomb gene regulation disrupt lineage fidelity in intestinal stem cells
Source: eLife. 2021 Mar 16;10:e62250. doi: 10.7554/eLife.62250 (PMC7984841; doi:10.7554/eLife.62250)
Supplement: Supplementary file 2. — Related to Figure 1. Differential gene expression analysis between aged time-points (mid-age, old and geriatric) and young ISCs. Tabs separate age comparisons and significantly regulated genes. [file elife-62250-supp2.xlsx]

## Sheet: Midage vs Young unfiltered
annotation_name	logFC	p	pval	symbol
FBgn0038681	1.39519	0.0175384	1.97239e-06	Cyp12a4
FBgn0033926	1.31598	0.0210745	9.49491e-06	Arc1
FBgn0051288	1.72648	0.0210745	9.57278e-06	CG31288
FBgn0030367	-2.09321	0.0210745	1.04861e-05	Cyp311a1
FBgn0051370	1.0413	0.0210745	1.50038e-05	CG31370
FBgn0002985	1.19762	0.0210745	1.65241e-05	odd
FBgn0040726	2.43403	0.0210745	1.85972e-05	dpr
FBgn0263974	4.73343	0.0210745	1.92233e-05	qin
FBgn0261089	2.5456	0.0210745	2.13304e-05	Sytalpha
FBgn0261873	1.52878	0.0217861	2.45008e-05	sdt
FBgn0003187	3.78817	0.0743938	9.20301e-05	qua
FBgn0266450	0.764208	0.0894916	0.000120771	Kr-h1
FBgn0034390	-0.8637	0.0898273	0.000141319	CG15093
FBgn0262854	-1.3545	0.0898273	0.000141428	CG43218
FBgn0050090	1.27074	0.0899108	0.000167916	CG30090
FBgn0004892	0.885993	0.0899108	0.000183562	sob
FBgn0032297	-0.793744	0.0899108	0.000187355	CG17124
FBgn0038498	0.76008	0.0899108	0.000191743	beat-IIa
FBgn0010225	-1.20821	0.0899108	0.000196122	Gel
FBgn0025525	1.24037	0.0899108	0.000208049	bab2
FBgn0034399	-1.01495	0.0899108	0.00021234	CG15083
FBgn0262742	2.72422	0.0954187	0.000236079	Fas1
FBgn0031490	1.15866	0.0968957	0.000258697	CG17264
FBgn0051104	2.31575	0.0968957	0.000261527	CG31104
FBgn0000015	3.48823	0.104062	0.000297303	Abd-B
FBgn0033174	0.781624	0.104062	0.000319106	CG11125
FBgn0032482	-0.550869	0.104062	0.000327196	Pect
FBgn0037525	1.25565	0.104062	0.000336581	CG17816
FBgn0019643	0.693682	0.104062	0.000344912	Dat
FBgn0031805	0.675227	0.104062	0.000375591	CG9505
FBgn0035167	2.0697	0.104062	0.000387114	Gr61a
FBgn0039319	1.41892	0.104062	0.000390904	CG13659
FBgn0040256	0.957607	0.104062	0.00041873	Ugt86Dd
FBgn0002735	1.61491	0.104062	0.000423269	E(spl)mgamma-HLH
FBgn0030189	0.825931	0.104062	0.000439705	CG2909
FBgn0029710	1.45088	0.104062	0.00046729	CG3568
FBgn0026592	1.86534	0.104062	0.000481509	Fie
FBgn0023129	-0.917482	0.104062	0.000485842	aay
FBgn0039877	-0.561104	0.104062	0.000486735	CG2118
FBgn0031643	0.632469	0.104062	0.000493635	CG3008
FBgn0262631	2.06503	0.104062	0.000506989	CR43148
FBgn0037623	0.891032	0.104062	0.000507705	CG9801
FBgn0039316	1.86978	0.104062	0.000513664	CG11893
FBgn0034156	1.319	0.104062	0.000514928	CG5348
FBgn0003710	1.49797	0.106303	0.000537968	tipE
FBgn0004646	1.7264	0.108683	0.000566175	ogre
FBgn0003285	1.44933	0.108683	0.000584851	rst
FBgn0003996	-0.556316	0.108683	0.000586683	w
FBgn0034756	2.0329	0.109199	0.000601751	Cyp6d2
FBgn0035886	3.7362	0.110529	0.000621509	Jon66Ci
FBgn0038494	1.74312	0.111026	0.000645145	beat-IIb
FBgn0264679	-0.840274	0.111026	0.000649274	CR43964
FBgn0051997	2.4201	0.111372	0.000663825	CG31997
FBgn0261046	1.34136	0.112884	0.000689556	Dscam3
FBgn0051097	3.02591	0.112884	0.000698227	CG31097
FBgn0265623	0.949334	0.115177	0.000725363	Su(z)2
FBgn0052625	3.01733	0.123039	0.000797202	CG32625
FBgn0030778	0.941228	0.123039	0.000802548	CG4678
FBgn0033928	0.774877	0.12867	0.000854618	Arc2
FBgn0003204	-0.445191	0.12867	0.000878678	ras
FBgn0034437	2.85588	0.12867	0.000893223	CG10051
FBgn0039273	0.653209	0.12867	0.000910012	CG9996
FBgn0261575	2.30207	0.12867	0.000911627	tobi
FBgn0040493	-0.513747	0.128731	0.000934905	grsm
FBgn0030607	1.93473	0.128731	0.000941018	dob
FBgn0259937	-0.445427	0.148796	0.00110442	Nop60B
FBgn0034291	2.69926	0.148928	0.00112215	CG5770
FBgn0024920	-0.87113	0.152777	0.00116833	Ts
FBgn0000210	1.24453	0.153885	0.00119412	br
FBgn0032629	2.3814	0.156972	0.00123572	beat-IIIc
FBgn0262636	-1.54429	0.157759	0.00125966	Lin29
FBgn0086254	-0.479597	0.17356	0.00144324	CG6084
FBgn0034670	-0.627271	0.17356	0.00145484	CG13488
FBgn0003944	0.820377	0.17356	0.00148001	Ubx
FBgn0041182	0.762024	0.17356	0.00151124	Tep2
FBgn0037844	1.93621	0.17356	0.00152157	CG4570
FBgn0027550	1.05968	0.17356	0.00155949	CG6495
FBgn0010389	2.36611	0.17356	0.00157205	htl
FBgn0000451	1.04314	0.17356	0.00158756	ect
FBgn0025641	-0.87615	0.17356	0.00160164	DAAM
FBgn0031974	-0.73264	0.17356	0.00161961	CG12560
FBgn0043853	1.09836	0.17356	0.00162544	scaRNA:MeU5-C46
FBgn0264273	0.716197	0.17356	0.00163879	Sema-2b
FBgn0034740	1.73486	0.17356	0.00163956	nsr
FBgn0024244	0.492609	0.181193	0.00175556	drm
FBgn0010100	-0.449875	0.181193	0.00180314	Acon
FBgn0002570	1.62342	0.181193	0.00182006	Mal-A1
FBgn0035083	-0.506136	0.181193	0.00183091	Tina-1
FBgn0015946	2.02557	0.181193	0.00185108	grim
FBgn0027330	-0.445484	0.181193	0.00185697	l(1)G0020
FBgn0024995	-1.0773	0.181193	0.00187224	CG2680
FBgn0013323	1.32742	0.181193	0.00188709	Ptth
FBgn0014469	0.864738	0.181193	0.00189507	Cyp4e2
FBgn0037810	-0.570921	0.189704	0.00200581	sle
FBgn0266742	1.64348	0.189704	0.00203751	CR45215
FBgn0010812	-0.52318	0.189704	0.00204809	unc-45
FBgn0038330	1.09708	0.192074	0.00209527	CG14868
FBgn0032517	0.441312	0.193605	0.00214708	CG7099
FBgn0035162	-0.579142	0.193605	0.00216944	CG13900
FBgn0036240	0.480219	0.193605	0.0021946	CG6928
FBgn0033188	-0.799604	0.193605	0.00221572	Drat
FBgn0265068	-0.438573	0.193605	0.00222084	CR44179
FBgn0031489	0.703612	0.197475	0.00228744	CG17224
FBgn0259927	1.31149	0.200073	0.00234004	CG42450
FBgn0032981	1.98622	0.201976	0.00238501	CG3635
FBgn0083990	2.56317	0.204258	0.00243492	sphinx
FBgn0003071	-0.499629	0.210539	0.00253348	Pfk
FBgn0023537	-0.387305	0.216511	0.00262969	CG17896
FBgn0026718	-0.596662	0.22038	0.00270146	fu12
FBgn0033471	-0.519965	0.221648	0.00276774	CG12134
FBgn0015766	1.14517	0.221648	0.00279564	Msr-110
FBgn0010452	-0.478635	0.221648	0.00279808	trn
FBgn0035907	-0.776884	0.221648	0.00281898	GstO1
FBgn0038964	-0.516241	0.221648	0.00286397	Nop56
FBgn0029708	3.34091	0.221648	0.00286657	CG3556
FBgn0037021	0.500139	0.224585	0.0029298	CG11399
FBgn0051098	0.976091	0.226094	0.00297492	CG31098
FBgn0266581	-0.373816	0.227726	0.003022	pit
FBgn0004859	-2.59327	0.230899	0.00312841	ci
FBgn0034950	1.5575	0.230899	0.00314205	Pask
FBgn0263510	-0.483123	0.230899	0.00314933	nclb
FBgn0004635	0.972583	0.230899	0.00318155	rho
FBgn0033945	1.43651	0.230899	0.00319395	CG12868
FBgn0034403	2.03753	0.233186	0.00325181	CG18190
FBgn0015038	0.813831	0.235957	0.00331698	Cyp9b1
FBgn0011710	-0.421854	0.24045	0.00340719	2020-09-01
FBgn0023525	1.02138	0.241119	0.00344378	CG3191
FBgn0033348	0.820488	0.241812	0.00348088	Spt
FBgn0015399	1.9953	0.241835	0.0035084	kek1
FBgn0259711	1.27923	0.245149	0.0036051	CG42365
FBgn0267727	-0.673332	0.245149	0.00361162	Pen
FBgn0039294	1.07828	0.245722	0.00366872	Cad96Cb
FBgn0260755	0.724409	0.245722	0.00368045	CG42553
FBgn0025815	-0.499919	0.245722	0.00371884	Mcm6
FBgn0038118	-0.571235	0.245722	0.0037306	timeout
FBgn0030976	0.880333	0.249509	0.00381615	CG7378
FBgn0040351	1.86628	0.250707	0.00386267	CG11638
FBgn0052626	-0.405466	0.254164	0.00396642	AMPdeam
FBgn0004872	1.35949	0.254164	0.00398693	piwi
FBgn0034971	-0.332564	0.254164	0.0040269	CG3209
FBgn0003159	0.80591	0.254164	0.00403027	ptr
FBgn0039025	-0.597113	0.25469	0.00406725	Usp12-46
FBgn0032051	-0.454569	0.256024	0.00414318	CG13097
FBgn0034599	0.594714	0.256024	0.00419597	hng1
FBgn0262357	3.46497	0.256024	0.00420482	CG43055
FBgn0027836	0.364556	0.256024	0.0042145	Dgp-1
FBgn0267348	-0.449561	0.256024	0.00423252	LanB2
FBgn0010482	3.85786	0.25817	0.00429703	l(2)01289
FBgn0031968	-0.492395	0.267577	0.00448368	CG7231
FBgn0011822	1.14808	0.268706	0.00455418	pcl
FBgn0261989	2.98045	0.268706	0.00456834	CG42807
FBgn0036126	0.710441	0.268706	0.00459326	CG6272
FBgn0030484	-0.99889	0.269426	0.00463588	GstT4
FBgn0040056	-0.429062	0.269444	0.00466844	CG17698
FBgn0037138	0.603816	0.269444	0.00469678	P5CDh1
FBgn0030723	1.48774	0.271559	0.0047642	dpr18
FBgn0030506	0.798075	0.272264	0.00480719	Lig4
FBgn0050022	0.839043	0.277951	0.00499438	CG30022
FBgn0038721	1.52291	0.277951	0.00507079	subdued
FBgn0266215	-0.813747	0.277951	0.00508913	CR44910
FBgn0267486	1.22394	0.277951	0.00514448	Ptp36E
FBgn0046247	0.385173	0.277951	0.00520302	CG5938
FBgn0038404	1.37303	0.277951	0.00520438	CG8925
FBgn0085377	0.379079	0.277951	0.00520532	CG34348
FBgn0260745	-1.51458	0.277951	0.00521639	mfas
FBgn0031114	0.550852	0.277951	0.00523354	cactin
FBgn0267636	1.97145	0.277951	0.0052794	CR45974
FBgn0266129	3.28877	0.277951	0.0053149	lov
FBgn0027538	0.528871	0.277951	0.00535479	beta4GalNAcTA
FBgn0004839	0.397002	0.277951	0.00536352	otk
FBgn0004861	0.72621	0.277951	0.00536409	ph-p
FBgn0029861	0.379147	0.277951	0.00537647	CG3815
FBgn0031799	0.422478	0.28093	0.00546569	Pez
FBgn0263235	1.56178	0.291893	0.00572712	Phae2
FBgn0085400	1.38595	0.291893	0.00574463	CG34371
FBgn0037073	-0.338667	0.292182	0.00578318	CG7338
FBgn0086253	0.627929	0.292385	0.00582008	rumi
FBgn0264907	1.22083	0.293722	0.00588424	CG44098
FBgn0039201	3.27954	0.293722	0.00597531	CG13617
FBgn0039341	-0.397613	0.293722	0.00601411	CG5112
FBgn0027093	-0.351631	0.293722	0.0060384	Aats-arg
FBgn0000489	3.79984	0.293722	0.00605157	Pka-C3
FBgn0086898	1.18615	0.293722	0.00610315	dgo
FBgn0060296	-0.361092	0.293722	0.00610739	pain
FBgn0026196	-0.432209	0.293722	0.00611095	nop5
FBgn0016131	-0.402289	0.294333	0.0061848	Cdk4
FBgn0263740	-0.346543	0.294333	0.00618987	eIF-2gamma
FBgn0004644	1.25825	0.29632	0.00632775	hh
FBgn0036481	1.58474	0.29632	0.00633861	CG16959
FBgn0000071	1.64104	0.29632	0.00636449	Ama
FBgn0004108	0.583951	0.29632	0.00636495	Nrt
FBgn0037580	-0.322852	0.302611	0.00653412	DppIII
FBgn0032774	1.80608	0.303672	0.0066086	CG17549
FBgn0000064	-0.362567	0.303672	0.00662533	Ald
FBgn0264564	2.77188	0.304519	0.00676244	CR43936
FBgn0010435	1.06801	0.304519	0.00682968	emp
FBgn0034279	-0.751011	0.304519	0.00685823	CG18635
FBgn0032050	-0.358085	0.304519	0.00686093	CG13096
FBgn0264307	0.659571	0.304519	0.00686349	orb2
FBgn0035461	-1.25114	0.304519	0.00686767	ntc
FBgn0050410	-0.394598	0.304519	0.00690029	Rpi
FBgn0038989	-0.405028	0.304519	0.00696725	CG6937
FBgn0262366	1.30611	0.304519	0.00698541	CG43064
FBgn0025865	-0.387847	0.304519	0.00698627	Cortactin
FBgn0032701	-0.44113	0.307638	0.00709242	CG10341
FBgn0038454	0.510929	0.307867	0.00718677	CG10324
FBgn0038145	-0.376213	0.307867	0.00722973	Droj2
FBgn0259738	1.15471	0.307867	0.00725734	CG42392
FBgn0052582	2.56204	0.307867	0.00727323	CR32582
FBgn0262620	1.47838	0.307867	0.00729468	CR43144
FBgn0264328	-0.368976	0.307867	0.00732417	CR43787
FBgn0024352	-0.491096	0.307867	0.00734518	Hop
FBgn0037391	0.629094	0.307867	0.00737469	CG2017
FBgn0032670	-0.840911	0.309807	0.00747899	CG5783
FBgn0027843	1.39506	0.309807	0.0075526	CAH2
FBgn0031012	0.440437	0.309807	0.00755845	CG8051
FBgn0052057	0.645483	0.309807	0.00758606	dpr10
FBgn0012036	-0.381259	0.309807	0.00759537	Aldh
FBgn0038467	-0.400494	0.311762	0.00768766	AdSL
FBgn0053126	0.868675	0.311762	0.0077998	NLaz
FBgn0034035	-0.527284	0.311762	0.00780623	CG8207
FBgn0001230	-2.08232	0.311762	0.00781802	Hsp68
FBgn0003074	-0.347717	0.311762	0.00781859	Pgi
FBgn0037137	-0.389389	0.313439	0.00793561	Nopp140
FBgn0004118	2.64335	0.313439	0.00794438	nAChRbeta2
FBgn0037549	-0.328576	0.313439	0.0079664	CG7878
FBgn0000092	1.46949	0.314345	0.00802478	CG2650
FBgn0037894	-0.357313	0.314891	0.00807414	Ranbp9
FBgn0030309	-0.61841	0.316483	0.00815053	CG1572
FBgn0032897	1.53562	0.317448	0.00821109	CG9336
FBgn0038720	0.924033	0.321071	0.00834092	CG6231
FBgn0033502	0.516689	0.321763	0.00839506	CG12910
FBgn0039993	-0.451649	0.323841	0.00849493	CG17691
FBgn0032869	-1.38636	0.323841	0.00853447	CG17470
FBgn0034663	1.41653	0.323841	0.00855854	CG4363
FBgn0260456	-0.419848	0.329367	0.00874164	CG4806
FBgn0002780	-0.46652	0.33053	0.00881446	mod
FBgn0260660	1.61417	0.33053	0.00889176	Mp
FBgn0026761	-0.333596	0.33053	0.00895977	Trap1
FBgn0265045	-0.704945	0.33053	0.00896155	Strn-Mlck
FBgn0032925	-0.596777	0.33053	0.00898683	CG9246
FBgn0030629	1.37354	0.33053	0.00900786	CG9123
FBgn0000256	-0.81499	0.33053	0.00919924	capu
FBgn0034194	-0.354919	0.33053	0.00922347	CG15611
FBgn0036660	0.5271	0.33053	0.00922723	CG13025
FBgn0038326	-0.371422	0.33053	0.00927753	CG5044
FBgn0037709	-0.334973	0.33053	0.0092875	CG8199
FBgn0025835	1.21569	0.33053	0.00930201	CG17707
FBgn0267763	1.85784	0.33053	0.00933664	CR46094
FBgn0038473	-0.338748	0.33053	0.00944052	Ns1
FBgn0037071	0.571143	0.33053	0.00947926	CG7632
FBgn0030314	0.478807	0.33053	0.00949395	CG11696
FBgn0036386	0.849686	0.33053	0.00952676	CG8833
FBgn0039277	1.87739	0.33053	0.00955813	CG13650
FBgn0005612	0.354961	0.33053	0.00957072	Sox14
FBgn0032679	-0.349367	0.33053	0.00959508	bsf
FBgn0266409	0.347705	0.33053	0.00960432	CG45049
FBgn0263863	-0.384577	0.33053	0.00962428	mRpL45
FBgn0250876	-0.571326	0.33053	0.00963799	Sema-5c
FBgn0035948	1.85444	0.33053	0.00969637	CG5644
FBgn0051974	-0.652791	0.33053	0.009734	CG31974
FBgn0039462	0.888945	0.33053	0.00973896	CG14252
FBgn0029526	0.764099	0.330944	0.00978837	CR18166
FBgn0028990	0.680837	0.333701	0.00990746	Spn27A
FBgn0259682	-0.493687	0.334519	0.00997493	Jabba
FBgn0037163	0.741679	0.334519	0.010007	laza
FBgn0033377	-0.315959	0.338226	0.0101559	Pmm45A
FBgn0030796	2.74463	0.338339	0.0102335	CG4829
FBgn0033196	1.05284	0.338339	0.0102354	CG1358
FBgn0040397	0.800325	0.339497	0.0103086	CG3655
FBgn0030512	-0.424738	0.339712	0.0103534	CG9940
FBgn0000579	-0.371711	0.339859	0.010396	Eno
FBgn0039175	-0.332471	0.34153	0.0104856	CG5706
FBgn0038897	-0.325049	0.343541	0.010586	CG5849
FBgn0003278	-0.340594	0.345054	0.0106714	RpI135
FBgn0021765	-0.316624	0.34682	0.0107999	scu
FBgn0039818	-0.592529	0.34682	0.0108172	CG11318
FBgn0264745	1.51878	0.34682	0.0108464	CR44003
FBgn0261243	-0.338464	0.34682	0.010882	Psa
FBgn0035638	-0.49531	0.347734	0.0109498	Tektin-C
FBgn0030411	0.514065	0.349065	0.0110605	CG2540
FBgn0261611	2.47202	0.349065	0.0110702	CG42700
FBgn0035515	-0.362224	0.351089	0.0111739	CG14997
FBgn0027578	1.57922	0.351182	0.0112581	CG14526
FBgn0040251	0.378835	0.351182	0.0112605	Ugt86Di
FBgn0259998	2.84879	0.351182	0.0112953	CG17571
FBgn0003502	0.617856	0.351902	0.0114182	Btk29A
FBgn0020236	-0.358662	0.351902	0.0114339	ATPCL
FBgn0038146	-0.358213	0.351902	0.0114429	CG9799
FBgn0039315	1.30771	0.351902	0.011612	CG13658
FBgn0028479	-0.34424	0.351902	0.0116181	Mtpalpha
FBgn0038128	0.594175	0.351902	0.0116192	Ravus
FBgn0031498	0.670993	0.351902	0.0116358	CG17260
FBgn0087013	-0.3109	0.351902	0.0116687	Karybeta3
FBgn0040360	0.605789	0.351902	0.0116947	CG14626
FBgn0263780	-2.07344	0.351902	0.0117142	CG17684
FBgn0037517	1.0485	0.352198	0.0117644	CG10086
FBgn0033921	-2.93285	0.352198	0.0118384	tej
FBgn0034797	0.948949	0.352198	0.0118429	nahoda
FBgn0085424	1.06555	0.35265	0.0119194	nub
FBgn0260049	-0.308612	0.35265	0.0119478	flr
FBgn0264960	1.90973	0.35265	0.0119771	CR44129
FBgn0015609	2.9137	0.353387	0.0120419	CadN
FBgn0000810	0.436625	0.355223	0.0121444	fs(1)K10
FBgn0031912	-0.339402	0.358901	0.0123105	CG5261
FBgn0027594	0.308361	0.358937	0.0123521	drpr
FBgn0031711	-0.381309	0.359183	0.0124009	CG6907
FBgn0032213	2.95817	0.3594	0.0124488	CG5390
FBgn0026148	0.778274	0.359814	0.0125037	CG12253
FBgn0013995	-0.500016	0.360097	0.012699	Calx
FBgn0036710	0.583908	0.360097	0.0127443	CG6479
FBgn0041627	1.14856	0.360097	0.0128311	Ku80
FBgn0031734	3.03184	0.360097	0.012864	CG11147
FBgn0014931	0.868358	0.360097	0.0128783	CG2678
FBgn0014869	-0.283883	0.360097	0.012903	Pglym78
FBgn0261113	0.442011	0.360097	0.0129156	Xrp1
FBgn0031650	2.1766	0.360097	0.0129657	CG14044
FBgn0033557	-0.425835	0.360097	0.0129842	CG12325
FBgn0023076	0.360745	0.360097	0.0129905	Clk
FBgn0267241	-1.96245	0.360097	0.013048	CR45681
FBgn0050043	-0.464939	0.360097	0.0130902	CG30043
FBgn0040918	-0.369453	0.360097	0.0131145	schlank
FBgn0265003	-0.407476	0.360097	0.0131157	koi
FBgn0259740	-0.511148	0.360097	0.0131881	CG42394
FBgn0038586	0.596174	0.360097	0.0131969	CG7168
FBgn0016076	0.480121	0.360097	0.0132019	vri
FBgn0038680	1.32934	0.362925	0.0133502	Cyp12a5
FBgn0031630	-1.4305	0.362925	0.0133873	CG15629
FBgn0002174	-0.310202	0.362999	0.0134308	l(2)tid
FBgn0032138	-0.401854	0.364973	0.013572	CG4364
FBgn0027341	0.645354	0.364973	0.0135903	Gfat1
FBgn0015040	-0.338995	0.364973	0.013627	Cyp9c1
FBgn0034496	-0.371215	0.367942	0.0137805	CG9143
FBgn0264878	2.77402	0.367942	0.0139846	CR44069
FBgn0025814	-0.559868	0.367942	0.0139889	Mgstl
FBgn0014028	-0.34854	0.367942	0.0139961	SdhB
FBgn0259214	-0.396202	0.367942	0.0140615	PMCA
FBgn0039909	-0.375486	0.367942	0.0141094	CG1970
FBgn0021979	-0.301528	0.367942	0.0141141	l(2)k09913
FBgn0034894	-0.366662	0.367942	0.0142648	CG4091
FBgn0035251	-0.276077	0.367942	0.0142992	CG7967
FBgn0038088	0.743649	0.367942	0.0143094	CG10126
FBgn0033051	-0.573344	0.367942	0.0143427	Strica
FBgn0028427	-0.328291	0.367942	0.014379	Ilk
FBgn0266569	-0.564513	0.367942	0.0143971	CG42259
FBgn0026143	-0.35086	0.367942	0.014428	CDC45L
FBgn0039241	-0.380888	0.367942	0.0144332	CG11089
FBgn0029969	-0.346765	0.367942	0.014455	CG10932
FBgn0032864	-0.349019	0.367942	0.0144947	CG2493
FBgn0015019	-0.394812	0.367942	0.0145209	Cctgamma
FBgn0000615	0.601727	0.367942	0.0145474	exu
FBgn0032047	1.12488	0.367942	0.0145654	CG13088
FBgn0022935	0.370058	0.372888	0.014882	D19A
FBgn0023000	-0.404775	0.372888	0.0149154	mth
FBgn0032242	-0.297314	0.372888	0.0149586	CG5355
FBgn0261931	0.62454	0.372888	0.0150567	CG42797
FBgn0004364	-0.513617	0.372888	0.0151329	18w
FBgn0032614	0.536017	0.372888	0.0152597	CG13284
FBgn0046225	0.444264	0.372888	0.0152642	CG17230
FBgn0034577	-0.32599	0.372888	0.0152736	cpa
FBgn0046296	0.366134	0.372888	0.015317	CG11534
FBgn0001225	-1.66628	0.372888	0.0153244	Hsp26
FBgn0026144	1.6088	0.372888	0.0153559	CBP
FBgn0027279	-0.430748	0.372888	0.0153905	l(1)G0196
FBgn0267733	0.363036	0.372888	0.0155103	CR46064
FBgn0036272	-0.473516	0.372888	0.0155408	CG4300
FBgn0036953	-2.0861	0.372888	0.015552	CG17145
FBgn0033079	-0.43017	0.372888	0.0155883	Fmo-2
FBgn0029882	-0.413956	0.372888	0.0155914	CG3226
FBgn0028487	0.334229	0.372888	0.015647	f-cup
FBgn0033446	-0.392959	0.372888	0.0157767	CG1648
FBgn0051373	-0.60247	0.372888	0.0157815	CG31373
FBgn0030720	-0.290696	0.372888	0.0157976	CG8939
FBgn0037622	0.431001	0.372888	0.0158057	CG8202
FBgn0023542	-0.350714	0.372888	0.0158726	Nmd3
FBgn0039645	2.65031	0.372888	0.0158971	CG11898
FBgn0039075	1.6943	0.372888	0.0158984	CG4393
FBgn0037949	0.61693	0.372888	0.0159079	CG17360
FBgn0025742	-0.303249	0.372888	0.0159463	mtm
FBgn0024238	-0.415762	0.372888	0.0159698	Fim
FBgn0026376	0.501973	0.372888	0.0159773	Rgl
FBgn0033404	1.09346	0.373971	0.0161749	Or45a
FBgn0010173	-0.348253	0.373971	0.016228	RpA-70
FBgn0028546	-0.355586	0.373971	0.0163729	ics
FBgn0020493	0.569146	0.373971	0.0164056	Dad
FBgn0034861	1.65079	0.373971	0.0164873	CG9815
FBgn0034067	0.480707	0.373971	0.0165613	CG8399
FBgn0035526	-0.601207	0.373971	0.0165731	CG1316
FBgn0038418	0.490627	0.373971	0.0166479	pad
FBgn0028919	0.412974	0.373971	0.0166665	CG16865
FBgn0053926	2.58776	0.373971	0.0166751	CG33926
FBgn0026061	1.02028	0.373971	0.0166765	Mipp1
FBgn0023530	0.60559	0.373971	0.0167206	CG3740
FBgn0038877	-0.412367	0.373971	0.0167355	CG3308
FBgn0039349	-0.339626	0.373971	0.0167491	Ssadh
FBgn0034396	1.51607	0.373971	0.0167735	CG15097
FBgn0036566	-0.335157	0.373971	0.0168068	ClC-c
FBgn0035960	0.688342	0.373971	0.0168563	CG4942
FBgn0035087	-0.433436	0.373971	0.0168668	CG2765
FBgn0263039	-0.669446	0.373971	0.0169846	CR43334
FBgn0034705	0.578961	0.373971	0.0170163	CG11170
FBgn0037082	0.553846	0.373971	0.0171074	CG5664
FBgn0026313	0.410808	0.373971	0.0172453	X11L
FBgn0264449	0.654532	0.373971	0.0173118	CG43867
FBgn0029890	-0.524672	0.373971	0.0173784	CG4095
FBgn0034704	0.338736	0.373971	0.0173818	CG6758
FBgn0086359	0.831816	0.373971	0.0173851	Invadolysin
FBgn0039761	2.96293	0.373971	0.0174	CG18404
FBgn0024754	-0.281994	0.373971	0.0174075	Flo1
FBgn0024315	1.08974	0.373971	0.0174577	Picot
FBgn0029928	1.08207	0.373971	0.0174971	CG3032
FBgn0038380	2.56746	0.373971	0.0176229	CG14877
FBgn0004832	0.424633	0.373971	0.0176974	Xpac
FBgn0024558	-0.348513	0.373971	0.0177779	Dph5
FBgn0022764	0.434722	0.373971	0.0179221	Sin3A
FBgn0031878	-0.562126	0.373971	0.0179312	sip2
FBgn0031868	-0.299956	0.373971	0.0179787	Rat1
FBgn0034315	-0.282838	0.373971	0.0179826	CG5721
FBgn0038738	-0.468564	0.373971	0.0179896	CG4572
FBgn0261802	-0.438661	0.373971	0.0180923	CG42748
FBgn0030960	0.360467	0.373971	0.0181509	Atg101
FBgn0051368	0.313327	0.373971	0.0181544	CG31368
FBgn0038446	0.660564	0.373971	0.0181766	CG14903
FBgn0028895	0.495133	0.373971	0.0181861	CG17328
FBgn0037955	-0.335687	0.373971	0.0182196	CG6950
FBgn0019662	0.359284	0.373971	0.0182216	qm
FBgn0004449	0.755852	0.373971	0.0182659	Ten-m
FBgn0003495	1.15592	0.373971	0.0182778	spz
FBgn0025366	-0.525113	0.373971	0.0182942	Ip259
FBgn0036301	-0.481786	0.373971	0.0183202	CG4069
FBgn0036725	1.70062	0.373971	0.0183312	CG18265
FBgn0029896	2.11197	0.373971	0.018377	CG3168
FBgn0261788	1.30911	0.373971	0.0183925	Ank2
FBgn0032233	1.18394	0.373971	0.0184029	dpr19
FBgn0266705	1.86497	0.373971	0.0184547	CR45195
FBgn0001970	0.58695	0.373971	0.0185311	Pgant35A
FBgn0085203	0.716231	0.373971	0.0185527	CG34174
FBgn0038476	-0.379793	0.373971	0.0185676	kuk
FBgn0040319	0.304129	0.373971	0.0186104	Gclc
FBgn0033379	-0.305707	0.373971	0.0186199	Mys45A
FBgn0031004	-0.505542	0.373971	0.0186741	CG7992
FBgn0025642	2.32106	0.373971	0.0186804	CG32812
FBgn0030852	2.03229	0.373971	0.0187784	CG8316
FBgn0037305	-0.610522	0.373971	0.0188692	CG12173
FBgn0035953	0.410102	0.373971	0.018873	CG5087
FBgn0038619	0.721499	0.373971	0.0189081	CG7685
FBgn0037562	1.05613	0.373971	0.0189257	CG11671
FBgn0031760	0.365706	0.373971	0.0189375	Tsp26A
FBgn0004395	0.442826	0.373971	0.0189403	unk
FBgn0034237	-0.296497	0.373971	0.0189559	eIF3-S9
FBgn0034282	-0.254308	0.373971	0.0189677	Mapmodulin
FBgn0029939	0.693563	0.374434	0.0190333	CG9650
FBgn0263755	-0.569151	0.375367	0.0191583	Su(var)3-9
FBgn0032684	2.77054	0.375367	0.0191791	CG10178
FBgn0025620	2.07999	0.375367	0.0192711	CG13360
FBgn0001125	-0.323117	0.375367	0.0192979	Got2
FBgn0035691	1.23295	0.375367	0.0193498	CG7386
FBgn0011291	0.589285	0.375367	0.0193612	Taf11
FBgn0036288	-0.387426	0.375367	0.019407	CG10660
FBgn0263607	0.561481	0.375367	0.0194371	l(3)72Dp
FBgn0030511	-0.488216	0.375367	0.0194606	CG11158
FBgn0025712	-0.991401	0.380364	0.0197625	CG13920
FBgn0260486	0.942032	0.380633	0.0198193	Ziz
FBgn0262970	0.391404	0.381266	0.0199223	CR43281
FBgn0039631	0.590151	0.381266	0.019938	Sirt7
FBgn0030654	0.547759	0.384319	0.0201409	CG15643
FBgn0039623	0.398693	0.384878	0.0202573	CG1951
FBgn0001226	-1.81201	0.384878	0.0202662	Hsp27
FBgn0032946	0.729316	0.384878	0.0203421	nrv3
FBgn0030217	0.447016	0.384878	0.0204138	CG2124
FBgn0262524	0.769139	0.384878	0.0205241	ver
FBgn0039532	0.321564	0.384878	0.0205327	Mtl
FBgn0266064	0.526854	0.384878	0.0205388	GlyS
FBgn0038832	3.42163	0.384878	0.0206111	CG15695
FBgn0000250	-0.34509	0.384878	0.0206837	cact
FBgn0039296	1.01152	0.384878	0.0207308	CG10420
FBgn0032075	0.963445	0.384878	0.0208501	Tsp29Fb
FBgn0030056	0.315409	0.384878	0.0208745	CG11284
FBgn0262559	-0.304748	0.384878	0.0208904	Mdh2
FBgn0034724	-0.382558	0.384878	0.020919	babos
FBgn0086704	1.51177	0.384878	0.0209413	stops
FBgn0031894	0.844738	0.384878	0.0209746	CG4496
FBgn0038260	-0.778396	0.384878	0.0210669	CG14855
FBgn0015929	-0.38211	0.384878	0.0211214	dpa
FBgn0041184	-0.300043	0.384878	0.0211512	Socs36E
FBgn0014343	0.936633	0.384878	0.021155	mirr
FBgn0033438	1.84303	0.384878	0.021172	Mmp2
FBgn0037473	0.405518	0.384878	0.0211845	CG10068
FBgn0038924	-0.461266	0.384878	0.0211951	CG6028
FBgn0031654	-2.80771	0.384878	0.0212295	Jon25Bii
FBgn0001091	-0.361135	0.384878	0.0212522	Gapdh1
FBgn0027794	-0.276746	0.386313	0.0214275	CG14786
FBgn0000084	-0.430006	0.386313	0.0215016	AnxB10
FBgn0015039	0.814234	0.386313	0.0215287	Cyp9b2
FBgn0034271	0.330359	0.386313	0.0215575	CG4996
FBgn0029924	-1.17844	0.386313	0.0216222	CG4586
FBgn0030613	2.17464	0.386313	0.0217604	Rab3-GEF
FBgn0011703	-0.401711	0.386313	0.0217871	RnrL
FBgn0015286	-0.374807	0.386313	0.0217897	Rala
FBgn0038746	-0.318942	0.386313	0.0218542	Surf6
FBgn0037974	-2.39851	0.386313	0.0219016	CG12224
FBgn0035989	0.333245	0.386313	0.0220071	CG3967
FBgn0033501	-1.51418	0.386313	0.0220175	CG12911
FBgn0033717	-0.315359	0.386313	0.022025	CG8839
FBgn0266041	-0.593052	0.386313	0.0220354	CR44806
FBgn0015924	-0.387395	0.386313	0.0220362	crq
FBgn0038925	-0.36153	0.386313	0.0220555	Cchl
FBgn0030003	-0.310532	0.386313	0.0221483	CG2116
FBgn0033644	0.883431	0.386313	0.0221528	Tret1-2
FBgn0266431	-0.854031	0.386313	0.0221735	CG45061
FBgn0260750	-0.283018	0.386313	0.0222004	Mulk
FBgn0039261	-0.273943	0.387119	0.0223051	CG6422
FBgn0036485	0.513426	0.387119	0.0223338	FucTA
FBgn0052055	-1.27167	0.38801	0.0224409	CG32055
FBgn0030028	1.46268	0.38801	0.0224882	Corp
FBgn0033434	-0.292218	0.38801	0.0225596	CG1902
FBgn0015801	0.492572	0.38801	0.022656	Reg-5
FBgn0033653	0.347418	0.38801	0.0226728	CG13192
FBgn0026409	-0.348036	0.38801	0.0226739	Mpcp
FBgn0040227	-0.287121	0.38801	0.0227151	eIF-3p66
FBgn0037632	-0.356066	0.38801	0.0228021	Tcp-1eta
FBgn0033128	1.12268	0.38801	0.0228177	Tsp42Eg
FBgn0035298	-0.388372	0.38801	0.0228224	SCOT
FBgn0039489	0.531989	0.38801	0.0228652	CG5880
FBgn0026418	-0.344987	0.389375	0.0229894	Hsc70Cb
FBgn0034117	-0.637573	0.389664	0.0230978	CG7997
FBgn0004888	-0.284632	0.389664	0.0231187	Scsalpha
FBgn0039250	-0.759124	0.389664	0.0231616	Mink
FBgn0034975	0.474607	0.389664	0.0231962	enok
FBgn0046214	-0.2795	0.389664	0.023282	vig2
FBgn0035679	-0.401885	0.389664	0.0233755	CG10467
FBgn0023096	1.05897	0.389664	0.0234571	btv
FBgn0033884	0.617411	0.389664	0.0234621	CG13344
FBgn0035767	1.69072	0.389664	0.0234658	CG8596
FBgn0010263	1.59217	0.389664	0.0235065	Rbp9
FBgn0034072	-0.357869	0.389664	0.0235455	Dg
FBgn0039927	0.887716	0.389664	0.0235689	CG11155
FBgn0267033	0.404524	0.389664	0.0236305	mamo
FBgn0051436	0.559189	0.389664	0.0236533	CG31436
FBgn0034985	1.96875	0.389664	0.0236638	CG3328
FBgn0001233	-0.745983	0.39047	0.0237568	Hsp83
FBgn0019925	-0.291202	0.39047	0.0238006	Surf4
FBgn0011211	-0.29718	0.390586	0.0239361	blw
FBgn0033979	-0.531245	0.390586	0.023987	Cyp6a19
FBgn0039475	2.60261	0.390586	0.0240003	CG6277
FBgn0033538	-0.508257	0.390586	0.0241187	CG11883
FBgn0040347	0.604535	0.390586	0.0241234	mus81
FBgn0036514	-0.388601	0.390586	0.0241337	CG12301
FBgn0036266	0.614908	0.390586	0.024139	CG5626
FBgn0033297	1.58714	0.390586	0.0241641	Mal-A8
FBgn0086448	0.400456	0.390586	0.024203	Gpi1
FBgn0030678	-0.530696	0.390898	0.0242853	CG11679
FBgn0023536	0.6998	0.390898	0.0243362	CG3156
FBgn0029588	0.572707	0.390898	0.024381	CG14798
FBgn0039326	0.974598	0.390898	0.0244407	CG10562
FBgn0037956	0.763628	0.390898	0.0244421	CG6959
FBgn0040823	2.13576	0.391263	0.0245323	dpr6
FBgn0085421	-0.491224	0.391263	0.0246624	Epac
FBgn0053087	0.554237	0.391263	0.0246714	LRP1
FBgn0036551	-0.697309	0.391263	0.0247132	CG17029
FBgn0039808	-1.44421	0.391263	0.0247292	CG12071
FBgn0034145	2.74583	0.391263	0.0247606	CG5065
FBgn0035336	-0.416951	0.391263	0.0248135	CG9004
FBgn0053978	1.51275	0.391263	0.0248217	CG33978
FBgn0086355	-0.30221	0.391263	0.024861	Tpi
FBgn0034694	0.319285	0.391658	0.0249301	CG6613
FBgn0026439	2.42087	0.393595	0.0250977	Eaat1
FBgn0037026	0.360315	0.394158	0.0252029	CG3634
FBgn0033485	-0.289158	0.394158	0.0252542	RpLP0-like
FBgn0263219	0.668586	0.394158	0.0252822	Dscam4
FBgn0037134	0.506315	0.394158	0.0253496	CG7407
FBgn0035244	-0.26722	0.394158	0.0253552	ABCB7
FBgn0037478	-0.418606	0.394503	0.0254217	CG2656
FBgn0036155	0.486193	0.395677	0.0255419	CG6163
FBgn0033195	0.871258	0.396103	0.0256572	CG1360
FBgn0038755	0.435508	0.396103	0.0256895	Hs6st
FBgn0015790	-0.320067	0.396103	0.0257031	Rab11
FBgn0028984	-0.733537	0.397517	0.0258611	Spn88Ea
FBgn0027572	0.421265	0.397517	0.0259071	CG5009
FBgn0261439	-0.292581	0.397517	0.0259295	SdhA
FBgn0083068	0.653817	0.397517	0.0260228	CG33947
FBgn0005655	-0.520647	0.397517	0.0260985	PCNA
FBgn0033224	-0.254664	0.397517	0.0261729	Nop17l
FBgn0050035	0.609172	0.397517	0.02619	Tret1-1
FBgn0266818	2.45622	0.397517	0.0262041	CR45280
FBgn0020294	1.796	0.397517	0.0262164	ko
FBgn0030509	1.31574	0.397517	0.0262573	CG11162
FBgn0003885	-0.33625	0.397517	0.0262866	alphaTub84D
FBgn0032919	-0.302379	0.398142	0.0263727	CG9253
FBgn0264744	0.693521	0.39903	0.0264763	CG44002
FBgn0032407	-0.284763	0.400582	0.0266244	Pex19
FBgn0015351	0.548155	0.400869	0.0266885	CG14906
FBgn0001977	0.26559	0.401619	0.0268368	CIAPIN1
FBgn0039955	-0.335953	0.401619	0.026936	CG41099
FBgn0027844	0.498345	0.401619	0.0269361	CAH1
FBgn0003062	-0.413647	0.401619	0.0269568	Fib
FBgn0039525	1.80305	0.401619	0.0269643	CG5646
FBgn0040765	-0.83927	0.402473	0.0270669	luna
FBgn0035094	0.865514	0.402739	0.0271301	CG9380
FBgn0261648	1.72833	0.403739	0.0272428	salm
FBgn0031322	0.342676	0.404365	0.0273636	CG5001
FBgn0024556	-0.306298	0.404365	0.0273837	EfTuM
FBgn0036316	-0.43936	0.404365	0.0274789	CG10960
FBgn0005666	2.27377	0.404365	0.0275972	bt
FBgn0030086	-0.30715	0.404365	0.0276091	CG7033
FBgn0032054	-0.403851	0.404365	0.0276643	CG13090
FBgn0033381	-0.55699	0.404365	0.0276758	GstE13
FBgn0000316	-0.336259	0.404365	0.0276982	cin
FBgn0023506	0.399235	0.404365	0.0277244	Es2
FBgn0002632	1.0995	0.404365	0.0277654	E(spl)m6-BFM
FBgn0038973	-1.01099	0.404365	0.0277853	Pebp1
FBgn0264727	1.40958	0.405656	0.0279806	CR43995
FBgn0036193	0.540899	0.405656	0.0279926	CG14135
FBgn0033342	-0.381589	0.405656	0.0280109	CG8258
FBgn0029942	0.589428	0.406185	0.0280931	CG2059
FBgn0263916	-0.333932	0.406223	0.0281414	Ent2
FBgn0003076	-0.282152	0.406813	0.0283026	Pgm
FBgn0037298	-0.26881	0.406813	0.0283617	CG2604
FBgn0010583	-0.370914	0.406813	0.028376	dock
FBgn0038922	-0.280565	0.406813	0.0284135	CG6439
FBgn0039966	0.44309	0.406813	0.0284568	Rab21
FBgn0263602	0.303109	0.406813	0.0284568	Taspase1
FBgn0026616	1.85024	0.40762	0.0285591	alpha-Man-IIb
FBgn0034258	-0.299521	0.407621	0.0286463	eIF3-S8
FBgn0027930	-0.583163	0.407621	0.0286941	MP1
FBgn0030756	1.36142	0.407621	0.0286967	CG9903
FBgn0017566	-0.291677	0.407631	0.0287761	ND75
FBgn0029823	-0.350792	0.407631	0.0287891	CG3011
FBgn0004363	-0.313487	0.407631	0.0288465	porin
FBgn0039600	-0.322026	0.407631	0.0288807	CG1646
FBgn0035064	-0.364924	0.408038	0.0289554	Aats-tyr-m
FBgn0034931	0.767311	0.410118	0.0291492	CG2812
FBgn0267722	0.70327	0.411337	0.0293761	CR46055
FBgn0001220	-0.366865	0.411337	0.0293774	Hsc70-5
FBgn0014861	-0.405767	0.411337	0.0294119	Mcm2
FBgn0029999	-0.407338	0.411337	0.029425	CG1575
FBgn0014269	0.331381	0.411337	0.0294671	prod
FBgn0035620	-2.33018	0.411385	0.0297348	CG5150
FBgn0030529	-0.30924	0.411385	0.0297719	Clic
FBgn0013765	0.482117	0.411385	0.029773	cnn
FBgn0032486	0.522303	0.411385	0.0298402	CG5705
FBgn0267455	1.19808	0.411385	0.0300457	CR45805
FBgn0023531	0.581305	0.411385	0.0300582	CG32809
FBgn0051431	-0.406287	0.411385	0.0300829	CG31431
FBgn0037439	-0.326055	0.411385	0.0301371	CG10286
FBgn0015789	-0.248331	0.411385	0.0301423	Rab10
FBgn0033479	0.574149	0.411385	0.0301475	CG2292
FBgn0042205	0.493925	0.411385	0.0301893	CG18764
FBgn0267766	-0.682953	0.411385	0.0301949	CR46097
FBgn0025456	0.766081	0.411385	0.0302512	CREG
FBgn0034172	0.323477	0.411385	0.0302904	CG6665
FBgn0001224	-1.67305	0.411385	0.0302936	Hsp23
FBgn0039474	2.66523	0.411385	0.0303513	CG6283
FBgn0038617	0.612859	0.411385	0.0303685	CG12333
FBgn0027786	-0.236837	0.411385	0.030413	Mtch
FBgn0030945	0.447376	0.411385	0.0304983	Ing3
FBgn0267711	-0.352381	0.411385	0.0305395	CR46044
FBgn0035557	0.64347	0.411385	0.030546	CG11353
FBgn0039183	-0.275866	0.411385	0.0306107	Dis3
FBgn0051301	-0.248475	0.411385	0.0306197	CG31301
FBgn0050044	1.9384	0.411385	0.0306993	s-cup
FBgn0028473	-0.371345	0.411385	0.0307296	Non1
FBgn0016041	-0.278169	0.411385	0.030759	Tom40
FBgn0267531	-0.568587	0.411385	0.0307611	CR45871
FBgn0001565	-0.298435	0.411385	0.0308173	Hlc
FBgn0034417	-0.262573	0.411385	0.0308265	CG15117
FBgn0051704	2.05682	0.411385	0.0309343	CG31704
FBgn0037850	1.35445	0.411385	0.0309395	CG14695
FBgn0032688	0.418927	0.411385	0.0309765	CG15160
FBgn0015553	0.580593	0.411385	0.0309973	tos
FBgn0010217	-0.301359	0.411806	0.0310753	ATPsyn-beta
FBgn0038815	0.780856	0.412796	0.0311964	CG5466
FBgn0028744	-0.25905	0.413719	0.0313127	CG5033
FBgn0003716	0.377707	0.414032	0.0314301	tkv
FBgn0031609	0.477653	0.414032	0.0314426	CG15443
FBgn0019650	1.67991	0.414032	0.0315611	toy
FBgn0035308	0.785973	0.414032	0.031629	CG15822
FBgn0039849	-0.241692	0.414032	0.0316378	CG11334
FBgn0000246	0.745325	0.414032	0.0317365	c(3)G
FBgn0040364	-0.492064	0.414032	0.0318798	CG11378
FBgn0037758	0.319534	0.414032	0.0319379	CG9467
FBgn0039461	0.663369	0.414032	0.0320063	CG5500
FBgn0051627	-1.6215	0.414032	0.0320085	CG31627
FBgn0262476	0.9585	0.414032	0.0321031	CG43066
FBgn0035926	1.25533	0.414032	0.0321335	CG5804
FBgn0261363	0.945796	0.414032	0.0321929	PPO3
FBgn0034634	0.566144	0.414032	0.0322324	CG10494
FBgn0037215	-0.306787	0.414032	0.0322752	CG12582
FBgn0262353	-0.43283	0.414032	0.0323197	CR43051
FBgn0022724	0.456991	0.414032	0.0323296	Taf8
FBgn0052650	-1.78565	0.414032	0.0323544	CG32650
FBgn0003448	0.995665	0.414032	0.032368	sna
FBgn0024179	0.434969	0.414032	0.0323765	wit
FBgn0052373	1.16642	0.414032	0.0323769	CG32373
FBgn0035471	-0.326796	0.414032	0.0323809	Sc2
FBgn0036738	-1.53424	0.414032	0.0324266	CG7542
FBgn0039310	1.46786	0.414032	0.0324934	CG11878
FBgn0062978	-0.948229	0.414032	0.0325005	CG31808
FBgn0036695	0.498392	0.414397	0.0325757	Papst2
FBgn0040299	0.272716	0.414813	0.0326551	Myo28B1
FBgn0028572	1.3598	0.414979	0.0327878	qtc
FBgn0039419	-0.318002	0.414979	0.0327933	CG12290
FBgn0003360	-0.30953	0.414979	0.0328082	sesB
FBgn0030327	0.350362	0.415821	0.0329674	FucT6
FBgn0024183	-0.296184	0.415821	0.0329859	vig
FBgn0030085	1.08417	0.415821	0.0330151	CG6999
FBgn0014870	-0.406941	0.416143	0.0330874	Psi
FBgn0001942	-0.323741	0.416868	0.0332352	eIF-4a
FBgn0034418	-0.291224	0.416868	0.0332388	CG15118
FBgn0026755	2.1244	0.416905	0.0333256	Ugt37b1
FBgn0032900	0.974796	0.416905	0.0333637	CG14401
FBgn0035238	0.35381	0.416905	0.0333984	CG12104
FBgn0027338	-0.251607	0.416905	0.033456	Kap-alpha3
FBgn0031118	0.443391	0.416905	0.0334762	RhoGAP19D
FBgn0035021	0.582003	0.416921	0.0335793	CG4622
FBgn0035154	1.66511	0.416921	0.0335834	CG3344
FBgn0032264	0.963059	0.416921	0.0336263	Lip4
FBgn0029766	0.336075	0.416921	0.033665	CG15784
FBgn0036762	-0.297399	0.420846	0.0340293	CG7430
FBgn0038704	0.408377	0.420971	0.0341262	CG5316
FBgn0086346	-0.282286	0.420971	0.0341341	ALiX
FBgn0243513	0.513873	0.421649	0.0342364	cnir
FBgn0031281	0.497056	0.42191	0.0343051	Saf6
FBgn0051233	-1.07055	0.423003	0.0344499	CG31233
FBgn0024958	-0.288739	0.423003	0.0344891	Irp-1A
FBgn0020616	0.302593	0.424292	0.0346419	SA
FBgn0028496	1.84326	0.425008	0.0347608	CG30116
FBgn0250906	-0.238745	0.425008	0.034841	Pgk
FBgn0030980	-2.41205	0.425008	0.0348807	CG7406
FBgn0026189	0.382766	0.425008	0.0349369	prominin-like
FBgn0005771	0.300073	0.425008	0.0349761	noc
FBgn0032298	-0.289402	0.425008	0.0350263	CG6724
FBgn0038601	-0.323299	0.425008	0.0350349	CG18600
FBgn0038391	0.225296	0.426542	0.0352371	GATAe
FBgn0034093	0.777112	0.426542	0.035267	CG15706
FBgn0029587	0.754053	0.426542	0.0353397	CG14797
FBgn0002924	-0.323022	0.426542	0.0353841	ncd
FBgn0030799	-0.488668	0.426542	0.0354013	CG4872
FBgn0266452	-0.336773	0.426805	0.0355442	CTPsyn
FBgn0000565	0.514296	0.426805	0.0355587	Eip71CD
FBgn0032153	0.741008	0.426805	0.0355853	CG4537
FBgn0031461	1.45062	0.426805	0.0357049	daw
FBgn0262511	-0.239024	0.426805	0.0357396	Vha44
FBgn0036771	0.424478	0.426805	0.0357398	CG14353
FBgn0052368	0.938848	0.426805	0.0357591	CG32368
FBgn0039911	-1.34009	0.42747	0.0358628	CG1909
FBgn0024320	-0.355403	0.429104	0.0361106	Npc1a
FBgn0000139	-0.319803	0.429104	0.0363106	ash2
FBgn0038428	-0.337462	0.429104	0.0363551	CG14894
FBgn0039081	1.08785	0.429104	0.0363654	Irk2
FBgn0041174	0.524036	0.429104	0.0364198	Vhl
FBgn0001079	0.331811	0.429104	0.0365974	fu
FBgn0026197	0.914739	0.429104	0.0366079	noe
FBgn0027552	-0.35661	0.429104	0.0367405	CG10863
FBgn0027601	0.680553	0.429104	0.0367805	pdgy
FBgn0036999	0.934174	0.429104	0.0367829	isoQC
FBgn0030067	-0.431256	0.429104	0.0367939	Rbm13
FBgn0042125	0.744446	0.429104	0.03686	CG18787
FBgn0267456	-0.519845	0.429104	0.0368693	CR45806
FBgn0039154	1.63977	0.429104	0.0368948	Npc2f
FBgn0032665	-0.634703	0.429104	0.0369182	CG15152
FBgn0023169	-0.272672	0.429104	0.0370066	AMPKalpha
FBgn0085408	0.388504	0.429104	0.0370217	Shroom
FBgn0262782	-0.361587	0.429104	0.0370419	Mdh1
FBgn0030813	0.742926	0.429104	0.0370433	CG4949
FBgn0036489	0.388215	0.429104	0.0370505	CG7011
FBgn0001142	-0.498125	0.429104	0.037101	Gs1
FBgn0262166	0.376233	0.429104	0.0372217	calypso
FBgn0050360	0.832487	0.429104	0.0372398	Mal-A6
FBgn0036152	0.63576	0.429104	0.0372497	CG6175
FBgn0036991	0.381874	0.429104	0.0372532	CG5872
FBgn0037448	2.07415	0.429104	0.0372708	CG15186
FBgn0033902	-0.30444	0.429104	0.0373165	Tango7
FBgn0010222	0.331728	0.429104	0.0373966	Nmdmc
FBgn0003654	-0.290892	0.429104	0.0373994	sw
FBgn0034976	0.53364	0.431898	0.0376915	CG4049
FBgn0035102	-0.478506	0.432012	0.0378541	CG7049
FBgn0035537	0.667602	0.432012	0.0378893	CG11342
FBgn0032787	-0.338789	0.432012	0.0379078	CG10195
FBgn0267552	0.388766	0.432012	0.0379727	CR45892
FBgn0013263	0.593306	0.432012	0.0380105	Trl
FBgn0034501	-0.555044	0.432012	0.0380464	CG13868
FBgn0032644	0.580953	0.432012	0.0380679	CG5131
FBgn0030321	-0.277031	0.432012	0.038096	CG1703
FBgn0010621	-0.356065	0.432012	0.0381387	Cct5
FBgn0039737	-0.381411	0.432013	0.0381874	CG7920
FBgn0031195	0.768145	0.432359	0.0382666	CG17600
FBgn0029088	0.334986	0.432896	0.0383973	disp
FBgn0040066	-0.362822	0.432896	0.0384356	wds
FBgn0035656	0.457361	0.432896	0.0385112	CG10479
FBgn0266750	0.538778	0.432896	0.0385854	CR45223
FBgn0039358	-0.262025	0.432896	0.0386311	CG5028
FBgn0016701	-0.277144	0.432896	0.0386363	Rab4
FBgn0033258	0.537008	0.432896	0.0386549	CG8712
FBgn0263351	-0.256534	0.433875	0.0387911	AP-2mu
FBgn0264542	0.760888	0.43493	0.0389629	CG43921
FBgn0030747	-0.252899	0.43493	0.0389833	CG4301
FBgn0267425	-0.329315	0.434948	0.0390338	CR45778
FBgn0034528	-0.366879	0.436161	0.0391917	CG11180
FBgn0043364	-0.424038	0.436836	0.0393015	cbt
FBgn0028341	-0.343622	0.440238	0.039657	l(1)G0232
FBgn0051102	0.891048	0.440323	0.0397142	CG31102
FBgn0010105	-0.56851	0.441455	0.039996	comm
FBgn0027090	-0.233732	0.441455	0.0399968	Aats-gln
FBgn0039291	0.621263	0.441455	0.0400065	CG13663
FBgn0031542	1.21931	0.441455	0.0400149	CG15414
FBgn0051451	1.95019	0.442834	0.0401917	CR31451
FBgn0038038	-0.29229	0.442834	0.0402395	CG5167
FBgn0027784	0.397109	0.444781	0.0404665	Prp18
FBgn0037184	0.373529	0.445146	0.0405497	CG14450
FBgn0004390	-0.334318	0.445633	0.0406442	RasGAP1
FBgn0034923	0.318383	0.446309	0.0407561	Upf3
FBgn0001296	-0.267171	0.44784	0.0409462	kar
FBgn0037529	-0.342934	0.45041	0.0412318	mRpS9
FBgn0082831	0.355499	0.451119	0.0413843	pps
FBgn0039674	-0.294773	0.451119	0.0414886	CG1907
FBgn0033454	-0.334233	0.451119	0.0415091	CG1671
FBgn0033302	0.532127	0.451119	0.0415833	Cyp6a14
FBgn0027343	1.3464	0.451119	0.0416862	fz3
FBgn0264863	1.82223	0.451119	0.0417091	CR44054
FBgn0000251	0.331426	0.451119	0.041776	cad
FBgn0250871	2.3148	0.451119	0.0418499	pot
FBgn0031453	0.283484	0.451119	0.0418613	Bacc
FBgn0051144	-0.42685	0.451119	0.0418623	CR31144
FBgn0034345	-0.225996	0.451119	0.0418675	CG5174
FBgn0013771	-0.337326	0.451119	0.0419055	Cyp6a9
FBgn0083027	-0.683321	0.452036	0.0420416	snoRNA:Psi18S-531
FBgn0024980	0.944328	0.452247	0.0421423	Syx4
FBgn0028658	0.452328	0.452247	0.0421629	adat
FBgn0029118	-0.356552	0.45268	0.0422893	Sucb
FBgn0027621	-0.401119	0.45268	0.0423051	Pfrx
FBgn0264959	-0.26391	0.452744	0.0424483	Src42A
FBgn0024957	-0.335279	0.452744	0.0425708	Irp-1B
FBgn0024509	-0.289006	0.452744	0.0425821	Sec13
FBgn0030237	-0.475	0.452744	0.0426003	CG15209
FBgn0037973	-0.595871	0.452744	0.0427412	CG18547
FBgn0086912	-0.345177	0.452744	0.0428681	mbm
FBgn0265053	0.747302	0.452744	0.042875	CR44168
FBgn0034924	1.89188	0.452744	0.0429622	CG17658
FBgn0030294	-0.375048	0.452744	0.0430614	Pa1
FBgn0027094	-0.248052	0.452744	0.0430666	Aats-ala
FBgn0016983	-0.207056	0.452744	0.0430815	smid
FBgn0001168	0.475504	0.452744	0.043106	h
FBgn0034389	-0.325458	0.452744	0.0431412	Mctp
FBgn0039635	-0.287525	0.452744	0.0431434	CG11876
FBgn0033225	-0.264271	0.452744	0.0431793	CG1550
FBgn0267022	0.593637	0.452744	0.0431827	CR45466
FBgn0032123	-0.4334	0.452744	0.0432089	Oatp30B
FBgn0013279	-1.93865	0.452744	0.0432275	Hsp70Bc
FBgn0028372	0.520415	0.453857	0.0434828	isopeptidase-T-3
FBgn0033984	0.331076	0.453857	0.0434861	Lap1
FBgn0037387	1.7971	0.453857	0.0435318	CG1213
FBgn0033627	0.696607	0.453857	0.043538	CG13204
FBgn0032329	-0.529631	0.454039	0.0436066	Art8
FBgn0036685	-0.270695	0.454174	0.0436842	CG6664
FBgn0003174	1.85389	0.454174	0.0437217	pwn
FBgn0025709	-2.99257	0.454211	0.0437763	CG8083
FBgn0020278	-0.377576	0.454471	0.043906	loco
FBgn0022382	0.679907	0.454471	0.0439351	Pka-R2
FBgn0039733	0.351108	0.454471	0.0439547	CG11504
FBgn0025352	-0.324132	0.454976	0.0441716	Thiolase
FBgn0038638	-0.353237	0.454976	0.0442225	CG7702
FBgn0024150	2.18381	0.454976	0.0442234	Ac78C
FBgn0029002	-0.24799	0.454976	0.0442968	miple2
FBgn0039266	-0.250658	0.454976	0.0443006	CG11791
FBgn0002891	0.506839	0.454976	0.0443105	mus205
FBgn0030878	-0.229189	0.455962	0.044503	CG6769
FBgn0030092	0.525186	0.455962	0.0445242	fh
FBgn0260004	0.69715	0.455962	0.044597	Snmp1
FBgn0036147	0.510521	0.455962	0.0446116	Plod
FBgn0029128	0.705868	0.457828	0.0448458	tyn
FBgn0034664	0.937397	0.457912	0.0449054	CG4377
FBgn0052695	1.04677	0.458175	0.0449827	CG32695
FBgn0037109	0.236263	0.458288	0.0450919	MED1
FBgn0029117	0.601012	0.458288	0.0450969	Surf1
FBgn0020238	-0.270565	0.458675	0.0451866	14-3-3epsilon
FBgn0262714	0.247365	0.459967	0.045381	Sap130
FBgn0027339	0.313154	0.459967	0.0455036	jim
FBgn0266644	0.348874	0.459967	0.0455818	CR45151
FBgn0037834	-0.269436	0.459967	0.045591	Art1
FBgn0029113	-0.240051	0.459967	0.0455958	Uba2
FBgn0243516	-0.481256	0.459967	0.0456488	Vrp1
FBgn0039205	0.635047	0.459967	0.045676	CG13623
FBgn0004367	0.488828	0.461364	0.0458666	mei-41
FBgn0023001	1.82372	0.462734	0.0460585	melt
FBgn0040660	-0.313926	0.462734	0.0461609	CG13551
FBgn0020618	-0.35244	0.462734	0.0461922	Rack1
FBgn0051390	0.382882	0.462734	0.046211	MED7
FBgn0034215	-0.382108	0.46286	0.0462756	Mtap
FBgn0036773	0.381541	0.463273	0.046369	CG13698
FBgn0035421	0.339521	0.46499	0.0465932	CG12034
FBgn0039118	-0.37935	0.465567	0.0467462	CG10208
FBgn0035947	-0.210344	0.465567	0.0467556	Srp68
FBgn0029937	-0.373441	0.466424	0.0468942	CG8300
FBgn0017545	-0.404088	0.467162	0.0470209	RpS3A
FBgn0262423	-1.16762	0.468963	0.0472549	mir-281-2
FBgn0030641	1.01473	0.46902	0.0473276	CG6299
FBgn0004456	-0.256867	0.46902	0.0473662	mew
FBgn0030310	1.93961	0.47117	0.0477867	PGRP-SA
FBgn0036546	0.267478	0.47117	0.0478337	elgi
FBgn0031948	-0.702558	0.47117	0.0479422	CG7149
FBgn0027553	0.359662	0.47117	0.0479675	NELF-B
FBgn0039711	0.348295	0.47117	0.0479703	CG7824
FBgn0039304	-0.278558	0.47117	0.047989	CG10425
FBgn0053144	0.336586	0.47117	0.0480491	CG33144
FBgn0260388	-0.529569	0.47117	0.0480845	CG42514
FBgn0267487	-0.238827	0.47117	0.0481068	Ptp61F
FBgn0028336	-0.248118	0.47117	0.0481232	l(1)G0255
FBgn0031168	0.782881	0.47117	0.0481662	CG1722
FBgn0023171	-0.292786	0.471851	0.04833	rnh1
FBgn0003041	0.497362	0.471851	0.0483522	pbl
FBgn0032729	-0.45488	0.471851	0.048395	CG10639
FBgn0034933	0.325475	0.472444	0.0485089	CG3735
FBgn0019644	-0.26877	0.472815	0.0486002	ATPsyn-b
FBgn0037891	-0.282072	0.474062	0.0487817	CG5214
FBgn0262734	-0.315739	0.47474	0.0489049	Rbp2
FBgn0031876	0.576518	0.479333	0.0494319	Atac1
FBgn0027291	-0.224713	0.48051	0.0496073	l(1)G0156
FBgn0085434	-0.278517	0.481267	0.0497877	NaCP60E
FBgn0030151	-0.328731	0.481267	0.0497937	CG1354
FBgn0051935	0.369083	0.482831	0.0500098	CG31935
FBgn0024909	0.448489	0.48433	0.0502196	Taf7
FBgn0029148	-0.422973	0.484813	0.0503241	NHP2
FBgn0033853	-0.284268	0.487076	0.0506588	CG6145
FBgn0031897	0.374654	0.487076	0.0507337	CG13784
FBgn0010909	-0.318873	0.487076	0.0507781	msn
FBgn0034114	0.347069	0.487076	0.0507782	CG4282
FBgn0259245	2.34949	0.487365	0.0509395	CG42343
FBgn0030752	-0.28794	0.487365	0.0509438	CG9947
FBgn0010341	-0.290109	0.487365	0.0509937	Cdc42
FBgn0037741	-0.292985	0.487365	0.0511404	CG16908
FBgn0264556	1.02587	0.487365	0.0513091	Gr39a
FBgn0039537	-0.260719	0.487365	0.0513223	CG5590
FBgn0031284	0.454674	0.487365	0.0514244	CG3876
FBgn0024986	-0.452842	0.487365	0.0514674	CG3719
FBgn0263776	-0.451484	0.487365	0.0516228	CG43693
FBgn0032833	-0.35889	0.487365	0.0516443	CoIV
FBgn0263200	-0.302189	0.487365	0.0516519	Galt
FBgn0027619	-0.2682	0.487365	0.0517188	Adam
FBgn0040342	1.11957	0.487365	0.0517553	CG3706
FBgn0034084	0.320983	0.487365	0.0518136	CG8435
FBgn0017418	0.273715	0.487365	0.051828	ari-1
FBgn0039929	-0.266906	0.487365	0.0518544	CG11076
FBgn0031317	0.282778	0.487365	0.051881	CG5118
FBgn0034075	1.37662	0.487365	0.0519174	Asph
FBgn0035207	-0.241061	0.487365	0.0519532	CG9153
FBgn0086450	-0.827933	0.487365	0.0519622	su(r)
FBgn0039099	0.797871	0.487365	0.0520701	GILT2
FBgn0032156	-0.329707	0.487365	0.0521014	CG13124
FBgn0039932	0.675088	0.487365	0.0522869	fuss
FBgn0035498	-0.283193	0.487365	0.0523155	Fit1
FBgn0036640	0.462029	0.487365	0.0523524	nxf2
FBgn0042085	0.28962	0.487365	0.0523754	Bap170
FBgn0036286	0.281033	0.487365	0.0523934	CG10616
FBgn0031745	-0.457263	0.487365	0.0524802	rau
FBgn0001285	2.03976	0.487365	0.052495	Jon44E
FBgn0004133	0.594597	0.487365	0.0526126	blow
FBgn0035505	1.80121	0.487365	0.0526183	Teh2
FBgn0002989	-0.353551	0.487365	0.052643	okr
FBgn0038804	0.310373	0.487365	0.052675	CG10877
FBgn0033134	-0.271762	0.487365	0.0527048	Tsp42El
FBgn0033871	0.493712	0.487365	0.0528029	CG13339
FBgn0004368	0.426654	0.487365	0.0528212	Ptp4E
FBgn0003676	-0.317961	0.487365	0.0528362	T-cp1
FBgn0029990	1.7812	0.487757	0.0529356	CG2233
FBgn0260866	0.35299	0.487757	0.0530274	dnr1
FBgn0043457	0.306141	0.487757	0.0531317	CG5180
FBgn0047178	-0.45021	0.487757	0.0532613	CG32147
FBgn0016792	0.275841	0.487757	0.0532622	dmt
FBgn0039068	0.494012	0.487757	0.053323	CG13827
FBgn0039347	1.59364	0.487757	0.0533472	CG5071
FBgn0052027	0.647449	0.487757	0.0533549	CR32027
FBgn0034214	-0.372921	0.487757	0.053415	CG6550
FBgn0265380	-0.301646	0.487757	0.0534272	CR44321
FBgn0003079	0.277774	0.488047	0.053514	phl
FBgn0053460	1.70122	0.489366	0.0537135	CG33460
FBgn0041723	0.836538	0.489777	0.0538806	rho-5
FBgn0265174	-0.336934	0.489777	0.0539112	PIG-V
FBgn0031496	2.4358	0.489777	0.053933	CG17258
FBgn0030077	-0.793731	0.489777	0.0540489	CG15365
FBgn0038961	-0.325042	0.489777	0.0540999	CG13850
FBgn0050403	1.2845	0.489777	0.0542121	CG30403
FBgn0031307	0.615062	0.489777	0.0542515	MFS3
FBgn0035761	-0.303199	0.489777	0.0543282	RhoGEF4
FBgn0031456	0.433717	0.489777	0.0543366	Trn-SR
FBgn0020764	-0.264393	0.489777	0.0544373	Alas
FBgn0036008	0.319948	0.489777	0.0545454	CG3408
FBgn0033019	0.494916	0.489777	0.0545756	CG10395
FBgn0037556	0.271791	0.489777	0.0545864	CG9636
FBgn0266428	0.425491	0.489777	0.0546001	CR43463
FBgn0020906	-2.06164	0.489777	0.054614	Jon25Bi
FBgn0035524	-0.281642	0.489777	0.0546725	CG11583
FBgn0025117	-0.277198	0.489777	0.0546951	und
FBgn0033960	2.47493	0.489837	0.0547569	CG10151
FBgn0031008	-0.252046	0.490219	0.0549414	CG8010
FBgn0041630	-0.282324	0.490219	0.0550585	Hexo1
FBgn0034087	-0.278696	0.490219	0.0551076	clu
FBgn0028387	0.357529	0.490219	0.0551508	chm
FBgn0037712	-1.12067	0.490219	0.0552168	CG16789
FBgn0000054	0.694587	0.490219	0.0552273	Adf1
FBgn0263005	-0.32215	0.490219	0.0552967	CG43313
FBgn0034452	1.80768	0.490219	0.0553651	Oseg6
FBgn0036819	-1.86739	0.490219	0.0553698	Dysb
FBgn0040551	0.66507	0.490219	0.0553979	CG11686
FBgn0039828	-0.315425	0.490219	0.0554059	CG1542
FBgn0266570	-0.341581	0.490791	0.0556313	CG2982
FBgn0029523	0.476957	0.490791	0.0556351	CR18275
FBgn0264975	-0.38205	0.490791	0.0556363	Nrg
FBgn0052082	1.71088	0.492024	0.0558313	CG32082
FBgn0261801	0.482225	0.492288	0.0559166	CG42747
FBgn0033160	-0.248122	0.494507	0.0562752	CG11107
FBgn0265668	1.92484	0.494507	0.0562799	CG44475
FBgn0265044	1.093	0.495551	0.0564545	CR44161
FBgn0029941	-0.314918	0.495621	0.0565511	CG1677
FBgn0261564	-0.237508	0.495621	0.0565739	CG42678
FBgn0039734	2.15721	0.496285	0.05678	Tace
FBgn0261794	-0.325982	0.496285	0.0567991	kcc
FBgn0265178	-0.753795	0.496285	0.056828	CG44243
FBgn0032720	-0.327092	0.496285	0.056873	mRpL13
FBgn0260743	0.389459	0.496967	0.0570338	GC1
FBgn0039486	1.70423	0.496967	0.0570628	CG6074
FBgn0036365	0.385446	0.497019	0.0571248	CG10732
FBgn0038042	0.977266	0.498763	0.0573813	Scgbeta
FBgn0010551	-0.276405	0.498919	0.0574931	Phb2
FBgn0028670	-0.328754	0.498919	0.0575209	Vha100-2
FBgn0039740	0.493298	0.498919	0.0576059	CG7928
FBgn0038056	-0.26263	0.498919	0.0576236	CG5961
FBgn0037980	0.396005	0.498969	0.0576856	CG3313
FBgn0034961	0.313497	0.499596	0.0578256	CG3163
FBgn0033859	0.205435	0.499596	0.0578704	fand
FBgn0029879	1.81306	0.4997	0.0579387	APC7
FBgn0004507	-0.246368	0.500327	0.0580677	GlyP
FBgn0262598	-1.64539	0.500674	0.0581643	mtsh
FBgn0004055	0.569649	0.500967	0.0582546	uzip
FBgn0010235	-0.295446	0.501015	0.0583165	Klc
FBgn0020910	-0.40518	0.501077	0.0583801	RpL3
FBgn0037809	0.956392	0.501291	0.0584614	CG12818
FBgn0261284	1.13958	0.501373	0.0585666	bou
FBgn0033996	0.478018	0.501373	0.058636	CG11807
FBgn0032130	0.573721	0.501373	0.0586554	CG3838
FBgn0039156	-0.285226	0.501373	0.0587687	CG6178
FBgn0036305	0.255704	0.501373	0.058781	CG10984
FBgn0029831	1.642	0.501373	0.0588093	CG5966
FBgn0038984	-0.224826	0.502576	0.0590069	AdipoR
FBgn0029756	0.45604	0.502975	0.0591103	CG3309
FBgn0260756	0.323709	0.503514	0.0592988	CG42554
FBgn0260481	1.32928	0.503514	0.0593985	CG32454
FBgn0039290	-0.743597	0.503514	0.0594479	CG13654
FBgn0085405	-0.327753	0.503514	0.059461	CG34376
FBgn0038306	-0.441664	0.503514	0.0594987	Art3
FBgn0267795	-0.37501	0.503514	0.0595247	CG32138
FBgn0262955	0.23899	0.503514	0.0595701	RpII140
FBgn0053288	0.430235	0.50355	0.0596309	CG33288
FBgn0031214	0.796505	0.504572	0.0598087	CG11374
FBgn0020655	0.239331	0.505278	0.0599492	ArfGAP1
FBgn0035473	-0.220114	0.505597	0.060044	mge
FBgn0000559	-0.233092	0.505833	0.0601289	EF2
FBgn0031883	-0.21037	0.505888	0.0601922	Caper
FBgn0063494	0.612743	0.505889	0.0602493	GstE6
FBgn0002887	0.584601	0.506252	0.0603495	mus201
FBgn0052227	2.09027	0.506597	0.0604917	gogo
FBgn0037166	1.72116	0.506597	0.0605129	CG11426
FBgn0035600	-0.299565	0.506597	0.0605614	CG4769
FBgn0039381	0.394419	0.506767	0.0606407	SppL
FBgn0052418	-0.345959	0.506767	0.0606958	vito
FBgn0033631	0.608188	0.507226	0.0608749	Sod3
FBgn0000996	-0.330392	0.507226	0.0609266	dup
FBgn0033292	0.5916	0.507226	0.0610226	Cyp4ad1
FBgn0039977	0.249504	0.507226	0.0610422	CG17454
FBgn0031995	-0.247644	0.507226	0.0610704	CG8475
FBgn0052791	0.512562	0.507226	0.0610931	CG32791
FBgn0036557	-0.293118	0.50727	0.0611553	mRpS31
FBgn0030757	1.68601	0.507563	0.0612477	CG9902
FBgn0261573	-0.263577	0.508033	0.0615502	CoRest
FBgn0033304	-0.301467	0.508033	0.0615701	Cyp6a13
FBgn0030466	0.330766	0.508033	0.0616131	CG15744
FBgn0015527	-0.244439	0.508033	0.0616334	pen
FBgn0034970	-0.265976	0.508033	0.0616356	yki
FBgn0053169	1.24558	0.508033	0.0616473	CG33169
FBgn0261276	-0.229077	0.508514	0.0617629	Opa1
FBgn0020633	-0.438547	0.508905	0.0618934	Mcm7
FBgn0031315	0.519645	0.508905	0.0619983	CG14341
FBgn0030764	-1.39471	0.508905	0.0620129	CG9777
FBgn0087040	-1.07995	0.508905	0.0620479	alphaTub67C
FBgn0086683	0.205202	0.508905	0.0621667	Spf45
FBgn0025682	0.399818	0.508905	0.0623135	scf
FBgn0031945	1.4133	0.508905	0.0623561	CG7191
FBgn0011570	-0.22335	0.508905	0.0623592	cpb
FBgn0033101	-0.24201	0.508905	0.0623834	CG9436
FBgn0004636	-0.258951	0.508905	0.0624609	R
FBgn0038536	-0.30851	0.508905	0.0624705	CG7655
FBgn0052647	1.68528	0.508905	0.0625128	CG32647
FBgn0034803	0.374917	0.508905	0.0625543	CG9849
FBgn0030731	-0.264011	0.50906	0.0626306	Mfe2
FBgn0260972	-0.279821	0.509972	0.0628568	alc
FBgn0025582	-0.323886	0.509972	0.0628576	Int6
FBgn0034179	0.735516	0.510106	0.0629315	CG6805
FBgn0030270	1.48815	0.510323	0.0630156	CG15199
FBgn0250837	-0.286829	0.511511	0.0632757	dUTPase
FBgn0000404	-0.247494	0.511511	0.0632773	CycA
FBgn0033564	0.441758	0.511923	0.0633859	Pex6
FBgn0038953	0.375094	0.512526	0.0635182	CG18596
FBgn0267736	-0.310192	0.51255	0.063607	CR46067
FBgn0024230	0.343642	0.51255	0.0637217	Hs2st
FBgn0053172	0.622807	0.51255	0.0637333	CG33172
FBgn0037900	0.316224	0.51255	0.0638921	CG5276
FBgn0027518	0.318513	0.51255	0.0639559	CG7609
FBgn0038396	0.442538	0.51255	0.06402	CG5013
FBgn0015805	-0.328639	0.51255	0.0640373	Rpd3
FBgn0030719	-0.231253	0.51255	0.0640709	eIF5
FBgn0035124	-2.14353	0.51255	0.0640968	ttm2
FBgn0039941	0.733902	0.51255	0.0642099	CG17167
FBgn0037363	0.338095	0.51255	0.0642347	Atg17
FBgn0263930	0.330112	0.51255	0.0642545	dally
FBgn0027903	-0.465081	0.51255	0.0642705	CG12018
FBgn0261955	-0.259213	0.512985	0.0643827	kdn
FBgn0030686	-0.312653	0.513277	0.0644772	mRpL3
FBgn0033392	0.408655	0.514315	0.0646654	CG8027
FBgn0037000	1.23302	0.514476	0.0647551	ZnT77C
FBgn0034053	-2.10863	0.514476	0.0648267	Cyp4aa1
FBgn0004047	-1.64713	0.514476	0.0648592	Yp3
FBgn0027580	-0.344702	0.514868	0.0649664	CG1516
FBgn0039043	0.9633	0.514932	0.0650488	CG17121
FBgn0030574	1.06006	0.514932	0.065121	CG9413
FBgn0036410	2.05013	0.514932	0.0651483	CG8100
FBgn0031678	0.474679	0.515433	0.0652697	CG31918
FBgn0000405	-0.34678	0.51547	0.0653822	CycB
FBgn0035228	-0.254319	0.51547	0.0654475	CG12091
FBgn0010292	-0.293136	0.51547	0.0655153	bys
FBgn0028424	0.417228	0.51547	0.065629	JhI-26
FBgn0031398	0.347639	0.51547	0.0656295	CG10880
FBgn0050392	0.327134	0.51547	0.065674	CG30392
FBgn0010014	1.33405	0.51547	0.0656801	CanB
FBgn0025885	-0.322394	0.515689	0.065766	Inos
FBgn0031476	1.11846	0.516537	0.0659589	CG8813
FBgn0032488	0.267599	0.516537	0.0660149	CG16812
FBgn0053100	-0.24258	0.516537	0.0660484	4EHP
FBgn0033785	1.28171	0.517063	0.0661738	Sans
FBgn0033879	-0.244217	0.518557	0.0664654	CG6543
FBgn0050154	-0.525545	0.518557	0.0664817	CG30154
FBgn0039044	0.702968	0.518911	0.0665854	p53
FBgn0015577	-0.310517	0.519232	0.0667696	alpha-Est9
FBgn0035518	0.464641	0.519232	0.0667839	CG15011
FBgn0030638	0.661721	0.519232	0.0668018	CG11655
FBgn0053985	0.915159	0.520555	0.0671165	CG33985
FBgn0011742	-0.266909	0.520555	0.0672291	Arp2
FBgn0015575	0.717226	0.520555	0.0672538	alpha-Est7
FBgn0037307	1.75266	0.520555	0.0673312	Tim17a2
FBgn0010339	-0.322479	0.520555	0.0673981	128up
FBgn0036837	0.625416	0.520555	0.0674237	CG18135
FBgn0035121	-0.344613	0.520555	0.0674243	Tudor-SN
FBgn0031652	0.351428	0.520555	0.0674535	jet
FBgn0035870	-1.41628	0.520555	0.0676776	Gr66a
FBgn0033749	0.385684	0.520555	0.0676857	achi
FBgn0026634	-0.233766	0.520555	0.0677351	ldlCp
FBgn0022709	0.465733	0.520555	0.0677813	Adk1
FBgn0035829	-0.529493	0.520555	0.0677865	HP4
FBgn0032251	0.460308	0.520555	0.0677915	Nse4
FBgn0022213	-0.219798	0.522376	0.0680874	Cas
FBgn0028369	0.650473	0.522508	0.0681634	kirre
FBgn0032899	0.830825	0.52254	0.0682263	CG9338
FBgn0025629	-0.249495	0.522761	0.0683569	CG4045
FBgn0037368	0.607083	0.522761	0.0683728	CG1239
FBgn0026573	0.513013	0.523541	0.0685338	ADD1
FBgn0037906	0.420416	0.523647	0.0687158	PGRP-LB
FBgn0031736	-0.329542	0.523647	0.0687355	CG11030
FBgn0031675	-0.46473	0.523647	0.0687941	CG9121
FBgn0264087	0.886447	0.523647	0.0688282	Slob
FBgn0267002	0.497539	0.523647	0.0690247	unc-104
FBgn0030170	0.969878	0.523647	0.0690311	CG2990
FBgn0265873	1.10568	0.523647	0.0691126	CR44662
FBgn0265042	0.325891	0.523647	0.0692807	Irk1
FBgn0023549	-0.340285	0.523647	0.0692939	Mct1
FBgn0262112	-1.29943	0.523647	0.0693404	sro
FBgn0037697	1.74145	0.523647	0.0693673	GstZ2
FBgn0265274	-0.209331	0.523647	0.0693867	Inx3
FBgn0265810	0.626541	0.523647	0.0693869	CR44599
FBgn0004462	0.230274	0.523647	0.0693906	Pk17E
FBgn0027108	0.554085	0.523647	0.0694309	Inx2
FBgn0034494	-0.436549	0.524078	0.0695908	CG10444
FBgn0265590	0.434956	0.524078	0.0696059	CR44417
FBgn0016762	-0.344986	0.524402	0.0697079	angel
FBgn0015393	-0.322958	0.525052	0.0698786	hoip
FBgn0039101	-1.53818	0.525052	0.0699702	CG16710
FBgn0034247	0.964529	0.525052	0.0699715	CG6484
FBgn0261588	0.690855	0.525829	0.0701777	pdm3
FBgn0037262	-0.226132	0.525829	0.0702841	MED31
FBgn0035206	-0.217656	0.525829	0.0703152	CG9186
FBgn0010741	-0.309884	0.525829	0.0704249	l(3)01239
FBgn0261885	0.429659	0.525829	0.0704459	osa
FBgn0038790	1.27907	0.525829	0.0706054	MtnC
FBgn0022069	-0.231716	0.525829	0.0706185	Nnp-1
FBgn0036242	2.4113	0.525829	0.0706696	CG6793
FBgn0031449	-0.265515	0.525829	0.0706812	CG31689
FBgn0037174	0.8368	0.525829	0.0707505	CG14457
FBgn0020389	-0.220271	0.525829	0.0707515	Papss
FBgn0029506	0.877333	0.525829	0.0707847	Tsp42Ee
FBgn0036402	-0.211508	0.526178	0.0708909	CG6650
FBgn0030452	-0.717761	0.527149	0.0710809	MFS10
FBgn0001991	1.96001	0.5275	0.0712439	Ca-alpha1D
FBgn0025621	-0.207418	0.5275	0.0712727	CG16989
FBgn0003969	-0.21842	0.5275	0.071319	vap
FBgn0036121	-0.51916	0.5275	0.0715016	CG6310
FBgn0265819	-1.55885	0.5275	0.0715552	CR44608
FBgn0026438	1.3856	0.5275	0.0716015	Eaat2
FBgn0037728	-0.212815	0.5275	0.0716203	CG16817
FBgn0032857	1.62538	0.5275	0.0716856	CG10947
FBgn0014141	-0.423775	0.5275	0.0717159	cher
FBgn0032848	-0.568846	0.5275	0.0717215	nesd
FBgn0010651	0.301235	0.527584	0.0718484	l(2)08717
FBgn0030100	0.41029	0.527584	0.0719042	CG12106
FBgn0011692	-0.578337	0.527584	0.0719109	pav
FBgn0011768	-0.298699	0.527672	0.0720226	Fdh
FBgn0266417	-0.424831	0.527672	0.0720416	CG45057
FBgn0036165	-0.280811	0.528402	0.0722006	chrb
FBgn0029826	-0.648858	0.528824	0.0723177	CG6041
FBgn0027795	-0.502314	0.529478	0.0724667	CG14785
FBgn0040349	1.56569	0.529516	0.0725315	CG3699
FBgn0033735	-0.259767	0.53142	0.0728521	CG8525
FBgn0000043	-0.326919	0.531929	0.0730617	Act42A
FBgn0262716	-0.285744	0.531929	0.0731457	Arp3
FBgn0036522	0.503868	0.531929	0.0731926	CG7372
FBgn0027088	-0.20237	0.531929	0.0732202	Aats-gly
FBgn0028978	0.346191	0.531929	0.0732605	trbl
FBgn0024432	-0.244001	0.531929	0.073316	Dlc90F
FBgn0034141	-0.303321	0.531929	0.0733406	CG8311
FBgn0036847	0.430593	0.532475	0.0734758	CG11577
FBgn0020270	-0.200469	0.533067	0.0736174	mre11
FBgn0085450	0.382868	0.534165	0.0738292	Snoo
FBgn0024194	-0.289525	0.53523	0.0740365	rasp
FBgn0039449	0.582095	0.535338	0.0741212	CG6425
FBgn0011284	-0.387843	0.535338	0.0741719	RpS4
FBgn0032763	0.855747	0.535386	0.0742388	CG17568
FBgn0039767	-0.182542	0.536029	0.0744062	CG2218
FBgn0085427	1.1303	0.536029	0.0744484	CG34398
FBgn0004595	0.698153	0.536597	0.0746151	pros
FBgn0029914	0.243058	0.536597	0.0746481	CG4558
FBgn0053092	0.617554	0.536795	0.074736	P5CDh2
FBgn0035710	0.396433	0.5368	0.0748633	SP1173
FBgn0031676	-0.386566	0.5368	0.0749451	CG14040
FBgn0032646	-0.256791	0.5368	0.0749725	CG6412
FBgn0264862	0.596491	0.5368	0.0750284	CR44053
FBgn0031356	-0.271469	0.5368	0.0750385	CG17660
FBgn0013718	-0.323757	0.536994	0.075126	nuf
FBgn0260477	-0.348275	0.537464	0.0753085	CG30283
FBgn0053468	1.23887	0.537464	0.0753126	CG33468
FBgn0026315	0.266605	0.538111	0.0755105	Ugt35a
FBgn0051041	1.32289	0.538111	0.0755864	CG31041
FBgn0030645	0.376808	0.538111	0.0756312	CG6308
FBgn0014020	-0.198866	0.538111	0.0757573	Rho1
FBgn0029986	1.93148	0.538111	0.0758416	CG15332
FBgn0035203	-0.268192	0.538111	0.0758944	CG9149
FBgn0261983	-0.207458	0.538111	0.0759102	l(2)gd1
FBgn0030676	0.476861	0.538111	0.0759861	CG12379
FBgn0037312	0.383793	0.538111	0.0760154	CG11999
FBgn0039760	2.83913	0.538111	0.0760764	CG9682
FBgn0013548	0.401902	0.538111	0.0761354	l(2)dtl
FBgn0052056	-0.269277	0.538111	0.0761822	scramb1
FBgn0264855	-0.26041	0.538111	0.07619	AP-2alpha
FBgn0001257	-0.464689	0.539512	0.0764727	ImpL2
FBgn0011741	-0.248993	0.539512	0.0765097	Arp6
FBgn0022359	1.36458	0.53963	0.0765872	Sodh-2
FBgn0036075	-2.40278	0.539781	0.0766692	CG8065
FBgn0038853	0.273515	0.54115	0.0770415	RhoGAP93B
FBgn0039882	-0.321274	0.54115	0.0771448	CG11576
FBgn0261881	0.433906	0.54115	0.0771545	l(2)35Be
FBgn0062412	0.694151	0.54115	0.0771917	Ctr1B
FBgn0037022	0.411642	0.54115	0.077194	CG11396
FBgn0030478	-0.287684	0.54115	0.0772314	CG1640
FBgn0026326	0.327488	0.54115	0.0773127	Mad1
FBgn0038742	-0.238844	0.54115	0.0774067	Arc42
FBgn0033584	-0.29416	0.54115	0.0776369	CG7737
FBgn0037566	-0.214733	0.54115	0.0777579	mRpL1
FBgn0039890	-0.210754	0.54115	0.0777676	CG2316
FBgn0031820	0.375627	0.54115	0.0777837	DLP
FBgn0050484	1.16562	0.54115	0.0778195	CG30484
FBgn0015834	-0.264771	0.54115	0.0778465	Trip1
FBgn0050159	-0.233207	0.54115	0.0778781	CG30159
FBgn0000455	-0.249167	0.54115	0.0779915	Dip-C
FBgn0050349	-0.300025	0.54115	0.0780025	CG30349
FBgn0039240	0.232912	0.54115	0.0780173	CG3744
FBgn0037098	0.345673	0.54115	0.0780893	Wnk
FBgn0263773	0.307327	0.54115	0.0781586	fok
FBgn0038547	-0.804104	0.54115	0.0781703	CG17803
FBgn0010213	-0.235138	0.54115	0.078235	Sod2
FBgn0034639	0.395967	0.54115	0.0782634	CG15673
FBgn0032839	1.68744	0.541939	0.0784616	CG10659
FBgn0033733	-1.16089	0.541939	0.0784994	CG8834
FBgn0004435	-0.241646	0.542266	0.0786079	Galphaq
FBgn0003328	-0.306005	0.543016	0.0787833	scb
FBgn0054026	1.9671	0.543016	0.078869	CG34026
FBgn0039727	0.420059	0.543016	0.0788997	CG15523
FBgn0026582	0.485329	0.543036	0.0790287	Hmg-2
FBgn0036192	0.410357	0.543036	0.0790578	Pallidin
FBgn0011740	0.403764	0.543036	0.0790858	alpha-Man-II
FBgn0013531	0.439424	0.5432	0.0791709	MED20
FBgn0029943	-0.247007	0.543325	0.0792502	Atg5
FBgn0051800	-0.295768	0.543453	0.0794454	CG31800
FBgn0015288	-0.362972	0.543453	0.079455	RpL22
FBgn0010380	-0.205103	0.543453	0.079526	AP-1-2beta
FBgn0052476	-0.242147	0.543453	0.0796027	mthl14
FBgn0038947	-0.250961	0.543453	0.0796205	Sar1
FBgn0085298	1.11378	0.543453	0.0796613	CG34269
FBgn0263981	0.530213	0.543453	0.0796967	CR43730
FBgn0051875	0.675004	0.543592	0.0798409	CG31875
FBgn0004860	0.467065	0.543592	0.079932	ph-d
FBgn0035088	-0.263328	0.543592	0.0799886	CG3776
FBgn0013275	-0.703787	0.543592	0.0800379	Hsp70Aa
FBgn0028509	-0.252887	0.543592	0.0801377	CenG1A
FBgn0017430	0.387809	0.543592	0.0801389	Nelf-E
FBgn0034356	0.778526	0.543592	0.0802039	CG10924
FBgn0037003	1.05465	0.543592	0.0802061	CG18281
FBgn0032200	-0.266024	0.543715	0.0802943	CG5676
FBgn0036620	-2.91013	0.543715	0.0804754	CG4842
FBgn0034217	1.17086	0.543715	0.0804942	Lhr
FBgn0036194	-0.563116	0.543715	0.0805089	CG11652
FBgn0035499	-0.243655	0.543715	0.0805733	Chd64
FBgn0019960	-0.252073	0.543715	0.0806278	CG6455
FBgn0086408	0.630172	0.543715	0.0806523	stl
FBgn0086708	-0.31606	0.544775	0.0808799	stv
FBgn0264713	0.402839	0.544775	0.0809353	CR43981
FBgn0039644	0.65241	0.544775	0.081001	CG11897
FBgn0014133	-0.250189	0.544775	0.0810545	bif
FBgn0035166	0.247346	0.545306	0.0811949	CG13902
FBgn0000566	-0.307928	0.546395	0.0815037	Eip55E
FBgn0031776	-0.373051	0.546395	0.0815772	CG13993
FBgn0034379	0.366542	0.546395	0.0816942	CG15073
FBgn0031817	0.475559	0.546395	0.0817262	CG9531
FBgn0032775	-0.22091	0.546395	0.0817453	CG17544
FBgn0036749	-0.408815	0.546395	0.0817645	CG7460
FBgn0030612	-0.292177	0.546395	0.0817872	CG5599
FBgn0031684	-0.291127	0.547412	0.082001	CG8680
FBgn0051075	-0.53863	0.547996	0.0821501	CG31075
FBgn0267762	0.47064	0.548518	0.0822901	CR46093
FBgn0259151	1.57345	0.548624	0.0824153	CG42266
FBgn0014863	1.74365	0.548624	0.0824759	Mlp84B
FBgn0033296	1.27689	0.548624	0.0824911	Mal-A7
FBgn0036752	-0.262484	0.548893	0.0825932	Adgf-A
FBgn0040321	-2.91633	0.548915	0.0826678	GNBP3
FBgn0035132	-0.197328	0.548915	0.0827899	mthl10
FBgn0034312	0.245092	0.548915	0.0827959	CG10916
FBgn0001092	-0.235	0.548915	0.0829275	Gapdh2
FBgn0266657	0.354458	0.548915	0.0830043	CR45164
FBgn0034063	0.319926	0.548915	0.0830234	CG8389
FBgn0031544	0.229529	0.548915	0.0830328	CG17593
FBgn0086444	0.289674	0.548915	0.0830903	l(2)37Cb
FBgn0026602	0.255493	0.549557	0.0832681	Ady43A
FBgn0032408	-0.250586	0.549557	0.0833112	CG6712
FBgn0029736	-0.183215	0.550217	0.0835144	CG4041
FBgn0004106	-0.39439	0.550217	0.083535	Cdk1
FBgn0040236	0.359268	0.551144	0.0837777	c11.1
FBgn0264821	0.381362	0.551144	0.0837997	CR44029
FBgn0032819	0.250519	0.551393	0.0839561	CG10463
FBgn0000024	1.6144	0.551393	0.0839615	Ace
FBgn0085407	1.3413	0.551755	0.0840882	Pvf3
FBgn0034073	-0.286008	0.551755	0.0841408	CG8414
FBgn0035861	0.508215	0.552461	0.0843105	CG7213
FBgn0086904	-0.305118	0.553476	0.0846443	Nacalpha
FBgn0039857	-0.310497	0.553476	0.0846925	RpL6
FBgn0013269	-0.310077	0.553476	0.0847198	FK506-bp1
FBgn0265104	0.650199	0.553476	0.0847993	CR44206
FBgn0039226	-0.607647	0.553476	0.0848706	Ude
FBgn0265613	-0.39944	0.553476	0.0850551	CR44431
FBgn0036772	-0.468319	0.553476	0.085076	CG5290
FBgn0031360	-0.250327	0.553476	0.0850775	CG31937
FBgn0015618	0.39377	0.553476	0.0853096	Cdk8
FBgn0083121	-0.939467	0.553476	0.0853342	Uhg7
FBgn0260439	-0.240711	0.553476	0.0853346	Pp2A-29B
FBgn0033088	0.472907	0.553476	0.085409	PGAP3
FBgn0035844	0.644118	0.553476	0.0854091	CG13676
FBgn0032453	-0.253177	0.553476	0.0854966	CG6180
FBgn0038183	-0.304964	0.553476	0.08558	CG9286
FBgn0025680	-0.259068	0.553476	0.0856007	cry
FBgn0036502	0.427997	0.553476	0.0858483	CG7841
FBgn0032590	1.66778	0.553476	0.0858715	CG4631
FBgn0036331	0.349029	0.553476	0.0858939	CG14117
FBgn0038551	0.251734	0.553476	0.0859235	CG7357
FBgn0036623	-0.193222	0.553476	0.0859513	CG4729
FBgn0050021	1.04245	0.553476	0.0859841	metro
FBgn0039757	-0.361364	0.553476	0.0860376	RpS7
FBgn0266124	-0.276465	0.553476	0.0860801	ghi
FBgn0034879	-0.234853	0.553476	0.0860857	Rrp4
FBgn0054039	0.595094	0.553476	0.0861645	CG34039
FBgn0030874	0.414797	0.553476	0.0861932	CG6506
FBgn0052850	-0.29418	0.553476	0.0862634	CG32850
FBgn0034243	-0.304762	0.553476	0.0863567	Ns2
FBgn0051548	-0.298474	0.553476	0.0863645	CG31548
FBgn0051038	-0.357887	0.553476	0.086395	CG31038
FBgn0021768	-0.244232	0.556088	0.0868653	nudC
FBgn0025837	-2.12546	0.556516	0.0870278	CG17636
FBgn0039854	-0.266439	0.556516	0.0870598	CG1635
FBgn0261553	0.369202	0.556516	0.0871356	CG42671
FBgn0037379	0.325692	0.556516	0.0872399	CG10979
FBgn0010398	0.527226	0.556516	0.0873195	Lrr47
FBgn0035523	-0.229332	0.556516	0.0873851	CG1311
FBgn0038519	-0.286666	0.556516	0.0876441	Prx3
FBgn0051324	0.504109	0.556516	0.0876744	CG31324
FBgn0031478	0.247718	0.556516	0.0877193	CG8814
FBgn0036258	-0.341402	0.556516	0.0878091	CG5642
FBgn0045073	-0.174807	0.556516	0.0878429	Stim
FBgn0035287	-0.50835	0.556516	0.0879302	CG13937
FBgn0000520	0.268833	0.556516	0.0879519	dwg
FBgn0033437	0.579111	0.556516	0.0880085	CG12926
FBgn0037468	-0.278494	0.556516	0.0880322	CG1943
FBgn0029176	-0.252373	0.556516	0.0880575	Ef1gamma
FBgn0263469	1.15701	0.556516	0.0880764	snoRNA:SC35-b
FBgn0033989	-0.262474	0.556516	0.0882666	CG7639
FBgn0005648	0.302027	0.556516	0.0882931	Pabp2
FBgn0028684	-0.209619	0.556516	0.0883045	Rpt5
FBgn0027865	-0.691491	0.556516	0.0884324	Tsp96F
FBgn0027329	-0.227435	0.556516	0.088436	Tcp-1zeta
FBgn0001989	-0.296261	0.556516	0.0884878	l(2)35Di
FBgn0033993	-0.539532	0.556516	0.0885221	CG8089
FBgn0032640	-0.203753	0.556516	0.0885367	Sgt
FBgn0052107	1.62189	0.556516	0.0887306	CG32107
FBgn0004868	-0.211059	0.556516	0.0887818	Gdi
FBgn0035644	-0.607992	0.556516	0.0888122	DNApol-epsilon58
FBgn0264368	1.13858	0.556516	0.0888244	CR43820
FBgn0051133	0.676937	0.556516	0.0888957	Slimp
FBgn0027073	0.773457	0.556516	0.088954	CG4302
FBgn0040363	1.63926	0.556516	0.0889941	CG11384
FBgn0032101	-0.297176	0.556516	0.0889975	CG9586
FBgn0058263	-0.289318	0.55672	0.0891226	MFS17
FBgn0021895	0.228204	0.55672	0.0892378	ytr
FBgn0039342	1.05546	0.55672	0.0893087	CG5107
FBgn0267698	-0.329976	0.55672	0.0893602	Pak
FBgn0036191	0.275819	0.55672	0.0893804	Sug
FBgn0030246	0.290284	0.55672	0.0894058	CG1582
FBgn0036213	-0.253584	0.557139	0.0895357	RpL10Ab
FBgn0033741	-0.305503	0.557574	0.0898441	CG8545
FBgn0019957	-0.255114	0.557574	0.0898575	ND42
FBgn0024975	0.355314	0.557574	0.0900017	CG2712
FBgn0039260	-0.183939	0.557574	0.0900538	Smg6
FBgn0053170	-0.400834	0.557574	0.0900839	CG33170
FBgn0013277	-1.8097	0.557574	0.0901022	Hsp70Ba
FBgn0035713	0.282652	0.557574	0.0901705	velo
FBgn0035630	-0.200866	0.557574	0.0902573	CG10576
FBgn0010039	-0.382061	0.557574	0.090275	GstD3
FBgn0038881	-0.303685	0.557574	0.0903024	CG16791
FBgn0265671	1.50684	0.557574	0.0903381	CR44478
FBgn0041160	-0.666078	0.557574	0.0903757	comm2
FBgn0010770	-0.213968	0.557574	0.0904408	ppan
FBgn0015229	0.311884	0.557574	0.0904834	glec
FBgn0267712	0.289724	0.557945	0.0907057	CR46045
FBgn0036926	-0.35367	0.557945	0.090791	CG7646
FBgn0033710	2.0385	0.557945	0.090792	CG17739
FBgn0011762	-0.600515	0.557945	0.0907947	DNApol-alpha50
FBgn0051457	0.396644	0.558681	0.0909773	CG31457
FBgn0041243	-1.25072	0.559399	0.0912039	Gr43a
FBgn0001941	-0.353323	0.559399	0.09122	ifc
FBgn0035838	0.513411	0.559764	0.0914601	ldbr
FBgn0260965	0.653863	0.559764	0.0915143	CG42588
FBgn0038608	-0.452156	0.559764	0.0915246	WRNexo
FBgn0035720	-0.241585	0.559764	0.0915366	CG10077
FBgn0034176	-0.236553	0.559764	0.0915943	ste24a
FBgn0011785	0.311721	0.559823	0.0916862	BRWD3
FBgn0038395	-0.545308	0.559823	0.0917298	CG10407
FBgn0040827	0.678897	0.56009	0.0919759	CG13315
FBgn0263106	-0.855426	0.56009	0.0919985	DnaJ-1
FBgn0034898	-2.69385	0.56009	0.092022	CG18128
FBgn0003866	-0.823607	0.56009	0.0920256	tsh
FBgn0019947	-0.193392	0.560164	0.0922221	Psn
FBgn0035617	0.517669	0.560164	0.0922651	l(3)psg2
FBgn0032248	0.216931	0.560164	0.0922872	Bug22
FBgn0002633	0.671064	0.560164	0.0922897	E(spl)m7-HLH
FBgn0086757	0.413323	0.560376	0.0926487	cbs
FBgn0027066	-0.233928	0.560376	0.0926598	Eb1
FBgn0031540	0.393567	0.560376	0.0927201	CG3238
FBgn0039471	1.52463	0.560376	0.0927556	CG6295
FBgn0039874	-0.197715	0.560376	0.0928132	CG2135
FBgn0052982	-0.206486	0.560376	0.0928178	CG32982
FBgn0062449	0.250482	0.560376	0.0929618	CG13197
FBgn0027084	-0.296351	0.560376	0.0930274	Aats-lys
FBgn0029525	-0.233954	0.560376	0.0930459	CG18273
FBgn0038675	0.341283	0.560376	0.0931036	CG6013
FBgn0267278	-0.350622	0.560376	0.0931109	CR45714
FBgn0033426	0.254202	0.560376	0.0931322	CG1814
FBgn0033459	-0.540097	0.560376	0.093206	CG12744
FBgn0041789	-0.301674	0.560376	0.093207	Pax
FBgn0038014	1.00865	0.560534	0.0932963	CG10041
FBgn0036104	-0.22152	0.560899	0.0934201	CG6418
FBgn0032783	-0.498941	0.561237	0.0936619	CG10237
FBgn0022942	-0.190247	0.561237	0.0937795	Cbp80
FBgn0082994	-1.46814	0.561237	0.0937917	snoRNA:Psi28S-1837c
FBgn0033904	-1.53672	0.561237	0.0938773	CG18327
FBgn0033616	0.306352	0.561237	0.0938853	CG7745
FBgn0032880	-0.190616	0.561237	0.0939265	CG9318
FBgn0035627	0.478309	0.561237	0.0939615	Sse
FBgn0004893	-0.389023	0.561237	0.0939821	bowl
FBgn0029672	-0.260942	0.561237	0.0941039	CG2875
FBgn0034070	1.57391	0.561237	0.0941483	SP2353
FBgn0260940	0.306736	0.561237	0.0942116	lsn
FBgn0039003	0.26163	0.561237	0.0942337	wfs1
FBgn0261636	-1.10149	0.561273	0.0943029	CR42719
FBgn0036567	-1.10147	0.56131	0.0943723	CG13074
FBgn0264979	0.660233	0.561562	0.0945782	CG4267
FBgn0010786	0.236206	0.561562	0.0945825	l(3)02640
FBgn0034062	0.267292	0.561562	0.0946041	CG8388
FBgn0014411	-0.221731	0.561833	0.0947469	Vps26
FBgn0036666	-0.230015	0.561833	0.0948245	TSG101
FBgn0250848	-0.31918	0.561833	0.0949502	26-29-p
FBgn0015221	0.216483	0.561833	0.0949641	Fer2LCH
FBgn0031866	1.37873	0.561833	0.0949656	Nlg2
FBgn0015025	0.741927	0.561977	0.0950939	CkIIalpha-i1
FBgn0261592	-0.3641	0.561977	0.0951164	RpS6
FBgn0038926	-1.52174	0.562051	0.0951921	CG13409
FBgn0020235	-0.237486	0.562197	0.0953078	ATPsyn-gamma
FBgn0035854	-0.338039	0.562197	0.0953433	CG8005
FBgn0050011	0.408301	0.562567	0.0955628	gem
FBgn0036994	0.422287	0.562567	0.0955939	CG5199
FBgn0027080	-0.381363	0.562567	0.0956321	Aats-tyr
FBgn0037207	-0.251078	0.562567	0.0956591	Mes2
FBgn0033199	0.29535	0.563502	0.0959647	CG17985
FBgn0034299	-0.345647	0.563502	0.0959833	CG5757
FBgn0035558	-0.266127	0.563502	0.0960083	CG11357
FBgn0037150	-0.234292	0.563921	0.0961979	CG7133
FBgn0039225	-0.538602	0.563921	0.0962065	Ets96B
FBgn0013276	-1.32813	0.563991	0.0962819	Hsp70Ab
FBgn0037351	-0.289	0.566132	0.096711	RpL13A
FBgn0000108	0.852922	0.567077	0.0969861	Appl
FBgn0259823	-1.45195	0.567077	0.0969999	CG42404
FBgn0037238	2.23967	0.567786	0.0971851	CG1090
FBgn0002641	0.329975	0.568584	0.0973972	mal
FBgn0010397	-0.274107	0.568584	0.0974495	LamC
FBgn0000449	0.479471	0.568701	0.0977079	dib
FBgn0026598	0.40059	0.568701	0.0977248	Apc2
FBgn0004876	-0.255758	0.568701	0.0978227	cdi
FBgn0034657	0.424714	0.568701	0.0978324	LBR
FBgn0027617	0.479729	0.568701	0.0978428	CG5808
FBgn0031990	0.384521	0.568701	0.0978535	CG8552
FBgn0261270	-0.36049	0.568943	0.0979917	SelD
FBgn0250874	-0.22099	0.568943	0.098023	ttm50
FBgn0063498	1.04042	0.56913	0.0981556	GstE2
FBgn0031633	-0.248023	0.56913	0.0982795	Fnta
FBgn0058198	1.11798	0.56913	0.0983174	CG40198
FBgn0029867	-0.252073	0.56913	0.0983372	CG3847
FBgn0004370	0.377076	0.56913	0.0983752	Ptp10D
FBgn0031607	0.269827	0.570136	0.0986557	CG15440
FBgn0033778	0.636932	0.570136	0.0986774	CG3790
FBgn0035878	-0.202194	0.570195	0.0987517	CG7182
FBgn0010352	-0.253015	0.572187	0.0993143	Nc73EF
FBgn0032693	1.46755	0.572187	0.0993332	Cyp310a1
FBgn0031491	0.235205	0.572187	0.0993809	alpha4GT1
FBgn0267208	-0.534381	0.572187	0.0994371	CR45648
FBgn0000412	-0.168214	0.572187	0.09944	D1
FBgn0011770	-0.291717	0.572187	0.0995261	Gip
FBgn0002571	1.03644	0.572187	0.0995471	Mal-A3
FBgn0003721	-0.314549	0.572577	0.0999083	Tm1
FBgn0033948	0.518148	0.572577	0.0999334	CG12863
FBgn0031379	-0.24005	0.572577	0.100053	CG7289
FBgn0035252	-0.203388	0.572577	0.100072	CG7970
FBgn0266324	-0.447818	0.572577	0.100259	CR44989
FBgn0003638	-0.326022	0.572577	0.100293	su(w[a])
FBgn0065098	0.876826	0.572577	0.100332	RNaseMRP:RNA
FBgn0052350	0.35227	0.572577	0.10036	CG32350
FBgn0023197	1.38355	0.572577	0.100452	Jon74E
FBgn0038640	0.307115	0.572577	0.100475	CG7706
FBgn0003087	0.699995	0.572577	0.100505	pim
FBgn0267585	0.545725	0.572577	0.100696	CR45923
FBgn0031528	1.04407	0.572577	0.100725	CG15412
FBgn0003450	0.755935	0.572577	0.100776	snk
FBgn0038682	-0.358513	0.572577	0.100784	CG5835
FBgn0036544	1.26708	0.572577	0.100933	sff
FBgn0031417	0.292961	0.572577	0.100938	CG3597
FBgn0004629	0.322167	0.572577	0.100982	Cys
FBgn0034091	-0.236125	0.572577	0.101013	mrj
FBgn0038546	0.26339	0.572577	0.101021	CG7379
FBgn0030004	0.349873	0.572577	0.10103	CG10958
FBgn0030915	0.313581	0.572577	0.101032	CG6179
FBgn0000181	-0.258099	0.572628	0.101166	bic
FBgn0010041	0.695213	0.572628	0.101251	GstD5
FBgn0010356	0.231894	0.572628	0.101257	Taf5
FBgn0033806	0.47706	0.572628	0.101326	FLASH
FBgn0040348	0.529419	0.572628	0.101363	CG3703
FBgn0030245	-0.231105	0.57295	0.101539	CG1637
FBgn0029830	0.206207	0.57295	0.101633	Grip
FBgn0026250	-0.192191	0.57295	0.101747	eIF-1A
FBgn0021874	-0.215188	0.57295	0.101828	Nle
FBgn0087011	-1.20783	0.57295	0.101884	CG41520
FBgn0038071	-0.300123	0.57295	0.101991	Dtg
FBgn0260462	-0.222032	0.57295	0.102001	CG12163
FBgn0002973	0.212173	0.57295	0.102035	numb
FBgn0023130	0.423816	0.57295	0.102036	a6
FBgn0022343	-0.218061	0.57295	0.102136	CG3760
FBgn0036831	2.3337	0.57295	0.102188	CG6839
FBgn0263316	0.36142	0.57295	0.102259	Mrp4
FBgn0032042	0.304763	0.57295	0.102263	CG13398
FBgn0005386	0.430065	0.57295	0.102383	ash1
FBgn0036446	0.27127	0.57295	0.102429	CG9384
FBgn0036263	0.289838	0.57295	0.102451	thoc6
FBgn0003660	-0.233628	0.573648	0.102652	Syb
FBgn0051643	0.358914	0.573648	0.102723	CG31643
FBgn0037944	-0.280495	0.573648	0.102769	CG6923
FBgn0260444	0.273921	0.573778	0.10288	Not10
FBgn0266700	-0.296832	0.573778	0.102927	CR45190
FBgn0038460	-0.36929	0.573778	0.10299	CG18622
FBgn0038842	0.533269	0.573778	0.10305	hdly
FBgn0261975	-0.306551	0.574968	0.103485	CG42806
FBgn0035830	-0.192147	0.574968	0.10349	CG8209
FBgn0034849	0.290603	0.574968	0.103508	CG3500
FBgn0032876	0.527647	0.574968	0.103598	Cen
FBgn0086690	-0.414664	0.574968	0.103657	cp309
FBgn0033089	0.429386	0.574968	0.103679	CG17266
FBgn0266304	-0.283998	0.574968	0.103717	CR44969
FBgn0036663	-0.296611	0.575281	0.103838	CG9674
FBgn0036300	0.417483	0.575424	0.103928	CG10688
FBgn0051522	-0.209844	0.576462	0.104181	CG31522
FBgn0000286	0.390153	0.576764	0.104327	Cf2
FBgn0002930	1.73241	0.576764	0.104365	nec
FBgn0034800	-0.503787	0.577066	0.104485	CG3788
FBgn0039830	-0.276011	0.577136	0.104562	CG1746
FBgn0033677	0.297297	0.577439	0.104682	CG8321
FBgn0030432	-0.291435	0.57759	0.104826	CG4404
FBgn0015024	-0.1758	0.57759	0.104839	CkIalpha
FBgn0264704	0.802496	0.578547	0.105083	CR43973
FBgn0040020	0.298968	0.578547	0.105143	MED21
FBgn0020388	0.302753	0.578727	0.105241	Gcn5
FBgn0031813	-0.362204	0.578787	0.105317	CG9527
FBgn0030316	0.279671	0.578827	0.105435	CG11695
FBgn0025683	-0.302165	0.578827	0.105626	CG3164
FBgn0004907	-0.183791	0.578827	0.10563	14-3-3zeta
FBgn0035246	0.571824	0.578827	0.105665	CG13928
FBgn0033132	-0.300627	0.578827	0.105671	Tsp42Ej
FBgn0032923	-0.236081	0.578827	0.105763	CG9248
FBgn0031914	1.62221	0.578827	0.105814	CG5973
FBgn0037051	-0.25825	0.578827	0.105917	CG10565
FBgn0031146	1.0937	0.578827	0.106142	CG15449
FBgn0015623	0.41157	0.578827	0.106158	Cpr
FBgn0030990	-0.175575	0.578827	0.106191	CG7556
FBgn0029888	-0.232524	0.578827	0.106259	CG3192
FBgn0040805	0.671562	0.578827	0.10633	CG12355
FBgn0033581	0.21886	0.578827	0.106352	CG12391
FBgn0034814	0.216804	0.578827	0.106355	CG9890
FBgn0039106	-1.61561	0.578827	0.106366	CG10301
FBgn0046302	0.512138	0.580176	0.106734	CG10650
FBgn0034936	-0.260678	0.580176	0.10677	CG2970
FBgn0027528	1.49559	0.580176	0.106809	CG9634
FBgn0035911	-0.251067	0.58069	0.106974	CG6638
FBgn0031655	0.40919	0.58069	0.107104	Marcal1
FBgn0004509	0.576571	0.58069	0.107138	Fur1
FBgn0011648	-0.201518	0.58069	0.107227	Mad
FBgn0036460	-0.231767	0.58069	0.107231	CG5114
FBgn0037781	0.729603	0.58069	0.107352	Fancl
FBgn0033972	-0.231336	0.58069	0.107517	Ciao1
FBgn0038745	-0.222748	0.58069	0.107527	CG4538
FBgn0030692	-0.219311	0.58069	0.107559	mRpS30
FBgn0025702	1.27463	0.58069	0.107588	srpk79D
FBgn0265193	0.316353	0.58069	0.107709	Atf-2
FBgn0032726	1.09603	0.58069	0.107925	CG10621
FBgn0040262	-0.908533	0.58069	0.107937	Ugt36Ba
FBgn0034025	0.25576	0.58069	0.107937	GalNAc-T1
FBgn0035025	0.253893	0.58069	0.10797	uri
FBgn0031494	-0.476795	0.58069	0.108049	CG17219
FBgn0052344	-0.233953	0.58069	0.108092	CG32344
FBgn0030775	0.605503	0.58069	0.10813	CG9673
FBgn0036929	0.239024	0.58069	0.108227	CG7668
FBgn0039942	0.472318	0.58069	0.108228	CG17163
FBgn0027054	-0.169335	0.58069	0.108286	CSN4
FBgn0051231	-2.68867	0.58069	0.108341	CG31231
FBgn0032373	0.822313	0.581056	0.108487	Vha100-5
FBgn0024734	-0.222927	0.581056	0.10854	PRL-1
FBgn0267439	-0.417118	0.582457	0.108867	CR45789
FBgn0002921	-0.235975	0.582549	0.10895	Atpalpha
FBgn0032801	-0.315895	0.582874	0.10914	CG10165
FBgn0004362	0.293297	0.582874	0.109141	HmgD
FBgn0037544	0.449343	0.582931	0.109263	CG11035
FBgn0032401	0.396886	0.582931	0.109409	Plzf
FBgn0038811	-0.365573	0.582931	0.109409	CG4159
FBgn0058160	-0.326876	0.582931	0.109414	CG40160
FBgn0028518	-0.25788	0.583166	0.109524	CG18480
FBgn0038662	-0.263269	0.583959	0.109739	Mpc1
FBgn0030660	0.26987	0.58422	0.109853	CG8097
FBgn0019972	-0.219174	0.584464	0.109987	Drice
FBgn0037084	0.241803	0.584464	0.110271	Syx6
FBgn0002552	0.275347	0.584464	0.110286	lin
FBgn0005638	1.06107	0.584464	0.110286	slbo
FBgn0064225	-0.405359	0.584464	0.11029	RpL5
FBgn0040238	-0.39695	0.584464	0.110294	Best1
FBgn0085285	0.741438	0.586317	0.110709	CG34256
FBgn0011509	-0.226353	0.586609	0.11083	SrpRbeta
FBgn0000152	-0.29491	0.586623	0.110904	Axs
FBgn0040337	-0.308514	0.586623	0.111028	CG3021
FBgn0026702	-0.273451	0.586623	0.111104	l(1)G0045
FBgn0038235	0.348363	0.586623	0.111118	CG8461
FBgn0029608	1.08094	0.586623	0.111163	CG3091
FBgn0035057	0.989716	0.586777	0.111258	CG3880
FBgn0016120	-0.228129	0.586879	0.111343	ATPsyn-d
FBgn0031050	-0.24316	0.587077	0.111527	Arp10
FBgn0002569	-0.979297	0.587077	0.111577	Mal-A2
FBgn0053542	-0.482913	0.587077	0.111644	upd3
FBgn0051637	0.217416	0.587077	0.111677	CG31637
FBgn0013732	0.813446	0.587077	0.111711	sced
FBgn0030522	0.614695	0.587089	0.111779	CG11103
FBgn0034638	0.66941	0.587411	0.11196	CG10433
FBgn0003977	0.271206	0.587411	0.111973	vir
FBgn0032949	-0.253982	0.587939	0.112191	Lamp1
FBgn0051815	1.55217	0.587939	0.112236	CG31815
FBgn0031814	0.227704	0.587939	0.112355	retm
FBgn0030234	0.870066	0.587939	0.112366	CG15211
FBgn0034748	0.185878	0.587939	0.112404	CG17807
FBgn0032916	0.364246	0.58828	0.112623	CG9257
FBgn0034259	-0.244461	0.58828	0.112653	P32
FBgn0034583	-0.25335	0.58828	0.112668	CG10527
FBgn0025807	0.445975	0.588344	0.112773	Rad9
FBgn0027525	-0.208916	0.588344	0.112861	CG7686
FBgn0030774	1.17996	0.588344	0.112882	spheroide
FBgn0029507	-0.40475	0.588344	0.113024	Tsp42Ed
FBgn0030806	0.441106	0.588344	0.113126	CG13001
FBgn0033875	0.281164	0.588344	0.113253	CG6357
FBgn0013753	0.430541	0.588344	0.113316	Bgb
FBgn0033799	0.640278	0.588344	0.113335	GLaz
FBgn0002036	0.409363	0.588344	0.113339	CG10561
FBgn0039654	0.216125	0.588344	0.113342	Brd8
FBgn0039544	0.363659	0.589184	0.11357	CG12877
FBgn0028688	-0.212335	0.589772	0.113749	Rpn7
FBgn0039467	-0.243357	0.589884	0.113837	CG14253
FBgn0036090	0.32544	0.590453	0.11407	CG8009
FBgn0011802	0.504609	0.590453	0.11408	Gem3
FBgn0029789	0.248917	0.590479	0.114151	CG3160
FBgn0265759	0.612712	0.590689	0.114258	CR44566
FBgn0033809	1.00801	0.591895	0.11466	CG4630
FBgn0034045	-1.10405	0.591895	0.114665	CG8249
FBgn0031403	0.535614	0.591895	0.114734	CG15387
FBgn0026316	-0.265629	0.591895	0.114758	Ubc10
FBgn0003499	-1.57247	0.592397	0.114922	sr
FBgn0051251	0.700294	0.592685	0.115044	CG31251
FBgn0262115	0.195368	0.593032	0.115178	CG17683
FBgn0083970	-0.432736	0.593204	0.115288	CG34134
FBgn0036053	-0.250076	0.593204	0.115345	iPLA2-VIA
FBgn0031628	0.389741	0.593811	0.11553	CG3294
FBgn0051729	-0.163765	0.593832	0.115723	CG31729
FBgn0265731	1.05721	0.593832	0.115769	CR44538
FBgn0003415	0.431462	0.593832	0.115946	skd
FBgn0037239	0.279357	0.593832	0.115957	CG11739
FBgn0033453	0.243085	0.593832	0.116038	CG1667
FBgn0039946	0.449447	0.593832	0.116071	ATbp
FBgn0011592	0.269746	0.593832	0.116384	fra
FBgn0261610	0.3387	0.593832	0.116391	CG42699
FBgn0028664	0.387162	0.593832	0.116393	VhaM9.7-c
FBgn0033303	-0.353846	0.593832	0.116434	Cyp6a15Psi
FBgn0032666	0.56524	0.593832	0.116586	CG5758
FBgn0037899	-0.290289	0.593832	0.116637	RpL24-like
FBgn0037782	1.74708	0.593832	0.116638	Npc2d
FBgn0030093	0.213122	0.593832	0.1167	dalao
FBgn0025624	-0.19542	0.593832	0.116724	CG4025
FBgn0035702	0.378659	0.593832	0.116785	CG10147
FBgn0035879	-0.197097	0.593832	0.116791	GAPcenA
FBgn0004919	0.431731	0.593832	0.116875	gol
FBgn0038660	0.858426	0.593832	0.116913	CG14291
FBgn0015541	-0.259934	0.593832	0.117011	sda
FBgn0038564	0.267461	0.593832	0.117081	CG7785
FBgn0266889	-0.214657	0.593832	0.117092	CR45350
FBgn0031896	0.231528	0.593832	0.117135	CG4502
FBgn0266083	0.618275	0.593832	0.117153	ocm
FBgn0031488	0.367885	0.593832	0.117204	CG17265
FBgn0015568	-0.638892	0.594005	0.117404	alpha-Est1
FBgn0010607	0.427582	0.594005	0.117428	l(2)05714
FBgn0003598	0.279071	0.594005	0.117438	Su(var)3-7
FBgn0033757	0.294672	0.594178	0.117539	muskelin
FBgn0026393	-0.411884	0.59561	0.117889	Or43b
FBgn0263606	0.484026	0.596116	0.118094	Hsc20
FBgn0000546	0.42312	0.596116	0.118124	EcR
FBgn0085390	-0.533873	0.59643	0.118276	Dgk
FBgn0032814	0.236017	0.59643	0.118359	CG10366
FBgn0035699	0.724173	0.59643	0.11842	CG13300
FBgn0031741	-0.686691	0.59643	0.118454	CG11034
FBgn0032361	0.334593	0.596854	0.118616	CG6488
FBgn0051473	0.355795	0.596854	0.118726	CG31473
FBgn0052251	-0.407039	0.596854	0.11874	Claspin
FBgn0052706	0.607842	0.597449	0.118935	CG32706
FBgn0266429	0.889366	0.597449	0.118993	AstA-R1
FBgn0264517	-0.414902	0.597604	0.119091	CR43916
FBgn0035754	0.305335	0.598127	0.119262	MED4
FBgn0020762	0.366287	0.598267	0.119383	Atet
FBgn0032691	0.334931	0.598267	0.119425	Atac2
FBgn0033569	0.373438	0.599605	0.119825	CG12942
FBgn0035876	0.239994	0.599605	0.119827	Pex2
FBgn0036488	-0.337296	0.599798	0.119933	CG6878
FBgn0262741	0.351908	0.600018	0.120071	MRE23
FBgn0030877	0.184425	0.600018	0.120254	Arp8
FBgn0267768	-0.275887	0.600018	0.120269	CR46099
FBgn0034051	-0.222481	0.600018	0.12031	Mlf
FBgn0025724	-0.208908	0.600018	0.120314	beta'COP
FBgn0034853	0.287808	0.60046	0.120528	Ice1
FBgn0038016	0.185653	0.60046	0.120648	MBD-R2
FBgn0029091	-0.470507	0.60046	0.120667	CS-2
FBgn0052181	1.08718	0.60046	0.120673	CG32181
FBgn0024983	0.254917	0.600824	0.120955	CG4293
FBgn0039613	1.2086	0.600824	0.120999	CG14527
FBgn0028331	0.255237	0.600824	0.121053	l(1)G0289
FBgn0037534	-1.09433	0.600824	0.121081	CG2781
FBgn0037624	-0.202428	0.600824	0.121084	CG8223
FBgn0002031	-0.220237	0.601233	0.121234	l(2)37Cc
FBgn0033153	0.44345	0.601366	0.121328	Gadd45
FBgn0260431	0.341376	0.601588	0.121542	CG42526
FBgn0031233	0.305934	0.601588	0.121571	Tbc1d15-17
FBgn0266635	-0.267645	0.601588	0.121765	CR45142
FBgn0039109	0.266024	0.601588	0.121819	CG10365
FBgn0032243	0.214807	0.601588	0.12192	Klp31E
FBgn0027592	-0.180523	0.601588	0.121945	MED15
FBgn0035588	-0.237056	0.601588	0.122014	CG10672
FBgn0039557	0.30265	0.601588	0.122046	CG12259
FBgn0029147	-0.562925	0.601588	0.122227	NtR
FBgn0032198	-0.266539	0.601588	0.122253	eEF1delta
FBgn0004797	-0.319452	0.601588	0.122268	mdy
FBgn0265345	0.730787	0.601588	0.122312	CR44299
FBgn0063497	0.423336	0.601588	0.12236	GstE3
FBgn0085431	1.5712	0.601588	0.122471	CG34402
FBgn0261396	-0.201559	0.601588	0.122519	Rpn3
FBgn0035044	-0.336882	0.601588	0.122596	CG3663
FBgn0050169	0.427837	0.601588	0.122799	Brca2
FBgn0033712	0.416208	0.601588	0.122806	CG13163
FBgn0014395	1.78723	0.601588	0.122894	tilB
FBgn0033427	-0.313342	0.601588	0.122901	CG1868
FBgn0029687	-0.16285	0.601588	0.122901	Vap-33A
FBgn0038952	-2.21233	0.601588	0.123026	CG7069
FBgn0052100	0.315199	0.601588	0.123231	CG32100
FBgn0053493	0.775151	0.601588	0.123292	CG33493
FBgn0000042	-0.200258	0.601588	0.123312	Act5C
FBgn0004638	-0.183133	0.601588	0.123337	drk
FBgn0038737	0.312085	0.601588	0.123422	CG11447
FBgn0010501	-0.441083	0.601588	0.123545	Dcp-1
FBgn0035109	0.366178	0.601588	0.123556	CG13876
FBgn0029799	-0.324918	0.601588	0.123619	CG15772
FBgn0035085	-0.226052	0.601588	0.123629	CG3770
FBgn0026666	0.435335	0.601588	0.123663	l(1)G0136
FBgn0267588	-0.167463	0.601588	0.123848	CR45926
FBgn0037360	-0.179835	0.601588	0.12386	CG2182
FBgn0036005	0.297961	0.601588	0.124019	pall
FBgn0032150	0.420263	0.601588	0.124043	CG13123
FBgn0261112	0.295509	0.601588	0.124077	APP-BP1
FBgn0004389	1.51631	0.601588	0.124082	bnk
FBgn0037356	0.545461	0.601588	0.124187	CG12170
FBgn0261014	-0.182223	0.601588	0.124274	TER94
FBgn0035719	0.501987	0.601588	0.124318	tow
FBgn0031773	0.341704	0.601588	0.124407	Fbw5
FBgn0030518	-0.285223	0.601588	0.124461	CG11134
FBgn0026427	0.467424	0.601588	0.124488	Su(var)2-HP2
FBgn0030853	-0.232565	0.601588	0.124505	CG5703
FBgn0036641	0.434842	0.601588	0.124524	Smn
FBgn0033698	0.307452	0.601588	0.124603	CG8858
FBgn0030876	0.271857	0.601588	0.12462	CG6762
FBgn0001105	-0.193451	0.602079	0.12479	Gbeta13F
FBgn0031321	-0.184101	0.602307	0.124905	Tgt
FBgn0033905	-0.248295	0.603679	0.12531	CG18324
FBgn0037708	-0.205886	0.603679	0.125325	CG9386
FBgn0001084	0.473639	0.603806	0.125518	fy
FBgn0065099	0.620868	0.603806	0.125785	snRNA:7SK
FBgn0267528	-1.61258	0.603806	0.125793	CR45868
FBgn0033274	-0.454802	0.603806	0.125846	CG14757
FBgn0262580	0.708188	0.603806	0.125897	CG43120
FBgn0032131	-1.33975	0.603806	0.125968	CG3841
FBgn0023507	-0.171225	0.603806	0.125983	CG3835
FBgn0037369	-0.267601	0.603806	0.126078	CG2100
FBgn0037543	-0.219216	0.603806	0.126084	CG10903
FBgn0035825	0.183593	0.603806	0.126136	CG8111
FBgn0050096	0.542705	0.603806	0.126172	CG30096
FBgn0051354	-1.74957	0.603806	0.126227	Hsp70Bbb
FBgn0027111	0.512951	0.603806	0.126275	miple
FBgn0051998	0.289846	0.603806	0.126302	CG31998
FBgn0013750	-0.194437	0.605211	0.126683	Arf51F
FBgn0038858	-0.298586	0.605211	0.126732	CG5793
FBgn0014930	-0.25495	0.605285	0.126816	CG2846
FBgn0002778	-0.247652	0.60573	0.126977	mnd
FBgn0263256	0.614736	0.606253	0.127158	CG43394
FBgn0032822	0.546594	0.606253	0.127252	CG10466
FBgn0262570	0.640122	0.606253	0.127291	CG43110
FBgn0029892	0.312751	0.606367	0.127425	CG3184
FBgn0038237	0.344767	0.606367	0.127553	Pde6
FBgn0013954	-0.222492	0.606367	0.127602	FK506-bp2
FBgn0034729	0.72889	0.606367	0.12768	CG10344
FBgn0011638	-0.22355	0.606367	0.127711	La
FBgn0053107	0.357632	0.606367	0.12778	CG33107
FBgn0038316	0.214788	0.606367	0.127793	CG6276
FBgn0031117	-0.266335	0.606436	0.127994	GstT3
FBgn0032870	0.340106	0.606436	0.128045	CG2608
FBgn0035851	0.189996	0.606436	0.128078	MED24
FBgn0039886	1.61281	0.606436	0.128108	CG2003
FBgn0038321	-0.219031	0.606436	0.128219	CG6218
FBgn0051912	0.433288	0.606436	0.128267	CR31912
FBgn0036186	-0.622517	0.606436	0.128346	CG6071
FBgn0042701	-0.604169	0.606436	0.128378	CR12628
FBgn0039930	-0.335309	0.606436	0.128421	CG11077
FBgn0042101	0.526257	0.606462	0.128495	CG18744
FBgn0035833	-0.252779	0.607063	0.128718	CG7565
FBgn0037736	1.72716	0.607063	0.128758	CG12950
FBgn0032934	0.291607	0.6075	0.128922	CG8679
FBgn0028647	0.307262	0.6075	0.129102	CG11902
FBgn0035977	0.294368	0.6075	0.129138	PGRP-LF
FBgn0030943	-0.358494	0.6075	0.129154	CG6540
FBgn0032231	0.242219	0.6075	0.129193	CG5056
FBgn0262203	-1.38596	0.607595	0.129281	mir-967
FBgn0026252	-0.222519	0.609018	0.129653	msk
FBgn0035781	2.44094	0.609563	0.129875	CG8560
FBgn0038880	0.938718	0.609563	0.129906	SIFaR
FBgn0003984	0.606943	0.610065	0.130131	vn
FBgn0015268	-0.166808	0.610065	0.13015	Nap1
FBgn0266284	-0.17651	0.610517	0.13042	Ns3
FBgn0030694	0.325154	0.610517	0.13049	CG15602
FBgn0026878	-0.389995	0.610517	0.130593	CG4325
FBgn0031824	-0.225422	0.610517	0.130654	CG9547
FBgn0039328	0.299746	0.610517	0.130759	CHKov2
FBgn0033582	0.587492	0.610517	0.130794	CG9084
FBgn0015380	0.428428	0.610517	0.13083	drl
FBgn0033900	0.359491	0.610517	0.13092	CG8257
FBgn0037249	-0.204435	0.610517	0.131034	eIF3-S10
FBgn0020930	0.213453	0.610517	0.131094	Dgkepsilon
FBgn0033115	0.3933	0.610517	0.131176	Spn42De
FBgn0032346	0.318929	0.610517	0.131179	Csl4
FBgn0033376	0.257966	0.610517	0.131253	CG8777
FBgn0027785	-0.211651	0.610517	0.131411	NP15.6
FBgn0025809	0.246206	0.610517	0.131528	Paf-AHalpha
FBgn0032330	0.262555	0.610517	0.131545	Samuel
FBgn0266946	-0.45802	0.610517	0.13161	CR45397
FBgn0261530	0.228641	0.610517	0.131704	nbs
FBgn0010531	0.274584	0.610517	0.13171	Ccs
FBgn0027499	0.404436	0.610517	0.131716	wde
FBgn0044872	0.933584	0.610517	0.131741	FucTC
FBgn0028468	-0.207875	0.610517	0.131757	rtet
FBgn0031285	-0.192216	0.610762	0.131879	CG3662
FBgn0031579	0.53563	0.611223	0.132113	CG15422
FBgn0031016	-0.229173	0.611223	0.132116	kek5
FBgn0043001	0.483166	0.611906	0.132447	Chrac-16
FBgn0051721	0.298853	0.611906	0.132526	Trim9
FBgn0261238	0.256361	0.611906	0.132614	Alh
FBgn0000556	-0.348465	0.611906	0.132684	Ef1alpha48D
FBgn0034914	-0.167437	0.611906	0.132827	CG5554
FBgn0015245	-0.192562	0.611906	0.132857	Hsp60
FBgn0032388	0.253943	0.611906	0.132863	CG6686
FBgn0001217	1.82544	0.611906	0.132913	Hsc70-2
FBgn0052808	0.623847	0.611906	0.13293	CG32808
FBgn0000326	-0.329154	0.611906	0.132951	clt
FBgn0027791	-0.29546	0.611961	0.133151	O-fut2
FBgn0050323	-1.46779	0.611961	0.133217	CG30323
FBgn0040650	0.410679	0.611961	0.133278	CG15456
FBgn0015278	0.25371	0.611961	0.133352	Pi3K68D
FBgn0052817	0.522057	0.611961	0.133353	CG32817
FBgn0037688	0.187798	0.611961	0.133376	CG9356
FBgn0033178	-0.242522	0.612982	0.133846	CG11127
FBgn0050421	0.214333	0.612982	0.133847	CG30421
FBgn0050443	0.349668	0.612982	0.133859	Opbp
FBgn0086895	0.351453	0.612982	0.133874	pea
FBgn0050005	-0.235265	0.61306	0.134085	GstT2
FBgn0035020	-0.214585	0.61306	0.134159	CG13585
FBgn0036423	0.577508	0.61306	0.134258	CG3919
FBgn0041096	0.520165	0.61306	0.134316	rols
FBgn0029835	0.787441	0.61306	0.134332	CG5921
FBgn0038772	0.410704	0.61306	0.134355	mdlc
FBgn0032877	0.314082	0.61306	0.134434	CG2617
FBgn0030240	0.287582	0.61306	0.13459	CG2202
FBgn0040070	0.296805	0.61306	0.134594	Trx-2
FBgn0041186	0.258951	0.61306	0.134688	Slbp
FBgn0036099	-0.192381	0.61306	0.134746	CG11811
FBgn0029822	0.370456	0.61306	0.134845	CG12236
FBgn0038860	0.484407	0.61306	0.134855	Ice2
FBgn0031092	-0.302439	0.61306	0.134857	CG9577
FBgn0038490	0.457679	0.613506	0.13509	CG5285
FBgn0032144	1.72526	0.613506	0.135263	CG17633
FBgn0029629	-0.29618	0.613506	0.135268	CG8636
FBgn0030504	-0.24195	0.613506	0.135328	CG2691
FBgn0003218	0.363048	0.613506	0.135346	rdgB
FBgn0030655	0.285658	0.613506	0.135369	CG9213
FBgn0004569	-0.306483	0.614289	0.135611	aos
FBgn0034618	0.501708	0.614328	0.135697	CG9485
FBgn0001133	0.202931	0.614328	0.135783	grau
FBgn0005278	-0.218898	0.614328	0.135826	Sam-S
FBgn0021995	-0.22477	0.615394	0.136131	Rs1
FBgn0031495	-0.216457	0.615496	0.136223	GABPI
FBgn0039321	0.659752	0.615559	0.136306	CG10550
FBgn0040285	-0.232313	0.615805	0.13643	Scamp
FBgn0038320	-0.190468	0.615876	0.136515	Sra-1
FBgn0020912	0.262829	0.615923	0.136595	Ptx1
FBgn0000032	-0.196295	0.616242	0.136735	Acph-1
FBgn0032409	-0.244255	0.616646	0.136894	Ced-12
FBgn0033423	0.375501	0.616732	0.136982	CG1809
FBgn0024364	-0.252921	0.616737	0.137053	CG11417
FBgn0266361	1.3547	0.617163	0.137446	CR45009
FBgn0032922	0.338036	0.617163	0.137587	CG9249
FBgn0010348	-0.218281	0.617163	0.137594	Arf79F
FBgn0011774	0.260619	0.617163	0.137658	Irbp
FBgn0051549	0.299039	0.617163	0.137709	CG31549
FBgn0011297	-0.175852	0.617163	0.137725	l(2)not
FBgn0033897	0.159347	0.617163	0.137737	Rcd1
FBgn0039170	1.60377	0.617163	0.137775	CG13609
FBgn0038871	-0.171638	0.617163	0.137783	CG3337
FBgn0037110	0.307615	0.617163	0.137845	ORMDL
FBgn0015818	0.155162	0.617163	0.137976	Spx
FBgn0266880	0.910073	0.617163	0.13798	CR45341
FBgn0002783	0.190439	0.617622	0.138152	mor
FBgn0032730	0.350771	0.618026	0.138354	CG10431
FBgn0037686	-0.383822	0.618026	0.138382	RpL34b
FBgn0002791	0.227073	0.619367	0.138828	mr
FBgn0013675	-0.230137	0.619367	0.138853	mt:CoII
FBgn0027654	1.50589	0.619367	0.138916	jdp
FBgn0036565	-0.226895	0.619367	0.138968	CG5235
FBgn0037552	-0.25496	0.619367	0.13903	CG7800
FBgn0267702	0.682474	0.620474	0.13937	CR46035
FBgn0004573	1.44204	0.620474	0.139418	5-HT7
FBgn0039697	-0.18775	0.620744	0.139549	CG7834
[truncated: 15,560 more rows]

## Sheet: Midage vs Young p<0.05
annotation_name	logFC	p	pval	symbol
FBgn0038681	1.39519	0.0175384	1.97239e-06	Cyp12a4
FBgn0033926	1.31598	0.0210745	9.49491e-06	Arc1
FBgn0051288	1.72648	0.0210745	9.57278e-06	CG31288
FBgn0030367	-2.09321	0.0210745	1.04861e-05	Cyp311a1
FBgn0051370	1.0413	0.0210745	1.50038e-05	CG31370
FBgn0002985	1.19762	0.0210745	1.65241e-05	odd
FBgn0040726	2.43403	0.0210745	1.85972e-05	dpr
FBgn0263974	4.73343	0.0210745	1.92233e-05	qin
FBgn0261089	2.5456	0.0210745	2.13304e-05	Sytalpha
FBgn0261873	1.52878	0.0217861	2.45008e-05	sdt

## Sheet: Old vs Young unfiltered
annotation_name	logFC	p	pval	symbol
FBgn0261089	4.01824	0.000301509	6.43407e-08	Sytalpha
FBgn0051370	1.56901	0.000301509	1.23056e-07	CG31370
FBgn0039319	1.82957	0.000301509	1.40037e-07	CG13659
FBgn0002735	2.07681	0.000301509	1.4716e-07	E(spl)mgamma-HLH
FBgn0051288	2.14917	0.000301509	1.70344e-07	CG31288
FBgn0034639	1.47755	0.000764842	5.18537e-07	CG15673
FBgn0004646	2.21765	0.000956438	8.32052e-07	ogre
FBgn0040726	3.2076	0.000956438	9.45373e-07	dpr
FBgn0002985	1.3379	0.000956438	9.72649e-07	odd
FBgn0040837	1.4289	0.00106093	1.20216e-06	CG8620
FBgn0039316	1.96527	0.00106093	1.39119e-06	CG11893
FBgn0035167	3.32175	0.00106093	1.44044e-06	Gr61a
FBgn0034647	0.938934	0.00106093	1.55843e-06	pirk
FBgn0050090	1.80051	0.00135895	2.14975e-06	CG30090
FBgn0029710	1.89656	0.00136138	2.30743e-06	CG3568
FBgn0030367	-2.91677	0.00156794	3.04661e-06	Cyp311a1
FBgn0051436	1.60655	0.00156794	3.32239e-06	CG31436
FBgn0028990	1.48006	0.00156794	3.58497e-06	Spn27A
FBgn0262854	-1.86002	0.00156794	3.71137e-06	CG43218
FBgn0004635	1.95603	0.00156794	3.85127e-06	rho
FBgn0033926	1.54788	0.00156794	3.96804e-06	Arc1
FBgn0013323	1.9607	0.00156794	3.98504e-06	Ptth
FBgn0003710	2.27461	0.00156794	4.07487e-06	tipE
FBgn0030723	2.20845	0.00161569	4.38154e-06	dpr18
FBgn0003187	4.62138	0.00162799	4.59883e-06	qua
FBgn0025641	-1.60623	0.00167876	4.93194e-06	DAAM
FBgn0037525	1.69842	0.00209336	6.38653e-06	CG17816
FBgn0030607	2.68714	0.00258887	8.19078e-06	dob
FBgn0031490	1.37358	0.00356684	1.16879e-05	CG17264
FBgn0261873	1.43823	0.00449625	1.52415e-05	sdt
FBgn0025525	1.55504	0.00483064	1.69209e-05	bab2
FBgn0262620	2.5748	0.00491656	1.79999e-05	CR43144
FBgn0000489	5.98165	0.00491656	1.83329e-05	Pka-C3
FBgn0041182	1.1629	0.00528409	2.08518e-05	Tep2
FBgn0032981	4.03834	0.00528409	2.08975e-05	CG3635
FBgn0034399	-1.02047	0.00534266	2.21889e-05	CG15083
FBgn0032629	3.36082	0.00534266	2.23826e-05	beat-IIIc
FBgn0000015	3.85992	0.00534266	2.29402e-05	Abd-B
FBgn0032297	-1.07928	0.00551555	2.43828e-05	CG17124
FBgn0010263	2.18118	0.00551555	2.49291e-05	Rbp9
FBgn0003944	1.30739	0.00563285	2.60957e-05	Ubx
FBgn0040256	1.14383	0.00576224	2.73462e-05	Ugt86Dd
FBgn0261363	2.10024	0.00655917	3.18694e-05	PPO3
FBgn0031489	1.09045	0.00698808	3.4743e-05	CG17224
FBgn0033928	1.00392	0.00716824	3.64487e-05	Arc2
FBgn0030976	1.35084	0.00752807	3.97055e-05	CG7378
FBgn0023525	1.52281	0.00752807	3.99796e-05	CG3191
FBgn0031805	0.852146	0.00768867	4.17012e-05	CG9505
FBgn0030796	4.55521	0.00841378	4.65848e-05	CG4829
FBgn0016131	-0.79056	0.00864551	4.88447e-05	Cdk4
FBgn0034480	1.39615	0.00982241	5.77342e-05	CG16898
FBgn0052625	3.56541	0.00982241	5.85341e-05	CG32625
FBgn0051097	3.723	0.00982241	5.88235e-05	CG31097
FBgn0023416	1.17932	0.010086	6.15415e-05	Ac3
FBgn0262742	2.86842	0.0107674	6.6916e-05	Fas1
FBgn0000210	1.59373	0.0108843	6.88721e-05	br
FBgn0033978	0.852555	0.0133261	8.70853e-05	Cyp6a23
FBgn0038476	-0.723399	0.0133261	8.73347e-05	kuk
FBgn0040056	-0.656278	0.0140743	9.38289e-05	CG17698
FBgn0038804	0.808466	0.0151364	0.00010262	CG10877
FBgn0264542	1.68651	0.0163918	0.000112983	CG43921
FBgn0031322	0.746211	0.0166053	0.000116331	CG5001
FBgn0033875	0.82904	0.0166908	0.000118816	CG6357
FBgn0086687	-0.621061	0.0167681	0.000121261	Desat1
FBgn0260657	3.51268	0.0175278	0.000128736	CG42540
FBgn0030778	1.04073	0.0186055	0.000138753	CG4678
FBgn0027550	1.24718	0.0186281	0.000141026	CG6495
FBgn0011822	1.74154	0.0198619	0.000153469	pcl
FBgn0004892	0.871552	0.0198619	0.000154856	sob
FBgn0063493	1.18046	0.0199147	0.000158467	GstE7
FBgn0267733	0.676218	0.0199147	0.000159768	CR46064
FBgn0050456	0.844771	0.0207809	0.000169065	CG30456
FBgn0010225	-1.26076	0.0208299	0.000171818	Gel
FBgn0005612	0.553708	0.02272	0.000189975	Sox14
FBgn0003285	1.74309	0.0231503	0.000200097	rst
FBgn0262636	-3.05669	0.0231503	0.000200204	Lin29
FBgn0024920	-0.984531	0.0231503	0.000201421	Ts
FBgn0264745	1.90489	0.0249535	0.000220489	CR44003
FBgn0053087	1.05149	0.0249535	0.000222997	LRP1
FBgn0039282	4.49918	0.0249535	0.000225568	Bili
FBgn0050414	0.654742	0.0265597	0.000243089	CG30414
FBgn0267486	1.63548	0.0281553	0.000260874	Ptp36E
FBgn0032050	-0.618259	0.0305519	0.000290398	CG13096
FBgn0264907	1.70373	0.0305519	0.000293925	CG44098
FBgn0039315	1.6223	0.0305519	0.000298566	CG13658
FBgn0063494	1.00838	0.0305519	0.000299646	GstE6
FBgn0036993	0.778551	0.0305519	0.000302656	CG5910
FBgn0262970	0.708032	0.0305519	0.000303792	CR43281
FBgn0026718	-0.739448	0.0306132	0.000314458	fu12
FBgn0265759	1.34881	0.0306132	0.000314723	CR44566
FBgn0013995	-0.81554	0.0306132	0.00031478	Calx
FBgn0026197	1.83337	0.030727	0.000319546	noe
FBgn0034638	1.52673	0.030727	0.000322894	CG10433
FBgn0032946	1.34867	0.03081	0.000327248	nrv3
FBgn0037623	0.928855	0.0308716	0.00033139	CG9801
FBgn0039201	4.23941	0.0308979	0.000335164	CG13617
FBgn0003068	-0.609709	0.0313814	0.000345873	per
FBgn0035287	-1.56668	0.0313814	0.0003475	CG13937
FBgn0038721	2.2096	0.0315091	0.000352475	subdued
FBgn0033446	-0.558036	0.0324022	0.000366127	CG1648
FBgn0033799	1.37522	0.0326959	0.000377687	GLaz
FBgn0261041	4.09347	0.0326959	0.000378141	stj
FBgn0004169	3.20086	0.0326959	0.000380528	up
FBgn0264006	4.08107	0.0347219	0.000408031	dysc
FBgn0039927	1.53776	0.0362273	0.000432079	CG11155
FBgn0027572	0.658019	0.0362273	0.000433909	CG5009
FBgn0036165	-0.684038	0.0368652	0.000445715	chrb
FBgn0010041	1.53122	0.0372195	0.00045555	GstD5
FBgn0038440	1.45325	0.0372195	0.000459072	Gr89a
FBgn0028424	0.737497	0.0372195	0.000462615	JhI-26
FBgn0034156	1.31032	0.037394	0.00046901	CG5348
FBgn0037844	1.90718	0.0383659	0.000485535	CG4570
FBgn0026592	1.58246	0.0386175	0.000493082	Fie
FBgn0052582	3.01876	0.0393299	0.000506622	CR32582
FBgn0030246	0.65911	0.0395429	0.000513835	CG1582
FBgn0040251	0.607734	0.0395738	0.000518707	Ugt86Di
FBgn0267252	3.91873	0.0404299	0.000534497	Ggamma30A
FBgn0037630	3.98204	0.0408142	0.00054419	Ir85a
FBgn0086359	1.24692	0.0411143	0.000552836	Invadolysin
FBgn0014018	0.730753	0.0411806	0.000565968	Rel
FBgn0086898	1.57485	0.0411806	0.000569303	dgo
FBgn0263980	3.44786	0.0411806	0.00057468	CG43729
FBgn0031306	3.19055	0.0411806	0.000574953	CG4577
FBgn0052103	0.551621	0.0411806	0.000578217	CG32103
FBgn0000355	3.51452	0.0411806	0.000581647	Cp15
FBgn0038842	1.03929	0.0413134	0.000588191	hdly
FBgn0026403	4.10724	0.0420091	0.000611604	Ndg
FBgn0034931	1.02904	0.0420091	0.000611798	CG2812
FBgn0029969	-0.558917	0.0420091	0.000612336	CG10932
FBgn0033174	0.836408	0.0434139	0.000637718	CG11125
FBgn0035907	-0.984564	0.0449057	0.000664706	GstO1
FBgn0024244	0.552589	0.0449773	0.000670847	drm
FBgn0058160	-0.976286	0.0454026	0.00068696	CG40160
FBgn0069969	3.82577	0.0454026	0.000687452	CG40498
FBgn0030309	-0.763986	0.0458985	0.000705162	CG1572
FBgn0039972	4.13772	0.0458985	0.000705333	CG17018
FBgn0052436	4.05095	0.0480847	0.000744362	CG32436
FBgn0003996	-0.516749	0.0482593	0.000752518	w
FBgn0036316	-0.838694	0.0500515	0.00078612	CG10960
FBgn0033188	-1.04725	0.0500964	0.000793915	Drat
FBgn0033453	0.538237	0.0500964	0.00080307	CG1667
FBgn0038953	0.87936	0.0500964	0.000803807	CG18596
FBgn0040071	0.691448	0.0502731	0.000812323	tara
FBgn0031461	2.42671	0.0509271	0.000830572	daw
FBgn0043364	-0.971792	0.0509271	0.000834399	cbt
FBgn0019650	2.75709	0.0512542	0.000845549	toy
FBgn0034271	0.546847	0.0523031	0.000868763	CG4996
FBgn0028482	1.3929	0.0541989	0.000914564	CG16857
FBgn0034694	0.541983	0.0541989	0.000915061	CG6613
FBgn0001220	-0.502915	0.0541989	0.000918626	Hsc70-5
FBgn0063497	1.10728	0.0543504	0.000936087	GstE3
FBgn0003963	1.11214	0.0543504	0.000939823	ush
FBgn0053294	3.72839	0.0543504	0.000940114	CR33294
FBgn0039277	2.10606	0.0543504	0.000945758	CG13650
FBgn0030638	1.24535	0.0550162	0.000974535	CG11655
FBgn0033134	-0.499883	0.0550162	0.000976686	Tsp42El
FBgn0028988	1.1305	0.0550162	0.000979023	Spn42Dd
FBgn0038118	-0.771352	0.0550162	0.00098221	timeout
FBgn0051793	0.777974	0.0551626	0.00099688	CG31793
FBgn0034067	0.820795	0.0551626	0.001002	CG8399
FBgn0033221	1.05915	0.0551626	0.00100352	CG12825
FBgn0264960	2.548	0.0553331	0.00101288	CR44129
FBgn0265901	0.689834	0.056773	0.00104565	CR44690
FBgn0261802	-0.78655	0.0576544	0.0010684	CG42748
FBgn0035586	-0.509765	0.057841	0.00107839	CG10671
FBgn0036627	1.22751	0.0583102	0.00109373	Grp
FBgn0031305	3.26315	0.0588399	0.00111031	Iris
FBgn0032602	4.20035	0.0590523	0.00112099	ppk17
FBgn0266417	-1.0177	0.0593668	0.00113367	CG45057
FBgn0250876	-0.783266	0.060274	0.00115781	Sema-5c
FBgn0030189	0.96384	0.0604051	0.00116715	CG2909
FBgn0262631	1.89299	0.0606911	0.00118124	CR43148
FBgn0028331	0.596628	0.0606911	0.001193	l(1)G0289
FBgn0035953	0.597454	0.0606911	0.00119896	CG5087
FBgn0010042	3.04617	0.0606911	0.00120011	GstD6
FBgn0029588	0.921935	0.061067	0.00121444	CG14798
FBgn0259740	-0.84231	0.0619392	0.00123878	CG42394
FBgn0060296	-0.441462	0.0628975	0.00126506	pain
FBgn0003390	0.624422	0.0647195	0.00130901	shf
FBgn0263981	0.896527	0.0650463	0.00132297	CR43730
FBgn0051974	-0.795051	0.0663403	0.00135679	CG31974
FBgn0025630	0.507212	0.0690443	0.00141989	CG4061
FBgn0039828	-0.605812	0.0694788	0.00144144	CG1542
FBgn0019643	0.744884	0.0694788	0.00144453	Dat
FBgn0031643	0.730996	0.0695815	0.00145453	CG3008
FBgn0038344	0.866215	0.0711335	0.00150198	CG5205
FBgn0038681	0.862519	0.0711335	0.0015107	Cyp12a4
FBgn0260655	0.641614	0.0711335	0.00151108	l(3)76BDm
FBgn0000246	1.10762	0.0716812	0.00153082	c(3)G
FBgn0033935	0.559622	0.0741704	0.00159236	Sin1
FBgn0034390	-0.713538	0.0746245	0.00161054	CG15093
FBgn0040918	-0.458534	0.075573	0.00163955	schlank
FBgn0028479	-0.445759	0.0779581	0.0017001	Mtpalpha
FBgn0038088	1.08358	0.0785673	0.00172227	CG10126
FBgn0034971	-0.368593	0.078973	0.00175106	CG3209
FBgn0038404	1.40413	0.078973	0.00175669	CG8925
FBgn0012051	0.537247	0.078973	0.00176476	CalpA
FBgn0036213	-0.620659	0.078973	0.00176813	RpL10Ab
FBgn0052040	1.21666	0.078973	0.00177578	CG32040
FBgn0010786	0.507738	0.079151	0.00178935	l(3)02640
FBgn0041713	0.686369	0.079151	0.00179767	yellow-c
FBgn0038964	-0.427108	0.0792514	0.0018089	Nop56
FBgn0053494	3.48888	0.079987	0.00183473	CG33494
FBgn0015286	-0.444252	0.0815311	0.00187936	Rala
FBgn0261530	0.409067	0.0826218	0.00192424	nbs
FBgn0035087	-0.637223	0.0826218	0.00193089	CG2765
FBgn0031516	0.594646	0.0826218	0.00193251	CG9663
FBgn0015801	0.845721	0.0828442	0.00194707	Reg-5
FBgn0003502	0.731284	0.0837586	0.00197803	Btk29A
FBgn0027836	0.447822	0.0847939	0.00201206	Dgp-1
FBgn0004893	-1.03268	0.0881141	0.0021008	bowl
FBgn0034797	1.17132	0.0881669	0.00211202	nahoda
FBgn0022359	2.17689	0.0888237	0.00215067	Sodh-2
FBgn0039635	-0.47879	0.0888237	0.0021584	CG11876
FBgn0003360	-0.489092	0.0888237	0.00216404	sesB
FBgn0030294	-0.759437	0.0888237	0.00217259	Pa1
FBgn0086254	-0.4626	0.0888237	0.00217794	CG6084
FBgn0026196	-0.380888	0.0905391	0.00223896	nop5
FBgn0038330	1.11736	0.0905391	0.00224046	CG14868
FBgn0013342	1.88867	0.0907556	0.00225607	nSyb
FBgn0028879	3.66119	0.0908681	0.00228157	CG15270
FBgn0033809	1.80041	0.0908681	0.00228637	CG4630
FBgn0012036	-0.552999	0.0908681	0.00228967	Aldh
FBgn0004118	3.4955	0.0922591	0.00234445	nAChRbeta2
FBgn0039644	1.75244	0.0922591	0.00236746	CG11897
FBgn0038815	1.17793	0.0922591	0.00237153	CG5466
FBgn0031630	-2.25004	0.0922591	0.0023737	CG15629
FBgn0027280	0.386916	0.0922591	0.00237684	l(1)G0193
FBgn0262843	2.10794	0.0944775	0.00244467	CG43207
FBgn0037153	2.29559	0.0945777	0.00246428	olf413
FBgn0010407	1.32626	0.0945777	0.00247726	Ror
FBgn0051547	2.25519	0.0945777	0.00247932	CG31547
FBgn0032679	-0.33849	0.0947544	0.00249466	bsf
FBgn0261113	0.58743	0.0957172	0.00253083	Xrp1
FBgn0027660	1.01848	0.0967347	0.00257059	blot
FBgn0026761	-0.374592	0.0967347	0.00257959	Trap1
FBgn0264449	0.897425	0.0968567	0.0025975	CG43867
FBgn0031894	1.16159	0.0968567	0.00260473	CG4496
FBgn0039647	2.87309	0.0978345	0.00264923	CG14509
FBgn0002780	-0.426013	0.0978345	0.00265314	mod
FBgn0040227	-0.413942	0.0987662	0.00269627	eIF-3p66
FBgn0035806	0.694947	0.0987662	0.00270692	PGRP-SD
FBgn0000346	-1.98208	0.0987662	0.00272304	comt
FBgn0030484	-1.24099	0.0987662	0.00272305	GstT4
FBgn0010435	1.1304	0.0995021	0.00276468	emp
FBgn0034950	1.73554	0.0995021	0.00276582	Pask
FBgn0038890	0.448987	0.0995406	0.00277814	CG7956
FBgn0000043	-0.683823	0.100017	0.00280272	Act42A
FBgn0032666	0.95583	0.100219	0.00281972	CG5758
FBgn0037622	0.679204	0.100223	0.0028326	CG8202
FBgn0030904	0.868488	0.100223	0.00284343	upd2
FBgn0023129	-1.06994	0.100223	0.00285382	aay
FBgn0040364	-0.463923	0.100617	0.00288637	CG11378
FBgn0265186	0.477772	0.100617	0.00290431	CG44251
FBgn0039877	-0.460965	0.100617	0.00291027	CG2118
FBgn0004595	1.40667	0.100617	0.00291051	pros
FBgn0039900	1.55349	0.100744	0.00292557	Syt7
FBgn0046214	-0.396305	0.101909	0.00297574	vig2
FBgn0267727	-0.868573	0.101909	0.00298871	Pen
FBgn0263397	-0.465762	0.101909	0.00299394	Ih
FBgn0032656	0.470651	0.103564	0.0030725	CG5674
FBgn0004364	-0.85422	0.103564	0.00307584	18w
FBgn0029838	1.30278	0.103564	0.00307767	CG4666
FBgn0004629	0.68888	0.103763	0.0030953	Cys
FBgn0042627	2.25024	0.10442	0.00314486	v(2)k05816
FBgn0001125	-0.466633	0.10442	0.00315864	Got2
FBgn0004055	0.906359	0.10442	0.00317834	uzip
FBgn0052971	2.03575	0.10442	0.0031801	CG32971
FBgn0086704	1.92491	0.10442	0.00320565	stops
FBgn0027111	0.812226	0.10442	0.00320614	miple
FBgn0036141	0.380617	0.10442	0.0032297	wls
FBgn0033502	0.672859	0.10442	0.00323365	CG12910
FBgn0001230	-2.00017	0.10442	0.00323957	Hsp68
FBgn0034391	3.45948	0.10442	0.00324307	CG15080
FBgn0023537	-0.381004	0.10442	0.0032447	CG17896
FBgn0029882	-0.548182	0.106205	0.00331214	CG3226
FBgn0010038	1.29996	0.107328	0.0033593	GstD2
FBgn0050022	0.841284	0.108741	0.00343094	CG30022
FBgn0264979	1.03276	0.108741	0.00343552	CG4267
FBgn0040351	1.96614	0.108741	0.00344039	CG11638
FBgn0065098	1.66332	0.109593	0.00347973	RNaseMRP:RNA
FBgn0004108	0.766379	0.109877	0.00350117	Nrt
FBgn0015399	1.91768	0.109941	0.00351564	kek1
FBgn0032075	1.02094	0.110763	0.0035554	Tsp29Fb
FBgn0262560	-0.72802	0.110763	0.0035745	wcd
FBgn0003204	-0.389349	0.110763	0.00357945	ras
FBgn0051473	0.749996	0.111522	0.00361657	CG31473
FBgn0267033	0.610503	0.111766	0.00363712	mamo
FBgn0266758	3.35589	0.114742	0.00374948	Esyt2
FBgn0038989	-0.445961	0.114742	0.00376346	CG6937
FBgn0015351	0.707351	0.114742	0.00380615	CG14906
FBgn0038292	0.702576	0.114742	0.00380998	CG3987
FBgn0029689	0.426811	0.114742	0.00382244	CG6428
FBgn0005586	2.14045	0.114742	0.00383851	Rab3
FBgn0267728	1.29565	0.114742	0.00384365	otk2
FBgn0004133	0.8861	0.114742	0.00385316	blow
FBgn0040765	-1.3033	0.114742	0.00386986	luna
FBgn0039321	1.56888	0.114742	0.0038738	CG10550
FBgn0028863	3.63557	0.114742	0.0038766	CG4587
FBgn0010549	0.97419	0.114832	0.00389982	l(2)03659
FBgn0260745	-1.55239	0.114832	0.00390559	mfas
FBgn0262559	-0.414132	0.115953	0.00395682	Mdh2
FBgn0035649	3.28046	0.116767	0.00400899	CG10483
FBgn0031317	0.470129	0.116767	0.00402314	CG5118
FBgn0003016	-0.772572	0.116767	0.00402417	osp
FBgn0038110	0.53468	0.117257	0.00406264	CG8031
FBgn0023511	0.447821	0.117257	0.00406757	Edem1
FBgn0038530	2.34079	0.117917	0.00412131	AttD
FBgn0266111	0.945037	0.117917	0.00413071	ana3
FBgn0052512	-0.920161	0.117917	0.00415704	CG32512
FBgn0264679	-0.701275	0.117917	0.00417145	CR43964
FBgn0052368	1.088	0.117917	0.0041738	CG32368
FBgn0033479	0.696321	0.117917	0.00418378	CG2292
FBgn0034184	0.441224	0.117917	0.00419076	CG9646
FBgn0036742	0.89766	0.117917	0.00419704	CG7497
FBgn0034396	1.88565	0.118821	0.0042546	CG15097
FBgn0042104	0.965612	0.118821	0.00425609	CG18747
FBgn0030411	0.611048	0.121796	0.00437641	CG2540
FBgn0015372	0.491226	0.12226	0.00440945	RabX1
FBgn0263200	-0.441222	0.12226	0.00442072	Galt
FBgn0035094	1.16831	0.124039	0.00449903	CG9380
FBgn0266581	-0.338707	0.124514	0.00453035	pit
FBgn0015038	0.876054	0.124837	0.00455619	Cyp9b1
FBgn0031968	-0.523548	0.125426	0.00459443	CG7231
FBgn0040294	0.544656	0.125426	0.0046221	POSH
FBgn0262782	-0.428529	0.125426	0.00464031	Mdh1
FBgn0034740	1.44849	0.125426	0.00464385	nsr
FBgn0015714	0.827532	0.125426	0.00464854	Cyp6a17
FBgn0003448	1.16561	0.126928	0.00471857	sna
FBgn0086251	0.845291	0.127267	0.00476455	del
FBgn0032018	0.455208	0.127267	0.0047662	CG7806
FBgn0033889	0.45235	0.127267	0.00477579	CG6701
FBgn0051548	-0.58615	0.127267	0.00479919	CG31548
FBgn0032891	1.43584	0.127267	0.0048273	Oseg5
FBgn0036485	0.692853	0.127267	0.00483359	FucTA
FBgn0003885	-0.427915	0.127267	0.00484558	alphaTub84D
FBgn0265003	-0.486505	0.127267	0.00486412	koi
FBgn0032200	-0.529341	0.127267	0.00488688	CG5676
FBgn0051875	1.10462	0.127267	0.00489062	CG31875
FBgn0031945	2.10675	0.127267	0.00492316	CG7191
FBgn0038585	-0.436004	0.127267	0.00492458	Non3
FBgn0038601	-0.459262	0.127267	0.00493736	CG18600
FBgn0263510	-0.488683	0.127267	0.00494606	nclb
FBgn0037408	2.34401	0.127267	0.00494689	NPFR
FBgn0001225	-1.67073	0.129869	0.00506268	Hsp26
FBgn0040397	0.931035	0.130182	0.00508959	CG3655
FBgn0052745	2.09515	0.130283	0.00510826	CR32745
FBgn0040348	0.831979	0.130731	0.00515762	CG3703
FBgn0030289	0.340296	0.130731	0.00517492	CG1597
FBgn0037391	0.574255	0.130731	0.00518756	CG2017
FBgn0004888	-0.361612	0.130731	0.00519472	Scsalpha
FBgn0052091	0.520449	0.130731	0.00519969	CG32091
FBgn0035880	1.23305	0.131597	0.00524901	CG17352
FBgn0030720	-0.388727	0.131791	0.00529175	CG8939
FBgn0267551	1.40054	0.131791	0.00529509	CR45891
FBgn0014022	-0.611326	0.131791	0.00530141	Rlb1
FBgn0034437	2.41198	0.131816	0.0053236	CG10051
FBgn0001977	0.385213	0.131816	0.00533223	CIAPIN1
FBgn0266324	-0.840527	0.131914	0.00535479	CR44989
FBgn0039156	-0.404034	0.131914	0.00537947	CG6178
FBgn0026418	-0.407137	0.131914	0.0053809	Hsc70Cb
FBgn0033458	1.34828	0.132167	0.00540615	CG18446
FBgn0024321	0.374095	0.132725	0.00544396	NK7.1
FBgn0264904	0.605366	0.132849	0.00546408	CR44095
FBgn0015011	0.690303	0.133752	0.00554168	Ahcy89E
FBgn0011576	0.787605	0.133752	0.00554311	Cyp4d2
FBgn0034072	-0.470419	0.133752	0.00554655	Dg
FBgn0267073	0.85247	0.134134	0.00557754	CR45517
FBgn0034935	3.30113	0.135134	0.00563438	CG13565
FBgn0027657	-0.622128	0.135658	0.00567158	glob1
FBgn0262728	1.62492	0.135688	0.00568817	Pal2
FBgn0030511	-0.58637	0.137002	0.00575872	CG11158
FBgn0035064	-0.489956	0.137305	0.00578697	Aats-tyr-m
FBgn0038365	1.14263	0.13739	0.0058061	CG9593
FBgn0259112	0.590383	0.137492	0.00582595	CR42254
FBgn0038083	2.47152	0.137835	0.00587666	CG5999
FBgn0050147	0.669785	0.137835	0.00587879	Hil
FBgn0037000	1.76637	0.137835	0.00588718	ZnT77C
FBgn0039225	-0.99489	0.138258	0.00592493	Ets96B
FBgn0038674	1.31705	0.138258	0.00594876	CG14285
FBgn0035246	1.19708	0.138258	0.0059521	CG13928
FBgn0032791	0.652294	0.138949	0.00600289	CG18094
FBgn0035266	0.516541	0.138949	0.00602163	Gk
FBgn0046225	0.498299	0.138949	0.00602896	CG17230
FBgn0042103	0.867915	0.139262	0.00605829	CG18746
FBgn0040493	-0.412167	0.139373	0.00607886	grsm
FBgn0033226	0.411139	0.139509	0.00610054	CG1882
FBgn0260755	0.661767	0.141457	0.00620938	CG42553
FBgn0001226	-1.98108	0.141457	0.00622696	Hsp27
FBgn0266752	1.2315	0.141457	0.00623371	CR45225
FBgn0031170	0.594476	0.14353	0.00636371	CG1718
FBgn0034403	1.62759	0.14353	0.00636559	CG18190
FBgn0010105	-0.746528	0.14353	0.00637372	comm
FBgn0028670	-0.415634	0.143559	0.00639124	Vha100-2
FBgn0027518	0.448996	0.143587	0.00641668	CG7609
FBgn0004242	2.05276	0.143587	0.00643716	Syt1
FBgn0260456	-0.462929	0.143587	0.00644116	CG4806
FBgn0030343	0.410042	0.143876	0.00647037	ATP7
FBgn0029766	0.557027	0.144936	0.00654894	CG15784
FBgn0039064	3.22572	0.144936	0.00655079	CG4467
FBgn0000042	-0.390259	0.14523	0.00658048	Act5C
FBgn0029834	2.15741	0.1459	0.00662732	CG5937
FBgn0000146	2.46334	0.147712	0.00674184	aub
FBgn0034756	1.58116	0.147712	0.00674301	Cyp6d2
FBgn0039508	0.49682	0.147726	0.00682972	CG3368
FBgn0038042	1.50314	0.147726	0.00683581	Scgbeta
FBgn0035861	0.814148	0.147726	0.00684747	CG7213
FBgn0263316	0.674239	0.147726	0.00686182	Mrp4
FBgn0052537	0.510126	0.147726	0.00686686	CG32537
FBgn0037810	-0.494693	0.147726	0.00686966	sle
FBgn0266644	0.477853	0.147726	0.00687349	CR45151
FBgn0038975	1.93787	0.147726	0.00687718	Nrx-1
FBgn0026189	0.615961	0.147909	0.00691552	prominin-like
FBgn0037517	1.00229	0.147909	0.00692255	CG10086
FBgn0039205	0.848266	0.147909	0.00693585	CG13623
FBgn0039674	-0.41769	0.14855	0.0069827	CG1907
FBgn0020618	-0.649229	0.148561	0.007	Rack1
FBgn0003525	-0.951837	0.149004	0.00703769	stg
FBgn0029672	-0.466591	0.149609	0.0070832	CG2875
FBgn0035542	-0.449815	0.149633	0.00711444	DOR
FBgn0039462	0.819159	0.149633	0.00711814	CG14252
FBgn0038659	0.414488	0.150141	0.00715928	EndoA
FBgn0051122	0.433378	0.150506	0.00719367	CG31122
FBgn0034817	0.345596	0.151497	0.00728101	Art7
FBgn0030237	-0.74327	0.151497	0.00729687	CG15209
FBgn0051785	-3.43573	0.151497	0.00729744	CG31785
FBgn0086855	0.375534	0.151497	0.0073143	CG17078
FBgn0043853	0.943124	0.151497	0.00732661	scaRNA:MeU5-C46
FBgn0037026	0.417211	0.152541	0.00740783	CG3634
FBgn0000579	-0.364988	0.152541	0.00741161	Eno
FBgn0037270	-0.363385	0.152954	0.00744895	CG9769
FBgn0000542	1.10284	0.153073	0.00747589	ec
FBgn0002609	0.508084	0.153073	0.007519	E(spl)m3-HLH
FBgn0259937	-0.350295	0.153073	0.00752411	Nop60B
FBgn0035557	0.697656	0.153073	0.00753004	CG11353
FBgn0036984	2.40791	0.153073	0.00754261	CG13248
FBgn0032336	1.81897	0.153073	0.00755853	AstC
FBgn0026376	0.636496	0.153416	0.00760478	Rgl
FBgn0035888	1.92577	0.153416	0.00761013	CG7120
FBgn0020633	-0.593977	0.153682	0.00764542	Mcm7
FBgn0033372	0.516429	0.153682	0.00767482	CG13742
FBgn0038660	1.37828	0.153682	0.00768578	CG14291
FBgn0034704	0.361472	0.153682	0.0076928	CG6758
FBgn0036857	0.809019	0.154576	0.00777365	CG9629
FBgn0004512	1.7632	0.154576	0.00777454	Mdr49
FBgn0032929	-1.56917	0.154576	0.00779898	Mcm10
FBgn0038519	-0.468636	0.154576	0.00782723	Prx3
FBgn0026409	-0.438662	0.154576	0.0078363	Mpcp
FBgn0037742	1.58391	0.154576	0.00784232	Rpt3R
FBgn0046296	0.45636	0.154851	0.0078738	CG11534
FBgn0034507	1.32396	0.15526	0.00793486	CG11192
FBgn0029994	-1.69253	0.15526	0.0079393	CG2254
FBgn0019960	-0.337937	0.15526	0.00796239	CG6455
FBgn0050106	3.29018	0.15526	0.00796476	CCHa1-R
FBgn0085407	1.90526	0.156139	0.00802749	Pvf3
FBgn0038536	-0.456112	0.156621	0.00809792	CG7655
FBgn0036713	1.72384	0.156621	0.00810072	Mip
FBgn0010213	-0.404729	0.156621	0.00810538	Sod2
FBgn0000405	-0.562125	0.156704	0.00814275	CycB
FBgn0050043	-0.663508	0.156704	0.00815174	CG30043
FBgn0036419	0.846459	0.156704	0.0081628	CG13482
FBgn0002973	0.357067	0.157405	0.00823482	numb
FBgn0037138	0.578176	0.157405	0.00823483	P5CDh1
FBgn0037891	-0.370635	0.15773	0.0082697	CG5214
FBgn0266672	0.40654	0.158074	0.00832688	Sec8
FBgn0032774	1.94792	0.158074	0.00835051	CG17549
FBgn0019644	-0.463902	0.158074	0.00836696	ATPsyn-b
FBgn0261090	2.07629	0.158074	0.00840904	Sytbeta
FBgn0262476	1.37846	0.158074	0.00841337	CG43066
FBgn0034371	0.654165	0.158074	0.00842054	SP2637
FBgn0035707	-0.461108	0.158074	0.00842543	CG8368
FBgn0030628	0.494311	0.158074	0.00843063	CG9114
FBgn0041629	0.797634	0.15885	0.00848995	Hexo2
FBgn0025815	-0.492316	0.159237	0.00852861	Mcm6
FBgn0033879	-0.398695	0.159278	0.00854883	CG6543
FBgn0001233	-0.636857	0.159316	0.00860237	Hsp83
FBgn0032955	-0.303323	0.159316	0.00861131	CG2201
FBgn0020616	0.348069	0.159316	0.00862187	SA
FBgn0263133	-0.665021	0.159316	0.00863984	ico
FBgn0004516	3.5834	0.159316	0.00864086	Gad1
FBgn0266428	0.601934	0.159617	0.00867522	CR43463
FBgn0010247	-0.352924	0.160527	0.00874311	Parp
FBgn0004859	-4.15742	0.160527	0.00878278	ci
FBgn0020307	0.620508	0.160527	0.00879598	dve
FBgn0263132	-3.56348	0.160527	0.00879722	Cht6
FBgn0000108	1.50098	0.160779	0.0088292	Appl
FBgn0259682	-0.521575	0.160822	0.00884975	Jabba
FBgn0266705	1.94588	0.16121	0.00888934	CR45195
FBgn0010100	-0.37989	0.161855	0.00894318	Acon
FBgn0030878	-0.386479	0.161965	0.00896755	CG6769
FBgn0037073	-0.310065	0.161989	0.00898721	CG7338
FBgn0267429	1.57916	0.162341	0.00902507	CG45782
FBgn0053126	0.734531	0.165245	0.00920518	NLaz
FBgn0003062	-0.455682	0.165473	0.00923658	Fib
FBgn0266626	0.646589	0.165667	0.00926615	CR45133
FBgn0039474	3.21502	0.166028	0.00930505	CG6283
FBgn0043043	1.47077	0.167499	0.00942522	Desat2
FBgn0005655	-0.583473	0.167499	0.00942534	PCNA
FBgn0029823	-0.333275	0.167918	0.0094679	CG3011
FBgn0040360	0.684645	0.168587	0.00952577	CG14626
FBgn0031815	-0.423178	0.168587	0.00954376	frj
FBgn0035588	-0.457462	0.168712	0.00959162	CG10672
FBgn0036551	-0.873248	0.168712	0.00959971	CG17029
FBgn0001224	-1.92594	0.168712	0.00961687	Hsp23
FBgn0001079	0.459413	0.168712	0.00962708	fu
FBgn0015924	-0.418422	0.168917	0.00965788	crq
FBgn0264975	-0.517946	0.169142	0.00968984	Nrg
FBgn0026309	0.457536	0.169419	0.00972483	aft
FBgn0263740	-0.301606	0.169437	0.00974504	eIF-2gamma
FBgn0020372	1.6576	0.169798	0.00978932	TM4SF
FBgn0038498	0.439961	0.169798	0.00980418	beat-IIa
FBgn0024887	-0.454747	0.169859	0.00984575	kin17
FBgn0261562	0.39674	0.169859	0.00984609	CG42676
FBgn0026878	-0.72907	0.171373	0.00997015	CG4325
FBgn0029924	-2.81525	0.171373	0.00997254	CG4586
FBgn0263236	1.98611	0.171879	0.0100378	SP1029
FBgn0029861	0.310428	0.171879	0.0100408	CG3815
FBgn0002023	0.628164	0.172343	0.0101105	Lim3
FBgn0265961	0.94881	0.172343	0.0101137	CR44748
FBgn0022069	-0.343071	0.172343	0.0101264	Nnp-1
FBgn0032428	1.9351	0.172464	0.0101529	CG6405
FBgn0013278	0.798693	0.172475	0.0101731	Hsp70Bb
FBgn0004106	-0.63578	0.172883	0.0102303	Cdk1
FBgn0038196	-0.533832	0.172883	0.0102362	CG9922
FBgn0024556	-0.37439	0.17339	0.0102859	EfTuM
FBgn0015550	2.28161	0.173602	0.010318	tap
FBgn0005666	2.61439	0.174569	0.0104093	bt
FBgn0052137	1.15631	0.174569	0.010415	CG32137
FBgn0003495	1.22575	0.174574	0.0104506	spz
FBgn0030574	1.30112	0.174574	0.0104547	CG9413
FBgn0267531	-0.613306	0.175199	0.010512	CR45871
FBgn0265532	0.650026	0.17637	0.0106044	CR44382
FBgn0050035	0.556263	0.17637	0.010622	Tret1-1
FBgn0050460	0.451389	0.17701	0.0106886	CG30460
FBgn0033059	-0.413461	0.17701	0.0107006	CG7845
FBgn0266124	-0.449748	0.177107	0.0107265	ghi
FBgn0267552	0.525952	0.177725	0.0107975	CR45892
FBgn0038427	0.336655	0.177725	0.0108202	ema
FBgn0039629	2.8886	0.177725	0.0108595	CG11842
FBgn0011824	-0.517062	0.177725	0.0108711	CG4038
FBgn0029608	1.72034	0.177725	0.0108972	CG3091
FBgn0260388	-0.788676	0.177725	0.0108984	CG42514
FBgn0033945	1.00573	0.177725	0.0109045	CG12868
FBgn0260995	1.08138	0.178709	0.0109959	CG42596
FBgn0032814	0.398461	0.178709	0.0110053	CG10366
FBgn0035677	2.32316	0.179202	0.0110558	CG13293
FBgn0051431	-0.739175	0.180327	0.0111601	CG31431
FBgn0038070	2.39617	0.180327	0.0111721	CG6753
FBgn0262149	0.937111	0.180327	0.011204	CR42875
FBgn0250907	1.86812	0.180327	0.0112068	Cht3
FBgn0028744	-0.297547	0.18055	0.0112483	CG5033
FBgn0032521	-0.528939	0.18055	0.0112614	CG7110
FBgn0039226	-0.927942	0.18147	0.0113393	Ude
FBgn0033501	-2.79649	0.181793	0.01138	CG12911
FBgn0015527	-0.360584	0.182093	0.011438	pen
FBgn0036754	-0.450324	0.182093	0.0114399	CG5589
FBgn0032198	-0.37351	0.182902	0.0115244	eEF1delta
FBgn0033485	-0.323492	0.182902	0.0115505	RpLP0-like
FBgn0024352	-0.394341	0.182902	0.0115666	Hop
FBgn0267348	-0.361344	0.182902	0.0115735	LanB2
FBgn0002174	-0.311674	0.184593	0.0117013	l(2)tid
FBgn0263345	3.04437	0.185699	0.011832	CR43426
FBgn0003189	0.484106	0.185699	0.011853	r
FBgn0034047	1.51261	0.185699	0.0118608	CG12970
FBgn0041241	2.81101	0.185699	0.0118756	Gr47b
FBgn0037580	-0.327509	0.185699	0.0118764	DppIII
FBgn0028496	2.23834	0.188089	0.012087	CG30116
FBgn0026593	0.70972	0.188089	0.0120998	CG5707
FBgn0037709	-0.291835	0.188089	0.0121231	CG8199
FBgn0037697	2.32128	0.188089	0.0121356	GstZ2
FBgn0038453	-0.376978	0.188089	0.012146	CG10326
FBgn0263584	-1.70081	0.188089	0.0121672	CR43609
FBgn0032242	-0.308275	0.188089	0.0122054	CG5355
FBgn0265345	1.2049	0.188089	0.0122083	CR44299
FBgn0004363	-0.356555	0.188089	0.0122279	porin
FBgn0025742	-0.279489	0.188089	0.0122464	mtm
FBgn0030509	1.61225	0.188089	0.012263	CG11162
FBgn0037351	-0.525149	0.190217	0.0124249	RpL13A
FBgn0053346	2.21735	0.190217	0.0124459	CG33346
FBgn0033465	-0.363597	0.190217	0.0124662	Etf-QO
FBgn0034670	-0.387838	0.190809	0.0125409	CG13488
FBgn0032487	-0.955086	0.190809	0.0125481	Ski6
FBgn0261606	-0.486337	0.190854	0.0125726	RpL27A
FBgn0001942	-0.481423	0.191354	0.0126272	eIF-4a
FBgn0001991	2.90041	0.191726	0.0126734	Ca-alpha1D
FBgn0035948	1.95313	0.192548	0.0127495	CG5644
FBgn0259214	-0.395225	0.192936	0.0128324	PMCA
FBgn0030686	-0.43306	0.192936	0.0128378	mRpL3
FBgn0036147	0.585966	0.192936	0.0128728	Plod
FBgn0031476	1.55583	0.192936	0.0128889	CG8813
FBgn0267241	-2.06965	0.192936	0.0128975	CR45681
FBgn0036484	0.345252	0.192936	0.0129114	Pex3
FBgn0083952	0.525246	0.192936	0.0129278	CG34116
FBgn0033342	-0.362546	0.193069	0.0129741	CG8258
FBgn0010621	-0.35367	0.193069	0.0129803	Cct5
FBgn0262716	-0.349202	0.19339	0.0130401	Arp3
FBgn0032961	-0.392779	0.19339	0.0130456	CG1416
FBgn0029502	-0.354079	0.193509	0.0130755	COQ7
FBgn0032897	1.47069	0.194352	0.0131834	CG9336
FBgn0032001	0.498188	0.194352	0.013186	CG8360
FBgn0035901	-0.697427	0.194352	0.013207	CG6745
FBgn0034724	-0.459969	0.194352	0.0132249	babos
FBgn0035336	-0.521497	0.194352	0.0132696	CG9004
FBgn0039857	-0.563584	0.194352	0.0132846	RpL6
FBgn0002932	0.494773	0.194352	0.0132862	neur
FBgn0029128	0.941053	0.194743	0.0133349	tyn
FBgn0023179	2.23896	0.197971	0.0135784	amon
FBgn0037926	0.446063	0.19798	0.0136013	Elp1
FBgn0038608	-0.710758	0.198053	0.0136287	WRNexo
FBgn0004198	2.64362	0.198729	0.0137177	ct
FBgn0031604	-0.386342	0.198729	0.0137356	Elp3
FBgn0029648	-0.626183	0.198729	0.0137634	CG3603
FBgn0039172	-0.511373	0.198729	0.0137707	Spase22-23
FBgn0032021	0.998183	0.198729	0.0137876	CG7781
FBgn0024183	-0.349214	0.198922	0.0138415	vig
FBgn0035473	-0.305808	0.198922	0.0138459	mge
FBgn0037529	-0.440902	0.200289	0.0139637	mRpS9
FBgn0035499	-0.330691	0.200587	0.0140071	Chd64
FBgn0032782	-0.412152	0.200846	0.0140479	Rab9
FBgn0063298	0.473425	0.201639	0.014144	CR31429
FBgn0034237	-0.335608	0.201639	0.0141489	eIF3-S9
FBgn0011648	-0.364399	0.201714	0.0141907	Mad
FBgn0033153	0.705146	0.201714	0.0141998	Gadd45
FBgn0030230	1.32289	0.20244	0.0142737	Rph
FBgn0017566	-0.305009	0.20255	0.0143044	ND75
FBgn0035060	0.332837	0.204518	0.0144665	Eps-15
FBgn0035704	0.321472	0.206927	0.0146668	CG10144
FBgn0038145	-0.280001	0.206927	0.0146837	Droj2
FBgn0002633	1.07204	0.207709	0.0147812	E(spl)m7-HLH
FBgn0035421	0.430773	0.207709	0.0148432	CG12034
FBgn0037728	-0.320041	0.207709	0.014847	CG16817
FBgn0025456	0.897215	0.207709	0.0148551	CREG
FBgn0004556	-0.338271	0.207709	0.0148565	Dbp73D
FBgn0029174	-0.306322	0.208319	0.0149237	FKBP59
FBgn0015268	-0.276892	0.20911	0.01501	Nap1
FBgn0026143	-0.309857	0.20911	0.0150322	CDC45L
FBgn0039818	-0.480221	0.20911	0.0150742	CG11318
FBgn0035977	0.500091	0.20911	0.0150748	PGRP-LF
FBgn0030954	2.36436	0.210104	0.0151705	CCKLR-17D3
FBgn0261285	0.464532	0.210104	0.015194	Ppcs
FBgn0264987	1.39939	0.210768	0.0152658	CR44138
FBgn0035083	-0.37855	0.210933	0.0153016	Tina-1
FBgn0046247	0.349977	0.212851	0.0154803	CG5938
FBgn0264713	0.492968	0.212851	0.0154888	CR43981
FBgn0036126	0.490855	0.212929	0.0155254	CG6272
FBgn0024754	-0.292568	0.212929	0.0155607	Flo1
FBgn0037685	1.09441	0.212929	0.0155667	Or85f
FBgn0265182	0.991168	0.213679	0.0156456	CG44247
FBgn0014469	0.834446	0.214602	0.0157571	Cyp4e2
FBgn0053207	-0.654062	0.214602	0.0157733	pxb
FBgn0051044	0.560845	0.214602	0.015786	CR31044
FBgn0033177	0.338246	0.214758	0.0158346	CG11141
FBgn0052226	0.336504	0.214758	0.0158548	Pex23
FBgn0024947	0.310064	0.214758	0.0158702	NTPase
FBgn0029715	-0.376052	0.216923	0.0160548	CG11444
FBgn0086904	-0.455803	0.217145	0.0160958	Nacalpha
FBgn0263377	0.318215	0.217534	0.0161491	CR43429
FBgn0010750	0.263588	0.217707	0.0161866	atms
FBgn0033266	-0.455819	0.218624	0.0162795	Socs44A
FBgn0037700	-0.463144	0.219073	0.0163377	CG8149
FBgn0015019	-0.337069	0.21975	0.0164129	Cctgamma
FBgn0027580	-0.541717	0.22037	0.0164842	CG1516
FBgn0027558	0.442913	0.223133	0.0167161	pgant3
FBgn0045064	0.956545	0.223314	0.0167558	bwa
FBgn0033987	-0.755306	0.223314	0.0167801	ckn
FBgn0035756	2.15393	0.22348	0.0168346	unc-13-4A
FBgn0040319	0.351906	0.22348	0.016843	Gclc
FBgn0034117	-0.878707	0.223526	0.0168718	CG7997
FBgn0026144	1.50814	0.223895	0.0169586	CBP
FBgn0046687	0.352064	0.223895	0.0169737	Tre1
FBgn0027376	2.18893	0.223895	0.0169755	rha
FBgn0032453	-0.430826	0.223996	0.01703	CG6180
FBgn0032482	-0.351585	0.223996	0.0170338	Pect
FBgn0035476	0.872301	0.224066	0.0170645	CG12766
FBgn0029118	-0.506326	0.22407	0.0171042	Sucb
FBgn0039737	-0.454365	0.22407	0.0171263	CG7920
FBgn0032670	-0.713377	0.22407	0.0171407	CG5783
FBgn0259678	1.14214	0.225041	0.0172404	sqa
FBgn0023214	0.43088	0.225419	0.017314	edl
FBgn0003071	-0.361404	0.225419	0.0173203	Pfk
FBgn0002569	1.04461	0.226045	0.0174287	Mal-A2
FBgn0035978	0.331422	0.226045	0.0174413	UGP
FBgn0030011	1.3989	0.226045	0.0174614	Gbeta5
FBgn0035431	-0.573882	0.226045	0.0174779	CG14968
FBgn0264748	1.06137	0.226045	0.0175193	CG44006
FBgn0030085	1.19567	0.226045	0.0175217	CG6999
FBgn0010482	2.83374	0.226245	0.0175859	l(2)01289
FBgn0261636	-1.797	0.226245	0.0175883	CR42719
FBgn0262169	0.638757	0.226277	0.0176293	magu
FBgn0034346	0.539158	0.226277	0.0176419	CG12263
FBgn0013954	-0.341646	0.226581	0.0176912	FK506-bp2
FBgn0031257	1.48237	0.226612	0.0177193	CG4133
FBgn0264617	-2.74871	0.226924	0.0177759	CR43957
FBgn0002021	-0.384142	0.226924	0.0177949	l(2)37Bb
FBgn0002564	1.48843	0.227056	0.017831	Lsp1gamma
FBgn0011704	-0.536759	0.227812	0.017916	RnrS
FBgn0026084	-0.384665	0.227893	0.017952	cib
FBgn0038704	0.384962	0.227893	0.017974	CG5316
FBgn0032863	0.446487	0.22823	0.0180462	Cdc23
FBgn0039006	0.374824	0.22823	0.0180939	Cyp6d4
FBgn0034861	1.60905	0.22823	0.0181019	CG9815
FBgn0033190	1.05273	0.22823	0.0181178	CG2137
FBgn0024734	-0.273203	0.22823	0.0181295	PRL-1
FBgn0024995	-0.715153	0.229894	0.0183176	CG2680
FBgn0044872	1.50762	0.229894	0.0183212	FucTC
FBgn0031878	-0.522749	0.229894	0.0183396	sip2
FBgn0262937	0.336816	0.231839	0.0185209	Rabex-5
FBgn0035754	0.488782	0.232132	0.0185705	MED4
FBgn0267091	2.64722	0.232156	0.0186069	CR45535
FBgn0040005	0.333698	0.232156	0.0186249	CG17883
FBgn0039525	1.88706	0.232196	0.0186809	CG5646
FBgn0260750	-0.305713	0.232196	0.0187345	Mulk
FBgn0267588	-0.263619	0.232196	0.0187362	CR45926
FBgn0026370	0.285007	0.232196	0.0187386	SRPK
FBgn0025865	-0.363007	0.232196	0.0187594	Cortactin
FBgn0263601	0.404445	0.232636	0.0188211	mib1
FBgn0035911	-0.362638	0.23271	0.018863	CG6638
FBgn0067628	0.575988	0.23271	0.0188803	CG33331
FBgn0030245	-0.348013	0.23271	0.018906	CG1637
FBgn0031005	-1.97492	0.23384	0.0190698	Hs3st-B
FBgn0037911	0.449034	0.23384	0.0190863	CG10898
FBgn0013732	0.923361	0.23384	0.0191087	sced
FBgn0035189	-0.635636	0.23384	0.0191314	CG9119
FBgn0039580	-0.295908	0.23384	0.0191402	Gfat2
FBgn0264869	0.434792	0.23384	0.0191724	CR44060
FBgn0025634	-0.364701	0.23384	0.0191849	CG13367
FBgn0029685	0.281827	0.23384	0.0192092	CG2938
FBgn0031381	-0.582755	0.234817	0.0193248	Npc2a
FBgn0036306	-0.520726	0.234817	0.0193426	CG10973
FBgn0036772	-0.683875	0.235129	0.0193949	CG5290
FBgn0010217	-0.352664	0.235574	0.0194582	ATPsyn-beta
FBgn0024238	-0.428122	0.236183	0.0195575	Fim
FBgn0003676	-0.323298	0.236183	0.0195618	T-cp1
FBgn0023527	-0.389779	0.236462	0.0196324	CG3071
FBgn0261928	2.93926	0.236462	0.0196383	CG42795
FBgn0062517	0.703665	0.237237	0.019742	CG16984
FBgn0030894	0.338031	0.237237	0.0197821	CG7192
FBgn0082585	1.31649	0.237237	0.0197832	sprt
FBgn0030692	-0.296505	0.237881	0.0198637	mRpS30
FBgn0031449	-0.307166	0.239346	0.0200289	CG31689
FBgn0015393	-0.463714	0.239346	0.0200402	hoip
FBgn0036660	0.501669	0.239397	0.0200964	CG13025
FBgn0033902	-0.417002	0.239397	0.0200986	Tango7
FBgn0051248	0.788734	0.240091	0.020184	CG31248
FBgn0037715	0.594526	0.240768	0.020268	CG9399
FBgn0264386	2.92044	0.2412	0.0203316	Ca-alpha1T
FBgn0010014	1.68895	0.241572	0.0203903	CanB
FBgn0035495	1.54234	0.242166	0.0204686	CG14989
FBgn0033785	1.61576	0.242166	0.0204952	Sans
FBgn0039654	0.378436	0.242225	0.0205275	Brd8
FBgn0050495	0.718674	0.242432	0.0205724	CG30495
FBgn0039358	-0.278223	0.242773	0.0206289	CG5028
FBgn0030945	0.466938	0.24279	0.0206747	Ing3
FBgn0013279	-2.53628	0.24279	0.0206851	Hsp70Bc
FBgn0037432	1.3156	0.242946	0.0207259	CG10298
FBgn0030529	-0.278211	0.243006	0.0207585	Clic
FBgn0037082	0.483059	0.243422	0.0208215	CG5664
FBgn0030478	-0.327004	0.245086	0.0209982	CG1640
FBgn0022343	-0.323571	0.245086	0.0210192	CG3760
FBgn0028554	0.469179	0.245087	0.0210532	x16
FBgn0038475	0.511674	0.245087	0.0210747	Keap1
FBgn0263598	-0.271781	0.245377	0.0211274	Vha68-2
FBgn0052407	0.444743	0.247036	0.0213271	CG32407
FBgn0036502	0.443974	0.247036	0.0213404	CG7841
FBgn0038592	2.194	0.247036	0.0213631	CG18599
FBgn0029667	2.02719	0.247036	0.0213818	Gas8
FBgn0026148	0.5286	0.24729	0.0214318	CG12253
FBgn0038720	0.74858	0.247726	0.0214976	CG6231
FBgn0034215	-0.36966	0.248107	0.0215671	Mtap
FBgn0266346	0.818518	0.248107	0.0216198	CngB
FBgn0024288	0.387844	0.248107	0.0216233	Sox100B
FBgn0263602	0.359237	0.248107	0.021643	Taspase1
FBgn0031515	0.72136	0.248107	0.0216896	CG9664
FBgn0033741	-0.508841	0.248107	0.0216988	CG8545
FBgn0027610	-0.370806	0.248596	0.0217889	Dic1
FBgn0034051	-0.33584	0.248596	0.0218075	Mlf
FBgn0026374	0.613355	0.248596	0.0218259	Rhp
FBgn0263256	0.918107	0.24864	0.0218578	CG43394
FBgn0040299	0.358084	0.248846	0.0219041	Myo28B1
FBgn0083940	0.66379	0.249847	0.0220721	RhoU
FBgn0029596	0.645418	0.249847	0.0220799	CG14054
FBgn0017545	-0.509031	0.249847	0.0220814	RpS3A
FBgn0266929	1.26418	0.249847	0.0221051	CR45380
FBgn0016120	-0.361472	0.249968	0.0221441	ATPsyn-d
FBgn0030086	-0.31279	0.250123	0.022198	CG7033
FBgn0264602	-1.14115	0.250123	0.0222171	CR43951
FBgn0036765	2.59066	0.250123	0.0222468	CG7408
FBgn0039407	-0.688881	0.250123	0.0222923	CG14544
FBgn0036187	-0.367046	0.250123	0.0222991	RIOK1
FBgn0013765	0.420464	0.250647	0.0223808	cnn
FBgn0032138	-0.438363	0.250647	0.0224397	CG4364
FBgn0030293	0.393415	0.250647	0.0224515	CG1737
FBgn0039909	-0.324002	0.250647	0.0224591	CG1970
FBgn0030834	-0.350224	0.251819	0.0225934	CG8675
FBgn0086408	0.65332	0.251819	0.0226211	stl
FBgn0037549	-0.253972	0.252079	0.0227345	CG7878
FBgn0033379	-0.270844	0.252079	0.0227445	Mys45A
FBgn0028738	0.788189	0.252079	0.02275	ETH
FBgn0030747	-0.311316	0.252079	0.0227584	CG4301
FBgn0034282	-0.243226	0.252714	0.0228442	Mapmodulin
FBgn0260768	0.901061	0.253218	0.0229184	CG42566
FBgn0064766	-0.255551	0.253297	0.0229542	CG7600
FBgn0004396	0.291638	0.254821	0.023141	CrebA
FBgn0035644	-0.852488	0.254821	0.0231594	DNApol-epsilon58
FBgn0266521	1.86378	0.254821	0.0231786	stai
FBgn0029526	0.573322	0.255177	0.0232399	CR18166
FBgn0001970	0.54707	0.255358	0.0232852	Pgant35A
FBgn0000083	-0.277007	0.25561	0.0233806	AnxB9
FBgn0021776	0.392149	0.25561	0.0233879	mira
FBgn0014861	-0.488777	0.25561	0.0233984	Mcm2
FBgn0039071	2.31329	0.25561	0.0234237	CG4434
FBgn0261975	-0.533548	0.256351	0.0235206	CG42806
FBgn0038745	-0.315313	0.256401	0.023579	CG4538
FBgn0028688	-0.29802	0.256401	0.0235831	Rpn7
FBgn0013325	-0.512417	0.256416	0.0236135	RpL11
FBgn0027932	-0.372816	0.257107	0.0237061	Akap200
FBgn0039977	0.306462	0.258013	0.0238328	CG17454
FBgn0038306	-0.61978	0.258013	0.0238978	Art3
FBgn0052485	-0.410568	0.258013	0.0239057	CG32485
FBgn0028473	-0.422275	0.258013	0.0239063	Non1
FBgn0037332	0.424335	0.259297	0.0240545	Hcs
FBgn0014141	-0.636116	0.259834	0.0241338	cher
FBgn0052626	-0.307156	0.260306	0.0242069	AMPdeam
FBgn0002791	0.362105	0.260877	0.0243038	mr
FBgn0262518	-0.267024	0.260877	0.024319	Rab8
FBgn0030067	-0.495984	0.262427	0.0244932	Rbm13
FBgn0003731	-0.357738	0.262464	0.0245263	Egfr
FBgn0033112	1.2852	0.263643	0.0246769	Spn42Db
FBgn0034814	0.325738	0.263643	0.0246962	CG9890
FBgn0037293	0.388205	0.263643	0.0247258	CG12007
FBgn0011224	0.369083	0.2637	0.0247716	heph
FBgn0000064	-0.270416	0.2637	0.0248033	Ald
FBgn0034636	1.54642	0.2637	0.0248205	CG10440
FBgn0028697	-0.55852	0.26377	0.024932	RpL15
FBgn0032513	-0.570102	0.26377	0.0250651	CG6565
FBgn0029755	-0.401775	0.26377	0.0250707	Sas10
FBgn0250837	-0.38753	0.26377	0.0251133	dUTPase
FBgn0020386	0.415239	0.26377	0.0251529	Pdk1
FBgn0000241	0.541382	0.26377	0.0252104	bw
FBgn0037822	-0.346393	0.26377	0.0252575	CG14683
FBgn0033983	1.23392	0.26377	0.0252625	CG10253
FBgn0259163	-0.69978	0.26377	0.0252625	CG42268
FBgn0267773	-0.293581	0.26377	0.02529	CR46104
FBgn0085434	-0.323692	0.26377	0.0253187	NaCP60E
FBgn0010109	1.18641	0.26377	0.0253352	dpn
FBgn0263048	0.503508	0.26377	0.0253392	CG43343
FBgn0030847	0.593765	0.26377	0.0253462	CG12991
FBgn0036623	-0.290149	0.26377	0.0253765	CG4729
FBgn0020224	-0.326664	0.26377	0.0254454	Cbl
FBgn0266582	-0.307341	0.26377	0.0254456	NDUFS3
FBgn0010412	-0.553651	0.26377	0.0254718	RpS19a
FBgn0027602	-0.517915	0.26377	0.0255012	CG8611
FBgn0263239	0.811246	0.26377	0.0255015	dar1
FBgn0264273	0.473948	0.26377	0.0255159	Sema-2b
FBgn0052251	-0.625594	0.26377	0.0255277	Claspin
FBgn0031760	0.382289	0.26377	0.0255289	Tsp26A
FBgn0051373	-0.557178	0.26377	0.025564	CG31373
FBgn0038316	0.314704	0.26377	0.0256116	CG6276
FBgn0029821	1.41625	0.26377	0.0256435	CG4020
FBgn0036931	1.38118	0.26377	0.0256474	CG14183
FBgn0036493	1.49606	0.26377	0.0256616	CG7255
FBgn0000451	0.730689	0.263883	0.0257025	ect
FBgn0003423	1.35316	0.264181	0.0257719	slgA
FBgn0051997	1.51545	0.264181	0.0257913	CG31997
FBgn0027093	-0.269986	0.264254	0.0258337	Aats-arg
FBgn0267041	0.928971	0.264254	0.0258725	CR45485
FBgn0038401	0.375144	0.264254	0.025888	CG5916
FBgn0037696	-0.603592	0.264553	0.0259472	GstZ1
FBgn0038014	1.36567	0.264949	0.0260159	CG10041
FBgn0052053	0.60446	0.264976	0.0260606	CG32053
FBgn0266129	2.50651	0.264976	0.0260785	lov
FBgn0030332	-0.657183	0.265218	0.0261513	CG9360
FBgn0034053	-2.88224	0.265218	0.0261621	Cyp4aa1
FBgn0039250	-0.444653	0.265284	0.0261987	Mink
FBgn0261648	1.92018	0.265436	0.0262437	salm
FBgn0031356	-0.293349	0.265752	0.0263159	CG17660
FBgn0052813	0.412412	0.265752	0.0263349	CG32813
FBgn0065099	0.911059	0.266206	0.0264101	snRNA:7SK
FBgn0037687	-0.609887	0.266441	0.0264698	CG8132
FBgn0041707	1.34563	0.266441	0.0264935	7B2
FBgn0037679	0.2822	0.266746	0.0265756	CG8866
FBgn0004049	0.365097	0.266746	0.0265842	yrt
FBgn0037716	-0.47239	0.266928	0.0266516	CG8273
FBgn0002733	0.361299	0.266928	0.0266805	E(spl)mbeta-HLH
FBgn0035630	-0.251926	0.266928	0.0266928	CG10576
FBgn0025832	-0.556001	0.267181	0.0267483	Fen1
FBgn0019661	1.28567	0.267276	0.026788	roX1
FBgn0032222	-0.382271	0.269848	0.0270763	CG5037
FBgn0037185	0.576077	0.269961	0.0271205	CG11367
FBgn0050410	-0.326614	0.269961	0.0271739	Rpi
FBgn0033615	-0.414386	0.269961	0.0271791	CG7741
FBgn0260441	-0.579464	0.270197	0.0272334	RpS12
FBgn0250814	-0.266524	0.271155	0.0273606	CG4169
FBgn0033921	-2.25908	0.271486	0.0274703	tej
FBgn0053267	1.83424	0.271486	0.0274728	CG33267
FBgn0034312	0.392558	0.271486	0.0275112	CG10916
FBgn0038662	-0.378809	0.271486	0.0275168	Mpc1
FBgn0266409	0.370569	0.272499	0.0276913	CG45049
FBgn0032451	0.377809	0.272499	0.0277066	spict
FBgn0261999	1.48873	0.272499	0.0277117	CG42817
FBgn0030613	2.12694	0.272575	0.0277513	Rab3-GEF
FBgn0050159	-0.296999	0.272575	0.0277841	CG30159
FBgn0259927	1.02612	0.272575	0.0278337	CG42450
FBgn0037305	-0.582582	0.272575	0.0278695	CG12173
FBgn0010406	-0.363878	0.272575	0.0278735	RNaseX25
FBgn0031974	-0.489464	0.272662	0.0279132	CG12560
FBgn0031268	-0.609574	0.272722	0.0279501	cold
FBgn0032166	-0.529038	0.272792	0.0279881	CG4619
FBgn0003093	0.516156	0.2731	0.0280973	Pkc98E
FBgn0002031	-0.332331	0.2731	0.0281008	l(2)37Cc
FBgn0031711	-0.348347	0.2731	0.0281123	CG6907
FBgn0038846	2.58687	0.273586	0.0282056	CG5697
FBgn0263231	-0.33022	0.273586	0.0282242	bel
FBgn0263235	1.31127	0.274169	0.0283625	Phae2
FBgn0033644	0.6982	0.274169	0.0284198	Tret1-2
FBgn0024698	0.343699	0.274169	0.0284349	Cpsf160
FBgn0000416	-0.275375	0.274169	0.0284851	Sap-r
FBgn0264464	0.302398	0.274169	0.0284917	CR43872
FBgn0033055	0.386764	0.274169	0.0284944	Tbce
FBgn0026313	0.378864	0.274169	0.0285226	X11L
FBgn0261046	0.872316	0.274169	0.0285322	Dscam3
FBgn0261439	-0.243637	0.274279	0.0285977	SdhA
FBgn0030877	0.299766	0.274279	0.0286247	Arp8
FBgn0038984	-0.232963	0.274279	0.0286487	AdipoR
FBgn0032051	-0.32301	0.274279	0.0286676	CG13097
FBgn0031320	-0.561087	0.275131	0.0287955	CG5126
FBgn0031904	-0.411057	0.275131	0.0288188	CG5149
FBgn0027654	2.10775	0.276063	0.0289477	jdp
FBgn0013972	2.8779	0.276318	0.0290056	Gycalpha99B
FBgn0014869	-0.249243	0.276338	0.0290389	Pglym78
FBgn0032938	0.340536	0.276363	0.0290728	CG8671
FBgn0030077	-1.10852	0.277482	0.0292338	CG15365
FBgn0003074	-0.254873	0.277482	0.0292595	Pgi
FBgn0037021	0.3723	0.277482	0.0292845	CG11399
FBgn0033656	0.305486	0.277491	0.0293168	S2P
FBgn0013269	-0.37124	0.27801	0.029403	FK506-bp1
FBgn0263351	-0.265617	0.278022	0.0294358	AP-2mu
FBgn0000504	0.68992	0.278124	0.0294781	dsx
FBgn0052056	-0.295476	0.278612	0.0295612	scramb1
FBgn0261618	-0.599223	0.278677	0.0296072	larp
FBgn0015781	-0.401253	0.278677	0.0296649	P5cr
FBgn0036671	0.280587	0.278677	0.0296942	CG9951
FBgn0064225	-0.575464	0.278677	0.0296944	RpL5
FBgn0039623	0.369194	0.278677	0.0297255	CG1951
FBgn0037562	0.848289	0.278921	0.0297831	CG11671
FBgn0039544	0.535561	0.279306	0.0298558	CG12877
FBgn0032845	-0.36049	0.279788	0.0299388	CG10747
FBgn0032974	0.298656	0.280307	0.0300261	CG3651
FBgn0021768	-0.354123	0.28049	0.0300774	nudC
FBgn0266084	0.389433	0.280943	0.0302141	Fhos
FBgn0027780	0.392878	0.280943	0.0302141	U26
FBgn0038746	-0.292196	0.280943	0.0302623	Surf6
FBgn0001341	-0.458292	0.280943	0.0302731	l(1)1Bi
FBgn0034405	-0.295949	0.280943	0.0302847	Jheh2
FBgn0041184	-0.2794	0.281368	0.0303623	Socs36E
FBgn0031457	0.326764	0.28227	0.0304995	CG3077
FBgn0033761	-0.364485	0.28227	0.0305235	CG8778
FBgn0035203	-0.346724	0.283283	0.0306795	CG9149
FBgn0037714	1.48385	0.283283	0.0307266	CG9396
FBgn0260722	0.39827	0.283283	0.030729	CR42549
FBgn0030968	-0.639645	0.284674	0.0309121	CG7322
FBgn0033699	-0.497101	0.285154	0.0310134	RpS11
FBgn0036689	-2.82511	0.285154	0.0310418	CG7730
FBgn0032298	-0.320725	0.285154	0.0310608	CG6724
FBgn0028647	0.423964	0.285553	0.0311421	CG11902
FBgn0034496	-0.337005	0.285553	0.0312	CG9143
FBgn0052264	-0.44185	0.285553	0.0312016	CG32264
FBgn0035868	0.900752	0.285553	0.0312333	CG7194
FBgn0019662	0.350625	0.285753	0.0312876	qm
FBgn0038206	0.385802	0.286058	0.0313765	twf
FBgn0036762	-0.282522	0.286058	0.0313856	CG7430
FBgn0265873	1.21156	0.286559	0.0314729	CR44662
FBgn0013469	0.400501	0.286597	0.0315431	klu
FBgn0031070	-0.555719	0.286597	0.0315638	CG12702
FBgn0039187	0.364047	0.286597	0.0315742	CG6454
FBgn0004868	-0.239835	0.287205	0.0316736	Gdi
FBgn0030121	0.271222	0.287375	0.0317249	Cfp1
FBgn0052418	-0.457946	0.28741	0.0318096	vito
FBgn0032124	-0.383023	0.28741	0.0318314	CG17855
FBgn0027547	-0.261003	0.28741	0.0318433	CG1927
FBgn0010408	-0.557652	0.28741	0.0318587	RpS9
FBgn0039941	0.8634	0.287537	0.0319052	CG17167
FBgn0062442	-0.336528	0.288213	0.0320373	Cisd2
FBgn0015282	-0.281568	0.288213	0.0320454	Rpt2
FBgn0038473	-0.277542	0.288808	0.0321441	Ns1
FBgn0036007	0.313024	0.290034	0.0323409	path
FBgn0051674	0.494091	0.290034	0.0323636	CG31674
FBgn0003884	-0.381524	0.290034	0.0323789	alphaTub84B
FBgn0003139	0.231547	0.29012	0.0324213	PpV
FBgn0085409	-0.65989	0.290684	0.0325172	CG34380
FBgn0031209	-1.83771	0.290892	0.0325982	Ir21a
FBgn0033754	-0.651441	0.290892	0.0326275	Ak6
FBgn0037744	-0.391806	0.290892	0.0326391	CG8417
FBgn0034650	0.306428	0.292309	0.0328456	NC2alpha
FBgn0037913	-0.39088	0.292309	0.0328641	fabp
FBgn0028427	-0.250536	0.293745	0.0330788	Ilk
FBgn0016691	-0.366188	0.293745	0.0331039	Oscp
FBgn0038128	0.418916	0.293745	0.0331252	Ravus
FBgn0033196	0.910197	0.29375	0.0331588	CG1358
FBgn0032157	0.249547	0.294092	0.0332308	Etl1
FBgn0033876	1.23761	0.295692	0.0334449	Syngr
FBgn0267425	-0.362687	0.296376	0.0335599	CR45778
FBgn0040233	-0.484674	0.296376	0.0335892	cana
FBgn0020376	1.33676	0.296975	0.0337198	Sr-CIII
FBgn0019624	-0.355241	0.296975	0.0337242	CoVa
FBgn0033989	-0.316178	0.297173	0.0337803	CG7639
FBgn0030718	-0.335514	0.298701	0.0339877	CG9172
FBgn0039354	0.868035	0.298705	0.034022	Lgr3
FBgn0025682	0.438284	0.299143	0.0341624	scf
FBgn0039696	-0.890736	0.299143	0.0341972	CG7837
FBgn0038325	0.342338	0.299143	0.034237	Atg4b
FBgn0004367	0.683396	0.299143	0.034254	mei-41
FBgn0032620	-0.658252	0.299143	0.0342545	CG12288
FBgn0036053	-0.420873	0.299143	0.0342773	iPLA2-VIA
FBgn0000150	-0.368643	0.299143	0.0343085	awd
FBgn0011272	-0.498209	0.29917	0.0343454	RpL13
FBgn0034487	1.39074	0.299492	0.0344274	Efhc1.2
FBgn0050356	1.11636	0.299492	0.034508	CG30356
FBgn0039883	1.44626	0.299492	0.0345232	RhoGAP100F
FBgn0032474	0.371411	0.299492	0.0345542	DnaJ-H
FBgn0266199	0.78907	0.299492	0.0345648	CR44894
FBgn0051301	-0.255665	0.299492	0.0345854	CG31301
FBgn0034225	0.970141	0.299535	0.0346242	veil
FBgn0032449	1.00065	0.302327	0.0350179	CG17036
FBgn0052170	0.26316	0.302327	0.0350597	CG32170
FBgn0039450	-0.25129	0.302327	0.035095	CG5484
FBgn0032120	-0.536894	0.302327	0.0351081	CG33298
FBgn0052365	0.954863	0.302327	0.0351625	CG32365
FBgn0050486	1.09157	0.302327	0.0351989	CG30486
FBgn0034459	-2.22846	0.302327	0.0352124	CG16716
FBgn0026616	1.81289	0.302327	0.0352576	alpha-Man-IIb
FBgn0250874	-0.281235	0.302327	0.0353335	ttm50
FBgn0003274	-0.568825	0.302327	0.0353593	RpLP2
FBgn0039532	0.346453	0.302327	0.0353641	Mtl
FBgn0040323	0.333407	0.302327	0.0354297	GNBP1
FBgn0033631	0.718949	0.302327	0.0355108	Sod3
FBgn0265296	1.60161	0.302327	0.0355339	Dscam2
FBgn0037071	0.389471	0.302327	0.03561	CG7632
FBgn0037016	-0.227784	0.302327	0.0356202	CG13252
FBgn0036135	-0.322236	0.302327	0.0356691	mRpL2
FBgn0025642	2.23962	0.302327	0.035723	CG32812
FBgn0027601	0.600704	0.302327	0.0357238	pdgy
FBgn0037109	0.2358	0.302327	0.0357617	MED1
FBgn0038063	-0.668389	0.302327	0.0357758	Octbeta2R
FBgn0035975	0.322529	0.302327	0.0358502	PGRP-LA
FBgn0051955	0.522586	0.302327	0.035852	CG31955
FBgn0027582	0.32564	0.302327	0.0359035	CG6230
FBgn0036547	1.93643	0.302327	0.0359048	CG17032
FBgn0260779	-0.549407	0.302327	0.0359252	gatA
FBgn0011768	-0.360927	0.302327	0.0359815	Fdh
FBgn0053113	-0.302161	0.302327	0.0359906	Rtnl1
FBgn0029525	0.354013	0.302327	0.0360227	CG18273
FBgn0034013	-1.35342	0.302327	0.0360244	unc-5
FBgn0030852	1.83801	0.302327	0.0360266	CG8316
FBgn0264978	-0.414423	0.302327	0.0360401	Slh
FBgn0041161	0.360946	0.302681	0.0361282	blue
FBgn0010380	-0.246372	0.302681	0.0361507	AP-1-2beta
FBgn0031143	0.399414	0.302793	0.0361983	CG1532
FBgn0035538	2.18636	0.304416	0.0364267	DopEcR
FBgn0032665	-0.796843	0.305072	0.0365573	CG15152
FBgn0261592	-0.529546	0.305072	0.0365741	RpS6
FBgn0035600	-0.280232	0.305391	0.0366476	CG4769
FBgn0033447	1.98484	0.305391	0.0367007	dila
FBgn0051451	2.0701	0.305391	0.0367513	CR31451
FBgn0029939	0.506625	0.305391	0.0368368	CG9650
FBgn0011589	2.41942	0.305391	0.0368371	Elk
FBgn0023096	0.999993	0.305391	0.036862	btv
FBgn0022153	0.336991	0.305391	0.0368716	l(2)k05819
FBgn0039094	-0.412063	0.305391	0.036921	CG10184
FBgn0038074	2.31976	0.305391	0.0369365	Gnmt
FBgn0003091	1.43637	0.305391	0.0369575	Pkc53E
FBgn0034914	-0.229083	0.305551	0.0370114	CG5554
FBgn0034045	-2.29269	0.305815	0.0370779	CG8249
FBgn0033984	0.372934	0.306344	0.0371766	Lap1
FBgn0263986	1.68707	0.306956	0.0372857	cd
FBgn0050049	0.567152	0.306997	0.037344	CG30049
FBgn0034223	0.278244	0.306997	0.03736	Tes
FBgn0086450	-0.802725	0.307837	0.037497	su(r)
FBgn0015024	-0.225183	0.308536	0.037617	CkIalpha
FBgn0033755	0.284425	0.308661	0.0376671	ClC-b
FBgn0030403	0.262165	0.308689	0.0377054	CG1824
FBgn0037431	1.2548	0.309617	0.0378751	CG17917
FBgn0266196	-0.444442	0.309617	0.0379119	CR44891
FBgn0019925	-0.2658	0.309617	0.0379237	Surf4
FBgn0033087	0.31492	0.309802	0.0379814	Hsepi
FBgn0003896	2.4536	0.30998	0.0380383	tup
FBgn0051102	0.921673	0.3108	0.038174	CG31102
FBgn0000075	2.16945	0.312145	0.0383744	amd
FBgn0030306	-0.302814	0.312706	0.0384999	Spase25
FBgn0039294	0.896158	0.312706	0.0385524	Cad96Cb
FBgn0000256	-0.673719	0.312706	0.0386044	capu
FBgn0005677	2.01993	0.312706	0.0386252	dac
FBgn0034816	0.728317	0.312706	0.0386523	CG3085
FBgn0000100	-0.42155	0.312706	0.0386554	RpLP0
FBgn0000286	0.485593	0.313291	0.0387917	Cf2
FBgn0037537	-0.428608	0.313291	0.0387985	CG2767
FBgn0086348	0.836941	0.313386	0.0388457	se
FBgn0040066	-0.335732	0.313839	0.0389373	wds
FBgn0001091	-0.287301	0.314614	0.039069	Gapdh1
FBgn0003450	1.09313	0.314688	0.0391197	snk
FBgn0027570	1.93659	0.314688	0.0391494	Nep2
FBgn0011570	-0.317243	0.31595	0.0393875	cpb
FBgn0027329	-0.2468	0.31595	0.0393881	Tcp-1zeta
FBgn0036806	2.16233	0.31595	0.0394134	Cyp12c1
FBgn0011204	-0.614302	0.315965	0.039451	cue
FBgn0030876	0.341436	0.316379	0.0395576	CG6762
FBgn0022942	-0.264947	0.316379	0.0395741	Cbp80
FBgn0030629	0.878892	0.316671	0.0396639	CG9123
FBgn0034723	-0.516076	0.316671	0.0396822	CG13506
FBgn0024733	-0.438458	0.318531	0.0399514	RpL10
FBgn0261270	-0.363581	0.319781	0.0401443	SelD
FBgn0016041	-0.240183	0.320609	0.040317	Tom40
FBgn0003654	-0.300557	0.320609	0.0403215	sw
FBgn0038772	0.607872	0.320609	0.0403569	mdlc
FBgn0036288	-0.30378	0.321238	0.0405426	CG10660
FBgn0032733	1.13113	0.321238	0.0405428	CG15170
FBgn0035812	0.252437	0.321238	0.0405449	CG7457
FBgn0020304	0.344438	0.322153	0.0406969	drongo
FBgn0262007	2.2147	0.322472	0.0407736	CG42825
FBgn0265810	0.717716	0.322775	0.0408927	CR44599
FBgn0086447	-0.492477	0.322775	0.0409471	l(2)37Cg
FBgn0040383	-0.296586	0.322775	0.040954	CG5254
FBgn0035028	0.31356	0.322775	0.0409578	Start1
FBgn0028504	0.407608	0.322996	0.0410224	CG12182
FBgn0038814	0.382703	0.323119	0.0410881	CG15923
FBgn0033720	2.61713	0.323119	0.0411109	CG13160
FBgn0261429	1.11457	0.323517	0.0412085	CR42646
FBgn0033183	0.227369	0.323517	0.0413109	CG1620
FBgn0264446	1.04733	0.323517	0.0413171	CR43864
FBgn0266312	0.54333	0.323517	0.0413419	CR44977
FBgn0035111	0.261064	0.323517	0.0413444	CG16940
FBgn0038035	0.259047	0.324503	0.0415238	lig3
FBgn0040660	-0.34045	0.324503	0.0415686	CG13551
FBgn0023531	0.659897	0.324503	0.0415994	CG32809
FBgn0015229	0.43024	0.324503	0.041617	glec
FBgn0034387	-0.417961	0.325469	0.0417897	Cyp12b2
FBgn0050466	-0.273898	0.325469	0.0418381	CG30466
FBgn0014427	-1.13296	0.325469	0.0418513	CG11899
FBgn0041604	-0.601789	0.325789	0.0419292	dlp
FBgn0031912	-0.268056	0.325951	0.041987	CG5261
FBgn0264572	0.279074	0.326278	0.0421388	CR43944
FBgn0031275	2.31756	0.326278	0.0421389	GABA-B-R3
FBgn0002924	-0.3102	0.326278	0.0421396	ncd
FBgn0032004	1.17756	0.326342	0.0422098	CG8292
FBgn0035228	-0.267864	0.326342	0.0422217	CG12091
FBgn0051721	0.440608	0.326521	0.0422817	Trim9
FBgn0011770	-0.385225	0.327519	0.0424667	Gip
FBgn0031534	-0.318236	0.327519	0.042491	Snx1
FBgn0034258	-0.285424	0.327519	0.042522	eIF3-S8
FBgn0030506	0.466838	0.327591	0.0425894	Lig4
FBgn0020910	-0.540175	0.327591	0.0426053	RpL3
FBgn0266311	-0.341215	0.327941	0.0427198	CR44976
FBgn0039655	1.23655	0.327941	0.0427387	CG14507
FBgn0036334	-0.394833	0.327941	0.042762	CG11267
FBgn0028406	0.373459	0.328591	0.0429329	Drep-4
FBgn0053926	2.13192	0.328591	0.042943	CG33926
FBgn0051368	0.298503	0.328591	0.0429715	CG31368
FBgn0264087	1.08193	0.328591	0.0430334	Slob
FBgn0262816	-0.41863	0.328591	0.043062	CG43187
FBgn0050349	-0.380294	0.328591	0.0431115	CG30349
FBgn0004509	0.612028	0.328591	0.0431424	Fur1
FBgn0030485	1.42419	0.328591	0.0431437	CG1998
FBgn0041180	0.396006	0.328614	0.0432032	Tep4
FBgn0265540	0.430095	0.328614	0.0433035	CR44390
FBgn0003218	-0.513468	0.328614	0.0433684	rdgB
FBgn0031081	-0.445498	0.328614	0.0433807	Nep3
FBgn0020930	0.357521	0.328614	0.0435202	Dgkepsilon
FBgn0039114	-2.11152	0.328614	0.043526	Lsd-1
FBgn0003721	-0.385728	0.328614	0.0435532	Tm1
FBgn0036975	0.407154	0.328614	0.0435586	CG5618
FBgn0038058	-0.312032	0.328614	0.0435642	CG5608
FBgn0039349	-0.256168	0.328614	0.0435863	Ssadh
FBgn0013275	-0.860377	0.328614	0.0435927	Hsp70Aa
FBgn0026250	-0.25813	0.328614	0.0436473	eIF-1A
FBgn0000092	1.15296	0.328614	0.043709	CG2650
FBgn0035851	0.259592	0.328614	0.0437159	MED24
FBgn0038925	-0.322828	0.328614	0.0437606	Cchl
FBgn0026634	-0.256542	0.328614	0.0438144	ldlCp
FBgn0002607	-0.485742	0.328614	0.043852	RpL19
FBgn0262580	0.954921	0.328614	0.0438834	CG43120
FBgn0032454	-0.276062	0.328614	0.0438895	CG5787
FBgn0038080	-0.461958	0.328614	0.0439826	CG12279
FBgn0264776	0.775623	0.328614	0.0439953	CG44014
FBgn0032160	-0.292145	0.328614	0.0440084	CG4598
FBgn0002719	-0.328027	0.328614	0.0440424	Men
FBgn0028471	0.292866	0.328614	0.0440432	Nab2
FBgn0033135	1.18929	0.328614	0.0440886	Tsp42En
FBgn0262624	-0.46259	0.328614	0.0441422	Tmhs
FBgn0039734	2.09546	0.328614	0.0441803	Tace
FBgn0259878	0.490711	0.328614	0.0441865	Fs
FBgn0030081	-0.62347	0.32875	0.044245	CG7246
FBgn0053139	0.245507	0.32875	0.0444245	Ranbp11
FBgn0265531	0.546803	0.32875	0.0444647	CR44381
FBgn0051144	-0.521642	0.32875	0.0444876	CR31144
FBgn0027525	-0.311301	0.32875	0.0445176	CG7686
FBgn0052484	0.257324	0.32875	0.0445257	Sk2
FBgn0039075	1.14057	0.32875	0.0445333	CG4393
FBgn0033377	-0.225889	0.32875	0.0445827	Pmm45A
FBgn0038020	0.381592	0.32875	0.0445861	GstD9
FBgn0038202	-3.45905	0.32875	0.0446109	CG12402
FBgn0004797	-0.509576	0.32875	0.0446338	mdy
FBgn0038065	-0.230116	0.32875	0.0446835	Snx3
FBgn0035138	1.13984	0.32875	0.0446953	CG13884
FBgn0037130	0.829974	0.32875	0.0447248	Syn1
FBgn0039207	0.340009	0.328968	0.0447916	CG5789
FBgn0031650	1.77337	0.329244	0.0448665	CG14044
FBgn0260450	0.253304	0.329603	0.0449526	CalpC
FBgn0039993	-0.318221	0.330064	0.0450528	CG17691
FBgn0042174	0.388432	0.330389	0.0451345	CR18854
FBgn0262570	0.851624	0.330461	0.0451817	CG43110
FBgn0028579	0.375582	0.330958	0.045287	phtf
FBgn0026570	0.449233	0.33269	0.0455861	CG5704
FBgn0039300	-0.561233	0.33269	0.0456125	RpS27
FBgn0051174	-2.40461	0.33269	0.0456369	CG31174
FBgn0263219	0.613111	0.333775	0.0458234	Dscam4
FBgn0024234	-0.392225	0.334005	0.0459285	gbb
FBgn0034933	-0.354685	0.334005	0.0459304	CG3735
FBgn0037555	0.322125	0.334366	0.0460178	Ada2b
FBgn0086355	-0.253149	0.335177	0.0462114	Tpi
FBgn0000181	-0.328335	0.335177	0.0462404	bic
FBgn0031896	0.281185	0.335177	0.0462675	CG4502
FBgn0040398	0.286746	0.335177	0.046281	CG14629
FBgn0041160	-1.14403	0.335976	0.0464293	comm2
FBgn0266429	1.03584	0.336007	0.0464715	AstA-R1
FBgn0038922	-0.255244	0.336134	0.0465773	CG6439
FBgn0004839	0.301562	0.336134	0.046589	otk
FBgn0265044	1.13583	0.336134	0.046621	CR44161
FBgn0032916	0.404167	0.336134	0.046641	CG9257
FBgn0036640	0.415246	0.337057	0.0468194	nxf2
FBgn0033713	0.257592	0.337057	0.0468542	CG8841
FBgn0086446	-0.466363	0.337057	0.0469417	l(2)37Ce
FBgn0030774	1.48482	0.337057	0.046979	spheroide
FBgn0019886	-0.336601	0.337057	0.0470268	Letm1
FBgn0028381	0.328242	0.337057	0.047029	Decay
FBgn0003483	0.738848	0.337057	0.0470356	spn-E
FBgn0027080	-0.361137	0.338516	0.0472775	Aats-tyr
FBgn0260747	-0.295177	0.338649	0.0474088	CG5010
FBgn0004403	-0.612548	0.338649	0.0474236	RpS14a
FBgn0033608	-0.428872	0.338649	0.0474455	CG13220
FBgn0038871	-0.269389	0.338649	0.0475228	CG3337
FBgn0039731	-0.977388	0.338649	0.0475692	Sas-6
FBgn0026315	0.409928	0.338649	0.0475981	Ugt35a
FBgn0039215	0.260901	0.338649	0.047608	CG6695
FBgn0004865	-0.784658	0.338649	0.0476489	Eip78C
FBgn0004370	0.506662	0.338649	0.0476494	Ptp10D
FBgn0086711	-2.28988	0.338649	0.0476787	mol
FBgn0033491	0.403744	0.338742	0.04773	CG18011
FBgn0036191	0.36163	0.339002	0.0478624	Sug
FBgn0041723	1.00848	0.339002	0.0479104	rho-5
FBgn0267534	-0.516586	0.339002	0.0479232	CR45874
FBgn0023523	1.37099	0.339002	0.0479384	Or2a
FBgn0263780	-1.31988	0.339002	0.0479583	CG17684
FBgn0085419	2.12852	0.339505	0.0480677	Rgk2
FBgn0038446	0.521063	0.34059	0.0482599	CG14903
FBgn0030151	-0.355251	0.342101	0.0485127	CG1354
FBgn0035439	0.780594	0.3424	0.0485938	CG14961
FBgn0035471	-0.281875	0.342863	0.0486982	Sc2
FBgn0034968	-0.54666	0.342985	0.0487947	RpL12
FBgn0051354	-2.58952	0.342985	0.048797	Hsp70Bbb
FBgn0030241	-0.491576	0.342985	0.0488317	feo
FBgn0011763	-0.232188	0.343404	0.0489302	Dp
FBgn0031897	0.333767	0.343544	0.048989	CG13784
FBgn0038951	0.272815	0.34361	0.0490372	CG5380
FBgn0040395	0.27891	0.344279	0.0491715	Unc-76
FBgn0023542	-0.278809	0.344618	0.049259	Nmd3
FBgn0029137	1.80649	0.34535	0.0494026	Patsas
FBgn0264507	0.667209	0.345598	0.0494771	CR43906
FBgn0037906	0.446493	0.345885	0.0495574	PGRP-LB
FBgn0034877	-0.444543	0.345907	0.0495996	levy
FBgn0036910	0.323628	0.346914	0.0498179	Cyp305a1
FBgn0037850	1.11538	0.346914	0.0498224	CG14695
FBgn0020766	-0.43168	0.34728	0.0499141	Aats-phe
FBgn0001989	-0.35231	0.347304	0.0500002	l(2)35Di
FBgn0035085	-0.329873	0.347304	0.0500003	CG3770
FBgn0011284	-0.493349	0.347304	0.0500354	RpS4
FBgn0036738	-2.6329	0.347797	0.0501457	CG7542
FBgn0032871	-0.577194	0.349417	0.0504428	CG2611
FBgn0040010	-0.319047	0.349417	0.0504968	CG17493
FBgn0067102	0.265293	0.349417	0.0505424	GlcT-1
FBgn0026433	0.326113	0.349417	0.0505724	Grip128
FBgn0000810	0.313195	0.349417	0.0505766	fs(1)K10
FBgn0039735	-0.320902	0.35026	0.0507382	CG7911
FBgn0030994	0.767478	0.350621	0.0508357	HP1D3csd
FBgn0031776	-0.448264	0.350621	0.0508697	CG13993
FBgn0050046	2.49618	0.35098	0.0509669	CG30046
FBgn0039868	-0.385159	0.35098	0.0510011	CG11563
FBgn0266328	1.01226	0.351418	0.0511046	CR44993
FBgn0014870	-0.333571	0.351907	0.0512153	Psi
FBgn0264704	0.840464	0.354348	0.0516423	CR43973
FBgn0005672	0.241015	0.354348	0.0516507	spi
FBgn0029148	-0.409436	0.354572	0.0517235	NHP2
FBgn0032486	0.472715	0.354962	0.0518321	CG5705
FBgn0034269	0.344378	0.354962	0.0518605	CG6406
FBgn0046685	0.287409	0.357103	0.0522137	Wsck
FBgn0038679	-0.347555	0.357767	0.0523512	CG6040
FBgn0263930	0.359311	0.358003	0.0524262	dally
FBgn0024804	-0.245211	0.358231	0.0525	Dbp80
FBgn0266452	-0.272967	0.3583	0.0525754	CTPsyn
FBgn0031307	0.650978	0.3583	0.0526344	MFS3
FBgn0032689	0.266507	0.3583	0.052693	CG10413
FBgn0266570	-0.414727	0.3583	0.0527028	CG2982
FBgn0266916	-0.544515	0.3583	0.0527126	Cenp-C
FBgn0038391	0.200533	0.358316	0.0527848	GATAe
FBgn0051296	1.11987	0.358316	0.052796	CG31296
FBgn0267160	0.696401	0.358894	0.0529217	CR45600
FBgn0034878	0.305388	0.359096	0.052992	pita
FBgn0010282	-0.322017	0.359562	0.0531015	TfIIFalpha
FBgn0039140	0.282231	0.359656	0.0531865	Miro
FBgn0038038	-0.299111	0.359656	0.0533638	CG5167
FBgn0010501	-0.567466	0.359656	0.0534716	Dcp-1
FBgn0062928	-0.415899	0.359656	0.0535056	pncr009:3L
FBgn0050009	-0.981414	0.359656	0.0535083	CR30009
FBgn0053526	0.395911	0.359656	0.0535166	PNUTS
FBgn0037370	-0.368298	0.359656	0.0535249	CG1236
FBgn0039266	-0.285339	0.359656	0.0535333	CG11791
FBgn0031050	-0.294283	0.359656	0.0535817	Arp10
FBgn0014269	0.299951	0.359656	0.0536247	prod
FBgn0038490	0.613251	0.359656	0.0536262	CG5285
FBgn0261597	-0.547555	0.359656	0.0536418	RpS26
FBgn0038760	-0.286181	0.359656	0.0536733	MED25
FBgn0036196	-0.297783	0.359656	0.0536843	CG11658
FBgn0016693	-0.241665	0.359941	0.053792	Past1
FBgn0000667	0.242197	0.359941	0.0538081	Actn
FBgn0027341	0.603966	0.360915	0.0539946	Gfat1
FBgn0033912	-0.512233	0.361077	0.0541295	RpS23
FBgn0023097	0.331105	0.361077	0.0541385	bon
FBgn0030582	0.31287	0.361077	0.0541412	CG14411
FBgn0031771	-0.256553	0.361318	0.0542963	CG9140
FBgn0037137	-0.249464	0.361318	0.0543242	Nopp140
FBgn0033233	0.39142	0.361318	0.0543524	Kdm4A
FBgn0259148	-2.66184	0.361318	0.0543545	CG42263
FBgn0021944	-0.285343	0.361318	0.0544624	Coprox
FBgn0037583	0.277386	0.361318	0.0545259	CG9684
FBgn0032032	0.689296	0.361318	0.0545497	CG17294
FBgn0259979	-0.290947	0.361318	0.0546358	CG17337
FBgn0021906	-0.295845	0.361318	0.0547324	RFeSP
FBgn0036761	0.359056	0.361318	0.0547377	MED19
FBgn0264706	1.11213	0.361318	0.0548111	CR43975
FBgn0033162	-0.319344	0.361318	0.0548456	CG1707
FBgn0032720	-0.315252	0.361318	0.0548616	mRpL13
FBgn0031684	-0.348779	0.361318	0.0548698	CG8680
FBgn0052441	-0.306525	0.361318	0.0548949	CG32441
FBgn0038738	-0.346127	0.361318	0.054906	CG4572
FBgn0002542	-0.316419	0.361318	0.054961	lds
FBgn0040823	2.00808	0.361318	0.054966	dpr6
FBgn0263039	-0.431853	0.361318	0.0550036	CR43334
FBgn0032430	-0.314039	0.361318	0.0550112	CG6388
FBgn0000404	-0.253198	0.361318	0.0550347	CycA
FBgn0004926	0.208416	0.361376	0.0550843	eIF-2beta
FBgn0034614	-0.712507	0.361571	0.0551549	CG9752
FBgn0021825	-0.250629	0.362729	0.0553725	Dmn
FBgn0267451	0.314977	0.362926	0.0554436	CR45801
FBgn0015929	-0.301209	0.363109	0.0555614	dpa
FBgn0262366	1.03981	0.363109	0.0555843	CG43064
FBgn0027509	0.21662	0.363109	0.0556245	CG7261
FBgn0033302	0.538406	0.363109	0.0556535	Cyp6a14
FBgn0029831	1.73219	0.363109	0.0557972	CG5966
FBgn0250906	-0.201652	0.363109	0.0558093	Pgk
FBgn0013750	-0.250402	0.363109	0.0558817	Arf51F
FBgn0033438	1.54868	0.363109	0.0559347	Mmp2
FBgn0260972	-0.299605	0.363109	0.0559672	alc
FBgn0010315	0.275405	0.363109	0.0559772	CycD
FBgn0031631	-1.50454	0.363109	0.0559989	CG3225
FBgn0031832	-0.28078	0.363109	0.0560518	CG9596
FBgn0037044	0.264525	0.363109	0.0560585	CG10585
FBgn0259707	0.693933	0.363109	0.0560767	CG42361
FBgn0025382	1.63555	0.363109	0.0561234	Rab27
FBgn0039430	-0.532409	0.363109	0.056128	CG5455
FBgn0030956	0.423889	0.363676	0.0562567	CG18259
FBgn0030240	0.295752	0.363997	0.0564954	CG2202
FBgn0037960	0.471972	0.363997	0.0565396	mthl5
FBgn0025739	-0.621095	0.363997	0.0565438	pon
FBgn0010223	0.522367	0.363997	0.0565453	Galphaf
FBgn0031652	0.400091	0.363997	0.0565552	jet
FBgn0038869	-0.277414	0.363997	0.056579	CG3353
FBgn0034588	0.752247	0.363997	0.0566235	CG9394
FBgn0034182	0.809302	0.363997	0.0566355	CG9640
FBgn0050359	0.846168	0.364025	0.0566809	Mal-A5
FBgn0033550	-0.421568	0.364523	0.0568244	CG12341
FBgn0032343	0.463108	0.364523	0.0568408	CG6201
FBgn0063923	-0.91861	0.364526	0.0569242	Kaz1-ORFB
FBgn0032123	-0.377636	0.364526	0.0569948	Oatp30B
FBgn0082954	1.29797	0.364526	0.0570261	snoRNA:Psi28S-3571
FBgn0036691	-0.514387	0.364526	0.057047	beg
FBgn0031688	1.72732	0.364526	0.0570786	Cyp28d2
FBgn0051729	-0.227439	0.364526	0.0570885	CG31729
FBgn0011710	-0.224256	0.365158	0.0572436	2020-09-01
FBgn0032244	-1.03022	0.365158	0.057315	RfC3
FBgn0041605	1.97079	0.365158	0.0574306	cpx
FBgn0020238	-0.219544	0.365158	0.057441	14-3-3epsilon
FBgn0051233	-1.7374	0.365158	0.057477	CG31233
FBgn0027291	-0.271595	0.365158	0.0574838	l(1)G0156
FBgn0033402	0.251925	0.365158	0.0575121	Myd88
FBgn0030996	0.241542	0.365158	0.0575329	CG14194
FBgn0031971	0.418137	0.365158	0.0575864	Sirup
FBgn0039360	-0.316582	0.365158	0.0576061	CLS
FBgn0050428	-0.444401	0.365158	0.0576414	CG30428
FBgn0035523	-0.245228	0.365265	0.0576995	CG1311
FBgn0050272	3.07322	0.366896	0.0579986	CG30272
FBgn0015036	0.471361	0.36694	0.058047	Cyp4ae1
FBgn0002891	0.48525	0.367014	0.0581002	mus205
FBgn0037188	0.27997	0.367226	0.0581753	CG7369
FBgn0261529	1.94737	0.367625	0.05828	ms(2)34Fe
FBgn0025835	0.870571	0.367794	0.0583483	CG17707
FBgn0266275	0.920357	0.367809	0.0583986	CR44960
FBgn0032017	0.325787	0.367809	0.0584339	CG7810
FBgn0035829	-0.563792	0.368186	0.0585353	HP4
FBgn0033735	-0.284301	0.368958	0.0586997	CG8525
FBgn0025519	0.298735	0.368991	0.0587467	fidipidine
FBgn0030300	-0.533887	0.36959	0.0588838	Sk1
FBgn0028978	0.354171	0.37003	0.0589957	trbl
FBgn0033449	-0.693187	0.370124	0.0590526	CG1663
FBgn0051935	0.349426	0.371097	0.0592497	CG31935
FBgn0267766	-0.517476	0.371607	0.0593732	CR46097
FBgn0015288	-0.474006	0.371816	0.0594486	RpL22
FBgn0051956	1.80467	0.371859	0.0595157	pgant4
FBgn0031494	-0.580942	0.371859	0.0595395	CG17219
FBgn0021765	-0.23247	0.372264	0.0596463	scu
FBgn0086907	-2.13643	0.372307	0.0596953	Cyt-c-d
FBgn0267533	0.379336	0.37252	0.0597716	CR45873
FBgn0038414	0.926256	0.37263	0.0598313	CG6901
FBgn0031195	0.69984	0.372874	0.0600005	CG17600
FBgn0031044	-0.336053	0.372874	0.060028	MKP-4
FBgn0010516	-0.292042	0.372874	0.0600521	wal
FBgn0035825	0.267792	0.372874	0.0601088	CG8111
FBgn0032849	-0.413638	0.372874	0.060129	mRpS18B
FBgn0035360	0.653965	0.372874	0.0601806	CG1246
FBgn0038261	1.40491	0.372874	0.0601957	CG14856
FBgn0267385	-0.273238	0.372874	0.0602188	PyK
FBgn0034062	0.311026	0.372874	0.0602496	CG8388
FBgn0026079	-0.425866	0.373548	0.0605399	Nsun2
FBgn0036620	-3.5176	0.373548	0.0605452	CG4842
FBgn0033645	2.13928	0.373548	0.0605576	CG13196
FBgn0029799	-0.457976	0.373548	0.0605706	CG15772
FBgn0052027	0.649564	0.373548	0.0605844	CR32027
FBgn0003257	-0.324447	0.373548	0.0606119	r-l
FBgn0000316	-0.213865	0.373833	0.0607003	cin
FBgn0031092	-0.412167	0.374775	0.0608956	CG9577
FBgn0010269	0.237349	0.375138	0.060997	Dsor1
FBgn0031004	-0.415864	0.37595	0.0612014	CG7992
FBgn0034989	0.304962	0.37595	0.0613534	CG3356
FBgn0003401	-0.640592	0.37595	0.0613658	shu
FBgn0039254	0.435591	0.37595	0.0614008	Nmnat
FBgn0032236	-0.364104	0.37595	0.0614449	mRpS7
FBgn0261801	0.537022	0.37595	0.0614561	CG42747
FBgn0261989	1.81295	0.37595	0.0614642	CG42807
FBgn0038924	-0.359144	0.37595	0.0614922	CG6028
FBgn0034748	0.221312	0.37595	0.0615114	CG17807
FBgn0034279	-0.343627	0.376448	0.0616591	CG18635
FBgn0037534	-1.63536	0.376448	0.0616799	CG2781
FBgn0052783	1.1889	0.376448	0.0617244	CG32783
FBgn0002775	-0.440155	0.376448	0.061763	msl-3
FBgn0029084	-1.18884	0.378325	0.0621901	gom
FBgn0013717	0.313684	0.378325	0.0621968	not
FBgn0015621	0.233678	0.378325	0.0621991	Clp
FBgn0036515	-0.257942	0.378644	0.0622944	CG12304
FBgn0032876	0.515701	0.379036	0.0624512	Cen
FBgn0000139	-0.313276	0.379036	0.0624699	ash2
FBgn0040078	-0.323996	0.379036	0.062516	pont
FBgn0037730	1.15261	0.379036	0.0625302	CG9444
FBgn0030518	-0.347992	0.379281	0.0626215	CG11134
FBgn0037012	0.426955	0.379281	0.0626564	Rcd2
FBgn0040337	-0.357975	0.379641	0.0627588	CG3021
FBgn0025366	-0.498636	0.379985	0.0628855	Ip259
FBgn0016930	-0.260123	0.379985	0.0629015	Dyrk2
FBgn0264294	-0.23323	0.380282	0.0629936	Cyt-b5
FBgn0029843	0.838486	0.380574	0.0630894	Nep1
FBgn0039687	-0.982388	0.380574	0.0631387	CG7593
FBgn0002645	-0.380558	0.380574	0.0631711	Map205
FBgn0035998	0.421544	0.380613	0.0632527	CG3437
FBgn0028546	-0.226349	0.380613	0.0632635	ics
FBgn0045474	1.19011	0.380792	0.0633626	Gr77a
FBgn0037543	-0.251811	0.380792	0.0633792	CG10903
FBgn0036512	-0.383893	0.382072	0.0636356	CG16979
FBgn0030004	0.374574	0.382276	0.0637126	CG10958
FBgn0025802	-0.550477	0.382487	0.063791	Sbf
FBgn0031980	-0.543986	0.383298	0.0639696	RpL36A
FBgn0011573	-0.254142	0.383366	0.064106	Cdc37
FBgn0052115	-0.343228	0.383366	0.0641476	CG32115
FBgn0050389	0.30768	0.383366	0.0641489	CG30389
FBgn0037874	-0.298281	0.383366	0.0641543	Tctp
FBgn0050085	-0.374025	0.383474	0.0642531	Rif1
FBgn0002022	-0.264555	0.383474	0.0642768	Catsup
FBgn0032122	-2.48146	0.383474	0.0643023	CG31883
FBgn0037240	-0.317888	0.383857	0.0644334	Cont
FBgn0053127	-0.660103	0.383857	0.0644533	CG33127
FBgn0030316	0.275465	0.384079	0.064534	CG11695
FBgn0031498	0.465128	0.384506	0.0646491	CG17260
FBgn0038369	-0.325083	0.384515	0.0647293	Arpc3A
FBgn0038834	-0.536524	0.384515	0.0647375	RpS30
FBgn0052817	0.625268	0.384791	0.0648274	CG32817
FBgn0038811	-0.439115	0.384911	0.0649028	CG4159
FBgn0034114	0.386126	0.384911	0.0650094	CG4282
FBgn0037081	0.238705	0.384911	0.065056	barc
FBgn0069913	1.51214	0.384911	0.0650624	CG4681
FBgn0020647	0.397397	0.384911	0.0650652	KrT95D
FBgn0250755	-0.368475	0.385179	0.0652216	CG42233
FBgn0266673	-0.374904	0.385179	0.0652315	Sec10
FBgn0264855	-0.332965	0.385179	0.0652411	AP-2alpha
FBgn0000611	-0.231521	0.386527	0.0655201	exd
FBgn0034259	-0.263033	0.386527	0.0655568	P32
FBgn0046301	0.267683	0.38722	0.065718	CG7148
FBgn0032397	-0.247342	0.388308	0.0659466	Tom70
FBgn0010397	-0.277901	0.389055	0.0661253	LamC
FBgn0035532	-0.568224	0.389055	0.0661613	CG15014
FBgn0000414	-0.933877	0.389361	0.0662574	Dab
FBgn0010333	-0.189916	0.390265	0.0664553	Rac1
FBgn0033312	0.510296	0.392237	0.0668553	CG8642
FBgn0025625	0.519017	0.392237	0.0668797	Sik2
FBgn0039304	-0.244273	0.392655	0.0669953	CG10425
FBgn0002571	1.18033	0.393175	0.0671434	Mal-A3
FBgn0050285	0.985391	0.393175	0.0672993	CG30285
FBgn0011509	-0.271193	0.393175	0.0673026	SrpRbeta
FBgn0260482	1.38478	0.393175	0.0673321	CG32599
FBgn0028694	-0.235954	0.393175	0.0673442	Rpn11
FBgn0029896	1.74984	0.393175	0.0673507	CG3168
FBgn0032002	0.57158	0.394299	0.0675877	CG8353
FBgn0031707	1.15963	0.394483	0.0676638	CG14020
FBgn0087007	0.539203	0.394604	0.0677468	bbg
FBgn0010348	-0.199741	0.394604	0.0677737	Arf79F
FBgn0087013	-0.20663	0.395879	0.0680374	Karybeta3
FBgn0004406	0.320226	0.396809	0.0683052	tam
FBgn0020235	-0.28976	0.396809	0.0683133	ATPsyn-gamma
FBgn0005592	0.613006	0.396809	0.0683318	btl
FBgn0031285	-0.242222	0.397048	0.0684179	CG3662
FBgn0027338	-0.200538	0.397666	0.0685846	Kap-alpha3
FBgn0038332	-0.345499	0.397666	0.0686143	CG6136
FBgn0082994	-1.72593	0.398167	0.06879	snoRNA:Psi28S-1837c
FBgn0039816	2.03622	0.398167	0.0687907	CG11317
FBgn0052702	0.585658	0.398335	0.0688647	Cubn
FBgn0032264	0.808916	0.398353	0.0690006	Lip4
FBgn0034504	0.238496	0.398353	0.0690693	CG8929
FBgn0037251	-0.482316	0.398353	0.0691113	CG9804
FBgn0010265	-0.367563	0.398353	0.0692697	RpS13
FBgn0037328	-0.502368	0.398353	0.0693036	RpL35A
FBgn0033204	-0.432899	0.398353	0.0693333	CG2065
FBgn0039904	0.302678	0.398353	0.0693567	Hcf
FBgn0001168	0.37449	0.398353	0.069367	h
FBgn0039182	-0.412415	0.398353	0.0693691	CG5728
FBgn0033224	-0.279875	0.398353	0.0693701	Nop17l
FBgn0025109	-0.249667	0.398353	0.0693934	Bem46
FBgn0011211	-0.232527	0.398353	0.0694503	blw
FBgn0015568	-0.847351	0.398353	0.0694529	alpha-Est1
FBgn0020493	0.420601	0.398648	0.0695495	Dad
FBgn0051324	0.502753	0.399156	0.0696831	CG31324
FBgn0267384	-0.203653	0.39919	0.0697423	Ubc7
FBgn0262353	-0.398001	0.39919	0.0697794	CR43051
FBgn0030028	0.974289	0.399559	0.0699306	Corp
FBgn0037550	0.392458	0.399559	0.0700183	CG9667
FBgn0261596	-0.486261	0.399559	0.0700235	RpS24
FBgn0030314	0.281066	0.399559	0.0700244	CG11696
FBgn0040237	-0.274314	0.399588	0.0700978	bor
FBgn0037998	0.237154	0.399588	0.0701198	CG4848
FBgn0000253	-0.259208	0.399855	0.0702483	Cam
FBgn0032721	-0.277528	0.399855	0.070257	CG10602
FBgn0019957	-0.286736	0.400044	0.0703438	ND42
FBgn0033884	0.431505	0.400044	0.0704062	CG13344
FBgn0037741	0.317257	0.400044	0.0704259	CG16908
FBgn0035620	-2.52854	0.400127	0.0705198	CG5150
FBgn0037383	-1.12215	0.400127	0.0705369	CG2023
FBgn0038903	-0.487015	0.400127	0.070576	RpI12
FBgn0003279	-0.477181	0.400332	0.0707179	RpL4
FBgn0037262	0.238389	0.400332	0.0707594	MED31
FBgn0002590	-0.494092	0.400332	0.0707932	RpS5a
FBgn0035995	0.25792	0.400332	0.0707933	CG3529
FBgn0263831	0.409681	0.401087	0.0709721	Gen
FBgn0025814	-0.491279	0.401123	0.0710237	Mgstl
FBgn0033017	-0.24475	0.40148	0.0711322	CG10465
FBgn0010352	-0.246384	0.401786	0.0713143	Nc73EF
FBgn0028992	-0.282488	0.401786	0.0713261	sds22
FBgn0050008	0.634028	0.401786	0.0713627	CG30008
FBgn0034087	-0.306307	0.401786	0.0713681	clu
FBgn0024558	-0.21284	0.401886	0.0714495	Dph5
FBgn0037244	-0.240289	0.401886	0.0714767	CG14647
FBgn0017578	-0.241845	0.40216	0.0716078	Max
FBgn0034928	-1.65176	0.40216	0.0716163	CG13562
FBgn0015245	-0.217361	0.402432	0.0717102	Hsp60
FBgn0267792	0.270646	0.402919	0.0718425	rgr
FBgn0003984	0.707659	0.4033	0.071956	vn
FBgn0085249	2.56202	0.403982	0.0721233	CG34220
FBgn0036576	0.381756	0.404252	0.0722211	CG5151
FBgn0013272	-0.290068	0.404252	0.0722629	Gp150
FBgn0017577	-0.414737	0.404848	0.0724365	Mcm5
FBgn0024289	0.997002	0.404848	0.0724609	Sodh-1
FBgn0015794	-0.228868	0.404904	0.072526	Rab18
FBgn0030660	0.285167	0.404904	0.072602	CG8097
FBgn0037001	-0.210045	0.404904	0.0726355	CG6020
FBgn0030936	0.978265	0.404904	0.0726539	CG6481
FBgn0002622	-0.424793	0.406539	0.0729933	RpS3
FBgn0029881	-0.43614	0.406886	0.0731257	pigs
FBgn0022787	0.275035	0.406886	0.0731476	Hel89B
FBgn0264983	-0.523846	0.40691	0.0731979	CR44134
FBgn0003386	1.93874	0.407715	0.0734475	Shaw
FBgn0052669	-0.490348	0.407715	0.0734713	CG32669
FBgn0051320	0.456244	0.407715	0.0734839	CG31320
FBgn0010350	-0.392991	0.407715	0.073568	CdsA
FBgn0033235	-0.261125	0.407715	0.073573	CG8728
FBgn0035091	1.14421	0.408849	0.0738238	CG3829
FBgn0035309	0.458422	0.409543	0.073997	CG15879
FBgn0033471	-0.294376	0.409543	0.0740417	CG12134
FBgn0027949	-0.425716	0.410076	0.0741844	msb1l
FBgn0000594	0.663054	0.410093	0.074236	Est-P
FBgn0034420	-0.378022	0.410093	0.0742883	CG10737
FBgn0040305	0.235272	0.410093	0.074388	MTF-1
FBgn0038109	0.777187	0.410093	0.0743914	CG11656
FBgn0033054	1.3202	0.410093	0.0744191	CG14591
FBgn0033846	0.384988	0.410119	0.0745091	mip120
FBgn0038300	0.39411	0.410119	0.0745654	CG4203
FBgn0032444	-0.21535	0.410119	0.074594	CG5525
FBgn0026741	-0.409644	0.410119	0.0746169	mRpL18
FBgn0035601	-0.211904	0.410119	0.0746556	Uev1A
FBgn0030851	-0.687705	0.410351	0.0747524	CG8326
FBgn0029945	-1.02124	0.410351	0.0748301	CG18155
FBgn0026598	0.295551	0.410351	0.0748917	Apc2
FBgn0043362	0.757959	0.410351	0.0749543	bchs
FBgn0030035	-0.339491	0.410351	0.0749665	CG11190
FBgn0032925	-0.313126	0.410351	0.074976	CG9246
FBgn0035673	0.712411	0.410393	0.0750369	CG6602
FBgn0003744	0.220367	0.410393	0.0750764	trc
FBgn0035078	1.19488	0.411416	0.0753518	Tpc2
FBgn0042206	0.798395	0.411416	0.0753874	GstD10
FBgn0037834	-0.274276	0.411416	0.0754031	Art1
FBgn0265058	0.753195	0.411464	0.0755222	CR44169
FBgn0036821	1.62456	0.411464	0.0755449	CG3961
FBgn0034924	1.66853	0.411464	0.0755895	CG17658
FBgn0030863	0.279189	0.411464	0.0755977	CG8188
FBgn0039756	-0.284264	0.4115	0.0756509	CG9743
FBgn0015600	0.696463	0.411676	0.0757298	toc
FBgn0028372	0.435008	0.4127	0.0760107	isopeptidase-T-3
FBgn0035251	-0.232132	0.4127	0.0760546	CG7967
FBgn0042101	0.685728	0.4127	0.076058	CG18744
FBgn0031830	-0.332224	0.412802	0.076301	CoVb
FBgn0029503	-0.493657	0.412802	0.0763348	CHORD
FBgn0038741	0.429468	0.412802	0.0764109	CG17186
FBgn0028481	2.01409	0.412802	0.0764446	CG4341
FBgn0039490	1.18512	0.412802	0.0764641	CG5882
FBgn0037184	0.381852	0.412802	0.0764843	CG14450
FBgn0038326	-0.214257	0.412802	0.0764853	CG5044
FBgn0032813	1.08606	0.412802	0.0765108	CG10262
FBgn0040805	0.76241	0.412802	0.076538	CG12355
FBgn0259710	0.840434	0.412802	0.0765829	CG42364
FBgn0030141	-0.290833	0.412802	0.0766034	Gga
FBgn0045063	0.26139	0.412802	0.0766366	fdl
FBgn0264892	0.33534	0.41318	0.0767535	CR44083
FBgn0033028	0.213483	0.413242	0.0768117	CG11665
FBgn0031813	-0.401716	0.413431	0.0769529	CG9527
FBgn0033519	0.573525	0.413431	0.0769589	CG11825
FBgn0259483	0.188246	0.413431	0.0769869	Mob4
FBgn0038224	-0.364039	0.413516	0.0771754	CG3321
FBgn0027339	0.273519	0.413516	0.0771911	jim
FBgn0266687	-1.27652	0.413516	0.077223	CR45177
FBgn0023513	0.31501	0.413516	0.0772236	CG14803
FBgn0031987	-0.3326	0.413516	0.0772363	CG12375
FBgn0004867	-0.49774	0.413553	0.0772901	RpS2
FBgn0033079	-0.255418	0.413646	0.0773542	Fmo-2
FBgn0039589	-0.304272	0.41376	0.0774222	CG9986
FBgn0026787	0.300338	0.415907	0.0778737	Nhe1
FBgn0014931	0.610667	0.415907	0.077939	CG2678
FBgn0038324	0.364305	0.415907	0.0779649	CG5038
FBgn0023175	-0.246894	0.416878	0.0781941	Prosalpha7
FBgn0259711	0.58116	0.418089	0.0784701	CG42365
FBgn0022768	0.484112	0.418089	0.0785157	Pp2C1
FBgn0037298	-0.208687	0.418169	0.078578	CG2604
FBgn0025463	0.198949	0.41823	0.078684	Bap60
FBgn0019686	0.239509	0.41823	0.0786985	lok
FBgn0029176	-0.321434	0.41823	0.0787312	Ef1gamma
FBgn0265605	0.300835	0.41848	0.0788802	Ric
FBgn0037899	-0.349611	0.41848	0.0789008	RpL24-like
FBgn0034172	0.267907	0.41848	0.0789201	CG6665
FBgn0037661	-0.750511	0.418827	0.079033	Ada
FBgn0266186	-0.252004	0.419328	0.0791818	Vamp7
FBgn0035283	0.443098	0.419328	0.0792409	CG12024
FBgn0029714	-0.356551	0.419328	0.0792696	CG3527
FBgn0001995	-0.392638	0.419353	0.0793216	mRpL4
FBgn0023023	0.814025	0.419475	0.0793923	CRMP
FBgn0005777	-0.290614	0.419617	0.0795087	PpD3
FBgn0034964	0.216833	0.419617	0.0795139	IntS1
FBgn0038049	-0.330629	0.421046	0.0798478	CG5844
FBgn0002593	-0.403329	0.421046	0.0798934	RpLP1
FBgn0030719	-0.233429	0.421046	0.0799364	eIF5
FBgn0266449	-0.201957	0.421046	0.0800064	Kr-h2
FBgn0034985	1.44528	0.421046	0.0800225	CG3328
FBgn0040507	1.64747	0.421236	0.080144	ACXD
FBgn0033897	0.202886	0.421236	0.0801538	Rcd1
FBgn0087021	-0.52255	0.421446	0.080353	Spc25
FBgn0037369	-0.290367	0.421446	0.0804334	CG2100
FBgn0262902	0.594388	0.421446	0.0804685	CR43257
FBgn0035999	0.301959	0.421446	0.0804911	CG3552
FBgn0031824	-0.271541	0.421446	0.0805076	CG9547
FBgn0053532	-1.41173	0.421446	0.080552	lectin-37Da
FBgn0036035	-0.270272	0.421446	0.0805622	CG18178
FBgn0266399	0.543538	0.421446	0.0805919	CR45039
FBgn0031452	-0.381938	0.421446	0.0806455	Cwc25
FBgn0034187	0.512833	0.421446	0.0807494	CG6967
FBgn0030858	0.216187	0.421446	0.0807597	IntS2
FBgn0042102	0.412721	0.421446	0.0807652	CG18745
FBgn0035852	0.866718	0.422149	0.0809477	CG7387
FBgn0037025	-0.371527	0.422344	0.0810824	Spc105R
FBgn0033240	-0.483198	0.422344	0.0811425	CG2906
FBgn0030799	-0.397299	0.422344	0.0811751	CG4872
FBgn0035964	-0.386297	0.422344	0.0811759	Dhpr
FBgn0052075	-0.516449	0.422351	0.081225	CG32075
FBgn0262357	2.66404	0.422961	0.0813901	CG43055
FBgn0010292	-0.275363	0.423301	0.0815764	bys
FBgn0037846	0.642124	0.423301	0.0815884	CG6574
FBgn0035211	0.326103	0.423301	0.0815991	CG2211
FBgn0053229	0.453603	0.423551	0.0816951	CG33229
FBgn0027779	-0.216363	0.425155	0.0820607	VhaSFD
FBgn0035521	1.59354	0.425155	0.0821006	VhaM9.7-a
FBgn0039347	1.47869	0.425171	0.0821784	CG5071
FBgn0035036	0.424827	0.425171	0.0821997	CG4707
FBgn0035057	1.15308	0.425245	0.0823354	CG3880
FBgn0039359	-0.507378	0.425245	0.0823659	RpL27
FBgn0033907	-0.394668	0.425245	0.0823894	mRpS16
FBgn0000376	0.248603	0.425245	0.0824063	crm
FBgn0026261	-0.411151	0.42545	0.0824939	bonsai
FBgn0032833	-0.281193	0.425884	0.0826264	CoIV
FBgn0014028	-0.245923	0.427172	0.0829244	SdhB
FBgn0033538	-0.430867	0.427752	0.0830853	CG11883
FBgn0264272	-2.48831	0.428409	0.0834039	mwh
FBgn0015789	-0.177333	0.428409	0.0834543	Rab10
FBgn0031093	-0.239767	0.428409	0.0834562	CG9581
FBgn0026679	0.25007	0.428409	0.0834939	IntS4
FBgn0033872	2.23714	0.428409	0.0835347	CG6329
FBgn0034657	-0.526378	0.428409	0.0835484	LBR
FBgn0036959	0.325209	0.428409	0.0835673	CG6951
FBgn0052057	0.483437	0.428409	0.0836003	dpr10
FBgn0030737	0.848967	0.429029	0.0838393	CG9914
FBgn0036825	-0.518704	0.429029	0.0838716	RpL26
FBgn0052801	0.943327	0.429029	0.0839041	CG32801
FBgn0035032	-0.326493	0.429029	0.0839191	CG4692
FBgn0023407	0.329932	0.429029	0.0839636	B4
FBgn0028394	0.360358	0.429324	0.08407	CG17834
FBgn0264305	0.380274	0.429609	0.0841744	CG43783
FBgn0031099	0.303693	0.429609	0.0842229	CG17065
FBgn0040068	0.30156	0.430279	0.0844028	Vav
FBgn0014411	-0.229902	0.431162	0.0846698	Vps26
FBgn0050021	1.02385	0.431162	0.0847002	metro
FBgn0039946	0.399396	0.431162	0.0847221	ATbp
FBgn0029785	-0.452062	0.431162	0.0847709	RpL35
FBgn0264549	1.01726	0.431384	0.0848632	CR43928
FBgn0015360	0.285115	0.431513	0.0849374	oxt
FBgn0030177	-0.272948	0.431537	0.0849909	CG2972
FBgn0038349	-0.347983	0.432736	0.0852758	AOX3
FBgn0030431	0.239413	0.433173	0.0854109	CG4407
FBgn0265377	1.26461	0.433344	0.0854936	CR44318
FBgn0030608	0.230353	0.433895	0.0857846	Lsd-2
FBgn0028509	-0.23388	0.433895	0.0858143	CenG1A
FBgn0033316	-0.388129	0.433895	0.0858265	CG14749
FBgn0260866	0.345149	0.433895	0.085837	dnr1
FBgn0051999	0.440717	0.433895	0.0858475	CG31999
FBgn0030759	-0.381352	0.433934	0.0859043	CG13014
FBgn0264862	0.633418	0.434061	0.0859785	CR44053
FBgn0040687	1.28795	0.434553	0.0861812	CG14645
FBgn0026431	-0.302065	0.434553	0.0862036	Grip75
FBgn0266700	-0.318489	0.434553	0.0862231	CR45190
FBgn0038947	-0.220834	0.43489	0.0863391	Sar1
FBgn0032698	-0.548744	0.43517	0.0864865	CG10336
FBgn0001296	-0.278044	0.43517	0.086493	kar
FBgn0030005	0.86918	0.435958	0.0867005	CG2120
FBgn0038675	0.342258	0.435958	0.0867582	CG6013
FBgn0039554	0.221361	0.435958	0.0868086	CG5003
FBgn0016685	-0.256752	0.435958	0.0868467	Nlp
FBgn0266215	-0.350792	0.437354	0.0872158	CR44910
FBgn0037448	1.68522	0.437354	0.0872683	CG15186
FBgn0039697	-0.229669	0.437354	0.0872731	CG7834
FBgn0024320	-0.280822	0.437433	0.0873383	Npc1a
FBgn0030716	1.59635	0.437478	0.0874409	CG9170
FBgn0263131	2.49829	0.437478	0.0874461	CG43373
FBgn0001124	-0.183264	0.437769	0.0875538	Got1
FBgn0029088	0.306914	0.439087	0.087867	disp
FBgn0039475	2.18679	0.439166	0.0879324	CG6277
FBgn0051363	0.50349	0.440075	0.0881641	Jupiter
FBgn0038455	0.467231	0.440246	0.0882482	CG14907
FBgn0032908	0.643374	0.440674	0.0883977	CG9270
FBgn0036775	-0.280504	0.440674	0.0884336	CG5147
FBgn0004957	0.342955	0.440828	0.0885642	por
FBgn0035996	0.517952	0.440828	0.0886244	CG3448
FBgn0039827	0.97657	0.440828	0.0886262	CG1544
FBgn0265302	0.981395	0.440828	0.088763	CR44275
FBgn0016983	-0.164306	0.440828	0.0887656	smid
FBgn0034261	0.433175	0.440828	0.0887883	HPS4
FBgn0026373	-0.332112	0.440828	0.0888343	RpII33
FBgn0034628	-0.55567	0.440828	0.0889108	Acox57D-p
FBgn0025837	-2.07785	0.440828	0.0889613	CG17636
FBgn0086912	-0.278717	0.440828	0.0889917	mbm
FBgn0039338	0.259365	0.440828	0.0890125	XNP
FBgn0037719	0.325429	0.440947	0.0890893	bocksbeutel
FBgn0039902	0.211953	0.440947	0.0891625	Zip102B
FBgn0025186	0.262789	0.440947	0.089186	ari-2
FBgn0032935	0.277994	0.442604	0.089571	Atg18b
FBgn0011661	-0.233582	0.442758	0.0896522	Moe
FBgn0030946	0.183632	0.443123	0.0897762	CG6659
FBgn0025680	-0.279981	0.444211	0.0900468	cry
FBgn0034804	0.61167	0.44474	0.0903356	CG3831
FBgn0023510	-0.350072	0.44474	0.0903466	Rbcn-3B
FBgn0034786	0.32047	0.44474	0.0905586	CG13531
FBgn0053978	1.17272	0.44474	0.0905677	CG33978
FBgn0003890	-0.215646	0.44474	0.0905705	betaTub97EF
FBgn0034137	0.946783	0.44474	0.0905722	CG4945
FBgn0032882	-0.309527	0.44474	0.0906413	Ns4
FBgn0030052	0.228861	0.44474	0.0906446	CG12065
FBgn0039043	0.894735	0.44474	0.0906485	CG17121
FBgn0266284	-0.210149	0.44474	0.0906565	Ns3
FBgn0034967	-0.453596	0.444819	0.0907229	eIF-5A
FBgn0267487	-0.188211	0.445498	0.0909241	Ptp61F
FBgn0261599	-0.584028	0.445498	0.0909621	RpS29
FBgn0035876	0.386337	0.445605	0.0910343	Pex2
FBgn0052221	0.302028	0.445782	0.0911486	CG32221
FBgn0038388	0.378246	0.445782	0.0912654	CG4287
FBgn0016013	0.945787	0.445782	0.0912708	Faa
FBgn0010411	-0.440985	0.445782	0.091272	RpS18
FBgn0027615	-0.287781	0.446551	0.0914854	CG6404
FBgn0033258	0.522113	0.446551	0.091556	CG8712
FBgn0261385	-0.289483	0.446551	0.0916088	scra
FBgn0035591	-0.353103	0.446551	0.0916313	CG4611
FBgn0052212	-0.355051	0.446905	0.0917544	CG32212
FBgn0038183	-0.304244	0.447239	0.0918736	CG9286
FBgn0261862	0.335684	0.44769	0.0920257	whd
FBgn0036986	-1.11858	0.44769	0.0920673	CG5282
FBgn0002522	0.326851	0.44791	0.0921632	lab
FBgn0036030	-0.24456	0.448312	0.0922966	CG6767
FBgn0035524	-0.254096	0.448455	0.0923984	CG11583
FBgn0023541	0.636924	0.448455	0.0924637	Cyp4d14
FBgn0039854	-0.263789	0.448455	0.0924831	CG1635
FBgn0015664	-0.253761	0.448455	0.0925287	Dref
FBgn0015622	-0.282032	0.44872	0.0926341	Cnx99A
FBgn0261243	-0.179346	0.448765	0.0927741	Psa
FBgn0015519	1.19109	0.448765	0.0927816	nAChRalpha3
FBgn0031518	0.25176	0.448765	0.0927956	CG3277
FBgn0266711	-0.274485	0.449715	0.0931594	EloC
FBgn0030749	0.201699	0.449715	0.0931627	AnxB11
FBgn0036254	-0.539045	0.449715	0.0931889	CG5645
FBgn0024315	0.611288	0.449715	0.0932232	Picot
FBgn0037686	-0.49209	0.449715	0.093246	RpL34b
FBgn0027508	0.202784	0.449855	0.0933475	Tnks
FBgn0087035	0.22002	0.449855	0.0933766	AGO2
FBgn0036519	-0.319986	0.449895	0.0934358	CG7650
FBgn0015772	0.345373	0.450016	0.093575	Nak
FBgn0031610	-0.544194	0.450016	0.093613	CG15436
FBgn0051098	0.512403	0.450016	0.0936359	CG31098
FBgn0051852	-0.274921	0.450016	0.0936643	Tap42
FBgn0061492	-0.30385	0.450297	0.0937737	loj
FBgn0261872	0.26642	0.450447	0.0938558	scaf6
FBgn0040388	-0.25176	0.451683	0.094202	boi
FBgn0267697	1.02801	0.451683	0.0942639	CR46033
FBgn0265140	-0.347664	0.451683	0.0942983	Meltrin
FBgn0028583	-2.78401	0.451683	0.0943238	lcs
FBgn0021767	0.735126	0.451683	0.0943685	org-1
FBgn0004598	-0.294003	0.451953	0.0945435	Fur2
FBgn0036935	1.44574	0.451953	0.0945773	CG14186
FBgn0267770	0.314197	0.451953	0.0946279	CR46101
FBgn0024179	0.344587	0.451953	0.0946292	wit
FBgn0032407	-0.248331	0.453047	0.0949094	Pex19
FBgn0032029	0.388072	0.453204	0.0949937	CG17292
FBgn0003301	-0.557774	0.453822	0.0953344	rut
FBgn0028497	0.183909	0.453822	0.0953746	CG3530
FBgn0040959	-2.14595	0.453822	0.0954496	Peritrophin-15a
FBgn0038993	1.75983	0.453822	0.0954892	CG13843
FBgn0036240	0.268666	0.453822	0.0957173	CG6928
FBgn0033474	0.195641	0.453822	0.0958384	CG1407
FBgn0037643	-0.223295	0.453822	0.0958391	skap
FBgn0034442	0.496401	0.453822	0.0958548	CG11257
FBgn0266042	0.779471	0.453822	0.0958855	CR44807
FBgn0263106	-0.818097	0.453822	0.0959435	DnaJ-1
FBgn0032235	0.189037	0.453822	0.0959489	CG5096
FBgn0263025	0.531384	0.453822	0.0959968	CG43320
FBgn0036908	-0.354062	0.453822	0.0960213	CG14103
FBgn0014930	-0.250776	0.453822	0.0960525	CG2846
FBgn0033814	-0.216003	0.453822	0.0960715	CG4670
FBgn0019952	0.402986	0.453822	0.0960904	Orct
FBgn0083027	0.449367	0.453822	0.0961449	snoRNA:Psi18S-531
FBgn0263987	-0.240012	0.453822	0.0961711	spoon
FBgn0010651	0.322047	0.453822	0.0961819	l(2)08717
FBgn0000588	-0.627716	0.453822	0.0963208	esc
FBgn0037632	-0.213941	0.453822	0.0963319	Tcp-1eta
FBgn0039274	-0.273765	0.453822	0.096349	CG11920
FBgn0032243	0.23297	0.453822	0.0963537	Klp31E
FBgn0016075	-2.12995	0.453822	0.0964166	vkg
FBgn0033303	-0.40267	0.453822	0.0964446	Cyp6a15Psi
FBgn0023081	0.255573	0.453822	0.096464	gek
FBgn0040392	-0.874792	0.453822	0.0965077	CG14050
FBgn0030584	-0.347605	0.454157	0.0966674	CG14407
FBgn0019936	-0.499342	0.454157	0.0966815	RpS20
FBgn0029922	0.212413	0.45419	0.0967939	CG14431
FBgn0013276	-1.42098	0.45419	0.0967996	Hsp70Ab
FBgn0267768	-0.298092	0.45419	0.0968425	CR46099
FBgn0038273	0.339556	0.45466	0.0969941	CG14860
FBgn0085265	-0.376117	0.454863	0.0970889	CG34236
FBgn0053213	-0.758737	0.45607	0.0973979	CG33213
FBgn0029506	0.633272	0.456773	0.0975998	Tsp42Ee
FBgn0024728	0.178447	0.457036	0.0977552	Slip1
FBgn0023091	1.5381	0.457036	0.0977592	dimm
FBgn0260399	-0.567524	0.457749	0.0979877	gwl
FBgn0022960	0.186313	0.457749	0.0980151	vimar
FBgn0033065	-0.77119	0.458088	0.0981658	Cyp6w1
FBgn0025352	-0.221761	0.458088	0.0982041	Thiolase
FBgn0053062	-0.655045	0.458088	0.0983947	CG33062
FBgn0036665	1.75498	0.458088	0.0984089	CG13024
FBgn0030997	0.658149	0.458088	0.0984486	CG7990
FBgn0029629	-0.338871	0.458088	0.0984618	CG8636
FBgn0053307	-2.24593	0.458088	0.0985127	CG33307
FBgn0260049	-0.230942	0.458088	0.098569	flr
FBgn0030066	-0.464655	0.458088	0.098586	CG1885
FBgn0015756	-0.484707	0.458088	0.0986054	RpL9
FBgn0020278	0.248492	0.458172	0.098686	loco
FBgn0032147	0.280997	0.458172	0.09875	IP3K1
FBgn0026393	0.327572	0.458172	0.0988064	Or43b
FBgn0036663	-0.287323	0.458172	0.0988306	CG9674
FBgn0010409	-0.455979	0.45855	0.0989922	RpL18A
FBgn0033371	0.41636	0.45855	0.0990158	CNT1
FBgn0003482	0.70686	0.458694	0.0990987	spn-D
FBgn0042110	-1.44722	0.458812	0.0992451	CG18765
FBgn0000591	1.32441	0.458812	0.0992887	E(spl)m8-HLH
FBgn0051759	-0.374082	0.458812	0.0992956	CG31759
FBgn0038269	-0.230503	0.458812	0.0993315	Rrp6
FBgn0051267	1.06272	0.459687	0.0995918	CG31267
FBgn0000996	-0.273464	0.459687	0.0996249	dup
FBgn0031820	0.330857	0.459708	0.0996813	DLP
FBgn0261674	-0.315899	0.460428	0.0998895	CG42709
FBgn0024332	-0.33317	0.460666	0.0999931	Mcm3
FBgn0085405	-0.303104	0.461061	0.100131	CG34376
FBgn0050156	0.624159	0.461401	0.100387	CG30156
FBgn0040778	0.619799	0.461401	0.100425	CG17977
FBgn0003134	-0.271814	0.461401	0.100536	Pp1alpha-96A
FBgn0003090	0.427728	0.461401	0.100559	pk
FBgn0086856	-0.4831	0.461401	0.100589	CG11555
FBgn0050394	0.245238	0.461401	0.100592	CG30394
FBgn0032479	0.233079	0.461401	0.100615	CG16974
FBgn0002773	0.77155	0.461401	0.100622	Mlc2
FBgn0052549	0.30198	0.461473	0.100714	CG32549
FBgn0032131	-1.89009	0.461473	0.100788	CG3841
FBgn0039958	0.187117	0.461473	0.100833	CG12567
FBgn0263594	-0.225645	0.461473	0.100846	lost
FBgn0032812	0.215869	0.462459	0.101114	Hakai
FBgn0033960	1.82394	0.462666	0.101211	CG10151
FBgn0031191	0.32927	0.46282	0.101325	Cp110
FBgn0033088	0.402415	0.46282	0.10135	PGAP3
FBgn0263111	0.566541	0.463031	0.101448	cac
FBgn0085241	-2.67469	0.463071	0.101578	CG34212
FBgn0031066	-0.237387	0.463071	0.101716	CoVIb
FBgn0263766	0.320047	0.463071	0.101755	CR43683
FBgn0010053	-0.221212	0.463071	0.101814	Jheh1
FBgn0005640	0.226613	0.463071	0.101826	Eip63E
FBgn0038016	0.17864	0.463071	0.101834	MBD-R2
FBgn0017567	-0.257856	0.463071	0.101853	ND23
FBgn0024975	0.353265	0.463071	0.101876	CG2712
FBgn0051126	-0.400083	0.463532	0.10207	CG31126
FBgn0263451	-1.03663	0.463532	0.102082	CR43474
FBgn0040322	1.49404	0.463916	0.102219	GNBP2
FBgn0051922	0.429214	0.463975	0.102378	CG31922
FBgn0033317	-0.219747	0.463975	0.102403	CG8635
FBgn0032117	0.336411	0.463975	0.102426	FucTB
FBgn0266316	-0.344123	0.463975	0.102441	CR44981
FBgn0035693	1.52222	0.46472	0.102688	CG8219
FBgn0037506	-0.553548	0.46472	0.102711	CG1287
FBgn0052706	0.722943	0.464884	0.102821	CG32706
FBgn0262423	-0.925274	0.464884	0.102852	mir-281-2
FBgn0041096	0.654698	0.464998	0.10293	rols
FBgn0024227	-0.539305	0.465862	0.103383	aurB
FBgn0034310	-0.252254	0.465862	0.10343	Nup75
FBgn0038051	1.36217	0.465862	0.103437	CG17207
FBgn0003714	-0.302933	0.465862	0.103525	tko
FBgn0010612	-0.357425	0.465862	0.103564	l(2)06225
FBgn0052803	0.274851	0.465862	0.103573	CG32803
FBgn0032169	0.390651	0.465862	0.103594	CG4709
FBgn0000084	-0.307548	0.465862	0.103602	AnxB10
FBgn0014026	-0.460499	0.465862	0.103634	RpL7A
FBgn0025621	0.199294	0.465862	0.103691	CG16989
FBgn0085390	-0.617133	0.465862	0.1037	Dgk
FBgn0027784	0.297859	0.466393	0.10396	Prp18
FBgn0263531	1.03623	0.466393	0.103972	mir-4955
FBgn0043470	-2.43608	0.466393	0.103977	lambdaTry
FBgn0043903	-0.240093	0.466684	0.104094	dome
FBgn0032889	0.205947	0.46732	0.104289	CG9331
FBgn0039966	0.276804	0.467329	0.104344	Rab21
FBgn0014002	-0.280041	0.467984	0.104578	Pdi
FBgn0039066	-0.298873	0.467984	0.104614	EloA
FBgn0267698	-0.23597	0.467984	0.104649	Pak
FBgn0034009	0.313102	0.468089	0.104766	CG8155
FBgn0035059	0.236294	0.468089	0.104778	CG3894
FBgn0023169	-0.194618	0.469378	0.10512	AMPKalpha
FBgn0032030	-0.250009	0.470556	0.105459	Wdr82
FBgn0037339	-0.211094	0.470556	0.10564	Pi4KIIalpha
FBgn0013710	0.624063	0.470556	0.105663	mt:tRNA:Y
FBgn0032518	-0.483153	0.470556	0.105681	RpL24
FBgn0028525	-1.60732	0.470556	0.105682	c(2)M
FBgn0037358	-0.216051	0.470556	0.105728	elm
FBgn0263863	-0.222747	0.470556	0.105779	mRpL45
FBgn0052576	-0.366292	0.470556	0.105866	CG32576
FBgn0026722	0.310925	0.470556	0.105934	drosha
FBgn0022029	-0.2343	0.470556	0.10601	l(2)k01209
FBgn0266633	0.269076	0.470556	0.106112	CR45140
FBgn0261986	0.226701	0.470556	0.106165	RASSF8
FBgn0038524	0.318813	0.470556	0.106168	sll
FBgn0067864	-0.247693	0.470556	0.106215	Patj
FBgn0015553	-0.540286	0.470556	0.106222	tos
FBgn0038237	0.40442	0.470556	0.10631	Pde6
FBgn0038461	-0.374688	0.470556	0.106393	CG3678
[truncated: 15,560 more rows]

## Sheet: Old vs Young p<0.05
annotation_name	logFC	p	pval	symbol
FBgn0262636	-3.05669	0.0231503	0.000200204	Lin29
FBgn0030367	-2.91677	0.00156794	3.04661e-06	Cyp311a1
FBgn0262854	-1.86002	0.00156794	3.71137e-06	CG43218
FBgn0025641	-1.60623	0.00167876	4.93194e-06	DAAM
FBgn0035287	-1.56668	0.0313814	0.0003475	CG13937
FBgn0010225	-1.26076	0.0208299	0.000171818	Gel
FBgn0032297	-1.07928	0.00551555	2.43828e-05	CG17124
FBgn0034399	-1.02047	0.00534266	2.21889e-05	CG15083
FBgn0035907	-0.984564	0.0449057	0.000664706	GstO1
FBgn0024920	-0.984531	0.0231503	0.000201421	Ts
FBgn0058160	-0.976286	0.0454026	0.00068696	CG40160
FBgn0013995	-0.81554	0.0306132	0.00031478	Calx
FBgn0016131	-0.79056	0.00864551	4.88447e-05	Cdk4
FBgn0030309	-0.763986	0.0458985	0.000705162	CG1572
FBgn0026718	-0.739448	0.0306132	0.000314458	fu12
FBgn0038476	-0.723399	0.0133261	8.73347e-05	kuk
FBgn0036165	-0.684038	0.0368652	0.000445715	chrb
FBgn0040056	-0.656278	0.0140743	9.38289e-05	CG17698
FBgn0086687	-0.621061	0.0167681	0.000121261	Desat1
FBgn0032050	-0.618259	0.0305519	0.000290398	CG13096
FBgn0003068	-0.609709	0.0313814	0.000345873	per
FBgn0029969	-0.558917	0.0420091	0.000612336	CG10932
FBgn0033446	-0.558036	0.0324022	0.000366127	CG1648
FBgn0003996	-0.516749	0.0482593	0.000752518	w
FBgn0052103	0.551621	0.0411806	0.000578217	CG32103
FBgn0024244	0.552589	0.0449773	0.000670847	drm
FBgn0005612	0.553708	0.02272	0.000189975	Sox14
FBgn0040251	0.607734	0.0395738	0.000518707	Ugt86Di
FBgn0050414	0.654742	0.0265597	0.000243089	CG30414
FBgn0027572	0.658019	0.0362273	0.000433909	CG5009
FBgn0030246	0.65911	0.0395429	0.000513835	CG1582
FBgn0267733	0.676218	0.0199147	0.000159768	CR46064
FBgn0262970	0.708032	0.0305519	0.000303792	CR43281
FBgn0014018	0.730753	0.0411806	0.000565968	Rel
FBgn0028424	0.737497	0.0372195	0.000462615	JhI-26
FBgn0031322	0.746211	0.0166053	0.000116331	CG5001
FBgn0036993	0.778551	0.0305519	0.000302656	CG5910
FBgn0038804	0.808466	0.0151364	0.00010262	CG10877
FBgn0033875	0.82904	0.0166908	0.000118816	CG6357
FBgn0033174	0.836408	0.0434139	0.000637718	CG11125
FBgn0050456	0.844771	0.0207809	0.000169065	CG30456
FBgn0031805	0.852146	0.00768867	4.17012e-05	CG9505
FBgn0033978	0.852555	0.0133261	8.70853e-05	Cyp6a23
FBgn0004892	0.871552	0.0198619	0.000154856	sob
FBgn0037623	0.928855	0.0308716	0.00033139	CG9801
FBgn0034647	0.938934	0.00106093	1.55843e-06	pirk
FBgn0033928	1.00392	0.00716824	3.64487e-05	Arc2
FBgn0063494	1.00838	0.0305519	0.000299646	GstE6
FBgn0034931	1.02904	0.0420091	0.000611798	CG2812
FBgn0038842	1.03929	0.0413134	0.000588191	hdly
FBgn0030778	1.04073	0.0186055	0.000138753	CG4678
FBgn0053087	1.05149	0.0249535	0.000222997	LRP1
FBgn0031489	1.09045	0.00698808	3.4743e-05	CG17224
FBgn0040256	1.14383	0.00576224	2.73462e-05	Ugt86Dd
FBgn0041182	1.1629	0.00528409	2.08518e-05	Tep2
FBgn0023416	1.17932	0.010086	6.15415e-05	Ac3
FBgn0063493	1.18046	0.0199147	0.000158467	GstE7
FBgn0086359	1.24692	0.0411143	0.000552836	Invadolysin
FBgn0027550	1.24718	0.0186281	0.000141026	CG6495
FBgn0003944	1.30739	0.00563285	2.60957e-05	Ubx
FBgn0034156	1.31032	0.037394	0.00046901	CG5348
FBgn0002985	1.3379	0.000956438	9.72649e-07	odd
FBgn0032946	1.34867	0.03081	0.000327248	nrv3
FBgn0265759	1.34881	0.0306132	0.000314723	CR44566
FBgn0030976	1.35084	0.00752807	3.97055e-05	CG7378
FBgn0031490	1.37358	0.00356684	1.16879e-05	CG17264
FBgn0033799	1.37522	0.0326959	0.000377687	GLaz
FBgn0034480	1.39615	0.00982241	5.77342e-05	CG16898
FBgn0040837	1.4289	0.00106093	1.20216e-06	CG8620
FBgn0261873	1.43823	0.00449625	1.52415e-05	sdt
FBgn0038440	1.45325	0.0372195	0.000459072	Gr89a
FBgn0034639	1.47755	0.000764842	5.18537e-07	CG15673
FBgn0028990	1.48006	0.00156794	3.58497e-06	Spn27A
FBgn0023525	1.52281	0.00752807	3.99796e-05	CG3191
FBgn0034638	1.52673	0.030727	0.000322894	CG10433
FBgn0010041	1.53122	0.0372195	0.00045555	GstD5
FBgn0039927	1.53776	0.0362273	0.000432079	CG11155
FBgn0033926	1.54788	0.00156794	3.96804e-06	Arc1
FBgn0025525	1.55504	0.00483064	1.69209e-05	bab2
FBgn0051370	1.56901	0.000301509	1.23056e-07	CG31370
FBgn0086898	1.57485	0.0411806	0.000569303	dgo
FBgn0026592	1.58246	0.0386175	0.000493082	Fie
FBgn0000210	1.59373	0.0108843	6.88721e-05	br
FBgn0051436	1.60655	0.00156794	3.32239e-06	CG31436
FBgn0039315	1.6223	0.0305519	0.000298566	CG13658
FBgn0267486	1.63548	0.0281553	0.000260874	Ptp36E
FBgn0264542	1.68651	0.0163918	0.000112983	CG43921
FBgn0037525	1.69842	0.00209336	6.38653e-06	CG17816
FBgn0264907	1.70373	0.0305519	0.000293925	CG44098
FBgn0011822	1.74154	0.0198619	0.000153469	pcl
FBgn0003285	1.74309	0.0231503	0.000200097	rst
FBgn0050090	1.80051	0.00135895	2.14975e-06	CG30090
FBgn0039319	1.82957	0.000301509	1.40037e-07	CG13659
FBgn0026197	1.83337	0.030727	0.000319546	noe
FBgn0029710	1.89656	0.00136138	2.30743e-06	CG3568
FBgn0264745	1.90489	0.0249535	0.000220489	CR44003
FBgn0037844	1.90718	0.0383659	0.000485535	CG4570
FBgn0004635	1.95603	0.00156794	3.85127e-06	rho
FBgn0013323	1.9607	0.00156794	3.98504e-06	Ptth
FBgn0039316	1.96527	0.00106093	1.39119e-06	CG11893
FBgn0002735	2.07681	0.000301509	1.4716e-07	E(spl)mgamma-HLH
FBgn0261363	2.10024	0.00655917	3.18694e-05	PPO3
FBgn0051288	2.14917	0.000301509	1.70344e-07	CG31288
FBgn0010263	2.18118	0.00551555	2.49291e-05	Rbp9
FBgn0030723	2.20845	0.00161569	4.38154e-06	dpr18
FBgn0038721	2.2096	0.0315091	0.000352475	subdued
FBgn0004646	2.21765	0.000956438	8.32052e-07	ogre
FBgn0003710	2.27461	0.00156794	4.07487e-06	tipE
FBgn0262620	2.5748	0.00491656	1.79999e-05	CR43144
FBgn0030607	2.68714	0.00258887	8.19078e-06	dob
FBgn0262742	2.86842	0.0107674	6.6916e-05	Fas1
FBgn0052582	3.01876	0.0393299	0.000506622	CR32582
FBgn0031306	3.19055	0.0411806	0.000574953	CG4577
FBgn0004169	3.20086	0.0326959	0.000380528	up
FBgn0040726	3.2076	0.000956438	9.45373e-07	dpr
FBgn0035167	3.32175	0.00106093	1.44044e-06	Gr61a
FBgn0032629	3.36082	0.00534266	2.23826e-05	beat-IIIc
FBgn0263980	3.44786	0.0411806	0.00057468	CG43729
FBgn0260657	3.51268	0.0175278	0.000128736	CG42540
FBgn0000355	3.51452	0.0411806	0.000581647	Cp15
FBgn0052625	3.56541	0.00982241	5.85341e-05	CG32625
FBgn0051097	3.723	0.00982241	5.88235e-05	CG31097
FBgn0069969	3.82577	0.0454026	0.000687452	CG40498
FBgn0000015	3.85992	0.00534266	2.29402e-05	Abd-B
FBgn0267252	3.91873	0.0404299	0.000534497	Ggamma30A
FBgn0037630	3.98204	0.0408142	0.00054419	Ir85a
FBgn0261089	4.01824	0.000301509	6.43407e-08	Sytalpha
FBgn0032981	4.03834	0.00528409	2.08975e-05	CG3635
FBgn0052436	4.05095	0.0480847	0.000744362	CG32436
FBgn0264006	4.08107	0.0347219	0.000408031	dysc
FBgn0261041	4.09347	0.0326959	0.000378141	stj
FBgn0026403	4.10724	0.0420091	0.000611604	Ndg
FBgn0039972	4.13772	0.0458985	0.000705333	CG17018
FBgn0039201	4.23941	0.0308979	0.000335164	CG13617
FBgn0039282	4.49918	0.0249535	0.000225568	Bili
FBgn0030796	4.55521	0.00841378	4.65848e-05	CG4829
FBgn0003187	4.62138	0.00162799	4.59883e-06	qua
FBgn0000489	5.98165	0.00491656	1.83329e-05	Pka-C3

## Sheet: Geriatric vs Young unfiltered
annotation_name	logFC	p	pval	symbol
FBgn0033926	2.0663	0.000103048	1.15189e-08	Arc1
FBgn0262854	-2.54785	0.000166765	5.11955e-08	CG43218
FBgn0031490	2.10416	0.000166765	5.5924e-08	CG17264
FBgn0261089	3.9061	0.000181548	8.93191e-08	Sytalpha
FBgn0262620	3.47966	0.000181548	1.27642e-07	CR43144
FBgn0015038	1.52995	0.000181548	1.38239e-07	Cyp9b1
FBgn0038681	1.6287	0.000181548	1.42056e-07	Cyp12a4
FBgn0002735	2.25057	0.000240736	2.28808e-07	E(spl)mgamma-HLH
FBgn0051288	2.16441	0.000240736	2.42189e-07	CG31288
FBgn0003710	2.76763	0.000245868	2.97933e-07	tipE
FBgn0032981	4.49972	0.000245868	3.02319e-07	CG3635
FBgn0051370	1.39159	0.000351522	4.71525e-07	CG31370
FBgn0050090	1.87834	0.000431468	6.26994e-07	CG30090
FBgn0039316	2.2393	0.000528871	8.27655e-07	CG11893
FBgn0030189	1.26934	0.00061323	1.09013e-06	CG2909
FBgn0037525	1.91176	0.00061323	1.09677e-06	CG17816
FBgn0051436	1.58927	0.000620054	1.17828e-06	CG31436
FBgn0029766	0.882509	0.000698152	1.40473e-06	CG15784
FBgn0033928	1.21151	0.000734624	1.56023e-06	Arc2
FBgn0034639	1.39665	0.000739708	1.65372e-06	CG15673
FBgn0025641	-1.76964	0.000750057	1.84085e-06	DAAM
FBgn0029710	2.0316	0.000750057	1.84454e-06	CG3568
FBgn0040837	1.38228	0.000839318	2.20933e-06	CG8620
FBgn0040726	2.71053	0.000839318	2.25169e-06	dpr
FBgn0025525	2.25739	0.000875772	2.44738e-06	bab2
FBgn0039319	1.81386	0.000944404	2.74475e-06	CG13659
FBgn0034480	1.5886	0.000955571	2.89952e-06	CG16898
FBgn0030607	2.72932	0.000955571	2.99083e-06	dob
FBgn0026592	2.24479	0.00121737	4.02609e-06	Fie
FBgn0086254	-0.882335	0.00121737	4.20013e-06	CG6084
FBgn0031516	0.914391	0.00121737	4.21847e-06	CG9663
FBgn0030367	-4.25789	0.00125748	4.67005e-06	Cyp311a1
FBgn0010041	1.90087	0.00125748	4.71305e-06	GstD5
FBgn0036742	1.57733	0.00125748	4.77917e-06	CG7497
FBgn0003944	1.58866	0.00138738	5.42792e-06	Ubx
FBgn0002985	1.24961	0.00159828	6.43173e-06	odd
FBgn0000489	6.43356	0.00178791	7.51475e-06	Pka-C3
FBgn0032297	-1.03155	0.00178791	7.59452e-06	CG17124
FBgn0028990	1.37275	0.00191443	8.37576e-06	Spn27A
FBgn0031805	1.02561	0.00191443	8.55993e-06	CG9505
FBgn0035167	3.24885	0.00194335	8.9065e-06	Gr61a
FBgn0040360	1.12834	0.00211167	9.91393e-06	CG14626
FBgn0028424	0.997536	0.0021551	1.0418e-05	JhI-26
FBgn0035266	0.875405	0.0021551	1.05996e-05	Gk
FBgn0063494	1.37562	0.00217587	1.0945e-05	GstE6
FBgn0031489	1.1631	0.00232747	1.19678e-05	CG17224
FBgn0264987	2.80635	0.00420646	2.20997e-05	CR44138
FBgn0261363	2.22158	0.004594	2.55037e-05	PPO3
FBgn0015399	3.19944	0.004594	2.55185e-05	kek1
FBgn0026718	-0.9405	0.004594	2.59972e-05	fu12
FBgn0014018	0.807336	0.004594	2.61898e-05	Rel
FBgn0003187	3.93901	0.00523775	3.09946e-05	qua
FBgn0030723	2.43138	0.00523775	3.10307e-05	dpr18
FBgn0033188	-0.901671	0.00574598	3.4684e-05	Drat
FBgn0031643	0.914376	0.00584806	3.59539e-05	CG3008
FBgn0050414	0.777051	0.00605649	3.79123e-05	CG30414
FBgn0013323	1.83692	0.00618693	3.94798e-05	Ptth
FBgn0262476	2.01934	0.00618693	4.07685e-05	CG43066
FBgn0031322	0.741869	0.00618693	4.09939e-05	CG5001
FBgn0030778	1.27481	0.00618693	4.14952e-05	CG4678
FBgn0263974	4.57217	0.00625465	4.26485e-05	qin
FBgn0016131	-0.791521	0.00647821	4.50349e-05	Cdk4
FBgn0063493	1.30233	0.00647821	4.56212e-05	GstE7
FBgn0039818	-0.64731	0.00723904	5.17883e-05	CG11318
FBgn0014469	1.13455	0.00730803	5.31804e-05	Cyp4e2
FBgn0260755	1.0591	0.00730803	5.39157e-05	CG42553
FBgn0034647	0.778936	0.00743519	5.56927e-05	pirk
FBgn0262366	1.90569	0.00743519	5.65161e-05	CG43064
FBgn0263981	1.14168	0.00780626	6.07415e-05	CR43730
FBgn0261041	4.4049	0.00780626	6.10818e-05	stj
FBgn0010247	-0.66811	0.00786653	6.24327e-05	Parp
FBgn0039315	1.89456	0.00787519	6.33818e-05	CG13658
FBgn0033221	1.40003	0.00822702	6.72958e-05	CG12825
FBgn0010225	-1.47305	0.00822702	6.94214e-05	Gel
FBgn0262742	3.3133	0.00822702	6.95281e-05	Fas1
FBgn0060296	-0.624465	0.00822702	6.98919e-05	pain
FBgn0052625	3.56285	0.00859069	7.39418e-05	CG32625
FBgn0262636	-3.09399	0.00862528	7.52037e-05	Lin29
FBgn0036502	0.809916	0.00934106	8.25654e-05	CG7841
FBgn0037844	2.05541	0.00934106	8.35329e-05	CG4570
FBgn0041182	1.08035	0.00970677	8.78882e-05	Tep2
FBgn0003450	2.00419	0.009784	8.96812e-05	snk
FBgn0264960	3.0364	0.0103694	9.66552e-05	CR44129
FBgn0034067	0.955095	0.0103694	9.7485e-05	CG8399
FBgn0010042	3.81326	0.0103694	9.94113e-05	GstD6
FBgn0063497	1.16705	0.0103694	0.000100054	GstE3
FBgn0019650	3.15845	0.0103694	0.000100842	toy
FBgn0038953	0.907979	0.0105501	0.00010436	CG18596
FBgn0038476	-0.861066	0.0105501	0.000104958	kuk
FBgn0027660	1.26487	0.0106397	0.000107039	blot
FBgn0038292	1.11267	0.0106609	0.000108444	CG3987
FBgn0050022	1.13546	0.0110669	0.000113811	CG30022
FBgn0041184	-0.852708	0.0111343	0.000115749	Socs36E
FBgn0267348	-0.649242	0.011601	0.000121897	LanB2
FBgn0034861	2.69073	0.0118381	0.000126092	CG9815
FBgn0037623	1.24613	0.0118381	0.000127035	CG9801
FBgn0035300	4.38247	0.0118654	0.000129227	CG1139
FBgn0011676	3.69249	0.0118654	0.000129981	Nos
FBgn0261113	0.772047	0.0122238	0.000135908	Xrp1
FBgn0038804	0.804768	0.0122238	0.00013664	CG10877
FBgn0027550	1.2191	0.0124775	0.000140871	CG6495
FBgn0038440	1.71069	0.0130657	0.000148972	Gr89a
FBgn0063492	1.74496	0.0130725	0.00015051	GstE8
FBgn0032629	3.24963	0.0132708	0.000154277	beat-IIIc
FBgn0037391	0.764505	0.0137378	0.000162219	CG2017
FBgn0038720	1.25262	0.0137378	0.000163744	CG6231
FBgn0038842	1.21027	0.0137378	0.000164469	hdly
FBgn0033889	0.540888	0.0137378	0.000166913	CG6701
FBgn0027280	0.520879	0.0137378	0.000167385	l(1)G0193
FBgn0264979	1.2512	0.013881	0.00017068	CG4267
FBgn0040056	-0.549597	0.0139288	0.000173402	CG17698
FBgn0051097	3.58668	0.0139288	0.000174383	CG31097
FBgn0033875	0.74656	0.0143877	0.000181735	CG6357
FBgn0051098	1.18676	0.0150421	0.000191683	CG31098
FBgn0004635	1.49334	0.0152385	0.000195915	rho
FBgn0037906	1.14137	0.0152385	0.000197593	PGRP-LB
FBgn0004892	0.948184	0.0154376	0.000205108	sob
FBgn0264815	3.20367	0.0154376	0.000205449	Pde1c
FBgn0086251	1.14509	0.0154376	0.000209782	del
FBgn0035806	1.32977	0.0154376	0.000209824	PGRP-SD
FBgn0039644	1.95821	0.0154376	0.000209975	CG11897
FBgn0040256	1.12888	0.0154376	0.000210529	Ugt86Dd
FBgn0038498	0.660626	0.0157249	0.000216204	beat-IIa
FBgn0036993	1.03511	0.015745	0.00021824	CG5910
FBgn0004893	-1.25025	0.0160528	0.000224302	bowl
FBgn0260482	2.86319	0.0160528	0.000226095	CG32599
FBgn0034950	2.04073	0.0161274	0.000228994	Pask
FBgn0038083	3.23723	0.0161274	0.000230752	CG5999
FBgn0039201	4.26519	0.0164245	0.000236839	CG13617
FBgn0000404	-0.555769	0.0167147	0.000245597	CycA
FBgn0030976	1.24534	0.0167147	0.000247757	CG7378
FBgn0013995	-0.842218	0.0167147	0.000248996	Calx
FBgn0031317	0.583182	0.0167147	0.000249118	CG5118
FBgn0037630	4.87216	0.0167147	0.000250365	Ir85a
FBgn0050456	0.827144	0.0169997	0.000256535	CG30456
FBgn0266581	-0.54261	0.0171198	0.00026026	pit
FBgn0052368	1.64143	0.0176302	0.000272735	CG32368
FBgn0019661	2.42371	0.0176302	0.000274875	roX1
FBgn0034396	2.46282	0.0176302	0.000275107	CG15097
FBgn0033453	0.549903	0.0176302	0.000275902	CG1667
FBgn0033226	0.512412	0.0179165	0.000282386	CG1882
FBgn0031417	0.658966	0.0181357	0.000287868	CG3597
FBgn0264006	4.54289	0.018177	0.000290556	dysc
FBgn0030796	4.22701	0.0181939	0.00029286	CG4829
FBgn0266417	-1.23616	0.0183032	0.000297794	CG45057
FBgn0012036	-0.612283	0.0183032	0.00030039	Aldh
FBgn0037563	3.53139	0.0183032	0.000300757	CG11672
FBgn0005612	0.669474	0.0189583	0.000313641	Sox14
FBgn0051248	1.21236	0.0194192	0.000323436	CG31248
FBgn0035287	-1.59434	0.0194595	0.000326282	CG13937
FBgn0010038	1.73406	0.0194757	0.000328732	GstD2
FBgn0040251	0.61955	0.0198402	0.000337101	Ugt86Di
FBgn0050484	1.88324	0.0202428	0.000346205	CG30484
FBgn0038473	-0.506879	0.020288	0.000349245	Ns1
FBgn0053494	4.20499	0.0202895	0.00035154	CG33494
FBgn0260768	1.38078	0.0205736	0.000359558	CG42566
FBgn0034756	2.09906	0.0205736	0.000362423	Cyp6d2
FBgn0035861	1.09162	0.0205736	0.000363361	CG7213
FBgn0026403	4.34008	0.0207355	0.000368538	Ndg
FBgn0023525	1.23335	0.0214294	0.000383267	CG3191
FBgn0034399	-0.912614	0.0214654	0.000386311	CG15083
FBgn0034156	1.4888	0.0215539	0.000390312	CG5348
FBgn0030309	-0.810104	0.0215542	0.000392727	CG1572
FBgn0033174	0.750723	0.0233339	0.000427763	CG11125
FBgn0032946	1.24358	0.0238402	0.000439709	nrv3
FBgn0016983	-0.405562	0.0243094	0.000451431	smid
FBgn0086898	1.61892	0.0243094	0.000453798	dgo
FBgn0004108	0.874033	0.0243945	0.000458113	Nrt
FBgn0030237	-1.14926	0.0244944	0.000462726	CG15209
FBgn0261989	4.43008	0.024509	0.000465743	CG42807
FBgn0265759	1.32317	0.0252659	0.000486815	CR44566
FBgn0002023	0.733633	0.0252659	0.000487773	Lim3
FBgn0051431	-0.986967	0.0252659	0.000488598	CG31431
FBgn0039282	4.29733	0.0267417	0.000520127	Bili
FBgn0034390	-0.74272	0.0269494	0.000529187	CG15093
FBgn0010105	-1.12661	0.0269494	0.000530192	comm
FBgn0033446	-0.503915	0.0269505	0.000533225	CG1648
FBgn0265510	3.75121	0.0273326	0.000543842	CR44372
FBgn0015039	1.07586	0.0280099	0.000560448	Cyp9b2
FBgn0000355	3.64789	0.0281337	0.00056607	Cp15
FBgn0040351	2.10259	0.0282254	0.000573379	CG11638
FBgn0034047	1.9927	0.0282254	0.000574226	CG12970
FBgn0051619	3.97128	0.0285875	0.00058664	CG31619
FBgn0035246	1.40215	0.0285875	0.000587992	CG13928
FBgn0038088	1.03555	0.0285875	0.000591179	CG10126
FBgn0011822	1.42667	0.0289591	0.000602277	pcl
FBgn0023416	0.93627	0.0289591	0.000606194	Ac3
FBgn0004364	-0.933808	0.0289591	0.000609354	18w
FBgn0039972	4.45561	0.0289591	0.000611812	CG17018
FBgn0052436	3.78645	0.029042	0.000616809	CG32436
FBgn0052582	2.88719	0.0290889	0.000621057	CR32582
FBgn0036126	0.769909	0.0294711	0.000632511	CG6272
FBgn0027580	-0.664478	0.0300246	0.000647746	CG1516
FBgn0034740	1.69892	0.0304808	0.000660996	nsr
FBgn0262970	0.607921	0.0305083	0.000665003	CR43281
FBgn0003996	-0.489756	0.0310292	0.000679826	w
FBgn0034638	1.43394	0.0318774	0.000701972	CG10433
FBgn0039674	-0.554361	0.0321729	0.000717398	CG1907
FBgn0039927	1.49159	0.0321729	0.000717942	CG11155
FBgn0010482	4.17911	0.0321729	0.00071927	l(2)01289
FBgn0036627	1.21136	0.033044	0.000742436	Grp
FBgn0260657	3.25145	0.0333872	0.000753881	CG42540
FBgn0042104	1.08142	0.0334475	0.000758982	CG18747
FBgn0267733	0.535875	0.0335206	0.000764781	CR46064
FBgn0030294	-0.841409	0.0335206	0.000768133	Pa1
FBgn0039183	-0.438669	0.0336621	0.000780827	Dis3
FBgn0266626	0.70712	0.0336621	0.000784806	CR45133
FBgn0039250	-0.947928	0.0336621	0.000786452	Mink
FBgn0003285	1.48405	0.0336621	0.000786627	rst
FBgn0024244	0.519993	0.0336621	0.00079019	drm
FBgn0026376	0.940396	0.0337459	0.000795929	Rgl
FBgn0003885	-0.519507	0.033908	0.000803542	alphaTub84D
FBgn0029128	1.34522	0.0339413	0.000810639	tyn
FBgn0024920	-1.05188	0.0339413	0.000811921	Ts
FBgn0015351	0.729654	0.0344025	0.000826799	CG14906
FBgn0037552	-0.697429	0.0353498	0.000853515	CG7800
FBgn0035948	2.23013	0.0359009	0.000870836	CG5644
FBgn0034507	2.00131	0.0359137	0.000875161	CG11192
FBgn0032665	-1.36897	0.0359567	0.000880228	CG15152
FBgn0000108	1.76634	0.0364301	0.00089713	Appl
FBgn0052677	3.36294	0.0364301	0.000901606	X11Lbeta
FBgn0033302	0.864414	0.0364301	0.000904033	Cyp6a14
FBgn0040348	0.956802	0.0368998	0.000921759	CG3703
FBgn0050502	0.919897	0.0368998	0.000925133	fa2h
FBgn0040232	-0.858045	0.0368998	0.000928063	cmet
FBgn0267727	-1.15087	0.0370657	0.000936379	Pen
FBgn0004646	1.74874	0.0376475	0.000955286	ogre
FBgn0026878	-1.06733	0.0387135	0.000987645	CG4325
FBgn0038330	1.20645	0.0387135	0.000990988	CG14868
FBgn0025815	-0.602466	0.038783	0.000997105	Mcm6
FBgn0263234	1.40505	0.0388616	0.00100347	Phae1
FBgn0001125	-0.545705	0.0389728	0.00101126	Got2
FBgn0003448	1.49685	0.0389728	0.00101505	sna
FBgn0010263	2.06791	0.039835	0.00104196	Rbp9
FBgn0015372	0.491218	0.0401356	0.00105431	RabX1
FBgn0024947	0.443298	0.0401578	0.00105938	NTPase
FBgn0086687	-0.47815	0.0409759	0.00108809	Desat1
FBgn0000405	-0.77753	0.0409759	0.00109029	CycB
FBgn0014073	2.12652	0.0409759	0.0010947	Tie
FBgn0261385	-0.467736	0.0412777	0.00110997	scra
FBgn0052407	0.560805	0.0412777	0.00111426	CG32407
FBgn0267160	1.22645	0.0412777	0.00111661	CR45600
FBgn0032897	1.80123	0.0418393	0.00113834	CG9336
FBgn0000015	3.75039	0.0418393	0.00114116	Abd-B
FBgn0262353	-0.523116	0.0419526	0.00114894	CR43051
FBgn0037549	-0.380723	0.0420623	0.00115664	CG7878
FBgn0033134	-0.607167	0.0421912	0.0011649	Tsp42El
FBgn0038475	0.766216	0.0422726	0.00117187	Keap1
FBgn0038014	1.79845	0.0423266	0.00118171	CG10041
FBgn0030993	0.596332	0.0423266	0.00118284	Mec2
FBgn0029838	1.35599	0.0425356	0.00119343	CG4666
FBgn0031968	-0.594252	0.0429192	0.00121005	CG7231
FBgn0039266	-0.399573	0.0429192	0.00121379	CG11791
FBgn0058160	-0.890848	0.0431116	0.00122405	CG40160
FBgn0034694	0.532965	0.0432869	0.00123387	CG6613
FBgn0032050	-0.467587	0.0433318	0.00124203	CG13096
FBgn0040493	-0.502158	0.0433318	0.00124483	grsm
FBgn0033177	0.477189	0.0434609	0.0012534	CG11141
FBgn0028427	-0.446153	0.043667	0.00126893	Ilk
FBgn0003390	0.571553	0.043667	0.00126911	shf
FBgn0085434	-0.525274	0.0439844	0.00128325	NaCP60E
FBgn0003502	0.764366	0.0442756	0.00129799	Btk29A
FBgn0025630	0.526339	0.0442756	0.00130164	CG4061
FBgn0031418	0.406363	0.0445718	0.00131533	CG3609
FBgn0027932	-0.582194	0.0445763	0.00132045	Akap200
FBgn0011648	-0.464088	0.0449561	0.00133672	Mad
FBgn0035876	0.534062	0.0449864	0.0013456	Pex2
FBgn0261873	1.18408	0.0449864	0.00134768	sdt
FBgn0250876	-0.889413	0.0454057	0.00136532	Sema-5c
FBgn0030529	-0.434205	0.046006	0.00139152	Clic
FBgn0035499	-0.467788	0.046006	0.00139365	Chd64
FBgn0034403	2.21279	0.0461835	0.00140419	CG18190
FBgn0033945	1.17998	0.0463343	0.00141788	CG12868
FBgn0038964	-0.495896	0.0463343	0.00141914	Nop56
FBgn0262580	1.58307	0.0463963	0.00143038	CG43120
FBgn0030720	-0.422761	0.0463963	0.0014326	CG8939
FBgn0052103	0.49574	0.0463963	0.00144065	CG32103
FBgn0035057	2.00699	0.0463963	0.00145014	CG3880
FBgn0004118	3.15345	0.0463963	0.0014513	nAChRbeta2
FBgn0027601	1.05083	0.0463963	0.00145698	pdgy
FBgn0037560	2.51216	0.0463963	0.00145734	CR18228
FBgn0264745	1.85039	0.0480507	0.00151468	CR44003
FBgn0031461	2.22792	0.0480738	0.00152078	daw
FBgn0045064	1.23436	0.0488841	0.00155208	bwa
FBgn0014343	1.33603	0.0488841	0.00155945	mirr
FBgn0010397	-0.515268	0.0488841	0.00156281	LamC
FBgn0051875	1.13842	0.0492646	0.00158387	CG31875
FBgn0262509	3.07086	0.0492646	0.00159457	nrm
FBgn0026593	0.636834	0.0492646	0.00159548	CG5707
FBgn0029526	0.785602	0.0492646	0.001597	CR18166
FBgn0039525	2.50033	0.0493084	0.00160393	CG5646
FBgn0263415	2.76998	0.0493335	0.00161026	CR43461
FBgn0032264	1.58905	0.0498654	0.00163678	Lip4
FBgn0032929	-1.50994	0.0498654	0.00164156	Mcm10
FBgn0015801	0.742863	0.0498654	0.00164434	Reg-5
FBgn0037850	1.89935	0.0500781	0.00166013	CG14695
FBgn0023129	-0.861997	0.0500781	0.00166255	aay
FBgn0036306	-0.837292	0.0508039	0.00169233	CG10973
FBgn0040609	1.16501	0.051231	0.00171228	CG3348
FBgn0037911	0.625425	0.0516002	0.00173382	CG10898
FBgn0263607	0.769343	0.0516002	0.00174138	l(3)72Dp
FBgn0029722	3.32716	0.0516002	0.00174193	CG7024
FBgn0260795	2.94191	0.052895	0.00179155	CG42575
FBgn0033132	-0.667877	0.0537288	0.00184449	Tsp42Ej
FBgn0259214	-0.440633	0.0537288	0.00185325	PMCA
FBgn0050272	3.5697	0.0537288	0.00185818	CG30272
FBgn0037130	1.16522	0.0537288	0.00186799	Syn1
FBgn0037622	0.636521	0.0537288	0.00187566	CG8202
FBgn0036485	0.843647	0.0537288	0.00187692	FucTA
FBgn0263397	-0.497942	0.0537288	0.00188012	Ih
FBgn0034437	2.68499	0.0537288	0.00188497	CG10051
FBgn0033458	1.52571	0.0537288	0.00188697	CG18446
FBgn0053207	-1.00787	0.0537288	0.00188803	pxb
FBgn0259740	-0.605269	0.0537288	0.00188987	CG42394
FBgn0032105	-0.900149	0.0537288	0.00189186	borr
FBgn0003268	-0.573485	0.0538835	0.00190333	rod
FBgn0031745	-0.836557	0.0539814	0.00191282	rau
FBgn0032517	0.441991	0.0545617	0.00193948	CG7099
FBgn0004629	0.677296	0.0547468	0.00195307	Cys
FBgn0025835	1.39334	0.0547468	0.0019583	CG17707
FBgn0038621	2.14697	0.0552382	0.00198205	CG10864
FBgn0085400	1.67662	0.0557251	0.00200575	CG34371
FBgn0010786	0.575351	0.0562787	0.00203271	l(3)02640
FBgn0263655	1.96709	0.0562787	0.00203826	CG43646
FBgn0025682	0.642521	0.0566307	0.00205734	scf
FBgn0034317	3.43349	0.0572849	0.00208896	CG14499
FBgn0029672	-0.520346	0.0572849	0.00209391	CG2875
FBgn0004055	0.876002	0.0576428	0.00211344	uzip
FBgn0264975	-0.647146	0.0600623	0.00220886	Nrg
FBgn0041629	0.868632	0.0602806	0.00222754	Hexo2
FBgn0037742	1.79325	0.0602806	0.00223037	Rpt3R
FBgn0037562	1.25636	0.0603327	0.00224284	CG11671
FBgn0035880	1.41065	0.0603327	0.00225246	CG17352
FBgn0028740	3.06172	0.0603327	0.00225253	CG6362
FBgn0267073	0.83154	0.0604338	0.00226306	CR45517
FBgn0031571	3.22237	0.0609949	0.00230053	CG3921
FBgn0025456	1.11527	0.0609949	0.00231546	CREG
FBgn0262007	3.03273	0.0609949	0.00231743	CG42825
FBgn0028481	3.06579	0.0609949	0.00231812	CG4341
FBgn0031630	-2.35477	0.0609949	0.00231816	CG15629
FBgn0034291	3.04103	0.0617041	0.00235356	CG5770
FBgn0033978	0.569109	0.0617041	0.00235891	Cyp6a23
FBgn0034496	-0.494934	0.061978	0.00237631	CG9143
FBgn0032075	1.09499	0.0625451	0.00241193	Tsp29Fb
FBgn0026197	1.29049	0.0625451	0.00241483	noe
FBgn0030654	0.617758	0.0625451	0.00241903	CG15643
FBgn0029708	3.3069	0.0629004	0.00244192	CG3556
FBgn0046225	0.535388	0.0629004	0.00244917	CG17230
FBgn0052053	0.844	0.0629004	0.00245926	CG32053
FBgn0032200	-0.603531	0.0629004	0.00246089	CG5676
FBgn0267033	0.646145	0.0629722	0.00247537	mamo
FBgn0259878	0.808489	0.0629722	0.0024787	Fs
FBgn0027341	0.801213	0.0629722	0.00248482	Gfat1
FBgn0053926	3.26472	0.0637467	0.0025225	CG33926
FBgn0004859	-3.7458	0.063881	0.00254242	ci
FBgn0267252	3.74839	0.063881	0.00254608	Ggamma30A
FBgn0053126	0.851996	0.063881	0.00254924	NLaz
FBgn0032242	-0.391742	0.0647364	0.00259061	CG5355
FBgn0267531	-0.826443	0.0650184	0.00261015	CR45871
FBgn0267766	-0.95845	0.0650184	0.00261643	CR46097
FBgn0027836	0.409537	0.0652378	0.00263256	Dgp-1
FBgn0029608	1.94704	0.065698	0.00265847	CG3091
FBgn0026418	-0.446542	0.065948	0.00267596	Hsc70Cb
FBgn0038344	0.666444	0.0670367	0.00273583	CG5205
FBgn0267776	3.33969	0.0670367	0.00274807	CR46107
FBgn0250906	-0.347618	0.0670367	0.00274852	Pgk
FBgn0038065	-0.385499	0.0670367	0.00275011	Snx3
FBgn0259682	-0.580751	0.0671775	0.00277673	Jabba
FBgn0033438	2.25254	0.0671775	0.00277732	Mmp2
FBgn0030506	0.675189	0.0671775	0.00277841	Lig4
FBgn0013750	-0.395705	0.0672172	0.00278787	Arf51F
FBgn0031037	-0.441603	0.0672172	0.00280216	CG14207
FBgn0031476	1.79759	0.0672172	0.00280259	CG8813
FBgn0003204	-0.355947	0.0674147	0.00281837	ras
FBgn0029969	-0.519811	0.0681568	0.00285701	CG10932
FBgn0015286	-0.413984	0.0688835	0.00290742	Rala
FBgn0039711	0.521815	0.0688835	0.00291291	CG7824
FBgn0082585	1.68352	0.0688835	0.00292834	sprt
FBgn0036362	4.54542	0.0688835	0.00292949	CG10725
FBgn0025680	-0.469386	0.0688835	0.00293245	cry
FBgn0003360	-0.458859	0.0688835	0.00293367	sesB
FBgn0038679	-0.612905	0.068936	0.00294361	CG6040
FBgn0026315	0.398862	0.0690484	0.00295613	Ugt35a
FBgn0043364	-0.651842	0.0705572	0.00302861	cbt
FBgn0039321	1.51649	0.0707292	0.0030439	CG10550
FBgn0039325	3.23	0.0711574	0.00307028	CG10560
FBgn0024754	-0.372785	0.0712996	0.00308439	Flo1
FBgn0029859	1.65279	0.0713534	0.00310151	CG15892
FBgn0019662	0.472885	0.0713534	0.00310267	qm
FBgn0033485	-0.414731	0.0716516	0.00313028	RpLP0-like
FBgn0264273	0.717831	0.0716516	0.00313239	Sema-2b
FBgn0024183	-0.408022	0.0716516	0.003147	vig
FBgn0261802	-0.612947	0.0716516	0.00314767	CG42748
FBgn0030994	1.17801	0.0716872	0.00315725	HP1D3csd
FBgn0052647	2.74034	0.0717029	0.00316596	CG32647
FBgn0261808	0.523968	0.0717239	0.0031749	cu
FBgn0037521	3.29676	0.0718685	0.00319001	CG2993
FBgn0052537	0.521936	0.0718685	0.00320858	CG32537
FBgn0035557	0.766636	0.0718685	0.00323418	CG11353
FBgn0041627	1.18574	0.0718685	0.00323932	Ku80
FBgn0034310	-0.51319	0.0718685	0.00323935	Nup75
FBgn0051637	0.461308	0.0718685	0.00324445	CG31637
FBgn0027602	-0.508664	0.0718685	0.00324536	CG8611
FBgn0036287	0.608455	0.0718685	0.00324557	CG10663
FBgn0263980	3.33545	0.0727398	0.00329305	CG43729
FBgn0038145	-0.33528	0.0732189	0.00332441	Droj2
FBgn0005586	2.06992	0.0732189	0.00333111	Rab3
FBgn0010435	1.34583	0.0738854	0.00336969	emp
FBgn0028744	-0.349073	0.075119	0.00343435	CG5033
FBgn0000210	1.31181	0.0752427	0.00344939	br
FBgn0035812	0.389219	0.0752427	0.00345683	CG7457
FBgn0035087	-0.636158	0.0756213	0.00348267	CG2765
FBgn0031306	2.73564	0.0756864	0.00349867	CG4577
FBgn0036240	0.473994	0.0756864	0.00350259	CG6928
FBgn0037473	0.475366	0.0757141	0.00351234	CG10068
FBgn0032889	0.360917	0.0757699	0.00352339	CG9331
FBgn0038042	1.46463	0.0758151	0.00353397	Scgbeta
FBgn0035094	1.10925	0.076385	0.00358118	CG9380
FBgn0031711	-0.503435	0.076385	0.00359978	CG6907
FBgn0034724	-0.504945	0.076385	0.00359985	babos
FBgn0028670	-0.475157	0.076385	0.00360612	Vha100-2
FBgn0041225	1.17297	0.076385	0.00361061	Gr94a
FBgn0260995	1.21169	0.076385	0.00361681	CG42596
FBgn0013278	0.950088	0.076385	0.00362031	Hsp70Bb
FBgn0058263	-0.471151	0.0764237	0.00363514	MFS17
FBgn0030887	3.17392	0.0764237	0.00363922	CG6867
FBgn0038530	3.02854	0.0764593	0.003652	AttD
FBgn0035907	-0.845026	0.0764593	0.00365801	GstO1
FBgn0003068	-0.442371	0.0767138	0.00367876	per
FBgn0050035	0.657305	0.0767739	0.00369103	Tret1-1
FBgn0039877	-0.479256	0.0767739	0.00369881	CG2118
FBgn0016013	1.40599	0.0774157	0.00373838	Faa
FBgn0038608	-1.04885	0.0776966	0.00376064	WRNexo
FBgn0262562	2.43629	0.0781282	0.00379026	CG43102
FBgn0031261	0.917809	0.0784343	0.0038244	nAChRbeta3
FBgn0004865	-1.5117	0.0784343	0.00383064	Eip78C
FBgn0028331	0.672077	0.0784343	0.00383499	l(1)G0289
FBgn0033799	1.19253	0.0784343	0.00384018	GLaz
FBgn0015577	-0.423406	0.0792727	0.00389076	alpha-Est9
FBgn0034971	-0.342579	0.0792727	0.00389895	CG3209
FBgn0033631	0.92106	0.0794908	0.00391856	Sod3
FBgn0028479	-0.39379	0.0795716	0.00393144	Mtpalpha
FBgn0260477	-0.81331	0.0801638	0.00396966	CG30283
FBgn0000579	-0.417376	0.0801775	0.00399082	Eno
FBgn0052745	2.09891	0.0801775	0.00399632	CR32745
FBgn0038975	1.94472	0.0801775	0.00399723	Nrx-1
FBgn0267486	1.1869	0.0807099	0.00403279	Ptp36E
FBgn0264679	-0.65677	0.0809462	0.00407385	CR43964
FBgn0023511	0.402069	0.0809462	0.00407744	Edem1
FBgn0040294	0.417931	0.0809462	0.00408046	POSH
FBgn0030511	-0.577163	0.0809462	0.00408079	CG11158
FBgn0030876	0.489184	0.08177	0.00413146	CG6762
FBgn0014141	-0.723828	0.0819013	0.00414725	cher
FBgn0002901	0.777987	0.0820146	0.00416694	mus304
FBgn0263133	-0.702978	0.0820146	0.00417132	ico
FBgn0051674	0.656418	0.0827036	0.00421561	CG31674
FBgn0023542	-0.42005	0.0837034	0.0042823	Nmd3
FBgn0024234	-0.420189	0.0837034	0.00429502	gbb
FBgn0010452	-0.418059	0.0837034	0.00430856	trn
FBgn0034797	1.05657	0.0837034	0.00430928	nahoda
FBgn0260745	-1.73979	0.0837034	0.00431336	mfas
FBgn0034271	0.466977	0.0837162	0.00432514	CG4996
FBgn0033644	0.915673	0.0837162	0.00433603	Tret1-2
FBgn0037138	0.652006	0.0837162	0.00434209	P5CDh1
FBgn0263316	0.751761	0.0837362	0.00435249	Mrp4
FBgn0053113	-0.363603	0.0838974	0.00437134	Rtnl1
FBgn0029664	0.503591	0.0838974	0.00439546	CG10802
FBgn0014033	0.828787	0.0838974	0.00440851	Sr-CI
FBgn0053138	-0.466431	0.0838974	0.00441688	AGBE
FBgn0031974	-0.548643	0.0838974	0.00441688	CG12560
FBgn0032602	3.78731	0.0838974	0.00441713	ppk17
FBgn0039225	-1.00797	0.0841461	0.00444887	Ets96B
FBgn0039277	1.82507	0.0841461	0.00444904	CG13650
FBgn0031652	0.566075	0.0846763	0.00448654	jet
FBgn0261270	-0.780039	0.0852055	0.0045241	SelD
FBgn0038680	1.40847	0.085699	0.00456005	Cyp12a5
FBgn0020633	-0.692848	0.085699	0.00456946	Mcm7
FBgn0003071	-0.432998	0.0861189	0.00460153	Pfk
FBgn0039025	-0.495119	0.0861189	0.00461988	Usp12-46
FBgn0087007	0.852737	0.0861189	0.00462073	bbg
FBgn0263079	0.983623	0.0866861	0.00466086	CG43338
FBgn0051451	2.65359	0.0867181	0.00467227	CR31451
FBgn0035756	2.53699	0.0876441	0.00473196	unc-13-4A
FBgn0010549	1.11578	0.0884355	0.00478457	l(2)03659
FBgn0044872	1.82964	0.0884898	0.00480165	FucTC
FBgn0027338	-0.334496	0.0884898	0.0048165	Kap-alpha3
FBgn0034070	2.52997	0.0884898	0.00481719	SP2353
FBgn0039909	-0.430504	0.0890447	0.00485735	CG1970
FBgn0032670	-0.892902	0.08936	0.00488453	CG5783
FBgn0037016	-0.367076	0.0896102	0.00490822	CG13252
FBgn0034224	3.04406	0.0896738	0.00492174	insb
FBgn0263855	-0.454461	0.0902102	0.00496126	BubR1
FBgn0027330	-0.372711	0.0902313	0.0049725	l(1)G0020
FBgn0033989	-0.45792	0.0906704	0.00500684	CG7639
FBgn0265003	-0.482311	0.0909003	0.00502969	koi
FBgn0040918	-0.356528	0.0913922	0.00506713	schlank
FBgn0039993	-0.497199	0.0916704	0.00509688	CG17691
FBgn0038128	0.568438	0.0916704	0.00510305	Ravus
FBgn0032679	-0.315378	0.0917106	0.00513109	bsf
FBgn0010504	0.327695	0.0917106	0.00513946	kermit
FBgn0026409	-0.470711	0.0917106	0.00514063	Mpcp
FBgn0266124	-0.498904	0.0917106	0.00514629	ghi
FBgn0029588	0.726118	0.0922804	0.00519271	CG14798
FBgn0031971	0.716745	0.0922804	0.0051989	Sirup
FBgn0086348	0.714845	0.092359	0.00521751	se
FBgn0037082	0.567059	0.092359	0.00522458	CG5664
FBgn0037506	-1.27154	0.092359	0.00523429	CG1287
FBgn0264907	1.20425	0.0929647	0.00527901	CG44098
FBgn0052027	0.940226	0.0933815	0.00531312	CR32027
FBgn0015623	0.476488	0.0935025	0.00533082	Cpr
FBgn0266708	2.61763	0.0935025	0.00534091	Cep89
FBgn0015924	-0.445806	0.0936498	0.00535979	crq
FBgn0043903	-0.437626	0.0936686	0.00538043	dome
FBgn0024238	-0.417407	0.0936686	0.00538181	Fim
FBgn0032891	1.39976	0.0938382	0.00541572	Oseg5
FBgn0010407	1.26083	0.0938382	0.00542263	Ror
FBgn0030638	0.922559	0.0938382	0.00542302	CG11655
FBgn0002924	-0.445946	0.0939398	0.00543939	ncd
FBgn0040682	2.84823	0.0941096	0.00545975	CG14664
FBgn0024556	-0.464049	0.0946743	0.00550309	EfTuM
FBgn0030314	0.375476	0.0950792	0.00553725	CG11696
FBgn0004595	1.23702	0.0951723	0.00556129	pros
FBgn0022359	1.87855	0.0951723	0.00556918	Sodh-2
FBgn0015903	-0.544451	0.0951723	0.00557459	apt
FBgn0035523	-0.428238	0.0954572	0.00560195	CG1311
FBgn0031534	-0.402258	0.095565	0.00561896	Snx1
FBgn0036419	0.852198	0.0955794	0.00564798	CG13482
FBgn0262149	0.958542	0.0955794	0.00564809	CR42875
FBgn0032482	-0.385963	0.0955794	0.00565185	Pect
FBgn0003074	-0.351637	0.096005	0.00569572	Pgi
FBgn0259923	-0.415415	0.096005	0.00570381	2020-09-04
FBgn0037153	2.05653	0.096005	0.00570921	olf413
FBgn0035644	-1.17379	0.096078	0.00572861	DNApol-epsilon58
FBgn0037000	1.81483	0.096078	0.00573504	ZnT77C
FBgn0033303	-0.620833	0.0966206	0.00577823	Cyp6a15Psi
FBgn0003257	-0.482198	0.0971157	0.00581869	r-l
FBgn0266064	0.706458	0.0983983	0.00590654	GlyS
FBgn0052626	-0.336089	0.098481	0.00592251	AMPdeam
FBgn0033519	0.943955	0.0993963	0.00599193	CG11825
FBgn0002780	-0.470069	0.0993963	0.00599978	mod
FBgn0039900	1.42615	0.0996378	0.00602549	Syt7
FBgn0262357	2.99402	0.0999915	0.00605994	CG43055
FBgn0027108	0.922371	0.0999915	0.00606923	Inx2
FBgn0260388	-0.837402	0.100107	0.00608744	CG42514
FBgn0036316	-0.591719	0.100178	0.00610295	CG10960
FBgn0266346	1.00387	0.100447	0.00615592	CngB
FBgn0052054	3.16151	0.100447	0.00617322	CG32054
FBgn0036624	-0.348525	0.100447	0.00617904	RAF2
FBgn0040398	0.504284	0.100447	0.00618068	CG14629
FBgn0038597	-0.316099	0.100447	0.00618379	CG8064
FBgn0036320	1.17027	0.100447	0.00619438	CG10943
FBgn0003731	-0.471297	0.100447	0.00620879	Egfr
FBgn0004569	-0.635943	0.100447	0.00621164	aos
FBgn0265345	1.26158	0.100447	0.00623052	CR44299
FBgn0014869	-0.346691	0.100447	0.00623163	Pglym78
FBgn0004431	2.86793	0.102079	0.00634429	LysX
FBgn0034670	-0.455254	0.102276	0.00636795	CG13488
FBgn0040805	1.16003	0.102771	0.00641459	CG12355
FBgn0266441	-0.870996	0.102771	0.00642174	CG45071
FBgn0028394	0.521672	0.102904	0.00644159	CG17834
FBgn0042103	1.03286	0.102953	0.00646727	CG18746
FBgn0264449	0.813343	0.102953	0.00646844	CG43867
FBgn0261439	-0.306808	0.102953	0.00648136	SdhA
FBgn0266521	2.3045	0.102953	0.00649068	stai
FBgn0037680	-0.53765	0.103259	0.0065215	CG8121
FBgn0039645	3.09923	0.103405	0.00654982	CG11898
FBgn0264821	-0.807049	0.103405	0.00655771	CR44029
FBgn0266687	-2.12138	0.103405	0.00656584	CR45177
FBgn0024804	-0.399655	0.103405	0.00659371	Dbp80
FBgn0052669	-0.895089	0.103405	0.00659718	CG32669
FBgn0030300	-0.585937	0.103405	0.00660006	Sk1
FBgn0264713	0.566462	0.103416	0.00661235	CR43981
FBgn0038465	2.2994	0.103487	0.00662847	Irc
FBgn0010770	-0.36933	0.103508	0.00664136	ppan
FBgn0028341	-0.518141	0.103749	0.00666839	l(1)G0232
FBgn0010014	2.02752	0.104444	0.00672479	CanB
FBgn0010473	2.86564	0.105149	0.00678194	tutl
FBgn0004133	0.756993	0.105322	0.00680731	blow
FBgn0034145	3.25401	0.105322	0.00681728	CG5065
FBgn0035811	0.373752	0.105322	0.00682837	CG12262
FBgn0015789	-0.281237	0.105636	0.00686055	Rab10
FBgn0037073	-0.317322	0.106178	0.0069076	CG7338
FBgn0261611	2.71291	0.106202	0.00692107	CG42700
FBgn0016930	-0.493945	0.107182	0.0069969	Dyrk2
FBgn0083068	0.635405	0.107257	0.00701382	CG33947
FBgn0039075	1.61347	0.107784	0.00706033	CG4393
FBgn0039296	1.22701	0.107799	0.00707333	CG10420
FBgn0030847	0.755876	0.108103	0.00710535	CG12991
FBgn0026562	1.33134	0.108433	0.00713918	BM-40-SPARC
FBgn0019952	0.435002	0.10858	0.00718051	Orct
FBgn0032428	1.76267	0.10858	0.00718484	CG6405
FBgn0013972	3.27467	0.10858	0.00718598	Gycalpha99B
FBgn0039464	0.703101	0.10858	0.0071974	CG6330
FBgn0011211	-0.348757	0.109092	0.00725535	blw
FBgn0040395	0.341645	0.109092	0.00725571	Unc-76
FBgn0052373	1.37283	0.109235	0.00727745	CG32373
FBgn0034072	-0.441953	0.109604	0.00731431	Dg
FBgn0052528	-0.3361	0.109741	0.00737602	parvin
FBgn0033059	-0.415643	0.109741	0.00739838	CG7845
FBgn0033501	-2.97672	0.109741	0.00740449	CG12911
FBgn0030509	1.67334	0.109741	0.00741466	CG11162
FBgn0015664	-0.442566	0.109741	0.0074177	Dref
FBgn0040227	-0.316083	0.109741	0.00742142	eIF-3p66
FBgn0042094	-0.48847	0.109741	0.00742239	Adk3
FBgn0034391	3.02092	0.109741	0.00743536	CG15080
FBgn0053087	0.762047	0.109741	0.00744819	LRP1
FBgn0265182	1.23402	0.109741	0.00745037	CG44247
FBgn0015546	-0.367954	0.109741	0.00747301	spel1
FBgn0034137	1.32908	0.109741	0.00748251	CG4945
FBgn0011606	-0.661701	0.109741	0.00748291	Klp3A
FBgn0263239	1.00505	0.109785	0.00750282	dar1
FBgn0264748	1.15509	0.109785	0.00751043	CG44006
FBgn0263656	2.24352	0.10999	0.00753674	CG43647
FBgn0015714	0.736218	0.110352	0.00757392	Cyp6a17
FBgn0036397	0.648901	0.110419	0.00759084	CG8783
FBgn0260655	0.519864	0.110754	0.00762626	l(3)76BDm
FBgn0034786	0.549702	0.110897	0.00764848	CG13531
FBgn0265699	2.5996	0.110973	0.00766983	CR44506
FBgn0051548	-0.61783	0.110973	0.00767857	CG31548
FBgn0038803	0.937796	0.111271	0.00771158	CG5191
FBgn0021995	-0.378212	0.111417	0.0077342	Rs1
FBgn0000083	-0.305522	0.111614	0.00776036	AnxB9
FBgn0024352	-0.484411	0.111644	0.00777493	Hop
FBgn0001942	-0.416681	0.111826	0.00780009	eIF-4a
FBgn0000140	-0.658189	0.112488	0.00785885	asp
FBgn0037709	-0.366833	0.112794	0.00789279	CG8199
FBgn0263235	1.34249	0.112909	0.00791348	Phae2
FBgn0030482	1.27683	0.113425	0.00796231	CG1673
FBgn0000043	-0.623134	0.113592	0.0079898	Act42A
FBgn0033997	1.10037	0.113592	0.00799945	Ir51a
FBgn0031182	0.62514	0.114265	0.00805959	Cyp6t1
FBgn0003495	1.27756	0.114324	0.00807654	spz
FBgn0038951	0.364973	0.114607	0.0081232	CG5380
FBgn0034087	-0.374663	0.114607	0.00812474	clu
FBgn0003016	-0.603878	0.114607	0.00814577	osp
FBgn0027780	0.440763	0.114607	0.00815536	U26
FBgn0264087	1.2316	0.114607	0.00816061	Slob
FBgn0019643	0.462773	0.114651	0.00818505	Dat
FBgn0264542	0.958775	0.114651	0.00818937	CG43921
FBgn0014861	-0.556685	0.115467	0.00826057	Mcm2
FBgn0038536	-0.626638	0.115481	0.00827449	CG7655
FBgn0010100	-0.356143	0.116168	0.00833667	Acon
FBgn0051324	0.745044	0.116791	0.00840247	CG31324
FBgn0030692	-0.341143	0.116791	0.00840751	mRpS30
FBgn0267041	1.03408	0.117909	0.00850112	CR45485
FBgn0263780	-2.03614	0.118373	0.00855561	CG17684
FBgn0052040	1.1118	0.118373	0.00856472	CG32040
FBgn0036772	-0.781581	0.118373	0.00857427	CG5290
FBgn0032336	1.78286	0.118671	0.00861395	AstC
FBgn0037071	0.536571	0.118671	0.00862242	CG7632
FBgn0036165	-0.479641	0.11924	0.00868853	chrb
FBgn0020238	-0.37007	0.11924	0.00869039	14-3-3epsilon
FBgn0032961	-0.429498	0.120081	0.00876515	CG1416
FBgn0051301	-0.303317	0.120108	0.00878054	CG31301
FBgn0035132	-0.366806	0.12108	0.00886514	mthl10
FBgn0030028	1.36506	0.12242	0.00898866	Corp
FBgn0002571	1.59345	0.12242	0.00899062	Mal-A3
FBgn0038721	1.40902	0.122834	0.00903474	subdued
FBgn0000064	-0.287815	0.123537	0.00910029	Ald
FBgn0035078	1.58145	0.12364	0.00912165	Tpc2
FBgn0033224	-0.299615	0.124366	0.00919929	Nop17l
FBgn0004390	-0.498293	0.124366	0.0092098	RasGAP1
FBgn0031498	0.678513	0.124366	0.00921693	CG17260
FBgn0031114	0.469732	0.124918	0.0092718	cactin
FBgn0015600	0.843008	0.125209	0.00930739	toc
FBgn0051373	-0.822877	0.125983	0.00937905	CG31373
FBgn0038487	2.07577	0.126913	0.00948062	TwdlW
FBgn0004598	-0.488851	0.126913	0.00949418	Fur2
FBgn0038453	-0.394599	0.126913	0.00949638	CG10326
FBgn0046687	0.320804	0.126913	0.00952165	Tre1
FBgn0005592	0.881131	0.126913	0.00952391	btl
FBgn0050486	1.18754	0.126913	0.00953337	CG30486
FBgn0036147	0.598413	0.12718	0.00956763	Plod
FBgn0259927	1.12527	0.127239	0.0096024	CG42450
FBgn0034184	0.375712	0.127239	0.0096145	CG9646
FBgn0032955	-0.300406	0.127239	0.00962938	CG2201
FBgn0038404	1.12893	0.127239	0.0096548	CG8925
FBgn0030000	-0.347693	0.127239	0.00965483	CG2260
FBgn0040010	-0.443232	0.127239	0.00965745	CG17493
FBgn0039154	1.56478	0.127251	0.00967555	Npc2f
FBgn0036547	2.29363	0.127251	0.00968677	CG17032
FBgn0038725	1.76939	0.129892	0.00990231	CG6184
FBgn0261575	1.67662	0.130464	0.0099605	tobi
FBgn0039467	-0.319402	0.13048	0.00997633	CG14253
FBgn0265186	0.37784	0.130995	0.0100304	CG44251
FBgn0028863	3.40978	0.131332	0.0100911	CG4587
FBgn0004242	1.80114	0.131332	0.0100969	Syt1
FBgn0039827	1.32243	0.131332	0.0101187	CG1544
FBgn0033717	-0.31724	0.131332	0.0101203	CG8839
FBgn0264904	0.460952	0.131332	0.0101528	CR44095
FBgn0001233	-0.602493	0.131332	0.0101569	Hsp83
FBgn0024734	-0.279577	0.131332	0.010165	PRL-1
FBgn0032051	-0.378664	0.131332	0.0101736	CG13097
FBgn0038989	-0.435523	0.131609	0.0102098	CG6937
FBgn0015001	0.948704	0.131638	0.0102267	iotaTry
FBgn0035439	1.05004	0.131897	0.0102616	CG14961
FBgn0032782	-0.44166	0.131934	0.0102793	Rab9
FBgn0029843	1.04422	0.13201	0.0103024	Nep1
FBgn0038326	-0.344957	0.13201	0.0103146	CG5044
FBgn0031912	-0.332746	0.132228	0.0103464	CG5261
FBgn0266452	-0.384167	0.132487	0.0103816	CTPsyn
FBgn0030246	0.529864	0.132714	0.0104142	CG1582
FBgn0051547	1.91572	0.132968	0.010449	CG31547
FBgn0267552	0.47995	0.133552	0.0105098	CR45892
FBgn0010222	0.397441	0.133647	0.0105322	Nmdmc
FBgn0034965	0.845931	0.133828	0.0105614	ppk29
FBgn0264855	-0.394912	0.134041	0.0105932	AP-2alpha
FBgn0033204	-0.573111	0.134314	0.0106298	CG2065
FBgn0266758	3.0644	0.135285	0.0107218	Esyt2
FBgn0038109	1.11879	0.135345	0.0107505	CG11656
FBgn0265612	0.828529	0.135345	0.0107592	CR44430
FBgn0036857	0.742281	0.135345	0.0107775	CG9629
FBgn0034282	-0.281407	0.135345	0.010787	Mapmodulin
FBgn0034312	0.376121	0.135956	0.0108601	CG10916
FBgn0032298	-0.426528	0.135956	0.01089	CG6724
FBgn0039003	0.431211	0.135956	0.010896	wfs1
FBgn0017566	-0.341023	0.135956	0.0109067	ND75
FBgn0023537	-0.350259	0.135956	0.0109117	CG17896
FBgn0029924	-1.51624	0.136637	0.0109817	CG4586
FBgn0262560	-0.540548	0.138598	0.0111673	wcd
FBgn0030241	-0.771486	0.138598	0.0111932	feo
FBgn0026144	1.46123	0.138598	0.0111976	CBP
FBgn0051092	0.547054	0.138598	0.0112066	LpR2
FBgn0004378	-0.539277	0.138598	0.0112168	Klp61F
FBgn0035166	0.35776	0.139142	0.0112764	CG13902
FBgn0262559	-0.383253	0.139287	0.0113036	Mdh2
FBgn0036663	-0.486538	0.139621	0.0113463	CG9674
FBgn0052091	0.463285	0.14056	0.0114384	CG32091
FBgn0083940	0.771535	0.141409	0.0115232	RhoU
FBgn0034420	-0.525074	0.141833	0.0115737	CG10737
FBgn0030484	-0.842461	0.142171	0.0116172	GstT4
FBgn0262951	2.23024	0.143433	0.0117363	CR43270
FBgn0040299	0.364605	0.143594	0.0117655	Myo28B1
FBgn0037270	-0.364204	0.143608	0.0117828	CG9769
FBgn0266431	-0.981434	0.14367	0.0118039	CG45061
FBgn0019925	-0.387742	0.144425	0.0118821	Surf4
FBgn0038290	2.16271	0.144538	0.01192	CG6912
FBgn0030085	1.14773	0.144538	0.0119309	CG6999
FBgn0033294	2.19509	0.144538	0.0119398	Mal-A4
FBgn0262719	1.65827	0.144991	0.0120002	CG43163
FBgn0261573	-0.343264	0.144991	0.0120181	CoRest
FBgn0019960	-0.374836	0.144991	0.0120258	CG6455
FBgn0038353	0.834683	0.145331	0.0120703	CG5399
FBgn0031449	-0.395432	0.145436	0.0121054	CG31689
FBgn0032409	-0.442144	0.145436	0.0121145	Ced-12
FBgn0033538	-0.540162	0.145436	0.0121278	CG11883
FBgn0011824	-0.504901	0.145687	0.0121652	CG4038
FBgn0029105	2.59119	0.145687	0.0121813	alpha-catenin-related
FBgn0040551	0.761247	0.146419	0.0122617	CG11686
FBgn0265081	2.14836	0.146419	0.0122752	CR44192
FBgn0010217	-0.368383	0.14654	0.0123017	ATPsyn-beta
FBgn0052512	-0.750051	0.146859	0.012345	CG32512
FBgn0037891	-0.41367	0.147062	0.0123784	CG5214
FBgn0003950	-3.84797	0.147094	0.0123976	unc
FBgn0261928	2.89807	0.147306	0.0124319	CG42795
FBgn0029667	2.16151	0.147314	0.0124491	Gas8
FBgn0263510	-0.403376	0.147615	0.012491	nclb
FBgn0029689	0.397189	0.147907	0.0125322	CG6428
FBgn0046296	0.366739	0.149209	0.0126592	CG11534
FBgn0039114	-2.87137	0.14967	0.0127151	Lsd-1
FBgn0002036	0.518064	0.149727	0.0127367	CG10561
FBgn0038114	1.74475	0.150534	0.0128316	CG11670
FBgn0266361	2.10263	0.150534	0.012839	CR45009
FBgn0028380	0.3093	0.150611	0.0128818	fal
FBgn0266215	-0.613456	0.150611	0.0128958	CR44910
FBgn0051296	1.47821	0.150611	0.0129032	CG31296
FBgn0263231	-0.400417	0.150611	0.0129129	bel
FBgn0004556	-0.339788	0.15182	0.0130335	Dbp73D
FBgn0001991	2.76418	0.152246	0.0130943	Ca-alpha1D
FBgn0259979	-0.415284	0.152246	0.0131182	CG17337
FBgn0029174	-0.375121	0.152246	0.0131411	FKBP59
FBgn0050466	-0.312781	0.152246	0.0131521	CG30466
FBgn0029685	0.288692	0.152246	0.0131552	CG2938
FBgn0032521	-0.454958	0.152376	0.0131973	CG7110
FBgn0001091	-0.321864	0.152376	0.0132005	Gapdh1
FBgn0004449	0.82127	0.152495	0.0132278	Ten-m
FBgn0034117	-0.699968	0.152889	0.0132794	CG7997
FBgn0025640	-0.412446	0.152889	0.0132962	CG13369
FBgn0020307	0.562419	0.153162	0.0133371	dve
FBgn0032597	0.359884	0.153418	0.0133765	CG17904
FBgn0036569	-0.396024	0.153421	0.0133939	CG5414
FBgn0015929	-0.371588	0.153718	0.0134633	dpa
FBgn0030396	0.301828	0.153718	0.013468	CG2556
FBgn0036890	2.4113	0.153718	0.0134713	CG9368
FBgn0033264	-0.427147	0.153865	0.0135015	Nup50
FBgn0025702	1.97869	0.154012	0.0135315	srpk79D
FBgn0035505	2.24472	0.154574	0.0135982	Teh2
FBgn0020647	0.552299	0.155733	0.0137176	KrT95D
FBgn0260750	-0.297586	0.155799	0.0137554	Mulk
FBgn0026148	0.545068	0.155799	0.0137582	CG12253
FBgn0000042	-0.337179	0.155984	0.013792	Act5C
FBgn0261975	-0.546703	0.156259	0.0138338	CG42806
FBgn0010213	-0.497985	0.156512	0.0138737	Sod2
FBgn0032029	0.575494	0.156558	0.0138953	CG17292
FBgn0034318	2.95633	0.156822	0.0139519	CG14500
FBgn0039064	3.03453	0.156822	0.013963	CG4467
FBgn0266819	0.562524	0.156822	0.0139713	CR45281
FBgn0260660	1.42963	0.157503	0.0140496	Mp
FBgn0031496	3.08628	0.157902	0.0141028	CG17258
FBgn0034091	-0.36661	0.157937	0.0141265	mrj
FBgn0260486	0.968677	0.157937	0.0141413	Ziz
FBgn0038118	-0.540907	0.158026	0.0141668	timeout
FBgn0030600	1.04092	0.158032	0.0141851	hiw
FBgn0031878	-0.550996	0.15809	0.014208	sip2
FBgn0037672	0.979574	0.158114	0.0142278	sage
FBgn0000024	2.2423	0.158418	0.014282	Ace
FBgn0036186	0.810811	0.158418	0.0142944	CG6071
FBgn0032147	0.379442	0.158418	0.0143203	IP3K1
FBgn0086704	1.58769	0.158418	0.0143493	stops
FBgn0011774	0.441396	0.158418	0.0143593	Irbp
FBgn0263200	-0.47003	0.158418	0.0143964	Galt
FBgn0000071	1.38005	0.158418	0.014403	Ama
FBgn0032002	0.661928	0.158418	0.0144132	CG8353
FBgn0085438	2.50797	0.158418	0.0144312	CG34409
FBgn0002873	-0.707532	0.158418	0.0144322	mud
FBgn0052579	0.435122	0.158484	0.0144717	CG32579
FBgn0262716	-0.302346	0.158484	0.0144736	Arp3
FBgn0031118	0.535851	0.158615	0.0145669	RhoGAP19D
FBgn0058042	-0.421782	0.158615	0.0145685	CG40042
FBgn0263351	-0.30577	0.158615	0.0145712	AP-2mu
FBgn0035211	0.479956	0.158615	0.0145827	CG2211
FBgn0086355	-0.316088	0.158615	0.0145868	Tpi
FBgn0086447	-0.66806	0.158615	0.014592	l(2)37Cg
FBgn0050488	1.17159	0.158694	0.0146466	antr
FBgn0030718	-0.45395	0.158694	0.0146544	CG9172
FBgn0003423	1.3347	0.158694	0.0146805	slgA
FBgn0085353	3.35841	0.158694	0.0146864	CG34324
FBgn0033274	-0.794832	0.158694	0.014688	CG14757
FBgn0035083	-0.37115	0.159019	0.0147479	Tina-1
FBgn0032956	0.384838	0.159019	0.0147725	Cul2
FBgn0028988	0.798884	0.159019	0.0147847	Spn42Dd
FBgn0032925	-0.410103	0.159019	0.0147892	CG9246
FBgn0034924	2.12688	0.159074	0.0148121	CG17658
FBgn0053547	2.68821	0.159522	0.0148716	Rim
FBgn0262738	0.51354	0.159953	0.014953	norpA
FBgn0014906	-0.283026	0.159953	0.0149547	Hydr2
FBgn0053532	1.40607	0.159953	0.0149654	lectin-37Da
FBgn0004106	-0.655769	0.160407	0.0150258	Cdk1
FBgn0004868	-0.288865	0.160463	0.015049	Gdi
FBgn0028647	0.480315	0.161647	0.0151859	CG11902
FBgn0029502	-0.404476	0.161647	0.0152096	COQ7
FBgn0039688	1.24851	0.161647	0.0152143	Kul
FBgn0030398	0.719411	0.161863	0.0152527	Cpr11B
FBgn0027093	-0.302803	0.162704	0.0153641	Aats-arg
FBgn0036331	0.468657	0.162704	0.0153683	CG14117
FBgn0262619	-0.467299	0.162791	0.0153948	DNA-ligI
FBgn0261046	0.833479	0.163192	0.0154631	Dscam3
FBgn0040850	1.01661	0.163192	0.0154692	CG15210
FBgn0000996	-0.48697	0.163595	0.0155313	dup
FBgn0031693	1.10824	0.163595	0.0155439	Cyp4ac1
FBgn0021825	-0.358348	0.165469	0.0157488	Dmn
FBgn0013765	0.479132	0.165469	0.015759	cnn
FBgn0039205	0.703004	0.16596	0.0158243	CG13623
FBgn0262631	1.51042	0.166127	0.0158588	CR43148
FBgn0265957	1.00866	0.166438	0.015907	CR44744
FBgn0036725	1.74597	0.166717	0.0159523	CG18265
FBgn0033616	0.475257	0.166724	0.0159716	CG7745
FBgn0264446	1.15626	0.167061	0.0160226	CR43864
FBgn0026761	-0.298969	0.167858	0.0161179	Trap1
FBgn0031631	-1.50839	0.168322	0.016198	CG3225
FBgn0030230	1.17402	0.168322	0.0162	Rph
FBgn0035445	1.2937	0.169731	0.0163545	CG12014
FBgn0033054	1.69046	0.169939	0.0163937	CG14591
FBgn0267024	1.25679	0.170068	0.0164251	CR45468
FBgn0005660	0.390803	0.170673	0.0165158	Ets21C
FBgn0034931	0.729629	0.170673	0.0165216	CG2812
FBgn0032123	-0.495917	0.171316	0.016603	Oatp30B
FBgn0265991	0.456209	0.17138	0.0166323	Zasp52
FBgn0011710	-0.259667	0.17138	0.0166476	2020-09-01
FBgn0025742	-0.307943	0.171454	0.0167022	mtm
FBgn0085377	0.314185	0.171454	0.0167224	CG34348
FBgn0039955	-0.324181	0.171454	0.0167296	CG41099
FBgn0261243	-0.294608	0.171454	0.0167314	Psa
FBgn0040383	-0.361982	0.171844	0.0167887	CG5254
FBgn0036301	-0.484061	0.17188	0.0168114	CG4069
FBgn0033404	0.917594	0.172007	0.016843	Or45a
FBgn0031285	-0.323305	0.172116	0.016873	CG3662
FBgn0021776	0.427205	0.172204	0.0169008	mira
FBgn0035298	-0.343408	0.172651	0.0169942	SCOT
FBgn0039358	-0.280317	0.172651	0.0169946	CG5028
FBgn0029755	-0.387604	0.172651	0.0170245	Sas10
FBgn0038601	-0.36814	0.172651	0.0170325	CG18600
FBgn0039761	2.02358	0.172651	0.0170412	CG18404
FBgn0035707	-0.308064	0.172963	0.0170914	CG8368
FBgn0039099	0.878755	0.173038	0.0171235	GILT2
FBgn0037758	0.326782	0.173038	0.0171374	CG9467
FBgn0250788	-0.540111	0.173538	0.0172179	beta-Spec
FBgn0085223	0.630567	0.173538	0.0172516	CG34194
FBgn0264324	1.06325	0.173538	0.0172536	spg
FBgn0263986	1.79449	0.173538	0.0172645	cd
FBgn0267378	-0.261381	0.174183	0.0173482	sau
FBgn0041205	0.330887	0.174482	0.0173975	key
FBgn0033051	-0.419461	0.176265	0.0176097	Strica
FBgn0003174	2.12755	0.176265	0.017627	pwn
FBgn0042174	0.384815	0.176265	0.0176344	CR18854
FBgn0261636	-1.75728	0.176495	0.017708	CR42719
FBgn0010380	-0.287072	0.176495	0.0177106	AP-1-2beta
FBgn0265760	1.62771	0.176495	0.0177166	CR44567
FBgn0265902	2.16129	0.176918	0.0177789	CR44691
FBgn0027572	0.402293	0.17697	0.0178043	CG5009
FBgn0035138	1.1998	0.17697	0.0178399	CG13884
FBgn0031170	0.485855	0.17697	0.0178434	CG1718
FBgn0026189	0.476295	0.177033	0.0178695	prominin-like
FBgn0029118	-0.497429	0.177194	0.0179296	Sucb
FBgn0034935	2.76658	0.177194	0.0179629	CG13565
FBgn0052462	2.6092	0.177194	0.0179807	CG32462
FBgn0027949	-0.59909	0.177194	0.0179924	msb1l
FBgn0036070	1.40718	0.177194	0.0180581	CG8072
FBgn0000416	-0.318002	0.177194	0.0180852	Sap-r
FBgn0030411	0.474452	0.177194	0.0181071	CG2540
FBgn0052451	0.343394	0.177194	0.0181132	SPoCk
FBgn0264746	0.786643	0.177194	0.0181363	CG44004
FBgn0033615	-0.424723	0.177194	0.0181386	CG7741
FBgn0026415	2.04782	0.177194	0.0181393	Idgf4
FBgn0010329	3.04295	0.177194	0.0181406	Tbh
FBgn0037853	0.274477	0.177194	0.0181433	CG14696
FBgn0034985	1.91688	0.178601	0.0183138	CG3328
FBgn0033074	-2.72063	0.178601	0.0183273	tomboy40
FBgn0035720	-0.338194	0.178663	0.0183663	CG10077
FBgn0042206	1.18846	0.178663	0.0183735	GstD10
FBgn0031068	0.530046	0.178975	0.0184365	Alr
FBgn0052056	-0.293093	0.178975	0.0184457	scramb1
FBgn0037810	-0.397371	0.178975	0.0184656	sle
FBgn0261090	1.92181	0.179196	0.0185275	Sytbeta
FBgn0052107	2.21824	0.179196	0.0185286	CG32107
FBgn0011570	-0.313267	0.179689	0.0186044	cpb
FBgn0031257	1.41957	0.179689	0.0186197	CG4133
FBgn0033443	2.35805	0.179693	0.0186531	CG1698
FBgn0030613	2.19747	0.179693	0.0186602	Rab3-GEF
FBgn0033000	-0.47843	0.180066	0.0187358	CG14464
FBgn0063491	0.879777	0.180066	0.0187393	GstE9
FBgn0263256	0.922672	0.180441	0.0187985	CG43394
FBgn0266705	1.68139	0.18109	0.0188944	CR45195
FBgn0004509	0.891536	0.18109	0.0189115	Fur1
FBgn0031832	-0.349407	0.18109	0.0189434	CG9596
FBgn0027329	-0.307152	0.18109	0.0189471	Tcp-1zeta
FBgn0003887	-0.308827	0.181132	0.0189717	betaTub56D
FBgn0000719	-0.34851	0.181419	0.019022	fog
FBgn0024361	0.830227	0.181622	0.0190636	Tsp2A
FBgn0004516	2.87594	0.181637	0.0190854	Gad1
FBgn0032213	2.54805	0.181938	0.0191374	CG5390
FBgn0033079	-0.337199	0.182566	0.0192239	Fmo-2
FBgn0035586	-0.308113	0.182916	0.0193133	CG10671
FBgn0032449	0.969949	0.182916	0.0193267	CG17036
FBgn0039760	2.81998	0.182916	0.019338	CG9682
FBgn0001977	0.277031	0.182916	0.0193561	CIAPIN1
FBgn0036191	0.410626	0.182916	0.019363	Sug
FBgn0035077	2.01595	0.182933	0.0193853	CG9083
FBgn0001341	-0.494001	0.182973	0.0194254	l(1)1Bi
FBgn0040397	0.803424	0.182973	0.0194446	CG3655
FBgn0027654	2.44459	0.182973	0.0194508	jdp
FBgn0029882	-0.482411	0.183132	0.0194888	CG3226
FBgn0030877	0.271234	0.183132	0.0195087	Arp8
FBgn0035699	1.13158	0.183786	0.0195989	CG13300
FBgn0024995	-0.737531	0.184103	0.0196533	CG2680
FBgn0033259	-0.292744	0.185365	0.0198087	CG11210
FBgn0038603	1.60054	0.185395	0.0198326	PKD
FBgn0032684	2.71957	0.186106	0.0199296	CG10178
FBgn0053985	1.13862	0.187385	0.0200874	CG33985
FBgn0021979	-0.276547	0.187652	0.0201371	l(2)k09913
FBgn0002633	0.940325	0.188472	0.0202461	E(spl)m7-HLH
FBgn0038080	-0.605141	0.188758	0.0202979	CG12279
FBgn0266284	-0.300849	0.190961	0.0205562	Ns3
FBgn0051974	-0.538066	0.191064	0.0206095	CG31974
FBgn0001092	-0.337414	0.191064	0.02061	Gapdh2
FBgn0011771	-0.297613	0.191837	0.0207256	Hem
FBgn0039840	2.43623	0.191837	0.0207363	CG11340
FBgn0263236	1.77081	0.192314	0.0208093	SP1029
FBgn0034371	0.596136	0.192664	0.0208687	SP2637
FBgn0052549	0.364326	0.192747	0.0208992	CG32549
FBgn0030774	1.60407	0.193042	0.0209528	spheroide
FBgn0040250	-0.408884	0.193525	0.0210269	Ugt86Dj
FBgn0039294	1.06437	0.19362	0.0210654	Cad96Cb
FBgn0013469	0.431322	0.19362	0.0210805	klu
FBgn0035978	0.319261	0.193662	0.0211302	UGP
FBgn0260658	0.829983	0.193662	0.0211313	CG42541
FBgn0031517	1.06062	0.193662	0.02115	CG15406
FBgn0031897	0.407959	0.19412	0.0212217	CG13784
FBgn0010583	-0.328899	0.194599	0.0212959	dock
FBgn0264862	0.786391	0.194681	0.0213265	CR44053
FBgn0030035	-0.381431	0.195368	0.0214237	CG11190
FBgn0036335	-0.821255	0.196214	0.0215434	mRpL20
FBgn0039474	2.80431	0.196214	0.0215603	CG6283
FBgn0031473	2.40393	0.196655	0.0216308	CG3104
FBgn0031515	0.790443	0.196692	0.0216567	CG9664
FBgn0085371	2.33967	0.196703	0.02168	CG34342
FBgn0039647	2.21011	0.197097	0.0217454	CG14509
FBgn0035849	0.290423	0.197308	0.0217908	ERR
FBgn0035064	-0.417385	0.197711	0.0218574	Aats-tyr-m
FBgn0015245	-0.303319	0.198002	0.0219152	Hsp60
FBgn0032478	0.530577	0.198002	0.021943	CG5458
FBgn0037140	1.0223	0.198002	0.0219723	CG7442
FBgn0029095	2.87973	0.198002	0.0219805	aru
FBgn0039828	-0.363099	0.198002	0.0220002	CG1542
FBgn0028381	0.386782	0.198105	0.0220702	Decay
FBgn0004228	0.681613	0.198105	0.0220704	mex1
FBgn0266275	1.10165	0.198105	0.0220781	CR44960
FBgn0087021	-0.763934	0.198769	0.0221911	Spc25
FBgn0263740	-0.282883	0.198769	0.0222078	eIF-2gamma
FBgn0000636	0.510346	0.198769	0.0222187	Fas3
FBgn0031275	2.35787	0.199036	0.0222709	GABA-B-R3
FBgn0266644	0.37543	0.199395	0.0223333	CR45151
FBgn0013269	-0.467413	0.199467	0.0223637	FK506-bp1
FBgn0037880	0.438017	0.200049	0.0224512	CG17726
FBgn0259711	0.775669	0.200138	0.0224837	CG42365
FBgn0015568	-1.08683	0.200303	0.0225245	alpha-Est1
FBgn0035947	-0.240719	0.200548	0.0225974	Srp68
FBgn0051678	0.383224	0.200548	0.0226455	CG31678
FBgn0050043	-0.46658	0.200548	0.0226593	CG30043
FBgn0000075	2.32708	0.200548	0.0226622	amd
FBgn0004888	-0.329855	0.200548	0.0226643	Scsalpha
FBgn0021872	0.381865	0.200742	0.0227086	Xbp1
FBgn0032911	2.68788	0.201085	0.0227698	tadr
FBgn0013275	-1.0066	0.201169	0.022814	Hsp70Aa
FBgn0085399	-0.775777	0.201169	0.0228382	CG34370
FBgn0046214	-0.314714	0.201169	0.0228469	vig2
FBgn0051549	0.481259	0.201462	0.0229026	CG31549
FBgn0034051	-0.311847	0.201958	0.0229997	Mlf
FBgn0051030	2.51023	0.201958	0.0230214	CG31030
FBgn0031307	0.750378	0.201958	0.0230267	MFS3
FBgn0026084	-0.33376	0.202005	0.0230786	cib
FBgn0037305	-0.560369	0.202005	0.0230819	CG12173
FBgn0040765	-0.89734	0.202005	0.0230999	luna
FBgn0062517	0.643058	0.202375	0.0231648	CG16984
FBgn0031042	0.935282	0.202605	0.0232137	CG14221
FBgn0263916	-0.298953	0.2027	0.0232473	Ent2
FBgn0050349	-0.382691	0.203005	0.023305	CG30349
FBgn0259224	2.90733	0.204691	0.0235214	CG42324
FBgn0033883	-0.44633	0.204889	0.023567	CG16935
FBgn0022160	-0.350412	0.205444	0.0236539	Gpo-1
FBgn0026196	-0.281036	0.205471	0.0236799	nop5
FBgn0259246	1.76818	0.205811	0.0237482	brp
FBgn0034704	0.282079	0.205811	0.0237651	CG6758
FBgn0259937	-0.254714	0.206018	0.0238215	Nop60B
FBgn0043070	-0.265203	0.206018	0.0238452	MESK2
FBgn0033190	0.971343	0.206018	0.0238645	CG2137
FBgn0038316	0.307828	0.206018	0.0238812	CG6276
FBgn0024321	0.269984	0.206251	0.0239656	NK7.1
FBgn0036354	-0.498438	0.206251	0.023977	Poc1
FBgn0036777	0.485936	0.206251	0.0239774	CG7341
FBgn0015268	-0.268679	0.206312	0.0240075	Nap1
FBgn0267429	1.24382	0.206312	0.024033	CG45782
FBgn0039182	-0.418995	0.206312	0.0240608	CG5728
FBgn0001226	-1.48392	0.206312	0.02412	Hsp27
FBgn0260439	-0.315971	0.206312	0.0241274	Pp2A-29B
FBgn0259791	-2.20404	0.206312	0.0241413	bora
FBgn0032138	-0.356199	0.206312	0.0241759	CG4364
FBgn0038074	2.4945	0.206312	0.0241827	Gnmt
FBgn0001124	-0.29725	0.206312	0.024192	Got1
FBgn0010246	-0.469619	0.206585	0.024272	Myo61F
FBgn0051029	1.14705	0.206585	0.0242827	CG31029
FBgn0015805	-0.37137	0.206585	0.0243032	Rpd3
FBgn0038746	-0.30292	0.206585	0.0243373	Surf6
FBgn0243516	-0.367622	0.206585	0.0243394	Vrp1
FBgn0085424	0.973108	0.208254	0.0245593	nub
FBgn0029091	-0.707917	0.20861	0.0246513	CS-2
FBgn0035904	0.510702	0.20861	0.0247074	GstO3
FBgn0267588	-0.262683	0.20861	0.0247153	CR45926
FBgn0082582	-0.297974	0.20861	0.0247195	tmod
FBgn0016032	-0.320421	0.20861	0.0247498	lbm
FBgn0031579	0.652784	0.20861	0.0247963	CG15422
FBgn0085409	-0.703187	0.20861	0.024807	CG34380
FBgn0033960	2.49636	0.20861	0.0248087	CG10151
FBgn0040364	-0.407261	0.20861	0.0248112	CG11378
FBgn0262816	-0.450236	0.209308	0.0249177	CG43187
FBgn0034085	0.771051	0.20965	0.0250355	Ptp52F
FBgn0034356	0.984994	0.20965	0.0250394	CG10924
FBgn0015946	1.37704	0.20965	0.0250495	grim
FBgn0032021	0.863932	0.20965	0.0250628	CG7781
FBgn0038519	-0.465722	0.20965	0.0250756	Prx3
FBgn0039486	2.06654	0.209889	0.0251276	CG6074
FBgn0262524	0.692108	0.210044	0.0251696	ver
FBgn0033785	1.57309	0.210214	0.0252134	Sans
FBgn0034062	0.34885	0.210221	0.0252378	CG8388
FBgn0028691	-0.304237	0.211447	0.0254086	Rpn9
FBgn0085261	-0.432422	0.211471	0.0254551	CG34232
FBgn0011692	-0.687112	0.211471	0.0254792	pav
FBgn0263602	0.331157	0.211471	0.0254824	Taspase1
FBgn0034405	-0.265889	0.211713	0.0255614	Jheh2
FBgn0023169	-0.281196	0.211713	0.0255865	AMPKalpha
FBgn0028473	-0.354965	0.211713	0.0255952	Non1
FBgn0032397	-0.302616	0.211713	0.0256062	Tom70
FBgn0039207	0.339366	0.212121	0.0256793	CG5789
FBgn0001086	-0.916479	0.213365	0.0258537	fzy
FBgn0010316	0.282132	0.213463	0.0259064	dap
FBgn0032453	-0.474691	0.213463	0.0259133	CG6180
FBgn0003449	-0.416874	0.213468	0.0259379	snf
FBgn0264617	-1.86269	0.213512	0.0259852	CR43957
FBgn0039304	-0.306381	0.213512	0.025991	CG10425
FBgn0033471	-0.377184	0.213607	0.0260263	CG12134
FBgn0027783	-0.304887	0.213953	0.0261457	SMC2
FBgn0001104	-0.241448	0.213953	0.0261886	Galphai
FBgn0035977	0.443327	0.213953	0.0261958	PGRP-LF
FBgn0039868	-0.395516	0.213953	0.0261996	CG11563
FBgn0065098	1.233	0.213953	0.0262011	RNaseMRP:RNA
FBgn0259707	0.768499	0.213953	0.0262258	CG42361
FBgn0027578	1.16747	0.213953	0.0262359	CG14526
FBgn0039627	-0.358553	0.215226	0.026428	CG11837
FBgn0038815	0.756614	0.215226	0.0264402	CG5466
FBgn0039714	0.261294	0.215555	0.0265064	Zip99C
FBgn0036929	0.310851	0.215555	0.0265288	CG7668
FBgn0051956	1.93977	0.215555	0.0265528	pgant4
FBgn0033649	0.583453	0.215892	0.0266185	pyr
FBgn0039756	-0.361581	0.216309	0.0266941	CG9743
FBgn0039329	0.56879	0.216514	0.0268071	CG10669
FBgn0002631	0.888572	0.216514	0.0268435	E(spl)m5-HLH
FBgn0052313	1.24756	0.216514	0.0268604	CG32313
FBgn0029896	1.91347	0.216514	0.0268863	CG3168
FBgn0037107	2.89707	0.216514	0.0268913	CG7166
FBgn0086356	-0.501181	0.216514	0.0269096	tum
FBgn0023531	0.681301	0.216514	0.0269203	CG32809
FBgn0037824	0.733484	0.216514	0.0269469	CG14684
FBgn0037076	0.4368	0.216514	0.0269515	ebd2
FBgn0050049	0.622119	0.216514	0.0269613	CG30049
FBgn0003507	0.437749	0.21687	0.0270472	srp
FBgn0021768	-0.391518	0.21687	0.0270542	nudC
FBgn0022069	-0.276996	0.21698	0.0270922	Nnp-1
FBgn0027537	-0.227438	0.217379	0.0271814	Nup93-1
FBgn0030795	0.746035	0.217379	0.0271906	ppk28
FBgn0023179	2.06376	0.217498	0.0272356	amon
FBgn0036213	-0.440275	0.217498	0.0272541	RpL10Ab
FBgn0050106	2.93239	0.217684	0.0273158	CCHa1-R
FBgn0004507	-0.236596	0.217684	0.0273261	GlyP
FBgn0032407	-0.325384	0.218407	0.0274412	Pex19
FBgn0067102	0.313356	0.219218	0.0275676	GlcT-1
FBgn0033135	1.39113	0.21965	0.0276465	Tsp42En
FBgn0036895	2.71215	0.220708	0.0278044	ms(3)76Cc
FBgn0263598	-0.236358	0.222206	0.0280179	Vha68-2
FBgn0029834	1.69638	0.222288	0.0280667	CG5937
FBgn0037517	0.791464	0.222288	0.0280859	CG10086
FBgn0037955	-0.318619	0.222288	0.0281028	CG6950
FBgn0036144	1.52214	0.222374	0.0281386	GlcAT-P
FBgn0029137	1.97473	0.223087	0.0282536	Patsas
FBgn0029994	-1.15786	0.223139	0.0282919	CG2254
FBgn0267611	1.99495	0.223139	0.0283131	CR45949
FBgn0030629	1.10264	0.223139	0.0283351	CG9123
FBgn0036565	-0.359015	0.223656	0.0284258	CG5235
FBgn0037921	0.321862	0.22443	0.0285692	CG6808
FBgn0037566	-0.327535	0.22443	0.0285941	mRpL1
FBgn0016076	0.368054	0.22443	0.0286085	vri
FBgn0050047	1.39191	0.22443	0.0286245	CG30047
FBgn0032814	0.311797	0.22538	0.0287709	CG10366
FBgn0037981	0.321308	0.225545	0.0288332	Spt3
FBgn0043853	0.74457	0.225545	0.0288423	scaRNA:MeU5-C46
FBgn0040777	-0.253306	0.225587	0.0288902	CG14767
FBgn0034650	0.304971	0.225587	0.0289113	NC2alpha
FBgn0026438	1.47784	0.225587	0.0289233	Eaat2
FBgn0263081	1.06159	0.225965	0.028997	CG43349
FBgn0051118	0.488319	0.226023	0.0290298	RabX4
FBgn0039562	0.551672	0.226131	0.029117	Gp93
FBgn0031868	-0.258405	0.226131	0.0291396	Rat1
FBgn0030686	-0.340238	0.226131	0.0291605	mRpL3
FBgn0263111	0.828447	0.226131	0.0291645	cac
FBgn0000463	-0.441435	0.226131	0.02917	Dl
FBgn0039137	0.39074	0.227385	0.0293634	CG13604
FBgn0261801	0.53094	0.227385	0.0293914	CG42747
FBgn0015271	-0.694487	0.227385	0.0294081	Orc5
FBgn0002022	-0.285809	0.227475	0.0294601	Catsup
FBgn0001230	-1.34986	0.227475	0.0294705	Hsp68
FBgn0032988	-0.249318	0.227688	0.0295236	Tif-IA
FBgn0003676	-0.346912	0.227768	0.0295594	T-cp1
FBgn0035524	-0.34969	0.227923	0.0296051	CG11583
FBgn0030081	-0.709138	0.228393	0.0296916	CG7246
FBgn0032391	0.60314	0.229059	0.0298038	escl
FBgn0003525	-0.682014	0.230741	0.0300484	stg
FBgn0002673	-0.806512	0.231616	0.0301883	twe
FBgn0038183	-0.437827	0.232001	0.0302758	CG9286
FBgn0031684	-0.454616	0.232001	0.0303083	CG8680
FBgn0036754	-0.457289	0.232001	0.030365	CG5589
FBgn0033987	-0.670564	0.232001	0.0303909	ckn
FBgn0263873	-0.564856	0.232001	0.0303916	sick
FBgn0035244	-0.249661	0.232001	0.0303941	ABCB7
FBgn0015829	0.409168	0.232362	0.0304673	TfIIEbeta
FBgn0267728	0.937421	0.232499	0.0305112	otk2
FBgn0085426	2.92644	0.23271	0.0305775	Rgk3
FBgn0031456	0.298542	0.23271	0.0306475	Trn-SR
FBgn0039737	-0.401584	0.23271	0.0306556	CG7920
FBgn0266369	0.593893	0.23271	0.0306611	Mtp
FBgn0038869	-0.321092	0.23271	0.030669	CG3353
FBgn0038854	0.325536	0.233504	0.0307998	CG7044
FBgn0036117	-0.698722	0.233549	0.0308341	CG6321
FBgn0051015	2.18419	0.233549	0.0308599	PH4alphaPV
FBgn0035473	-0.320607	0.233549	0.0308855	mge
FBgn0003278	-0.272786	0.233549	0.0309146	RpI135
FBgn0035896	-0.481166	0.233549	0.0309362	CG6983
FBgn0035996	0.636929	0.233968	0.0310305	CG3448
FBgn0020513	-0.268554	0.233968	0.0310541	ade5
FBgn0031397	0.782065	0.233968	0.0310878	CG15385
FBgn0026634	-0.286338	0.233968	0.0310963	ldlCp
FBgn0036806	2.18164	0.23482	0.0312376	Cyp12c1
FBgn0062442	-0.390442	0.23482	0.0312621	Cisd2
FBgn0052311	-1.11678	0.235123	0.0313287	zormin
FBgn0031479	-0.506711	0.235361	0.0313874	Prx6005
FBgn0001218	0.520922	0.235361	0.031413	Hsc70-3
FBgn0011703	-0.37001	0.235527	0.0314616	RnrL
FBgn0039128	-0.670074	0.23577	0.0315203	CG13599
FBgn0033761	-0.396004	0.236373	0.0316273	CG8778
FBgn0053193	0.342247	0.236399	0.0316604	sav
FBgn0029148	-0.533352	0.236399	0.0316837	NHP2
FBgn0000139	-0.349878	0.23799	0.0319497	ash2
FBgn0030120	0.964354	0.23799	0.0319501	CG17440
FBgn0267091	2.27628	0.239417	0.0321684	CR45535
FBgn0032487	-0.592395	0.239423	0.032196	Ski6
FBgn0037408	2.07841	0.239545	0.0322661	NPFR
FBgn0266258	0.704533	0.239545	0.0322728	CR44953
FBgn0030991	-0.323851	0.239545	0.0322928	CG7453
FBgn0035336	-0.378083	0.239951	0.0323744	CG9004
FBgn0031169	2.08107	0.240069	0.0324171	CG1494
FBgn0050460	0.38349	0.240643	0.0325216	CG30460
FBgn0014342	-0.629197	0.240643	0.0326547	mia
FBgn0038738	-0.438887	0.240643	0.0326576	CG4572
FBgn0001296	-0.272713	0.240643	0.0326598	kar
FBgn0038051	1.40914	0.240643	0.032707	CG17207
FBgn0000611	-0.300531	0.240643	0.0327094	exd
FBgn0016120	-0.408241	0.240643	0.0327268	ATPsyn-d
FBgn0039635	-0.336512	0.240643	0.0327563	CG11876
FBgn0036916	-0.605983	0.240643	0.0327659	Mtr3
FBgn0029861	0.27887	0.240643	0.0327871	CG3815
FBgn0038805	-0.266566	0.240643	0.0327905	TFAM
FBgn0020930	0.317767	0.241654	0.0329981	Dgkepsilon
FBgn0053267	1.71235	0.241654	0.0330079	CG33267
FBgn0030628	0.281299	0.241654	0.0330092	CG9114
FBgn0030552	-0.275328	0.241714	0.0330626	mRpL38
FBgn0032217	-0.332524	0.241714	0.033079	CG4972
FBgn0027547	-0.247349	0.241714	0.0330986	CG1927
FBgn0030945	0.419288	0.242455	0.0332271	Ing3
FBgn0039006	0.351242	0.242469	0.0332742	Cyp6d4
FBgn0263080	1.15545	0.242469	0.0332909	CG43348
FBgn0031381	-0.45945	0.242469	0.033323	Npc2a
FBgn0032848	-0.559166	0.242469	0.0333374	nesd
FBgn0031886	-0.565956	0.242481	0.0333662	Nuf2
FBgn0267636	1.38506	0.242648	0.0334163	CR45974
FBgn0010333	-0.223389	0.24288	0.0334819	Rac1
FBgn0001220	-0.302489	0.24288	0.0335148	Hsc70-5
FBgn0034655	0.782159	0.24288	0.0335297	CG10307
FBgn0051122	0.339802	0.243062	0.0336008	CG31122
FBgn0033741	-0.40857	0.243062	0.0336092	CG8545
FBgn0039743	-0.314235	0.243236	0.0336662	CG7946
FBgn0028892	2.06278	0.243236	0.0336876	CG4161
FBgn0015571	0.722823	0.243341	0.0337499	alpha-Est3
FBgn0264090	0.572299	0.243341	0.0337571	CG43759
FBgn0039543	0.409709	0.243341	0.0337955	CG12428
FBgn0042627	1.60832	0.243341	0.0338536	v(2)k05816
FBgn0001986	-0.282506	0.243341	0.033874	l(2)35Df
FBgn0035679	-0.359347	0.243341	0.0338987	CG10467
FBgn0034708	-0.221902	0.243341	0.0339032	Vps35
FBgn0265623	0.532897	0.243341	0.0339439	Su(z)2
FBgn0037185	0.522219	0.243341	0.0339735	CG11367
FBgn0032774	1.37245	0.243341	0.0339742	CG17549
FBgn0035085	-0.346721	0.243501	0.0340286	CG3770
FBgn0033115	0.570965	0.243501	0.0340509	Spn42De
FBgn0260991	-0.313545	0.24379	0.0341187	Incenp
FBgn0000316	-0.24456	0.243883	0.0341777	cin
FBgn0026570	0.406353	0.243883	0.0341861	CG5704
FBgn0263593	0.387445	0.244732	0.0343325	Lpin
FBgn0261429	1.19199	0.244891	0.0343982	CR42646
FBgn0052801	1.01722	0.244891	0.0344425	CG32801
FBgn0264945	-0.241663	0.244891	0.0344623	CR44114
FBgn0036921	-0.295398	0.244891	0.0344844	RhoGDI
FBgn0266199	0.790517	0.244891	0.0345061	CR44894
FBgn0015270	-0.428683	0.244891	0.0345377	Orc2
FBgn0035960	0.558525	0.244891	0.0345465	CG4942
FBgn0029506	0.897781	0.244912	0.0345767	Tsp42Ee
FBgn0262741	0.450052	0.245062	0.0346254	MRE23
FBgn0002174	-0.291451	0.245245	0.0346786	l(2)tid
FBgn0004512	1.40601	0.245245	0.0347107	Mdr49
FBgn0001098	-0.400434	0.245245	0.0347335	Gdh
FBgn0039776	-0.334908	0.245657	0.0348193	PH4alphaEFB
FBgn0032387	2.32302	0.246641	0.0349908	CG16965
FBgn0032949	-0.334947	0.246641	0.0350139	Lamp1
FBgn0035124	1.11861	0.246644	0.0350418	ttm2
FBgn0027569	0.23543	0.2473	0.035166	cert
FBgn0027558	0.337823	0.2473	0.0352297	pgant3
FBgn0033713	0.260885	0.2473	0.0352312	CG8841
FBgn0033652	0.627932	0.2473	0.0352456	ths
FBgn0032087	0.732028	0.247567	0.0353746	CG9568
FBgn0267545	0.446451	0.247567	0.0354031	CR45885
FBgn0034814	0.283154	0.247567	0.0354195	CG9890
FBgn0037548	0.558899	0.247567	0.0354275	CG7900
FBgn0020235	-0.354315	0.247567	0.0354311	ATPsyn-gamma
FBgn0086359	0.76118	0.247567	0.0354691	Invadolysin
FBgn0031191	0.434377	0.247567	0.0354815	Cp110
FBgn0004368	0.526053	0.247567	0.0355051	Ptp4E
FBgn0034292	1.72465	0.247848	0.0355732	CG5767
FBgn0261285	0.335836	0.248066	0.0356321	Ppcs
FBgn0003963	0.796107	0.248346	0.0357001	ush
FBgn0035867	0.325428	0.248381	0.0357697	CG13671
FBgn0085638	-0.434193	0.248381	0.0357708	CG41378
FBgn0085188	-0.32143	0.248381	0.0358052	CG34159
FBgn0027779	-0.263648	0.248381	0.0358424	VhaSFD
FBgn0029756	0.432517	0.248381	0.035862	CG3309
FBgn0031707	1.19729	0.248381	0.0358717	CG14020
FBgn0011260	-0.304653	0.24848	0.035941	Sema-2a
FBgn0032813	1.09238	0.24848	0.0359436	CG10262
FBgn0028562	0.826754	0.24848	0.0359792	sut2
FBgn0038100	0.26148	0.24848	0.0359976	Paip2
FBgn0051126	-0.523269	0.24848	0.0360435	CG31126
FBgn0264492	-0.21909	0.24848	0.0360526	CkIIalpha
FBgn0260456	-0.317128	0.24853	0.0361089	CG4806
FBgn0038675	0.412018	0.24853	0.0361155	CG6013
FBgn0037174	0.983323	0.248551	0.0361464	CG14457
FBgn0265377	1.36184	0.248585	0.036179	CR44318
FBgn0003401	-0.778276	0.24867	0.0362192	shu
FBgn0265982	1.19187	0.249549	0.0363752	CR44761
FBgn0022343	-0.334506	0.249699	0.036425	CG3760
FBgn0025739	-0.744263	0.249752	0.0364797	pon
FBgn0042207	1.18141	0.249752	0.0364884	CG18530
FBgn0011217	-0.243111	0.250165	0.0365999	eff
FBgn0263019	1.05737	0.250165	0.0366048	CR43314
FBgn0038063	-0.589658	0.250254	0.0366458	Octbeta2R
FBgn0264386	2.86615	0.250971	0.0367787	Ca-alpha1T
FBgn0026374	0.653333	0.251162	0.0368613	Rhp
FBgn0038734	-0.655589	0.251162	0.036863	CG11453
FBgn0010053	-0.27947	0.251747	0.036977	Jheh1
FBgn0250848	-0.372761	0.252807	0.0371608	26-29-p
FBgn0036988	0.44609	0.253001	0.0372176	CG5262
FBgn0031538	1.13916	0.253123	0.037264	CG3246
FBgn0037715	0.474726	0.253422	0.0373562	CG9399
FBgn0033735	-0.307176	0.253422	0.0373646	CG8525
FBgn0053288	0.466501	0.253754	0.037442	CG33288
FBgn0037387	1.90911	0.253986	0.0375231	CG1213
FBgn0033739	0.323685	0.253986	0.0375329	Dyb
FBgn0039508	0.301983	0.254198	0.0375926	CG3368
FBgn0038855	0.255786	0.254215	0.0376478	CG5745
FBgn0037852	0.295554	0.254215	0.037652	Tpc1
FBgn0005696	-0.53155	0.254546	0.0377361	DNApol-alpha73
FBgn0033788	0.914909	0.254546	0.0377926	CG13323
FBgn0010352	-0.301058	0.254546	0.0377966	Nc73EF
FBgn0036187	-0.279028	0.254546	0.0378238	RIOK1
FBgn0041241	2.30736	0.254546	0.0378658	Gr47b
FBgn0031457	0.338859	0.254546	0.0378908	CG3077
FBgn0039019	-0.38053	0.254546	0.0379427	HP1c
FBgn0021874	-0.287693	0.254546	0.0379502	Nle
FBgn0010215	-0.260621	0.254546	0.0379571	alpha-Cat
FBgn0000414	-0.826353	0.255443	0.0381195	Dab
FBgn0038638	-0.293259	0.255456	0.0381506	CG7702
FBgn0262679	2.40329	0.255456	0.0381784	CG43149
FBgn0034035	-0.336312	0.256041	0.0382945	CG8207
FBgn0036104	-0.269982	0.256266	0.0383843	CG6418
FBgn0032198	-0.406287	0.256266	0.0383931	eEF1delta
FBgn0037351	-0.448914	0.256266	0.0384141	RpL13A
FBgn0000565	0.521346	0.256738	0.0385228	Eip71CD
FBgn0063498	1.25873	0.256738	0.0385642	GstE2
FBgn0031126	0.369001	0.256738	0.0385887	Cyp6v1
FBgn0033902	-0.297119	0.256738	0.0386231	Tango7
FBgn0035526	-0.369221	0.256738	0.0386284	CG1316
FBgn0037001	-0.318917	0.256878	0.0386782	CG6020
FBgn0027570	1.86638	0.256964	0.0387198	Nep2
FBgn0035829	-0.62929	0.257358	0.0388079	HP4
FBgn0005655	-0.57761	0.257599	0.0388731	PCNA
FBgn0038380	2.33289	0.257773	0.0389343	CG14877
FBgn0032388	0.390481	0.257773	0.0389712	CG6686
FBgn0052057	0.510082	0.257773	0.0389858	dpr10
FBgn0004858	-0.31304	0.257784	0.0390163	elB
FBgn0025865	-0.270526	0.258991	0.0392279	Cortactin
FBgn0033402	0.279942	0.259111	0.039275	Myd88
FBgn0263391	-0.28229	0.259376	0.0393442	hts
FBgn0032018	0.340338	0.260005	0.0394686	CG7806
FBgn0033935	0.416611	0.260354	0.0395593	Sin1
FBgn0033608	-0.498211	0.260354	0.0395874	CG13220
FBgn0034296	1.01745	0.260354	0.039609	CG10912
FBgn0000412	-0.24178	0.26054	0.0396664	D1
FBgn0262955	-0.231214	0.261065	0.0397755	RpII140
FBgn0265532	0.561674	0.262534	0.0400286	CR44382
FBgn0031195	0.682787	0.262945	0.0401207	CG17600
FBgn0051410	1.94623	0.26317	0.0401845	Npc2e
FBgn0039747	1.06488	0.263412	0.0402916	AdoR
FBgn0003499	-2.15282	0.263412	0.0403086	sr
FBgn0028563	0.387047	0.263412	0.0403097	sut1
FBgn0259678	0.912193	0.263541	0.0403589	sqa
FBgn0026787	0.332987	0.264189	0.0404947	Nhe1
FBgn0035901	-0.602296	0.264189	0.0405416	CG6745
FBgn0029935	0.667543	0.264189	0.0405468	CG4615
FBgn0033789	1.82166	0.264239	0.0405839	CG13324
FBgn0035951	-0.3407	0.264407	0.0406404	CG5068
FBgn0037012	0.480481	0.264407	0.0406689	Rcd2
FBgn0085405	-0.368367	0.264794	0.0407581	CG34376
FBgn0031734	2.37553	0.265389	0.0408823	CG11147
FBgn0038947	-0.265303	0.265389	0.0409089	Sar1
FBgn0085249	1.79718	0.26544	0.0409464	CG34220
FBgn0001150	1.5842	0.26647	0.0411351	gt
FBgn0001099	0.747832	0.26648	0.0411665	gdl
FBgn0028484	-0.43323	0.266954	0.0412696	Ack
FBgn0052506	2.41686	0.266972	0.0413022	CG32506
FBgn0034709	0.492095	0.267601	0.0414508	Swim
FBgn0032120	-0.412275	0.267601	0.0414594	CG33298
FBgn0263241	0.534096	0.267847	0.0415273	Mocs1
FBgn0259112	0.407793	0.268078	0.0415931	CR42254
FBgn0029088	0.312849	0.268432	0.0417078	disp
FBgn0250874	-0.283734	0.268432	0.041708	ttm50
FBgn0259174	0.299427	0.26866	0.0417736	Nedd4
FBgn0037973	-0.632761	0.26874	0.041816	CG18547
FBgn0011661	-0.279229	0.268793	0.0418542	Moe
FBgn0266041	-0.49348	0.26886	0.0418948	CR44806
FBgn0038925	-0.354736	0.268935	0.0419365	Cchl
FBgn0036271	0.429574	0.268995	0.0419898	Pbgs
FBgn0001085	0.894424	0.268995	0.0420061	fz
FBgn0260798	-0.219979	0.269125	0.0420565	Gprk1
FBgn0026741	-0.516603	0.269885	0.0422053	mRpL18
FBgn0266929	0.997984	0.270496	0.0423437	CR45380
FBgn0022709	0.530228	0.270496	0.0423906	Adk1
FBgn0027610	-0.290975	0.270496	0.0423915	Dic1
FBgn0264517	-0.530596	0.270932	0.0424991	CR43916
FBgn0037021	0.341669	0.270932	0.0425205	CG11399
FBgn0030011	1.17918	0.271201	0.042593	Gbeta5
FBgn0020236	-0.229065	0.271454	0.0426631	ATPCL
FBgn0004921	-0.268553	0.271505	0.0427157	Ggamma1
FBgn0037718	0.567665	0.271505	0.0427383	P58IPK
FBgn0038388	0.471992	0.271505	0.0428026	CG4287
FBgn0035359	2.00374	0.271505	0.0428065	CG1143
FBgn0032666	0.698688	0.271505	0.0428228	CG5758
FBgn0030316	0.270969	0.272677	0.0430993	CG11695
FBgn0052251	-0.569213	0.272677	0.0431105	Claspin
FBgn0032699	0.44079	0.272677	0.043112	CG10383
FBgn0010341	-0.221176	0.272677	0.0431297	Cdc42
FBgn0024150	2.27401	0.27327	0.0432541	Ac78C
FBgn0028695	-0.228659	0.273571	0.0433466	Rpn1
FBgn0036422	0.885554	0.273571	0.0433628	CG3868
FBgn0053203	2.01874	0.273913	0.0434604	CG33203
FBgn0032004	1.16394	0.273913	0.043496	CG8292
FBgn0036334	-0.493648	0.273913	0.0435242	CG11267
FBgn0037199	-0.437939	0.273913	0.0435395	CG11137
FBgn0266196	-0.423601	0.274206	0.0436167	CR44891
FBgn0051901	1.65521	0.274382	0.0436754	Mur29B
FBgn0027615	-0.35393	0.274521	0.0437282	CG6404
FBgn0043005	2.93414	0.2748	0.0438033	prt
FBgn0015283	-0.310679	0.27526	0.043988	Rpn10
FBgn0036970	1.24	0.27526	0.0439918	Spn77Bc
FBgn0029937	-0.276172	0.27526	0.0439999	CG8300
FBgn0267715	0.326702	0.27526	0.0440417	CR46048
FBgn0003091	1.21079	0.27526	0.0440678	Pkc53E
FBgn0038922	-0.243812	0.27526	0.0440893	CG6439
FBgn0039129	1.43967	0.27526	0.0441024	RpS19b
FBgn0022942	-0.23329	0.27526	0.0441399	Cbp80
FBgn0085407	1.38269	0.27526	0.0441536	Pvf3
FBgn0039261	-0.223936	0.275472	0.0442185	CG6422
FBgn0000152	-0.303821	0.275561	0.0443238	Axs
FBgn0262622	1.10875	0.275561	0.0443255	CR43146
FBgn0260004	0.668318	0.275561	0.044327	Snmp1
FBgn0030992	1.1929	0.275561	0.0443558	CG33253
FBgn0261606	-0.430755	0.275611	0.0443947	RpL27A
FBgn0062978	-0.907414	0.276187	0.0445184	CG31808
FBgn0010621	-0.343662	0.27627	0.0445626	Cct5
FBgn0041180	0.370608	0.276323	0.0446021	Tep4
FBgn0039226	-0.681584	0.2764	0.0446455	Ude
FBgn0001404	0.220414	0.276958	0.0448871	egh
FBgn0028689	-0.255939	0.276958	0.0448956	Rpn6
FBgn0014011	-0.250649	0.276958	0.0448964	Rac2
FBgn0086855	0.280162	0.276958	0.0449095	CG17078
FBgn0037137	-0.25918	0.276958	0.0449179	Nopp140
FBgn0050000	0.292815	0.276958	0.0449308	GstT1
FBgn0264955	0.432082	0.276958	0.0449522	CR44124
FBgn0029914	0.233012	0.277074	0.045002	CG4558
FBgn0267768	-0.352106	0.277401	0.0450861	CR46099
FBgn0013279	-1.82367	0.277422	0.0451206	Hsp70Bc
FBgn0250907	1.47531	0.277788	0.0452113	Cht3
FBgn0029936	0.278132	0.277899	0.0452603	CG4617
FBgn0004367	0.475696	0.27856	0.0453991	mei-41
FBgn0038049	-0.347451	0.278633	0.0454917	CG5844
FBgn0037541	0.304872	0.278633	0.0454929	CG2747
FBgn0000146	1.95215	0.278633	0.0455044	aub
FBgn0267751	1.26613	0.279525	0.0456814	CR46082
FBgn0026313	0.36388	0.27972	0.0457445	X11L
FBgn0010292	-0.325211	0.279727	0.0457885	bys
FBgn0038662	-0.394962	0.279727	0.0458352	Mpc1
FBgn0264549	1.09737	0.279727	0.0458516	CR43928
FBgn0033426	0.364956	0.279727	0.045901	CG1814
FBgn0042205	0.412669	0.279727	0.0459032	CG18764
FBgn0039335	0.256616	0.279727	0.0459333	Vps33B
FBgn0033093	0.660088	0.280046	0.046017	CG3270
FBgn0040384	-0.298665	0.280092	0.0460865	CG32795
FBgn0039165	-0.44318	0.280092	0.0460872	CG6204
FBgn0034114	0.343159	0.281213	0.046303	CG4282
FBgn0265726	0.609202	0.281213	0.0463344	NnaD
FBgn0266129	2.26739	0.281813	0.0464648	lov
FBgn0033448	0.348145	0.281889	0.0465089	hebe
FBgn0004926	0.217979	0.282123	0.0465915	eIF-2beta
FBgn0015393	-0.462779	0.282123	0.0466415	hoip
FBgn0051721	0.444456	0.282123	0.0466421	Trim9
FBgn0034583	-0.310077	0.282284	0.0467003	CG10527
FBgn0017545	-0.416732	0.28272	0.046804	RpS3A
FBgn0033921	-1.53239	0.28457	0.0471542	tej
FBgn0053178	1.01748	0.28457	0.0471739	CG33178
FBgn0039175	-0.269229	0.28542	0.0473467	CG5706
FBgn0260985	-0.322833	0.285462	0.0474099	RfC4
FBgn0031220	1.25725	0.285462	0.0474175	CG4822
FBgn0036411	-0.22972	0.285639	0.0474975	Sox21a
FBgn0032620	-0.600869	0.285639	0.0475107	CG12288
FBgn0036762	-0.278146	0.286573	0.0477169	CG7430
FBgn0014023	-0.377705	0.286573	0.0477301	mRpL47
FBgn0030878	-0.213243	0.286875	0.0478175	CG6769
FBgn0028573	-1.02985	0.286875	0.0478446	prc
FBgn0050009	-1.04786	0.287053	0.0479174	CR30009
FBgn0266420	-0.388344	0.287053	0.0479417	Ote
FBgn0034191	-0.421759	0.287053	0.0479705	CG6984
FBgn0036999	0.653573	0.287335	0.0480498	isoQC
FBgn0030716	1.90369	0.28757	0.0481212	CG9170
FBgn0040337	-0.399266	0.287614	0.0481932	CG3021
FBgn0031542	1.15448	0.287614	0.0482375	CG15414
FBgn0002569	1.05775	0.287614	0.048238	Mal-A2
FBgn0010406	-0.305142	0.287614	0.0482571	RNaseX25
FBgn0001970	0.472798	0.287773	0.0483161	Pgant35A
FBgn0261800	-0.296477	0.287946	0.0483909	LanB1
FBgn0260866	0.374897	0.287946	0.0484187	dnr1
FBgn0032513	-0.421425	0.287946	0.0484653	CG6565
FBgn0038961	-0.282893	0.287946	0.0485566	CG13850
FBgn0026873	-0.454561	0.287946	0.048565	MED18
FBgn0261553	0.438384	0.287946	0.048577	CG42671
FBgn0004456	-0.234297	0.287946	0.0485936	mew
FBgn0265048	1.88007	0.287946	0.0486357	cv-d
FBgn0036515	-0.309692	0.287946	0.0486663	CG12304
FBgn0046247	0.258573	0.287946	0.0486701	CG5938
FBgn0035370	-0.274363	0.287946	0.0486991	Non2
FBgn0266084	0.322794	0.288605	0.0488429	Fhos
FBgn0266212	0.926928	0.288705	0.048892	CR44907
FBgn0032233	0.949082	0.289265	0.0490468	dpr19
FBgn0040319	0.282149	0.289265	0.0490609	Gclc
FBgn0030038	-0.289684	0.289265	0.0490951	CG1440
FBgn0031050	-0.298657	0.289265	0.0491162	Arp10
FBgn0038038	-0.310326	0.289665	0.0492165	CG5167
FBgn0039857	-0.43936	0.290141	0.0493582	RpL6
FBgn0027518	0.270556	0.290141	0.0493622	CG7609
FBgn0051712	0.256801	0.290438	0.0494452	CG31712
FBgn0019644	-0.365592	0.29044	0.0494781	ATPsyn-b
FBgn0020376	1.1698	0.291129	0.0496279	Sr-CIII
FBgn0035719	0.541668	0.291304	0.0496903	tow
FBgn0033342	-0.289764	0.291805	0.0498294	CG8258
FBgn0038271	-0.25954	0.291805	0.0498411	CG3731
FBgn0261862	0.310921	0.293293	0.0501366	whd
FBgn0003701	-0.503376	0.293293	0.0502259	thr
FBgn0040660	-0.397505	0.293293	0.0502475	CG13551
FBgn0030777	1.1159	0.293293	0.050288	CG9672
FBgn0266450	0.387048	0.293293	0.0502961	Kr-h1
FBgn0004907	-0.213838	0.293293	0.0503044	14-3-3zeta
FBgn0033215	1.80482	0.293293	0.0503246	CG1942
FBgn0030318	-0.210493	0.293518	0.0504665	rho-4
FBgn0035065	0.313688	0.293518	0.0504713	CG3589
FBgn0051800	-0.33885	0.293518	0.0504796	CG31800
FBgn0026261	-0.454351	0.293518	0.0505018	bonsai
FBgn0014411	-0.253632	0.293518	0.0505471	Vps26
FBgn0033983	1.10378	0.293518	0.0505734	CG10253
FBgn0050085	-0.410358	0.293518	0.0506374	Rif1
FBgn0015926	-1.15195	0.293518	0.0506456	dah
FBgn0031061	0.313868	0.293518	0.0506587	CG14232
FBgn0039966	0.312377	0.293919	0.0507606	Rab21
FBgn0028697	-0.552328	0.29405	0.0508162	RpL15
FBgn0031771	-0.283379	0.295485	0.0510972	CG9140
FBgn0003721	-0.356716	0.295508	0.0511734	Tm1
FBgn0053120	1.52328	0.295508	0.05118	CG33120
FBgn0036386	0.535034	0.295508	0.0512074	CG8833
FBgn0031776	-0.525572	0.295508	0.0512752	CG13993
FBgn0035228	-0.250965	0.295508	0.0513152	CG12091
FBgn0020618	-0.373782	0.295508	0.0513905	Rack1
FBgn0038146	-0.253508	0.295508	0.0514088	CG9799
FBgn0034442	0.549292	0.295508	0.051424	CG11257
FBgn0015925	-0.264603	0.295508	0.0514391	csul
FBgn0035600	-0.325464	0.295508	0.0514641	CG4769
FBgn0259229	2.26434	0.295508	0.0514645	CG42329
FBgn0037330	-0.411654	0.296462	0.0516774	mRpL44
FBgn0033021	-0.206278	0.296462	0.0517009	CG10417
FBgn0031231	-0.395361	0.296462	0.0517301	mRpL10
FBgn0033395	1.67664	0.297335	0.0519156	Cyp4p2
FBgn0004419	-0.220704	0.297367	0.0519544	me31B
FBgn0039596	-2.41501	0.297726	0.0520834	CG10000
FBgn0013997	-0.379535	0.297726	0.0520837	Nrx-IV
FBgn0025632	0.372735	0.297828	0.0521425	CG4313
FBgn0030836	1.84439	0.297828	0.0521682	CG8664
FBgn0044510	-0.333467	0.298105	0.0522911	mRpS5
FBgn0031995	-0.228886	0.298105	0.0523127	CG8475
FBgn0033017	-0.271386	0.298105	0.0523166	CG10465
FBgn0037934	0.832088	0.298321	0.0523966	CG6830
FBgn0036484	0.216927	0.298321	0.0524213	Pex3
FBgn0085203	0.564812	0.298377	0.052481	CG34174
FBgn0031636	1.4688	0.298377	0.0524979	CG12194
FBgn0261565	0.270529	0.298561	0.0525635	Lmpt
FBgn0027291	-0.202561	0.299314	0.0527296	l(1)G0156
FBgn0261545	-0.483654	0.300318	0.05294	CG42663
FBgn0032726	1.21532	0.300345	0.0529784	CG10621
FBgn0005677	1.96651	0.300866	0.0531038	dac
FBgn0024945	-0.250031	0.301532	0.0532552	NitFhit
FBgn0051473	0.430193	0.301534	0.0532892	CG31473
FBgn0024273	-0.352281	0.301561	0.0533277	WASp
FBgn0011659	0.293879	0.301691	0.0533847	Mlh1
FBgn0050428	-0.410324	0.301691	0.0534422	CG30428
FBgn0035294	-0.347705	0.301691	0.0534519	Mfap1
FBgn0041605	1.91196	0.302232	0.0535814	cpx
FBgn0262599	1.04919	0.302369	0.0536395	CG43129
FBgn0042712	0.332555	0.302424	0.0536832	HBS1
FBgn0086200	1.1269	0.302463	0.0537239	CR42490
FBgn0038585	-0.301243	0.303297	0.053906	Non3
FBgn0003308	1.90746	0.303632	0.0540427	ry
FBgn0051522	-0.249473	0.303632	0.0540909	CG31522
FBgn0033258	0.441634	0.303632	0.0541101	CG8712
FBgn0037122	1.86586	0.303632	0.0541208	CG14570
FBgn0032810	1.87234	0.303632	0.0541352	CG13077
FBgn0034075	1.1789	0.303739	0.0541881	Asph
FBgn0036773	0.413415	0.304143	0.0542943	CG13698
FBgn0263346	-0.236072	0.304634	0.0544485	CG43427
FBgn0027794	-0.256811	0.304634	0.05445	CG14786
FBgn0050147	0.470007	0.304905	0.0545326	Hil
FBgn0013272	-0.311216	0.305047	0.054592	Gp150
FBgn0037580	-0.276694	0.305329	0.0546816	DppIII
FBgn0033423	0.485987	0.305329	0.0547147	CG1809
FBgn0046685	0.25228	0.305329	0.0547449	Wsck
FBgn0266673	-0.371874	0.306626	0.0550118	Sec10
FBgn0029587	0.724431	0.306778	0.0550732	CG14797
FBgn0039189	0.697709	0.307067	0.0551594	CG18528
FBgn0031981	-0.569197	0.307078	0.0551959	CG7466
FBgn0010501	-0.545644	0.307086	0.0552315	Dcp-1
FBgn0000018	0.253085	0.307675	0.055395	abo
FBgn0263863	-0.353852	0.307675	0.0554071	mRpL45
FBgn0036551	-0.558261	0.307675	0.0554406	CG17029
FBgn0034579	-0.516155	0.307714	0.0554821	mRpL54
FBgn0034488	-0.237511	0.307763	0.0555684	CG11208
FBgn0259704	-0.31453	0.307763	0.0555744	CG42358
FBgn0027538	0.334782	0.307763	0.0556216	beta4GalNAcTA
FBgn0032082	0.9496	0.307763	0.0556284	CG18088
FBgn0028743	0.357001	0.307813	0.055672	Dhit
FBgn0037265	0.658728	0.308063	0.0557568	spartin
FBgn0259992	0.793775	0.308063	0.055786	CG42489
FBgn0260874	0.635382	0.308293	0.0558673	Ir76a
FBgn0032167	0.713688	0.308293	0.0559127	CG5853
FBgn0025716	-0.271417	0.308293	0.055931	Bap55
FBgn0038306	-0.436454	0.308761	0.0560836	Art3
FBgn0038275	-0.285955	0.308761	0.0560986	CG3817
FBgn0033379	-0.227981	0.308761	0.0561196	Mys45A
FBgn0030067	-0.381125	0.3088	0.0561712	Rbm13
FBgn0033381	-0.512008	0.3088	0.0561956	GstE13
FBgn0035953	0.329897	0.309976	0.0564443	CG5087
FBgn0035189	-0.442797	0.310201	0.0565199	CG9119
FBgn0035588	-0.326174	0.310345	0.0565808	CG10672
FBgn0017430	-0.390823	0.310813	0.0567388	Nelf-E
FBgn0028490	1.25399	0.310813	0.0568459	CG31705
FBgn0264776	0.773103	0.310813	0.0569058	CG44014
FBgn0267624	1.50236	0.310813	0.0569064	CR45962
FBgn0031549	-0.551549	0.310813	0.0569419	Spindly
FBgn0025457	-0.416046	0.310813	0.0569461	Bub3
FBgn0036660	0.375115	0.310813	0.0569549	CG13025
FBgn0030054	-0.291563	0.310813	0.0569749	Caf1-180
FBgn0041604	-0.547424	0.310813	0.0569866	dlp
FBgn0034487	1.03415	0.310813	0.0570137	Efhc1.2
FBgn0004832	-0.380677	0.311504	0.0571984	Xpac
FBgn0263930	0.330739	0.311504	0.0572131	dally
FBgn0259735	0.465995	0.311504	0.0572449	CG42389
FBgn0036053	-0.368468	0.311511	0.057281	iPLA2-VIA
FBgn0267736	-0.29816	0.312109	0.0574572	CR46067
FBgn0031736	-0.283048	0.312109	0.0575057	CG11030
FBgn0032934	0.370917	0.312109	0.0575078	CG8679
FBgn0050443	0.331799	0.312109	0.0575511	Opbp
FBgn0033484	2.05299	0.312109	0.0575654	CG2269
FBgn0039816	2.044	0.312282	0.0576486	CG11317
FBgn0051755	1.39664	0.312282	0.057667	SoYb
FBgn0024314	0.200714	0.312526	0.0577471	Plap
FBgn0266324	-0.449401	0.312674	0.0578094	CR44989
FBgn0036518	-0.364213	0.313427	0.0580413	RhoGAP71E
FBgn0262734	-0.252604	0.313427	0.0580486	Rbp2
FBgn0036290	0.381428	0.313427	0.0580536	CG10638
FBgn0050287	-0.648818	0.313695	0.0581384	CG30287
FBgn0020224	-0.270801	0.314117	0.0583065	Cbl
FBgn0030571	0.379877	0.314117	0.0583393	CG14414
FBgn0020371	1.07637	0.314117	0.0583664	Tim17b2
FBgn0033297	1.28024	0.314117	0.0583971	Mal-A8
FBgn0266633	0.272613	0.314117	0.0584144	CR45140
FBgn0039854	-0.316757	0.314117	0.0584767	CG1635
FBgn0266635	-0.32469	0.314117	0.0584818	CR45142
FBgn0034182	0.73786	0.314117	0.0585522	CG9640
FBgn0263219	0.601206	0.314117	0.0585628	Dscam4
FBgn0262728	1.21204	0.314117	0.0585918	Pal2
FBgn0038890	0.290813	0.314117	0.0587091	CG7956
FBgn0267712	0.284073	0.314117	0.0587325	CR46045
FBgn0027499	0.480907	0.314117	0.0587384	wde
FBgn0037958	-0.461061	0.314117	0.0587437	CG6962
FBgn0035825	0.270267	0.314117	0.0587734	CG8111
FBgn0038760	-0.23379	0.314117	0.0587785	MED25
FBgn0001565	-0.216758	0.314522	0.0589368	Hlc
FBgn0032001	0.356657	0.314522	0.0589558	CG8360
FBgn0087002	2.24807	0.314522	0.0590247	Rfabg
FBgn0051144	-0.375267	0.314522	0.0590479	CR31144
FBgn0265137	0.318991	0.314522	0.0590622	Spn42Da
FBgn0035121	-0.250628	0.314522	0.0590875	Tudor-SN
FBgn0029929	-0.432498	0.314522	0.0591085	CG4593
FBgn0035515	-0.261259	0.314522	0.0591355	CG14997
FBgn0032161	-0.561479	0.316258	0.0594973	CG4594
FBgn0267487	-0.211249	0.316299	0.0595402	Ptp61F
FBgn0267750	0.391484	0.317059	0.0597187	CR46081
FBgn0031628	0.389705	0.317083	0.0598302	CG3294
FBgn0031070	-0.634983	0.317083	0.0598425	CG12702
FBgn0036288	-0.267315	0.317083	0.0598574	CG10660
FBgn0265915	-0.26693	0.317083	0.0598999	CR44704
FBgn0034098	1.31609	0.317083	0.0600173	krimp
FBgn0266993	1.08458	0.317083	0.0600252	CR45444
FBgn0029660	1.59902	0.317083	0.0601632	CG10801
FBgn0010812	-0.224625	0.317083	0.0601701	unc-45
FBgn0031694	1.42878	0.317083	0.0601745	Cyp4ac2
FBgn0003301	-0.603142	0.317083	0.0602029	rut
FBgn0052971	1.21608	0.317083	0.0602078	CG32971
FBgn0000477	-1.11564	0.317083	0.06023	DNaseII
FBgn0015019	-0.290803	0.317083	0.0602462	Cctgamma
FBgn0040507	1.71813	0.317083	0.0602734	ACXD
FBgn0052845	0.246283	0.317083	0.0602888	CG32845
FBgn0261245	-0.323713	0.317083	0.0602904	sing
FBgn0014028	-0.286299	0.317163	0.0603606	SdhB
FBgn0000451	0.579683	0.317163	0.0604126	ect
FBgn0038810	-0.251377	0.317163	0.0604276	Srp72
FBgn0000594	0.678703	0.317163	0.060465	Est-P
FBgn0027279	-0.287073	0.317163	0.0604829	l(1)G0196
FBgn0028509	-0.266028	0.317477	0.0605956	CenG1A
FBgn0038341	-1.31176	0.317477	0.0606341	AdamTS-A
FBgn0039462	0.501984	0.317477	0.0606493	CG14252
FBgn0015282	-0.294738	0.318025	0.0607895	Rpt2
FBgn0035268	0.248948	0.318235	0.0609022	CG8001
FBgn0264838	1.28558	0.318235	0.0609426	CR44046
FBgn0260639	-0.271048	0.318235	0.0609891	gammaTub23C
FBgn0038897	-0.210079	0.318235	0.0610434	CG5849
FBgn0085236	-0.694723	0.318235	0.0610603	CG34207
FBgn0001134	0.801325	0.318235	0.0610672	Grd
FBgn0013811	1.07602	0.318235	0.0610841	Dhc62B
FBgn0051612	0.527546	0.318235	0.0611142	CG31612
FBgn0034179	0.691891	0.318514	0.0612034	CG6805
FBgn0032048	2.15682	0.318599	0.0612645	Dh31
FBgn0023213	-0.361275	0.318599	0.0613258	eIF4G
FBgn0000286	0.450528	0.318599	0.0613773	Cf2
FBgn0035059	0.22235	0.318599	0.0614016	CG3894
FBgn0259168	0.43445	0.318599	0.0614295	mnb
FBgn0028685	-0.299023	0.318599	0.0614335	Rpt4
FBgn0029799	-0.387872	0.318991	0.0615605	CG15772
FBgn0259113	-0.503129	0.318991	0.0615803	DNApol-alpha180
FBgn0266582	-0.307083	0.319851	0.061782	NDUFS3
FBgn0032935	0.277061	0.321088	0.0620569	Atg18b
FBgn0032236	-0.384489	0.321227	0.0621196	mRpS7
FBgn0051388	0.407333	0.321353	0.0621799	CG31388
FBgn0042101	0.676577	0.321464	0.0622617	CG18744
FBgn0035241	1.71493	0.321464	0.0622734	CG12105
FBgn0031760	0.258092	0.32156	0.0623278	Tsp26A
FBgn0034237	-0.233737	0.321853	0.0624207	eIF3-S9
FBgn0038251	-0.291502	0.322195	0.062523	Hexim
FBgn0037751	0.920788	0.322476	0.0626135	topi
FBgn0035521	1.86292	0.322541	0.0626946	VhaM9.7-a
FBgn0050496	0.374692	0.322541	0.0626983	CG30496
FBgn0031004	-0.317681	0.32262	0.0627497	CG7992
FBgn0031283	0.864819	0.322732	0.0628075	CG15880
FBgn0264744	0.534923	0.323046	0.0629047	CG44002
FBgn0087013	-0.210122	0.323454	0.0630563	Karybeta3
FBgn0039655	1.09912	0.323454	0.0630803	CG14507
FBgn0011204	-0.48265	0.323454	0.0630993	cue
FBgn0030412	0.380573	0.323454	0.0631483	Tomosyn
FBgn0024320	-0.310552	0.323454	0.063165	Npc1a
FBgn0011259	0.516724	0.323901	0.0632885	Sema-1a
FBgn0030581	0.279446	0.324163	0.0633759	CG14408
FBgn0050495	0.529235	0.324835	0.0635436	CG30495
FBgn0039043	0.989848	0.324913	0.0636088	CG17121
FBgn0037743	0.26296	0.324913	0.0636604	CG8412
FBgn0050394	0.264979	0.324913	0.0636679	CG30394
FBgn0030871	-0.368066	0.325192	0.0637722	CG8142
FBgn0035852	0.86199	0.325192	0.0638385	CG7387
FBgn0032421	-0.572667	0.325192	0.0638517	crok
FBgn0054007	-0.990247	0.325192	0.0638951	CG34007
FBgn0052243	-0.239033	0.325192	0.0639042	CG32243
FBgn0260407	-0.414324	0.325537	0.0640339	mRpS23
FBgn0038196	-0.372143	0.325537	0.0640449	CG9922
FBgn0011770	-0.358459	0.325602	0.064123	Gip
FBgn0030997	0.760364	0.325602	0.0641834	CG7990
FBgn0051363	0.497874	0.325602	0.0642742	Jupiter
FBgn0264439	1.57367	0.325602	0.0642966	CR43857
FBgn0040233	-0.43807	0.325602	0.0642986	cana
FBgn0032840	2.49327	0.325602	0.0642991	sNPF
FBgn0033354	-0.442595	0.325602	0.0643399	FANCI
FBgn0033879	-0.279275	0.325602	0.0643487	CG6543
FBgn0039733	0.288967	0.325664	0.0643974	CG11504
FBgn0032749	2.2689	0.325856	0.0644917	Phlpp
FBgn0086613	0.304789	0.325856	0.0645083	Ino80
FBgn0027525	-0.268765	0.325935	0.0645691	CG7686
FBgn0035518	0.457662	0.325935	0.0645967	CG15011
FBgn0033740	-0.467449	0.325961	0.0646383	dgt5
FBgn0032244	-0.920417	0.326124	0.06473	RfC3
FBgn0038548	0.420769	0.326124	0.0647436	CG17806
FBgn0000100	-0.381696	0.326232	0.0648015	RpLP0
FBgn0024227	-0.713345	0.326739	0.0649708	aurB
FBgn0033502	0.38118	0.326739	0.0649753	CG12910
FBgn0038307	-0.482425	0.326866	0.065037	mRpS10
FBgn0263697	-0.305671	0.326915	0.0650833	Uba3
FBgn0259148	-2.30514	0.327081	0.0651611	CG42263
FBgn0027552	-0.260459	0.327081	0.0651895	CG10863
FBgn0085419	1.94413	0.327566	0.0653228	Rgk2
FBgn0004363	-0.258841	0.327649	0.0654309	porin
FBgn0027497	-0.236986	0.327649	0.0654789	Madm
FBgn0038640	0.301994	0.327649	0.0654884	CG7706
FBgn0029687	-0.180857	0.327649	0.0655184	Vap-33A
FBgn0037633	-0.29365	0.327649	0.0655224	CG9839
FBgn0032030	-0.345709	0.328017	0.0656328	Wdr82
FBgn0002641	0.380421	0.328247	0.0657154	mal
FBgn0050008	0.664378	0.328692	0.0658413	CG30008
FBgn0031850	2.19103	0.329035	0.0659467	Tsp
FBgn0015024	-0.184219	0.32906	0.0659886	CkIalpha
FBgn0035770	0.221498	0.329353	0.0661073	pst
FBgn0034663	0.885277	0.329353	0.0661473	CG4363
FBgn0037504	-0.303979	0.329353	0.0661577	CG1142
FBgn0033520	0.502307	0.329609	0.0662741	Prx2540-1
FBgn0004389	1.86285	0.329609	0.0662829	bnk
FBgn0036460	-0.308124	0.330288	0.0664563	CG5114
FBgn0031910	2.16624	0.330367	0.066538	CG15818
FBgn0263093	-0.728986	0.330367	0.0665893	CR43361
FBgn0003483	0.669362	0.330367	0.0665914	spn-E
FBgn0025185	0.328088	0.330367	0.06662	az2
FBgn0038319	-0.443551	0.330472	0.0666781	mRpL9
FBgn0037834	-0.273793	0.330683	0.0667725	Art1
FBgn0038960	1.1822	0.330683	0.0667947	CG13855
FBgn0261119	-0.192874	0.330768	0.0668487	Prp19
FBgn0037719	0.351709	0.331833	0.0671011	bocksbeutel
FBgn0031351	0.585939	0.332139	0.0672086	CG14352
FBgn0038262	-1.08671	0.332139	0.0672616	CG14857
FBgn0031002	2.27755	0.332139	0.067294	CG14196
FBgn0062449	0.23968	0.332139	0.0673269	CG13197
FBgn0266409	0.301303	0.332139	0.0673486	CG45049
FBgn0036990	-0.326857	0.332248	0.0674078	mRpL15
FBgn0262124	-0.204392	0.332685	0.0675348	uex
FBgn0031034	1.25526	0.332685	0.0675708	CG14205
FBgn0036623	-0.254871	0.332732	0.0676176	CG4729
FBgn0004861	0.463907	0.333124	0.0677346	ph-p
FBgn0002914	-0.191844	0.333284	0.0678729	Myb
FBgn0035848	0.303305	0.333284	0.0679511	CG7979
FBgn0038106	-0.253644	0.333284	0.0679978	CG7488
FBgn0016691	-0.403822	0.333284	0.0680436	Oscp
FBgn0050410	-0.287733	0.333284	0.0680805	Rpi
FBgn0010382	-0.520493	0.333284	0.0680983	CycE
FBgn0046706	-0.295189	0.333284	0.0681034	Haspin
FBgn0003714	-0.388757	0.333284	0.0681218	tko
FBgn0035203	-0.303758	0.333284	0.0681481	CG9149
FBgn0031171	-0.401639	0.333284	0.0681654	CG1801
FBgn0065099	0.725854	0.333284	0.0681768	snRNA:7SK
FBgn0003330	-0.268999	0.333325	0.0682225	Sce
FBgn0003459	0.316871	0.333477	0.0683202	stwl
FBgn0023167	-0.231262	0.333477	0.0683282	SmD3
FBgn0003884	-0.290521	0.333746	0.0684609	alphaTub84B
FBgn0038455	0.451555	0.333746	0.06853	CG14907
FBgn0034063	0.306838	0.333746	0.0685309	CG8389
FBgn0039488	0.345572	0.333746	0.0685552	CG6066
FBgn0261794	-0.275355	0.333746	0.0685697	kcc
FBgn0051469	0.853239	0.334514	0.0687883	CG31469
FBgn0028497	0.194238	0.334514	0.0688023	CG3530
FBgn0038921	1.21238	0.334661	0.0689046	CG6332
FBgn0052533	0.283737	0.334661	0.0689075	CG32533
FBgn0039326	0.834324	0.334963	0.069007	CG10562
FBgn0035390	-0.193116	0.33505	0.0690624	scramb2
FBgn0051191	2.25539	0.335756	0.0692546	CG31191
FBgn0035405	-0.334565	0.335756	0.069283	pfk
FBgn0028919	0.284493	0.335921	0.0693582	CG16865
FBgn0019624	-0.371283	0.335921	0.0693921	CoVa
FBgn0033061	1.1876	0.336264	0.0695005	CG14590
FBgn0264953	-0.534845	0.336301	0.0695458	Piezo
FBgn0030954	1.92579	0.336986	0.0697531	CCKLR-17D3
FBgn0032857	1.68775	0.336986	0.0697628	CG10947
FBgn0042105	0.3456	0.337061	0.069816	CG18748
FBgn0267278	-0.371064	0.337352	0.0699753	CR45714
FBgn0266752	0.71457	0.337352	0.0699805	CR45225
FBgn0032635	-0.332794	0.337352	0.0699894	CG15141
FBgn0033153	0.500581	0.337553	0.0700706	Gadd45
FBgn0038198	1.78317	0.337553	0.0701065	Npc2b
FBgn0040959	1.3431	0.337612	0.0701565	Peritrophin-15a
FBgn0034215	-0.295763	0.337934	0.0702612	Mtap
FBgn0002609	0.284368	0.339202	0.0705629	E(spl)m3-HLH
FBgn0260386	1.39152	0.339601	0.0706838	mtg
FBgn0010622	-0.275893	0.339874	0.0707786	l(2)06496
FBgn0010339	-0.29837	0.340102	0.0708971	128up
FBgn0039930	-0.468618	0.340102	0.0709022	CG11077
FBgn0032516	0.272235	0.341217	0.0711727	CG9293
FBgn0031252	-0.645116	0.342099	0.0714614	CG13690
FBgn0263120	0.31526	0.342099	0.0715421	Acsl
FBgn0039187	0.277188	0.342099	0.0715538	CG6454
FBgn0263005	-0.300553	0.342099	0.0715595	CG43313
FBgn0030737	0.898678	0.342099	0.0715787	CG9914
FBgn0040305	0.239616	0.342099	0.0716073	MTF-1
FBgn0037108	-0.208686	0.342099	0.0716244	CG11306
FBgn0002021	-0.249224	0.342424	0.0717307	l(2)37Bb
FBgn0024986	-0.349434	0.34302	0.0719118	CG3719
FBgn0039016	0.620594	0.34302	0.0719464	Dcr-1
FBgn0035471	-0.301013	0.34302	0.0719706	Sc2
FBgn0024251	1.47373	0.343216	0.07205	bbx
FBgn0036934	2.47346	0.343303	0.0721066	sNPF-R
FBgn0050154	-0.542245	0.343434	0.0721727	CG30154
FBgn0040078	-0.301872	0.343601	0.0722708	pont
FBgn0028327	0.232431	0.343601	0.0723075	l(1)G0320
FBgn0028546	-0.23558	0.343601	0.0723228	ics
FBgn0266672	0.224774	0.344347	0.0725184	Sec8
FBgn0030943	-0.403938	0.344416	0.0725722	CG6540
FBgn0029831	1.58418	0.344416	0.0726513	CG5966
FBgn0001225	-0.969154	0.344416	0.0726608	Hsp26
FBgn0004198	2.0936	0.344416	0.0727228	ct
FBgn0032329	-0.545984	0.344416	0.0727253	Art8
FBgn0041087	0.318121	0.344487	0.0727789	wun2
FBgn0042125	0.570242	0.345497	0.0730309	CG18787
FBgn0033541	1.24622	0.346224	0.0732233	CG12934
FBgn0045073	-0.189092	0.346368	0.0732925	Stim
FBgn0034951	0.351827	0.346429	0.0733442	CG3860
FBgn0004177	-0.199602	0.346532	0.0734108	mts
FBgn0085298	1.16761	0.346532	0.0734435	CG34269
FBgn0000173	-0.198444	0.347069	0.0735959	ben
FBgn0028500	0.383744	0.347474	0.0737208	Rich
FBgn0039691	-0.224306	0.34774	0.0738161	IntS11
FBgn0260972	-0.277852	0.347772	0.0738633	alc
FBgn0033890	-0.691614	0.347772	0.0739188	Ctf4
FBgn0030208	-0.205182	0.347772	0.0739395	PPP4R2r
FBgn0014135	0.704777	0.34778	0.0739801	bnl
FBgn0260855	0.335544	0.348117	0.0740906	Sec22
FBgn0033304	-0.24732	0.348278	0.0741943	Cyp6a13
FBgn0264823	-0.455225	0.348278	0.0742028	CR44031
FBgn0266313	1.75711	0.348666	0.0743244	CR44978
FBgn0061492	-0.325262	0.348742	0.0743796	loj
FBgn0038376	0.279689	0.348782	0.074427	Hmt-1
FBgn0031604	-0.203161	0.348924	0.0744964	Elp3
FBgn0261503	0.49121	0.349141	0.0745818	CR42651
FBgn0002921	-0.243964	0.349222	0.0746382	Atpalpha
FBgn0029508	-0.303682	0.349584	0.0747674	Tsp42Ea
FBgn0037873	-0.421066	0.349584	0.0748788	SdhC
FBgn0034245	-0.484808	0.349584	0.0748813	CG14482
FBgn0010431	1.69427	0.349584	0.0750221	mtrm
FBgn0030996	0.190879	0.349584	0.0750531	CG14194
FBgn0025366	-0.411386	0.349584	0.0750578	Ip259
FBgn0052813	0.318918	0.349584	0.075086	CG32813
FBgn0052476	-0.204399	0.349584	0.0750941	mthl14
FBgn0035464	0.286666	0.349584	0.0751092	CG12006
FBgn0015527	-0.221936	0.349584	0.0751431	pen
FBgn0261788	0.839164	0.349584	0.0751453	Ank2
FBgn0039830	-0.322216	0.350018	0.0752778	CG1746
FBgn0041191	-0.295335	0.350142	0.0753751	Rheb
FBgn0029529	-0.508669	0.350142	0.0754136	CG13365
FBgn0051704	1.68168	0.350142	0.0755059	CG31704
FBgn0262871	0.272138	0.350142	0.075527	lute
FBgn0086904	-0.347131	0.350142	0.0755376	Nacalpha
FBgn0003328	-0.24347	0.350142	0.0755392	scb
FBgn0031752	0.303371	0.35095	0.0757529	CG9044
FBgn0026431	-0.313926	0.351406	0.0759266	Grip75
FBgn0036889	-0.382524	0.351406	0.0759569	CG14100
FBgn0259742	0.327221	0.351406	0.0760031	CG42360
FBgn0039139	0.355307	0.351406	0.0760084	Ime4
FBgn0023536	0.52263	0.351653	0.0761011	CG3156
FBgn0023076	0.262646	0.351663	0.0761426	Clk
FBgn0011708	0.178962	0.352689	0.0764143	Syx5
FBgn0263451	-1.19505	0.352689	0.0764435	CR43474
FBgn0263747	0.875717	0.352886	0.0765257	CG43672
FBgn0002791	0.30038	0.352945	0.0765779	mr
FBgn0033113	0.297506	0.352948	0.0766355	Spn42Dc
FBgn0039929	-0.23175	0.352948	0.0766574	CG11076
FBgn0038811	-0.414219	0.353206	0.0767754	CG4159
FBgn0031356	-0.223496	0.353206	0.0767924	CG17660
FBgn0037619	0.427802	0.354277	0.0770649	CG8159
FBgn0261562	0.242701	0.354622	0.0771796	CG42676
FBgn0035032	-0.390386	0.355122	0.0773551	CG4692
FBgn0020305	-0.408322	0.355122	0.0773678	dbe
FBgn0037918	0.398465	0.355405	0.0774692	CG6791
FBgn0000633	0.951624	0.356329	0.0777867	fas
FBgn0038143	1.14883	0.356329	0.0778146	CG9813
FBgn0027608	0.65334	0.356329	0.0778298	CG2082
FBgn0086346	-0.185345	0.356329	0.0778665	ALiX
FBgn0031256	0.405862	0.356329	0.0779023	CG4164
FBgn0051233	-1.09297	0.356329	0.0779735	CG31233
FBgn0015324	-0.182271	0.356329	0.0780144	Vha26
FBgn0035761	-0.32123	0.356329	0.0780586	RhoGEF4
FBgn0259243	-0.192039	0.356329	0.0780618	Pka-R1
FBgn0031779	0.264626	0.356329	0.078069	CG9175
FBgn0259175	0.543576	0.356454	0.0781438	ome
FBgn0267485	0.213264	0.356454	0.0781951	CR45835
FBgn0266700	-0.324955	0.356454	0.0782158	CR45190
FBgn0038261	1.20636	0.356503	0.0783195	CG14856
FBgn0250785	-0.518258	0.356503	0.0783394	vari
FBgn0053140	1.12744	0.356503	0.0784251	CG33140
FBgn0033897	0.194203	0.356503	0.078433	Rcd1
FBgn0013576	-0.265059	0.356503	0.0784389	mtd
FBgn0037354	0.33071	0.356503	0.0784658	CG12171
FBgn0031148	0.314412	0.357008	0.0786381	Cbs
FBgn0015541	-0.238719	0.357008	0.0786696	sda
FBgn0026598	0.351254	0.357008	0.0787071	Apc2
FBgn0023509	-0.276433	0.357008	0.0787366	mip130
FBgn0032780	-1.47578	0.357099	0.0787964	CG13085
FBgn0033494	0.242032	0.357211	0.0788858	KCNQ
FBgn0034618	0.635914	0.357211	0.0789011	CG9485
FBgn0050062	1.18369	0.3573	0.0789666	CG30062
FBgn0036286	0.216469	0.3573	0.0790118	CG10616
FBgn0032790	-0.378221	0.3573	0.0791093	CG10194
FBgn0010258	1.1105	0.3573	0.0791197	Rbp4
FBgn0029821	1.13106	0.3573	0.0791205	CG4020
FBgn0032235	0.17958	0.358201	0.0793599	CG5096
FBgn0027657	-0.32843	0.358211	0.0794023	glob1
FBgn0267505	-1.40046	0.358961	0.0796087	pre-rRNA:CR45845
FBgn0034002	0.316302	0.359101	0.0796797	CG8079
FBgn0011573	-0.255527	0.359808	0.079877	Cdc37
FBgn0031491	0.240523	0.359937	0.0799587	alpha4GT1
FBgn0040388	-0.289935	0.359937	0.0799862	boi
FBgn0036896	0.591654	0.359937	0.0800263	wnd
FBgn0069913	1.30761	0.36015	0.0801139	CG4681
FBgn0024887	-0.286021	0.360778	0.0803138	kin17
FBgn0250814	-0.252483	0.360778	0.0803342	CG4169
FBgn0014020	-0.18201	0.361084	0.0804631	Rho1
FBgn0032850	0.940673	0.361084	0.080483	Kua
FBgn0031040	-0.342551	0.362892	0.0809267	CG14210
FBgn0030004	0.29216	0.363083	0.081033	CG10958
FBgn0027548	-0.275201	0.363083	0.0810503	nito
FBgn0264947	-0.238717	0.363262	0.0811613	CR44116
FBgn0083027	0.405641	0.363262	0.0811716	snoRNA:Psi18S-531
[truncated: 15,560 more rows]

## Sheet: Geriatric vs Young p<0.05
annotation_name	logFC	p	pval	symbol
FBgn0033926	2.0663	0.000103048	1.15189e-08	Arc1
FBgn0262854	-2.54785	0.000166765	5.11955e-08	CG43218
FBgn0031490	2.10416	0.000166765	5.5924e-08	CG17264
FBgn0261089	3.9061	0.000181548	8.93191e-08	Sytalpha
FBgn0262620	3.47966	0.000181548	1.27642e-07	CR43144
FBgn0015038	1.52995	0.000181548	1.38239e-07	Cyp9b1
FBgn0038681	1.6287	0.000181548	1.42056e-07	Cyp12a4
FBgn0002735	2.25057	0.000240736	2.28808e-07	E(spl)mgamma-HLH
FBgn0051288	2.16441	0.000240736	2.42189e-07	CG31288
FBgn0003710	2.76763	0.000245868	2.97933e-07	tipE
FBgn0032981	4.49972	0.000245868	3.02319e-07	CG3635
FBgn0051370	1.39159	0.000351522	4.71525e-07	CG31370
FBgn0050090	1.87834	0.000431468	6.26994e-07	CG30090
FBgn0039316	2.2393	0.000528871	8.27655e-07	CG11893
FBgn0030189	1.26934	0.00061323	1.09013e-06	CG2909
FBgn0037525	1.91176	0.00061323	1.09677e-06	CG17816
FBgn0051436	1.58927	0.000620054	1.17828e-06	CG31436
FBgn0029766	0.882509	0.000698152	1.40473e-06	CG15784
FBgn0033928	1.21151	0.000734624	1.56023e-06	Arc2
FBgn0034639	1.39665	0.000739708	1.65372e-06	CG15673
FBgn0025641	-1.76964	0.000750057	1.84085e-06	DAAM
FBgn0029710	2.0316	0.000750057	1.84454e-06	CG3568
FBgn0040837	1.38228	0.000839318	2.20933e-06	CG8620
FBgn0040726	2.71053	0.000839318	2.25169e-06	dpr
FBgn0025525	2.25739	0.000875772	2.44738e-06	bab2
FBgn0039319	1.81386	0.000944404	2.74475e-06	CG13659
FBgn0034480	1.5886	0.000955571	2.89952e-06	CG16898
FBgn0030607	2.72932	0.000955571	2.99083e-06	dob
FBgn0026592	2.24479	0.00121737	4.02609e-06	Fie
FBgn0086254	-0.882335	0.00121737	4.20013e-06	CG6084
FBgn0031516	0.914391	0.00121737	4.21847e-06	CG9663
FBgn0030367	-4.25789	0.00125748	4.67005e-06	Cyp311a1
FBgn0010041	1.90087	0.00125748	4.71305e-06	GstD5
FBgn0036742	1.57733	0.00125748	4.77917e-06	CG7497
FBgn0003944	1.58866	0.00138738	5.42792e-06	Ubx
FBgn0002985	1.24961	0.00159828	6.43173e-06	odd
FBgn0000489	6.43356	0.00178791	7.51475e-06	Pka-C3
FBgn0032297	-1.03155	0.00178791	7.59452e-06	CG17124
FBgn0028990	1.37275	0.00191443	8.37576e-06	Spn27A
FBgn0031805	1.02561	0.00191443	8.55993e-06	CG9505
FBgn0035167	3.24885	0.00194335	8.9065e-06	Gr61a
FBgn0040360	1.12834	0.00211167	9.91393e-06	CG14626
FBgn0028424	0.997536	0.0021551	1.0418e-05	JhI-26
FBgn0035266	0.875405	0.0021551	1.05996e-05	Gk
FBgn0063494	1.37562	0.00217587	1.0945e-05	GstE6
FBgn0031489	1.1631	0.00232747	1.19678e-05	CG17224
FBgn0264987	2.80635	0.00420646	2.20997e-05	CR44138
FBgn0261363	2.22158	0.004594	2.55037e-05	PPO3
FBgn0015399	3.19944	0.004594	2.55185e-05	kek1
FBgn0026718	-0.9405	0.004594	2.59972e-05	fu12
FBgn0014018	0.807336	0.004594	2.61898e-05	Rel
FBgn0003187	3.93901	0.00523775	3.09946e-05	qua
FBgn0030723	2.43138	0.00523775	3.10307e-05	dpr18
FBgn0033188	-0.901671	0.00574598	3.4684e-05	Drat
FBgn0031643	0.914376	0.00584806	3.59539e-05	CG3008
FBgn0050414	0.777051	0.00605649	3.79123e-05	CG30414
FBgn0013323	1.83692	0.00618693	3.94798e-05	Ptth
FBgn0262476	2.01934	0.00618693	4.07685e-05	CG43066
FBgn0031322	0.741869	0.00618693	4.09939e-05	CG5001
FBgn0030778	1.27481	0.00618693	4.14952e-05	CG4678
FBgn0263974	4.57217	0.00625465	4.26485e-05	qin
FBgn0016131	-0.791521	0.00647821	4.50349e-05	Cdk4
FBgn0063493	1.30233	0.00647821	4.56212e-05	GstE7
FBgn0039818	-0.64731	0.00723904	5.17883e-05	CG11318
FBgn0014469	1.13455	0.00730803	5.31804e-05	Cyp4e2
FBgn0260755	1.0591	0.00730803	5.39157e-05	CG42553
FBgn0034647	0.778936	0.00743519	5.56927e-05	pirk
FBgn0262366	1.90569	0.00743519	5.65161e-05	CG43064
FBgn0263981	1.14168	0.00780626	6.07415e-05	CR43730
FBgn0261041	4.4049	0.00780626	6.10818e-05	stj
FBgn0010247	-0.66811	0.00786653	6.24327e-05	Parp
FBgn0039315	1.89456	0.00787519	6.33818e-05	CG13658
FBgn0033221	1.40003	0.00822702	6.72958e-05	CG12825
FBgn0010225	-1.47305	0.00822702	6.94214e-05	Gel
FBgn0262742	3.3133	0.00822702	6.95281e-05	Fas1
FBgn0060296	-0.624465	0.00822702	6.98919e-05	pain
FBgn0052625	3.56285	0.00859069	7.39418e-05	CG32625
FBgn0262636	-3.09399	0.00862528	7.52037e-05	Lin29
FBgn0036502	0.809916	0.00934106	8.25654e-05	CG7841
FBgn0037844	2.05541	0.00934106	8.35329e-05	CG4570
FBgn0041182	1.08035	0.00970677	8.78882e-05	Tep2
FBgn0003450	2.00419	0.009784	8.96812e-05	snk
FBgn0264960	3.0364	0.0103694	9.66552e-05	CR44129
FBgn0034067	0.955095	0.0103694	9.7485e-05	CG8399
FBgn0010042	3.81326	0.0103694	9.94113e-05	GstD6
FBgn0063497	1.16705	0.0103694	0.000100054	GstE3
FBgn0019650	3.15845	0.0103694	0.000100842	toy
FBgn0038953	0.907979	0.0105501	0.00010436	CG18596
FBgn0038476	-0.861066	0.0105501	0.000104958	kuk
FBgn0027660	1.26487	0.0106397	0.000107039	blot
FBgn0038292	1.11267	0.0106609	0.000108444	CG3987
FBgn0050022	1.13546	0.0110669	0.000113811	CG30022
FBgn0041184	-0.852708	0.0111343	0.000115749	Socs36E
FBgn0267348	-0.649242	0.011601	0.000121897	LanB2
FBgn0034861	2.69073	0.0118381	0.000126092	CG9815
FBgn0037623	1.24613	0.0118381	0.000127035	CG9801
FBgn0035300	4.38247	0.0118654	0.000129227	CG1139
FBgn0011676	3.69249	0.0118654	0.000129981	Nos
FBgn0261113	0.772047	0.0122238	0.000135908	Xrp1
FBgn0038804	0.804768	0.0122238	0.00013664	CG10877
FBgn0027550	1.2191	0.0124775	0.000140871	CG6495
FBgn0038440	1.71069	0.0130657	0.000148972	Gr89a
FBgn0063492	1.74496	0.0130725	0.00015051	GstE8
FBgn0032629	3.24963	0.0132708	0.000154277	beat-IIIc
FBgn0037391	0.764505	0.0137378	0.000162219	CG2017
FBgn0038720	1.25262	0.0137378	0.000163744	CG6231
FBgn0038842	1.21027	0.0137378	0.000164469	hdly
FBgn0033889	0.540888	0.0137378	0.000166913	CG6701
FBgn0027280	0.520879	0.0137378	0.000167385	l(1)G0193
FBgn0264979	1.2512	0.013881	0.00017068	CG4267
FBgn0040056	-0.549597	0.0139288	0.000173402	CG17698
FBgn0051097	3.58668	0.0139288	0.000174383	CG31097
FBgn0033875	0.74656	0.0143877	0.000181735	CG6357
FBgn0051098	1.18676	0.0150421	0.000191683	CG31098
FBgn0004635	1.49334	0.0152385	0.000195915	rho
FBgn0037906	1.14137	0.0152385	0.000197593	PGRP-LB
FBgn0004892	0.948184	0.0154376	0.000205108	sob
FBgn0264815	3.20367	0.0154376	0.000205449	Pde1c
FBgn0086251	1.14509	0.0154376	0.000209782	del
FBgn0035806	1.32977	0.0154376	0.000209824	PGRP-SD
FBgn0039644	1.95821	0.0154376	0.000209975	CG11897
FBgn0040256	1.12888	0.0154376	0.000210529	Ugt86Dd
FBgn0038498	0.660626	0.0157249	0.000216204	beat-IIa
FBgn0036993	1.03511	0.015745	0.00021824	CG5910
FBgn0004893	-1.25025	0.0160528	0.000224302	bowl
FBgn0260482	2.86319	0.0160528	0.000226095	CG32599
FBgn0034950	2.04073	0.0161274	0.000228994	Pask
FBgn0038083	3.23723	0.0161274	0.000230752	CG5999
FBgn0039201	4.26519	0.0164245	0.000236839	CG13617
FBgn0000404	-0.555769	0.0167147	0.000245597	CycA
FBgn0030976	1.24534	0.0167147	0.000247757	CG7378
FBgn0013995	-0.842218	0.0167147	0.000248996	Calx
FBgn0031317	0.583182	0.0167147	0.000249118	CG5118
FBgn0037630	4.87216	0.0167147	0.000250365	Ir85a
FBgn0050456	0.827144	0.0169997	0.000256535	CG30456
FBgn0266581	-0.54261	0.0171198	0.00026026	pit
FBgn0052368	1.64143	0.0176302	0.000272735	CG32368
FBgn0019661	2.42371	0.0176302	0.000274875	roX1
FBgn0034396	2.46282	0.0176302	0.000275107	CG15097
FBgn0033453	0.549903	0.0176302	0.000275902	CG1667
FBgn0033226	0.512412	0.0179165	0.000282386	CG1882
FBgn0031417	0.658966	0.0181357	0.000287868	CG3597
FBgn0264006	4.54289	0.018177	0.000290556	dysc
FBgn0030796	4.22701	0.0181939	0.00029286	CG4829
FBgn0266417	-1.23616	0.0183032	0.000297794	CG45057
FBgn0012036	-0.612283	0.0183032	0.00030039	Aldh
FBgn0037563	3.53139	0.0183032	0.000300757	CG11672
FBgn0005612	0.669474	0.0189583	0.000313641	Sox14
FBgn0051248	1.21236	0.0194192	0.000323436	CG31248
FBgn0035287	-1.59434	0.0194595	0.000326282	CG13937
FBgn0010038	1.73406	0.0194757	0.000328732	GstD2
FBgn0040251	0.61955	0.0198402	0.000337101	Ugt86Di
FBgn0050484	1.88324	0.0202428	0.000346205	CG30484
FBgn0038473	-0.506879	0.020288	0.000349245	Ns1
FBgn0053494	4.20499	0.0202895	0.00035154	CG33494
FBgn0260768	1.38078	0.0205736	0.000359558	CG42566
FBgn0034756	2.09906	0.0205736	0.000362423	Cyp6d2
FBgn0035861	1.09162	0.0205736	0.000363361	CG7213
FBgn0026403	4.34008	0.0207355	0.000368538	Ndg
FBgn0023525	1.23335	0.0214294	0.000383267	CG3191
FBgn0034399	-0.912614	0.0214654	0.000386311	CG15083
FBgn0034156	1.4888	0.0215539	0.000390312	CG5348
FBgn0030309	-0.810104	0.0215542	0.000392727	CG1572
FBgn0033174	0.750723	0.0233339	0.000427763	CG11125
FBgn0032946	1.24358	0.0238402	0.000439709	nrv3
FBgn0016983	-0.405562	0.0243094	0.000451431	smid
FBgn0086898	1.61892	0.0243094	0.000453798	dgo
FBgn0004108	0.874033	0.0243945	0.000458113	Nrt
FBgn0030237	-1.14926	0.0244944	0.000462726	CG15209
FBgn0261989	4.43008	0.024509	0.000465743	CG42807
FBgn0265759	1.32317	0.0252659	0.000486815	CR44566
FBgn0002023	0.733633	0.0252659	0.000487773	Lim3
FBgn0051431	-0.986967	0.0252659	0.000488598	CG31431
FBgn0039282	4.29733	0.0267417	0.000520127	Bili
FBgn0034390	-0.74272	0.0269494	0.000529187	CG15093
FBgn0010105	-1.12661	0.0269494	0.000530192	comm
FBgn0033446	-0.503915	0.0269505	0.000533225	CG1648
FBgn0265510	3.75121	0.0273326	0.000543842	CR44372
FBgn0015039	1.07586	0.0280099	0.000560448	Cyp9b2
FBgn0000355	3.64789	0.0281337	0.00056607	Cp15
FBgn0040351	2.10259	0.0282254	0.000573379	CG11638
FBgn0034047	1.9927	0.0282254	0.000574226	CG12970
FBgn0051619	3.97128	0.0285875	0.00058664	CG31619
FBgn0035246	1.40215	0.0285875	0.000587992	CG13928
FBgn0038088	1.03555	0.0285875	0.000591179	CG10126
FBgn0011822	1.42667	0.0289591	0.000602277	pcl
FBgn0023416	0.93627	0.0289591	0.000606194	Ac3
FBgn0004364	-0.933808	0.0289591	0.000609354	18w
FBgn0039972	4.45561	0.0289591	0.000611812	CG17018
FBgn0052436	3.78645	0.029042	0.000616809	CG32436
FBgn0052582	2.88719	0.0290889	0.000621057	CR32582
FBgn0036126	0.769909	0.0294711	0.000632511	CG6272
FBgn0027580	-0.664478	0.0300246	0.000647746	CG1516
FBgn0034740	1.69892	0.0304808	0.000660996	nsr
FBgn0262970	0.607921	0.0305083	0.000665003	CR43281
FBgn0003996	-0.489756	0.0310292	0.000679826	w
FBgn0034638	1.43394	0.0318774	0.000701972	CG10433
FBgn0039674	-0.554361	0.0321729	0.000717398	CG1907
FBgn0039927	1.49159	0.0321729	0.000717942	CG11155
FBgn0010482	4.17911	0.0321729	0.00071927	l(2)01289
FBgn0036627	1.21136	0.033044	0.000742436	Grp
FBgn0260657	3.25145	0.0333872	0.000753881	CG42540
FBgn0042104	1.08142	0.0334475	0.000758982	CG18747
FBgn0267733	0.535875	0.0335206	0.000764781	CR46064
FBgn0030294	-0.841409	0.0335206	0.000768133	Pa1
FBgn0039183	-0.438669	0.0336621	0.000780827	Dis3
FBgn0266626	0.70712	0.0336621	0.000784806	CR45133
FBgn0039250	-0.947928	0.0336621	0.000786452	Mink
FBgn0003285	1.48405	0.0336621	0.000786627	rst
FBgn0024244	0.519993	0.0336621	0.00079019	drm
FBgn0026376	0.940396	0.0337459	0.000795929	Rgl
FBgn0003885	-0.519507	0.033908	0.000803542	alphaTub84D
FBgn0029128	1.34522	0.0339413	0.000810639	tyn
FBgn0024920	-1.05188	0.0339413	0.000811921	Ts
FBgn0015351	0.729654	0.0344025	0.000826799	CG14906
FBgn0037552	-0.697429	0.0353498	0.000853515	CG7800
FBgn0035948	2.23013	0.0359009	0.000870836	CG5644
FBgn0034507	2.00131	0.0359137	0.000875161	CG11192
FBgn0032665	-1.36897	0.0359567	0.000880228	CG15152
FBgn0000108	1.76634	0.0364301	0.00089713	Appl
FBgn0052677	3.36294	0.0364301	0.000901606	X11Lbeta
FBgn0033302	0.864414	0.0364301	0.000904033	Cyp6a14
FBgn0040348	0.956802	0.0368998	0.000921759	CG3703
FBgn0050502	0.919897	0.0368998	0.000925133	fa2h
FBgn0040232	-0.858045	0.0368998	0.000928063	cmet
FBgn0267727	-1.15087	0.0370657	0.000936379	Pen
FBgn0004646	1.74874	0.0376475	0.000955286	ogre
FBgn0026878	-1.06733	0.0387135	0.000987645	CG4325
FBgn0038330	1.20645	0.0387135	0.000990988	CG14868
FBgn0025815	-0.602466	0.038783	0.000997105	Mcm6
FBgn0263234	1.40505	0.0388616	0.00100347	Phae1
FBgn0001125	-0.545705	0.0389728	0.00101126	Got2
FBgn0003448	1.49685	0.0389728	0.00101505	sna
FBgn0010263	2.06791	0.039835	0.00104196	Rbp9
FBgn0015372	0.491218	0.0401356	0.00105431	RabX1
FBgn0024947	0.443298	0.0401578	0.00105938	NTPase
FBgn0086687	-0.47815	0.0409759	0.00108809	Desat1
FBgn0000405	-0.77753	0.0409759	0.00109029	CycB
FBgn0014073	2.12652	0.0409759	0.0010947	Tie
FBgn0261385	-0.467736	0.0412777	0.00110997	scra
FBgn0052407	0.560805	0.0412777	0.00111426	CG32407
FBgn0267160	1.22645	0.0412777	0.00111661	CR45600
FBgn0032897	1.80123	0.0418393	0.00113834	CG9336
FBgn0000015	3.75039	0.0418393	0.00114116	Abd-B
FBgn0262353	-0.523116	0.0419526	0.00114894	CR43051
FBgn0037549	-0.380723	0.0420623	0.00115664	CG7878
FBgn0033134	-0.607167	0.0421912	0.0011649	Tsp42El
FBgn0038475	0.766216	0.0422726	0.00117187	Keap1
FBgn0038014	1.79845	0.0423266	0.00118171	CG10041
FBgn0030993	0.596332	0.0423266	0.00118284	Mec2
FBgn0029838	1.35599	0.0425356	0.00119343	CG4666
FBgn0031968	-0.594252	0.0429192	0.00121005	CG7231
FBgn0039266	-0.399573	0.0429192	0.00121379	CG11791
FBgn0058160	-0.890848	0.0431116	0.00122405	CG40160
FBgn0034694	0.532965	0.0432869	0.00123387	CG6613
FBgn0032050	-0.467587	0.0433318	0.00124203	CG13096
FBgn0040493	-0.502158	0.0433318	0.00124483	grsm
FBgn0033177	0.477189	0.0434609	0.0012534	CG11141
FBgn0028427	-0.446153	0.043667	0.00126893	Ilk
FBgn0003390	0.571553	0.043667	0.00126911	shf
FBgn0085434	-0.525274	0.0439844	0.00128325	NaCP60E
FBgn0003502	0.764366	0.0442756	0.00129799	Btk29A
FBgn0025630	0.526339	0.0442756	0.00130164	CG4061
FBgn0031418	0.406363	0.0445718	0.00131533	CG3609
FBgn0027932	-0.582194	0.0445763	0.00132045	Akap200
FBgn0011648	-0.464088	0.0449561	0.00133672	Mad
FBgn0035876	0.534062	0.0449864	0.0013456	Pex2
FBgn0261873	1.18408	0.0449864	0.00134768	sdt
FBgn0250876	-0.889413	0.0454057	0.00136532	Sema-5c
FBgn0030529	-0.434205	0.046006	0.00139152	Clic
FBgn0035499	-0.467788	0.046006	0.00139365	Chd64
FBgn0034403	2.21279	0.0461835	0.00140419	CG18190
FBgn0033945	1.17998	0.0463343	0.00141788	CG12868
FBgn0038964	-0.495896	0.0463343	0.00141914	Nop56
FBgn0262580	1.58307	0.0463963	0.00143038	CG43120
FBgn0030720	-0.422761	0.0463963	0.0014326	CG8939
FBgn0052103	0.49574	0.0463963	0.00144065	CG32103
FBgn0035057	2.00699	0.0463963	0.00145014	CG3880
FBgn0004118	3.15345	0.0463963	0.0014513	nAChRbeta2
FBgn0027601	1.05083	0.0463963	0.00145698	pdgy
FBgn0037560	2.51216	0.0463963	0.00145734	CR18228
FBgn0264745	1.85039	0.0480507	0.00151468	CR44003
FBgn0031461	2.22792	0.0480738	0.00152078	daw
FBgn0045064	1.23436	0.0488841	0.00155208	bwa
FBgn0014343	1.33603	0.0488841	0.00155945	mirr
FBgn0010397	-0.515268	0.0488841	0.00156281	LamC
FBgn0051875	1.13842	0.0492646	0.00158387	CG31875
FBgn0262509	3.07086	0.0492646	0.00159457	nrm
FBgn0026593	0.636834	0.0492646	0.00159548	CG5707
FBgn0029526	0.785602	0.0492646	0.001597	CR18166
FBgn0039525	2.50033	0.0493084	0.00160393	CG5646
FBgn0263415	2.76998	0.0493335	0.00161026	CR43461
FBgn0032264	1.58905	0.0498654	0.00163678	Lip4
FBgn0032929	-1.50994	0.0498654	0.00164156	Mcm10
FBgn0015801	0.742863	0.0498654	0.00164434	Reg-5
