# Supplementary material for: Age-related changes in polycomb gene regulation disrupt lineage fidelity in intestinal stem cells
Source: eLife. 2021 Mar 16;10:e62250. doi: 10.7554/eLife.62250 (PMC7984841; doi:10.7554/eLife.62250)
Supplement: Supplementary file 3. — Related to Figure 1. Significantly differentially regulated genes at mRNA and chromatin levels across aged time-points in ISCs. [file elife-62250-supp3.xlsx]

## Sheet: Sheet1
seqnames	start	end	ID	symbol	description	Trl/z?
chrX	530501	579044	FBgn0000108	Appl	beta amyloid protein precursor-like [Source:FlyBase;Acc:FBgn0000108]	Yes
3L	4188499	4193788	FBgn0003710	tipE	temperature-induced paralytic E [Source:FlyBase;Acc:FBgn0003710]	No
chrX	2790599	2796466	FBgn0003996	w	white [Source:FlyBase;Acc:FBgn0003996]	No
2L	3771700	3784121	FBgn0004893	bowl	brother of odd with entrails limited [Source:FlyBase;Acc:FBgn0004893]	Yes
3L	15721511	15728430	FBgn0010105	comm	commissureless [Source:FlyBase;Acc:FBgn0010105]	Yes
3R	4235217	4241057	FBgn0010225	Gel	Gelsolin [Source:FlyBase;Acc:FBgn0010225]	Yes
2R	14570810	14575771	FBgn0010397	LamC	Lamin C [Source:FlyBase;Acc:FBgn0010397]	No
chrX	436139	437448	FBgn0011822	pcl	pepsinogen-like [Source:FlyBase;Acc:FBgn0011822]	Yes
3L	12693639	12710249	FBgn0014343	mirr	mirror [Source:FlyBase;Acc:FBgn0014343]	Yes
3L	17396031	17421514	FBgn0027660	blot	bloated tubules [Source:FlyBase;Acc:FBgn0027660]	Yes
chrX	16063738	16070304	FBgn0030723	dpr18	dpr18 [Source:FlyBase;Acc:FBgn0030723]	Yes
2L	2370152	2371524	FBgn0031417	CG3597	CG3597, isoform B [Source:UniProtKB/TrEMBL;Acc:M9PE54]	No
2L	3018508	3021506	FBgn0031490	CG17264	Uncharacterized protein, isoform A [Source:UniProtKB/TrEMBL;Acc:Q9VQK3]	No
2L	17187637	17260734	FBgn0032629	beat-IIIc	beat-IIIc [Source:FlyBase;Acc:FBgn0032629]	No
2L	18114547	18115220	FBgn0032665	CG15152	GEO12076p1 [Source:UniProtKB/TrEMBL;Acc:Q9VJA4]	Yes
2L	22175415	22183991	FBgn0032981	CG3635	Lipase [Source:UniProtKB/TrEMBL;Acc:Q9V9N3]	No
2R	9842686	9845512	FBgn0033453	CG1667	CG1667, isoform B [Source:UniProtKB/TrEMBL;Acc:A0A0B4LFY9]	No
2R	14361924	14362825	FBgn0033928	Arc2	Arc2 [Source:FlyBase;Acc:FBgn0033928]	No
2R	21608393	21613071	FBgn0034639	CG15673		Yes
2R	23925236	23926911	FBgn0034931	CG2812	CG2812 [Source:UniProtKB/TrEMBL;Acc:Q9W1G4]	Yes
3L	1876551	1883041	FBgn0035287	CG13937	RH40165p [Source:UniProtKB/TrEMBL;Acc:Q8IRG5]	Yes
3R	20562486	20564067	FBgn0038804	CG10877	LP04613p [Source:UniProtKB/TrEMBL;Acc:Q9VDL4]	Yes
chr4	1126602	1137919	FBgn0039927	CG11155	FI01405p [Source:UniProtKB/TrEMBL;Acc:Q9V4A0]	No
2R	20698483	20750442	FBgn0040726	dpr	defective proboscis extension response [Source:FlyBase;Acc:FBgn0040726]	Yes
2R	17100241	17107542	FBgn0050456	CG30456	Uncharacterized protein, isoform B [Source:UniProtKB/TrEMBL;Acc:A1ZAQ3]	No
2L	21145137	21148546	FBgn0086251	del	deadlock [Source:FlyBase;Acc:FBgn0086251]	Yes
chr4	375640	395605	FBgn0262636	Lin29	Datilografo, isoform A [Source:UniProtKB/TrEMBL;Acc:Q7KQN5]	Yes
3L	13867414	13903236	FBgn0264006	dysc	dyschronic [Source:FlyBase;Acc:FBgn0264006]	No
3R	4750409	4773197	FBgn0264907	CG44098	MIP13952p [Source:UniProtKB/TrEMBL;Acc:D2NUL5]	Yes
3L	16354746	16359428	FBgn0266417	CG45057	Uncharacterized protein, isoform B [Source:UniProtKB/TrEMBL;Acc:M9NFZ9]	Yes
3L	9614914	9623980	FBgn0267348	LanB2	Laminin B2 [Source:FlyBase;Acc:FBgn0267348]	No
