# Supplementary material for: Age-related changes in polycomb gene regulation disrupt lineage fidelity in intestinal stem cells
Source: eLife. 2021 Mar 16;10:e62250. doi: 10.7554/eLife.62250 (PMC7984841; doi:10.7554/eLife.62250)
Supplement: Supplementary file 4. — Related to Figures 1 and 2. Differentially regulated genes in old ISCs are also found in gene trajectory modules that are upregulated in Cluster 4. See also Figure 2—figure supplement 5. [file elife-62250-supp4.xlsx]

## Sheet: Old v Young Genes in Modules
annotation_name	LogFC +/- 1 Old v Young	p <0.05	pval	symbol	Cluster 4 Module
FBgn0034480	1.39615	0.00982241	5.77342e-05	CG16898	2
FBgn0051436	1.60655	0.00156794	3.32239e-06	CG31436	2
FBgn0004635	1.95603	0.00156794	3.85127e-06	rho	2
FBgn0051288	2.14917	0.000301509	1.70344e-07	CG31288	2
FBgn0010263	2.18118	0.00551555	2.49291e-05	Rbp9	2
FBgn0030778	1.04073	0.0186055	0.000138753	CG4678	4
FBgn0034638	1.52673	0.030727	0.000322894	CG10433	4
FBgn0039927	1.53776	0.0362273	0.000432079	CG11155	4
FBgn0050090	1.80051	0.00135895	2.14975e-06	CG30090	4
FBgn0000015	3.85992	0.00534266	2.29402e-05	Abd-B	4
FBgn0000489	5.98165	0.00491656	1.83329e-05	Pka-C3	4
FBgn0051370	1.56901	0.000301509	1.23056e-07	CG31370	5
FBgn0033928	1.00392	0.00716824	3.64487e-05	Arc2	12
FBgn0063494	1.00838	0.0305519	0.000299646	GstE6	12
FBgn0040256	1.14383	0.00576224	2.73462e-05	Ugt86Dd	12
FBgn0063493	1.18046	0.0199147	0.000158467	GstE7	12
FBgn0040837	1.4289	0.00106093	1.20216e-06	CG8620	12
FBgn0010041	1.53122	0.0372195	0.00045555	GstD5	12
FBgn0033926	1.54788	0.00156794	3.96804e-06	Arc1	12
FBgn0039315	1.6223	0.0305519	0.000298566	CG13658	12
FBgn0039319	1.82957	0.000301509	1.40037e-07	CG13659	12
FBgn0039316	1.96527	0.00106093	1.39119e-06	CG11893	12
FBgn0262620	2.5748	0.00491656	1.79999e-05	CR43144	12
FBgn0052625	3.56541	0.00982241	5.85341e-05	CG32625	12
FBgn0038842	1.03929	0.0413134	0.000588191	hdly	15
FBgn0031489	1.09045	0.00698808	3.4743e-05	CG17224	15
FBgn0031490	1.37358	0.00356684	1.16879e-05	CG17264	15
FBgn0032297	-1.07928	0.00551555	2.43828e-05	CG17124	18
FBgn0038440	1.45325	0.0372195	0.000459072	Gr89a	18
FBgn0034639	1.47755	0.000764842	5.18537e-07	CG15673	18
FBgn0025525	1.55504	0.00483064	1.69209e-05	bab2	18
