# Supplementary material for: Age-related changes in polycomb gene regulation disrupt lineage fidelity in intestinal stem cells
Source: eLife. 2021 Mar 16;10:e62250. doi: 10.7554/eLife.62250 (PMC7984841; doi:10.7554/eLife.62250)
Supplement: Supplementary file 5. — Related to Figure 5. Differential gene expression analysis after Pc-RNAi and trx-RNAi. Tabs separate Pc-RNAi and trx-RNAi comparisons as well as significantly regulated genes. [file elife-62250-supp5.xlsx]

## Sheet: Pc-RNAi
LogFC	AveExpr	t	PValue	FDR	B	geneID	symbol
8.44127	2.95375	15.8471	2.8625e-08	0.000188238	7.7345	FBgn0033395	Cyp4p2
4.75949	4.45131	15.2545	4.09301e-08	0.000188238	9.22521	FBgn0000810	fs(1)K10
-7.03035	2.21416	-12.7681	2.14171e-07	0.000656649	6.56016	FBgn0038290	CG6912
4.20081	3.67795	12.3326	2.94805e-07	0.000677905	7.36268	FBgn0053099	CG33099
10.4586	-1.08804	11.8165	4.36287e-07	0.000802593	3.46613	FBgn0051219	CG31219
-3.05315	5.20387	-11.1911	7.16255e-07	0.000946556	6.55035	FBgn0000477	DNaseII
8.80469	1.1441	11.0416	8.09229e-07	0.000946556	4.36066	FBgn0023523	Or2a
5.7496	3.60912	11.0207	8.23271e-07	0.000946556	6.31766	FBgn0000015	Abd-B
2.0494	6.59976	10.0918	1.81994e-06	0.0017092	5.5341	FBgn0260477	CG30283
-1.48966	7.53416	-8.75484	6.39335e-06	0.00463954	4.20281	FBgn0031253	CG11885
-2.26305	3.91809	-8.73283	6.53524e-06	0.00463954	4.34967	FBgn0036975	CG5618
8.87792	-2.41348	8.72945	6.5573e-06	0.00463954	2.3024	FBgn0264907	CG44098
2.98487	1.83302	8.62001	7.31868e-06	0.00475088	4.24529	FBgn0037138	P5CDh1
1.60535	9.38153	8.56368	7.74769e-06	0.00475088	4.01462	FBgn0031747	CG9021
2.86834	1.74558	8.44154	8.77523e-06	0.00480513	4.07326	FBgn0032350	CG6287
2.30007	5.56713	8.41712	8.99804e-06	0.00480513	3.90426	FBgn0003495	spz
-6.45424	0.843226	-8.24681	1.07342e-05	0.00519648	3.24459	FBgn0028400	Syt4
7.97192	-2.87098	8.05937	1.30776e-05	0.00572799	1.91879	FBgn0010114	hig
1.9359	4.58763	7.93789	1.4891e-05	0.00601563	3.43726	FBgn0003082	phr
-2.474	8.16395	-7.92849	1.50424e-05	0.00601563	3.30886	FBgn0033875	CG6357
-1.60558	6.5428	-7.70273	1.92299e-05	0.00736986	3.05747	FBgn0032451	spict
4.27329	2.00604	7.55159	2.27349e-05	0.00824553	3.16566	FBgn0028490	CG31705
-1.51783	8.35934	-7.52932	2.33077e-05	0.00824553	2.8407	FBgn0023534	CG17778
-4.97171	0.368715	-7.37909	2.76063e-05	0.00906866	2.61597	FBgn0052085	CG32085
1.31558	4.82008	7.22854	3.27922e-05	0.0104008	2.57916	FBgn0051248	CG31248
4.7311	1.52	7.14241	3.62285e-05	0.0108689	2.66629	FBgn0015037	Cyp4p1
1.96107	3.24977	7.10002	3.80613e-05	0.0108689	2.5987	FBgn0034156	CG5348
-2.01188	3.71766	-7.07927	3.89948e-05	0.0108689	2.52551	FBgn0013277	Hsp70Ba
1.517	7.52926	6.97521	4.40683e-05	0.0119218	2.16443	FBgn0086346	ALiX
7.47613	-3.07426	6.94094	4.58921e-05	0.0120604	1.22676	FBgn0001269	inv
1.70001	4.3808	6.81282	5.34722e-05	0.0136622	2.11714	FBgn0013995	Calx
-1.34898	3.73031	-6.71249	6.03555e-05	0.015004	2.05219	FBgn0039525	CG5646
2.78651	4.66283	6.58378	7.06272e-05	0.017044	1.83642	FBgn0015399	kek1
4.49001	0.73228	6.5261	7.58321e-05	0.017044	1.91558	FBgn0263780	CG17684
5.31895	1.95769	6.518	7.65955e-05	0.017044	2.00178	FBgn0086758	chinmo
3.26284	1.6514	6.51109	7.72533e-05	0.017044	2.00985	FBgn0031816	CG16947
6.05901	-3.82599	6.50512	7.78264e-05	0.017044	0.794912	FBgn0037811	CG12592
5.99909	-3.83685	6.42732	8.57339e-05	0.0183391	0.737619	FBgn0011746	ana
-1.27832	5.45868	-6.32996	9.68772e-05	0.0202517	1.39361	FBgn0038476	kuk
5.80783	-3.93668	6.28664	0.00010233	0.0207308	0.613496	FBgn0052750	CG32750
6.54146	-3.56609	6.27632	0.000103676	0.0207308	0.682485	FBgn0036876	CG9451
-1.33999	6.03014	-6.19127	0.00011554	0.022054	1.17836	FBgn0264776	CG44014
-6.19489	-3.72879	-6.18481	0.000116498	0.022054	0.581874	FBgn0039523	CG12885
1.78488	4.85928	6.17821	0.000117487	0.022054	1.24629	FBgn0265623	Su(z)2
1.13158	5.30991	6.13849	0.000123633	0.0227436	1.14356	FBgn0037186	CG11241
2.92388	1.26694	6.08274	0.000132851	0.0239601	1.4919	FBgn0000071	Ama
3.44528	0.565431	5.94408	0.000159158	0.0276214	1.28816	FBgn0026411	Lim1
8.79415	-2.43314	5.88326	0.000172424	0.0293695	0.48051	FBgn0051679	Tengl3
-1.84823	2.42295	-5.85302	0.000179458	0.0300119	1.10084	FBgn0033065	Cyp6w1
1.37752	5.32764	5.83769	0.000183143	0.0300813	0.731964	FBgn0013771	Cyp6a9
-1.64343	2.42136	-5.70887	0.000217523	0.0342859	0.902042	FBgn0003042	Pc
5.52786	-4.06766	5.69989	0.000220165	0.0342859	0.132516	FBgn0035669	CG6592
-6.17577	-3.71193	-5.68924	0.000223345	0.0342859	0.190818	FBgn0000137	ase
3.47558	1.82579	5.67326	0.000228207	0.0342859	0.957088	FBgn0001235	hth
1.63557	2.71334	5.66562	0.000230575	0.0342859	0.806673	FBgn0033301	CG12780
3.11424	0.37745	5.66391	0.000231107	0.0342859	0.944219	FBgn0260429	CG42524
-1.18978	8.06103	-5.57383	0.000261152	0.0379539	0.280179	FBgn0016032	lbm
-1.22357	3.54535	-5.56164	0.000265528	0.0379539	0.533131	FBgn0260874	Ir76a
5.27719	-4.19715	5.55428	0.000268211	0.0379539	-0.0156405	FBgn0038979	CG7046
2.03582	2.98504	5.49278	0.000291791	0.0406651	0.543348	FBgn0034507	CG11192
-0.83455	6.15468	-5.4597	0.000305388	0.0419247	0.141554	FBgn0010548	Aldh-III
5.40583	-4.14448	5.37699	0.000342453	0.0446598	-0.154783	FBgn0260011	NimC4
1.36784	3.84421	5.37559	0.000343118	0.0446598	0.227621	FBgn0260768	CG42566
-2.4637	4.75543	-5.37222	0.000344732	0.0446598	0.155565	FBgn0038199	CCHa1
5.6044	-3.27314	5.35688	0.000352175	0.0449904	-0.0889933	FBgn0051220	CG31220
-1.2993	3.12773	-5.33852	0.000361311	0.0455252	0.275575	FBgn0001142	Gs1
-1.80564	3.02124	-5.27997	0.000392188	0.0487479	0.222988	FBgn0003448	sna
-5.14045	-3.72887	-5.25898	0.000403934	0.0492927	-0.2313	FBgn0262057	Spn77Ba
5.87814	-2.43888	5.24707	0.000410764	0.0492927	-0.135565	FBgn0028949	CG15254
5.37711	-4.14868	5.24383	0.000412648	0.0492927	-0.272522	FBgn0036986	CG5282
-5.09349	-3.22949	-5.23172	0.000419758	0.0494991	-0.217957	FBgn0039087	CG10168
0.824788	8.04975	5.18995	0.000445305	0.051491	-0.285947	FBgn0000566	Eip55E
4.28843	-0.440095	5.18264	0.000449943	0.051491	0.236793	FBgn0000411	D
-1.22723	4.3215	-5.17718	0.000453444	0.051491	-0.128493	FBgn0034722	Rtf1
-2.76926	1.71523	-5.11155	0.000497864	0.0558458	0.180684	FBgn0015591	AstA
0.99455	6.30056	5.03692	0.000554101	0.059658	-0.490992	FBgn0025866	CalpB
3.76985	0.773471	5.02656	0.000562428	0.059658	0.131788	FBgn0261648	salm
-5.42767	-2.75951	-5.01776	0.00056961	0.059658	-0.380764	FBgn0052383	sphinx1
-4.86153	-4.39231	-5.01636	0.000570766	0.059658	-0.527481	FBgn0052382	sphinx2
3.31438	0.473834	5.00181	0.000582877	0.0602393	0.0981761	FBgn0051676	CG31676
3.2257	1.32343	4.93064	0.000646225	0.0658556	-0.0295145	FBgn0037140	CG7442
3.09665	-0.292878	4.92501	0.000651539	0.0658556	-0.027736	FBgn0032082	CG18088
2.19494	2.691	4.91026	0.000665693	0.0662617	-0.255394	FBgn0069056	CG33226
-3.21539	-0.139733	-4.89002	0.000685637	0.0670903	-0.0672966	FBgn0032668	CG17681
-1.06311	4.88744	-4.84737	0.000729811	0.0706611	-0.690513	FBgn0033631	Sod3
-1.53066	1.54247	-4.82619	0.000752862	0.0721336	-0.248434	FBgn0035167	Gr61a
-3.36314	-0.269272	-4.80438	0.000777416	0.0737182	-0.188911	FBgn0052855	CG32855
-4.80355	-2.97235	-4.78772	0.000796738	0.0747796	-0.637622	FBgn0032419	CG17217
1.63493	2.97032	4.76199	0.000827605	0.0761308	-0.542339	FBgn0013323	Ptth
4.70179	-4.47912	4.76192	0.000827689	0.0761308	-0.781216	FBgn0035610	Lkr
4.92188	-3.83381	4.75448	0.000836847	0.0762111	-0.72259	FBgn0004034	y
-0.851686	5.36848	-4.73925	0.000855944	0.0766958	-0.899752	FBgn0260440	spdo
5.13178	3.07883	4.72667	0.000872071	0.0766958	-0.437284	FBgn0030098	CG12057
-0.910983	5.14427	-4.71837	0.000882875	0.0766958	-0.914787	FBgn0031974	CG12560
1.10007	4.25412	4.71716	0.000884463	0.0766958	-0.821339	FBgn0040388	boi
1.12924	4.94178	4.69612	0.00091258	0.0766958	-0.928894	FBgn0034706	CG11275
1.06619	8.33937	4.69332	0.000916393	0.0766958	-1.04192	FBgn0031745	rau
1.00206	8.20103	4.69005	0.000920867	0.0766958	-1.04871	FBgn0262952	mt:ND4
0.893146	4.47639	4.68884	0.000922518	0.0766958	-0.896934	FBgn0034512	CG18067
4.68794	-4.47912	4.68664	0.000925553	0.0766958	-0.853539	FBgn0085480	CG34451
-1.71647	4.01793	-4.66063	0.00096217	0.0790182	-0.857321	FBgn0000636	Fas3
1.19715	4.61289	4.57603	0.00109233	0.0880697	-1.08218	FBgn0052407	CG32407
0.698444	6.48877	4.57071	0.00110111	0.0880697	-1.22129	FBgn0039774	CDase
-0.778079	9.48386	-4.48852	0.00124686	0.0968413	-1.34395	FBgn0001091	Gapdh1
3.1743	-0.957829	4.48819	0.00124747	0.0968413	-0.643949	FBgn0262814	CG43185
1.3438	6.28991	4.48602	0.00125158	0.0968413	-1.34294	FBgn0063497	GstE3
1.71305	1.70338	4.48139	0.00126042	0.0968413	-0.779496	FBgn0263400	CG43446
-1.07559	4.03358	-4.47983	0.00126342	0.0968413	-1.16322	FBgn0264006	dysc
-2.39437	-0.292901	-4.45363	0.00131478	0.0992662	-0.651886	FBgn0259935	CG42458
2.1578	-0.0155319	4.4527	0.00131664	0.0992662	-0.656836	FBgn0038419	CG14879
-4.55783	-3.25284	-4.41131	0.0014025	0.104879	-1.04991	FBgn0035782	CG14835
0.965779	8.11782	4.39936	0.00142838	0.105954	-1.51009	FBgn0035083	Tina-1
-0.65411	6.32536	-4.36008	0.00151707	0.111005	-1.55134	FBgn0038039	CG5196
2.9535	-0.491696	4.35533	0.00152817	0.111005	-0.792707	FBgn0032713	CG17323
1.06804	7.03154	4.35265	0.0015345	0.111005	-1.58007	FBgn0013684	mt:ND5
-1.86007	1.5316	-4.34832	0.00154475	0.111005	-0.956899	FBgn0086704	stops
3.30129	-1.22937	4.3281	0.00159359	0.113626	-0.877591	FBgn0259959	Sfp26Ac
-2.25847	0.203024	-4.29618	0.00167403	0.118444	-0.888855	FBgn0033268	Obp44a
-0.818698	5.66894	-4.28993	0.0016903	0.118682	-1.63204	FBgn0262624	Tmhs
0.939709	9.62817	4.28059	0.00171488	0.119496	-1.67402	FBgn0003360	sesB
-1.06452	4.0985	-4.26055	0.00176893	0.122335	-1.52398	FBgn0000448	Hr46
-1.88634	1.24367	-4.24387	0.00181532	0.124607	-1.07626	FBgn0063499	GstE10
-4.62067	-2.80233	-4.23205	0.00184896	0.125677	-1.22157	FBgn0032484	kek4
-4.38597	-2.4789	-4.22883	0.00185823	0.125677	-1.20704	FBgn0051221	CG31221
5.061	-2.81569	4.22368	0.00187316	0.125762	-1.22199	FBgn0037238	CG1090
-4.37973	-2.79931	-4.21373	0.00190239	0.126799	-1.24674	FBgn0040832	CG8012
-4.52296	-2.74859	-4.18704	0.00198318	0.131232	-1.2724	FBgn0010389	htl
0.833064	10.8317	4.17691	0.0020148	0.131434	-1.81372	FBgn0013674	mt:CoI
0.923373	3.42976	4.16991	0.00203694	0.131942	-1.57065	FBgn0036519	CG7650
4.47289	-0.642257	4.16338	0.00205784	0.13227	-1.0802	FBgn0000287	salr
-1.43661	2.61942	-4.15938	0.00207077	0.13227	-1.43135	FBgn0032899	CG9338
3.19197	-0.123631	4.13074	0.00216572	0.137382	-1.10763	FBgn0036363	CG10140
-1.26768	3.29699	-4.12464	0.00218656	0.137753	-1.6104	FBgn0000451	ect
2.40434	0.509646	4.09275	0.00229887	0.143843	-1.2085	FBgn0037788	CG3940
1.17792	6.7404	4.07733	0.00235536	0.146382	-2.02022	FBgn0005624	Psc
0.942955	9.9916	4.01901	0.00258254	0.159424	-2.0924	FBgn0013672	mt:ATPase6
0.909725	10.0986	4.00877	0.00262478	0.160951	-2.10677	FBgn0013678	mt:Cyt-b
-0.640583	8.22173	-3.99871	0.00266693	0.161577	-2.16219	FBgn0001125	Got2
0.872416	8.57015	3.99796	0.00267011	0.161577	-2.15803	FBgn0029506	Tsp42Ee
-0.710648	6.58555	-3.98403	0.00272977	0.162578	-2.17214	FBgn0014906	Hydr2
-0.648646	7.82225	-3.97787	0.00275664	0.162578	-2.1994	FBgn0033434	CG1902
0.791685	7.36934	3.97368	0.00277502	0.162578	-2.20387	FBgn0040942	CG12643
1.2155	4.97094	3.967	0.00280464	0.162619	-2.09995	FBgn0040813	Nplp2
3.65648	-1.67204	3.96043	0.0028341	0.162619	-1.40263	FBgn0051463	CG31463
0.922	3.50867	3.95988	0.00283658	0.162619	-1.92488	FBgn0038194	Cyp6d5
-0.689792	7.58113	-3.95412	0.00286269	0.162619	-2.23813	FBgn0016078	wun
-3.43451	-1.19672	-3.9538	0.00286413	0.162619	-1.3741	FBgn0013725	phyl
2.71158	-0.580109	3.94444	0.00290714	0.164048	-1.36948	FBgn0053136	CG33136
-1.35503	3.71089	-3.93837	0.0029354	0.164633	-1.97942	FBgn0262141	CG42867
-1.55216	4.60873	-3.91689	0.00303769	0.169337	-2.13514	FBgn0026197	noe
1.2772	7.2585	3.91186	0.00306217	0.169674	-2.30243	FBgn0063493	GstE7
4.77849	-3.63138	3.89745	0.00313346	0.172584	-1.63055	FBgn0085244	CG34215
0.780303	5.40175	3.89019	0.00317007	0.173562	-2.26942	FBgn0034354	GstE11
0.701865	5.80673	3.8724	0.0032616	0.177516	-2.32516	FBgn0035999	CG3552
0.745219	3.70653	3.84372	0.00341509	0.184777	-2.1527	FBgn0025777	homer
1.07208	4.03635	3.80644	0.00362602	0.195042	-2.25701	FBgn0263219	Dscam4
-1.10919	3.89048	-3.79804	0.00367543	0.196179	-2.2476	FBgn0261859	CG42788
-1.57551	0.838745	-3.79356	0.00370204	0.196179	-1.73222	FBgn0051755	SoYb
0.895282	4.45344	3.79204	0.00371114	0.196179	-2.34021	FBgn0040723	CG5011
-0.99832	5.30117	-3.77475	0.00381602	0.199676	-2.45045	FBgn0033188	Drat
1.86411	1.44622	3.77071	0.003841	0.199676	-1.85243	FBgn0032264	Lip4
-3.12649	-0.520775	-3.76699	0.00386413	0.199676	-1.62462	FBgn0034636	CG10440
2.50435	1.21466	3.76119	0.00390049	0.199695	-1.80816	FBgn0053306	CG33306
0.767785	5.50906	3.76002	0.00390792	0.199695	-2.49353	FBgn0051974	CG31974
1.62505	0.603783	3.75319	0.00395125	0.200793	-1.76363	FBgn0039277	CG13650
-0.939653	3.20356	-3.72777	0.00411718	0.208076	-2.25406	FBgn0037831	Cap-H2
-4.21229	-3.39877	-3.71851	0.00417938	0.209817	-1.8424	FBgn0034996	CG13575
0.850772	5.15887	3.71588	0.00419724	0.209817	-2.53986	FBgn0035158	CG13895
0.806965	8.21552	3.71155	0.00422679	0.210151	-2.63978	FBgn0262854	CG43218
-1.48024	4.86818	-3.70091	0.00430039	0.212293	-2.52433	FBgn0038147	CCHa2
-0.885187	4.06165	-3.69867	0.00431603	0.212293	-2.44405	FBgn0029939	CG9650
4.26855	-3.00707	3.69207	0.00436254	0.213439	-1.85981	FBgn0037521	CG2993
-0.984653	3.684	-3.67994	0.00444932	0.214776	-2.41398	FBgn0039099	GILT2
4.02301	-2.15406	3.67926	0.00445422	0.214776	-1.82155	FBgn0085382	CG34353
-0.725023	6.58543	-3.67848	0.0044599	0.214776	-2.68104	FBgn0033079	Fmo-2
3.20435	-1.03169	3.65978	0.00459757	0.220252	-1.77369	FBgn0001325	Kr
0.884601	11.7814	3.65609	0.00462526	0.220431	-2.65101	FBgn0013676	mt:CoIII
4.57547	-2.84162	3.64754	0.00469015	0.221231	-1.90507	FBgn0034785	CG3649
4.31934	-3.09664	3.63221	0.00480879	0.22567	-1.93431	FBgn0039651	CG14508
-1.01751	2.84894	-3.62597	0.00485792	0.226818	-2.3546	FBgn0032691	Atac2
-1.79439	1.1191	-3.62231	0.00488702	0.227024	-2.03714	FBgn0003483	spn-E
-0.590151	4.77525	-3.60294	0.0050441	0.232749	-2.69677	FBgn0047114	CG31142
-1.2611	2.78454	-3.5954	0.0051066	0.232749	-2.38409	FBgn0035246	CG13928
-1.97446	0.755997	-3.59171	0.00513752	0.232749	-2.02385	FBgn0038198	Npc2b
1.75761	0.188569	3.59158	0.00513855	0.232749	-1.96231	FBgn0035587	CG4623
-0.964316	3.53189	-3.58915	0.00515901	0.232749	-2.54255	FBgn0036386	CG8833
-2.05999	4.08523	-3.58879	0.00516209	0.232749	-2.58608	FBgn0034480	CG16898
0.581067	4.97482	3.58178	0.00522161	0.233655	-2.75189	FBgn0028540	CG9008
-1.39988	0.964158	-3.57868	0.00524817	0.233655	-2.09829	FBgn0052195	CG32195
1.4519	3.16707	3.57749	0.00525838	0.233655	-2.47874	FBgn0040805	CG12355
0.648191	4.28383	3.5733	0.00529462	0.233897	-2.68943	FBgn0038488	m-cup
0.791336	3.29349	3.56978	0.0053252	0.233897	-2.5365	FBgn0266719	Unc-13-4B
0.84264	11.4205	3.56807	0.00534013	0.233897	-2.80869	FBgn0013675	mt:CoII
3.14816	-0.638337	3.56436	0.00537269	0.234209	-1.91731	FBgn0038756	CG4783
-0.658426	9.3692	-3.55867	0.00542296	0.234262	-2.87519	FBgn0014869	Pglym78
0.679297	4.86308	3.5529	0.00547453	0.234262	-2.78893	FBgn0030484	GstT4
3.66016	-1.45758	3.54933	0.00550668	0.234262	-1.93795	FBgn0038680	Cyp12a5
4.21989	-3.54592	3.54887	0.00551079	0.234262	-2.04943	FBgn0038852	HHEX
-2.03069	-0.743588	-3.54711	0.00552672	0.234262	-1.95063	FBgn0262577	CG43117
-0.703084	4.06338	-3.54057	0.00558631	0.235701	-2.71295	FBgn0039543	CG12428
-0.661014	6.13154	-3.53727	0.00561665	0.235899	-2.90308	FBgn0030396	CG2556
4.23151	-3.52645	3.52428	0.00573769	0.23921	-2.08043	FBgn0004394	pdm2
0.797802	7.13099	3.51992	0.0057789	0.23921	-2.96031	FBgn0013679	mt:ND1
1.08783	4.05054	3.51802	0.00579703	0.23921	-2.73918	FBgn0038681	Cyp12a4
1.69677	1.1255	3.51776	0.0057995	0.23921	-2.21235	FBgn0025525	bab2
1.36899	1.21668	3.49947	0.00597654	0.24441	-2.26645	FBgn0034005	ItgalphaPS4
-0.581595	7.55739	-3.49925	0.00597871	0.24441	-3.00047	FBgn0027932	Akap200
0.659085	4.5602	3.4933	0.0060375	0.245721	-2.85808	FBgn0033814	CG4670
0.982814	5.44141	3.48501	0.00612044	0.247999	-2.94863	FBgn0050360	Mal-A6
-2.39911	-1.04028	-3.47538	0.00621824	0.249269	-2.04188	FBgn0085487	CG34458
0.739696	6.43074	3.47398	0.00623262	0.249269	-3.02137	FBgn0050154	CG30154
-1.7709	0.115756	-3.47215	0.0062515	0.249269	-2.13919	FBgn0034224	insb
-0.859603	5.1713	-3.47123	0.00626096	0.249269	-2.95194	FBgn0030968	CG7322
-0.784571	5.02427	-3.46868	0.00628728	0.249269	-2.94438	FBgn0035995	CG3529
1.93109	0.151436	3.46256	0.00635109	0.250718	-2.15392	FBgn0033748	vis
-0.793529	3.26996	-3.45913	0.00638709	0.251062	-2.71705	FBgn0036759	CG5577
3.36429	4.28945	3.43557	0.00664034	0.259906	-2.79213	FBgn0010425	epsilonTry
1.02787	2.67234	3.41277	0.00689531	0.268742	-2.67557	FBgn0052512	CG32512
2.57711	-0.526476	3.3978	0.00706816	0.274129	-2.17834	FBgn0011556	zetaTry
-0.660244	7.44744	-3.39567	0.00709314	0.274129	-3.17508	FBgn0033453	CG1667
0.727887	3.66649	3.38776	0.0071867	0.276583	-2.90857	FBgn0035591	CG4611
0.74637	4.5339	3.37991	0.00728066	0.278956	-3.04537	FBgn0038972	CG7054
-2.91339	-0.10463	-3.37507	0.00733935	0.278956	-2.238	FBgn0053474	CG33474
0.975236	2.99633	3.36097	0.00751288	0.283211	-2.82657	FBgn0261553	CG42671
2.10626	0.674519	3.32578	0.00796488	0.299024	-2.43464	FBgn0035861	CG7213
0.548292	7.29659	3.31045	0.0081706	0.305196	-3.31883	FBgn0052267	CG32267
-0.648423	4.23998	-3.30861	0.00819564	0.305196	-3.12972	FBgn0030206	CG2889
3.98724	3.11213	3.29983	0.00831612	0.308257	-2.78335	FBgn0036738	CG7542
0.904948	4.70252	3.29579	0.00837228	0.308257	-3.20457	FBgn0033339	Sec31
-1.93941	-0.501075	-3.29535	0.00837837	0.308257	-2.34893	FBgn0051345	CG31345
-0.863739	5.24209	-3.29028	0.00844946	0.309634	-3.26454	FBgn0038595	CG7142
1.07949	5.40889	3.27036	0.00873446	0.318808	-3.30881	FBgn0013673	mt:ATPase8
1.36576	2.48946	3.26327	0.00883832	0.320481	-2.88152	FBgn0032088	CG13102
0.622339	4.505	3.26248	0.00884999	0.320481	-3.24257	FBgn0052448	CG32448
-0.815175	3.38626	-3.25909	0.00890012	0.321032	-3.07441	FBgn0031148	Cbs
0.90697	3.83654	3.2493	0.00904666	0.32321	-3.16482	FBgn0000256	capu
1.10734	5.53734	3.24381	0.00912999	0.32321	-3.36315	FBgn0013681	mt:ND3
0.584151	5.72681	3.2434	0.00913618	0.32321	-3.38141	FBgn0259740	CG42394
1.76953	1.45655	3.22977	0.00934651	0.32689	-2.735	FBgn0264296	CG43774
0.510567	7.24106	3.22751	0.0093818	0.32689	-3.4595	FBgn0001961	Arpc1
-2.57979	0.462304	-3.22748	0.00938237	0.32689	-2.5405	FBgn0004169	up
-1.04896	2.39375	-3.21893	0.00951723	0.330338	-2.94697	FBgn0031645	CG3036
1.64942	-0.407441	3.21283	0.00961486	0.332472	-2.49018	FBgn0250907	Cht3
-0.79789	2.62598	-3.20525	0.0097375	0.332537	-3.02084	FBgn0032002	CG8353
4.47661	-0.561738	3.20459	0.00974826	0.332537	-2.43596	FBgn0035300	CG1139
1.05275	6.69872	3.20037	0.00981721	0.332537	-3.49264	FBgn0051955	CG31955
-0.815155	4.71772	-3.19986	0.00982553	0.332537	-3.36922	FBgn0040070	Trx-2
3.02369	-1.21625	3.1985	0.00984798	0.332537	-2.4371	FBgn0261989	CG42807
0.910687	2.15862	3.18949	0.00999759	0.335612	-2.95411	FBgn0062412	Ctr1B
-0.753008	4.20234	-3.1853	0.010068	0.336746	-3.33163	FBgn0039459	IntS12
0.950504	4.83314	3.17625	0.0102216	0.340647	-3.42068	FBgn0034761	CG4250
3.46853	-3.18613	3.17305	0.0102765	0.341195	-2.51328	FBgn0053648	CG33648
4.10567	-3.2039	3.17097	0.0103123	0.341195	-2.51066	FBgn0039177	CG13611
2.79109	-1.92832	3.16346	0.0104428	0.343052	-2.47746	FBgn0052219	CG32219
-0.605148	5.42042	-3.16236	0.0104621	0.343052	-3.49861	FBgn0038739	CG4686
3.46835	-3.43624	3.16133	0.0104803	0.343052	-2.5334	FBgn0263079	CG43338
0.705876	5.5061	3.15296	0.0106283	0.344715	-3.52031	FBgn0026319	Traf4
1.55365	0.72527	3.15213	0.0106429	0.344715	-2.74187	FBgn0262636	Lin29
-0.598991	6.10622	-3.1521	0.0106435	0.344715	-3.55651	FBgn0010226	GstS1
0.940082	5.09763	3.1425	0.0108163	0.349082	-3.50315	FBgn0085423	CG34394
4.31874	-2.74537	3.13949	0.010871	0.349622	-2.54181	FBgn0066101	LpR1
2.6163	-1.95632	3.13174	0.0110131	0.352958	-2.52169	FBgn0035985	Cpr67B
3.58852	-1.909	3.12692	0.0111026	0.354588	-2.52958	FBgn0033327	PGRP-SC1b
2.23572	-1.31103	3.12039	0.0112249	0.355603	-2.5548	FBgn0031209	Ir21a
-1.14396	1.11587	-3.12013	0.0112298	0.355603	-2.87478	FBgn0039932	fuss
1.45641	0.442794	3.11648	0.0112989	0.355872	-2.75789	FBgn0266369	Mtp
-2.31426	-1.19415	-3.11445	0.0113375	0.355872	-2.5686	FBgn0029879	APC7
1.94668	0.515572	3.11249	0.0113749	0.355872	-2.75804	FBgn0039321	CG10550
0.588449	8.47235	3.10877	0.011446	0.356883	-3.6589	FBgn0021967	Pdsw
0.578583	3.96598	3.10383	0.0115414	0.357264	-3.43954	FBgn0031805	CG9505
1.05399	2.36947	3.103	0.0115575	0.357264	-3.13603	FBgn0034494	CG10444
0.927602	3.34814	3.10211	0.0115748	0.357264	-3.33014	FBgn0085409	CG34380
-0.895273	4.83629	-3.09458	0.0117221	0.360601	-3.56011	FBgn0004170	sc
-0.534496	9.43639	-3.08312	0.01195	0.366388	-3.68171	FBgn0033313	Cirl
-0.836726	3.88862	-3.08051	0.0120026	0.366776	-3.46203	FBgn0037548	CG7900
-0.893689	6.20968	-3.07583	0.0120974	0.367405	-3.68849	FBgn0032087	CG9568
-0.514547	5.83798	-3.07555	0.012103	0.367405	-3.67397	FBgn0038627	CG7694
0.718366	5.85642	3.07099	0.0121962	0.368784	-3.68161	FBgn0020236	ATPCL
0.666012	5.23127	3.06888	0.0122396	0.368784	-3.6431	FBgn0086690	cp309
0.863631	4.19044	3.06747	0.0122688	0.368784	-3.52842	FBgn0265991	Zasp52
-0.624207	3.94585	-3.06058	0.0124118	0.37066	-3.50889	FBgn0032814	CG10366
-0.509316	6.40723	-3.05712	0.0124842	0.370934	-3.73077	FBgn0031996	CG8460
-2.51551	0.950059	-3.05629	0.0125016	0.370934	-2.88831	FBgn0052053	CG32053
-1.78091	0.124769	-3.05334	0.0125638	0.371583	-2.80248	FBgn0033652	ths
4.39238	-3.07584	3.05033	0.0126276	0.372272	-2.6596	FBgn0038481	CG17475
0.694359	8.33708	3.04331	0.0127778	0.374918	-3.77237	FBgn0013469	klu
-0.634502	3.6754	-3.04109	0.0128256	0.374918	-3.49798	FBgn0037746	CG8478
-0.805276	4.57143	-3.04012	0.0128465	0.374918	-3.62509	FBgn0032886	CG9328
-2.77189	-2.26866	-3.03855	0.0128804	0.374918	-2.65323	FBgn0027788	Hey
-0.630326	4.74086	-3.03052	0.0130558	0.378825	-3.66263	FBgn0038772	mdlc
-1.58837	0.19909	-3.02615	0.0131523	0.380425	-2.86078	FBgn0002571	Mal-A3
-1.61212	-0.352429	-3.01131	0.0134854	0.387156	-2.81118	FBgn0053200	ventrally-expressed-protein-D
1.18247	0.905644	3.01017	0.0135113	0.387156	-3.01732	FBgn0034628	Acox57D-p
-2.23591	-1.0394	-3.00253	0.0136862	0.390008	-2.74546	FBgn0032428	CG6405
-0.517102	5.16802	-3.00199	0.0136988	0.390008	-3.75286	FBgn0086785	Vps36
-0.522846	5.48678	-2.99934	0.0137601	0.390008	-3.78167	FBgn0003071	Pfk
1.78732	-0.705248	2.99846	0.0137805	0.390008	-2.78905	FBgn0037153	olf413
-0.657095	3.90673	-2.99628	0.0138312	0.390244	-3.61143	FBgn0051075	CG31075
4.1571	0.709855	2.99198	0.0139319	0.391882	-2.89021	FBgn0036996	mag
1.83487	0.39873	2.98269	0.014152	0.396861	-2.95758	FBgn0264442	ab
-0.797292	3.0004	-2.97908	0.0142384	0.39807	-3.47395	FBgn0027580	CG1516
-0.499258	4.78545	-2.97664	0.0142972	0.398501	-3.76055	FBgn0031144	CG1529
3.15166	-0.568066	2.97439	0.0143516	0.398809	-2.8094	FBgn0033355	CG13748
3.34397	-3.68052	2.97051	0.0144457	0.399359	-2.77768	FBgn0053920	CG33920
1.80153	2.31471	2.97	0.0144582	0.399359	-3.32378	FBgn0043470	lambdaTry
1.52096	1.11986	2.96455	0.0145918	0.399541	-3.11748	FBgn0035880	CG17352
-0.500251	9.90967	-2.96194	0.0146563	0.399541	-3.87692	FBgn0000579	Eno
-0.450507	9.01894	-2.96125	0.0146733	0.399541	-3.8991	FBgn0267385	PyK
2.33693	4.14222	2.9609	0.014682	0.399541	-3.63942	FBgn0003358	Jon99Ci
4.03818	-3.13128	2.93863	0.0152446	0.412917	-2.80607	FBgn0033048	CG7881
2.16757	2.65712	2.9379	0.0152633	0.412917	-3.42446	FBgn0003356	Jon99Cii
-2.25857	-0.793154	-2.92623	0.0155672	0.418764	-2.88116	FBgn0261555	CG42673
0.763958	3.23063	2.92558	0.0155842	0.418764	-3.61018	FBgn0004449	Ten-m
3.89809	-3.09581	2.92438	0.015616	0.418764	-2.82453	FBgn0003450	snk
0.986921	1.69027	2.92228	0.0156715	0.41903	-3.30789	FBgn0034733	CG4752
2.93442	0.267482	2.91824	0.0157787	0.419825	-2.98938	FBgn0015001	iotaTry
2.09924	-0.540571	2.91773	0.0157925	0.419825	-2.9239	FBgn0010241	Mdr50
3.5838	-3.07715	2.91348	0.0159062	0.421013	-2.84002	FBgn0262870	axo
-0.532273	6.85351	-2.91264	0.0159287	0.421013	-3.98946	FBgn0033101	CG9436
2.46034	-1.15985	2.90796	0.0160554	0.423145	-2.87503	FBgn0036321	CG14120
-0.675682	8.12966	-2.89276	0.0164734	0.43292	-4.03098	FBgn0035346	CG1146
4.0839	2.61544	2.88554	0.0166755	0.436984	-3.37961	FBgn0020906	Jon25Bi
1.71739	0.0615351	2.88292	0.0167497	0.437681	-3.06637	FBgn0029663	CG10804
-3.36837	-1.61509	-2.8793	0.0168527	0.439124	-2.88048	FBgn0037475	Fer1
-0.579436	5.60912	-2.87556	0.0169595	0.440659	-4.00006	FBgn0263603	Zn72D
-0.588676	4.35306	-2.86806	0.0171762	0.445032	-3.89383	FBgn0038498	beat-IIa
0.571659	3.57921	2.861	0.0173824	0.447806	-3.78758	FBgn0051989	Cap-D3
2.82496	-1.80877	2.85911	0.017438	0.447806	-2.90834	FBgn0029762	NAAT1
-0.442484	7.01888	-2.85899	0.0174416	0.447806	-4.08427	FBgn0035195	Sac1
1.40153	-0.3027	2.85776	0.017478	0.447806	-3.06343	FBgn0086604	CG12484
3.50391	-2.58502	2.85124	0.0176719	0.450018	-2.91338	FBgn0005670	Cyp4d1
-1.31014	0.225046	-2.84874	0.017747	0.450018	-3.15976	FBgn0051313	CG31313
-2.33593	-2.11075	-2.84164	0.0179616	0.450018	-2.92735	FBgn0028852	CG15262
1.45663	-0.251624	2.84157	0.0179635	0.450018	-3.09497	FBgn0029990	CG2233
-3.30068	-2.98827	-2.84064	0.017992	0.450018	-2.93264	FBgn0260653	serp
1.35192	0.950051	2.83897	0.0180428	0.450018	-3.29915	FBgn0262580	CG43120
-0.452868	7.33676	-2.83508	0.018162	0.450018	-4.12949	FBgn0003074	Pgi
1.70919	2.0076	2.83459	0.0181771	0.450018	-3.49573	FBgn0037678	CG16749
-0.520131	8.95792	-2.83403	0.0181944	0.450018	-4.11687	FBgn0032889	CG9331
1.91495	0.667468	2.83174	0.0182652	0.450018	-3.23766	FBgn0002773	Mlc2
2.04761	0.233571	2.83004	0.0183176	0.450018	-3.16376	FBgn0034462	CG15905
0.829665	5.01375	2.82976	0.0183263	0.450018	-4.0291	FBgn0264089	sli
1.65797	0.593744	2.82722	0.0184053	0.450018	-3.24588	FBgn0034662	CG13492
-0.982618	1.33848	-2.82673	0.0184206	0.450018	-3.40028	FBgn0035710	SP1173
-0.713762	8.33198	-2.82478	0.0184815	0.450018	-4.14398	FBgn0031971	Sirup
3.53483	-2.71544	2.82439	0.0184939	0.450018	-2.95018	FBgn0037616	CG8136
1.69707	0.811655	2.8209	0.0186033	0.451487	-3.29017	FBgn0086691	UK114
2.45187	3.35267	2.81862	0.0186754	0.451741	-3.74011	FBgn0031249	CG11911
-0.62208	4.95288	-2.81746	0.018712	0.451741	-4.04611	FBgn0026417	Hus1-like
1.12696	0.741688	2.81584	0.0187637	0.451801	-3.30715	FBgn0036552	CG17028
1.8781	0.0362217	2.8132	0.0188477	0.452211	-3.16814	FBgn0033302	Cyp6a14
-0.647183	4.762	-2.80032	0.0192635	0.459827	-4.05582	FBgn0031897	CG13784
1.71466	4.16704	2.79791	0.0193421	0.459827	-3.95173	FBgn0003357	Jon99Ciii
0.569994	8.58044	2.79745	0.0193573	0.459827	-4.18705	FBgn0260972	alc
-0.570122	5.03203	-2.7945	0.0194541	0.459827	-4.09301	FBgn0038454	CG10324
0.677472	3.52864	2.79396	0.0194721	0.459827	-3.88944	FBgn0003502	Btk29A
-2.99035	-1.08555	-2.79321	0.0194969	0.459827	-3.04371	FBgn0033574	Spn47C
0.789922	3.21184	2.78722	0.0196956	0.462142	-3.84016	FBgn0004892	sob
-0.422167	8.09684	-2.78448	0.0197874	0.463115	-4.21639	FBgn0013726	pnut
0.638812	4.77668	2.77911	0.0199683	0.465076	-4.09368	FBgn0015011	Ahcy89E
-0.699448	3.90291	-2.77883	0.0199776	0.465076	-3.97779	FBgn0264273	Sema-2b
-0.632496	4.97297	-2.7775	0.0200228	0.465076	-4.11556	FBgn0035189	CG9119
2.68332	-0.332728	2.77421	0.0201348	0.466099	-3.15473	FBgn0028532	CG7968
-1.56453	3.27292	-2.77294	0.0201781	0.466099	-3.84258	FBgn0085415	CG34386
2.36742	-1.44136	2.76965	0.0202909	0.466099	-3.06211	FBgn0035697	CG10163
0.46771	8.22979	2.76832	0.0203366	0.466099	-4.24247	FBgn0027885	Aac11
-0.97915	1.498	-2.76799	0.020348	0.466099	-3.52688	FBgn0062978	CG31808
-0.513873	4.49419	-2.76653	0.0203986	0.466099	-4.08406	FBgn0031457	CG3077
2.3672	6.79311	2.76586	0.0204216	0.466099	-4.2181	FBgn0032049	Bace
2.97379	-2.71364	2.76106	0.0205883	0.468675	-3.03257	FBgn0031432	Cyp309a1
-0.501679	4.66768	-2.75848	0.0206788	0.468675	-4.1178	FBgn0015546	spel1
0.59321	4.13486	2.75713	0.0207262	0.468675	-4.0516	FBgn0032078	C1GalTA
3.44108	3.24193	2.75678	0.0207383	0.468675	-3.7462	FBgn0034663	CG4363
0.665217	6.84252	2.75514	0.020796	0.468828	-4.25645	FBgn0050345	CG30345
-0.469017	5.24026	-2.75229	0.0208969	0.46995	-4.18317	FBgn0031492	CG3542
0.579752	3.69043	2.74879	0.021021	0.470441	-3.99608	FBgn0030745	CG4239
1.60665	-0.0639374	2.746	0.021121	0.470859	-3.26988	FBgn0015010	Ag5r
-1.38693	0.135751	-2.74113	0.0212959	0.470859	-3.31543	FBgn0004359	T48
0.78973	3.35569	2.73827	0.0213994	0.470859	-3.94945	FBgn0050089	CG30089
-0.566326	4.51265	-2.73782	0.0214159	0.470859	-4.13402	FBgn0036549	CG10516
-0.663671	5.63956	-2.73733	0.0214334	0.470859	-4.23589	FBgn0262475	bru-2
2.37473	0.114014	2.7369	0.0214492	0.470859	-3.27665	FBgn0035718	CG14820
-0.827006	3.06144	-2.73362	0.0215688	0.472356	-3.89914	FBgn0036485	FucTA
2.11149	1.04504	2.72985	0.0217072	0.474258	-3.46624	FBgn0085424	nub
4.73778	-0.433802	2.72492	0.0218891	0.476426	-3.14494	FBgn0035620	CG5150
0.74441	4.70565	2.72436	0.02191	0.476426	-4.17687	FBgn0002643	mam
3.21443	-2.18498	2.72088	0.0220396	0.478115	-3.08929	FBgn0036153	CG7573
-0.484138	4.63431	-2.71666	0.022198	0.480417	-4.18481	FBgn0024887	kin17
1.5294	3.35872	2.71215	0.0223683	0.482451	-3.9671	FBgn0010387	Dbi
3.94065	7.98756	2.71002	0.0224494	0.482451	-4.30432	FBgn0033774	CG12374
-0.790179	2.71179	-2.7043	0.0226683	0.485655	-3.87844	FBgn0032783	CG10237
3.34965	-3.6536	2.70337	0.022704	0.485655	-3.11552	FBgn0015336	CG15865
-0.461117	4.58879	-2.7008	0.0228034	0.486498	-4.20671	FBgn0039773	CG2224
1.05308	3.47091	2.69961	0.0228492	0.486498	-4.0279	FBgn0063492	GstE8
-0.882414	2.25389	-2.69777	0.0229208	0.486887	-3.79352	FBgn0035094	CG9380
-0.38748	7.5329	-2.69549	0.0230094	0.486887	-4.36796	FBgn0027087	Aats-his
3.21973	-1.38286	2.69506	0.0230263	0.486887	-3.16151	FBgn0085399	CG34370
3.12477	-1.9783	2.68705	0.023341	0.491451	-3.14398	FBgn0038082	CG5724
-0.539876	5.11079	-2.68618	0.0233758	0.491451	-4.28332	FBgn0039226	Ude
-1.3636	0.740828	-2.68551	0.0234024	0.491451	-3.50957	FBgn0033196	CG1358
-0.579227	4.44453	-2.6808	0.0235901	0.493486	-4.22151	FBgn0022160	Gpo-1
3.22078	-2.38013	2.68038	0.0236066	0.493486	-3.14188	FBgn0033960	CG10151
-2.00461	-1.00156	-2.66722	0.0241396	0.503484	-3.2578	FBgn0038540	CG14321
0.761859	2.71411	2.66416	0.0242654	0.503924	-3.94669	FBgn0040260	Ugt36Bc
2.15582	-1.35472	2.66404	0.0242703	0.503924	-3.22857	FBgn0004198	ct
-0.544919	4.28466	-2.66232	0.024341	0.504254	-4.23253	FBgn0033526	Caf1-105
-0.485296	6.06945	-2.65908	0.0244752	0.504761	-4.39323	FBgn0261020	wol
-1.12475	1.96551	-2.65462	0.0246612	0.505967	-3.80251	FBgn0030778	CG4678
1.11882	1.0273	2.65338	0.024713	0.505967	-3.62389	FBgn0063495	GstE5
2.7136	-1.03876	2.65021	0.0248462	0.505967	-3.26587	FBgn0032228	CG5367
0.424284	8.25339	2.64945	0.0248782	0.505967	-4.44316	FBgn0033134	Tsp42El
4.10755	-2.42511	2.64864	0.0249123	0.505967	-3.18163	FBgn0036756	cln3
-0.792921	4.97411	-2.64849	0.0249188	0.505967	-4.33139	FBgn0016031	lama
-0.827977	1.76714	-2.64366	0.0251237	0.509004	-3.78739	FBgn0030398	Cpr11B
1.65519	1.93362	2.64048	0.0252599	0.510639	-3.80354	FBgn0030776	CG4653
0.554615	3.19877	2.63287	0.025588	0.513792	-4.10081	FBgn0033538	CG11883
-3.00588	-0.506483	-2.63247	0.0256054	0.513792	-3.33525	FBgn0037697	GstZ2
-0.839125	2.95284	-2.6318	0.0256342	0.513792	-4.047	FBgn0029092	ced-6
0.388685	7.25063	2.63169	0.0256393	0.513792	-4.47278	FBgn0032429	CG5446
-0.907381	5.55009	-2.6283	0.0257871	0.515622	-4.41144	FBgn0011274	Dif
-0.410428	7.16275	-2.62575	0.0258988	0.515622	-4.48143	FBgn0030354	Upf1
-0.471369	10.3551	-2.61996	0.0261543	0.517876	-4.44523	FBgn0005585	Crc
2.31628	0.808119	2.61888	0.0262022	0.517876	-3.58529	FBgn0011554	etaTry
1.65115	0.938633	2.61699	0.0262867	0.517876	-3.64711	FBgn0030774	spheroide
-0.529877	3.81422	-2.61257	0.0264845	0.519243	-4.24635	FBgn0031549	Spindly
2.10578	-0.177507	2.61252	0.0264867	0.519243	-3.44152	FBgn0032433	Oatp33Ea
-0.521891	6.48149	-2.61017	0.0265924	0.519243	-4.49146	FBgn0032935	Atg18b
1.25683	1.43878	2.6091	0.0266406	0.519243	-3.77087	FBgn0039084	CG10175
-0.445966	9.49599	-2.609	0.0266452	0.519243	-4.48482	FBgn0250906	Pgk
1.38814	-0.201088	2.60029	0.0270419	0.523536	-3.48176	FBgn0051708	CG31708
2.78394	6.09382	2.60021	0.0270455	0.523536	-4.45299	FBgn0010357	betaTry
2.09529	3.65306	2.59916	0.0270936	0.523536	-4.17456	FBgn0085358	Diedel3
-0.481245	6.8515	-2.59843	0.0271269	0.523536	-4.52149	FBgn0263593	Lpin
3.77621	-3.17827	2.59755	0.0271677	0.523536	-3.24879	FBgn0085438	CG34409
0.485982	5.83751	2.59666	0.0272085	0.523536	-4.48619	FBgn0003748	Treh
0.560501	5.61449	2.59546	0.0272639	0.523536	-4.47453	FBgn0033304	Cyp6a13
0.522409	4.11979	2.59311	0.0273731	0.523653	-4.32629	FBgn0035266	Gk
-0.535442	4.90523	-2.59288	0.0273839	0.523653	-4.42123	FBgn0263110	CG43367
-1.17117	0.521261	-2.59006	0.0275149	0.524018	-3.63115	FBgn0000099	ap
0.917452	2.62441	2.59002	0.0275169	0.524018	-4.0472	FBgn0265045	Strn-Mlck
2.90078	3.12775	2.58821	0.0276016	0.524545	-4.05954	FBgn0028534	CG7916
2.51219	4.15147	2.5814	0.0279219	0.529399	-4.26605	FBgn0039342	CG5107
1.59822	-0.0296671	2.58034	0.0279722	0.529399	-3.53396	FBgn0026144	CBP
0.461138	5.99726	2.57892	0.0280398	0.52959	-4.52449	FBgn0033000	CG14464
1.25862	1.59138	2.57752	0.0281066	0.529649	-3.8531	FBgn0031913	CG5958
-0.490767	4.36449	-2.57644	0.0281581	0.529649	-4.3878	FBgn0027609	morgue
2.53612	1.15634	2.5751	0.0282219	0.529724	-3.71662	FBgn0038845	CG10827
-1.35515	0.0853367	-2.57395	0.0282773	0.529724	-3.57057	FBgn0030742	CG9919
0.62037	3.36913	2.56558	0.0286814	0.536202	-4.2441	FBgn0037445	CG9727
0.484608	7.69053	2.5634	0.0287873	0.536883	-4.59067	FBgn0038243	CG8066
-0.517908	10.0769	-2.56244	0.0288346	0.536883	-4.54872	FBgn0086355	Tpi
0.61305	4.76796	2.56064	0.0289226	0.537434	-4.4606	FBgn0016930	Dyrk2
1.53346	0.402936	2.55047	0.0294255	0.545678	-3.66086	FBgn0038341	AdamTS-A
2.99616	-3.38017	2.54864	0.0295169	0.54627	-3.31245	FBgn0001138	grn
-0.553925	8.45196	-2.54509	0.0296954	0.548471	-4.61468	FBgn0030955	CG6891
-0.442227	5.04402	-2.53865	0.030021	0.550207	-4.52571	FBgn0034923	Upf3
0.468904	9.94002	2.53773	0.0300679	0.550207	-4.59348	FBgn0028473	Non1
1.52617	0.431729	2.53655	0.0301283	0.550207	-3.68976	FBgn0029662	CG12206
2.99385	-3.00929	2.53533	0.0301906	0.550207	-3.32946	FBgn0035873	CG13670
-0.559524	4.38333	-2.53351	0.0302839	0.550207	-4.46087	FBgn0033166	Eaf
3.6618	-0.905832	2.53305	0.0303074	0.550207	-3.42342	FBgn0032373	Vha100-5
-0.442099	5.24736	-2.53227	0.0303477	0.550207	-4.55393	FBgn0038269	Rrp6
-1.19894	1.07457	-2.53222	0.0303503	0.550207	-3.82427	FBgn0030607	dob
-0.734763	2.5084	-2.53149	0.0303876	0.550207	-4.12397	FBgn0033627	CG13204
0.954601	2.23609	2.52769	0.0305841	0.552677	-4.07002	FBgn0051683	CG31683
0.623332	5.04201	2.52489	0.0307298	0.554221	-4.54715	FBgn0027621	Pfrx
-0.468341	4.35196	-2.5216	0.0309013	0.556224	-4.47802	FBgn0038462	CG17556
-0.519458	4.30383	-2.51861	0.0310583	0.557958	-4.47567	FBgn0036987	CG5274
1.69116	-0.524935	2.51546	0.0312248	0.559854	-3.55781	FBgn0038721	subdued
2.15462	-0.0534817	2.51016	0.0315067	0.562708	-3.62652	FBgn0039486	CG6074
1.51172	-0.869999	2.50825	0.0316087	0.562708	-3.52644	FBgn0263132	Cht6
1.80758	-0.515015	2.50631	0.0317128	0.562708	-3.5729	FBgn0020376	Sr-CIII
0.483053	6.85128	2.50566	0.0317477	0.562708	-4.67688	FBgn0050424	CG30424
-0.514612	10.3347	-2.50435	0.0318181	0.562708	-4.63927	FBgn0001092	Gapdh2
-0.397078	5.42428	-2.50434	0.0318186	0.562708	-4.61435	FBgn0028646	aralar1
-1.82169	-0.888998	-2.50333	0.0318733	0.562708	-3.52417	FBgn0011829	Ret
1.04275	2.83788	2.50179	0.0319563	0.562971	-4.23404	FBgn0265668	CG44475
-0.514233	4.10561	-2.49889	0.032114	0.562971	-4.48099	FBgn0004050	z
0.551254	5.15725	2.49888	0.0321146	0.562971	-4.60134	FBgn0038734	CG11453
-1.57287	0.647407	-2.4978	0.0321731	0.562971	-3.78234	FBgn0034085	Ptp52F
-0.396178	7.13745	-2.49445	0.0323566	0.564736	-4.70099	FBgn0036288	CG10660
-0.387124	5.54072	-2.49266	0.0324547	0.565376	-4.64196	FBgn0034858	eIF2B-delta
1.55062	0.334422	2.49143	0.0325222	0.56548	-3.73703	FBgn0030594	CG9509
2.27841	1.3162	2.49008	0.0325967	0.565706	-3.90743	FBgn0034160	CG5550
1.6404	1.19673	2.48333	0.0329716	0.570262	-3.91608	FBgn0003866	tsh
-0.897626	2.35106	-2.48287	0.0329972	0.570262	-4.16903	FBgn0054010	CG34010
-0.458667	7.3266	-2.48202	0.0330452	0.570262	-4.72412	FBgn0266518	Dpit47
-0.719034	4.01446	-2.47743	0.0333029	0.572624	-4.49953	FBgn0039109	CG10365
-0.485183	5.29093	-2.47626	0.0333689	0.572624	-4.65038	FBgn0035482	CG14985
-0.695824	2.19929	-2.47361	0.033519	0.572853	-4.15632	FBgn0038815	CG5466
-0.690005	3.20206	-2.47238	0.033589	0.572853	-4.36531	FBgn0028990	Spn27A
1.17647	0.176833	2.47197	0.0336123	0.572853	-3.7543	FBgn0040092	lectin-46Cb
0.95192	4.82114	2.47164	0.0336313	0.572853	-4.6092	FBgn0031630	CG15629
3.45874	-2.23996	2.4704	0.0337019	0.572995	-3.43018	FBgn0259111	Ndae1
-1.01959	2.8751	-2.46858	0.0338057	0.573699	-4.29559	FBgn0034756	Cyp6d2
1.41378	2.27034	2.46687	0.0339039	0.574305	-4.16349	FBgn0036622	CG4753
-0.402717	5.89102	-2.46386	0.034077	0.576176	-4.7113	FBgn0033050	Pngl
0.71	3.66881	2.4621	0.0341788	0.576801	-4.46792	FBgn0013683	mt:ND4L
2.62837	-1.23914	2.46105	0.0342393	0.576801	-3.52855	FBgn0260482	CG32599
1.38135	-0.340696	2.45726	0.0344602	0.578089	-3.68291	FBgn0035903	CG6765
-0.41016	5.47696	-2.45692	0.0344799	0.578089	-4.69689	FBgn0033448	hebe
-0.650907	4.76481	-2.4565	0.0345043	0.578089	-4.63231	FBgn0033437	CG12926
-0.505294	4.96524	-2.45292	0.0347141	0.580545	-4.66052	FBgn0039417	CG6073
1.05701	2.22021	2.44612	0.0351157	0.586197	-4.19755	FBgn0000210	br
1.25193	0.544293	2.4441	0.0352366	0.58622	-3.86456	FBgn0030485	CG1998
3.02553	1.67905	2.44307	0.0352975	0.58622	-4.00338	FBgn0035619	CG10592
0.537385	5.63815	2.44178	0.0353749	0.58622	-4.73247	FBgn0003891	tud
2.33944	0.192521	2.4409	0.0354274	0.58622	-3.76094	FBgn0038135	CG8773
1.46684	-0.831516	2.43944	0.0355151	0.58622	-3.63698	FBgn0038098	CG7381
-1.67489	-0.491251	-2.4384	0.0355778	0.58622	-3.68048	FBgn0036713	Mip
3.34542	-0.741737	2.43838	0.0355793	0.58622	-3.59438	FBgn0036806	Cyp12c1
-0.399588	6.67849	-2.43718	0.0356512	0.58622	-4.78663	FBgn0036811	MED11
-0.451685	4.85066	-2.43506	0.0357797	0.58622	-4.67923	FBgn0032819	CG10463
0.657609	3.46537	2.43455	0.0358104	0.58622	-4.47801	FBgn0035699	CG13300
1.00142	2.74932	2.42853	0.0361772	0.589996	-4.33758	FBgn0030775	CG9673
3.24072	-2.0195	2.42526	0.0363779	0.590968	-3.50215	FBgn0035070	CG3650
-0.453319	6.33139	-2.4248	0.0364063	0.590968	-4.79583	FBgn0036096	CG8003
-0.46577	6.47796	-2.42404	0.0364526	0.590968	-4.80217	FBgn0039665	CG2310
1.5746	0.550031	2.4232	0.0365046	0.590968	-3.88595	FBgn0037782	Npc2d
-0.383479	6.16921	-2.42208	0.0365738	0.590968	-4.79422	FBgn0034312	CG10916
2.02342	-1.19789	2.4213	0.0366223	0.590968	-3.60593	FBgn0016053	pgc
1.79238	-1.73871	2.41527	0.0369977	0.595981	-3.56262	FBgn0038250	CG3505
0.787604	5.91816	2.41118	0.0372546	0.59756	-4.79783	FBgn0003943	Ubi-p63E
0.52577	5.79272	2.41068	0.0372861	0.59756	-4.79335	FBgn0033261	udd
-0.86466	1.16889	-2.41061	0.0372906	0.59756	-4.04931	FBgn0040763	CG18336
2.68786	-1.06333	2.40772	0.0374733	0.599442	-3.62249	FBgn0038136	CG8774
2.23963	-1.40812	2.40327	0.0377563	0.601855	-3.60256	FBgn0000459	disco
1.10457	2.80876	2.40263	0.0377968	0.601855	-4.38765	FBgn0028950	CG15255
3.08355	-3.82222	2.40226	0.0378204	0.601855	-3.49847	FBgn0263656	CG43647
-1.22555	-0.0986754	-2.39998	0.0379668	0.602165	-3.81584	FBgn0038658	CG14292
2.81782	-2.4283	2.39962	0.0379898	0.602165	-3.5256	FBgn0036731	CG6333
2.84846	-2.74469	2.3989	0.0380363	0.602165	-3.51396	FBgn0028740	CG6362
0.57891	6.89849	2.39609	0.0382172	0.60399	-4.85944	FBgn0003328	scb
2.29559	-1.80608	2.39404	0.0383496	0.604117	-3.58059	FBgn0032402	CG14945
-2.70033	-2.23858	-2.39394	0.0383566	0.604117	-3.54245	FBgn0052105	CG32105
0.383048	9.2	2.39279	0.038431	0.604253	-4.85208	FBgn0025885	Inos
0.811637	2.16736	2.38992	0.0386182	0.606161	-4.2841	FBgn0033139	Tsp42Er
1.81775	-1.06475	2.38655	0.0388387	0.608584	-3.67778	FBgn0051973	Cda5
-0.68192	2.68806	-2.38523	0.0389251	0.6089	-4.40249	FBgn0050467	CG30467
0.772311	4.71669	2.38068	0.0392253	0.612554	-4.75114	FBgn0038063	Octbeta2R
-0.50281	5.72232	-2.3782	0.0393901	0.614084	-4.84266	FBgn0031820	DLP
2.29949	7.22759	2.37644	0.0395076	0.614874	-4.88163	FBgn0003863	alphaTry
-1.42115	0.154834	-2.37313	0.0397289	0.617274	-3.89736	FBgn0028562	sut2
1.89271	0.374762	2.37168	0.0398263	0.617744	-3.92109	FBgn0051259	CG31259
-0.355337	7.30785	-2.37052	0.039905	0.617922	-4.90875	FBgn0024833	AP-1mu
-1.58697	-1.2754	-2.36779	0.040089	0.619237	-3.68384	FBgn0264908	pHCl
2.7168	-3.4038	2.36727	0.0401245	0.619237	-3.54334	FBgn0030595	CG14406
2.75568	-2.70309	2.36366	0.0403695	0.620467	-3.56218	FBgn0037685	Or85f
-0.419387	5.12147	-2.36312	0.0404066	0.620467	-4.82376	FBgn0030724	Nipsnap
-0.383687	5.707	-2.36017	0.0406082	0.62193	-4.87191	FBgn0039581	Moca-cyp
0.821823	1.656	2.35975	0.0406371	0.62193	-4.22851	FBgn0037781	Fancl
-0.744565	4.15279	-2.35718	0.0408138	0.622849	-4.71711	FBgn0034741	CG4269
-0.637314	5.52882	-2.35691	0.0408325	0.622849	-4.86403	FBgn0036121	CG6310
0.441486	8.75701	2.35538	0.0409382	0.623426	-4.92385	FBgn0026409	Mpcp
0.776747	1.46875	2.35313	0.0410941	0.62393	-4.20189	FBgn0020379	Rfx
1.6092	-0.606101	2.35224	0.0411554	0.62393	-3.79952	FBgn0050187	CG30187
-0.679729	3.07837	-2.35197	0.0411748	0.62393	-4.53699	FBgn0266417	CG45057
1.06191	0.42057	2.34836	0.0414258	0.62396	-3.99765	FBgn0031365	CG17650
0.475017	6.30243	2.34766	0.0414754	0.62396	-4.92216	FBgn0013576	mtd
-0.554296	3.53252	-2.34693	0.0415266	0.62396	-4.63669	FBgn0033584	CG7737
3.25905	-3.5084	2.34672	0.0415412	0.62396	-3.57019	FBgn0028948	CG15253
5.23164	-1.24797	2.34628	0.0415717	0.62396	-3.61385	FBgn0051104	CG31104
0.59488	3.53806	2.34559	0.0416201	0.62396	-4.63879	FBgn0029710	CG3568
2.02507	6.71242	2.34453	0.0416947	0.62396	-4.9256	FBgn0035665	Jon65Aiii
0.500662	4.74079	2.3441	0.0417253	0.62396	-4.81729	FBgn0019643	Dat
1.65013	5.55833	2.34283	0.0418147	0.62396	-4.87488	FBgn0035670	CG10472
-2.22653	-2.66964	-2.34209	0.0418665	0.62396	-3.59645	FBgn0039425	CG5432
1.8017	0.996371	2.34103	0.0419419	0.62396	-4.09401	FBgn0033760	CG8785
-0.344187	7.8357	-2.34034	0.0419908	0.62396	-4.9613	FBgn0010278	Ssrp
0.484571	4.64233	2.33737	0.0422017	0.625404	-4.8179	FBgn0026402	NiPp1
-0.600404	5.44504	-2.33637	0.0422728	0.625404	-4.89204	FBgn0264895	RapGAP1
0.620496	3.18327	2.3361	0.0422919	0.625404	-4.58639	FBgn0004919	gol
0.539185	3.3025	2.33394	0.0424462	0.626678	-4.61494	FBgn0027601	pdgy
0.677205	5.13076	2.33087	0.0426667	0.62771	-4.87525	FBgn0036801	MYPT-75D
0.424993	6.06213	2.33023	0.0427131	0.62771	-4.94029	FBgn0035469	CG14977
1.76483	-0.46542	2.33012	0.0427208	0.62771	-3.85001	FBgn0036849	CG14079
-1.54401	-1.02628	-2.32784	0.0428857	0.629128	-3.77456	FBgn0010109	dpn
-0.444389	7.0209	-2.32357	0.0431953	0.631655	-4.98134	FBgn0030007	CG2263
1.09112	1.3255	2.31992	0.043462	0.631702	-4.22061	FBgn0003701	thr
2.82153	-2.66803	2.31667	0.0437009	0.631702	-3.62676	FBgn0261799	dsx-c73A
0.489237	4.58658	2.31655	0.0437098	0.631702	-4.84532	FBgn0032006	Pvr
-1.28426	-0.37626	-2.31648	0.0437152	0.631702	-3.89775	FBgn0037742	Rpt3R
0.676403	1.98884	2.31552	0.0437861	0.631702	-4.36919	FBgn0033785	Sans
2.6174	-3.51108	2.31253	0.0440067	0.631702	-3.61188	FBgn0000179	bi
1.95909	-1.92196	2.31196	0.044049	0.631702	-3.69217	FBgn0263353	CG11000
0.423381	5.02789	2.31192	0.0440519	0.631702	-4.89936	FBgn0035227	CG12090
2.1035	-1.88957	2.31164	0.0440731	0.631702	-3.69176	FBgn0039886	CG2003
-0.675908	3.97454	-2.31001	0.0441945	0.631702	-4.7683	FBgn0085223	CG34194
-0.434031	7.86881	-2.30978	0.0442111	0.631702	-5.01092	FBgn0011768	Fdh
-2.14956	-0.96255	-2.30775	0.0443632	0.631702	-3.79997	FBgn0041225	Gr94a
0.918513	2.38328	2.30666	0.0444444	0.631702	-4.45983	FBgn0036896	wnd
0.715229	4.27476	2.30461	0.0445983	0.631702	-4.82199	FBgn0032123	Oatp30B
3.37428	-2.85038	2.30417	0.0446313	0.631702	-3.63076	FBgn0051636	CG31636
-0.370252	7.23015	-2.30327	0.0446989	0.631702	-5.01798	FBgn0038948	PSR
0.524468	4.928	2.30215	0.0447837	0.631702	-4.90504	FBgn0037074	CG7324
1.54654	3.38368	2.30175	0.0448141	0.631702	-4.65166	FBgn0030929	CG15043
-0.445813	4.38814	-2.3013	0.0448477	0.631702	-4.84616	FBgn0000251	cad
-0.457783	8.66946	-2.30059	0.0449016	0.631702	-5.01531	FBgn0023477	Tal
-0.346303	8.30463	-2.29998	0.0449479	0.631702	-5.02311	FBgn0037643	skap
-0.371071	9.18317	-2.29589	0.0452586	0.631702	-5.01147	FBgn0031381	Npc2a
0.768201	2.0984	2.29554	0.0452848	0.631702	-4.42263	FBgn0260004	Snmp1
0.469279	4.79307	2.2952	0.0453111	0.631702	-4.90313	FBgn0036279	Ncc69
-0.345515	7.56202	-2.29391	0.0454099	0.631702	-5.03663	FBgn0034876	wmd
0.852496	3.42666	2.2917	0.0455791	0.631702	-4.69892	FBgn0013685	mt:ND6
2.5193	3.92853	2.29091	0.0456395	0.631702	-4.70397	FBgn0039472	CG17192
1.37102	-0.437692	2.28992	0.0457156	0.631702	-3.9236	FBgn0031693	Cyp4ac1
-0.979591	0.649033	-2.2885	0.0458253	0.631702	-4.13821	FBgn0082585	sprt
0.6315	2.47086	2.28842	0.045831	0.631702	-4.5152	FBgn0027512	CG10254
0.384894	7.06295	2.28781	0.0458784	0.631702	-5.04065	FBgn0035252	CG7970
2.7466	-1.90458	2.28746	0.0459054	0.631702	-3.71234	FBgn0035317	Oseg2
-0.73523	2.35032	-2.28734	0.0459146	0.631702	-4.48985	FBgn0030638	CG11655
-1.20476	-0.569464	-2.28641	0.0459869	0.631702	-3.9125	FBgn0036970	Spn77Bc
1.08034	0.681035	2.28513	0.0460858	0.631702	-4.14859	FBgn0002878	mus101
2.42597	4.60442	2.28489	0.0461048	0.631702	-4.84028	FBgn0028920	CG8997
2.11278	-2.08635	2.28426	0.0461535	0.631702	-3.71385	FBgn0034397	CG15082
0.563202	4.53064	2.28261	0.0462821	0.631702	-4.89324	FBgn0030960	Atg101
1.35733	-1.07372	2.2821	0.0463217	0.631702	-3.84009	FBgn0052055	CG32055
2.57342	-2.70483	2.28077	0.0464255	0.631702	-3.6729	FBgn0010383	Cyp18a1
-0.428003	4.55585	-2.27982	0.0464997	0.631702	-4.9018	FBgn0017482	T3dh
-0.504073	5.67852	-2.27822	0.0466252	0.631702	-5.00353	FBgn0041607	asparagine-synthetase
-1.05197	2.70509	-2.27808	0.0466363	0.631702	-4.56795	FBgn0039098	GILT3
2.96881	-3.76826	2.27751	0.0466809	0.631702	-3.65535	FBgn0038851	dmrt93B
1.77418	-1.36369	2.27674	0.0467411	0.631702	-3.80325	FBgn0039501	CG5987
2.73433	-2.78736	2.27618	0.0467855	0.631702	-3.67326	FBgn0010258	Rbp4
-1.17099	0.299521	-2.27586	0.0468109	0.631702	-4.08434	FBgn0039043	CG17121
0.481972	5.09077	2.27535	0.0468508	0.631702	-4.96411	FBgn0031893	CG4495
0.887601	2.4315	2.27459	0.0469112	0.631702	-4.52407	FBgn0036319	Ent3
-0.483	3.89744	-2.27448	0.0469193	0.631702	-4.81764	FBgn0260027	CG42495
3.16022	-1.86993	2.27101	0.0471946	0.631702	-3.73081	FBgn0037128	CG14572
-0.555731	3.64602	-2.2704	0.0472429	0.631702	-4.78071	FBgn0262738	norpA
1.85998	-2.11491	2.27029	0.0472515	0.631702	-3.73567	FBgn0040906	CG15579
0.622891	6.06118	2.26685	0.0475261	0.631702	-5.04275	FBgn0086347	Myo31DF
0.38258	6.75824	2.26637	0.0475643	0.631702	-5.06938	FBgn0038353	CG5399
-0.581406	3.53133	-2.26541	0.0476412	0.631702	-4.7684	FBgn0013275	Hsp70Aa
2.10336	7.6693	2.26501	0.0476728	0.631702	-5.07058	FBgn0250815	Jon65Aiv
1.86998	-0.660516	2.26401	0.0477536	0.631702	-3.91856	FBgn0029659	CG16782
1.35255	-0.615737	2.26401	0.0477537	0.631702	-3.93593	FBgn0029994	CG2254
-0.863467	4.35748	-2.26328	0.0478123	0.631702	-4.89714	FBgn0261808	cu
0.665664	3.88276	2.26268	0.0478603	0.631702	-4.83156	FBgn0034406	Jheh3
2.28014	-2.16883	2.26081	0.0480113	0.631702	-3.73824	FBgn0053258	CG33258
1.14109	0.0300632	2.25866	0.048185	0.631702	-4.0622	FBgn0036503	CG13454
0.46339	4.46233	2.25753	0.0482765	0.631702	-4.92687	FBgn0034271	CG4996
-0.406616	5.63857	-2.25733	0.0482931	0.631702	-5.03545	FBgn0031317	CG5118
3.13032	-1.80595	2.25458	0.0485163	0.631702	-3.75865	FBgn0034293	CG14495
-1.15276	1.5612	-2.2544	0.0485312	0.631702	-4.36803	FBgn0038530	AttD
2.13138	-0.19788	2.25396	0.0485674	0.631702	-3.99834	FBgn0031930	CG7025
0.561969	6.08834	2.2539	0.048572	0.631702	-5.06535	FBgn0039118	CG10208
0.39644	5.62892	2.25205	0.0487235	0.631702	-5.04375	FBgn0036199	Bmcp
-0.41711	4.4682	-2.25177	0.0487466	0.631702	-4.93682	FBgn0031868	Rat1
0.486501	3.77068	2.25121	0.048792	0.631702	-4.83492	FBgn0035039	CG3608
1.31196	1.65733	2.25101	0.0488085	0.631702	-4.39037	FBgn0000489	Pka-C3
0.9062	1.39921	2.25072	0.0488324	0.631702	-4.34821	FBgn0031746	CG9029
0.615667	4.86214	2.25	0.0488918	0.631702	-4.98232	FBgn0003041	pbl
-1.49096	-0.944637	-2.24813	0.0490455	0.631702	-3.90752	FBgn0085282	CG34253
2.11241	2.11686	2.24802	0.0490544	0.631702	-4.46387	FBgn0028533	CG7953
1.552	-0.750517	2.24699	0.0491395	0.631702	-3.93619	FBgn0032345	CG14921
0.618495	4.2328	2.24644	0.0491849	0.631702	-4.91185	FBgn0050287	CG30287
-2.35228	-0.947178	-2.24547	0.0492654	0.631702	-3.88962	FBgn0020300	gk
-0.947227	1.06278	-2.24492	0.049311	0.631702	-4.28826	FBgn0042110	CG18765
-0.435707	8.76945	-2.24376	0.0494072	0.632054	-5.1056	FBgn0003888	betaTub60D
2.53713	2.97504	2.24248	0.0495135	0.632535	-4.61834	FBgn0035666	Jon65Aii
1.66357	-0.600502	2.23967	0.0497474	0.634042	-3.96543	FBgn0003423	slgA
0.961204	2.25881	2.23769	0.0499136	0.634042	-4.5454	FBgn0052633	CG32633
-0.445566	4.72047	-2.23753	0.0499271	0.634042	-4.98892	FBgn0030631	CG6227
-1.65514	-1.67877	-2.23719	0.0499553	0.634042	-3.82576	FBgn0050081	Ir51b
1.90967	-2.06556	2.23694	0.0499762	0.634042	-3.78506	FBgn0037222	CG14642
-0.410246	6.52964	-2.23424	0.0502039	0.635885	-5.11485	FBgn0051549	CG31549
0.354296	7.73157	2.23358	0.0502596	0.635885	-5.13527	FBgn0034417	CG15117
0.601899	5.33886	2.23195	0.0503968	0.6363	-5.05434	FBgn0052479	CG32479
0.7518	2.92169	2.23049	0.0505208	0.6363	-4.70103	FBgn0015269	Nf1
-0.738815	2.75096	-2.23036	0.0505318	0.6363	-4.66575	FBgn0051092	LpR2
0.618677	3.39776	2.22992	0.0505692	0.6363	-4.79979	FBgn0000247	ca
3.20626	-1.52772	2.22907	0.0506414	0.636339	-3.81763	FBgn0031865	Nha1
3.10716	-0.658887	2.22784	0.050746	0.636782	-3.92631	FBgn0031141	CG1304
0.687691	2.8856	2.22572	0.0509268	0.637811	-4.70262	FBgn0053056	CG33056
3.1926	-0.739838	2.22526	0.0509666	0.637811	-3.91001	FBgn0029828	CG6067
2.81551	-2.46083	2.2238	0.0510916	0.638507	-3.75903	FBgn0051015	PH4alphaPV
1.20728	-0.0613667	2.22253	0.0512007	0.638541	-4.0973	FBgn0050286	CG30286
0.439339	4.18952	2.22215	0.0512332	0.638541	-4.94753	FBgn0037715	CG9399
0.386573	4.81092	2.21896	0.0515082	0.641099	-5.02923	FBgn0038651	CG14299
-0.519977	4.09455	-2.21335	0.0519952	0.646286	-4.94631	FBgn0032614	CG13284
-2.77835	-2.33628	-2.21088	0.0522114	0.648098	-3.78568	FBgn0085410	TrissinR
3.20425	-3.4994	2.20904	0.0523724	0.648575	-3.74479	FBgn0039850	CG11333
-0.393552	5.91552	-2.20883	0.0523909	0.648575	-5.13035	FBgn0038810	Srp72
-0.371	6.78964	-2.2075	0.0525079	0.64915	-5.1653	FBgn0020305	dbe
0.513662	7.60721	2.20575	0.0526624	0.649641	-5.17938	FBgn0000463	Dl
-0.445934	6.20664	-2.20544	0.0526902	0.649641	-5.14953	FBgn0034488	CG11208
0.400629	12.2933	2.20465	0.0527595	0.649641	-5.07763	FBgn0028697	RpL15
-1.6894	-1.12891	-2.20235	0.0529639	0.651061	-3.9445	FBgn0031907	CG5171
-2.16944	-1.58004	-2.20015	0.0531595	0.651061	-3.87864	FBgn0025642	CG32812
-0.476213	4.31041	-2.19903	0.0532591	0.651061	-5.00067	FBgn0035896	CG6983
-0.420447	7.07648	-2.19779	0.0533703	0.651061	-5.18656	FBgn0036035	CG18178
2.77057	-2.55747	2.1948	0.0536386	0.653467	-3.79331	FBgn0020258	ppk
0.557351	3.02339	2.19178	0.0539104	0.65591	-4.78805	FBgn0031990	CG8552
0.371525	5.41164	2.18349	0.0546647	0.662486	-5.13943	FBgn0064766	CG7600
0.996167	3.03088	2.1831	0.0547001	0.662486	-4.79004	FBgn0037146	CG7470
2.61328	-2.98258	2.18254	0.0547516	0.662486	-3.78879	FBgn0038248	CG7886
-0.584117	2.93974	-2.18249	0.0547557	0.662486	-4.78476	FBgn0036988	CG5262
0.77462	2.3666	2.18175	0.0548238	0.662486	-4.66088	FBgn0031051	Ranbp21
0.490963	4.34111	2.18111	0.054883	0.662486	-5.03385	FBgn0051729	CG31729
-2.68745	-2.11397	-2.17949	0.0550318	0.663411	-3.84388	FBgn0039681	CG7582
-2.65528	-3.48363	-2.17843	0.0551298	0.663522	-3.78086	FBgn0030661	CG8105
1.88832	-1.07424	2.17753	0.0552123	0.663522	-3.98098	FBgn0036821	CG3961
0.39308	6.71707	2.17705	0.0552574	0.663522	-5.21264	FBgn0050414	CG30414
-0.919228	1.48355	-2.17557	0.0553938	0.663933	-4.48206	FBgn0000591	E(spl)m8-HLH
-0.422575	7.05668	-2.17512	0.055436	0.663933	-5.22266	FBgn0027569	cert
0.44095	4.14023	2.1709	0.0558289	0.664688	-5.02255	FBgn0039430	CG5455
-0.401494	8.03833	-2.17074	0.055844	0.664688	-5.23524	FBgn0001124	Got1
2.69179	-2.3041	2.17024	0.0558907	0.664688	-3.84419	FBgn0039479	CG14257
0.539291	5.62861	2.16863	0.0560414	0.664688	-5.1774	FBgn0037705	mura
0.865242	1.59109	2.16862	0.0560418	0.664688	-4.51889	FBgn0037897	CG5270
0.685899	1.74022	2.16804	0.0560966	0.664688	-4.55229	FBgn0030351	CG1840
-0.54804	5.09841	-2.16748	0.0561495	0.664688	-5.1382	FBgn0034854	Golgin245
3.67183	-3.23366	2.16655	0.056237	0.664869	-3.80329	FBgn0001285	Jon44E
-0.39592	4.9411	-2.16098	0.0567631	0.670227	-5.13505	FBgn0029957	CG12155
-0.69083	8.6351	-2.15906	0.0569459	0.67032	-5.24434	FBgn0038842	hdly
-0.456593	5.63078	-2.15813	0.0570343	0.67032	-5.19446	FBgn0004913	Gnf1
-0.363491	8.40155	-2.15808	0.0570389	0.67032	-5.25093	FBgn0014189	Hel25E
1.39457	0.187938	2.15784	0.0570624	0.67032	-4.23531	FBgn0028482	CG16857
-0.411556	6.22272	-2.15409	0.057421	0.673671	-5.23274	FBgn0053138	AGBE
1.645	-1.61649	2.15234	0.0575896	0.674788	-3.95438	FBgn0039862	kek6
2.36729	-0.781993	2.14935	0.0578777	0.675812	-4.05094	FBgn0034198	CG11400
0.988055	0.852786	2.14863	0.0579476	0.675812	-4.39545	FBgn0032981	CG3635
0.338826	5.69401	2.1473	0.0580768	0.675812	-5.21663	FBgn0038809	CG16953
0.421075	6.38505	2.14642	0.0581616	0.675812	-5.25153	FBgn0031992	CG8498
2.58381	5.33295	2.14538	0.0582627	0.675812	-5.14084	FBgn0039471	CG6295
-0.388896	6.53361	-2.14242	0.058552	0.675812	-5.2626	FBgn0038046	CG5641
2.63098	-2.47919	2.14237	0.0585569	0.675812	-3.86955	FBgn0038402	Fer2
0.816636	3.06039	2.1422	0.0585731	0.675812	-4.86659	FBgn0050043	CG30043
1.1294	0.977441	2.14169	0.0586236	0.675812	-4.42747	FBgn0261053	Cad86C
0.521076	3.0522	2.14156	0.0586362	0.675812	-4.87388	FBgn0010435	emp
-0.593523	2.80653	-2.14128	0.0586638	0.675812	-4.82137	FBgn0004379	Klp67A
2.30055	2.5342	2.14088	0.0587022	0.675812	-4.69211	FBgn0030688	CG8952
0.892089	2.19576	2.14066	0.0587243	0.675812	-4.68653	FBgn0039272	CG11836
0.740227	2.71185	2.1401	0.058779	0.675812	-4.7995	FBgn0085390	Dgk
-0.40814	7.17925	-2.13798	0.0589872	0.676636	-5.28404	FBgn0034091	mrj
-0.379885	6.50617	-2.13733	0.0590519	0.676636	-5.26991	FBgn0025680	cry
2.6448	2.35671	2.13695	0.0590892	0.676636	-4.65434	FBgn0031654	Jon25Bii
2.9322	-3.18613	2.1349	0.0592914	0.676636	-3.84032	FBgn0035328	yellow-g2
0.615912	2.8336	2.13382	0.059399	0.676636	-4.83838	FBgn0029608	CG3091
1.93209	-2.40783	2.13261	0.0595189	0.676636	-3.89906	FBgn0262562	CG43102
-1.19105	0.932403	-2.13251	0.059529	0.676636	-4.42809	FBgn0029843	Nep1
-0.613738	8.27842	-2.13119	0.0596605	0.676636	-5.29493	FBgn0085227	CG34198
0.418343	7.74856	2.13106	0.0596736	0.676636	-5.29969	FBgn0033153	Gadd45
0.378881	5.62056	2.13104	0.059675	0.676636	-5.23771	FBgn0034963	Not11
0.589184	3.53759	2.13069	0.05971	0.676636	-4.98473	FBgn0035229	CG7852
0.806837	1.03992	2.13046	0.0597335	0.676636	-4.46807	FBgn0262508	CG43078
1.20771	-0.407818	2.12904	0.059875	0.677319	-4.17719	FBgn0031451	CG9961
-0.760913	1.38569	-2.12807	0.0599722	0.677319	-4.54114	FBgn0027111	miple
-0.387147	5.48713	-2.12764	0.0600146	0.677319	-5.23366	FBgn0031062	CG14230
-0.390974	4.70882	-2.12654	0.060125	0.677733	-5.16596	FBgn0036373	Tgi
0.468611	6.2415	2.12578	0.0602013	0.677762	-5.27849	FBgn0261862	whd
1.43077	-1.0838	2.12442	0.0603382	0.678473	-4.06819	FBgn0038014	CG10041
0.59305	4.02459	2.12157	0.0606258	0.680044	-5.08123	FBgn0040336	Seipin
-0.459718	4.55936	-2.1194	0.0608456	0.681013	-5.15953	FBgn0036501	CG7272
0.475687	4.59695	2.11856	0.0609309	0.681013	-5.16547	FBgn0038057	CG12267
2.86076	-2.07622	2.11853	0.0609343	0.681013	-3.93246	FBgn0259741	CG42395
-1.02933	0.347615	-2.11316	0.061482	0.685667	-4.34917	FBgn0032891	Oseg5
-0.530062	2.93206	-2.11299	0.0614998	0.685667	-4.89391	FBgn0033806	FLASH
0.959318	5.27582	2.11222	0.0615789	0.685717	-5.23637	FBgn0040827	CG13315
0.753073	2.54439	2.1083	0.0619825	0.689378	-4.81372	FBgn0259734	CG42388
-0.402025	5.13397	-2.10744	0.0620713	0.689531	-5.23793	FBgn0039013	CG4813
-0.467991	5.87886	-2.10396	0.0624319	0.6914	-5.29561	FBgn0266420	Ote
-1.1117	0.347203	-2.10371	0.0624583	0.6914	-4.36209	FBgn0001983	wor
-0.315742	8.51109	-2.10319	0.0625122	0.6914	-5.3364	FBgn0031489	CG17224
0.556259	5.65212	2.10292	0.0625402	0.6914	-5.28338	FBgn0036732	Oatp74D
-1.4461	-1.40281	-2.10198	0.0626388	0.691659	-4.05645	FBgn0260446	GABA-B-R1
0.928818	1.50686	2.10004	0.0628416	0.692084	-4.60584	FBgn0063491	GstE9
1.05637	2.16223	2.09996	0.0628501	0.692084	-4.73865	FBgn0012037	Ance
-0.643555	2.47719	-2.09879	0.0629721	0.692084	-4.81711	FBgn0032934	CG8679
2.71015	-1.81196	2.09873	0.0629783	0.692084	-3.98056	FBgn0053966	CG33966
0.636398	6.40064	2.0979	0.0630654	0.692214	-5.32811	FBgn0264894	CG44085
0.918448	3.20443	2.09524	0.0633457	0.693635	-4.96634	FBgn0052695	CG32695
0.584237	6.79023	2.0917	0.0637197	0.695987	-5.34981	FBgn0063494	GstE6
-2.39693	-3.45022	-2.09045	0.0638526	0.695987	-3.89066	FBgn0005636	nvy
-0.597812	5.46829	-2.09035	0.0638631	0.695987	-5.28979	FBgn0036945	Ssk
-0.406073	9.88672	-2.0887	0.0640391	0.697078	-5.32739	FBgn0038826	Syp
-0.367698	4.93106	-2.0856	0.0643707	0.698938	-5.25392	FBgn0036734	CG7564
2.69571	-2.52614	2.08548	0.064383	0.698938	-3.94103	FBgn0262605	CG43131
-0.492029	4.15369	-2.08497	0.0644379	0.698938	-5.1604	FBgn0015391	glu
2.36952	-2.36662	2.08179	0.0647801	0.701316	-3.9636	FBgn0035157	CG13894
0.96292	4.1087	2.08083	0.0648834	0.701316	-5.15079	FBgn0003984	vn
2.88458	-1.28826	2.08081	0.0648858	0.701316	-4.06705	FBgn0034783	CG9825
-0.471945	7.63485	-2.07997	0.0649758	0.701464	-5.38025	FBgn0034709	Swim
0.698808	5.60541	2.07866	0.065118	0.702175	-5.31774	FBgn0037906	PGRP-LB
-2.32687	-2.34497	-2.07638	0.065365	0.70317	-3.97509	FBgn0040377	Vha36-3
-0.363891	7.56863	-2.07634	0.0653693	0.70317	-5.38599	FBgn0260659	CG42542
-1.57845	-1.81524	-2.07527	0.0654855	0.70317	-4.04062	FBgn0031538	CG3246
0.369249	6.55838	2.07267	0.0657701	0.704409	-5.37441	FBgn0015924	crq
-1.04159	-0.301078	-2.07177	0.0658676	0.704409	-4.28428	FBgn0038179	CG9312
0.516601	3.01866	2.07084	0.0659701	0.704409	-4.97867	FBgn0023081	gek
-2.52774	-3.41167	-2.07066	0.0659901	0.704409	-3.91648	FBgn0053147	Hs3st-A
-0.40606	3.89409	-2.07034	0.0660251	0.704409	-5.1444	FBgn0039740	CG7928
1.06578	1.84618	2.06948	0.0661192	0.704409	-4.72128	FBgn0263220	Hk
0.929196	2.264	2.06765	0.0663202	0.704409	-4.81383	FBgn0014135	bnl
-0.615734	3.48321	-2.06724	0.0663659	0.704409	-5.07383	FBgn0041627	Ku80
-0.430348	4.79039	-2.06705	0.0663865	0.704409	-5.26827	FBgn0032790	CG10194
-0.401094	4.99612	-2.06591	0.0665128	0.704409	-5.29095	FBgn0025390	Mur2B
0.447347	3.4593	2.06453	0.0666653	0.704409	-5.07667	FBgn0028499	CG7985
0.376469	4.22113	2.06442	0.0666778	0.704409	-5.20385	FBgn0029736	CG4041
1.98831	-2.70919	2.06424	0.0666973	0.704409	-3.96421	FBgn0038487	TwdlW
-0.406341	4.61318	-2.06418	0.0667037	0.704409	-5.25338	FBgn0058160	CG40160
-0.399646	3.76291	-2.06332	0.0667993	0.70461	-5.13358	FBgn0032486	CG5705
-0.356329	6.74119	-2.06117	0.0670389	0.705475	-5.39727	FBgn0003076	Pgm
0.401591	4.62212	2.05561	0.0676598	0.71007	-5.26837	FBgn0035235	CG7879
1.97672	-1.76823	2.05434	0.0678027	0.71007	-4.06605	FBgn0033484	CG2269
0.6345	2.22657	2.05331	0.0679188	0.71007	-4.83442	FBgn0037142	CG14562
1.15154	-0.585127	2.05316	0.0679356	0.71007	-4.25866	FBgn0025687	LKR
0.365307	5.6633	2.05249	0.0680117	0.71007	-5.36461	FBgn0039149	CG18428
-0.478391	8.03214	-2.05175	0.0680947	0.71013	-5.42378	FBgn0036824	CG3902
-0.400762	5.02061	-2.05023	0.0682675	0.710401	-5.31787	FBgn0035405	pfk
-2.66609	-3.07672	-2.04947	0.0683535	0.710401	-3.95426	FBgn0053710	CG33710
1.52968	5.41437	2.04802	0.0685184	0.710401	-5.33856	FBgn0034295	CG10911
-1.51468	-0.933812	-2.04779	0.0685441	0.710401	-4.20182	FBgn0033501	CG12911
2.69422	-2.48984	2.0471	0.068623	0.710401	-3.99696	FBgn0030961	CG7058
-0.877021	1.70807	-2.04676	0.0686613	0.710401	-4.72898	FBgn0002569	Mal-A2
-0.737403	1.98339	-2.04529	0.0688292	0.710448	-4.79222	FBgn0024980	Syx4
-0.429768	5.06576	-2.0444	0.068931	0.710448	-5.33098	FBgn0014163	fax
0.884862	0.700385	2.04405	0.0689701	0.710448	-4.52935	FBgn0266579	tau
-0.366614	4.66887	-2.04323	0.0690647	0.710448	-5.29309	FBgn0001990	wek
2.04569	-2.91457	2.04266	0.0691293	0.710448	-3.97774	FBgn0051068	CG31068
-0.432469	4.50855	-2.04055	0.0693725	0.712152	-5.27798	FBgn0033784	CG13322
-1.43678	-1.06966	-2.03546	0.0699599	0.716583	-4.19773	FBgn0038261	CG14856
1.01323	-0.27929	2.03452	0.0700694	0.716905	-4.34487	FBgn0038865	CG10824
-0.397073	4.01701	-2.03352	0.0701856	0.716946	-5.22152	FBgn0027574	CG5815
-0.766744	1.90222	-2.03228	0.070329	0.716946	-4.79491	FBgn0004133	blow
2.76673	-2.79965	2.03115	0.0704618	0.716946	-3.99044	FBgn0030509	CG11162
0.524725	3.24687	2.03098	0.0704807	0.716946	-5.08699	FBgn0040344	CG3711
3.61139	-0.566751	2.03052	0.0705349	0.716946	-4.20703	FBgn0031034	CG14205
1.98622	-1.68047	2.03047	0.070541	0.716946	-4.113	FBgn0039470	CG6296
-0.362736	5.5343	-2.02924	0.0706844	0.717611	-5.39219	FBgn0035754	MED4
1.3572	-1.48065	2.02737	0.070904	0.718842	-4.15235	FBgn0040532	CG8369
-0.582512	3.11881	-2.02688	0.070962	0.718842	-5.06631	FBgn0030360	CG1806
-0.413477	5.8527	-2.02582	0.0710866	0.719312	-5.41732	FBgn0000541	E(bx)
-0.354638	4.62991	-2.02324	0.0713903	0.719389	-5.3198	FBgn0051658	Nnf1b
1.22898	-0.749305	2.02304	0.0714145	0.719389	-4.27224	FBgn0033696	Cyp6g2
0.392002	7.26085	2.0227	0.0714544	0.719389	-5.4672	FBgn0038484	CG5246
0.693955	2.99973	2.02249	0.0714791	0.719389	-5.04757	FBgn0031077	CG15618
-0.333562	5.34512	-2.02171	0.0715721	0.719389	-5.39034	FBgn0031401	papi
0.425522	4.51288	2.02058	0.0717063	0.719389	-5.31003	FBgn0029911	CG14435
0.484025	4.5705	2.02046	0.0717199	0.719389	-5.31646	FBgn0030869	Socs16D
1.86663	-1.2528	2.01857	0.0719452	0.720863	-4.18623	FBgn0260657	CG42540
0.515163	2.66897	2.01313	0.0725955	0.722821	-4.99332	FBgn0040262	Ugt36Ba
0.505222	3.60918	2.01227	0.0726991	0.722821	-5.18497	FBgn0044452	Atg2
2.08509	-2.75109	2.01123	0.0728232	0.722821	-4.02931	FBgn0033112	Spn42Db
0.46049	5.64736	2.01106	0.0728443	0.722821	-5.42786	FBgn0031374	CG7337
1.33984	-1.3837	2.00907	0.0730839	0.722821	-4.19266	FBgn0033876	Syngr
-0.390871	5.19542	-2.00829	0.0731788	0.722821	-5.39886	FBgn0036850	Gem2
1.60598	-2.16553	2.00717	0.0733139	0.722821	-4.09404	FBgn0032603	CG17928
2.06358	-0.702205	2.00601	0.0734555	0.722821	-4.28213	FBgn0040069	vanin-like
-0.395152	4.25319	-2.00551	0.0735155	0.722821	-5.29973	FBgn0037315	Cerk
0.587299	3.81071	2.00542	0.0735265	0.722821	-5.22937	FBgn0263782	Hmgcr
0.687678	2.27674	2.0053	0.0735407	0.722821	-4.91809	FBgn0019952	Orct
0.481563	2.97809	2.00517	0.0735575	0.722821	-5.07285	FBgn0261049	Vps45
0.389082	6.61739	2.00506	0.0735706	0.722821	-5.48187	FBgn0051992	gw
0.531663	2.96439	2.00422	0.0736723	0.722821	-5.0704	FBgn0261393	alpha-Est5
1.91499	-1.79919	2.00389	0.0737123	0.722821	-4.13315	FBgn0032122	CG31883
-2.07017	-2.16676	-2.00245	0.0738891	0.723782	-4.0922	FBgn0036369	CG10089
0.635374	4.3856	2.00118	0.0740443	0.723885	-5.32194	FBgn0033246	ACC
-0.317466	5.71911	-1.99787	0.07445	0.726955	-5.45325	FBgn0033998	row
2.85022	-3.49251	1.99359	0.0749781	0.730069	-4.00998	FBgn0085431	CG34402
2.54768	4.98146	1.99305	0.0750452	0.730069	-5.33861	FBgn0023197	Jon74E
1.22552	-0.485771	1.9918	0.0751999	0.730069	-4.36265	FBgn0051174	CG31174
-0.308128	6.05372	-1.99169	0.075214	0.730069	-5.48134	FBgn0030431	CG4407
0.59942	7.21855	1.99155	0.075231	0.730069	-5.51453	FBgn0035625	Blimp-1
0.30329	6.76607	1.99132	0.0752602	0.730069	-5.50717	FBgn0033226	CG1882
1.35552	2.05857	1.9907	0.0753362	0.730069	-4.87503	FBgn0051343	CG31343
-0.348265	4.32872	-1.98974	0.0754564	0.730069	-5.33466	FBgn0026878	CG4325
0.921342	8.8099	1.98867	0.0755897	0.730069	-5.50918	FBgn0046114	Gclm
-0.410847	5.54756	-1.98866	0.0755911	0.730069	-5.45598	FBgn0040283	SMC1
0.597143	6.52052	1.98825	0.0756421	0.730069	-5.50423	FBgn0002868	MtnA
0.313589	6.16212	1.98399	0.0761751	0.734443	-5.49828	FBgn0028671	Vha100-1
-0.360401	6.36802	-1.98224	0.0763952	0.735794	-5.50904	FBgn0039110	RanBP3
0.491663	3.62018	1.98001	0.0766769	0.73634	-5.23688	FBgn0033540	Elp2
-0.37222	11.7602	-1.97964	0.0767245	0.73634	-5.44822	FBgn0001149	GstD1
1.43825	-0.917623	1.97939	0.0767553	0.73634	-4.30214	FBgn0031184	CG14615
-0.350775	6.6607	-1.97917	0.0767833	0.73634	-5.52303	FBgn0021875	Zfrp8
1.89014	1.58725	1.97689	0.0770726	0.73634	-4.77334	FBgn0034664	CG4377
0.928491	0.877713	1.97681	0.0770833	0.73634	-4.66608	FBgn0039927	CG11155
0.780328	0.529709	1.9762	0.0771603	0.73634	-4.59826	FBgn0013811	Dhc62B
0.892762	1.83522	1.97597	0.0771898	0.73634	-4.8638	FBgn0031182	Cyp6t1
-0.409358	4.13035	-1.97582	0.0772089	0.73634	-5.32795	FBgn0085408	Shroom
1.23601	0.275513	1.97548	0.0772524	0.73634	-4.53209	FBgn0028369	kirre
2.09811	-1.12429	1.97445	0.077384	0.736617	-4.2574	FBgn0025709	CG8083
1.49579	1.23602	1.97399	0.0774417	0.736617	-4.72087	FBgn0026061	Mipp1
-1.58727	-2.39091	-1.97152	0.077758	0.738281	-4.11822	FBgn0039844	CG1607
0.409933	5.09988	1.97137	0.0777772	0.738281	-5.44763	FBgn0027101	Dyrk3
0.988682	1.23799	1.96682	0.0783622	0.743067	-4.7535	FBgn0085447	sif
-0.318077	6.38669	-1.96468	0.0786395	0.744929	-5.53698	FBgn0039743	CG7946
-0.357209	6.17554	-1.96306	0.0788493	0.746148	-5.53105	FBgn0029830	Grip
2.44614	-0.828727	1.95939	0.0793271	0.748195	-4.31354	FBgn0029827	CG6048
1.03726	2.79375	1.95915	0.079359	0.748195	-5.09149	FBgn0263316	Mrp4
-0.34199	4.8483	-1.95914	0.0793601	0.748195	-5.44289	FBgn0014366	noi
0.407357	7.67525	1.9589	0.0793909	0.748195	-5.56947	FBgn0004456	mew
2.77748	-3.68231	1.95757	0.0795655	0.749072	-4.0501	FBgn0037902	CG5281
-0.523451	6.24952	-1.95635	0.0797248	0.749805	-5.54371	FBgn0037810	sle
-1.6267	-1.74068	-1.95037	0.0805134	0.752138	-4.21872	FBgn0261612	CngA
-0.419979	5.79448	-1.95001	0.0805618	0.752138	-5.53132	FBgn0002567	ltd
-0.384382	5.11428	-1.94993	0.0805721	0.752138	-5.48202	FBgn0030403	CG1824
-0.544271	6.74578	-1.9497	0.0806021	0.752138	-5.57008	FBgn0035533	Cip4
-0.622651	1.78695	-1.94963	0.0806117	0.752138	-4.89949	FBgn0022382	Pka-R2
-2.4768	-3.09956	-1.94844	0.0807696	0.752138	-4.07833	FBgn0034151	CG15617
1.79582	1.44278	1.94811	0.0808136	0.752138	-4.79984	FBgn0051233	CG31233
3.05729	-3.20985	1.9475	0.0808948	0.752138	-4.07287	FBgn0032506	CG9395
-0.452129	6.63433	-1.94727	0.0809255	0.752138	-5.57118	FBgn0031037	CG14207
-1.58746	-0.650816	-1.94532	0.0811844	0.752138	-4.39263	FBgn0028496	CG30116
1.60617	0.725268	1.94526	0.0811931	0.752138	-4.66242	FBgn0030928	CG15044
-0.445215	5.80393	-1.94423	0.08133	0.752138	-5.54057	FBgn0039748	CG15529
2.06043	-1.12293	1.94417	0.0813383	0.752138	-4.30988	FBgn0038645	CG7714
-0.364712	5.70245	-1.94411	0.0813467	0.752138	-5.53497	FBgn0036775	CG5147
-0.624181	2.84481	-1.94389	0.0813754	0.752138	-5.13603	FBgn0035627	Sse
-0.519751	3.77878	-1.94283	0.0815177	0.752138	-5.32174	FBgn0027596	CG10249
0.489351	3.19113	1.94252	0.0815587	0.752138	-5.21232	FBgn0035953	CG5087
0.289921	7.66665	1.94251	0.0815613	0.752138	-5.5949	FBgn0010415	Sdc
-0.330018	5.77165	-1.94054	0.0818255	0.752138	-5.54493	FBgn0039776	PH4alphaEFB
-0.347869	4.32874	-1.93998	0.0818999	0.752138	-5.4112	FBgn0038330	CG14868
2.36049	-2.6918	1.93943	0.0819738	0.752138	-4.11988	FBgn0265272	CG30060
1.9527	-2.69919	1.93933	0.0819874	0.752138	-4.12634	FBgn0264817	pre-lola-G
0.416965	3.45969	1.93757	0.0822248	0.752138	-5.27344	FBgn0035111	CG16940
1.53602	0.0927294	1.93728	0.0822649	0.752138	-4.54494	FBgn0031631	CG3225
-0.424159	5.4489	-1.93619	0.0824122	0.752138	-5.52968	FBgn0030241	feo
-0.349644	6.30379	-1.93415	0.0826879	0.752138	-5.58075	FBgn0030177	CG2972
-0.675207	3.14489	-1.93357	0.0827674	0.752138	-5.21276	FBgn0263241	Mocs1
-0.316724	6.11462	-1.93214	0.0829613	0.752138	-5.576	FBgn0033379	Mys45A
3.1949	-3.10454	1.93134	0.0830711	0.752138	-4.09698	FBgn0026439	Eaat1
1.6717	-0.19982	1.92926	0.0833552	0.752138	-4.49401	FBgn0259678	sqa
-0.465065	3.44358	-1.92904	0.0833852	0.752138	-5.28293	FBgn0000286	Cf2
-0.321796	6.06105	-1.92876	0.0834237	0.752138	-5.57855	FBgn0266581	pit
-0.337417	8.24886	-1.9287	0.0834309	0.752138	-5.61268	FBgn0022343	CG3760
0.410634	5.66144	1.92837	0.0834774	0.752138	-5.55658	FBgn0016756	Ubp64E
0.379352	10.2989	1.92783	0.0835507	0.752138	-5.56718	FBgn0066084	RpL41
-0.571828	3.34919	-1.92634	0.0837551	0.752138	-5.26624	FBgn0036365	CG10732
0.349881	4.66806	1.92621	0.0837727	0.752138	-5.47422	FBgn0029588	CG14798
0.944461	0.572746	1.92565	0.0838505	0.752138	-4.67575	FBgn0259175	ome
1.00684	0.255036	1.92345	0.0841537	0.752138	-4.6123	FBgn0043362	bchs
-0.396853	5.73325	-1.92277	0.0842471	0.752138	-5.56941	FBgn0051390	MED7
-0.590846	5.10126	-1.92233	0.0843084	0.752138	-5.52112	FBgn0052368	CG32368
-1.04586	-0.500235	-1.92201	0.0843519	0.752138	-4.46557	FBgn0262476	CG43066
0.525248	5.69522	1.92185	0.0843747	0.752138	-5.56804	FBgn0052296	Mrtf
-0.29259	6.8785	-1.92076	0.0845259	0.752138	-5.61825	FBgn0036516	CG7656
0.493022	3.81642	1.9207	0.084534	0.752138	-5.36204	FBgn0010355	Taf1
-0.372066	4.18801	-1.92058	0.0845499	0.752138	-5.42127	FBgn0001122	Galphao
3.04267	-0.388396	1.91784	0.0849311	0.752138	-4.41372	FBgn0038700	CG3734
0.443324	3.45291	1.91775	0.0849428	0.752138	-5.30203	FBgn0051072	Lerp
2.77186	-2.19797	1.91743	0.0849883	0.752138	-4.19226	FBgn0037845	CG14694
-0.348358	5.04858	-1.91713	0.0850302	0.752138	-5.52659	FBgn0037688	CG9356
0.454372	3.65078	1.91637	0.0851359	0.752138	-5.34009	FBgn0053144	CG33144
0.427178	4.51781	1.9157	0.0852294	0.752138	-5.47213	FBgn0011836	Taf2
0.617247	5.26055	1.91558	0.0852467	0.752138	-5.54546	FBgn0004228	mex1
1.05576	-0.544664	1.91555	0.085251	0.752138	-4.46718	FBgn0037684	CG8129
0.747113	2.34687	1.91503	0.0853229	0.752138	-5.06946	FBgn0028500	Rich
0.785269	5.4223	1.91349	0.0855383	0.752138	-5.55964	FBgn0264750	CG44008
0.418804	3.33103	1.9132	0.0855793	0.752138	-5.28588	FBgn0050295	Ipk1
-2.38052	-2.86159	-1.91199	0.0857492	0.752138	-4.14197	FBgn0036014	CG3222
-0.387716	4.66241	-1.91147	0.0858222	0.752138	-5.49528	FBgn0039867	CstF-50
-0.363964	8.17998	-1.91082	0.0859131	0.752138	-5.64081	FBgn0260635	Diap1
0.341358	6.26377	1.9106	0.0859446	0.752138	-5.61536	FBgn0035101	p130CAS
2.25703	-2.90501	1.90957	0.0860891	0.752138	-4.14164	FBgn0261705	CG42741
1.55719	-1.69803	1.90947	0.0861039	0.752138	-4.28063	FBgn0034860	CG9812
-0.705584	5.63186	-1.90918	0.0861448	0.752138	-5.5817	FBgn0004108	Nrt
-0.550961	5.70625	-1.90913	0.0861522	0.752138	-5.58775	FBgn0003520	stau
0.419756	6.40275	1.9088	0.0861983	0.752138	-5.62311	FBgn0037057	CG10512
1.99203	0.0591908	1.90853	0.0862369	0.752138	-4.55019	FBgn0034394	CG15096
0.42838	8.97876	1.90821	0.0862811	0.752138	-5.62944	FBgn0016694	Pdp1
-2.26025	-3.70185	-1.90751	0.0863812	0.752138	-4.10591	FBgn0261262	CG42613
-1.48414	-0.771837	-1.90729	0.086411	0.752138	-4.4244	FBgn0039972	CG17018
-0.451021	3.16199	-1.90687	0.0864715	0.752138	-5.2608	FBgn0031183	CG14621
0.609921	1.9963	1.9064	0.0865371	0.752138	-5.00948	FBgn0034859	CG3520
0.824491	1.27248	1.906	0.0865948	0.752138	-4.8551	FBgn0002673	twe
-0.333215	9.25182	-1.90599	0.0865964	0.752138	-5.6264	FBgn0034670	CG13488
0.54868	2.17198	1.90455	0.0867998	0.752163	-5.05075	FBgn0034629	Acox57D-d
0.395023	6.10931	1.90441	0.0868195	0.752163	-5.6177	FBgn0010352	Nc73EF
-0.530873	3.40895	-1.90372	0.0869188	0.752163	-5.31298	FBgn0033750	CG13151
-0.34209	4.78196	-1.90271	0.0870618	0.752163	-5.52207	FBgn0031609	CG15443
-0.323078	5.82739	-1.90243	0.0871013	0.752163	-5.6063	FBgn0003257	r-l
-0.315368	5.90571	-1.9021	0.0871485	0.752163	-5.61125	FBgn0035059	CG3894
0.355268	6.3226	1.90194	0.0871717	0.752163	-5.63081	FBgn0011648	Mad
-0.315435	5.62496	-1.9007	0.0873492	0.752283	-5.59656	FBgn0037901	CG6744
1.73806	-2.85408	1.89946	0.0875268	0.753107	-4.16776	FBgn0267253	CG32700
0.370634	10.6646	1.89747	0.0878117	0.754853	-5.60392	FBgn0261608	RpL37A
-2.31954	-1.87848	-1.89629	0.0879815	0.755026	-4.26115	FBgn0030836	CG8664
2.64181	-2.46687	1.89619	0.0879961	0.755026	-4.19291	FBgn0026721	fat-spondin
1.18926	-0.0446448	1.89493	0.088177	0.755239	-4.58963	FBgn0029667	Gas8
1.4942	-1.6607	1.89487	0.0881851	0.755239	-4.30696	FBgn0050172	CG30172
-1.21839	1.06188	-1.89237	0.0885472	0.755923	-4.81639	FBgn0026592	Fie
-0.381314	3.89448	-1.89195	0.0886075	0.755923	-5.41938	FBgn0000588	esc
2.26023	-3.26289	1.89137	0.0886919	0.755923	-4.14029	FBgn0036029	CG16719
1.07077	0.191617	1.89126	0.0887083	0.755923	-4.64595	FBgn0040322	GNBP2
0.524403	2.55719	1.89123	0.0887123	0.755923	-5.15428	FBgn0034032	CG8195
-0.335412	6.11484	-1.89091	0.088758	0.755923	-5.63873	FBgn0019960	CG6455
0.515597	2.69303	1.888	0.089182	0.75883	-5.1895	FBgn0037635	CG9837
-0.312114	7.75645	-1.88635	0.0894217	0.759614	-5.68063	FBgn0024558	Dph5
0.676596	1.53156	1.88526	0.0895816	0.759614	-4.94204	FBgn0003507	srp
0.50834	6.6551	1.88511	0.0896043	0.759614	-5.66665	FBgn0004652	fru
0.33886	4.86626	1.88433	0.0897176	0.759873	-5.55891	FBgn0035333	CG1317
-0.86176	1.34496	-1.88243	0.0899965	0.760174	-4.90348	FBgn0035260	CG7991
-2.44797	-3.60007	-1.88234	0.0900096	0.760174	-4.13991	FBgn0037078	CG12971
0.350184	4.62432	1.88184	0.0900837	0.760174	-5.53664	FBgn0030501	BthD
0.661875	1.96118	1.88011	0.090338	0.760949	-5.04026	FBgn0029175	Ext2
-0.38762	4.83891	-1.87998	0.0903581	0.760949	-5.56225	FBgn0034265	Snx16
1.35127	0.812822	1.87905	0.0904945	0.760949	-4.77997	FBgn0031929	CG18585
0.988345	0.293378	1.87746	0.09073	0.760949	-4.68921	FBgn0034321	CG14502
-0.321422	7.22908	-1.87719	0.0907703	0.760949	-5.69047	FBgn0033317	CG8635
1.55038	-1.61349	1.87706	0.0907896	0.760949	-4.33813	FBgn0030807	CG13000
-4.19384	-1.59321	-1.8768	0.0908271	0.760949	-4.25733	FBgn0035781	CG8560
1.58439	1.03882	1.87674	0.0908373	0.760949	-4.81956	FBgn0263234	Phae1
-0.331098	5.29379	-1.87475	0.0911319	0.761359	-5.61179	FBgn0035707	CG8368
-1.24145	-0.824024	-1.87473	0.0911346	0.761359	-4.46925	FBgn0064227	Rdh
2.23369	-2.1615	1.87387	0.0912633	0.761742	-4.25843	FBgn0086711	mol
0.942428	-0.343347	1.87001	0.0918389	0.765158	-4.57186	FBgn0000658	fj
0.351721	8.34699	1.8676	0.0922011	0.767046	-5.70424	FBgn0029507	Tsp42Ed
-0.316557	5.87786	-1.86739	0.0922324	0.767046	-5.66219	FBgn0032812	Hakai
3.18254	-3.52181	1.86377	0.092779	0.768327	-4.16968	FBgn0031055	et
0.473477	2.61558	1.8624	0.0929859	0.768327	-5.21126	FBgn0034657	LBR
0.492692	4.22456	1.86109	0.0931843	0.768327	-5.51517	FBgn0259244	CG42342
-0.330189	4.66947	-1.86095	0.0932059	0.768327	-5.57305	FBgn0037467	CG1104
0.810942	1.6758	1.86048	0.0932767	0.768327	-5.00624	FBgn0031738	CG9171
1.65866	-1.14498	1.8603	0.0933042	0.768327	-4.42972	FBgn0032857	CG10947
-0.340998	6.46185	-1.85947	0.0934307	0.768327	-5.69973	FBgn0051184	LSm3
0.449081	6.18882	1.85945	0.0934331	0.768327	-5.68909	FBgn0263395	hppy
1.07261	0.599685	1.85923	0.093467	0.768327	-4.77384	FBgn0031461	daw
2.30046	-2.72678	1.85886	0.0935232	0.768327	-4.2209	FBgn0034532	CG13436
-1.07066	0.371047	-1.85852	0.0935747	0.768327	-4.73018	FBgn0026562	BM-40-SPARC
2.81125	-1.80218	1.85824	0.0936175	0.768327	-4.30475	FBgn0004428	LysE
0.523137	2.31012	1.85805	0.0936467	0.768327	-5.15051	FBgn0034976	CG4049
2.28839	-1.42815	1.85739	0.0937473	0.768327	-4.37644	FBgn0011695	PebIII
1.16646	-1.10337	1.857	0.0938064	0.768327	-4.44869	FBgn0035815	Snmp2
0.326029	7.5375	1.85584	0.0939841	0.769098	-5.72587	FBgn0033683	CG18343
-0.543216	2.23716	-1.85119	0.0946984	0.774254	-5.14403	FBgn0039861	pasha
0.63087	2.1208	1.84946	0.0949647	0.774519	-5.12038	FBgn0028504	CG12182
-0.349479	6.7143	-1.84783	0.095218	0.775453	-5.72465	FBgn0039094	CG10184
0.67014	2.80718	1.84722	0.0953128	0.775453	-5.27306	FBgn0032715	CG17597
-0.287767	6.71309	-1.84664	0.0954026	0.775453	-5.7266	FBgn0037439	CG10286
-1.15648	-0.946734	-1.84634	0.0954491	0.775453	-4.49016	FBgn0036116	CG7888
-0.386362	5.75534	-1.84401	0.0958112	0.775453	-5.68992	FBgn0260857	Bet1
-1.09058	-0.945158	-1.84391	0.0958258	0.775453	-4.49432	FBgn0029907	Atx-1
1.22103	0.895509	1.84231	0.0960758	0.775453	-4.85833	FBgn0030261	CG15203
-0.375676	4.93061	-1.84217	0.0960987	0.775453	-5.62838	FBgn0031998	SLC5A11
-1.72761	-0.0355919	-1.84166	0.0961773	0.775453	-4.64315	FBgn0031945	CG7191
-0.619451	4.47945	-1.84158	0.0961899	0.775453	-5.57661	FBgn0004635	rho
-0.447524	5.39164	-1.84148	0.0962063	0.775453	-5.66857	FBgn0027841	CstF-64
1.43232	-1.2801	1.84049	0.0963608	0.775453	-4.43748	FBgn0037280	CG1126
-0.360306	6.23508	-1.84048	0.0963625	0.775453	-5.71977	FBgn0038981	CG5346
-0.459616	2.69845	-1.83776	0.0967895	0.777812	-5.26664	FBgn0052537	CG32537
-0.367488	4.25869	-1.83753	0.0968248	0.777812	-5.55631	FBgn0087021	Spc25
0.986612	-0.29809	1.83676	0.0969457	0.778031	-4.6284	FBgn0033479	CG2292
-0.501399	2.50828	-1.83628	0.0970213	0.778031	-5.2268	FBgn0083068	CG33947
-0.323125	4.55925	-1.83498	0.0972273	0.779004	-5.59907	FBgn0030673	CG15601
-0.274304	7.45547	-1.83041	0.0979506	0.782859	-5.76346	FBgn0000053	ade3
-0.660162	6.2252	-1.82952	0.0980925	0.782859	-5.73399	FBgn0001258	ImpL3
-0.542636	4.82309	-1.82778	0.0983702	0.782859	-5.6374	FBgn0265052	St3
1.06032	3.04616	1.82747	0.0984192	0.782859	-5.33989	FBgn0036367	CG10116
1.00328	0.142372	1.8272	0.0984619	0.782859	-4.72928	FBgn0039755	CG15531
1.03784	0.56229	1.82709	0.0984805	0.782859	-4.81586	FBgn0250910	Octbeta3R
1.5882	-1.93699	1.82677	0.098532	0.782859	-4.36198	FBgn0029922	CG14431
0.849208	1.82957	1.82671	0.0985403	0.782859	-5.08842	FBgn0036999	isoQC
0.572833	1.42822	1.82654	0.0985686	0.782859	-5.00813	FBgn0262987	CG43295
0.325187	7.49677	1.82617	0.098627	0.782859	-5.76999	FBgn0262816	CG43187
-1.18988	-1.38549	-1.82606	0.0986446	0.782859	-4.44642	FBgn0029765	CG16756
0.350613	5.91939	1.82467	0.0988683	0.783957	-5.72838	FBgn0033205	CG2064
0.292974	6.81935	1.82411	0.0989577	0.783991	-5.76287	FBgn0010100	Acon
-1.17693	-1.19672	-1.82331	0.0990856	0.78415	-4.47924	FBgn0024293	Spn43Ab
1.56914	-1.40908	1.82292	0.0991484	0.78415	-4.43881	FBgn0052686	CG32686
0.453414	3.18847	1.82102	0.099455	0.785225	-5.3947	FBgn0032172	CG5850
-0.49976	2.99307	-1.81993	0.099631	0.785644	-5.35585	FBgn0002522	lab
-0.314329	4.43349	-1.81878	0.0998161	0.785644	-5.60794	FBgn0037884	Arfip
-0.351007	4.19408	-1.81865	0.099837	0.785644	-5.57554	FBgn0038167	lkb1
-0.281335	6.24551	-1.81814	0.0999195	0.785644	-5.75381	FBgn0024807	DIP1
-0.533293	4.11889	-1.81805	0.0999351	0.785644	-5.56367	FBgn0038878	CG3301
0.514039	2.67163	1.81667	0.100158	0.78672	-5.29059	FBgn0030240	CG2202
-0.335871	6.67075	-1.8155	0.100348	0.787545	-5.7718	FBgn0035205	CG2469
1.06904	-0.642869	1.81428	0.100547	0.787989	-4.59219	FBgn0032798	CG10132
-0.337063	7.89277	-1.8141	0.100576	0.787989	-5.7888	FBgn0020503	CLIP-190
0.345371	4.26153	1.8129	0.100772	0.788363	-5.59392	FBgn0032956	Cul2
-0.638346	3.73184	-1.81223	0.100881	0.788363	-5.50815	FBgn0011822	pcl
0.418465	7.08709	1.81097	0.101088	0.788783	-5.78741	FBgn0004858	elB
0.3622	4.65102	1.80972	0.101292	0.788783	-5.64743	FBgn0003044	Pcl
0.353365	4.21437	1.80937	0.10135	0.788783	-5.59257	FBgn0085242	CG34213
0.263466	7.64922	1.80931	0.10136	0.788783	-5.79605	FBgn0030519	CG11151
0.4504	5.77009	1.80828	0.101529	0.788783	-5.744	FBgn0051324	CG31324
1.31853	0.933252	1.80824	0.101535	0.788783	-4.91079	FBgn0034588	CG9394
-0.313018	5.56247	-1.80692	0.101752	0.78886	-5.73322	FBgn0044324	Chro
-0.299701	8.53378	-1.80607	0.101892	0.78886	-5.79271	FBgn0014029	2020-09-02
0.344514	5.28043	1.80549	0.101988	0.78886	-5.71454	FBgn0023129	aay
0.289803	7.2348	1.80516	0.102042	0.78886	-5.79847	FBgn0085265	CG34236
-0.482836	6.98681	-1.80456	0.102142	0.78886	-5.79496	FBgn0261563	wb
2.95806	-2.33926	1.80441	0.102167	0.78886	-4.31874	FBgn0039091	CG10182
-0.330796	4.91907	-1.80342	0.10233	0.78886	-5.68511	FBgn0034392	MFS15
0.437857	3.00158	1.80312	0.102379	0.78886	-5.3829	FBgn0259170	alpha-Man-I
-1.59989	-1.879	-1.80227	0.10252	0.78886	-4.39844	FBgn0013467	igl
0.46622	3.26048	1.80225	0.102524	0.78886	-5.43724	FBgn0037646	CAHbeta
0.807951	1.37372	1.80143	0.102659	0.78886	-5.02978	FBgn0263080	CG43348
-0.489509	4.62913	-1.80135	0.102674	0.78886	-5.65588	FBgn0030320	CG2247
0.355658	4.67965	1.80112	0.102711	0.78886	-5.66343	FBgn0037617	CG8145
1.8711	-0.743043	1.80074	0.102775	0.78886	-4.56821	FBgn0033216	CG1946
-0.361301	3.80013	-1.8004	0.102831	0.78886	-5.54097	FBgn0035155	RabX6
-0.291223	5.84158	-1.79866	0.103121	0.790423	-5.76286	FBgn0050349	CG30349
-0.990081	-0.185712	-1.79813	0.10321	0.790444	-4.70167	FBgn0035663	CG6462
-0.311698	7.40004	-1.79717	0.103369	0.790579	-5.81222	FBgn0034879	Rrp4
-0.931431	1.16795	-1.79699	0.103399	0.790579	-4.98948	FBgn0041605	cpx
-0.295097	7.28635	-1.79643	0.103492	0.790634	-5.81208	FBgn0015903	apt
-0.28132	6.68016	-1.79232	0.104183	0.793859	-5.80657	FBgn0031736	CG11030
0.516307	2.84176	1.79169	0.10429	0.793859	-5.36495	FBgn0029798	CG4078
-2.66522	-1.99504	-1.79135	0.104346	0.793859	-4.3702	FBgn0025382	Rab27
0.328151	5.28262	1.78981	0.104606	0.794522	-5.73806	FBgn0038302	CG4210
2.51148	1.3158	1.78981	0.104606	0.794522	-4.97645	FBgn0036767	CG16775
0.364938	7.13153	1.78801	0.104911	0.795992	-5.82222	FBgn0087013	Karybeta3
0.57833	4.76899	1.78729	0.105032	0.795992	-5.69135	FBgn0040765	luna
-1.0706	-0.732927	-1.78661	0.105149	0.796013	-4.61091	FBgn0036956	CG13813
-0.408944	6.09157	-1.78511	0.105403	0.79694	-5.79559	FBgn0035977	PGRP-LF
-0.320529	6.09704	-1.7844	0.105524	0.79694	-5.79718	FBgn0029857	wuho
-2.02922	-0.966673	-1.78396	0.105599	0.79694	-4.54784	FBgn0030090	fend
-0.352064	4.59885	-1.78385	0.105618	0.79694	-5.67932	FBgn0031842	Tango1
-0.281694	6.81018	-1.7798	0.106309	0.800625	-5.82819	FBgn0004856	Bx42
1.75149	-2.9883	1.77911	0.106428	0.800625	-4.30539	FBgn0038348	AOX2
2.26673	-3.29086	1.77898	0.106451	0.800625	-4.2734	FBgn0032850	Kua
0.313437	10.042	1.77896	0.106454	0.800625	-5.79719	FBgn0039300	RpS27
0.880513	1.53304	1.77719	0.106757	0.801427	-5.095	FBgn0029835	CG5921
1.50182	-1.0854	1.77631	0.106909	0.801427	-4.5538	FBgn0003499	sr
-0.400604	5.37344	-1.77493	0.107148	0.802562	-5.76629	FBgn0029980	CG10778
0.549208	2.35131	1.77337	0.107417	0.803378	-5.28332	FBgn0051118	RabX4
-0.381814	5.55599	-1.77298	0.107484	0.803378	-5.78248	FBgn0046685	Wsck
-0.276859	5.54252	-1.77278	0.107519	0.803378	-5.78233	FBgn0052344	CG32344
-0.277189	7.07212	-1.77132	0.107773	0.804029	-5.84593	FBgn0017457	U2af38
-0.497876	4.94527	-1.76967	0.10806	0.804029	-5.73628	FBgn0002719	Men
2.42827	-2.04098	1.76789	0.10837	0.804029	-4.40177	FBgn0038262	CG14857
0.485105	4.17386	1.76782	0.108381	0.804029	-5.646	FBgn0261801	CG42747
0.730355	2.80684	1.76758	0.108423	0.804029	-5.38834	FBgn0035557	CG11353
1.94022	-1.41176	1.76608	0.108686	0.804029	-4.50477	FBgn0264815	Pde1c
0.472518	5.31433	1.7659	0.108717	0.804029	-5.77466	FBgn0050463	CG30463
0.371578	3.57985	1.76555	0.108778	0.804029	-5.55294	FBgn0034491	Hsl
0.368765	4.55493	1.76463	0.108939	0.804029	-5.70268	FBgn0037465	CG1105
-0.292487	4.87685	-1.76443	0.108975	0.804029	-5.73857	FBgn0053158	CG33158
2.27856	-2.36785	1.76429	0.109	0.804029	-4.37562	FBgn0029834	CG5937
2.82504	-1.41462	1.76367	0.109108	0.804029	-4.48216	FBgn0034318	CG14500
2.19935	1.10119	1.76331	0.109171	0.804029	-4.95915	FBgn0034247	CG6484
-0.326998	4.61683	-1.76312	0.109205	0.804029	-5.71212	FBgn0035084	CG15861
-0.286747	5.4758	-1.76263	0.109292	0.804029	-5.79245	FBgn0036008	CG3408
0.34131	4.722	1.76218	0.109371	0.804029	-5.7255	FBgn0025741	PlexA
0.624055	3.46582	1.76213	0.109379	0.804029	-5.53349	FBgn0033460	Sec24AB
1.1101	-1.10664	1.76059	0.109651	0.804368	-4.58065	FBgn0035262	CG18171
0.90113	0.860509	1.76051	0.109664	0.804368	-4.97973	FBgn0050157	CG30157
2.05357	-2.49342	1.75955	0.109833	0.804368	-4.37376	FBgn0043043	Desat2
-0.322432	4.63816	-1.75715	0.110258	0.806162	-5.72328	FBgn0036973	Rbbp5
0.421804	3.75408	1.7551	0.110622	0.808001	-5.59884	FBgn0050476	ave
0.462831	5.29854	1.75475	0.110685	0.808001	-5.78987	FBgn0003093	Pkc98E
0.302141	8.26711	1.75415	0.110792	0.80814	-5.87402	FBgn0013272	Gp150
0.44284	4.43499	1.75351	0.110905	0.80829	-5.70329	FBgn0040252	Ugt86Dh
0.810228	1.03575	1.75239	0.111106	0.80829	-5.03061	FBgn0000826	png
0.53113	2.078	1.7516	0.111246	0.80829	-5.25554	FBgn0036147	Plod
0.542355	9.31198	1.7516	0.111247	0.80829	-5.8552	FBgn0035904	GstO3
0.279844	5.52677	1.7509	0.111371	0.80829	-5.81359	FBgn0050109	CG30109
0.540833	2.83254	1.75005	0.111524	0.80829	-5.42254	FBgn0051812	CG31812
0.457282	3.59772	1.74954	0.111615	0.80829	-5.57863	FBgn0050020	CG30020
0.380336	6.62444	1.74912	0.111691	0.80829	-5.86849	FBgn0002578	Kaz-m1
-1.05315	-1.07189	-1.74692	0.112086	0.809581	-4.6062	FBgn0036330	CG11263
-0.410972	7.40381	-1.74665	0.112134	0.809581	-5.8863	FBgn0029881	pigs
-1.38058	-1.98954	-1.7449	0.112449	0.810799	-4.46466	FBgn0036862	Gbs-76A
-1.42881	-1.43071	-1.74401	0.11261	0.810799	-4.54327	FBgn0038380	CG14877
0.484254	4.33556	1.74385	0.11264	0.810799	-5.70389	FBgn0031023	CG14200
0.706864	1.59237	1.74376	0.112656	0.810799	-5.16059	FBgn0027608	CG2082
0.983312	-0.422715	1.74328	0.112743	0.810799	-4.73356	FBgn0004512	Mdr49
0.292996	5.21364	1.74096	0.113163	0.812046	-5.80395	FBgn0032224	Sps2
-0.302679	7.26399	-1.74086	0.113181	0.812046	-5.89335	FBgn0037999	CG4860
2.12891	-2.59817	1.73956	0.113417	0.812469	-4.38503	FBgn0004516	Gad1
-0.33058	6.21783	-1.73821	0.113664	0.813604	-5.8701	FBgn0036889	CG14100
1.77043	0.367212	1.73716	0.113856	0.81433	-4.86776	FBgn0037387	CG1213
0.380092	4.36429	1.73668	0.113942	0.81433	-5.71922	FBgn0085271	CG34242
-0.289657	7.76501	-1.73393	0.114446	0.81446	-5.90698	FBgn0028685	Rpt4
2.05803	-2.41169	1.73374	0.11448	0.81446	-4.41131	FBgn0029722	CG7024
0.338285	6.07255	1.7332	0.11458	0.81446	-5.87083	FBgn0035321	CG1275
0.35782	4.06798	1.73266	0.11468	0.81446	-5.68312	FBgn0037883	CG14701
0.325603	7.62549	1.73257	0.114696	0.81446	-5.90856	FBgn0261800	LanB1
0.535675	5.28304	1.7324	0.114727	0.81446	-5.82063	FBgn0263081	CG43349
1.02063	-0.176573	1.7319	0.114818	0.81446	-4.7967	FBgn0037130	Syn1
-0.509056	2.44887	-1.73062	0.115055	0.81446	-5.36675	FBgn0034704	CG6758
-0.605692	1.29308	-1.73048	0.115081	0.81446	-5.11706	FBgn0015316	Try29F
0.418534	6.17407	1.73045	0.115085	0.81446	-5.87926	FBgn0003870	ttk
1.80212	-0.705443	1.7291	0.115336	0.81446	-4.67049	FBgn0261631	CG42714
0.568443	2.14618	1.72876	0.115397	0.81446	-5.303	FBgn0002592	E(spl)m2-BFM
-0.489485	2.5072	-1.72817	0.115506	0.81446	-5.38385	FBgn0036688	Fit2
1.90095	-0.440922	1.72817	0.115506	0.81446	-4.72466	FBgn0033789	CG13324
1.16073	-1.18812	1.7276	0.115612	0.81446	-4.61017	FBgn0032431	CG5435
-0.334557	6.86665	-1.72706	0.115712	0.81446	-5.90645	FBgn0262519	Mi-2
-0.297011	5.85282	-1.72704	0.115715	0.81446	-5.86835	FBgn0032290	CG6443
-0.32906	6.95394	-1.72628	0.115857	0.81446	-5.90938	FBgn0025716	Bap55
0.510119	5.9909	1.72622	0.115868	0.81446	-5.87607	FBgn0028397	Tob
-0.604336	1.63125	-1.726	0.115909	0.81446	-5.19517	FBgn0025632	CG4313
0.81232	0.681628	1.72338	0.116395	0.817138	-4.99703	FBgn0031542	CG15414
2.62056	-0.329464	1.723	0.116468	0.817138	-4.70452	FBgn0039310	CG11878
-0.392436	2.92087	-1.72186	0.116679	0.817394	-5.48431	FBgn0014342	mia
1.37563	-1.90069	1.72166	0.116716	0.817394	-4.50597	FBgn0036553	CG17027
1.86482	2.08351	1.72137	0.116771	0.817394	-5.25848	FBgn0043471	kappaTry
1.25822	-0.733941	1.72071	0.116894	0.817638	-4.69823	FBgn0033404	Or45a
1.97851	-2.94972	1.71991	0.117045	0.818067	-4.37538	FBgn0267104	CG45544
1.17536	3.4456	1.71885	0.117243	0.818213	-5.57672	FBgn0036766	CG5506
-0.40592	5.38767	-1.71777	0.117446	0.818816	-5.85064	FBgn0033113	Spn42Dc
0.391848	3.06269	1.71744	0.117508	0.818816	-5.52121	FBgn0033557	CG12325
-0.502511	3.69877	-1.71695	0.117599	0.81883	-5.64255	FBgn0052281	CG32281
1.26919	-0.921684	1.71502	0.117963	0.819351	-4.67143	FBgn0032733	CG15170
-0.870989	0.263738	-1.71437	0.118086	0.819351	-4.91559	FBgn0039900	Syt7
-0.334613	8.30068	-1.71372	0.118208	0.819351	-5.93191	FBgn0024288	Sox100B
-0.465408	2.28399	-1.71298	0.118348	0.819351	-5.35687	FBgn0020407	asun
-0.336168	6.37321	-1.71282	0.118378	0.819351	-5.91297	FBgn0030863	CG8188
-0.438442	4.2888	-1.71274	0.118392	0.819351	-5.7428	FBgn0031314	IntS14
-0.421999	3.39672	-1.7127	0.118401	0.819351	-5.59452	FBgn0266916	Cenp-C
1.19382	-1.34147	1.71257	0.118425	0.819351	-4.60329	FBgn0027348	bgm
1.22112	-1.34025	1.71171	0.118588	0.819351	-4.6065	FBgn0038366	CG4576
-1.37298	-1.50229	-1.71127	0.118672	0.819351	-4.57734	FBgn0005775	Con
1.81784	2.00065	1.71114	0.118697	0.819351	-5.2534	FBgn0002570	Mal-A1
1.42866	-1.43054	1.71089	0.118743	0.819351	-4.59047	FBgn0263988	Dic61B
-0.299461	5.9556	-1.70993	0.118926	0.819998	-5.89885	FBgn0020392	Nmt
-0.412401	3.33147	-1.70884	0.119132	0.820413	-5.58776	FBgn0003654	sw
0.345726	11.2226	1.70829	0.119237	0.820413	-5.86901	FBgn0032987	RpL21
-0.778585	0.869079	-1.70782	0.119327	0.820413	-5.05538	FBgn0040850	CG15210
2.18381	-2.90961	1.70774	0.119343	0.820413	-4.39103	FBgn0037448	CG15186
-1.99132	-3.27448	-1.70636	0.119606	0.821386	-4.3625	FBgn0266347	nAChRalpha4
-0.301548	6.56016	-1.70606	0.119663	0.821386	-5.92901	FBgn0038088	CG10126
-0.597318	1.49427	-1.70557	0.119756	0.821412	-5.19452	FBgn0086359	Invadolysin
-0.566957	1.55888	-1.70504	0.119859	0.821504	-5.21	FBgn0052625	CG32625
0.371459	4.30622	1.70423	0.120013	0.821827	-5.75834	FBgn0033554	Lsm10
-1.19015	-0.858108	-1.70386	0.120084	0.821827	-4.70007	FBgn0259878	Fs
1.20492	2.73508	1.70222	0.120398	0.822903	-5.4525	FBgn0051198	CG31198
0.352481	10.423	1.69899	0.121019	0.825355	-5.90368	FBgn0040007	RpL38
-0.2594	7.56288	-1.69839	0.121135	0.825355	-5.95773	FBgn0010774	Ref1
-1.28326	-0.324723	-1.69838	0.121138	0.825355	-4.80301	FBgn0033140	CG12836
-2.06151	-3.45949	-1.69724	0.121358	0.826243	-4.36172	FBgn0083973	CG34137
0.371849	5.67182	1.69524	0.121745	0.828261	-5.90328	FBgn0005427	ewg
-0.286862	8.52242	-1.69407	0.121972	0.828687	-5.95641	FBgn0050410	Rpi
-0.499733	4.39351	-1.69399	0.121988	0.828687	-5.78267	FBgn0037844	CG4570
0.839256	-0.127306	1.6928	0.122219	0.829328	-4.86549	FBgn0000045	Act79B
0.455757	3.98181	1.69244	0.122291	0.829328	-5.72615	FBgn0034493	CG8908
0.407142	7.38743	1.6911	0.122551	0.829328	-5.96645	FBgn0031016	kek5
2.07517	-2.78363	1.69099	0.122573	0.829328	-4.4259	FBgn0036416	CG7924
2.29618	-2.40022	1.69077	0.122616	0.829328	-4.4629	FBgn0052284	CG32284
0.290321	6.87463	1.69029	0.122709	0.829328	-5.95971	FBgn0033059	CG7845
-0.582298	3.93652	-1.69027	0.122713	0.829328	-5.72116	FBgn0263873	sick
-0.27796	5.875	-1.68927	0.122908	0.830038	-5.92409	FBgn0036298	nst
0.342642	10.7174	1.68806	0.123147	0.831037	-5.91164	FBgn0261599	RpS29
-0.613109	7.16664	-1.68669	0.123414	0.832229	-5.96936	FBgn0041087	wun2
1.20943	-1.09646	1.68586	0.123578	0.832556	-4.68055	FBgn0029657	CG12535
4.03322	-2.07212	1.68511	0.123725	0.832556	-4.4485	FBgn0036023	CG18179
0.320317	11.1675	1.68494	0.123758	0.832556	-5.90402	FBgn0002579	RpL36
0.348452	4.3596	1.68459	0.123828	0.832556	-5.79414	FBgn0035355	CG16985
0.665904	0.856961	1.68415	0.123915	0.832556	-5.09027	FBgn0086348	se
2.19733	-3.49097	1.68296	0.124149	0.833081	-4.37397	FBgn0023550	CG18031
-0.662617	0.814616	-1.68207	0.124325	0.833081	-5.08495	FBgn0051454	CG31454
-0.835969	3.02087	-1.68178	0.124383	0.833081	-5.55395	FBgn0033458	CG18446
0.427762	3.68359	1.68127	0.124483	0.833081	-5.69261	FBgn0039223	CG5805
-0.382603	5.0647	-1.68106	0.124526	0.833081	-5.87659	FBgn0031287	CG4291
0.46846	3.70399	1.68032	0.124672	0.833081	-5.69727	FBgn0030049	Trf4-1
-0.383383	3.95343	-1.67984	0.124767	0.833081	-5.74057	FBgn0050022	CG30022
2.19958	-2.49314	1.67969	0.124797	0.833081	-4.46739	FBgn0004581	bgcn
-0.5439	2.09855	-1.67942	0.12485	0.833081	-5.36221	FBgn0050156	CG30156
-0.295915	4.58183	-1.67917	0.124899	0.833081	-5.82932	FBgn0038672	CG6005
1.83195	-1.57675	1.67843	0.125046	0.833081	-4.60221	FBgn0039069	CG6763
0.588126	4.28149	1.67826	0.12508	0.833081	-5.78902	FBgn0000116	Argk
-0.305263	6.61679	-1.67559	0.125613	0.835493	-5.97427	FBgn0259214	PMCA
-0.349399	4.12279	-1.67468	0.125794	0.835493	-5.7744	FBgn0010441	pll
0.291027	6.08948	1.6739	0.12595	0.835493	-5.95712	FBgn0035926	CG5804
0.525645	1.57086	1.67379	0.125973	0.835493	-5.25707	FBgn0038221	CG3259
-1.03632	0.0972696	-1.67303	0.126125	0.835493	-4.93511	FBgn0036665	CG13024
0.483369	2.4369	1.67274	0.126182	0.835493	-5.44734	FBgn0036374	Spt20
1.09214	-0.0947603	1.67119	0.126494	0.835493	-4.89601	FBgn0000422	Ddc
-0.2814	5.32009	-1.67024	0.126684	0.835493	-5.91423	FBgn0032925	CG9246
1.80672	0.260629	1.66954	0.126826	0.835493	-4.94245	FBgn0011834	Ser6
0.846366	0.15264	1.66907	0.12692	0.835493	-4.95614	FBgn0031517	CG15406
-0.375134	3.81595	-1.6688	0.126975	0.835493	-5.73353	FBgn0027550	CG6495
-0.331844	6.59967	-1.66827	0.127081	0.835493	-5.98414	FBgn0029771	CG12730
0.271603	6.63718	1.66707	0.127322	0.835493	-5.98735	FBgn0034451	TBCB
-0.381098	4.92944	-1.66588	0.127564	0.835493	-5.88532	FBgn0030851	CG8326
-0.262278	8.92712	-1.66581	0.127578	0.835493	-5.98799	FBgn0040364	CG11378
-0.415248	2.63662	-1.66563	0.127614	0.835493	-5.50234	FBgn0004611	Plc21C
-0.274964	6.66137	-1.66516	0.127709	0.835493	-5.99044	FBgn0033741	CG8545
0.239771	7.77026	1.66497	0.127747	0.835493	-6.00626	FBgn0026090	CG14812
-0.79792	0.826298	-1.66401	0.127943	0.835493	-5.1086	FBgn0034924	CG17658
0.413157	3.90971	1.66375	0.127997	0.835493	-5.75646	FBgn0028743	Dhit
-0.289736	6.88643	-1.66372	0.128002	0.835493	-5.9979	FBgn0020513	ade5
-0.245507	7.27493	-1.66318	0.128112	0.835493	-6.00531	FBgn0259139	glo
1.47765	-2.26707	1.66299	0.128151	0.835493	-4.52999	FBgn0260758	CG42556
0.426668	5.68811	1.66288	0.128173	0.835493	-5.95031	FBgn0032679	bsf
0.376773	10.1418	1.66277	0.128195	0.835493	-5.96266	FBgn0023170	RpL39
2.23823	-1.67689	1.66133	0.128488	0.835493	-4.59797	FBgn0038482	CG4053
-0.318855	4.84234	-1.66006	0.128747	0.835493	-5.88534	FBgn0261067	LSm1
0.348059	5.06463	1.65917	0.128928	0.835493	-5.90811	FBgn0261985	Ptpmeg
-0.369636	3.72862	-1.65879	0.129005	0.835493	-5.73294	FBgn0034008	CG8152
-0.307714	6.41467	-1.65827	0.129112	0.835493	-5.99249	FBgn0034430	mip40
0.276582	5.82888	1.65712	0.129348	0.835493	-5.96736	FBgn0037239	CG11739
0.446693	7.69996	1.65696	0.129381	0.835493	-6.01699	FBgn0010909	msn
-0.26753	7.35211	-1.65669	0.129436	0.835493	-6.01538	FBgn0010288	Uch
0.306232	5.69326	1.65646	0.129483	0.835493	-5.96024	FBgn0038363	Acyp2
0.308188	5.93109	1.65633	0.129511	0.835493	-5.97398	FBgn0037215	CG12582
-0.338918	5.65088	-1.65611	0.129555	0.835493	-5.95763	FBgn0031322	CG5001
0.532057	6.44626	1.65599	0.12958	0.835493	-5.99631	FBgn0040609	CG3348
-0.356573	5.42719	-1.65599	0.12958	0.835493	-5.94235	FBgn0028380	fal
-1.32199	-1.748	-1.65543	0.129695	0.835493	-4.61421	FBgn0022359	Sodh-2
-0.479366	5.73298	-1.65491	0.1298	0.835493	-5.96386	FBgn0032223	GATAd
-0.23672	8.51816	-1.65357	0.130078	0.835493	-6.01431	FBgn0035370	Non2
-0.327526	3.81152	-1.6534	0.130112	0.835493	-5.75531	FBgn0012051	CalpA
-2.02415	-2.81114	-1.6533	0.130132	0.835493	-4.46698	FBgn0032013	Scgalpha
-0.438381	6.93078	-1.65289	0.130216	0.835493	-6.01383	FBgn0036761	MED19
-0.426856	4.33626	-1.65287	0.13022	0.835493	-5.83493	FBgn0000546	EcR
-0.519908	1.56078	-1.65277	0.130243	0.835493	-5.28396	FBgn0037974	CG12224
0.419937	4.42566	1.65269	0.130258	0.835493	-5.84709	FBgn0004852	Ac76E
-0.299365	7.29423	-1.65253	0.130292	0.835493	-6.02058	FBgn0259168	mnb
-0.28961	5.08844	-1.65242	0.130314	0.835493	-5.91995	FBgn0037073	CG7338
0.458207	4.9125	1.65186	0.13043	0.835493	-5.90301	FBgn0259228	C3G
-0.410972	3.15082	-1.65152	0.130499	0.835493	-5.63251	FBgn0036926	CG7646
-0.799654	0.206327	-1.65138	0.130529	0.835493	-4.99295	FBgn0035767	CG8596
-1.55323	-2.07996	-1.64979	0.130858	0.836915	-4.56924	FBgn0033855	link
-0.346595	3.26113	-1.64923	0.130974	0.836915	-5.65888	FBgn0036843	CG6812
0.548265	2.26034	1.64779	0.131272	0.836915	-5.44231	FBgn0051643	CG31643
-0.37404	4.80261	-1.647	0.131436	0.836915	-5.8991	FBgn0035169	CG13890
0.502838	3.70123	1.64681	0.131477	0.836915	-5.7438	FBgn0051098	CG31098
-0.919317	3.39957	-1.64642	0.131557	0.836915	-5.67454	FBgn0262366	CG43064
0.356756	5.49136	1.64641	0.13156	0.836915	-5.96086	FBgn0033381	GstE13
-1.49823	-1.24797	-1.64605	0.131635	0.836915	-4.69672	FBgn0260932	cuff
-0.372382	5.24	-1.64559	0.13173	0.836915	-5.94235	FBgn0036514	CG12301
-0.302516	6.30292	-1.64536	0.131777	0.836915	-6.00675	FBgn0036500	CG7275
0.302568	9.39267	1.64523	0.131805	0.836915	-6.00609	FBgn0016726	RpL29
1.62384	-1.1547	1.64505	0.131843	0.836915	-4.71324	FBgn0033873	CG6337
-0.314091	3.70017	-1.64457	0.131942	0.83697	-5.74887	FBgn0026702	l(1)G0045
2.47296	-1.83128	1.64375	0.132114	0.837354	-4.5972	FBgn0039611	CG14528
-0.486142	3.06693	-1.64308	0.132254	0.837354	-5.62541	FBgn0259113	DNApol-alpha180
2.32163	-3.05501	1.64297	0.132276	0.837354	-4.44918	FBgn0015572	alpha-Est4
-0.295651	5.1315	-1.64104	0.132681	0.838069	-5.9398	FBgn0261268	Cul3
0.298629	5.50805	1.64035	0.132825	0.838069	-5.97083	FBgn0011747	Ank
-0.760509	1.59925	-1.63986	0.132928	0.838069	-5.30707	FBgn0032700	CG10338
-0.324444	5.29991	-1.63979	0.132943	0.838069	-5.95548	FBgn0039580	Gfat2
-1.88865	-2.9285	-1.63959	0.132985	0.838069	-4.47279	FBgn0029864	CG15894
-0.270498	6.97921	-1.63835	0.133245	0.838069	-6.03561	FBgn0019982	Gs1l
0.940305	-0.824204	1.63806	0.133307	0.838069	-4.79745	FBgn0085385	CG34356
-0.639482	4.49624	-1.63747	0.133432	0.838069	-5.87356	FBgn0030189	CG2909
-0.353459	5.88768	-1.63681	0.133571	0.838069	-5.99903	FBgn0032298	CG6724
-0.400018	3.78342	-1.63626	0.133687	0.838069	-5.77378	FBgn0036959	CG6951
1.00001	-0.77798	1.63598	0.133746	0.838069	-4.80712	FBgn0029603	CG14053
0.400047	3.02735	1.63478	0.133999	0.838069	-5.6302	FBgn0028956	mthl3
-0.307768	8.27805	-1.63457	0.134043	0.838069	-6.04515	FBgn0034736	CG6018
2.6227	-3.37311	1.63327	0.134318	0.838069	-4.43787	FBgn0051116	ClC-a
0.507899	1.81983	1.63323	0.134327	0.838069	-5.36663	FBgn0037846	CG6574
-0.362859	3.61695	-1.63309	0.134357	0.838069	-5.7495	FBgn0063649	CG6006
-0.420676	3.62036	-1.63307	0.134362	0.838069	-5.74909	FBgn0039273	CG9996
-0.940589	-0.715969	-1.63139	0.134717	0.838069	-4.82575	FBgn0036727	CG7589
0.930333	-0.799341	1.63138	0.13472	0.838069	-4.81157	FBgn0033979	Cyp6a19
-0.26528	6.59471	-1.63107	0.134785	0.838069	-6.03676	FBgn0036668	CG9715
0.376556	3.53664	1.631	0.134801	0.838069	-5.73742	FBgn0040324	Ephrin
0.466196	8.41192	1.63057	0.134892	0.838069	-6.0486	FBgn0014388	sty
-0.372376	3.13703	-1.63038	0.134932	0.838069	-5.65992	FBgn0036777	CG7341
0.318993	8.81977	1.63019	0.134972	0.838069	-6.04082	FBgn0015521	RpS21
0.489169	4.27316	1.63009	0.134995	0.838069	-5.8582	FBgn0037327	PEK
0.715666	1.87918	1.62992	0.135031	0.838069	-5.38165	FBgn0033644	Tret1-2
2.10566	-2.45002	1.62859	0.135315	0.838594	-4.53931	FBgn0261675	Npc1b
-0.282752	6.25454	-1.62772	0.1355	0.838594	-6.02967	FBgn0027950	MBD-like
0.600541	3.2414	1.62745	0.135558	0.838594	-5.68136	FBgn0040361	CG14627
-0.269445	6.46631	-1.62734	0.135581	0.838594	-6.03803	FBgn0261617	nej
-0.311406	7.7151	-1.62709	0.135636	0.838594	-6.05951	FBgn0011481	Ssdp
-0.298541	7.57978	-1.62696	0.135663	0.838594	-6.05922	FBgn0037360	CG2182
-0.26823	4.94308	-1.62634	0.135795	0.838753	-5.94307	FBgn0261109	mrn
-0.272287	5.98596	-1.62598	0.135871	0.838753	-6.01986	FBgn0038868	CG5862
0.681128	2.67748	1.62407	0.136281	0.840717	-5.56523	FBgn0015039	Cyp9b2
-2.11207	-2.92418	-1.62328	0.136451	0.84084	-4.49471	FBgn0264472	CG43880
0.271775	6.82725	1.62256	0.136606	0.84084	-6.05474	FBgn0037989	ATP8B
0.769673	0.289094	1.62213	0.136699	0.84084	-5.05063	FBgn0032774	CG17549
1.36324	-2.37514	1.62133	0.136871	0.84084	-4.56913	FBgn0033756	CG17760
0.247849	7.84069	1.62133	0.136872	0.84084	-6.06773	FBgn0005278	Sam-S
0.332756	5.5914	1.62072	0.137003	0.84084	-6.00381	FBgn0038755	Hs6st
-1.72155	0.170617	-1.62011	0.137134	0.84084	-4.98344	FBgn0032897	CG9336
0.304225	5.0012	1.6197	0.137223	0.84084	-5.95785	FBgn0261802	CG42748
-0.398	3.74503	-1.61936	0.137296	0.84084	-5.7908	FBgn0051111	CG31111
-0.324578	4.10362	-1.61897	0.13738	0.84084	-5.85061	FBgn0032250	holn1
-0.296187	5.90828	-1.61872	0.137435	0.84084	-6.02575	FBgn0015527	pen
0.294727	6.59424	1.61847	0.137489	0.84084	-6.05466	FBgn0038220	CG12207
-0.977956	-0.402832	-1.6176	0.137677	0.841428	-4.90609	FBgn0031908	CG5177
-0.760381	1.41098	-1.6162	0.137981	0.842728	-5.2974	FBgn0261089	Sytalpha
-0.419393	5.47207	-1.6152	0.138198	0.842875	-6.00263	FBgn0035617	l(3)psg2
-0.260022	6.96477	-1.61364	0.138539	0.842875	-6.07002	FBgn0036341	Syx13
-0.247194	6.31657	-1.6134	0.13859	0.842875	-6.05235	FBgn0261119	Prp19
-0.454505	2.52284	-1.61329	0.138614	0.842875	-5.55003	FBgn0033749	achi
1.39117	-1.94978	1.61211	0.138871	0.842875	-4.63811	FBgn0024943	PIP82
0.355798	5.72895	1.61136	0.139035	0.842875	-6.02562	FBgn0020370	TppII
1.31523	0.0643546	1.61088	0.13914	0.842875	-5.00501	FBgn0037934	CG6830
0.577107	5.52906	1.6106	0.139202	0.842875	-6.0123	FBgn0040256	Ugt86Dd
0.684665	1.02674	1.60986	0.139363	0.842875	-5.22809	FBgn0033093	CG3270
-2.18993	-2.68866	-1.6095	0.139442	0.842875	-4.52988	FBgn0038799	CG4288
0.660891	1.76749	1.60891	0.139573	0.842875	-5.38681	FBgn0029838	CG4666
-0.270929	6.1009	-1.60844	0.139676	0.842875	-6.05001	FBgn0010750	atms
0.394584	4.14267	1.60841	0.139682	0.842875	-5.87037	FBgn0035989	CG3967
-0.45663	2.76976	-1.60832	0.139702	0.842875	-5.61057	FBgn0034403	CG18190
0.329965	5.77483	1.60827	0.139712	0.842875	-6.03269	FBgn0011591	fng
-0.45225	3.60649	-1.6081	0.139751	0.842875	-5.78117	FBgn0020251	sfl
1.27221	0.409199	1.60799	0.139774	0.842875	-5.07443	FBgn0052687	CG32687
-0.326373	6.07064	-1.6077	0.139838	0.842875	-6.0494	FBgn0038206	twf
-0.324993	4.96883	-1.60407	0.140638	0.845671	-5.97643	FBgn0017551	Rca1
0.29323	8.12844	1.60382	0.140694	0.845671	-6.09043	FBgn0267002	unc-104
-1.49587	-1.9934	-1.60365	0.140729	0.845671	-4.64051	FBgn0034687	CG11475
-0.375872	4.75005	-1.60351	0.140761	0.845671	-5.95434	FBgn0036922	CG14182
0.361827	3.64402	1.6019	0.141118	0.847049	-5.7975	FBgn0032339	CG4705
0.495085	3.80304	1.6013	0.141249	0.847049	-5.82447	FBgn0028424	JhI-26
-0.414278	6.31041	-1.60123	0.141267	0.847049	-6.06842	FBgn0027499	wde
0.85039	0.124573	1.60033	0.141465	0.847549	-5.04439	FBgn0032377	CG14937
0.30113	6.28438	1.60002	0.141535	0.847549	-6.06973	FBgn0024315	Picot
0.290073	4.92932	1.59952	0.141645	0.847659	-5.97928	FBgn0031818	CG9536
-0.284126	9.77444	-1.59756	0.142081	0.848491	-6.06347	FBgn0001197	His2Av
2.21697	0.555408	1.59727	0.142147	0.848491	-5.06302	FBgn0015575	alpha-Est7
0.779296	-0.241388	1.59706	0.142194	0.848491	-4.97075	FBgn0085427	CG34398
0.589864	2.65886	1.59683	0.142245	0.848491	-5.60001	FBgn0033903	CG8323
0.452237	3.02446	1.59373	0.142938	0.85207	-5.68608	FBgn0264494	CG17646
0.397102	7.33519	1.59146	0.143448	0.853172	-6.10641	FBgn0025864	Crag
-0.389506	6.88356	-1.59129	0.143484	0.853172	-6.09923	FBgn0264693	ens
0.296346	4.04469	1.59096	0.143561	0.853172	-5.88072	FBgn0002774	mle
0.276583	6.0178	1.59076	0.143605	0.853172	-6.07044	FBgn0015298	Srp19
-0.255401	7.33376	-1.59066	0.143627	0.853172	-6.10773	FBgn0028684	Rpt5
0.398986	4.29494	1.59043	0.143679	0.853172	-5.91705	FBgn0035060	Eps-15
0.388181	7.42151	1.58909	0.143981	0.853996	-6.11062	FBgn0036663	CG9674
-0.318217	5.30456	-1.58899	0.144004	0.853996	-6.02682	FBgn0052438	SMC5
-0.384012	3.36123	-1.58808	0.144208	0.854657	-5.76358	FBgn0037531	CG10445
-0.349334	3.33702	-1.58699	0.144455	0.85557	-5.76042	FBgn0039025	Usp12-46
0.676859	1.65981	1.58423	0.145081	0.858716	-5.39846	FBgn0033890	Ctf4
-2.23081	-2.62299	-1.58381	0.145176	0.858716	-4.56296	FBgn0262008	CG42826
-0.271505	5.31197	-1.58193	0.145604	0.858716	-6.03739	FBgn0036376	Liprin-beta
0.262391	6.03893	1.58096	0.145825	0.858716	-6.08512	FBgn0085638	CG41378
-0.284652	4.26687	-1.58068	0.145889	0.858716	-5.92757	FBgn0035497	CG14995
0.283724	4.88802	1.58012	0.146015	0.858716	-6.00192	FBgn0086384	Mer
1.37012	-2.079	1.58009	0.146023	0.858716	-4.65816	FBgn0050163	Cpr60D
-0.256867	5.56394	-1.5788	0.146318	0.858716	-6.06026	FBgn0037739	CG12948
-0.388415	3.01857	-1.57874	0.146331	0.858716	-5.70615	FBgn0033884	CG13344
-0.405788	2.64994	-1.57859	0.146366	0.858716	-5.62621	FBgn0037703	JHDM2
0.385652	4.02348	1.57813	0.14647	0.858716	-5.89424	FBgn0003598	Su(var)3-7
0.485467	2.79066	1.57718	0.146688	0.858716	-5.65809	FBgn0264672	Eogt
-0.374483	5.81369	-1.57699	0.146734	0.858716	-6.07807	FBgn0053514	CG33514
0.238931	6.10175	1.5768	0.146776	0.858716	-6.09391	FBgn0039427	CG5447
-0.914329	-0.957954	-1.57555	0.147063	0.858716	-4.85352	FBgn0050178	CG30178
-0.364702	4.47419	-1.57537	0.147104	0.858716	-5.96106	FBgn0013531	MED20
1.88386	-2.66402	1.57394	0.147434	0.858716	-4.57979	FBgn0263041	CG43336
-0.397862	2.5327	-1.57372	0.147484	0.858716	-5.60728	FBgn0000246	c(3)G
-0.257907	7.62645	-1.57306	0.147635	0.858716	-6.13447	FBgn0033062	Ars2
0.8155	0.930527	1.57229	0.147813	0.858716	-5.25562	FBgn0051901	Mur29B
-0.34692	3.07077	-1.57199	0.147883	0.858716	-5.72665	FBgn0262871	lute
1.7874	-1.45659	1.57088	0.148139	0.858716	-4.75534	FBgn0038083	CG5999
0.655823	2.67385	1.57081	0.148157	0.858716	-5.63705	FBgn0029824	CG3726
1.02467	-0.319742	1.57026	0.148284	0.858716	-4.98642	FBgn0034098	krimp
-0.385716	4.50344	-1.57008	0.148325	0.858716	-5.97178	FBgn0250850	rig
0.430437	2.54636	1.56981	0.148388	0.858716	-5.61473	FBgn0000376	crm
-0.252643	6.43428	-1.56977	0.148397	0.858716	-6.11692	FBgn0035878	CG7182
2.35021	-3.88087	1.56961	0.148434	0.858716	-4.49072	FBgn0037013	CG13250
-0.377004	4.75593	-1.56957	0.148444	0.858716	-6.00178	FBgn0033653	CG13192
0.246783	6.62372	1.56933	0.1485	0.858716	-6.12371	FBgn0032880	CG9318
0.322329	10.8547	1.56888	0.148603	0.858716	-6.07514	FBgn0010078	RpL23
2.37409	-2.18366	1.56866	0.148653	0.858716	-4.64214	FBgn0030159	CG9689
-0.316293	5.33137	-1.56847	0.148699	0.858716	-6.05714	FBgn0003346	RanGAP
0.557572	6.64946	1.56837	0.148721	0.858716	-6.12477	FBgn0032587	CG5953
0.304967	11.0225	1.56761	0.148897	0.859193	-6.07237	FBgn0035422	RpL28
0.671088	0.905037	1.56522	0.149455	0.86133	-5.26298	FBgn0029082	hbs
0.505579	4.54453	1.56421	0.14969	0.86156	-5.98407	FBgn0022702	Cht2
0.409695	4.09005	1.56394	0.149752	0.86156	-5.92403	FBgn0035760	CG8607
0.312313	4.67746	1.56345	0.149867	0.86156	-6.00239	FBgn0011771	Hem
1.4882	-0.997286	1.56344	0.149869	0.86156	-4.84764	FBgn0050047	CG30047
-0.414374	3.35784	-1.56259	0.150067	0.861706	-5.79771	FBgn0034585	Rbpn-5
-0.25783	6.98455	-1.56231	0.150133	0.861706	-6.14139	FBgn0033081	geminin
-0.49725	3.90721	-1.56189	0.150233	0.861706	-5.89627	FBgn0037443	Dmtn
0.75737	0.167209	1.5612	0.150394	0.861706	-5.10551	FBgn0032629	beat-IIIc
0.342916	8.55323	1.55982	0.150718	0.861706	-6.14422	FBgn0001229	Hsp67Bc
0.395371	7.26574	1.55978	0.150727	0.861706	-6.14921	FBgn0263995	cpo
-0.251898	7.43955	-1.5595	0.150792	0.861706	-6.15179	FBgn0037566	mRpL1
-0.312898	3.67485	-1.55894	0.150924	0.861706	-5.86289	FBgn0038763	CG4433
0.268819	6.78956	1.5586	0.151004	0.861706	-6.14248	FBgn0038038	CG5167
-0.272662	6.13527	-1.55856	0.151015	0.861706	-6.12053	FBgn0033463	CG1513
0.296666	6.88312	1.55854	0.151019	0.861706	-6.14451	FBgn0040360	CG14626
-0.245641	7.34344	-1.55725	0.151321	0.862897	-6.15383	FBgn0026533	Dek
0.292272	6.2727	1.55662	0.15147	0.863211	-6.1291	FBgn0040398	CG14629
-0.221759	8.6379	-1.55617	0.151577	0.863247	-6.14742	FBgn0011640	lark
0.541321	2.62667	1.5558	0.151664	0.863247	-5.65033	FBgn0024698	Cpsf160
-0.822854	-0.497422	-1.5551	0.151829	0.863651	-4.97141	FBgn0041004	CG17715
1.13227	-1.61235	1.55418	0.152048	0.863657	-4.76341	FBgn0029896	CG3168
1.01516	-1.19405	1.55327	0.152263	0.863657	-4.83759	FBgn0037485	CG14606
-0.390554	3.20998	-1.55275	0.152386	0.863657	-5.78142	FBgn0035838	ldbr
0.417892	7.84783	1.55268	0.152403	0.863657	-6.1623	FBgn0250789	alpha-Spec
0.368407	4.73166	1.55194	0.152577	0.863657	-6.02362	FBgn0000567	Eip74EF
-0.307011	4.49854	-1.55087	0.152832	0.863657	-5.99818	FBgn0002775	msl-3
0.237574	6.09658	1.55041	0.152942	0.863657	-6.12984	FBgn0040251	Ugt86Di
1.97358	0.107919	1.55032	0.152964	0.863657	-5.04914	FBgn0032839	CG10659
-0.307656	7.31232	-1.5496	0.153135	0.863657	-6.16383	FBgn0029512	Aos1
-0.348854	4.41403	-1.54939	0.153185	0.863657	-5.98935	FBgn0013718	nuf
2.39955	-2.2941	1.54905	0.153267	0.863657	-4.65048	FBgn0036264	CG11529
-0.36459	3.31854	-1.54869	0.153351	0.863657	-5.80898	FBgn0011672	Mvl
-0.289642	4.40055	-1.54826	0.153455	0.863657	-5.98955	FBgn0034694	CG6613
-0.262186	5.64075	-1.54823	0.15346	0.863657	-6.10713	FBgn0036263	thoc6
-0.29533	4.91762	-1.54788	0.153544	0.863657	-6.04883	FBgn0266756	btsz
0.852642	0.465224	1.54782	0.15356	0.863657	-5.18959	FBgn0026176	SkpB
0.995325	-0.324225	1.54685	0.15379	0.863657	-5.01532	FBgn0036690	Ilp8
-0.751713	-0.170848	-1.54621	0.153945	0.863657	-5.05319	FBgn0083975	Nlg4
0.338531	3.70201	1.54584	0.154033	0.863657	-5.88538	FBgn0039227	polybromo
-0.273498	6.62211	-1.54552	0.154108	0.863657	-6.15586	FBgn0030973	CG7332
0.387828	5.62106	1.5454	0.154139	0.863657	-6.1096	FBgn0263006	Ca-P60A
-0.310715	3.58014	-1.54473	0.154299	0.863657	-5.86483	FBgn0086895	pea
-0.531007	1.90897	-1.54468	0.154309	0.863657	-5.50578	FBgn0040348	CG3703
0.392423	3.00821	1.54456	0.154339	0.863657	-5.7502	FBgn0038381	CG3303
-0.294598	4.70388	-1.54452	0.154348	0.863657	-6.03092	FBgn0035769	CTCF
-0.246066	6.25695	-1.54425	0.154413	0.863657	-6.14525	FBgn0033421	CG1888
0.261085	10.8106	1.54406	0.154459	0.863657	-6.11024	FBgn0039359	RpL27
-0.240369	6.59133	-1.54272	0.154779	0.864255	-6.15888	FBgn0034504	CG8929
0.254642	5.30944	1.54239	0.154861	0.864255	-6.09172	FBgn0027607	CG8230
0.36059	5.00889	1.54205	0.154942	0.864255	-6.06531	FBgn0025641	DAAM
0.297902	6.7207	1.54161	0.155049	0.864255	-6.16391	FBgn0261793	Trf2
-0.938614	-1.24158	-1.54139	0.1551	0.864255	-4.84527	FBgn0039170	CG13609
-0.298428	5.28208	-1.54104	0.155184	0.864255	-6.09077	FBgn0031604	Elp3
0.453846	2.12953	1.54061	0.155288	0.864255	-5.56155	FBgn0050421	CG30421
0.307333	5.22281	1.54045	0.155326	0.864255	-6.08688	FBgn0036449	bmm
-0.622929	6.14967	-1.5401	0.155412	0.864255	-6.14464	FBgn0002735	E(spl)mgamma-HLH
0.336653	3.31923	1.53956	0.155542	0.864458	-5.8217	FBgn0037188	CG7369
1.01887	-1.10126	1.53891	0.155698	0.864804	-4.8738	FBgn0051323	CG31323
2.02458	-2.79342	1.53837	0.155829	0.865006	-4.60836	FBgn0040600	CG13631
0.540377	1.99828	1.53699	0.156163	0.866312	-5.53672	FBgn0038260	CG14855
0.525844	2.48781	1.53662	0.156253	0.866312	-5.64515	FBgn0267488	Mcr
-0.302717	5.45365	-1.53598	0.156408	0.866642	-6.1108	FBgn0030658	CG7872
0.396809	3.78962	1.5356	0.156501	0.866642	-5.9137	FBgn0032817	CG10631
0.388822	3.99548	1.53445	0.15678	0.867142	-5.94932	FBgn0004435	Galphaq
0.785523	-0.124152	1.53392	0.156909	0.867142	-5.07951	FBgn0031214	CG11374
-0.255305	6.90934	-1.53297	0.15714	0.867142	-6.17995	FBgn0039350	jigr1
-1.91769	-2.1548	-1.53284	0.157173	0.867142	-4.69232	FBgn0039444	TwdlD
1.44685	-2.41748	1.53245	0.157267	0.867142	-4.66955	FBgn0032549	CG4650
0.377488	8.19309	1.53236	0.157289	0.867142	-6.18758	FBgn0034258	eIF3-S8
-0.257157	4.75507	-1.53212	0.157348	0.867142	-6.05351	FBgn0000543	ecd
0.766631	-0.360989	1.53166	0.15746	0.867142	-5.03181	FBgn0034928	CG13562
0.289752	6.06311	1.52961	0.157962	0.868223	-6.1564	FBgn0263200	Galt
-2.10262	-2.77055	-1.52919	0.158063	0.868223	-4.61471	FBgn0035791	CG8539
-0.311429	4.25237	-1.52837	0.158265	0.868223	-5.99655	FBgn0039654	Brd8
0.323989	6.23577	1.52824	0.158296	0.868223	-6.166	FBgn0033639	CG9003
-0.405886	2.6505	-1.52683	0.158643	0.869607	-5.69663	FBgn0262962	CG43273
1.35451	-0.0510409	1.52562	0.158939	0.870338	-5.08814	FBgn0031514	CG3332
-0.23175	5.74841	-1.52552	0.158966	0.870338	-6.14484	FBgn0260987	vtd
-1.05981	0.167417	-1.52398	0.159344	0.871888	-5.14502	FBgn0015400	kek2
0.346575	3.36544	1.52317	0.159543	0.871941	-5.85257	FBgn0027538	beta4GalNAcTA
0.662183	1.25868	1.52199	0.159835	0.87302	-5.39573	FBgn0001085	fz
0.507012	3.19619	1.52034	0.160244	0.873671	-5.81994	FBgn0031678	CG31918
0.49356	1.48153	1.52021	0.160276	0.873671	-5.44775	FBgn0086450	su(r)
0.286163	9.09703	1.51961	0.160426	0.873671	-6.18654	FBgn0038400	CG5903
0.384582	5.17135	1.51946	0.160463	0.873671	-6.11044	FBgn0040250	Ugt86Dj
0.338317	3.83606	1.51899	0.160578	0.873671	-5.94485	FBgn0015277	Pi3K59F
-0.26654	8.23314	-1.5189	0.160602	0.873671	-6.20527	FBgn0004401	Pep
-0.311216	4.42381	-1.51868	0.160657	0.873671	-6.03231	FBgn0264560	garz
0.939392	-0.125192	1.51806	0.160811	0.873671	-5.09459	FBgn0033054	CG14591
1.47817	2.3343	1.51768	0.160904	0.873671	-5.61798	FBgn0030158	CG9686
-0.307773	3.70071	-1.5169	0.161098	0.874175	-5.92449	FBgn0051064	CG31064
-0.299674	5.40233	-1.51654	0.161187	0.874175	-6.13337	FBgn0039241	CG11089
-0.731926	0.723558	-1.51577	0.161379	0.874396	-5.28595	FBgn0265191	Glycogenin
0.975741	1.04384	1.51463	0.161665	0.874396	-5.35294	FBgn0014343	mirr
0.415463	3.53363	1.51395	0.161836	0.874396	-5.89708	FBgn0021761	Nup154
-0.28316	8.5114	-1.51381	0.16187	0.874396	-6.20735	FBgn0262468	vib
-0.272818	7.60902	-1.51339	0.161975	0.874396	-6.21551	FBgn0025463	Bap60
0.313746	8.03685	1.51235	0.162236	0.874396	-6.21625	FBgn0001941	ifc
0.410349	8.17977	1.51228	0.162253	0.874396	-6.21477	FBgn0040383	CG5254
-0.252104	6.90879	-1.51036	0.162733	0.874396	-6.21042	FBgn0263198	Acn
-0.402491	2.86754	-1.51027	0.162756	0.874396	-5.76581	FBgn0015271	Orc5
1.71645	-2.52457	1.50942	0.162971	0.874396	-4.67645	FBgn0083972	CG34136
-1.80448	-3.14944	-1.50937	0.162984	0.874396	-4.60162	FBgn0259215	Ir93a
0.334771	6.6008	1.50933	0.162994	0.874396	-6.20433	FBgn0052264	CG32264
0.387083	2.86709	1.50923	0.163018	0.874396	-5.76794	FBgn0037440	CG1041
-0.292716	7.11853	-1.50898	0.163081	0.874396	-6.21603	FBgn0036111	Aps
0.431958	2.90209	1.50887	0.163109	0.874396	-5.77486	FBgn0261239	Hr39
0.269668	4.623	1.50866	0.163162	0.874396	-6.07052	FBgn0033426	CG1814
-1.20692	-0.835256	-1.50865	0.163165	0.874396	-4.95811	FBgn0032382	Mal-B2
0.289746	7.09527	1.50849	0.163204	0.874396	-6.21632	FBgn0050000	GstT1
-0.925437	1.13999	-1.50795	0.163341	0.874396	-5.38176	FBgn0000108	Appl
0.238019	7.36753	1.50768	0.16341	0.874396	-6.22132	FBgn0030719	eIF5
1.51848	-2.84049	1.50764	0.163419	0.874396	-4.64241	FBgn0264339	CG43795
-0.410969	4.20822	-1.50749	0.163457	0.874396	-6.01727	FBgn0052133	ptip
1.95861	-2.72789	1.50728	0.16351	0.874396	-4.64833	FBgn0046332	gskt
0.302249	4.13388	1.50541	0.163982	0.874587	-6.0105	FBgn0042213	CG18731
-0.268248	5.68402	-1.50504	0.164076	0.874587	-6.16817	FBgn0035035	CG3570
1.61866	-1.8659	1.50482	0.164132	0.874587	-4.77325	FBgn0026565	CG1315
1.03938	-1.16705	1.50396	0.164349	0.874587	-4.90499	FBgn0040670	e(y)2b
-0.302748	5.80082	-1.50391	0.164361	0.874587	-6.17683	FBgn0010926	l(3)07882
-0.280104	5.69552	-1.50328	0.164521	0.874587	-6.17124	FBgn0002973	numb
0.255883	4.71125	1.50268	0.164672	0.874587	-6.08862	FBgn0031069	Pmp70
0.641415	1.72611	1.50239	0.164747	0.874587	-5.52153	FBgn0036953	CG17145
-0.335983	5.07693	-1.50239	0.164748	0.874587	-6.12513	FBgn0030346	CG11802
1.15025	-0.420367	1.50236	0.164756	0.874587	-5.04961	FBgn0031636	CG12194
-0.275357	6.56298	-1.50217	0.164804	0.874587	-6.21268	FBgn0261380	mRpL37
-0.361796	6.38681	-1.50188	0.164876	0.874587	-6.20695	FBgn0033635	CG7777
-0.351958	4.75939	-1.50079	0.165155	0.875537	-6.09558	FBgn0052758	CG32758
0.22935	6.97038	1.50043	0.165246	0.875537	-6.22498	FBgn0031684	CG8680
1.70697	7.87185	1.49988	0.165387	0.875777	-6.22438	FBgn0040060	yip7
2.08554	-1.99055	1.49892	0.165632	0.876571	-4.75222	FBgn0033917	CG8503
-0.264093	6.57586	-1.4983	0.165789	0.876901	-6.21824	FBgn0050159	CG30159
-0.308291	6.61677	-1.49741	0.166016	0.876985	-6.22046	FBgn0035374	mRpS35
0.444597	2.9904	1.49737	0.166026	0.876985	-5.8086	FBgn0030228	BTBD9
2.09305	-1.72092	1.49712	0.166091	0.876985	-4.79903	FBgn0030170	CG2990
0.599579	1.38239	1.49649	0.16625	0.877321	-5.45616	FBgn0052572	CG32572
1.33807	-1.88624	1.49609	0.166353	0.877359	-4.78812	FBgn0038309	CG6499
0.253189	5.04407	1.49572	0.16645	0.877366	-6.13149	FBgn0030946	CG6659
2.34862	-3.73036	1.49463	0.166728	0.877515	-4.57523	FBgn0034887	St1
0.347968	4.71981	1.4946	0.166735	0.877515	-6.09962	FBgn0039920	CG11360
0.873955	0.766428	1.49323	0.167087	0.877515	-5.32327	FBgn0036836	CG11619
0.535916	4.51481	1.4931	0.167121	0.877515	-6.07612	FBgn0010041	GstD5
-0.266627	4.50029	-1.49298	0.167151	0.877515	-6.07658	FBgn0038855	CG5745
0.647856	1.56798	1.49281	0.167195	0.877515	-5.50066	FBgn0032908	CG9270
1.64741	-1.98352	1.49263	0.167243	0.877515	-4.77512	FBgn0052436	CG32436
0.369807	3.11741	1.49227	0.167335	0.877515	-5.8435	FBgn0037163	laza
-0.23066	8.55843	-1.49226	0.167337	0.877515	-6.23535	FBgn0028686	Rpt3
-0.270218	5.34659	-1.49134	0.167574	0.87826	-6.16286	FBgn0010287	Trf
1.30211	-1.48705	1.48945	0.168063	0.879609	-4.86063	FBgn0050099	CG30099
-0.261637	4.60382	-1.48915	0.16814	0.879609	-6.09414	FBgn0039335	Vps33B
-0.319767	6.95721	-1.48849	0.16831	0.879609	-6.24047	FBgn0052409	CG32409
-0.383192	3.77079	-1.48764	0.168529	0.88008	-5.97432	FBgn0030717	CG8931
-0.261408	6.19672	-1.4874	0.168591	0.88008	-6.21918	FBgn0019686	lok
-0.333753	5.95285	-1.48685	0.168736	0.880334	-6.20802	FBgn0039360	CLS
0.83261	4.78363	1.48645	0.168839	0.880375	-6.11188	FBgn0036422	CG3868
0.241671	5.04005	1.48481	0.169265	0.880839	-6.14566	FBgn0031661	Gmd
1.08422	-1.55303	1.48441	0.169369	0.880839	-4.86019	FBgn0039916	CG9935
-0.283696	5.32516	-1.48404	0.169464	0.880839	-6.17079	FBgn0000617	e(y)1
0.235632	6.07847	1.48323	0.169675	0.880839	-6.21939	FBgn0030350	SelG
0.773187	0.0260149	1.48258	0.169846	0.880839	-5.17635	FBgn0036769	Tsp74F
0.307571	4.47343	1.48116	0.170215	0.880839	-6.08909	FBgn0025815	Mcm6
0.389638	3.15974	1.48016	0.170476	0.880839	-5.86871	FBgn0032744	Ttc19
1.78475	-1.78573	1.48013	0.170485	0.880839	-4.81191	FBgn0031042	CG14221
1.06188	-1.36031	1.47961	0.17062	0.880839	-4.89896	FBgn0263655	CG43646
-1.92134	-2.52752	-1.47954	0.170638	0.880839	-4.70219	FBgn0030716	CG9170
-0.304327	3.87769	-1.47892	0.170802	0.880839	-6.0052	FBgn0038300	CG4203
-1.07643	-1.75406	-1.47833	0.170958	0.880839	-4.83321	FBgn0003137	Ppn
-0.431414	2.76175	-1.47812	0.171013	0.880839	-5.78523	FBgn0015520	nonA-l
0.823976	-0.274621	1.47807	0.171026	0.880839	-5.11676	FBgn0029795	CG15773
-0.327692	6.09623	-1.4779	0.171069	0.880839	-6.22703	FBgn0031824	CG9547
0.336899	3.43725	1.47768	0.171126	0.880839	-5.92711	FBgn0010350	CdsA
0.650946	0.653202	1.47766	0.171133	0.880839	-5.32402	FBgn0033128	Tsp42Eg
-0.85156	0.429702	-1.4775	0.171175	0.880839	-5.26755	FBgn0035287	CG13937
1.50339	-0.0168174	1.47617	0.171524	0.880839	-5.14585	FBgn0027611	LM408
-0.253588	4.83767	-1.47531	0.171749	0.880839	-6.13836	FBgn0030915	CG6179
-0.338769	4.5855	-1.47505	0.171818	0.880839	-6.11016	FBgn0017418	ari-1
-1.51432	-2.7043	-1.47498	0.171838	0.880839	-4.69616	FBgn0259737	CG42391
0.353565	3.72687	1.47464	0.171926	0.880839	-5.98483	FBgn0037492	CG10050
-0.225424	5.54222	-1.47435	0.172003	0.880839	-6.19988	FBgn0259243	Pka-R1
0.269015	8.12464	1.47422	0.172037	0.880839	-6.26646	FBgn0262735	Imp
0.252779	9.39463	1.47421	0.172039	0.880839	-6.23999	FBgn0033902	Tango7
-0.328581	3.5925	-1.47417	0.172051	0.880839	-5.96118	FBgn0031413	CG9967
-1.12555	-1.54272	-1.47396	0.172106	0.880839	-4.87339	FBgn0033296	Mal-A7
-0.26516	6.51738	-1.47387	0.172129	0.880839	-6.24899	FBgn0265998	Doa
-0.946951	-1.36888	-1.47271	0.172436	0.880839	-4.90667	FBgn0035513	Cpr64Ad
-1.82538	-2.64917	-1.47271	0.172436	0.880839	-4.69998	FBgn0000639	Fbp1
-0.935161	-0.886307	-1.47187	0.172658	0.880839	-4.99687	FBgn0267429	CG45782
0.228758	5.90211	1.47177	0.172685	0.880839	-6.22548	FBgn0053113	Rtnl1
-0.372798	2.57632	-1.47131	0.172806	0.880839	-5.75361	FBgn0039623	CG1951
-0.550677	2.47488	-1.47131	0.172806	0.880839	-5.72814	FBgn0038257	smp-30
-0.277225	4.28856	-1.47013	0.173118	0.880839	-6.07943	FBgn0034184	CG9646
0.363105	3.59058	1.47001	0.17315	0.880839	-5.96633	FBgn0023180	Orc6
-1.02603	-0.408447	-1.46984	0.173194	0.880839	-5.09293	FBgn0085371	CG34342
0.510676	1.24559	1.46943	0.173305	0.880839	-5.46353	FBgn0050495	CG30495
0.280492	6.02354	1.46942	0.173306	0.880839	-6.23479	FBgn0031637	mxt
-0.36109	5.49895	-1.46942	0.173306	0.880839	-6.20277	FBgn0033638	CG9005
-0.284539	4.40004	-1.46901	0.173415	0.880839	-6.09547	FBgn0036402	CG6650
0.44759	1.84448	1.46859	0.173526	0.880839	-5.5941	FBgn0004860	ph-d
0.787792	-0.0498211	1.46813	0.173648	0.880839	-5.17917	FBgn0010043	GstD7
0.418395	3.27036	1.46716	0.173908	0.880839	-5.90781	FBgn0262647	Nup160
0.339387	4.23278	1.46674	0.174018	0.880839	-6.07585	FBgn0030246	CG1582
0.347999	3.73582	1.46667	0.174038	0.880839	-5.99709	FBgn0266670	Sec5
0.276875	4.85995	1.46648	0.174089	0.880839	-6.15217	FBgn0030038	CG1440
-0.293132	4.72186	-1.46644	0.174099	0.880839	-6.13726	FBgn0034527	CG9945
-1.97471	-2.87245	-1.46519	0.174433	0.882042	-4.68281	FBgn0038565	CG7794
-0.331249	6.67004	-1.46162	0.175386	0.886375	-6.26934	FBgn0036004	Jarid2
0.313136	3.52804	1.46017	0.175777	0.886499	-5.96797	FBgn0037792	TAF1B
0.30341	5.51639	1.46013	0.175787	0.886499	-6.21688	FBgn0027948	msps
0.231365	5.85048	1.4601	0.175796	0.886499	-6.23802	FBgn0038678	mRpL55
-0.241629	6.97897	-1.45808	0.176339	0.886807	-6.28119	FBgn0030990	CG7556
0.484995	1.63873	1.45804	0.176348	0.886807	-5.56285	FBgn0051004	mesh
-2.10117	-2.44665	-1.45753	0.176486	0.886807	-4.7356	FBgn0034070	SP2353
-0.984081	-0.932063	-1.45748	0.176499	0.886807	-5.00371	FBgn0033836	CG18278
-0.399965	5.33821	-1.45729	0.176552	0.886807	-6.20662	FBgn0263240	Coop
0.882021	-0.932219	1.45719	0.176579	0.886807	-5.00801	FBgn0260005	wtrw
0.41019	2.93439	1.45714	0.176591	0.886807	-5.85007	FBgn0000442	Pkg21D
-0.866907	-0.183343	-1.45563	0.176999	0.886807	-5.16504	FBgn0010620	Sip1
0.255305	8.95131	1.45537	0.17707	0.886807	-6.27539	FBgn0025366	Ip259
1.11239	-1.45772	1.4553	0.177087	0.886807	-4.91214	FBgn0034075	Asph
0.359105	8.67379	1.45518	0.17712	0.886807	-6.28191	FBgn0036007	path
0.317047	5.3889	1.45361	0.177546	0.886807	-6.21595	FBgn0004395	unk
0.98768	-1.4024	1.45319	0.17766	0.886807	-4.92539	FBgn0053469	CG33469
-0.281025	6.51323	-1.45316	0.177668	0.886807	-6.27606	FBgn0037621	M1BP
-0.2568	7.29926	-1.45199	0.177986	0.886807	-6.29426	FBgn0036918	CG7770
-0.343869	3.9899	-1.45186	0.17802	0.886807	-6.05872	FBgn0028895	CG17328
-0.306153	4.72466	-1.4514	0.178145	0.886807	-6.15719	FBgn0037942	CG14721
0.319168	6.11019	1.45022	0.178466	0.886807	-6.26407	FBgn0034245	CG14482
0.540844	2.60748	1.44958	0.178642	0.886807	-5.78714	FBgn0020312	CG4050
0.343922	3.40714	1.44948	0.178668	0.886807	-5.95838	FBgn0039016	Dcr-1
1.21342	-1.63838	1.44927	0.178726	0.886807	-4.88585	FBgn0050285	CG30285
-1.1785	-1.31632	-1.44892	0.178821	0.886807	-4.93976	FBgn0032911	tadr
1.03424	-0.13357	1.44871	0.178878	0.886807	-5.17837	FBgn0030777	CG9672
-0.270171	7.33583	-1.44831	0.178988	0.886807	-6.29947	FBgn0015777	nrv2
0.323813	8.01603	1.44806	0.179054	0.886807	-6.30159	FBgn0020224	Cbl
1.78648	-2.70271	1.44769	0.179156	0.886807	-4.72165	FBgn0033791	Drl-2
1.55828	-1.98477	1.44768	0.179159	0.886807	-4.82984	FBgn0051547	CG31547
0.492332	2.59014	1.44738	0.179241	0.886807	-5.78691	FBgn0023549	Mct1
1.02779	-0.536199	1.44651	0.179479	0.886807	-5.09396	FBgn0053511	CG33511
0.717671	0.753429	1.44644	0.179497	0.886807	-5.38432	FBgn0028408	Drep-2
1.98091	-2.9121	1.44628	0.179541	0.886807	-4.69931	FBgn0022700	Cht4
-0.238357	7.91382	-1.44613	0.179582	0.886807	-6.30479	FBgn0015283	Rpn10
0.774029	0.392678	1.44609	0.179593	0.886807	-5.30403	FBgn0035186	CG13912
-0.2825	4.88515	-1.44607	0.179601	0.886807	-6.18136	FBgn0037881	GCC88
0.925512	-0.838341	1.44568	0.179705	0.886807	-5.03964	FBgn0038866	CG5810
2.26025	-3.48269	1.44547	0.179764	0.886807	-4.63603	FBgn0040359	CG11380
0.309756	3.75769	1.44499	0.179895	0.886807	-6.02953	FBgn0033169	CG11123
0.528388	1.81547	1.44495	0.179907	0.886807	-5.61792	FBgn0037931	CG18476
-0.625526	1.62109	-1.4442	0.180111	0.88682	-5.57343	FBgn0050502	fa2h
-0.282687	4.05791	-1.4436	0.180277	0.88682	-6.08056	FBgn0261532	cdm
-0.241019	5.44201	-1.44304	0.180431	0.88682	-6.23383	FBgn0022724	Taf8
0.361173	3.02447	1.44275	0.180509	0.88682	-5.8895	FBgn0040382	CG5273
-0.281341	5.7423	-1.44269	0.180526	0.88682	-6.25422	FBgn0033019	CG10395
0.314636	7.08512	1.44249	0.180582	0.88682	-6.30342	FBgn0036837	CG18135
-0.254592	6.35079	-1.44248	0.180584	0.88682	-6.28454	FBgn0030720	CG8939
-0.270009	6.72327	-1.44088	0.181023	0.888502	-6.29808	FBgn0032801	CG10165
-0.255597	6.09108	-1.44028	0.181191	0.88865	-6.27639	FBgn0015805	Rpd3
0.375564	6.29846	1.44007	0.181247	0.88865	-6.28547	FBgn0034583	CG10527
2.09178	-2.69325	1.43847	0.18169	0.89009	-4.73245	FBgn0033999	CG8093
0.309372	8.07465	1.43831	0.181734	0.89009	-6.31392	FBgn0025879	Timp
0.291221	4.7218	1.43784	0.181863	0.890247	-6.17511	FBgn0028497	CG3530
0.319291	8.75994	1.43701	0.182094	0.890536	-6.30376	FBgn0085436	Not1
-0.235227	5.14915	-1.43669	0.182183	0.890536	-6.21867	FBgn0042712	HBS1
0.419649	5.40983	1.43644	0.182252	0.890536	-6.23949	FBgn0029504	CHES-1-like
-0.259961	7.35619	-1.43597	0.182382	0.890536	-6.3158	FBgn0024364	CG11417
-1.76065	-3.21469	-1.43522	0.18259	0.890536	-4.67749	FBgn0069913	CG4681
1.49588	-0.157389	1.43474	0.182723	0.890536	-5.16807	FBgn0051300	CG31300
-0.323661	3.36248	-1.43454	0.18278	0.890536	-5.96932	FBgn0034304	CG5742
-0.209984	6.95438	-1.43378	0.182989	0.890536	-6.3125	FBgn0030321	CG1703
0.310678	5.60677	1.43358	0.183044	0.890536	-6.25752	FBgn0032642	CG5110
-0.231075	6.69053	-1.43327	0.183131	0.890536	-6.3072	FBgn0004507	GlyP
-0.283235	4.38961	-1.4331	0.183178	0.890536	-6.14109	FBgn0035978	UGP
-0.327941	4.84646	-1.4331	0.18318	0.890536	-6.19425	FBgn0039544	CG12877
-0.290357	4.48392	-1.4326	0.183318	0.890734	-6.15375	FBgn0051915	CG31915
0.417431	4.08764	1.43173	0.18356	0.890932	-6.0991	FBgn0020762	Atet
1.26214	-1.20517	1.43159	0.1836	0.890932	-4.97842	FBgn0031732	CG11149
-0.385838	2.71466	-1.43048	0.183909	0.891721	-5.83753	FBgn0033993	CG8089
-0.220024	5.88615	-1.4286	0.184436	0.893714	-6.28109	FBgn0037539	CG10435
-0.223146	8.19337	-1.42824	0.184537	0.893714	-6.3257	FBgn0034645	CG10320
-0.225665	7.06884	-1.42765	0.184702	0.893714	-6.32254	FBgn0030991	CG7453
-0.269206	6.80846	-1.42748	0.18475	0.893714	-6.31747	FBgn0261811	pico
-0.328384	5.86427	-1.42722	0.184823	0.893714	-6.2813	FBgn0026427	Su(var)2-HP2
-0.803329	1.57021	-1.42643	0.185044	0.893714	-5.58057	FBgn0033214	CG1941
-0.373764	5.31574	-1.42614	0.185125	0.893714	-6.24554	FBgn0036522	CG7372
0.587294	2.48805	1.4256	0.185277	0.893714	-5.79058	FBgn0019990	Gcn2
-0.464181	1.79631	-1.42505	0.185432	0.893714	-5.63944	FBgn0037185	CG11367
0.336505	3.10822	1.42493	0.185466	0.893714	-5.93008	FBgn0029006	Smurf
-0.26301	4.77074	-1.42451	0.185584	0.893714	-6.19747	FBgn0031876	Atac1
-1.59781	-1.28562	-1.42443	0.185607	0.893714	-4.96323	FBgn0262123	l(2)41Ab
-0.244499	4.98564	-1.4239	0.185756	0.893714	-6.22028	FBgn0004643	Zw10
2.76406	-3.33392	1.42357	0.185847	0.893714	-4.66904	FBgn0035780	CG18417
-1.38625	-0.800106	-1.42346	0.18588	0.893714	-5.06258	FBgn0029606	CG14052
1.60938	-1.23341	1.42312	0.185975	0.893714	-4.97915	FBgn0264272	mwh
0.778754	0.171652	1.42192	0.186314	0.893714	-5.28313	FBgn0259171	Pde9
-0.314569	5.40075	-1.42178	0.186353	0.893714	-6.25817	FBgn0039261	CG6422
-0.39386	2.52726	-1.42064	0.186676	0.893714	-5.80813	FBgn0034853	Ice1
-0.20808	6.31108	-1.42029	0.186773	0.893714	-6.31191	FBgn0032516	CG9293
0.799359	-0.339964	1.42	0.186858	0.893714	-5.17429	FBgn0035265	CG18173
-0.263564	5.76052	-1.41947	0.187008	0.893714	-6.2855	FBgn0036248	ssp
0.376127	3.57532	1.41903	0.187132	0.893714	-6.02927	FBgn0032748	CG10492
0.330097	4.61946	1.41887	0.187178	0.893714	-6.18787	FBgn0010470	Fkbp14
0.274091	7.3719	1.4176	0.187537	0.893714	-6.33981	FBgn0261618	larp
-0.258602	6.09838	-1.41682	0.18776	0.893714	-6.30713	FBgn0086712	Egm
-0.412373	5.66254	-1.41671	0.18779	0.893714	-6.28237	FBgn0051510	CG31510
-0.207819	7.41047	-1.41645	0.187865	0.893714	-6.34175	FBgn0011584	Trp1
-0.344618	4.651	-1.41639	0.187882	0.893714	-6.19399	FBgn0033132	Tsp42Ej
0.491774	3.17734	1.41473	0.188354	0.893714	-5.95514	FBgn0264753	Rgk1
-0.294276	6.41971	-1.41456	0.188402	0.893714	-6.32295	FBgn0086361	alph
-0.356801	4.15783	-1.41452	0.188414	0.893714	-6.13258	FBgn0053182	Kdm4B
4.72749	-1.45748	1.4144	0.188449	0.893714	-4.81023	FBgn0261575	tobi
-0.362077	4.53682	-1.41381	0.188616	0.893714	-6.18393	FBgn0001078	ftz-f1
-1.01434	-1.01442	-1.41317	0.188799	0.893714	-5.04236	FBgn0052017	CG32017
-0.26616	5.30544	-1.41266	0.188943	0.893714	-6.26252	FBgn0020272	mst
-0.235177	11.7065	-1.41135	0.189319	0.893714	-6.26112	FBgn0003887	betaTub56D
0.283385	5.49566	1.41114	0.18938	0.893714	-6.27917	FBgn0029594	CG14806
-0.443495	7.45732	-1.41091	0.189447	0.893714	-6.34883	FBgn0035806	PGRP-SD
1.14931	0.535168	1.4104	0.189591	0.893714	-5.36561	FBgn0010497	dmGlut
0.878719	0.583956	1.41022	0.189644	0.893714	-5.38512	FBgn0037870	CG18577
-0.435201	5.82939	-1.40924	0.189925	0.893714	-6.30199	FBgn0034292	CG5767
0.327746	6.74261	1.40918	0.18994	0.893714	-6.33951	FBgn0016754	sba
0.238725	6.63156	1.40897	0.190001	0.893714	-6.33717	FBgn0016917	Stat92E
0.238309	5.79812	1.40886	0.190034	0.893714	-6.30147	FBgn0029887	CG3198
-1.02211	-1.55017	-1.4088	0.190049	0.893714	-4.95181	FBgn0001075	ft
0.258794	6.3496	1.40869	0.190083	0.893714	-6.32835	FBgn0031356	CG17660
0.245916	4.89066	1.40849	0.190138	0.893714	-6.23079	FBgn0033454	CG1671
-0.246327	6.47222	-1.40809	0.190256	0.893714	-6.33324	FBgn0037182	ArfGAP3
0.286708	5.09723	1.40808	0.190258	0.893714	-6.25088	FBgn0046692	Stlk
0.768509	1.58874	1.40804	0.190269	0.893714	-5.60943	FBgn0031703	CG12512
0.275702	3.68743	1.40742	0.190447	0.893714	-6.06572	FBgn0000482	dor
-1.21227	-0.962244	-1.40728	0.190487	0.893714	-5.05622	FBgn0069354	Porin2
0.849741	-0.48173	1.40691	0.190593	0.893714	-5.16029	FBgn0038191	CG9925
0.398898	3.8161	1.40643	0.190733	0.893714	-6.08828	FBgn0037240	Cont
0.336141	6.31774	1.40629	0.190772	0.893714	-6.32996	FBgn0035763	CG8602
0.359531	3.14534	1.40605	0.190842	0.893714	-5.96168	FBgn0032521	CG7110
-1.53345	-2.58247	-1.40591	0.190882	0.893714	-4.78692	FBgn0035113	pyx
0.625958	0.96748	1.40577	0.190922	0.893714	-5.48378	FBgn0053172	CG33172
0.27258	9.17397	1.4057	0.190943	0.893714	-6.3345	FBgn0021872	Xbp1
-0.250847	4.64785	-1.40527	0.191066	0.893714	-6.20879	FBgn0040206	krz
-0.236903	5.50402	-1.40512	0.19111	0.893714	-6.28723	FBgn0039966	Rab21
0.544449	3.93232	1.40452	0.191284	0.893714	-6.10783	FBgn0039319	CG13659
1.41667	-0.140839	1.40273	0.191802	0.893714	-5.21811	FBgn0051102	CG31102
-0.259957	4.51698	-1.40257	0.191847	0.893714	-6.19653	FBgn0033924	CG8613
-0.284278	4.89852	-1.40176	0.192082	0.893714	-6.2398	FBgn0032105	borr
-0.246261	6.49731	-1.40163	0.192119	0.893714	-6.34236	FBgn0037150	CG7133
-0.286749	3.98768	-1.40084	0.19235	0.893714	-6.12449	FBgn0035025	uri
-0.21723	6.68691	-1.40052	0.192441	0.893714	-6.34933	FBgn0027055	CSN3
-0.266154	5.63109	-1.39951	0.192736	0.893714	-6.30293	FBgn0037583	CG9684
-0.220716	7.35126	-1.39943	0.192758	0.893714	-6.36291	FBgn0036058	CG6707
-0.221445	7.74209	-1.39922	0.19282	0.893714	-6.36573	FBgn0038805	TFAM
0.255031	4.37978	1.3991	0.192853	0.893714	-6.18421	FBgn0031813	CG9527
-0.247367	6.24629	-1.39909	0.192858	0.893714	-6.33641	FBgn0028965	A16
0.538777	1.35726	1.39908	0.192859	0.893714	-5.57672	FBgn0030017	CG2278
0.255798	4.28398	1.39883	0.192932	0.893714	-6.17135	FBgn0037234	CG9795
-0.24704	5.69926	-1.3988	0.192942	0.893714	-6.30821	FBgn0022213	Cas
0.381104	3.7311	1.39774	0.19325	0.893714	-6.08485	FBgn0003475	spir
-0.235931	7.92188	-1.39764	0.19328	0.893714	-6.3674	FBgn0035043	CG4781
-0.233668	5.26474	-1.3967	0.193555	0.893714	-6.27989	FBgn0042094	Adk3
0.234612	5.86613	1.39631	0.193667	0.893714	-6.32149	FBgn0036932	CG14184
-1.28768	-1.2839	-1.39618	0.193706	0.893714	-5.00318	FBgn0260795	CG42575
-0.74115	-0.0578566	-1.39527	0.19397	0.893714	-5.26737	FBgn0003480	spn-B
-0.279514	4.07859	-1.39495	0.194066	0.893714	-6.14636	FBgn0036053	iPLA2-VIA
0.311607	4.26651	1.39483	0.194099	0.893714	-6.17377	FBgn0030479	Rbp1-like
0.27037	9.70965	1.39444	0.194213	0.893714	-6.33587	FBgn0086710	RpL30
-0.949046	-1.24339	-1.39421	0.194282	0.893714	-5.02464	FBgn0039498	CG17991
2.03585	-2.5424	1.39414	0.194302	0.893714	-4.79909	FBgn0031533	CG2772
-0.851537	-0.233257	-1.39395	0.194358	0.893714	-5.22863	FBgn0053696	CNMaR
-1.54228	-3.07587	-1.39382	0.194395	0.893714	-4.74092	FBgn0039255	CG13646
-1.48955	-2.102	-1.39315	0.194592	0.893714	-4.87223	FBgn0052396	CG32396
1.83296	-2.42785	1.3927	0.194725	0.893714	-4.81903	FBgn0054045	CG34045
-0.344862	4.02443	-1.3925	0.194781	0.893714	-6.14031	FBgn0014127	barr
0.300348	3.501	1.39205	0.194915	0.893714	-6.05067	FBgn0026369	Sara
1.10919	-0.81984	1.392	0.194929	0.893714	-5.10419	FBgn0030005	CG2120
1.13751	-0.873726	1.39134	0.195122	0.893714	-5.09149	FBgn0037409	Osi24
-0.216238	6.58119	-1.39126	0.195145	0.893714	-6.35819	FBgn0031106	Syx16
-0.250928	6.53411	-1.39068	0.195318	0.893714	-6.35748	FBgn0034537	DMAP1
2.07996	-4.25401	1.39035	0.195414	0.893714	-4.65877	FBgn0034045	CG8249
0.428051	2.68275	1.38997	0.195524	0.893714	-5.88159	FBgn0032348	CG4751
1.17633	-0.546105	1.38897	0.19582	0.893714	-5.16302	FBgn0053494	CG33494
0.331174	3.32638	1.38871	0.195898	0.893714	-6.02066	FBgn0033273	Gasz
0.308991	3.74712	1.38833	0.196008	0.893714	-6.10023	FBgn0034308	CG10915
0.639648	-0.0105283	1.38787	0.196144	0.893714	-5.28987	FBgn0032478	CG5458
-0.413163	3.13437	-1.38769	0.196198	0.893714	-5.98201	FBgn0040212	Dhap-at
-0.299089	4.2861	-1.38767	0.196205	0.893714	-6.18547	FBgn0022699	D19B
-1.90582	-1.91972	-1.38754	0.196243	0.893714	-4.89787	FBgn0034467	CG15128
0.473928	5.90857	1.3868	0.19646	0.893714	-6.33501	FBgn0034718	wdp
-0.251778	6.29695	-1.38615	0.196653	0.893714	-6.35497	FBgn0038546	CG7379
-0.327874	2.90148	-1.38573	0.196778	0.893714	-5.93576	FBgn0034270	CG6401
-0.303127	5.10758	-1.38553	0.196835	0.893714	-6.28022	FBgn0036771	CG14353
-0.279339	4.02389	-1.38536	0.196885	0.893714	-6.14992	FBgn0013753	Bgb
-0.231943	6.56662	-1.38536	0.196886	0.893714	-6.36524	FBgn0262115	CG17683
-0.248396	8.8303	-1.38531	0.1969	0.893714	-6.36856	FBgn0039467	CG14253
-0.348472	5.58677	-1.38473	0.197072	0.893714	-6.31842	FBgn0025571	SF1
-0.300489	4.26143	-1.38471	0.197079	0.893714	-6.18605	FBgn0032877	CG2617
0.574716	1.71065	1.38439	0.197175	0.893714	-5.67119	FBgn0030466	CG15744
1.7137	-2.77511	1.38409	0.197263	0.893714	-4.78417	FBgn0040096	lectin-33A
1.62199	0.386857	1.38404	0.197276	0.893714	-5.35389	FBgn0020508	Ag5r2
0.292765	5.11194	1.38346	0.197451	0.893714	-6.28356	FBgn0031359	Rim2
-0.317444	5.35968	-1.38303	0.197577	0.893714	-6.30443	FBgn0029131	Debcl
-0.384089	3.64819	-1.38291	0.197613	0.893714	-6.0888	FBgn0262160	CG9932
-0.239495	6.75584	-1.38284	0.197633	0.893714	-6.37351	FBgn0053129	CG33129
0.252786	12.0839	1.38281	0.197644	0.893714	-6.28664	FBgn0017545	RpS3A
0.41652	3.37185	1.3822	0.197824	0.893714	-6.03683	FBgn0004864	hop
-0.629603	1.42283	-1.38191	0.197911	0.893714	-5.6105	FBgn0051446	CG31446
-0.30188	3.98086	-1.38097	0.198191	0.893714	-6.14859	FBgn0051457	CG31457
0.324557	4.30917	1.38094	0.198198	0.893714	-6.19725	FBgn0031777	CG9154
-0.465744	2.49231	-1.38079	0.198244	0.893714	-5.85043	FBgn0033115	Spn42De
0.999589	-0.468899	1.38074	0.198257	0.893714	-5.1887	FBgn0037090	Est-Q
0.284139	4.59078	1.37993	0.1985	0.893714	-6.23452	FBgn0037530	CG2943
-0.375931	3.47412	-1.37985	0.198523	0.893714	-6.06011	FBgn0023130	a6
0.487221	1.2228	1.37942	0.198651	0.893714	-5.5728	FBgn0034093	CG15706
-0.221352	7.46236	-1.37939	0.198659	0.893714	-6.38955	FBgn0260439	Pp2A-29B
0.289137	5.13664	1.37847	0.198936	0.893714	-6.29217	FBgn0035337	CG15877
-0.252781	5.67579	-1.37835	0.198972	0.893714	-6.3327	FBgn0035393	CG16753
-0.379632	4.25017	-1.37786	0.199118	0.893714	-6.19179	FBgn0037885	CG17721
-0.238887	5.69633	-1.37766	0.199177	0.893714	-6.33495	FBgn0015000	betaggt-I
-0.318259	3.28262	-1.37744	0.199242	0.893714	-6.02646	FBgn0034113	CG8060
-0.280397	7.14298	-1.37731	0.199283	0.893714	-6.38811	FBgn0261396	Rpn3
-0.283497	4.55311	-1.37641	0.199553	0.894486	-6.23405	FBgn0043796	CG12219
-0.25563	8.75149	-1.37504	0.199961	0.89549	-6.38337	FBgn0261394	Prosalpha3
1.69878	-3.10398	1.37472	0.200057	0.89549	-4.75462	FBgn0039469	TwdlC
0.348748	3.5109	1.37468	0.200069	0.89549	-6.07404	FBgn0033259	CG11210
1.37182	-1.69746	1.37377	0.200343	0.895617	-4.96217	FBgn0033443	CG1698
1.02576	-0.889567	1.37372	0.200359	0.895617	-5.11188	FBgn0031220	CG4822
-0.930014	-1.38842	-1.37329	0.200487	0.895617	-5.02201	FBgn0011706	rpr
-0.281325	4.5791	-1.3723	0.200785	0.89649	-6.24224	FBgn0040273	Spt5
-0.250674	6.60917	-1.37103	0.201168	0.89649	-6.38452	FBgn0032393	CG12264
-0.240136	7.04746	-1.37063	0.201288	0.89649	-6.39502	FBgn0052528	parvin
-0.2818	5.50186	-1.37041	0.201356	0.89649	-6.33095	FBgn0041789	Pax
0.382319	3.69069	1.37039	0.201359	0.89649	-6.11206	FBgn0263005	CG43313
-0.333975	3.94789	-1.37036	0.20137	0.89649	-6.15609	FBgn0035483	Mul1
0.729082	0.757154	1.37008	0.201455	0.89649	-5.48096	FBgn0041709	yellow-g
-0.838286	-0.426209	-1.36973	0.201561	0.89649	-5.21554	FBgn0038926	CG13409
-0.253079	5.67795	-1.36931	0.201688	0.89649	-6.34426	FBgn0032512	CG9305
-0.341435	5.53073	-1.36909	0.201754	0.89649	-6.33444	FBgn0039633	CG11873
0.400213	2.46883	1.36762	0.202197	0.896988	-5.86167	FBgn0030930	GalNAc-T2
-0.199637	6.92539	-1.36749	0.202237	0.896988	-6.39672	FBgn0029113	Uba2
0.36818	4.60746	1.36737	0.202275	0.896988	-6.25166	FBgn0010762	simj
-1.77586	-2.1552	-1.36702	0.202379	0.896988	-4.88468	FBgn0259151	CG42266
-0.262835	6.18398	-1.36649	0.202541	0.896988	-6.3751	FBgn0030944	CG6617
0.228289	5.78581	1.36598	0.202696	0.896988	-6.35524	FBgn0025806	Rap2l
0.275701	11.6109	1.36594	0.202708	0.896988	-6.32153	FBgn0002626	RpL32
1.75974	0.669032	1.36582	0.202744	0.896988	-5.41353	FBgn0262357	CG43055
0.322638	4.411	1.3642	0.203235	0.898257	-6.23176	FBgn0036566	ClC-c
0.615477	0.215303	1.36376	0.203371	0.898257	-5.37045	FBgn0046689	Takl1
-0.204087	6.28674	-1.36372	0.203382	0.898257	-6.38302	FBgn0036484	Pex3
-0.229186	5.85455	-1.36321	0.203537	0.898257	-6.36267	FBgn0035236	CG12004
0.279177	8.37485	1.36189	0.20394	0.898257	-6.40766	FBgn0021776	mira
0.219126	6.51849	1.36168	0.204004	0.898257	-6.39392	FBgn0033241	CG2915
-0.730823	-0.423656	-1.36167	0.204007	0.898257	-5.22966	FBgn0038909	CG6569
0.322343	5.42851	1.36152	0.204052	0.898257	-6.33699	FBgn0052685	ZAP3
0.355329	2.77786	1.36136	0.2041	0.898257	-5.93894	FBgn0038115	CG7966
0.318269	5.08617	1.36135	0.204105	0.898257	-6.30893	FBgn0034071	CG8405
-0.240316	8.50777	-1.36065	0.204317	0.898404	-6.40663	FBgn0039869	CG1890
-0.940444	-1.04426	-1.3606	0.204334	0.898404	-5.09908	FBgn0004118	nAChRbeta2
-0.245128	5.86105	-1.3598	0.204577	0.898484	-6.36727	FBgn0263391	hts
1.72779	-2.06519	1.35953	0.204661	0.898484	-4.90661	FBgn0029172	Fad2
0.466389	2.14461	1.35894	0.20484	0.898484	-5.7989	FBgn0031655	Marcal1
-0.631919	-0.136803	-1.35891	0.204849	0.898484	-5.29666	FBgn0250816	AGO3
2.01428	-1.03476	1.35867	0.204925	0.898484	-5.07837	FBgn0036205	CG14131
0.802861	0.427321	1.35862	0.204938	0.898484	-5.4182	FBgn0053192	MtnD
-0.205495	8.6916	-1.35799	0.20513	0.898899	-6.40616	FBgn0004868	Gdi
0.302917	4.56509	1.3574	0.205313	0.898926	-6.2598	FBgn0261574	kug
1.99592	-0.581757	1.35703	0.205425	0.898926	-5.16015	FBgn0069969	CG40498
0.494563	2.07557	1.35596	0.205755	0.898926	-5.78699	FBgn0032076	CG9510
1.47829	-0.757416	1.35565	0.205851	0.898926	-5.14938	FBgn0033904	CG18327
1.08115	-0.624496	1.35522	0.205981	0.898926	-5.1896	FBgn0036544	sff
-0.333928	2.82026	-1.35502	0.206042	0.898926	-5.95658	FBgn0250732	gfzf
0.389616	2.47268	1.35453	0.206195	0.898926	-5.87915	FBgn0263047	CG43342
0.375811	3.2426	1.35434	0.206251	0.898926	-6.04677	FBgn0034387	Cyp12b2
0.193955	7.49665	1.35389	0.206392	0.898926	-6.42195	FBgn0030364	CG15735
0.24392	7.12139	1.35367	0.20646	0.898926	-6.41758	FBgn0031117	GstT3
-0.292745	5.56602	-1.35363	0.206471	0.898926	-6.35649	FBgn0033475	CG12129
0.369074	3.55286	1.35355	0.206497	0.898926	-6.10791	FBgn0005616	msl-2
-0.239953	6.53072	-1.3533	0.206572	0.898926	-6.40453	FBgn0040078	pont
-0.337547	2.90027	-1.35318	0.206609	0.898926	-5.97621	FBgn0010398	Lrr47
0.315636	4.3287	1.35309	0.206637	0.898926	-6.23503	FBgn0036271	Pbgs
-0.275223	3.92956	-1.35268	0.206764	0.898926	-6.17609	FBgn0051249	CG31249
-1.42147	-2.47729	-1.35257	0.206798	0.898926	-4.86516	FBgn0031694	Cyp4ac2
0.28057	5.48686	1.35194	0.206991	0.899341	-6.35347	FBgn0085229	CG34200
0.309627	4.08909	1.35104	0.20727	0.900107	-6.20294	FBgn0000180	bib
-0.241623	7.54051	-1.35074	0.207363	0.900107	-6.42612	FBgn0002174	l(2)tid
0.279217	4.9297	1.35009	0.207565	0.900556	-6.30843	FBgn0044511	mRpS21
-0.316797	5.21644	-1.349	0.207904	0.900943	-6.3358	FBgn0027594	drpr
-0.246853	5.41994	-1.34835	0.208104	0.900943	-6.3529	FBgn0036691	beg
-0.208579	6.44033	-1.34789	0.208248	0.900943	-6.40841	FBgn0261722	fwe
-0.252681	5.7968	-1.34776	0.208288	0.900943	-6.37861	FBgn0031544	CG17593
-1.19196	-2.4652	-1.34769	0.208308	0.900943	-4.87534	FBgn0264574	Glut1
0.437611	1.52554	1.34732	0.208423	0.900943	-5.67793	FBgn0029712	CG15912
0.303649	5.53783	1.347	0.208522	0.900943	-6.36306	FBgn0035001	slik
-0.270598	5.96041	-1.3468	0.208584	0.900943	-6.38898	FBgn0033104	CG15237
0.887505	-0.824714	1.34637	0.208719	0.900943	-5.1615	FBgn0053080	CG33080
0.818183	-0.056855	1.34633	0.208731	0.900943	-5.32291	FBgn0265669	CG44476
1.6473	-3.24831	1.34591	0.208861	0.901079	-4.76624	FBgn0015773	NetA
0.264256	8.21808	1.34485	0.209191	0.90165	-6.43137	FBgn0262739	AGO1
0.357084	3.03327	1.34423	0.209384	0.90165	-6.01625	FBgn0030344	CG2025
-0.228388	7.08676	-1.34412	0.209419	0.90165	-6.42891	FBgn0034936	CG2970
-0.284947	4.92827	-1.34392	0.209483	0.90165	-6.31573	FBgn0015799	Rbf
0.211807	8.28705	1.34324	0.209694	0.902004	-6.43251	FBgn0047135	CG32276
0.244291	5.64835	1.34302	0.209762	0.902004	-6.37557	FBgn0037094	CG7611
-1.09243	-0.857036	-1.34266	0.209875	0.902072	-5.15172	FBgn0036481	CG16959
-0.215599	11.8111	-1.3421	0.210049	0.902255	-6.3456	FBgn0031453	Bacc
-0.243553	4.91113	-1.34182	0.210139	0.902255	-6.31683	FBgn0032729	CG10639
-0.255211	6.31188	-1.34158	0.210212	0.902255	-6.41152	FBgn0025457	Bub3
0.65468	0.0627351	1.34037	0.210593	0.902747	-5.36284	FBgn0020371	Tim17b2
-0.285111	4.12709	-1.33956	0.210847	0.902747	-6.22314	FBgn0000499	dsh
0.843617	-0.269849	1.33916	0.21097	0.902747	-5.28738	FBgn0029719	CG15473
-0.327544	3.48302	-1.33906	0.211003	0.902747	-6.11342	FBgn0034062	CG8388
2.69928	-4.05804	1.33879	0.211088	0.902747	-4.72961	FBgn0035273	CG12020
-0.225696	4.98408	-1.33866	0.211128	0.902747	-6.32803	FBgn0052579	CG32579
0.325398	3.67375	1.33755	0.211476	0.902747	-6.15054	FBgn0035137	CG1233
-0.850413	-0.762434	-1.33727	0.211565	0.902747	-5.18555	FBgn0032399	CG6785
-0.207447	7.24163	-1.33724	0.211576	0.902747	-6.43987	FBgn0041205	key
-0.4013	2.30765	-1.33711	0.211617	0.902747	-5.86334	FBgn0031519	CG3326
-0.888507	-1.07816	-1.33692	0.211674	0.902747	-5.12243	FBgn0029995	CG2256
-0.230836	4.94899	-1.33622	0.211896	0.902747	-6.32759	FBgn0037981	Spt3
-0.303105	5.05682	-1.33591	0.211993	0.902747	-6.33793	FBgn0052343	Atac3
-0.251928	5.17239	-1.3358	0.212028	0.902747	-6.34865	FBgn0020620	RN-tre
-0.256478	4.93747	-1.33573	0.212051	0.902747	-6.32689	FBgn0260639	gammaTub23C
0.507483	3.76969	1.33495	0.212296	0.902747	-6.16854	FBgn0039464	CG6330
-0.232764	5.92225	-1.33481	0.212341	0.902747	-6.40187	FBgn0264389	opm
0.232945	5.55812	1.33449	0.212441	0.902747	-6.38016	FBgn0052000	CG32000
-0.235559	5.0279	-1.3343	0.212501	0.902747	-6.33757	FBgn0023512	eIF2B-epsilon
-0.292862	4.16914	-1.33416	0.212547	0.902747	-6.2356	FBgn0037998	CG4848
-0.266376	3.68558	-1.33313	0.212872	0.902747	-6.15874	FBgn0033935	Sin1
-0.279071	4.06016	-1.33301	0.212908	0.902747	-6.22123	FBgn0001612	Grip91
-0.332059	6.7178	-1.33219	0.213169	0.902747	-6.43583	FBgn0030993	Mec2
-0.309391	5.45721	-1.33146	0.2134	0.902747	-6.37633	FBgn0011236	ken
0.431702	2.75563	1.33086	0.213589	0.902747	-5.97108	FBgn0086655	jing
-0.637756	-0.0163404	-1.33039	0.213737	0.902747	-5.35711	FBgn0034725	CG6044
0.901727	0.290579	1.33033	0.213758	0.902747	-5.41592	FBgn0039315	CG13658
-0.312966	2.8604	-1.33032	0.213759	0.902747	-5.99594	FBgn0038407	CG6126
0.999261	0.502751	1.32993	0.213885	0.902747	-5.46077	FBgn0032225	CG5022
-0.367014	4.94616	-1.32981	0.213922	0.902747	-6.33448	FBgn0033451	CG1665
-0.31897	5.56945	-1.3297	0.213957	0.902747	-6.38633	FBgn0033177	CG11141
-0.223772	8.10645	-1.32945	0.214035	0.902747	-6.45169	FBgn0001215	Hrb98DE
0.25565	5.88775	1.32942	0.214045	0.902747	-6.40656	FBgn0035529	CG1319
-0.329967	4.64126	-1.32921	0.214112	0.902747	-6.30299	FBgn0030291	CG1738
1.76898	-3.21597	1.32908	0.214155	0.902747	-4.787	FBgn0050440	CG30440
-0.742739	0.0667066	-1.32841	0.214367	0.90291	-5.37542	FBgn0032079	CG31886
-0.495348	2.1494	-1.32834	0.21439	0.90291	-5.83799	FBgn0052057	dpr10
-0.226147	5.65506	-1.32802	0.214491	0.902924	-6.39432	FBgn0038035	lig3
-0.356815	3.52837	-1.32768	0.2146	0.902971	-6.13596	FBgn0042205	CG18764
-1.00424	-0.53892	-1.32724	0.21474	0.903147	-5.23708	FBgn0264775	CG44013
-0.590221	1.48161	-1.32661	0.214942	0.903228	-5.69121	FBgn0261873	sdt
-0.258218	6.90044	-1.32566	0.215243	0.903228	-6.44827	FBgn0030447	CG2200
0.25702	4.87905	1.32536	0.215338	0.903228	-6.33394	FBgn0036196	CG11658
-0.265291	5.08138	-1.32526	0.215372	0.903228	-6.35353	FBgn0028471	Nab2
[truncated: 11,266 more rows]

## Sheet: Pc-RNAi FDR <0.05
LogFC	AveExpr	t	PValue	FDR	B	geneID	symbol
-7.03035	2.21416	-12.7681	2.14171e-07	0.000656649	6.56016	FBgn0038290	CG6912
-6.45424	0.843226	-8.24681	1.07342e-05	0.00519648	3.24459	FBgn0028400	Syt4
-6.19489	-3.72879	-6.18481	0.000116498	0.022054	0.581874	FBgn0039523	CG12885
-6.17577	-3.71193	-5.68924	0.000223345	0.0342859	0.190818	FBgn0000137	ase
-5.14045	-3.72887	-5.25898	0.000403934	0.0492927	-0.2313	FBgn0262057	Spn77Ba
-5.09349	-3.22949	-5.23172	0.000419758	0.0494991	-0.217957	FBgn0039087	CG10168
-4.97171	0.368715	-7.37909	2.76063e-05	0.00906866	2.61597	FBgn0052085	CG32085
-3.05315	5.20387	-11.1911	7.16255e-07	0.000946556	6.55035	FBgn0000477	DNaseII
-2.474	8.16395	-7.92849	1.50424e-05	0.00601563	3.30886	FBgn0033875	CG6357
-2.4637	4.75543	-5.37222	0.000344732	0.0446598	0.155565	FBgn0038199	CCHa1
-2.26305	3.91809	-8.73283	6.53524e-06	0.00463954	4.34967	FBgn0036975	CG5618
-2.01188	3.71766	-7.07927	3.89948e-05	0.0108689	2.52551	FBgn0013277	Hsp70Ba
-1.84823	2.42295	-5.85302	0.000179458	0.0300119	1.10084	FBgn0033065	Cyp6w1
-1.80564	3.02124	-5.27997	0.000392188	0.0487479	0.222988	FBgn0003448	sna
-1.64343	2.42136	-5.70887	0.000217523	0.0342859	0.902042	FBgn0003042	Pc
-1.60558	6.5428	-7.70273	1.92299e-05	0.00736986	3.05747	FBgn0032451	spict
-1.51783	8.35934	-7.52932	2.33077e-05	0.00824553	2.8407	FBgn0023534	CG17778
-1.48966	7.53416	-8.75484	6.39335e-06	0.00463954	4.20281	FBgn0031253	CG11885
-1.34898	3.73031	-6.71249	6.03555e-05	0.015004	2.05219	FBgn0039525	CG5646
-1.33999	6.03014	-6.19127	0.00011554	0.022054	1.17836	FBgn0264776	CG44014
-1.2993	3.12773	-5.33852	0.000361311	0.0455252	0.275575	FBgn0001142	Gs1
-1.27832	5.45868	-6.32996	9.68772e-05	0.0202517	1.39361	FBgn0038476	kuk
-1.22357	3.54535	-5.56164	0.000265528	0.0379539	0.533131	FBgn0260874	Ir76a
-1.18978	8.06103	-5.57383	0.000261152	0.0379539	0.280179	FBgn0016032	lbm
-0.83455	6.15468	-5.4597	0.000305388	0.0419247	0.141554	FBgn0010548	Aldh-III
1.13158	5.30991	6.13849	0.000123633	0.0227436	1.14356	FBgn0037186	CG11241
1.31558	4.82008	7.22854	3.27922e-05	0.0104008	2.57916	FBgn0051248	CG31248
1.36784	3.84421	5.37559	0.000343118	0.0446598	0.227621	FBgn0260768	CG42566
1.37752	5.32764	5.83769	0.000183143	0.0300813	0.731964	FBgn0013771	Cyp6a9
1.517	7.52926	6.97521	4.40683e-05	0.0119218	2.16443	FBgn0086346	ALiX
1.60535	9.38153	8.56368	7.74769e-06	0.00475088	4.01462	FBgn0031747	CG9021
1.63557	2.71334	5.66562	0.000230575	0.0342859	0.806673	FBgn0033301	CG12780
1.70001	4.3808	6.81282	5.34722e-05	0.0136622	2.11714	FBgn0013995	Calx
1.78488	4.85928	6.17821	0.000117487	0.022054	1.24629	FBgn0265623	Su(z)2
1.9359	4.58763	7.93789	1.4891e-05	0.00601563	3.43726	FBgn0003082	phr
1.96107	3.24977	7.10002	3.80613e-05	0.0108689	2.5987	FBgn0034156	CG5348
2.03582	2.98504	5.49278	0.000291791	0.0406651	0.543348	FBgn0034507	CG11192
2.0494	6.59976	10.0918	1.81994e-06	0.0017092	5.5341	FBgn0260477	CG30283
2.30007	5.56713	8.41712	8.99804e-06	0.00480513	3.90426	FBgn0003495	spz
2.78651	4.66283	6.58378	7.06272e-05	0.017044	1.83642	FBgn0015399	kek1
2.86834	1.74558	8.44154	8.77523e-06	0.00480513	4.07326	FBgn0032350	CG6287
2.92388	1.26694	6.08274	0.000132851	0.0239601	1.4919	FBgn0000071	Ama
2.98487	1.83302	8.62001	7.31868e-06	0.00475088	4.24529	FBgn0037138	P5CDh1
3.11424	0.37745	5.66391	0.000231107	0.0342859	0.944219	FBgn0260429	CG42524
3.26284	1.6514	6.51109	7.72533e-05	0.017044	2.00985	FBgn0031816	CG16947
3.44528	0.565431	5.94408	0.000159158	0.0276214	1.28816	FBgn0026411	Lim1
3.47558	1.82579	5.67326	0.000228207	0.0342859	0.957088	FBgn0001235	hth
4.20081	3.67795	12.3326	2.94805e-07	0.000677905	7.36268	FBgn0053099	CG33099
4.27329	2.00604	7.55159	2.27349e-05	0.00824553	3.16566	FBgn0028490	CG31705
4.49001	0.73228	6.5261	7.58321e-05	0.017044	1.91558	FBgn0263780	CG17684
4.7311	1.52	7.14241	3.62285e-05	0.0108689	2.66629	FBgn0015037	Cyp4p1
4.75949	4.45131	15.2545	4.09301e-08	0.000188238	9.22521	FBgn0000810	fs(1)K10
5.27719	-4.19715	5.55428	0.000268211	0.0379539	-0.0156405	FBgn0038979	CG7046
5.31895	1.95769	6.518	7.65955e-05	0.017044	2.00178	FBgn0086758	chinmo
5.37711	-4.14868	5.24383	0.000412648	0.0492927	-0.272522	FBgn0036986	CG5282
5.40583	-4.14448	5.37699	0.000342453	0.0446598	-0.154783	FBgn0260011	NimC4
5.52786	-4.06766	5.69989	0.000220165	0.0342859	0.132516	FBgn0035669	CG6592
5.6044	-3.27314	5.35688	0.000352175	0.0449904	-0.0889933	FBgn0051220	CG31220
5.7496	3.60912	11.0207	8.23271e-07	0.000946556	6.31766	FBgn0000015	Abd-B
5.80783	-3.93668	6.28664	0.00010233	0.0207308	0.613496	FBgn0052750	CG32750
5.87814	-2.43888	5.24707	0.000410764	0.0492927	-0.135565	FBgn0028949	CG15254
5.99909	-3.83685	6.42732	8.57339e-05	0.0183391	0.737619	FBgn0011746	ana
6.05901	-3.82599	6.50512	7.78264e-05	0.017044	0.794912	FBgn0037811	CG12592
6.54146	-3.56609	6.27632	0.000103676	0.0207308	0.682485	FBgn0036876	CG9451
7.47613	-3.07426	6.94094	4.58921e-05	0.0120604	1.22676	FBgn0001269	inv
7.97192	-2.87098	8.05937	1.30776e-05	0.00572799	1.91879	FBgn0010114	hig
8.44127	2.95375	15.8471	2.8625e-08	0.000188238	7.7345	FBgn0033395	Cyp4p2
8.79415	-2.43314	5.88326	0.000172424	0.0293695	0.48051	FBgn0051679	Tengl3
8.80469	1.1441	11.0416	8.09229e-07	0.000946556	4.36066	FBgn0023523	Or2a
8.87792	-2.41348	8.72945	6.5573e-06	0.00463954	2.3024	FBgn0264907	CG44098
10.4586	-1.08804	11.8165	4.36287e-07	0.000802593	3.46613	FBgn0051219	CG31219

## Sheet: trx-RNAi
LogFC	AveExpr	t	PValue	FDR	B	geneID	symbol
-4.0471	5.60399	-37.894	1.1612e-09	5.19056e-06	12.9955	FBgn0033205	CG2064
-3.64191	5.58714	-32.6454	3.43416e-09	5.72622e-06	12.0464	FBgn0039411	dys
-3.07264	5.45261	-32.3127	3.69948e-09	5.72622e-06	11.9872	FBgn0040251	Ugt86Di
-5.48819	2.80132	-32.1526	3.83545e-09	5.72622e-06	11.1934	FBgn0037850	CG14695
-7.50715	2.60411	-32.1438	3.8431e-09	5.72622e-06	10.4262	FBgn0031141	CG1304
-3.3986	3.94523	-30.6781	5.39394e-09	6.8287e-06	11.5436	FBgn0023416	Ac3
-3.04866	4.43408	-30.1554	6.11069e-09	6.8287e-06	11.4835	FBgn0036290	CG10638
-8.08488	1.66957	-28.4123	9.41278e-09	7.46998e-06	9.08167	FBgn0052581	CG32581
-8.10331	1.46387	-28.3384	9.59234e-09	7.46998e-06	8.90713	FBgn0028400	Syt4
-2.6055	5.30663	-28.3038	9.67778e-09	7.46998e-06	11.0761	FBgn0010278	Ssrp
-3.46842	3.9122	-27.8633	1.08435e-08	7.46998e-06	10.9041	FBgn0038470	CG18213
-3.40536	3.68985	-27.6909	1.13427e-08	7.46998e-06	10.8472	FBgn0031971	Sirup
-3.06947	4.24351	-27.032	1.35058e-08	7.46998e-06	10.7282	FBgn0000477	DNaseII
3.32194	3.62451	26.5747	1.5283e-08	7.46998e-06	10.5877	FBgn0038461	CG3678
-3.11055	4.78223	-26.3487	1.62586e-08	7.46998e-06	10.5608	FBgn0038603	PKD
-2.90647	5.29755	-26.3198	1.63884e-08	7.46998e-06	10.5578	FBgn0040837	CG8620
-2.61874	5.11252	-26.2463	1.67237e-08	7.46998e-06	10.5379	FBgn0041180	Tep4
-3.80153	2.63447	-26.2351	1.67752e-08	7.46998e-06	10.3134	FBgn0037974	CG12224
2.63039	4.0611	25.9361	1.82273e-08	7.46998e-06	10.447	FBgn0267727	Pen
-2.78608	3.8836	-25.9057	1.83825e-08	7.46998e-06	10.4257	FBgn0035996	CG3448
-2.61219	5.91143	-25.4345	2.09958e-08	8.16096e-06	10.311	FBgn0034480	CG16898
-2.2547	5.4784	-25.0854	2.3204e-08	8.23038e-06	10.2103	FBgn0038893	CG6353
-4.78112	1.74278	-25.0388	2.35187e-08	8.23038e-06	9.5783	FBgn0053494	CG33494
-6.04858	1.21064	-24.9047	2.44507e-08	8.23038e-06	8.95714	FBgn0052625	CG32625
-2.63185	5.3437	-24.7096	2.58818e-08	8.23038e-06	10.1017	FBgn0266421	RPA3
3.09771	2.96641	24.5612	2.70348e-08	8.23038e-06	10.0125	FBgn0015721	ktub
2.16338	6.40123	24.5156	2.74006e-08	8.23038e-06	10.0406	FBgn0037976	Tk
-2.69947	3.58357	-24.4887	2.76187e-08	8.23038e-06	10.0248	FBgn0031287	CG4291
-2.42982	7.05227	-23.6702	3.53144e-08	9.55365e-06	9.786	FBgn0029766	CG15784
-2.42811	5.12245	-23.6348	3.56984e-08	9.55365e-06	9.77658	FBgn0010173	RpA-70
-2.22073	4.96775	-23.5479	3.66609e-08	9.55365e-06	9.74944	FBgn0030189	CG2909
-3.50833	2.5468	-23.4828	3.74025e-08	9.55365e-06	9.62299	FBgn0034605	CG15661
-2.77192	5.63575	-23.3193	3.93391e-08	9.64048e-06	9.67647	FBgn0033926	Arc1
2.39733	6.63311	23.2523	4.01656e-08	9.64048e-06	9.65158	FBgn0031741	CG11034
2.36435	5.1902	23.1879	4.09774e-08	9.64048e-06	9.63156	FBgn0032946	nrv3
-2.22394	4.35622	-22.6328	4.88148e-08	1.11898e-05	9.46496	FBgn0028411	Nxt1
2.53916	5.19315	22.0546	5.88377e-08	1.31502e-05	9.26067	FBgn0031126	Cyp6v1
1.96185	4.8027	21.7134	6.58421e-08	1.43568e-05	9.14363	FBgn0023534	CG17778
-2.50619	4.34968	-21.5976	6.84302e-08	1.45659e-05	9.12357	FBgn0031643	CG3008
2.60021	4.6077	21.1804	7.87613e-08	1.63529e-05	8.96897	FBgn0038147	CCHa2
2.05811	3.9811	21.1169	8.0484e-08	1.63529e-05	8.95539	FBgn0039075	CG4393
2.57187	2.73633	21.001	8.374e-08	1.66363e-05	8.92836	FBgn0010314	Cks30A
-6.56311	1.49505	-20.7623	9.09285e-08	1.76717e-05	8.13474	FBgn0034740	nsr
4.09481	2.26484	20.1478	1.12885e-07	2.14721e-05	8.57295	FBgn0038063	Octbeta2R
-1.84	4.70223	-20.0229	1.18052e-07	2.19871e-05	8.54238	FBgn0038344	CG5205
-1.94942	4.7659	-19.8607	1.25165e-07	2.28363e-05	8.48132	FBgn0052409	CG32409
-2.48667	5.11465	-19.1378	1.63392e-07	2.92145e-05	8.20256	FBgn0027073	CG4302
-2.0869	3.35327	-18.7142	1.91879e-07	3.20652e-05	8.08911	FBgn0035153	ebd1
-1.80616	4.1869	-18.7055	1.92517e-07	3.20652e-05	8.04549	FBgn0039319	CG13659
-2.16109	3.83033	-18.6404	1.97396e-07	3.20652e-05	8.04122	FBgn0031888	Pvf2
-3.30043	1.67965	-18.6396	1.97462e-07	3.20652e-05	7.9982	FBgn0031562	CG3604
-2.27077	3.557	-18.6252	1.98558e-07	3.20652e-05	8.04857	FBgn0037345	rev7
1.83137	7.07901	18.5551	2.04004e-07	3.20652e-05	7.96015	FBgn0003118	pnt
-2.16241	7.02482	-18.5235	2.06513e-07	3.20652e-05	7.94802	FBgn0264991	CG44142
-1.88248	5.36066	-18.5046	2.08029e-07	3.20652e-05	7.93262	FBgn0030778	CG4678
2.13744	3.16064	18.412	2.15659e-07	3.26779e-05	7.97095	FBgn0000405	CycB
1.79606	3.8694	18.3467	2.21219e-07	3.29616e-05	7.90514	FBgn0038680	Cyp12a5
2.55643	4.69453	18.2904	2.26149e-07	3.31438e-05	7.86257	FBgn0016032	lbm
2.64428	5.46322	18.2114	2.33287e-07	3.31628e-05	7.81376	FBgn0035743	CG15829
-1.72935	4.55744	-18.2069	2.33698e-07	3.31628e-05	7.82565	FBgn0003278	RpI135
-1.70784	5.65406	-18.125	2.41379e-07	3.34886e-05	7.76934	FBgn0030246	CG1582
-2.08279	2.97818	-18.0836	2.4536e-07	3.34886e-05	7.85096	FBgn0029999	CG1575
-1.94297	3.5365	-18.0645	2.47231e-07	3.34886e-05	7.81659	FBgn0261530	nbs
-3.1203	2.93823	-17.9703	2.56668e-07	3.42479e-05	7.81616	FBgn0264748	CG44006
-4.48294	0.550579	-17.9143	2.62477e-07	3.45081e-05	7.36033	FBgn0000146	aub
-1.6198	5.0077	-17.8365	2.70788e-07	3.4697e-05	7.65421	FBgn0037391	CG2017
-2.19234	2.88127	-17.8284	2.71677e-07	3.4697e-05	7.75147	FBgn0038056	CG5961
-1.65647	5.28737	-17.7474	2.80683e-07	3.53423e-05	7.61117	FBgn0038953	CG18596
-1.92695	3.28142	-17.6369	2.93525e-07	3.64461e-05	7.65086	FBgn0024558	Dph5
4.15732	2.1222	17.5663	3.02072e-07	3.69934e-05	7.63443	FBgn0051091	CG31091
1.86391	3.93225	17.4586	3.15671e-07	3.81365e-05	7.52805	FBgn0015396	jumu
-2.0433	3.39251	-17.3697	3.27418e-07	3.90282e-05	7.53334	FBgn0263241	Mocs1
-1.83573	4.15047	-17.2818	3.3953e-07	3.95757e-05	7.44907	FBgn0011774	Irbp
-3.27209	2.06577	-17.2575	3.42962e-07	3.95757e-05	7.5187	FBgn0033928	Arc2
-2.01143	2.92199	-17.2412	3.45292e-07	3.95757e-05	7.5019	FBgn0267449	WDY
-2.03983	3.73863	-17.0403	3.75491e-07	4.17779e-05	7.36997	FBgn0041627	Ku80
1.72593	3.53641	17.0078	3.80644e-07	4.17779e-05	7.3518	FBgn0038608	WRNexo
-2.21083	4.19185	-16.9986	3.82127e-07	4.17779e-05	7.33103	FBgn0037899	RpL24-like
2.71058	5.79746	16.9919	3.83198e-07	4.17779e-05	7.28138	FBgn0031689	Cyp28d1
1.64684	7.02798	16.8946	3.99262e-07	4.22242e-05	7.2436	FBgn0051233	CG31233
-2.56292	2.06042	-16.887	4.0055e-07	4.22242e-05	7.37517	FBgn0032390	dgt2
-1.86136	4.33128	-16.8816	4.01461e-07	4.22242e-05	7.26285	FBgn0038302	CG4210
-2.38183	3.00468	-16.8004	4.15539e-07	4.31968e-05	7.31297	FBgn0025111	Ant2
-1.97713	8.65233	-16.7251	4.29093e-07	4.4093e-05	7.20128	FBgn0005640	Eip63E
3.02965	2.18762	16.6025	4.52259e-07	4.50658e-05	7.25479	FBgn0050026	CG30026
-2.23016	9.6294	-16.5974	4.5324e-07	4.50658e-05	7.15935	FBgn0015010	Ag5r
2.09906	3.9612	16.5952	4.53682e-07	4.50658e-05	7.14628	FBgn0003124	polo
1.64907	7.01235	16.5022	4.72245e-07	4.63942e-05	7.06327	FBgn0031294	IA-2
1.89039	6.86294	16.3789	4.98225e-07	4.82331e-05	7.00313	FBgn0036381	CG8745
-2.33574	2.36803	-16.3627	5.01754e-07	4.82331e-05	7.14541	FBgn0262524	ver
-2.06054	3.08528	-16.1513	5.50549e-07	5.18096e-05	7.00977	FBgn0039003	wfs1
2.12902	4.93748	16.0483	5.76239e-07	5.35011e-05	6.84697	FBgn0004842	RYa-R
-3.43117	3.11468	-16.0318	5.80493e-07	5.35011e-05	6.98358	FBgn0031277	CG13947
2.80809	1.9411	15.9784	5.94461e-07	5.42294e-05	6.98328	FBgn0264753	Rgk1
-2.70277	2.121	-15.9382	6.05238e-07	5.46549e-05	6.96483	FBgn0036186	CG6071
-1.50558	5.95378	-15.8598	6.26901e-07	5.55977e-05	6.74292	FBgn0030930	GalNAc-T2
-1.7389	8.24129	-15.8523	6.29015e-07	5.55977e-05	6.78459	FBgn0011638	La
1.64619	5.98755	15.8335	6.34336e-07	5.55977e-05	6.72763	FBgn0040250	Ugt86Dj
1.55827	7.44285	15.7314	6.6427e-07	5.74518e-05	6.70623	FBgn0015541	sda
2.51574	4.82336	15.7179	6.68343e-07	5.74518e-05	6.70024	FBgn0062412	Ctr1B
1.39495	5.66767	15.6025	7.04361e-07	5.93478e-05	6.60954	FBgn0263231	bel
1.58081	3.48072	15.5841	7.10315e-07	5.93478e-05	6.69178	FBgn0004595	pros
1.62794	4.28684	15.5437	7.23542e-07	5.95468e-05	6.61771	FBgn0038082	CG5724
-1.55236	5.83716	-15.5363	7.26017e-07	5.95468e-05	6.58422	FBgn0038455	CG14907
2.24019	2.46489	15.4599	7.51931e-07	6.06753e-05	6.71846	FBgn0026602	Ady43A
-1.64071	4.63687	-15.4558	7.53351e-07	6.06753e-05	6.56909	FBgn0036187	RIOK1
-1.76685	7.87044	-15.4024	7.72165e-07	6.11315e-05	6.55584	FBgn0266455	CG45080
-1.42716	4.68019	-15.4009	7.72691e-07	6.11315e-05	6.53498	FBgn0039182	CG5728
2.60517	3.37338	15.3756	7.81763e-07	6.13067e-05	6.62108	FBgn0000079	Amy-p
-1.71528	4.2816	-15.3565	7.8874e-07	6.1316e-05	6.53864	FBgn0026737	CG6171
-1.79334	4.42302	-15.2728	8.20006e-07	6.25267e-05	6.49139	FBgn0020388	Gcn5
-1.93252	3.06562	-15.2541	8.27185e-07	6.25267e-05	6.58105	FBgn0261266	zuc
-2.4237	2.3286	-15.211	8.4397e-07	6.25267e-05	6.6181	FBgn0024364	CG11417
-1.39659	4.64151	-15.195	8.50308e-07	6.25267e-05	6.43244	FBgn0031381	Npc2a
-1.52207	5.96206	-15.1942	8.50646e-07	6.25267e-05	6.41287	FBgn0263599	l(3)72Ab
1.91652	4.95677	15.1876	8.53272e-07	6.25267e-05	6.41821	FBgn0000463	Dl
-4.2027	-0.0774504	-15.1515	8.67847e-07	6.30777e-05	6.26303	FBgn0022359	Sodh-2
-1.54474	4.8312	-15.1027	8.87985e-07	6.35991e-05	6.38166	FBgn0029148	NHP2
-2.70739	2.10259	-15.0707	9.01448e-07	6.35991e-05	6.56442	FBgn0002887	mus201
-2.56515	2.31195	-15.0674	9.02846e-07	6.35991e-05	6.55224	FBgn0031022	CG12204
-2.55541	1.46402	-15.066	9.03478e-07	6.35991e-05	6.56529	FBgn0037531	CG10445
1.82137	5.05719	14.9726	9.44277e-07	6.59518e-05	6.30362	FBgn0250876	Sema-5c
-5.59096	-0.15018	-14.9529	9.53136e-07	6.60545e-05	5.97952	FBgn0034756	Cyp6d2
1.6914	5.59664	14.8469	1.00256e-06	6.89454e-05	6.22959	FBgn0015575	alpha-Est7
1.84728	6.02343	14.7731	1.03868e-06	7.08836e-05	6.19527	FBgn0036320	CG10943
-1.42044	5.67067	-14.7112	1.07009e-06	7.19244e-05	6.16165	FBgn0086370	sra
-1.89109	7.81925	-14.668	1.09268e-06	7.19244e-05	6.18014	FBgn0028583	lcs
1.32028	6.63244	14.6652	1.09414e-06	7.19244e-05	6.14727	FBgn0033079	Fmo-2
-1.33586	4.56738	-14.6508	1.10181e-06	7.19244e-05	6.15372	FBgn0263832	Rcd5
-1.73272	5.79531	-14.6454	1.10467e-06	7.19244e-05	6.13136	FBgn0260962	pic
-1.84737	3.06223	-14.6451	1.10484e-06	7.19244e-05	6.27336	FBgn0033122	CG17002
1.56355	6.92914	14.6351	1.11024e-06	7.19244e-05	6.13853	FBgn0004648	svr
1.8134	6.41665	14.5909	1.13429e-06	7.28007e-05	6.10514	FBgn0025456	CREG
-2.07828	2.62284	-14.5805	1.14005e-06	7.28007e-05	6.28123	FBgn0030855	CG5800
2.03287	1.88924	14.5511	1.15648e-06	7.3326e-05	6.30452	FBgn0010105	comm
-1.68531	4.81329	-14.5285	1.16929e-06	7.33957e-05	6.0876	FBgn0085440	CG34411
1.57774	7.09305	14.5103	1.17973e-06	7.33957e-05	6.07665	FBgn0034083	lbk
1.79176	6.93851	14.506	1.18221e-06	7.33957e-05	6.07089	FBgn0262624	Tmhs
-1.62371	3.20237	-14.4282	1.22821e-06	7.53735e-05	6.14303	FBgn0266420	Ote
-3.80375	0.482856	-14.4086	1.24008e-06	7.53735e-05	6.12973	FBgn0016034	mael
-1.55391	3.54152	-14.3799	1.25774e-06	7.53735e-05	6.08614	FBgn0039183	Dis3
-1.58397	4.50332	-14.3767	1.25972e-06	7.53735e-05	6.01779	FBgn0036035	CG18178
-3.6925	0.784169	-14.3712	1.26316e-06	7.53735e-05	6.16408	FBgn0034403	CG18190
-2.26058	2.41978	-14.3688	1.26466e-06	7.53735e-05	6.1918	FBgn0035476	CG12766
-1.90293	8.21958	-14.3425	1.28115e-06	7.58508e-05	6.0182	FBgn0002593	RpLP1
-1.67306	6.07154	-14.3271	1.29096e-06	7.59288e-05	5.9621	FBgn0264894	CG44085
2.018	4.40204	14.3115	1.30095e-06	7.60164e-05	5.98644	FBgn0031800	CG9497
1.81804	6.19788	14.2834	1.31924e-06	7.65246e-05	5.93727	FBgn0034247	CG6484
1.97502	4.53801	14.2719	1.32677e-06	7.65246e-05	5.95684	FBgn0051719	RluA-1
-1.45292	3.57053	-14.2072	1.37016e-06	7.82505e-05	5.98906	FBgn0036306	CG10973
1.84552	4.10889	14.189	1.38265e-06	7.82505e-05	5.93389	FBgn0038083	CG5999
1.2916	7.18695	14.1886	1.38295e-06	7.82505e-05	5.90636	FBgn0038197	foxo
-1.53703	4.0129	-14.0806	1.45984e-06	8.20814e-05	5.88686	FBgn0032906	RPA2
1.58162	7.59139	14.0333	1.49499e-06	8.35327e-05	5.83287	FBgn0029506	Tsp42Ee
1.73205	5.68731	13.9991	1.52105e-06	8.44606e-05	5.77636	FBgn0031732	CG11149
1.51474	3.07068	13.9795	1.53619e-06	8.47747e-05	5.90262	FBgn0051481	pb
2.11826	2.13949	13.9338	1.57221e-06	8.53e-05	5.97242	FBgn0040232	cmet
-4.09842	-0.235221	-13.9327	1.57308e-06	8.53e-05	5.75125	FBgn0032136	Apoltp
1.56423	3.67442	13.9311	1.57433e-06	8.53e-05	5.82118	FBgn0263354	CG42784
1.5672	5.75056	13.9104	1.59103e-06	8.53491e-05	5.72568	FBgn0052368	CG32368
-1.44584	4.49891	-13.8946	1.60382e-06	8.53491e-05	5.75223	FBgn0010220	Dbp45A
1.96489	2.33382	13.8946	1.60388e-06	8.53491e-05	5.93319	FBgn0036742	CG7497
-1.62023	4.0214	-13.852	1.63907e-06	8.60943e-05	5.76344	FBgn0021995	Rs1
1.46133	4.51389	13.8486	1.64193e-06	8.60943e-05	5.7149	FBgn0031306	CG4577
1.42371	4.68471	13.8428	1.64677e-06	8.60943e-05	5.70314	FBgn0015777	nrv2
-1.30683	6.87528	-13.8187	1.66721e-06	8.66559e-05	5.6956	FBgn0001978	stc
1.40649	6.5251	13.8021	1.68142e-06	8.68898e-05	5.67746	FBgn0261862	whd
-1.25424	4.70467	-13.7775	1.70276e-06	8.71881e-05	5.67276	FBgn0028744	CG5033
1.71315	2.62985	13.773	1.7067e-06	8.71881e-05	5.83644	FBgn0031939	CG13796
-1.41058	4.29062	-13.7056	1.76688e-06	8.97495e-05	5.65775	FBgn0020653	Trxr-1
-2.43955	4.69751	-13.6811	1.78939e-06	8.97667e-05	5.65286	FBgn0052751	CG32751
1.71742	2.53677	13.6734	1.79654e-06	8.97667e-05	5.79096	FBgn0003525	stg
-1.32297	4.52007	-13.6435	1.82456e-06	9.01194e-05	5.60762	FBgn0034232	CG4866
1.19331	5.74064	13.627	1.84022e-06	9.03935e-05	5.56355	FBgn0040252	Ugt86Dh
1.59664	3.71272	13.5981	1.86804e-06	9.12582e-05	5.63357	FBgn0031533	CG2772
-1.20201	4.98467	-13.5831	1.88257e-06	9.14684e-05	5.55235	FBgn0086690	cp309
-2.00652	1.8843	-13.5486	1.91675e-06	9.25469e-05	5.79267	FBgn0260985	RfC4
-1.47633	3.09642	-13.5263	1.93918e-06	9.25469e-05	5.66112	FBgn0037489	CG1234
2.11519	1.5451	13.5253	1.94016e-06	9.25469e-05	5.79431	FBgn0000140	asp
-3.64272	0.0992834	-13.5125	1.95319e-06	9.25469e-05	5.67477	FBgn0031564	CG2816
1.29123	6.22301	13.5092	1.95653e-06	9.25469e-05	5.50509	FBgn0032433	Oatp33Ea
1.49585	4.74649	13.4896	1.97673e-06	9.29891e-05	5.50291	FBgn0264707	RhoGEF3
2.18422	6.05475	13.4745	1.99245e-06	9.29891e-05	5.48891	FBgn0051104	CG31104
-2.01244	1.97062	-13.47	1.99708e-06	9.29891e-05	5.74415	FBgn0054034	CG34034
-1.30673	3.86258	-13.4595	2.0081e-06	9.30175e-05	5.54735	FBgn0004463	RpIII128
-2.25378	2.18938	-13.4469	2.02148e-06	9.3155e-05	5.72042	FBgn0040729	CG15126
-1.31066	5.00309	-13.3783	2.0957e-06	9.54329e-05	5.43696	FBgn0030151	CG1354
2.03376	4.23931	13.3684	2.10666e-06	9.54329e-05	5.47332	FBgn0004431	LysX
1.30567	6.74751	13.3622	2.11362e-06	9.54329e-05	5.43289	FBgn0262475	bru-2
3.1164	1.28055	13.3073	2.1759e-06	9.77513e-05	5.69664	FBgn0261262	CG42613
-1.62532	4.01192	-13.2426	2.25201e-06	9.92201e-05	5.4198	FBgn0038746	Surf6
-1.49705	4.86778	-13.2417	2.25306e-06	9.92201e-05	5.36663	FBgn0039868	CG11563
2.06135	1.86058	13.2333	2.26315e-06	9.92201e-05	5.61367	FBgn0034143	CG8303
1.31224	6.9625	13.2228	2.27586e-06	9.92201e-05	5.35768	FBgn0033246	ACC
-1.54234	4.15929	-13.2165	2.28353e-06	9.92201e-05	5.39122	FBgn0053965	CG33965
-1.36603	3.64973	-13.2125	2.28841e-06	9.92201e-05	5.42613	FBgn0037087	CG7519
2.10972	1.57859	13.2115	2.28964e-06	9.92201e-05	5.62246	FBgn0042110	CG18765
1.68032	7.61142	13.2051	2.29738e-06	9.92201e-05	5.36608	FBgn0003716	tkv
-1.84706	4.22657	-13.1803	2.32806e-06	9.95905e-05	5.37493	FBgn0086912	mbm
1.44639	4.97508	13.163	2.3497e-06	9.99141e-05	5.30535	FBgn0051300	CG31300
2.26182	3.11999	13.1563	2.35815e-06	9.99141e-05	5.45651	FBgn0037714	CG9396
-3.50522	0.315377	-13.1224	2.40148e-06	0.00010127	5.5295	FBgn0001112	Gld
-1.31977	4.87773	-13.0957	2.4362e-06	0.000102079	5.27671	FBgn0033754	Ak6
-1.2951	3.70446	-13.0694	2.47088e-06	0.000102743	5.33599	FBgn0037901	CG6744
1.50853	7.31857	13.012	2.54864e-06	0.000104878	5.24408	FBgn0014009	Rab2
-4.5824	1.71617	-13.0043	2.55924e-06	0.000104878	5.5348	FBgn0034636	CG10440
2.61683	0.826715	13.0026	2.56164e-06	0.000104878	5.53465	FBgn0051313	CG31313
-2.72739	2.7431	-12.9898	2.57955e-06	0.000104878	5.43025	FBgn0010039	GstD3
1.18896	4.43146	12.9888	2.58089e-06	0.000104878	5.22097	FBgn0259685	crb
-1.39785	3.43292	-12.9595	2.62228e-06	0.000105605	5.30044	FBgn0039525	CG5646
1.20127	5.63919	12.9584	2.62378e-06	0.000105605	5.17451	FBgn0002932	neur
1.50032	7.32667	12.9255	2.67112e-06	0.000105605	5.19303	FBgn0027571	CG3523
1.21809	4.6354	12.9253	2.67143e-06	0.000105605	5.1732	FBgn0031571	CG3921
-1.52247	3.48152	-12.9151	2.68633e-06	0.000105605	5.27307	FBgn0029672	CG2875
1.5286	7.12341	12.9143	2.68748e-06	0.000105605	5.18057	FBgn0031645	CG3036
1.12987	5.92549	12.9011	2.70698e-06	0.000105605	5.14316	FBgn0002569	Mal-A2
-1.66823	3.58933	-12.8928	2.71919e-06	0.000105605	5.25369	FBgn0053505	U3-55K
-1.27292	6.15744	-12.8909	2.72198e-06	0.000105605	5.14515	FBgn0030321	CG1703
1.27619	6.97003	12.8885	2.72561e-06	0.000105605	5.16078	FBgn0041094	scyl
-1.37117	3.22295	-12.8798	2.73853e-06	0.000105605	5.27435	FBgn0039829	CG15561
1.36287	5.03855	12.8708	2.75204e-06	0.000105605	5.12898	FBgn0086613	Ino80
-1.30011	3.56096	-12.8675	2.75713e-06	0.000105605	5.23095	FBgn0027378	MRG15
1.78824	4.34406	12.8608	2.76718e-06	0.000105605	5.16271	FBgn0002673	twe
2.11427	1.18695	12.855	2.77597e-06	0.000105605	5.44686	FBgn0031417	CG3597
-2.06307	1.41457	-12.793	2.87205e-06	0.000108671	5.40744	FBgn0036279	Ncc69
-1.1388	4.93747	-12.7874	2.88087e-06	0.000108671	5.08717	FBgn0015714	Cyp6a17
1.3746	9.4487	12.7771	2.89727e-06	0.00010883	5.1642	FBgn0010078	RpL23
-1.17399	6.09069	-12.769	2.91021e-06	0.000108859	5.07013	FBgn0004926	eIF-2beta
-1.44175	3.01894	-12.757	2.92947e-06	0.000109123	5.22521	FBgn0039205	CG13623
-1.55421	2.53608	-12.7324	2.9695e-06	0.000109784	5.26491	FBgn0031764	CG9107
1.53532	3.75021	12.7241	2.98312e-06	0.000109784	5.12064	FBgn0262366	CG43064
1.10447	4.87802	12.7235	2.98407e-06	0.000109784	5.0407	FBgn0052407	CG32407
1.70612	1.9558	12.7082	3.00949e-06	0.000110266	5.30092	FBgn0004106	Cdk1
-1.16581	4.90209	-12.692	3.03664e-06	0.000110806	5.03116	FBgn0011703	RnrL
-2.33509	1.59753	-12.6772	3.0615e-06	0.000111206	5.33639	FBgn0034879	Rrp4
1.10422	5.86948	12.6634	3.08514e-06	0.000111206	4.99872	FBgn0032330	Samuel
-1.12194	6.67328	-12.6628	3.0862e-06	0.000111206	5.0176	FBgn0037930	CG14715
1.52861	2.78309	12.6443	3.11807e-06	0.000111206	5.17368	FBgn0036485	FucTA
1.23527	8.48413	12.6437	3.11909e-06	0.000111206	5.0573	FBgn0016693	Past1
2.28098	0.955155	12.6367	3.1312e-06	0.000111206	5.33436	FBgn0259736	CG42390
-1.14158	4.85763	-12.6347	3.13466e-06	0.000111206	4.99731	FBgn0260747	CG5010
1.24144	6.06286	12.6092	3.17945e-06	0.000112349	4.96987	FBgn0033134	Tsp42El
-1.13327	4.69244	-12.5813	3.22941e-06	0.000113665	4.97115	FBgn0037543	CG10903
5.32924	-0.762452	12.5387	3.30721e-06	0.000115947	4.95294	FBgn0030437	hec
2.20791	1.74401	12.5256	3.33156e-06	0.000116344	5.22376	FBgn0032683	kon
-1.32402	6.52955	-12.5087	3.36327e-06	0.000116995	4.92072	FBgn0032050	CG13096
-1.21923	7.49078	-12.4821	3.41383e-06	0.000118293	4.92996	FBgn0260942	bond
1.2224	7.04213	12.4671	3.4428e-06	0.000118836	4.90708	FBgn0027594	drpr
1.21601	5.57884	12.4071	3.56142e-06	0.000122069	4.839	FBgn0085265	CG34236
-1.45326	4.37021	-12.4059	3.56375e-06	0.000122069	4.88894	FBgn0032925	CG9246
1.14461	7.11506	12.3971	3.58165e-06	0.000122214	4.86587	FBgn0035625	Blimp-1
1.23179	6.57366	12.3819	3.61255e-06	0.00012273	4.84168	FBgn0031897	CG13784
1.12662	4.91308	12.3718	3.63324e-06	0.00012273	4.8239	FBgn0042104	CG18747
-1.47032	5.09657	-12.3695	3.63798e-06	0.00012273	4.83404	FBgn0010770	ppan
1.40916	7.33212	12.3542	3.6696e-06	0.000123332	4.84573	FBgn0023458	Rbcn-3A
2.4425	1.0247	12.3182	3.74552e-06	0.000125412	5.15364	FBgn0031861	CG17375
2.32765	1.29704	12.2989	3.78707e-06	0.000125957	5.12774	FBgn0030348	CG10352
1.3007	8.86395	12.2866	3.81367e-06	0.000125957	4.84918	FBgn0004167	kst
-1.22668	4.7824	-12.2866	3.81369e-06	0.000125957	4.78722	FBgn0027836	Dgp-1
1.97869	2.57115	12.2845	3.81816e-06	0.000125957	4.99052	FBgn0034784	CG9826
-2.6615	1.48127	-12.269	3.85204e-06	0.000126607	5.11471	FBgn0259683	Ir40a
-1.19998	4.26423	-12.2546	3.88408e-06	0.000127193	4.79489	FBgn0036188	CG7339
1.06544	5.82598	12.2459	3.90345e-06	0.000127361	4.73952	FBgn0013995	Calx
1.18028	6.27885	12.234	3.93008e-06	0.000127763	4.74177	FBgn0011704	RnrS
1.09345	5.06111	12.222	3.95716e-06	0.000128099	4.72595	FBgn0030048	CG12112
-1.46818	4.85152	-12.2168	3.96905e-06	0.000128099	4.74668	FBgn0030749	AnxB11
-1.61052	2.41586	-12.2083	3.9883e-06	0.000128257	4.96489	FBgn0036036	CG14174
1.5073	6.0008	12.1984	4.01113e-06	0.000128529	4.71541	FBgn0051092	LpR2
-1.83502	1.67746	-12.1914	4.02727e-06	0.000128585	5.03523	FBgn0039459	IntS12
-2.23152	1.57521	-12.1798	4.05415e-06	0.000128654	5.0467	FBgn0030067	Rbm13
1.0927	6.5861	12.1781	4.0582e-06	0.000128654	4.71404	FBgn0051522	CG31522
-1.68728	2.60162	-12.1529	4.11757e-06	0.000128954	4.91258	FBgn0263076	Klp54D
-1.16091	4.50553	-12.1473	4.13084e-06	0.000128954	4.71142	FBgn0052549	CG32549
1.41589	5.36002	12.1425	4.14222e-06	0.000128954	4.67605	FBgn0051998	CG31998
2.73229	3.88499	12.1384	4.15194e-06	0.000128954	4.78635	FBgn0031945	CG7191
-1.40306	4.06841	-12.1351	4.15997e-06	0.000128954	4.73984	FBgn0029915	CG14434
-1.38623	2.81381	-12.1298	4.17278e-06	0.000128954	4.8657	FBgn0040778	CG17977
1.06877	5.95245	12.1243	4.18596e-06	0.000128954	4.66476	FBgn0032387	CG16965
-1.78344	1.8455	-12.1208	4.19452e-06	0.000128954	4.97543	FBgn0015351	CG14906
-1.23072	4.17645	-12.1195	4.19749e-06	0.000128954	4.71697	FBgn0037504	CG1142
-1.54537	2.26326	-12.1032	4.23743e-06	0.00012947	4.91519	FBgn0260450	CalpC
1.53007	6.62947	12.1008	4.24324e-06	0.00012947	4.66714	FBgn0033978	Cyp6a23
1.36226	3.77712	12.0904	4.26877e-06	0.000129805	4.72388	FBgn0033739	Dyb
-1.65121	2.32759	-12.0789	4.29749e-06	0.000130236	4.89603	FBgn0032487	Ski6
-1.13996	4.62227	-12.0716	4.31554e-06	0.000130341	4.65666	FBgn0040388	boi
-1.46046	3.35583	-12.0475	4.3763e-06	0.000131731	4.75528	FBgn0003275	RpII18
-1.2231	7.59274	-12.031	4.41847e-06	0.000132554	4.65068	FBgn0261793	Trf2
-1.4411	3.42034	-12.0237	4.43724e-06	0.000132672	4.73268	FBgn0026263	bip1
1.22132	6.49766	12.0016	4.49481e-06	0.000133945	4.59983	FBgn0037146	CG7470
2.15076	6.30349	11.9838	4.54171e-06	0.000134893	4.58858	FBgn0035355	CG16985
-1.46425	4.32779	-11.9676	4.58491e-06	0.000135352	4.61622	FBgn0004556	Dbp73D
-1.32301	6.75723	-11.9667	4.58742e-06	0.000135352	4.58543	FBgn0028473	Non1
-1.18922	5.35832	-11.9404	4.65847e-06	0.000136996	4.55106	FBgn0033379	Mys45A
1.99008	2.10177	11.9348	4.67379e-06	0.000136996	4.82703	FBgn0261089	Sytalpha
-2.35898	0.735043	-11.9177	4.72077e-06	0.000137564	4.93083	FBgn0261871	dpr2
1.10185	4.82643	11.9131	4.73353e-06	0.000137564	4.53581	FBgn0000256	capu
-1.18646	4.88166	-11.911	4.73936e-06	0.000137564	4.54387	FBgn0037121	Rpb8
1.11209	5.92885	11.8849	4.81267e-06	0.000138798	4.51118	FBgn0265186	CG44251
1.43596	7.65798	11.8806	4.8248e-06	0.000138798	4.55574	FBgn0033212	CG1399
1.2944	6.91344	11.8794	4.82843e-06	0.000138798	4.53241	FBgn0026718	fu12
1.20696	5.3229	11.87	4.85521e-06	0.00013912	4.49882	FBgn0033215	CG1942
-1.27181	4.10986	-11.8639	4.87246e-06	0.000139169	4.55985	FBgn0038989	CG6937
3.17246	-0.483089	11.8497	4.91357e-06	0.000139896	4.81516	FBgn0085480	CG34451
-1.05441	5.21881	-11.8282	4.97625e-06	0.000140784	4.47816	FBgn0005411	U2af50
-1.21668	5.07876	-11.8051	5.04466e-06	0.000142269	4.46966	FBgn0033059	CG7845
-1.2557	3.98021	-11.7996	5.06106e-06	0.000142276	4.52864	FBgn0003062	Fib
-1.05259	6.41073	-11.7944	5.07675e-06	0.000142276	4.46492	FBgn0038473	Ns1
-1.40004	3.57885	-11.7886	5.09426e-06	0.000142321	4.56433	FBgn0036754	CG5589
-1.26997	4.1687	-11.7778	5.12687e-06	0.000142786	4.4995	FBgn0026319	Traf4
-4.73781	0.2522	-11.7699	5.15115e-06	0.000143016	4.77061	FBgn0015399	kek1
1.23113	6.67581	11.7525	5.20444e-06	0.000144049	4.44338	FBgn0036316	CG10960
-1.35367	2.83299	-11.7335	5.26378e-06	0.000144685	4.61209	FBgn0038235	CG8461
-1.44636	2.66236	-11.73	5.27475e-06	0.000144685	4.63273	FBgn0002577	m
2.63205	0.614388	11.7194	5.30814e-06	0.000144685	4.8149	FBgn0035260	CG7991
-1.54863	2.51085	-11.7171	5.31525e-06	0.000144685	4.64523	FBgn0034214	CG6550
-3.55708	-0.467934	-11.7148	5.32267e-06	0.000144685	4.70574	FBgn0004516	Gad1
-1.32725	4.36457	-11.7142	5.32452e-06	0.000144685	4.44579	FBgn0051202	CG31202
-1.84173	1.53409	-11.6966	5.38058e-06	0.000145385	4.74656	FBgn0050414	CG30414
1.18276	6.51163	11.6913	5.39779e-06	0.000145385	4.39887	FBgn0028572	qtc
1.48486	8.4051	11.6909	5.39909e-06	0.000145385	4.45558	FBgn0263120	Acsl
-1.32488	2.83508	-11.6729	5.45723e-06	0.00014651	4.57203	FBgn0036301	CG4069
-1.42065	2.66829	-11.6556	5.51413e-06	0.000147594	4.5835	FBgn0031068	Alr
-1.84793	9.85108	-11.6464	5.54468e-06	0.000147968	4.46535	FBgn0031176	CG1678
-1.22381	4.11177	-11.637	5.57593e-06	0.00014836	4.4107	FBgn0037973	CG18547
-1.24099	4.58232	-11.6165	5.64507e-06	0.000149754	4.36637	FBgn0083068	CG33947
-1.24148	5.34728	-11.5927	5.72616e-06	0.000151455	4.32506	FBgn0013765	cnn
1.16194	4.28964	11.5836	5.75756e-06	0.000151837	4.35	FBgn0033635	CG7777
1.28039	4.08241	11.5491	5.87865e-06	0.000154574	4.3449	FBgn0051102	CG31102
-1.24115	3.77521	-11.5308	5.94416e-06	0.000155392	4.37131	FBgn0039627	CG11837
1.59801	2.81269	11.5307	5.94451e-06	0.000155392	4.47633	FBgn0052183	Ccn
1.18554	4.64082	11.5169	5.99442e-06	0.000156239	4.28536	FBgn0052107	CG32107
1.01016	5.29443	11.5043	6.04002e-06	0.00015697	4.25616	FBgn0040765	luna
-1.9365	2.97333	-11.4963	6.06965e-06	0.000157283	4.46024	FBgn0035986	CG4022
-1.31096	3.28079	-11.4861	6.10705e-06	0.000157795	4.39694	FBgn0034118	Nup62
1.14526	9.65951	11.4518	6.23592e-06	0.000160511	4.33453	FBgn0030040	CG15347
1.2959	6.23085	11.4484	6.24861e-06	0.000160511	4.23115	FBgn0036993	CG5910
1.40981	4.61861	11.4439	6.26602e-06	0.000160511	4.24182	FBgn0030484	GstT4
1.73938	4.62233	11.4282	6.32586e-06	0.000160904	4.23914	FBgn0036152	CG6175
1.03674	4.69604	11.4262	6.33393e-06	0.000160904	4.21954	FBgn0263979	Caf1
-1.53619	3.32906	-11.4258	6.33539e-06	0.000160904	4.35843	FBgn0038146	CG9799
-1.67994	1.82887	-11.4023	6.42689e-06	0.000162605	4.52475	FBgn0035336	CG9004
1.75123	1.7178	11.3985	6.44166e-06	0.000162605	4.52358	FBgn0037635	CG9837
-1.07213	7.42721	-11.3932	6.46258e-06	0.000162605	4.22793	FBgn0039857	RpL6
-2.0986	1.36569	-11.39	6.47511e-06	0.000162605	4.5757	FBgn0001150	gt
-1.32891	3.03862	-11.3752	6.53403e-06	0.000162819	4.35265	FBgn0262560	wcd
3.29191	-0.78042	11.3712	6.55012e-06	0.000162819	4.51188	FBgn0000071	Ama
-1.61886	3.00183	-11.3697	6.5563e-06	0.000162819	4.36229	FBgn0266268	FeCH
-1.34564	3.32839	-11.3666	6.56873e-06	0.000162819	4.31317	FBgn0263316	Mrp4
1.06985	5.66868	11.3651	6.5747e-06	0.000162819	4.16384	FBgn0050344	CG30344
-1.38757	2.63623	-11.3559	6.61194e-06	0.000163289	4.39065	FBgn0039828	CG1542
-1.65261	3.08564	-11.3292	6.72121e-06	0.000165531	4.32657	FBgn0035393	CG16753
1.08707	3.84063	11.3216	6.75251e-06	0.000165845	4.21114	FBgn0261547	Exn
-2.30111	10.5964	-11.3101	6.80058e-06	0.000166484	4.25938	FBgn0032505	CG16826
1.82971	1.90971	11.3064	6.81577e-06	0.000166484	4.4439	FBgn0034741	CG4269
-1.16618	5.4907	-11.2962	6.85884e-06	0.000167079	4.12355	FBgn0034528	CG11180
1.33723	3.73593	11.2769	6.9408e-06	0.000168616	4.1958	FBgn0037448	CG15186
-1.40897	3.3279	-11.2696	6.97247e-06	0.000168908	4.25002	FBgn0053107	CG33107
1.79132	2.44365	11.2614	7.00758e-06	0.000168908	4.34893	FBgn0032900	CG14401
1.1141	6.98104	11.261	7.00948e-06	0.000168908	4.12456	FBgn0035542	DOR
1.52432	2.82252	11.2498	7.05812e-06	0.000169623	4.28716	FBgn0050089	CG30089
-1.67056	4.52363	-11.2395	7.10309e-06	0.000170246	4.12983	FBgn0039431	plum
-1.04248	4.39369	-11.2299	7.14536e-06	0.000170772	4.11345	FBgn0010762	simj
-1.09213	3.93784	-11.2259	7.16324e-06	0.000170772	4.14751	FBgn0031851	Aatf
-1.43188	2.58717	-11.2116	7.22716e-06	0.000171837	4.30203	FBgn0086451	l(2)k09022
1.05214	4.54462	11.2036	7.26285e-06	0.000172228	4.07681	FBgn0259923	2020-09-04
-1.96931	2.4444	-11.193	7.31111e-06	0.000172914	4.32448	FBgn0032017	CG7810
-1.47694	2.60593	-11.183	7.35646e-06	0.000173527	4.28187	FBgn0035714	CG8549
-1.65974	1.99942	-11.1676	7.42743e-06	0.000173934	4.35093	FBgn0039404	CG14543
2.22784	3.78338	11.1638	7.44471e-06	0.000173934	4.13904	FBgn0026439	Eaat1
1.14248	5.54621	11.1624	7.45153e-06	0.000173934	4.02554	FBgn0003041	pbl
1.33107	6.0858	11.1562	7.48025e-06	0.00017415	4.02982	FBgn0026619	Taz
-1.3003	3.52938	-11.1358	7.57607e-06	0.000175634	4.13345	FBgn0038183	CG9286
-1.14443	4.78348	-11.1342	7.58329e-06	0.000175634	4.02967	FBgn0041087	wun2
1.56402	2.18884	11.1151	7.67471e-06	0.000176674	4.27774	FBgn0005586	Rab3
-1.04892	4.39345	-11.1115	7.69198e-06	0.000176674	4.03254	FBgn0010339	128up
-1.29108	7.39088	-11.1091	7.70321e-06	0.000176674	4.03396	FBgn0063494	GstE6
2.01575	1.89244	11.1083	7.70725e-06	0.000176674	4.32033	FBgn0027500	spd-2
-1.18723	7.8388	-11.0873	7.80911e-06	0.000177849	4.03339	FBgn0025866	CalpB
1.1485	4.07521	11.0864	7.81342e-06	0.000177849	4.03073	FBgn0033139	Tsp42Er
1.03646	5.85112	11.0809	7.84046e-06	0.000177849	3.97178	FBgn0040299	Myo28B1
-0.99885	5.56549	-11.0791	7.84956e-06	0.000177849	3.97214	FBgn0015372	RabX1
1.57142	7.46342	11.0738	7.87558e-06	0.000177849	4.01166	FBgn0053265	Muc68E
-0.996272	4.42099	-11.0733	7.87786e-06	0.000177849	4.00326	FBgn0026566	CG1307
-1.25912	3.92293	-11.0467	8.01081e-06	0.000180043	4.03046	FBgn0051955	CG31955
1.16487	6.72808	11.0458	8.01535e-06	0.000180043	3.9695	FBgn0028515	EndoGI
1.10171	5.88568	11.0159	8.16731e-06	0.000182997	3.92768	FBgn0023537	CG17896
1.13382	6.68695	11.0074	8.21151e-06	0.000183527	3.94165	FBgn0039958	CG12567
0.953822	5.82375	10.9992	8.25378e-06	0.000183745	3.91426	FBgn0036039	Naa60
1.011	6.60235	10.9958	8.27144e-06	0.000183745	3.93104	FBgn0040364	CG11378
1.16555	5.83849	10.9893	8.30569e-06	0.000183745	3.90876	FBgn0030574	CG9413
2.34364	1.03146	10.9824	8.34178e-06	0.000183745	4.33536	FBgn0034507	CG11192
-0.968798	5.9063	-10.9803	8.35296e-06	0.000183745	3.90589	FBgn0015393	hoip
-1.14861	3.44465	-10.9749	8.38139e-06	0.000183745	4.02832	FBgn0086447	l(2)37Cg
1.07418	6.24543	10.9703	8.40609e-06	0.000183745	3.90371	FBgn0015791	Rab14
-1.4585	2.56501	-10.9691	8.41209e-06	0.000183745	4.14174	FBgn0014022	Rlb1
2.32573	0.25664	10.9686	8.41469e-06	0.000183745	4.36046	FBgn0004872	piwi
-1.02043	4.18231	-10.9626	8.44703e-06	0.000183745	3.94402	FBgn0003076	Pgm
-2.90347	0.299574	-10.9625	8.44735e-06	0.000183745	4.35567	FBgn0051279	CG31279
1.49139	4.33593	10.953	8.49816e-06	0.000184402	3.92534	FBgn0031860	CG11236
-3.07821	-0.0821979	-10.9457	8.53753e-06	0.000184807	4.3292	FBgn0038967	CG13847
-0.950199	6.16446	-10.9218	8.66845e-06	0.000187188	3.86965	FBgn0038613	Vha100-4
-1.06074	3.85374	-10.9114	8.7258e-06	0.000187932	3.93803	FBgn0260940	lsn
1.73311	1.52544	10.9079	8.74495e-06	0.000187932	4.22217	FBgn0259927	CG42450
1.47963	7.34293	10.8998	8.79025e-06	0.000188453	3.88675	FBgn0259834	out
-1.29309	5.37174	-10.891	8.83957e-06	0.000189057	3.84713	FBgn0051997	CG31997
2.29073	0.859614	10.8759	8.92528e-06	0.000190434	4.27685	FBgn0003892	ptc
-0.978997	5.88657	-10.8588	9.02269e-06	0.000191821	3.82058	FBgn0037632	Tcp-1eta
1.62404	3.75619	10.8556	9.04141e-06	0.000191821	3.91055	FBgn0035578	CG13707
-2.34661	1.30446	-10.8517	9.06392e-06	0.000191821	4.23893	FBgn0037717	CG8301
1.25473	4.56919	10.8496	9.07609e-06	0.000191821	3.83326	FBgn0028540	CG9008
-1.04071	5.54602	-10.838	9.14383e-06	0.000192797	3.80438	FBgn0262954	Rpb12
-1.22841	7.26943	-10.8339	9.16768e-06	0.000192845	3.83833	FBgn0010113	hdc
-1.97632	3.58121	-10.8295	9.19332e-06	0.00019293	3.93974	FBgn0033271	CG8708
-1.76838	3.59955	-10.8196	9.25153e-06	0.000193697	3.92287	FBgn0032393	CG12264
1.11484	4.35542	10.8018	9.35789e-06	0.000194892	3.81032	FBgn0036336	ste14
1.95154	1.10456	10.7984	9.37848e-06	0.000194892	4.19895	FBgn0036544	sff
-1.19633	3.3685	-10.7966	9.38926e-06	0.000194892	3.91419	FBgn0033548	CG7637
0.980733	5.20973	10.7955	9.39582e-06	0.000194892	3.76947	FBgn0013984	InR
1.07677	4.54544	10.772	9.53862e-06	0.000197396	3.7767	FBgn0263351	AP-2mu
1.00986	5.45491	10.7539	9.65041e-06	0.000199186	3.73879	FBgn0016078	wun
0.978469	5.57436	10.7508	9.66964e-06	0.000199186	3.73686	FBgn0003256	rl
1.32882	3.86949	10.7297	9.80192e-06	0.000201446	3.8034	FBgn0259734	CG42388
-0.995542	4.68025	-10.7261	9.82457e-06	0.000201449	3.74539	FBgn0039747	AdoR
0.97582	6.84559	10.7207	9.85892e-06	0.00020169	3.74469	FBgn0030056	CG11284
-1.01844	4.00461	-10.7014	9.98292e-06	0.000203761	3.77503	FBgn0036847	CG11577
-1.57166	2.01862	-10.6919	1.00443e-05	0.000204107	4.02385	FBgn0039488	CG6066
-1.59583	3.26071	-10.6777	1.01371e-05	0.00020416	3.85607	FBgn0260484	HIP
-3.01994	1.3057	-10.6771	1.0141e-05	0.00020416	4.14232	FBgn0037992	CG4702
-1.53828	2.55477	-10.6747	1.01567e-05	0.00020416	3.94186	FBgn0038951	CG5380
-2.62723	0.0137299	-10.6734	1.01656e-05	0.00020416	4.17166	FBgn0036777	CG7341
-1.02123	4.53779	-10.6733	1.01664e-05	0.00020416	3.71585	FBgn0032597	CG17904
-1.25434	3.47722	-10.6704	1.01852e-05	0.00020416	3.81423	FBgn0037815	Rrp46
-2.22106	2.82156	-10.6654	1.02185e-05	0.000204369	3.9265	FBgn0027570	Nep2
-1.4462	2.27253	-10.6523	1.03057e-05	0.000205654	3.95992	FBgn0000246	c(3)G
2.49394	0.106106	10.6441	1.03607e-05	0.000205958	4.15597	FBgn0010109	dpn
0.922805	5.34286	10.6405	1.03849e-05	0.000205958	3.65723	FBgn0015589	Apc
-1.05511	7.38091	-10.6376	1.04045e-05	0.000205958	3.70238	FBgn0259937	Nop60B
-1.59106	6.13776	-10.6363	1.04131e-05	0.000205958	3.67179	FBgn0000592	Est-6
0.929331	5.16265	10.6281	1.04688e-05	0.000206602	3.65011	FBgn0031530	pgant2
1.12025	6.1045	10.6009	1.06558e-05	0.000209831	3.63872	FBgn0015039	Cyp9b2
-1.22119	3.35869	-10.593	1.07111e-05	0.000210455	3.77202	FBgn0260755	CG42553
-0.997742	7.57865	-10.5765	1.08274e-05	0.000212275	3.66492	FBgn0002031	l(2)37Cc
-1.81341	6.15236	-10.549	1.10238e-05	0.000215364	3.6115	FBgn0050371	CG30371
1.28047	3.46359	10.5456	1.10485e-05	0.000215364	3.71461	FBgn0005670	Cyp4d1
-1.14568	4.89228	-10.5443	1.10573e-05	0.000215364	3.6094	FBgn0031657	CG3756
1.09124	5.95813	10.5321	1.11462e-05	0.000216154	3.58561	FBgn0035049	Mmp1
-1.27483	7.31381	-10.5155	1.12685e-05	0.000217291	3.61252	FBgn0038964	Nop56
-1.31189	3.30991	-10.5133	1.12847e-05	0.000217291	3.72355	FBgn0038275	CG3817
1.20662	3.96098	10.511	1.13021e-05	0.000217291	3.6359	FBgn0034724	babos
-1.50397	4.41226	-10.5014	1.13732e-05	0.00021819	3.61347	FBgn0019938	RpI1
-1.64615	2.23826	-10.492	1.14439e-05	0.000219077	3.85768	FBgn0034496	CG9143
0.90406	5.50868	10.4867	1.14839e-05	0.000219372	3.54594	FBgn0034644	CG10082
-1.6264	2.10812	-10.4824	1.15165e-05	0.000219526	3.86731	FBgn0034523	Nnf1a
-1.43206	2.11363	-10.4608	1.16813e-05	0.000221618	3.84538	FBgn0030506	Lig4
0.940148	5.61324	10.4559	1.17196e-05	0.000221618	3.52446	FBgn0024187	syd
-0.941216	6.60908	-10.4534	1.17391e-05	0.000221618	3.5459	FBgn0259152	Clbn
1.19943	7.10589	10.4522	1.17483e-05	0.000221618	3.55944	FBgn0031449	CG31689
-1.24366	2.97538	-10.4519	1.17502e-05	0.000221618	3.71958	FBgn0261286	Mat89Ba
0.983751	6.54594	10.4479	1.17812e-05	0.000221734	3.53919	FBgn0052039	CG32039
-0.93057	4.64756	-10.441	1.18353e-05	0.000222285	3.54021	FBgn0087039	Sbp2
-1.65533	2.40844	-10.426	1.19534e-05	0.000224032	3.78888	FBgn0037926	Elp1
-1.55115	1.98217	-10.4217	1.19874e-05	0.0002242	3.83831	FBgn0035035	CG3570
-2.01394	0.848284	-10.4119	1.20655e-05	0.000225188	3.97301	FBgn0028984	Spn88Ea
2.07323	1.50459	10.39	1.22422e-05	0.000228012	3.87854	FBgn0085426	Rgk3
1.26913	5.38285	10.3709	1.2398e-05	0.000230432	3.46513	FBgn0034141	CG8311
1.88452	4.63983	10.3513	1.25614e-05	0.000232986	3.48627	FBgn0032839	CG10659
1.02001	5.48386	10.3452	1.2612e-05	0.000233086	3.44314	FBgn0040271	Sulf1
1.06907	4.40924	10.3443	1.26198e-05	0.000233086	3.47615	FBgn0034085	Ptp52F
0.975619	5.5723	10.3397	1.2659e-05	0.000233086	3.4392	FBgn0053111	CG33111
1.64808	4.58485	10.338	1.2673e-05	0.000233086	3.47306	FBgn0005664	Cry
-2.2473	0.761554	-10.3351	1.26972e-05	0.000233086	3.93146	FBgn0025687	LKR
1.06091	5.03268	10.3303	1.27381e-05	0.000233358	3.43743	FBgn0031519	CG3326
-1.09436	4.43888	-10.317	1.28515e-05	0.00023482	3.46509	FBgn0030720	CG8939
1.36363	2.52645	10.3123	1.28919e-05	0.00023482	3.66882	FBgn0052372	ltl
1.59081	1.52336	10.3118	1.28967e-05	0.00023482	3.80745	FBgn0031542	CG15414
1.05476	5.34711	10.2929	1.30608e-05	0.000235368	3.40515	FBgn0085317	CG34288
1.10403	6.23073	10.2924	1.30651e-05	0.000235368	3.41664	FBgn0034709	Swim
-1.09105	3.99004	-10.2912	1.30753e-05	0.000235368	3.48122	FBgn0038585	Non3
-1.02291	6.37771	-10.2898	1.30875e-05	0.000235368	3.4202	FBgn0262732	mbf1
0.889138	5.43869	10.2893	1.30923e-05	0.000235368	3.40064	FBgn0030245	CG1637
1.52389	3.88235	10.2866	1.31159e-05	0.000235368	3.48632	FBgn0031461	daw
-1.56721	1.56143	-10.2852	1.31279e-05	0.000235368	3.79698	FBgn0259982	l(2)35Cc
-1.0382	7.43553	-10.2841	1.31374e-05	0.000235368	3.44711	FBgn0033221	CG12825
-1.16085	3.37729	-10.2612	1.33406e-05	0.000237135	3.52768	FBgn0038306	Art3
0.905604	6.28836	10.2587	1.33636e-05	0.000237135	3.39245	FBgn0036372	Abp1
-1.47076	2.14992	-10.2581	1.33687e-05	0.000237135	3.69667	FBgn0033507	CG12909
1.09291	5.31644	10.2456	1.34818e-05	0.000238405	3.37066	FBgn0001987	Gli
1.68989	2.53062	10.2443	1.34936e-05	0.000238405	3.62657	FBgn0034047	CG12970
0.966029	4.86633	10.2375	1.35549e-05	0.000239015	3.37217	FBgn0030600	hiw
0.980401	5.02951	10.2202	1.37142e-05	0.000241348	3.35474	FBgn0000119	arr
-1.1267	3.17336	-10.2163	1.375e-05	0.000241411	3.51896	FBgn0086251	del
-1.00541	3.97334	-10.214	1.37718e-05	0.000241411	3.42351	FBgn0035805	CG7506
0.928016	6.1846	10.2046	1.38586e-05	0.000242458	3.34956	FBgn0000562	egl
2.31788	2.10853	10.1901	1.39947e-05	0.000244361	3.66486	FBgn0039464	CG6330
0.966672	4.02005	10.1674	1.42118e-05	0.000247667	3.3742	FBgn0022986	qkr58E-1
1.36455	6.31564	10.1595	1.42879e-05	0.000248435	3.32105	FBgn0033236	CG14764
0.908805	4.76996	10.1571	1.43114e-05	0.000248435	3.31521	FBgn0000546	EcR
-0.937134	6.13728	-10.1519	1.43616e-05	0.000248822	3.31151	FBgn0021895	ytr
-1.27311	2.90575	-10.1469	1.44106e-05	0.000249189	3.50699	FBgn0053051	CG33051
-1.22813	3.88585	-10.143	1.44486e-05	0.000249282	3.38512	FBgn0040078	pont
-1.79429	1.09648	-10.1406	1.44718e-05	0.000249282	3.75636	FBgn0026702	l(1)G0045
0.997089	7.23928	10.1353	1.45241e-05	0.000249703	3.32967	FBgn0038924	CG6028
1.30989	7.67743	10.1295	1.45817e-05	0.000250212	3.33973	FBgn0037989	ATP8B
1.32386	4.18498	10.116	1.47153e-05	0.000251724	3.32783	FBgn0032029	CG17292
-1.61546	4.86579	-10.1118	1.47577e-05	0.000251724	3.30451	FBgn0020414	Idgf3
1.08429	5.47357	10.1087	1.47893e-05	0.000251724	3.26777	FBgn0262733	Src64B
-1.81944	1.21696	-10.1056	1.48199e-05	0.000251724	3.71883	FBgn0033459	CG12744
-1.15216	2.83916	-10.1047	1.48293e-05	0.000251724	3.48125	FBgn0037792	TAF1B
-1.06115	4.37578	-10.1038	1.48388e-05	0.000251724	3.30998	FBgn0034312	CG10916
-0.932829	4.11201	-10.0987	1.489e-05	0.000251926	3.32334	FBgn0028426	JhI-1
1.01551	6.78482	10.097	1.49071e-05	0.000251926	3.28652	FBgn0010350	CdsA
1.02732	5.29867	10.0888	1.49909e-05	0.000252418	3.25265	FBgn0051116	ClC-a
-1.47008	2.12399	-10.0884	1.49942e-05	0.000252418	3.57655	FBgn0030061	CG1785
-1.23313	3.57051	-10.0858	1.50208e-05	0.000252418	3.37689	FBgn0038482	CG4053
1.20817	3.49794	10.0788	1.50935e-05	0.000252865	3.36664	FBgn0013751	Awh
-1.36892	2.58662	-10.0777	1.5104e-05	0.000252865	3.50221	FBgn0033471	CG12134
1.4042	2.34708	10.0467	1.54275e-05	0.000257798	3.49976	FBgn0037174	CG14457
-1.11103	4.00852	-10.0212	1.56993e-05	0.000261495	3.27849	FBgn0037561	CG9630
-2.14952	0.325164	-10.0205	1.57073e-05	0.000261495	3.73695	FBgn0040001	CG17374
-1.45705	3.8089	-10.0171	1.57431e-05	0.000261605	3.30598	FBgn0038601	CG18600
-2.20693	0.303753	-9.99942	1.59356e-05	0.00026409	3.72392	FBgn0263143	vret
-1.68158	2.52577	-9.99795	1.59518e-05	0.00026409	3.46181	FBgn0038968	CG12499
2.46199	-0.265085	9.99323	1.60035e-05	0.000264457	3.72829	FBgn0033521	CG12896
1.13164	5.05935	9.97948	1.61555e-05	0.000266476	3.17516	FBgn0031814	retm
-1.68837	2.72212	-9.97273	1.62307e-05	0.000267224	3.41647	FBgn0037061	CG12975
0.974662	5.08562	9.96736	1.62908e-05	0.000267333	3.16299	FBgn0261393	alpha-Est5
0.887686	6.47182	9.9668	1.62971e-05	0.000267333	3.17835	FBgn0264357	SNF4Agamma
-1.45466	3.64173	-9.95191	1.64651e-05	0.000268823	3.27479	FBgn0036124	CG7839
-2.17624	1.39356	-9.95178	1.64666e-05	0.000268823	3.59942	FBgn0034540	Lrt
-1.48932	2.75028	-9.95077	1.64782e-05	0.000268823	3.38901	FBgn0029525	CG18273
-1.05451	3.9737	-9.94584	1.65342e-05	0.000268929	3.22329	FBgn0039328	CHKov2
-1.10172	3.81896	-9.94435	1.65513e-05	0.000268929	3.2387	FBgn0002733	E(spl)mbeta-HLH
-0.973184	5.18484	-9.94228	1.6575e-05	0.000268929	3.14976	FBgn0039241	CG11089
0.89278	6.63354	9.93053	1.67099e-05	0.000270628	3.15563	FBgn0052264	CG32264
0.850839	5.35568	9.92641	1.67575e-05	0.000270909	3.12748	FBgn0030685	Graf
-1.16525	2.6904	-9.91798	1.68555e-05	0.000272	3.36244	FBgn0028707	Mt2
1.02503	3.94001	9.91121	1.69347e-05	0.000272786	3.18954	FBgn0265002	CG44153
2.83544	2.13009	9.90748	1.69784e-05	0.000272999	3.4749	FBgn0010044	GstD8
-0.928148	4.14303	-9.90247	1.70374e-05	0.000273455	3.1721	FBgn0038016	MBD-R2
-0.923446	4.77282	-9.89726	1.70991e-05	0.000273953	3.12756	FBgn0037011	CG4858
1.40519	2.24903	9.88155	1.72863e-05	0.000276084	3.39054	FBgn0036354	Poc1
1.79013	1.28307	9.88092	1.72939e-05	0.000276084	3.53181	FBgn0260932	cuff
-2.0529	0.784517	-9.87449	1.73713e-05	0.000276826	3.60321	FBgn0042630	Sox21b
-1.00713	5.94534	-9.86609	1.74728e-05	0.000277948	3.09152	FBgn0031048	CG12237
1.02341	7.45499	9.85553	1.76016e-05	0.0002795	3.12444	FBgn0261671	tweek
-1.07102	6.7699	-9.85047	1.76637e-05	0.000279988	3.09935	FBgn0010551	Phb2
0.874399	5.946	9.8235	1.79987e-05	0.000284793	3.05462	FBgn0037843	CG4511
0.972022	6.27587	9.82094	1.80308e-05	0.000284798	3.06122	FBgn0085370	Pde11
-0.932433	4.67588	-9.80618	1.82175e-05	0.000286492	3.06243	FBgn0039302	Nup358
-1.60071	2.91193	-9.8042	1.82428e-05	0.000286492	3.25967	FBgn0053172	CG33172
0.934697	6.23059	9.80272	1.82616e-05	0.000286492	3.04578	FBgn0032694	MESR3
-1.18205	5.44436	-9.79605	1.8347e-05	0.000286492	3.03761	FBgn0034243	Ns2
0.995773	7.44235	9.79371	1.8377e-05	0.000286492	3.07642	FBgn0024273	WASp
-0.995471	7.79959	-9.79118	1.84095e-05	0.000286492	3.08709	FBgn0001233	Hsp83
-1.13498	3.07285	-9.79061	1.84169e-05	0.000286492	3.21257	FBgn0027079	Aats-val
2.62603	2.25817	9.79058	1.84173e-05	0.000286492	3.36096	FBgn0036713	Mip
-2.07622	0.637698	-9.78439	1.84972e-05	0.000286492	3.55087	FBgn0010040	GstD4
-1.56357	2.17044	-9.78408	1.85013e-05	0.000286492	3.34639	FBgn0031161	CG15445
1.50826	6.2444	9.78255	1.8521e-05	0.000286492	3.03323	FBgn0030929	CG15043
-1.82255	0.986134	-9.78243	1.85226e-05	0.000286492	3.51098	FBgn0023525	CG3191
0.933999	5.57197	9.77762	1.85851e-05	0.000286961	3.01415	FBgn0033453	CG1667
-1.38682	2.1432	-9.7686	1.87029e-05	0.000288282	3.33295	FBgn0036487	Prp31
3.1421	-0.71341	9.7541	1.8894e-05	0.000290523	3.5496	FBgn0033132	Tsp42Ej
-1.39495	2.6173	-9.75265	1.89132e-05	0.000290523	3.25425	FBgn0032512	CG9305
-1.20013	4.76147	-9.74339	1.90367e-05	0.00029133	3.01621	FBgn0036144	GlcAT-P
-1.2661	4.31007	-9.74156	1.90611e-05	0.00029133	3.04385	FBgn0039644	CG11897
-1.05783	3.87589	-9.73893	1.90964e-05	0.00029133	3.07424	FBgn0033540	Elp2
1.3484	2.0288	9.73628	1.9132e-05	0.00029133	3.31077	FBgn0030769	CG13012
-1.16385	9.34217	-9.73524	1.9146e-05	0.00029133	3.0941	FBgn0085241	CG34212
1.22858	6.50273	9.73178	1.91926e-05	0.00029133	2.99933	FBgn0038100	Paip2
0.971368	4.45102	9.73169	1.91939e-05	0.00029133	3.00871	FBgn0011710	2020-09-01
0.890707	5.70724	9.72357	1.93038e-05	0.000292501	2.97319	FBgn0036165	chrb
0.982234	7.47909	9.71596	1.94075e-05	0.000293176	3.01734	FBgn0016754	sba
-1.51564	1.70908	-9.71549	1.94139e-05	0.000293176	3.35802	FBgn0029885	CG3224
-1.90436	1.54675	-9.70961	1.94944e-05	0.000293401	3.39032	FBgn0266431	CG45061
-1.10772	3.80681	-9.69857	1.96467e-05	0.000295196	3.05125	FBgn0026751	XRCC1
1.21738	3.36603	9.69305	1.97235e-05	0.000295392	3.08902	FBgn0030077	CG15365
1.09966	4.38307	9.69287	1.97259e-05	0.000295392	2.98521	FBgn0031602	CG15431
0.971559	7.06326	9.68613	1.982e-05	0.000296306	2.98069	FBgn0040260	Ugt36Bc
-1.06657	2.93357	-9.68312	1.98622e-05	0.000296441	3.14678	FBgn0047114	CG31142
3.33933	-1.11078	9.6796	1.99116e-05	0.000296525	3.46708	FBgn0031690	CG7742
0.985177	3.71656	9.67694	1.9949e-05	0.000296525	3.03127	FBgn0022160	Gpo-1
-1.45047	4.04661	-9.67564	1.99674e-05	0.000296525	3.02026	FBgn0010358	deltaTry
1.06462	3.47124	9.66897	2.00617e-05	0.000297433	3.0545	FBgn0000024	Ace
0.905672	3.89625	9.66241	2.01552e-05	0.000297652	3.00015	FBgn0035538	DopEcR
-2.59615	1.20932	-9.66143	2.01691e-05	0.000297652	3.42292	FBgn0040602	CG14545
-1.91966	0.938636	-9.65738	2.02269e-05	0.000297905	3.42686	FBgn0030805	wus
-0.934695	8.41907	-9.64776	2.03652e-05	0.000298924	2.99653	FBgn0034398	CG15098
-1.30915	3.53688	-9.64528	2.0401e-05	0.000298924	3.04651	FBgn0033427	CG1868
1.11437	4.57676	9.64015	2.04754e-05	0.000298924	2.93194	FBgn0028552	gammaSnap1
1.01002	6.07291	9.63863	2.04974e-05	0.000298924	2.9142	FBgn0086358	Tab2
0.969156	5.38824	9.63645	2.05292e-05	0.000298924	2.90388	FBgn0266429	AstA-R1
1.15315	6.18798	9.63639	2.05301e-05	0.000298924	2.91599	FBgn0030964	Pvf1
-1.89566	1.8001	-9.6333	2.0575e-05	0.000299091	3.2967	FBgn0030904	upd2
-1.26546	2.11604	-9.6281	2.06512e-05	0.000299436	3.2261	FBgn0085203	CG34174
1.03489	5.41833	9.62245	2.07342e-05	0.000299436	2.89345	FBgn0035656	CG10479
-2.15587	2.01371	-9.61665	2.08197e-05	0.000299436	3.2645	FBgn0085319	CG34290
-1.38836	2.34822	-9.61548	2.0837e-05	0.000299436	3.18664	FBgn0033557	CG12325
-1.1713	4.21584	-9.61415	2.08568e-05	0.000299436	2.94911	FBgn0037439	CG10286
1.54663	1.64769	9.61177	2.0892e-05	0.000299436	3.27409	FBgn0037186	CG11241
1.2993	3.5356	9.61095	2.09042e-05	0.000299436	3.00623	FBgn0005695	gcl
-1.78769	4.01659	-9.60809	2.09468e-05	0.000299436	2.98307	FBgn0034728	rad50
0.92488	5.94797	9.60672	2.09672e-05	0.000299436	2.88592	FBgn0036752	Adgf-A
0.910309	5.74247	9.57362	2.14674e-05	0.000305777	2.85619	FBgn0035978	UGP
-1.47019	2.36816	-9.57282	2.14796e-05	0.000305777	3.15362	FBgn0030851	CG8326
-1.5985	2.25366	-9.55898	2.16929e-05	0.000308322	3.16334	FBgn0025634	CG13367
-1.12103	6.97484	-9.55282	2.17885e-05	0.000309045	2.87347	FBgn0039769	CG15534
-1.1967	3.45533	-9.54643	2.18884e-05	0.000309045	2.97577	FBgn0032781	CG9987
1.17436	8.81424	9.54422	2.19229e-05	0.000309045	2.92857	FBgn0014380	RhoL
-1.47842	2.39139	-9.54195	2.19585e-05	0.000309045	3.12642	FBgn0029867	CG3847
-1.08582	3.06449	-9.54149	2.19658e-05	0.000309045	3.01928	FBgn0038903	RpI12
-1.24585	3.10459	-9.54083	2.19761e-05	0.000309045	3.01805	FBgn0013269	FK506-bp1
0.875218	5.7734	9.54022	2.19858e-05	0.000309045	2.83005	FBgn0033494	KCNQ
-1.1947	8.76335	-9.53647	2.20449e-05	0.000309389	2.92064	FBgn0086904	Nacalpha
0.853589	4.9856	9.53169	2.21203e-05	0.000309573	2.82537	FBgn0032938	CG8671
1.40465	2.40547	9.53126	2.21272e-05	0.000309573	3.10004	FBgn0261649	tinc
1.37109	2.19294	9.52309	2.2257e-05	0.000310514	3.12379	FBgn0029935	CG4615
1.56324	2.36297	9.52266	2.22639e-05	0.000310514	3.10351	FBgn0027930	MP1
0.853087	6.85622	9.51457	2.23934e-05	0.000311441	2.83903	FBgn0267336	Glut4EF
-0.867954	5.91122	-9.51415	2.24001e-05	0.000311441	2.81486	FBgn0085227	CG34198
-1.72015	2.7264	-9.50328	2.25756e-05	0.000312918	3.05747	FBgn0259213	CG42313
0.96327	6.18796	9.49991	2.26302e-05	0.000312918	2.80741	FBgn0265991	Zasp52
-0.822009	5.83808	-9.49892	2.26463e-05	0.000312918	2.80116	FBgn0033918	CG8531
-1.00383	4.43416	-9.49621	2.26905e-05	0.000313045	2.8355	FBgn0036512	CG16979
1.01562	6.68989	9.4705	2.31138e-05	0.000318049	2.7988	FBgn0036196	CG11658
1.04623	7.54224	9.46987	2.31244e-05	0.000318049	2.8259	FBgn0037065	CG12974
-0.876932	4.27145	-9.46117	2.32698e-05	0.000319557	2.81647	FBgn0263601	mib1
-0.988762	3.64566	-9.45875	2.33103e-05	0.000319623	2.87795	FBgn0013432	bcn92
-1.31618	4.11527	-9.45099	2.3441e-05	0.000320787	2.8328	FBgn0020270	mre11
0.86409	5.0445	9.43374	2.37348e-05	0.000323952	2.74614	FBgn0035390	scramb2
0.978766	4.26834	9.41279	2.40971e-05	0.000328165	2.77044	FBgn0001296	kar
-1.65719	1.08187	-9.41014	2.41434e-05	0.000328165	3.21645	FBgn0264746	CG44004
1.10878	4.35269	9.40956	2.41536e-05	0.000328165	2.7636	FBgn0263607	l(3)72Dp
1.04282	8.88142	9.40626	2.42114e-05	0.000328446	2.82148	FBgn0028491	CG2930
0.858776	5.3386	9.39975	2.43257e-05	0.000328446	2.71506	FBgn0261461	RhoGAP18B
-1.25799	2.90233	-9.39848	2.43482e-05	0.000328446	2.93402	FBgn0032791	CG18094
1.18594	6.48614	9.39719	2.43709e-05	0.000328446	2.73452	FBgn0267002	unc-104
0.842267	4.44151	9.39672	2.43792e-05	0.000328446	2.74332	FBgn0000228	Bsg25D
1.87584	2.25091	9.39585	2.43947e-05	0.000328446	3.02964	FBgn0032105	borr
-1.20912	4.93163	-9.38143	2.46512e-05	0.000331401	2.7234	FBgn0015773	NetA
1.04482	7.95098	9.37134	2.48325e-05	0.000332602	2.7609	FBgn0035094	CG9380
-1.28505	2.32981	-9.3707	2.4844e-05	0.000332602	2.99538	FBgn0021875	Zfrp8
-1.17556	3.13047	-9.36819	2.48893e-05	0.000332602	2.876	FBgn0028836	CSN7
-0.96101	3.93276	-9.36345	2.49752e-05	0.000333013	2.7701	FBgn0002641	mal
-2.68449	-0.152095	-9.36239	2.49946e-05	0.000333013	3.29008	FBgn0085452	CG34423
-0.987455	3.99061	-9.35794	2.50756e-05	0.000333596	2.76072	FBgn0033921	tej
0.983419	4.98185	9.34522	2.53088e-05	0.000335464	2.67818	FBgn0030743	CG9921
-1.78106	0.697666	-9.34446	2.53228e-05	0.000335464	3.21374	FBgn0262577	CG43117
-0.934699	3.76252	-9.34414	2.53287e-05	0.000335464	2.77184	FBgn0028948	CG15253
-1.03145	3.40495	-9.33206	2.55527e-05	0.000337931	2.80704	FBgn0030510	CG12177
-1.50128	2.30528	-9.3298	2.55949e-05	0.000337989	2.97348	FBgn0032915	CG12050
0.909985	4.37387	9.32199	2.57411e-05	0.000339418	2.68869	FBgn0031882	Rab30
0.905333	7.03925	9.29993	2.61594e-05	0.000344426	2.67312	FBgn0035101	p130CAS
-1.10337	2.5843	-9.27835	2.6576e-05	0.000349396	2.87919	FBgn0021874	Nle
1.47078	2.31458	9.27627	2.66165e-05	0.000349415	2.91367	FBgn0083956	CG34120
0.809984	5.41858	9.2626	2.68848e-05	0.000351446	2.60367	FBgn0030141	Gga
1.35766	1.72545	9.25975	2.69411e-05	0.000351446	2.98525	FBgn0032682	CG10176
-0.919991	3.55756	-9.2594	2.6948e-05	0.000351446	2.72696	FBgn0022246	Rpp30
-2.55978	-0.499591	-9.25677	2.70001e-05	0.000351446	3.21481	FBgn0050342	Prp38
0.913869	6.78709	9.25642	2.70071e-05	0.000351446	2.6296	FBgn0020386	Pdk1
-0.878984	5.06489	-9.24985	2.71376e-05	0.000352631	2.60529	FBgn0030928	CG15044
-0.823455	4.77067	-9.24019	2.7331e-05	0.000354628	2.60671	FBgn0026879	CG13364
1.21487	5.43956	9.22718	2.7594e-05	0.000357522	2.5789	FBgn0066101	LpR1
0.9611	3.58991	9.21443	2.78544e-05	0.000360374	2.67703	FBgn0037781	Fancl
1.08218	8.10957	9.20984	2.79489e-05	0.000360639	2.63593	FBgn0028646	aralar1
0.869948	6.09163	9.20951	2.79556e-05	0.000360639	2.57055	FBgn0037705	mura
-2.67347	-0.929197	-9.2069	2.80096e-05	0.000360815	3.16597	FBgn0010381	Drs
2.13981	4.4673	9.20307	2.80887e-05	0.000361314	2.61618	FBgn0263235	Phae2
1.30564	2.0809	9.19287	2.83011e-05	0.000363523	2.87819	FBgn0001086	fzy
-1.41575	1.85113	-9.18771	2.84092e-05	0.000364388	2.92445	FBgn0015905	ast
-1.15575	3.98133	-9.18234	2.85222e-05	0.000365017	2.62383	FBgn0261995	CG42813
-1.39983	1.84776	-9.18079	2.8555e-05	0.000365017	2.91896	FBgn0030000	CG2260
-1.84514	1.2468	-9.17724	2.86302e-05	0.000365017	3.02133	FBgn0037661	Ada
0.923358	8.05269	9.17455	2.86872e-05	0.000365017	2.60485	FBgn0011742	Arp2
-1.64357	1.43671	-9.17245	2.87318e-05	0.000365017	2.98288	FBgn0266758	Esyt2
-1.24265	1.99165	-9.17155	2.87509e-05	0.000365017	2.88549	FBgn0034351	CG5190
1.0065	13.3015	9.16977	2.87887e-05	0.000365017	2.73584	FBgn0013684	mt:ND5
-1.44287	2.52678	-9.16947	2.87951e-05	0.000365017	2.81096	FBgn0030878	CG6769
0.881661	5.13618	9.16748	2.88376e-05	0.000365017	2.52887	FBgn0025574	Pli
-1.38526	3.08525	-9.16612	2.88666e-05	0.000365017	2.72601	FBgn0030613	Rab3-GEF
-0.814934	4.68069	-9.16279	2.8938e-05	0.000365404	2.54764	FBgn0031494	CG17219
-1.55353	2.47759	-9.14312	2.93632e-05	0.00037025	2.80049	FBgn0035710	SP1173
0.873869	7.70254	9.13905	2.94521e-05	0.000370847	2.56372	FBgn0010516	wal
-1.3464	1.58417	-9.13354	2.95727e-05	0.00037132	2.91927	FBgn0085224	CG34195
-2.34578	-0.0657154	-9.12438	2.97747e-05	0.000373332	3.11132	FBgn0039719	CG15515
-0.870936	6.31671	-9.10277	3.02574e-05	0.000378854	2.49103	FBgn0266580	Gp210
-1.00861	5.71577	-9.08963	3.05553e-05	0.000382048	2.47004	FBgn0029887	CG3198
1.01517	6.46814	9.08354	3.06945e-05	0.000383252	2.47819	FBgn0004914	Hnf4
-0.871874	7.23721	-9.07163	3.09686e-05	0.000385504	2.49311	FBgn0001215	Hrb98DE
1.10395	2.76391	9.07087	3.09863e-05	0.000385504	2.67313	FBgn0034657	LBR
1.05724	3.35813	9.06691	3.10781e-05	0.000385504	2.5869	FBgn0259239	CG42337
-0.942188	7.2375	-9.06648	3.1088e-05	0.000385504	2.48889	FBgn0039735	CG7911
-1.04078	5.05229	-9.06638	3.10904e-05	0.000385504	2.45833	FBgn0034362	CG5323
0.823345	6.28217	9.06027	3.12328e-05	0.000386664	2.45285	FBgn0032727	CG10623
0.81017	4.83835	9.05866	3.12705e-05	0.000386664	2.44638	FBgn0030522	CG11103
2.52998	-0.285705	9.05535	3.1348e-05	0.000386809	3.06414	FBgn0014343	mirr
-1.22546	2.10721	-9.05446	3.13688e-05	0.000386809	2.77335	FBgn0033351	CG8235
-1.03597	3.13584	-9.04934	3.14893e-05	0.000387693	2.613	FBgn0037708	CG9386
-3.8061	-1.33748	-9.04774	3.15271e-05	0.000387693	3.00366	FBgn0037083	CG5656
-1.12301	2.7091	-9.02908	3.19712e-05	0.000392613	2.65968	FBgn0030063	CG1789
-0.82965	4.12471	-9.01642	3.22764e-05	0.000395207	2.46591	FBgn0032258	CG7456
0.8551	5.72633	9.01493	3.23124e-05	0.000395207	2.40277	FBgn0032078	C1GalTA
-1.27749	1.89277	-9.01482	3.2315e-05	0.000395207	2.77485	FBgn0052104	CG32104
-1.97742	2.54641	-9.01173	3.23902e-05	0.000395552	2.7006	FBgn0052379	CG32379
-1.15885	2.83039	-9.01003	3.24318e-05	0.000395552	2.62744	FBgn0036886	CG9300
1.23903	3.74794	8.99443	3.28143e-05	0.000399673	2.48343	FBgn0036373	Tgi
0.94984	5.56116	8.9889	3.29512e-05	0.000400795	2.37998	FBgn0036191	Sug
1.04081	4.02884	8.98657	3.30091e-05	0.000400953	2.44432	FBgn0023516	Pex5
-1.17977	4.56322	-8.98273	3.31047e-05	0.000401258	2.41433	FBgn0033661	CG13185
-0.833033	4.19725	-8.98196	3.3124e-05	0.000401258	2.43118	FBgn0004811	fs(2)ltoPP43
1.10133	7.99735	8.97447	3.33116e-05	0.000402985	2.43813	FBgn0015776	nrv1
0.861363	3.7057	8.96572	3.35322e-05	0.0004051	2.45796	FBgn0053120	CG33120
0.843298	5.0919	8.96348	3.35889e-05	0.0004051	2.3603	FBgn0037934	CG6830
-0.836782	6.11389	-8.96216	3.36224e-05	0.0004051	2.36902	FBgn0034405	Jheh2
-0.851752	5.48149	-8.95723	3.37478e-05	0.000406063	2.35747	FBgn0031868	Rat1
3.64762	1.00774	8.94571	3.40429e-05	0.000407871	2.91773	FBgn0030763	CG9782
-0.931685	5.97747	-8.94514	3.40576e-05	0.000407871	2.35252	FBgn0034292	CG5767
0.958636	5.79775	8.9447	3.40689e-05	0.000407871	2.34577	FBgn0011225	jar
1.07758	4.6965	8.94425	3.40805e-05	0.000407871	2.36101	FBgn0036821	CG3961
0.971436	4.63716	8.92865	3.44851e-05	0.000412162	2.34921	FBgn0041210	HDAC4
0.957201	7.74369	8.90103	3.52151e-05	0.000420325	2.36766	FBgn0003165	pum
0.978377	3.31039	8.89572	3.53576e-05	0.000421462	2.44971	FBgn0053653	Caps
-0.971264	4.49979	-8.89172	3.54652e-05	0.000421751	2.33636	FBgn0051549	CG31549
1.63912	1.26883	8.89131	3.54761e-05	0.000421751	2.76539	FBgn0038492	Mur89F
0.952742	4.58535	8.88804	3.55645e-05	0.00042224	2.31789	FBgn0032782	Rab9
-1.26705	4.28842	-8.88568	3.56284e-05	0.000422438	2.35449	FBgn0000411	D
1.48492	1.66543	8.88109	3.57531e-05	0.000423354	2.69211	FBgn0032840	sNPF
-0.92387	4.2556	-8.87509	3.59166e-05	0.000423453	2.33901	FBgn0014366	noi
-1.01436	3.02347	-8.87145	3.60162e-05	0.000423453	2.48042	FBgn0037017	CG4074
0.885525	8.5445	8.87057	3.60405e-05	0.000423453	2.37049	FBgn0002121	l(2)gl
1.19548	1.86904	8.87039	3.60455e-05	0.000423453	2.64586	FBgn0051676	CG31676
-1.3147	2.21494	-8.87038	3.60456e-05	0.000423453	2.60881	FBgn0039233	CG7006
0.958281	7.44278	8.85919	3.63542e-05	0.000426517	2.32241	FBgn0004362	HmgD
-1.06357	2.61682	-8.82781	3.72358e-05	0.000435792	2.50481	FBgn0036973	Rbbp5
-0.862357	3.66055	-8.82599	3.72877e-05	0.000435792	2.3551	FBgn0034989	CG3356
2.48474	1.48554	8.82588	3.7291e-05	0.000435792	2.71167	FBgn0027608	CG2082
-1.19308	2.40681	-8.8237	3.7353e-05	0.000435948	2.53687	FBgn0033317	CG8635
0.981895	3.0605	8.81855	3.75006e-05	0.0004371	2.41899	FBgn0023180	Orc6
-0.925868	3.33744	-8.81405	3.76301e-05	0.000438038	2.38704	FBgn0001977	CIAPIN1
1.12427	4.90408	8.81203	3.76884e-05	0.000438146	2.24166	FBgn0032449	CG17036
1.00773	4.1973	8.80126	3.80006e-05	0.000439749	2.27293	FBgn0023179	amon
-1.06069	2.47242	-8.80061	3.80196e-05	0.000439749	2.5039	FBgn0038673	CG14286
0.843661	4.55438	8.79737	3.8114e-05	0.000439749	2.24147	FBgn0053052	CG33052
0.9726	8.38936	8.79335	3.82318e-05	0.000439749	2.29969	FBgn0020257	Ppa
-1.28225	2.49013	-8.79307	3.82399e-05	0.000439749	2.50146	FBgn0036772	CG5290
0.882067	6.30296	8.79209	3.82687e-05	0.000439749	2.22862	FBgn0022382	Pka-R2
-1.12409	2.31414	-8.79071	3.83094e-05	0.000439749	2.52151	FBgn0036916	Mtr3
0.94166	5.78469	8.79041	3.83181e-05	0.000439749	2.21522	FBgn0040918	schlank
1.0569	5.24376	8.7849	3.84806e-05	0.000441047	2.20984	FBgn0039602	CG1647
0.763539	4.83795	8.78139	3.85843e-05	0.000441669	2.21305	FBgn0027528	CG9634
0.895515	3.48504	8.76879	3.89599e-05	0.000443922	2.31908	FBgn0045852	ham
-1.58593	1.39894	-8.76874	3.89615e-05	0.000443922	2.66076	FBgn0038597	CG8064
-1.14791	3.66374	-8.76621	3.90373e-05	0.000443922	2.31205	FBgn0033945	CG12868
0.835783	5.81896	8.76579	3.905e-05	0.000443922	2.19418	FBgn0032715	CG17597
-1.32457	1.88972	-8.76521	3.90674e-05	0.000443922	2.57161	FBgn0032819	CG10463
-1.06562	5.9652	-8.76482	3.9079e-05	0.000443922	2.20122	FBgn0261800	LanB1
-1.054	3.72351	-8.7613	3.91852e-05	0.00044422	2.29806	FBgn0036827	CG6843
-0.781611	5.03236	-8.76065	3.92047e-05	0.00044422	2.19672	FBgn0047178	CG32147
1.22903	3.56442	8.75788	3.92884e-05	0.000444606	2.30611	FBgn0051076	CG31076
-2.39591	-0.0936728	-8.74741	3.96064e-05	0.000447638	2.82623	FBgn0034253	CG10936
-1.27824	1.64219	-8.73495	3.9989e-05	0.000451391	2.58328	FBgn0034065	Rrp42
0.86695	4.84825	8.73234	4.00694e-05	0.000451396	2.17197	FBgn0029789	CG3160
-0.758066	5.73372	-8.73166	4.00904e-05	0.000451396	2.16659	FBgn0032956	Cul2
0.843679	5.43653	8.72354	4.03426e-05	0.000453664	2.15423	FBgn0028480	CG17841
-1.10282	2.55045	-8.7146	4.06223e-05	0.000456235	2.42065	FBgn0082585	sprt
-1.39104	4.52295	-8.71017	4.07617e-05	0.000457226	2.1928	FBgn0001285	Jon44E
-0.876865	3.77039	-8.70664	4.08733e-05	0.000457903	2.24162	FBgn0032295	CG12299
-1.6323	0.699337	-8.69553	4.12264e-05	0.000461282	2.69978	FBgn0050440	CG30440
1.08424	8.84612	8.6899	4.14065e-05	0.00046213	2.22817	FBgn0261836	Msp300
3.90263	-1.68849	8.68851	4.14512e-05	0.00046213	2.74518	FBgn0036017	CG3280
-0.917655	3.16719	-8.68832	4.14573e-05	0.00046213	2.30326	FBgn0033454	CG1671
0.773714	5.18429	8.68595	4.15334e-05	0.000462402	2.12263	FBgn0261553	CG42671
1.0963	2.62389	8.68114	4.16887e-05	0.000463554	2.36897	FBgn0003218	rdgB
1.2961	8.08596	8.67901	4.17576e-05	0.000463696	2.19192	FBgn0039430	CG5455
-0.988784	10.1523	-8.67638	4.18429e-05	0.000463696	2.25625	FBgn0000370	crc
0.884574	4.49463	8.67594	4.18571e-05	0.000463696	2.14209	FBgn0032076	CG9510
-1.16595	2.08228	-8.67177	4.19929e-05	0.000464191	2.45859	FBgn0029128	tyn
0.828537	5.64053	8.67138	4.20057e-05	0.000464191	2.11073	FBgn0264078	Flo2
-1.74291	0.937854	-8.66604	4.21801e-05	0.000465544	2.64896	FBgn0051864	Qtzl
0.754791	5.82734	8.65374	4.25851e-05	0.000469434	2.098	FBgn0036298	nst
1.02613	5.80691	8.65059	4.26896e-05	0.000469618	2.09633	FBgn0038974	CG5377
-1.2791	4.38537	-8.65007	4.27069e-05	0.000469618	2.14725	FBgn0033485	RpLP0-like
-2.37616	-0.263151	-8.64442	4.28951e-05	0.000470531	2.75293	FBgn0030629	CG9123
0.971086	7.64832	8.64442	4.28952e-05	0.000470531	2.14629	FBgn0052446	Atox1
-1.53356	1.38381	-8.63353	4.32606e-05	0.000473958	2.54889	FBgn0058006	CG40006
0.938755	8.52434	8.62859	4.34274e-05	0.000474758	2.16386	FBgn0003328	scb
-1.42504	1.93183	-8.62822	4.34399e-05	0.000474758	2.45349	FBgn0034793	asrij
0.848034	4.29184	8.6224	4.36374e-05	0.000476336	2.10992	FBgn0029121	Sras
-0.787766	4.55869	-8.61997	4.37205e-05	0.00047666	2.09693	FBgn0264691	Lst8
-1.05992	2.72391	-8.61808	4.3785e-05	0.000476781	2.31132	FBgn0263605	l(3)72Dn
-0.876783	3.56755	-8.61073	4.40368e-05	0.000478941	2.18329	FBgn0041164	armi
-0.886899	3.80956	-8.60801	4.41306e-05	0.000479378	2.1529	FBgn0250906	Pgk
-1.3802	1.25251	-8.60528	4.42248e-05	0.000479818	2.53981	FBgn0259822	Ca-beta
-0.842283	3.85641	-8.60096	4.43741e-05	0.000480854	2.14058	FBgn0259742	CG42360
0.828879	8.74771	8.59896	4.44438e-05	0.000480958	2.14652	FBgn0260960	Baldspot
0.957483	6.27777	8.59663	4.45246e-05	0.000480958	2.06041	FBgn0032480	Edem2
1.72884	0.793446	8.59605	4.45451e-05	0.000480958	2.59392	FBgn0085424	nub
1.05597	5.47831	8.58447	4.49506e-05	0.00048376	2.03632	FBgn0025335	CG4585
-1.12383	2.24568	-8.5837	4.49775e-05	0.00048376	2.35735	FBgn0036570	IntS9
-1.70644	3.11849	-8.5832	4.4995e-05	0.00048376	2.24675	FBgn0039274	CG11920
0.827105	5.12136	8.58246	4.50211e-05	0.00048376	2.03489	FBgn0264855	AP-2alpha
-1.86108	1.92111	-8.57865	4.51559e-05	0.000484626	2.43026	FBgn0264911	CG44102
0.76839	5.19116	8.57549	4.52679e-05	0.000484943	2.02709	FBgn0027506	EDTP
0.802647	5.68932	8.57475	4.52939e-05	0.000484943	2.02773	FBgn0053144	CG33144
-0.913752	4.0108	-8.56898	4.54994e-05	0.00048656	2.09893	FBgn0034902	CG5532
-1.37519	1.84901	-8.56455	4.56576e-05	0.000487669	2.4108	FBgn0034033	CG8204
-1.51603	1.8842	-8.55558	4.59802e-05	0.000489202	2.40225	FBgn0034117	CG7997
-0.770494	5.63449	-8.55473	4.6011e-05	0.000489202	2.01322	FBgn0038243	CG8066
1.19752	2.72954	8.55448	4.602e-05	0.000489202	2.24665	FBgn0012344	Dh44
-0.967877	4.70167	-8.55165	4.61224e-05	0.000489709	2.0339	FBgn0038020	GstD9
0.829283	4.13186	8.54576	4.63363e-05	0.000490547	2.05677	FBgn0040308	Jafrac2
-1.12043	4.77526	-8.54543	4.63485e-05	0.000490547	2.02885	FBgn0032919	CG9253
0.826092	5.99637	8.54494	4.6366e-05	0.000490547	2.00749	FBgn0264089	sli
0.900387	3.50939	8.54307	4.64345e-05	0.000490691	2.12246	FBgn0032726	CG10621
-1.21329	2.10854	-8.54064	4.65234e-05	0.000491049	2.34462	FBgn0030611	CG15027
0.977691	5.86718	8.53263	4.68173e-05	0.000493569	1.99471	FBgn0003396	shn
-0.769006	5.36337	-8.52888	4.69557e-05	0.000494445	1.99089	FBgn0000447	Dhod
0.781797	7.31287	8.52396	4.71379e-05	0.000495779	2.03062	FBgn0086901	cv-c
1.0961	4.07351	8.51986	4.72903e-05	0.000496798	2.04357	FBgn0053542	upd3
-1.26827	2.2586	-8.51417	4.7503e-05	0.000498447	2.29987	FBgn0010287	Trf
0.845951	4.74371	8.5118	4.75917e-05	0.000498793	1.98528	FBgn0250788	beta-Spec
1.52032	5.05278	8.50729	4.77614e-05	0.000499984	1.98236	FBgn0052695	CG32695
-1.18506	3.11256	-8.50066	4.80121e-05	0.000502021	2.15716	FBgn0010926	l(3)07882
-0.806292	7.35402	-8.49905	4.80732e-05	0.000502073	2.01054	FBgn0022069	Nnp-1
0.887374	5.8488	8.48798	4.84953e-05	0.000505891	1.95486	FBgn0035896	CG6983
-0.810216	4.25614	-8.47702	4.89174e-05	0.000509699	1.99452	FBgn0037071	CG7632
-0.846218	3.63716	-8.47541	4.89797e-05	0.000509754	2.05658	FBgn0031604	Elp3
-0.97725	3.3164	-8.47308	4.90701e-05	0.000509765	2.09888	FBgn0037371	Sym
-1.69049	0.730522	-8.47245	4.90948e-05	0.000509765	2.5142	FBgn0014033	Sr-CI
0.830705	4.65034	8.46722	4.92984e-05	0.000511188	1.95093	FBgn0036240	CG6928
-1.25829	1.551	-8.46562	4.93609e-05	0.000511188	2.3702	FBgn0042712	HBS1
0.796875	4.73747	8.46454	4.94034e-05	0.000511188	1.94353	FBgn0028539	CG31731
-1.34976	1.45336	-8.46258	4.94801e-05	0.00051139	2.38658	FBgn0035901	CG6745
2.50608	-0.262733	8.45669	4.97117e-05	0.00051319	2.60012	FBgn0031646	CG2837
-1.15974	2.38944	-8.45206	4.98945e-05	0.000514483	2.22266	FBgn0033473	CG12128
-1.36443	3.4233	-8.44436	5.02001e-05	0.000516431	2.07173	FBgn0052344	CG32344
1.66563	1.12968	8.44405	5.02124e-05	0.000516431	2.41554	FBgn0034013	unc-5
-0.817429	3.898	-8.44258	5.02713e-05	0.000516431	1.99769	FBgn0011640	lark
0.863	3.47425	8.43977	5.03836e-05	0.000516431	2.03625	FBgn0051601	CG31601
0.781206	6.18812	8.43956	5.03918e-05	0.000516431	1.92002	FBgn0085432	pan
-0.945824	3.07704	-8.43544	5.05572e-05	0.000516431	2.09819	FBgn0034086	CG8441
0.874395	3.83672	8.43503	5.05734e-05	0.000516431	1.98992	FBgn0036826	arx
-0.854645	4.21647	-8.43419	5.06072e-05	0.000516431	1.96129	FBgn0037082	CG5664
0.798048	7.92988	8.43306	5.06528e-05	0.000516431	1.9719	FBgn0013733	shot
1.08124	3.93057	8.43172	5.07066e-05	0.000516431	1.98021	FBgn0035431	CG14968
-0.996374	2.6078	-8.43142	5.07189e-05	0.000516431	2.16606	FBgn0020513	ade5
1.33198	1.32995	8.42191	5.11038e-05	0.000519759	2.35562	FBgn0050085	Rif1
-0.979872	5.38362	-8.41844	5.1245e-05	0.000520269	1.89708	FBgn0266581	pit
-0.876434	3.73728	-8.41782	5.12703e-05	0.000520269	1.99495	FBgn0011769	Fdxh
-1.46284	1.44714	-8.41638	5.13293e-05	0.000520277	2.35216	FBgn0035141	Cypl
-1.08874	2.72378	-8.41389	5.1431e-05	0.000520717	2.13574	FBgn0032346	Csl4
0.898664	7.70857	8.40995	5.15929e-05	0.000521564	1.94401	FBgn0052476	mthl14
-1.00213	2.88337	-8.40802	5.1672e-05	0.000521564	2.10414	FBgn0035854	CG8005
-0.828014	4.41913	-8.40759	5.16897e-05	0.000521564	1.92155	FBgn0031497	CG17259
1.20961	2.20113	8.40002	5.20024e-05	0.000523846	2.19577	FBgn0260399	gwl
0.931515	7.06219	8.39827	5.20754e-05	0.000523846	1.91197	FBgn0266186	Vamp7
0.8571	3.89608	8.39788	5.20916e-05	0.000523846	1.9507	FBgn0040233	cana
0.827976	4.43604	8.38565	5.26021e-05	0.000528101	1.89227	FBgn0266377	Pde8
-1.12587	3.57602	-8.384	5.26718e-05	0.000528101	1.99133	FBgn0026376	Rgl
1.4466	2.69819	8.38352	5.26919e-05	0.000528101	2.10874	FBgn0005677	dac
0.816325	4.74495	8.37147	5.32016e-05	0.000532612	1.86133	FBgn0033466	Pal1
-1.32235	3.07839	-8.3666	5.34093e-05	0.000534093	2.04905	FBgn0027550	CG6495
0.845852	7.59862	8.36246	5.35864e-05	0.000535265	1.89825	FBgn0051523	CG31523
-1.7695	0.639247	-8.35873	5.37466e-05	0.000536266	2.43306	FBgn0032973	CG6675
-0.872454	5.02849	-8.35656	5.38401e-05	0.000536601	1.84717	FBgn0032350	CG6287
1.08208	9.08995	8.35111	5.40757e-05	0.000538348	1.94195	FBgn0051901	Mur29B
1.6267	1.4085	8.34486	5.43472e-05	0.00054045	2.2851	FBgn0037292	CG2022
-2.06434	9.33502	-8.34253	5.4449e-05	0.00054086	1.93975	FBgn0039761	CG18404
0.935345	5.56685	8.33929	5.45908e-05	0.000541419	1.82033	FBgn0039112	CG10219
0.907928	4.52497	8.33643	5.47162e-05	0.000541419	1.84379	FBgn0035266	Gk
0.77733	6.75378	8.33507	5.47757e-05	0.000541419	1.84556	FBgn0058191	CG40191
1.49645	1.94966	8.3316	5.49284e-05	0.000541419	2.18259	FBgn0000422	Ddc
0.718871	5.65751	8.33112	5.49498e-05	0.000541419	1.81266	FBgn0011481	Ssdp
0.952988	3.77895	8.33095	5.49573e-05	0.000541419	1.90535	FBgn0020762	Atet
0.962012	2.67234	8.32959	5.50172e-05	0.000541419	2.05515	FBgn0085447	sif
-0.868445	4.38322	-8.32808	5.50842e-05	0.000541419	1.85458	FBgn0022343	CG3760
-0.974143	3.02324	-8.32798	5.50884e-05	0.000541419	2.01248	FBgn0037051	CG10565
-0.787595	5.97316	-8.32747	5.51109e-05	0.000541419	1.81794	FBgn0010741	l(3)01239
1.17188	7.34474	8.32152	5.53749e-05	0.000543415	1.8536	FBgn0000723	FER
0.932848	10.0381	8.3146	5.5684e-05	0.000545366	1.93889	FBgn0035499	Chd64
0.844213	5.25201	8.31434	5.56956e-05	0.000545366	1.79746	FBgn0032131	CG3841
-0.883554	4.54784	-8.30804	5.59787e-05	0.000547537	1.82584	FBgn0010292	bys
-1.16481	5.18721	-8.30628	5.6058e-05	0.000547714	1.80454	FBgn0052984	CG32984
-0.957519	6.15102	-8.29203	5.67052e-05	0.000553432	1.79158	FBgn0010660	Nup214
1.69399	1.33081	8.28875	5.68553e-05	0.000554292	2.25197	FBgn0041605	cpx
1.06508	4.42695	8.28488	5.70328e-05	0.000555418	1.80671	FBgn0038878	CG3301
0.848637	7.78047	8.28111	5.72066e-05	0.000556504	1.83215	FBgn0013770	Cp1
0.823111	6.91141	8.27385	5.75428e-05	0.000559166	1.79632	FBgn0063491	GstE9
-2.76598	-1.11854	-8.26037	5.81726e-05	0.00056439	2.46251	FBgn0031414	eys
-0.826423	3.8714	-8.25965	5.82067e-05	0.00056439	1.83877	FBgn0086856	CG11555
0.736809	6.19759	8.2506	5.86343e-05	0.000567921	1.75225	FBgn0030089	AP-1gamma
-1.72845	0.992517	-8.24905	5.87079e-05	0.000568018	2.29	FBgn0051547	CG31547
0.905175	5.73951	8.24083	5.91001e-05	0.000571194	1.734	FBgn0037551	Gie
1.19479	2.39537	8.23393	5.94316e-05	0.000573682	2.01843	FBgn0038874	ETHR
1.43248	1.17944	8.2328	5.94859e-05	0.000573682	2.21914	FBgn0005638	slbo
0.749943	5.79655	8.22741	5.97463e-05	0.000575573	1.72203	FBgn0004652	fru
-0.892558	3.16182	-8.22169	6.00245e-05	0.000577029	1.89601	FBgn0038491	CG5292
2.01151	0.403267	8.22165	6.00265e-05	0.000577029	2.33753	FBgn0002592	E(spl)m2-BFM
-1.09155	2.70981	-8.21535	6.03341e-05	0.000579363	1.96278	FBgn0032244	RfC3
1.05711	10.4283	8.21175	6.0511e-05	0.000580391	1.85701	FBgn0037358	elm
-0.994238	7.90804	-8.21053	6.0571e-05	0.000580391	1.77476	FBgn0036702	CG6512
-0.951332	8.75898	-8.20766	6.07123e-05	0.00058072	1.80223	FBgn0002607	RpL19
1.08652	2.49441	8.2072	6.07352e-05	0.00058072	1.97692	FBgn0039809	CG15547
-2.71229	-1.37005	-8.19748	6.12172e-05	0.000584703	2.4065	FBgn0034098	krimp
-1.3853	1.85622	-8.19166	6.15076e-05	0.000586457	2.08692	FBgn0037810	sle
-0.997836	3.52267	-8.19117	6.15321e-05	0.000586457	1.82296	FBgn0027084	Aats-lys
3.90287	-1.17944	8.18233	6.19767e-05	0.000589142	2.39451	FBgn0034429	CG18607
-0.765523	4.04246	-8.18208	6.19896e-05	0.000589142	1.75047	FBgn0037623	CG9801
0.895774	5.74117	8.18165	6.20114e-05	0.000589142	1.68066	FBgn0039532	Mtl
-1.20598	2.25285	-8.17789	6.22018e-05	0.000589966	2.00508	FBgn0026431	Grip75
0.830591	6.11378	8.17733	6.22302e-05	0.000589966	1.68433	FBgn0024321	NK7.1
-0.740724	4.56012	-8.17494	6.23516e-05	0.000590491	1.70278	FBgn0038088	CG10126
0.734642	4.96319	8.17277	6.24617e-05	0.000590907	1.67449	FBgn0031990	CG8552
0.716704	5.79759	8.17098	6.2553e-05	0.000591145	1.67106	FBgn0003943	Ubi-p63E
-0.837864	10.8375	-8.16135	6.30469e-05	0.000595184	1.82125	FBgn0261599	RpS29
-0.843697	3.59638	-8.1594	6.3147e-05	0.0005955	1.78111	FBgn0038479	CG17477
1.01285	4.40628	8.15262	6.34982e-05	0.000598181	1.68844	FBgn0050154	CG30154
1.33649	1.26376	8.14784	6.37467e-05	0.000598819	2.12874	FBgn0034187	CG6967
-0.713554	4.82412	-8.14732	6.37739e-05	0.000598819	1.66351	FBgn0040066	wds
-0.699077	5.46899	-8.14654	6.38146e-05	0.000598819	1.64922	FBgn0266000	CG44774
0.755718	6.76193	8.14599	6.38432e-05	0.000598819	1.67615	FBgn0038053	CG18549
-1.4195	1.07902	-8.14163	6.40711e-05	0.000599537	2.17199	FBgn0037435	CG18048
0.874253	5.31186	8.14086	6.41115e-05	0.000599537	1.64129	FBgn0037239	CG11739
-0.719026	4.71472	-8.13822	6.425e-05	0.000600204	1.66056	FBgn0032847	Taf13
0.969938	2.84886	8.13126	6.46174e-05	0.000600905	1.85144	FBgn0032666	CG5758
0.857605	6.79429	8.13055	6.46553e-05	0.000600905	1.66327	FBgn0002719	Men
-2.20536	-0.464102	-8.13019	6.46744e-05	0.000600905	2.34759	FBgn0030742	CG9919
-1.42163	1.58751	-8.13008	6.468e-05	0.000600905	2.07826	FBgn0037882	CG17187
0.826824	7.53386	8.12977	6.46966e-05	0.000600905	1.68756	FBgn0027287	Gmap
1.05629	3.30549	8.12917	6.47283e-05	0.000600905	1.78537	FBgn0043362	bchs
0.967111	6.85987	8.12613	6.48898e-05	0.000601779	1.66148	FBgn0011202	dia
0.818831	9.35925	8.11983	6.52256e-05	0.000603975	1.74435	FBgn0027291	l(1)G0156
0.900232	3.61786	8.11823	6.53111e-05	0.000603975	1.73254	FBgn0013771	Cyp6a9
-0.976793	3.76125	-8.11789	6.53293e-05	0.000603975	1.72704	FBgn0035150	Rev1
-1.17473	2.88405	-8.11626	6.5417e-05	0.000604161	1.85026	FBgn0266284	Ns3
-0.958572	4.9648	-8.11126	6.56861e-05	0.000604388	1.63057	FBgn0039691	IntS11
-0.731535	4.94206	-8.1101	6.57483e-05	0.000604388	1.62568	FBgn0039120	Nup98-96
-1.45497	2.19232	-8.10973	6.57682e-05	0.000604388	1.96192	FBgn0053062	CG33062
0.943227	2.61058	8.10931	6.57912e-05	0.000604388	1.86827	FBgn0033942	Cpr51A
0.795879	4.0228	8.10825	6.58485e-05	0.000604388	1.67806	FBgn0029094	asf1
-3.16563	-0.998299	-8.10813	6.58546e-05	0.000604388	2.34337	FBgn0050383	CG30383
0.740024	6.37607	8.10608	6.59659e-05	0.000604388	1.62711	FBgn0263995	cpo
-0.758378	7.93878	-8.1048	6.60351e-05	0.000604388	1.67975	FBgn0035541	CG15019
-1.00392	2.87764	-8.10453	6.605e-05	0.000604388	1.8354	FBgn0030460	CG2453
-1.43726	2.12367	-8.1024	6.61655e-05	0.000604825	1.96611	FBgn0261535	l(2)34Fd
-1.29157	1.71191	-8.09466	6.65876e-05	0.000607445	2.02154	FBgn0035063	Eap
0.845413	9.74658	8.09465	6.65879e-05	0.000607445	1.73353	FBgn0086687	Desat1
-1.11209	2.42082	-8.09085	6.67965e-05	0.000608726	1.89741	FBgn0039004	Nup133
-0.752943	4.94585	-8.08829	6.69376e-05	0.000609391	1.60608	FBgn0037525	CG17816
1.69925	7.96454	8.08019	6.73849e-05	0.000612839	1.6594	FBgn0034663	CG4363
-0.765936	4.60653	-8.07103	6.78955e-05	0.000616855	1.60607	FBgn0051216	Naam
-0.825404	3.70239	-8.06667	6.81399e-05	0.000617741	1.68363	FBgn0003346	RanGAP
-2.08456	-0.356123	-8.06426	6.82757e-05	0.000617741	2.28538	FBgn0040571	CG17193
1.23343	4.5609	8.06417	6.82804e-05	0.000617741	1.60162	FBgn0031998	SLC5A11
-0.84946	4.51459	-8.06417	6.82807e-05	0.000617741	1.60726	FBgn0034242	CG14480
1.18327	6.12359	8.06314	6.83385e-05	0.000617741	1.58246	FBgn0028509	CenG1A
0.837765	5.36127	8.06086	6.84671e-05	0.000617945	1.56781	FBgn0051248	CG31248
-0.814494	3.71168	-8.06029	6.84993e-05	0.000617945	1.67652	FBgn0037853	CG14696
-0.989722	2.40998	-8.05757	6.86534e-05	0.000618711	1.86555	FBgn0038815	CG5466
0.948671	4.87517	8.05252	6.894e-05	0.000620385	1.5706	FBgn0033987	ckn
-1.12698	1.98697	-8.05186	6.89779e-05	0.000620385	1.93263	FBgn0034583	CG10527
0.71553	5.07838	8.04861	6.9163e-05	0.000621239	1.55871	FBgn0005386	ash1
0.715656	5.02028	8.04776	6.92119e-05	0.000621239	1.55917	FBgn0023215	Mnt
0.776566	4.77919	8.04455	6.93952e-05	0.00062226	1.56482	FBgn0036059	nudE
0.849129	3.94081	8.04007	6.96527e-05	0.000623943	1.62461	FBgn0004394	pdm2
-0.800333	5.01562	-8.0331	7.00559e-05	0.00062601	1.55423	FBgn0031149	CG1518
-0.923164	3.59978	-8.03245	7.00935e-05	0.00062601	1.66759	FBgn0032488	CG16812
-1.30898	1.19139	-8.0253	7.05092e-05	0.000629094	2.0472	FBgn0000346	comt
-0.919274	3.0518	-8.02076	7.07747e-05	0.000630386	1.73104	FBgn0039764	CG15535
-1.16643	2.59051	-8.02042	7.07951e-05	0.000630386	1.80848	FBgn0030630	CG12608
-2.02263	-0.200429	-8.0183	7.09193e-05	0.000630583	2.2351	FBgn0032869	CG17470
1.04204	2.8205	8.01764	7.09582e-05	0.000630583	1.75401	FBgn0039620	wat
0.760448	6.15011	8.0047	7.17238e-05	0.000636162	1.5277	FBgn0015797	Rab6
2.31371	-0.874731	8.00462	7.17284e-05	0.000636162	2.25669	FBgn0004514	Oct-TyrR
0.758416	4.62789	8.00151	7.19138e-05	0.000637175	1.53295	FBgn0259678	sqa
2.23065	0.74953	7.9982	7.21114e-05	0.000638206	2.10583	FBgn0261575	tobi
-0.914838	3.3027	-7.99717	7.21729e-05	0.000638206	1.67383	FBgn0262742	Fas1
0.849136	5.72519	7.995	7.23032e-05	0.000638726	1.50994	FBgn0260003	Dys
-0.888981	2.86386	-7.98818	7.27143e-05	0.000641724	1.72848	FBgn0036121	CG6310
0.809217	5.09528	7.98537	7.28841e-05	0.000642587	1.50119	FBgn0029994	CG2254
-1.3078	2.18069	-7.98393	7.29714e-05	0.000642723	1.84572	FBgn0031078	Nup205
-0.718201	4.40894	-7.97352	7.36061e-05	0.000647676	1.52836	FBgn0022288	l(2)09851
1.37228	1.35242	7.96662	7.40304e-05	0.000650768	1.95406	FBgn0024150	Ac78C
1.04379	8.49481	7.96237	7.4293e-05	0.000651783	1.56943	FBgn0010357	betaTry
0.770563	6.72262	7.95993	7.44443e-05	0.000651783	1.50464	FBgn0261722	fwe
-0.927676	2.86832	-7.95951	7.44702e-05	0.000651783	1.70258	FBgn0025463	Bap60
0.804763	3.45725	7.95793	7.45682e-05	0.000651783	1.60498	FBgn0020621	Pkn
0.875294	3.50988	7.95769	7.45832e-05	0.000651783	1.59901	FBgn0002522	lab
1.06241	8.93961	7.95333	7.48552e-05	0.000653521	1.57751	FBgn0051004	mesh
0.735957	5.39564	7.95082	7.50116e-05	0.000654248	1.46573	FBgn0052062	A2bp1
0.758163	6.03579	7.94291	7.55088e-05	0.000656826	1.46762	FBgn0019972	Drice
0.777531	4.18876	7.94261	7.55276e-05	0.000656826	1.5105	FBgn0023076	Clk
-0.887194	2.9051	-7.93902	7.57546e-05	0.00065816	1.6772	FBgn0029873	CG3918
-0.773696	3.71877	-7.93232	7.61796e-05	0.000660592	1.55741	FBgn0035707	CG8368
0.847351	3.558	7.93228	7.61823e-05	0.000660592	1.56906	FBgn0027558	pgant3
0.832463	3.98592	7.93019	7.63155e-05	0.000661105	1.5189	FBgn0026371	SAK
0.77635	5.91326	7.9266	7.65451e-05	0.000662452	1.44982	FBgn0029849	Efr
-0.866449	3.68644	-7.9233	7.67568e-05	0.000663642	1.55494	FBgn0263219	Dscam4
0.694402	6.0051	7.91813	7.70891e-05	0.000665871	1.44374	FBgn0263873	sick
0.779895	4.92334	7.91618	7.72151e-05	0.000666261	1.44116	FBgn0037788	CG3940
0.810952	7.40655	7.91513	7.72833e-05	0.000666261	1.48647	FBgn0262124	uex
1.2352	9.0665	7.90988	7.76238e-05	0.000668552	1.54169	FBgn0032665	CG15152
0.995295	4.25306	7.90863	7.77053e-05	0.000668609	1.47616	FBgn0034494	CG10444
-1.03576	2.48988	-7.90735	7.77887e-05	0.000668684	1.71718	FBgn0003330	Sce
0.89126	9.82567	7.90176	7.81537e-05	0.000671176	1.55903	FBgn0261552	ps
0.708781	5.70494	7.88548	7.9229e-05	0.000679407	1.40756	FBgn0265194	Trpm
-0.854687	3.89415	-7.88495	7.92642e-05	0.000679407	1.49556	FBgn0266570	CG2982
1.09858	7.28957	7.88019	7.95823e-05	0.000681481	1.45016	FBgn0031579	CG15422
-0.724973	5.76646	-7.87779	7.97426e-05	0.0006822	1.40446	FBgn0039175	CG5706
0.683445	6.09512	7.87269	8.00855e-05	0.000683485	1.40375	FBgn0086899	tlk
-1.095	1.91482	-7.87143	8.01701e-05	0.000683485	1.7799	FBgn0035073	CG16896
0.829597	7.9016	7.87131	8.01786e-05	0.000683485	1.46287	FBgn0039358	CG5028
-0.988448	3.67794	-7.87101	8.01989e-05	0.000683485	1.5108	FBgn0027088	Aats-gly
-0.858748	3.51417	-7.86988	8.02751e-05	0.000683485	1.52689	FBgn0010803	Aats-trp
0.837602	3.15519	7.86611	8.05299e-05	0.000685002	1.56192	FBgn0004381	Klp68D
-0.817215	3.53556	-7.86425	8.06564e-05	0.000685426	1.51787	FBgn0027599	CG2790
3.96806	-0.434407	7.85874	8.1031e-05	0.00068668	2.13639	FBgn0000451	ect
1.63263	1.28326	7.85866	8.10364e-05	0.00068668	1.87628	FBgn0002878	mus101
-1.31091	2.53621	-7.85831	8.10609e-05	0.00068668	1.67365	FBgn0001341	l(1)1Bi
0.914203	2.76197	7.85757	8.11112e-05	0.00068668	1.61394	FBgn0036815	HipHop
0.73737	6.58566	7.85463	8.13124e-05	0.000687515	1.40217	FBgn0052529	Hers
-1.07993	4.25884	-7.85388	8.13637e-05	0.000687515	1.43789	FBgn0039305	CG11858
3.04147	0.862214	7.84905	8.16955e-05	0.000689357	1.99032	FBgn0051106	CG31106
-0.720268	4.66418	-7.84779	8.17823e-05	0.000689357	1.39572	FBgn0034792	CG3499
-1.33164	1.35843	-7.84735	8.1813e-05	0.000689357	1.86007	FBgn0262987	CG43295
-1.0122	2.11908	-7.84559	8.19347e-05	0.000689733	1.72022	FBgn0019990	Gcn2
-0.736053	4.52373	-7.84395	8.20475e-05	0.000690033	1.40088	FBgn0263603	Zn72D
1.74942	6.00209	7.83854	8.24234e-05	0.000692543	1.37678	FBgn0039310	CG11878
-0.763332	4.10571	-7.82524	8.33544e-05	0.000699051	1.41689	FBgn0037150	CG7133
-0.715097	4.51224	-7.82404	8.34389e-05	0.000699104	1.38255	FBgn0026262	bip2
-0.706941	7.13989	-7.81081	8.43782e-05	0.000706227	1.38022	FBgn0024352	Hop
-0.778348	3.56328	-7.80984	8.44471e-05	0.000706227	1.46265	FBgn0266083	ocm
-1.87104	2.17753	-7.80555	8.47547e-05	0.000707489	1.70506	FBgn0031558	CG16704
-0.927961	2.49969	-7.80553	8.47562e-05	0.000707489	1.61869	FBgn0035405	pfk
-1.52285	1.92773	-7.80255	8.497e-05	0.000708612	1.72919	FBgn0038869	CG3353
-1.03489	2.11285	-7.7964	8.54144e-05	0.000711525	1.67644	FBgn0038055	trus
0.766333	7.74544	7.79551	8.54785e-05	0.000711525	1.38645	FBgn0031213	galectin
-0.971482	2.92764	-7.78762	8.60524e-05	0.000714043	1.53605	FBgn0020909	Rtc1
1.51821	0.702158	7.78732	8.60744e-05	0.000714043	1.90225	FBgn0037475	Fer1
0.821701	7.15072	7.78714	8.60878e-05	0.000714043	1.35837	FBgn0052066	CG32066
0.900862	4.76596	7.78696	8.61005e-05	0.000714043	1.32814	FBgn0261238	Alh
-3.68996	-1.72297	-7.78184	8.64756e-05	0.00071649	2.06815	FBgn0259972	Sfp77F
0.69206	5.93743	7.77518	8.6966e-05	0.000719885	1.30854	FBgn0005536	Mbs
-0.966561	2.78743	-7.77079	8.72913e-05	0.00072191	1.54176	FBgn0034029	eIF2B-gamma
1.14764	2.48442	7.76718	8.75596e-05	0.000723459	1.5788	FBgn0038588	CG7156
0.915138	4.16556	7.764	8.77967e-05	0.000724749	1.34755	FBgn0085415	CG34386
0.973879	2.28697	7.75574	8.84157e-05	0.000729185	1.59731	FBgn0004028	wupA
-1.00711	2.31113	-7.75453	8.8507e-05	0.000729265	1.60413	FBgn0034113	CG8060
0.959737	6.3804	7.75007	8.88439e-05	0.000729815	1.29794	FBgn0032006	Pvr
1.10504	8.71798	7.74964	8.88761e-05	0.000729815	1.37965	FBgn0010246	Myo61F
0.92806	5.51505	7.74957	8.88815e-05	0.000729815	1.27946	FBgn0038475	Keap1
0.795925	4.63133	7.74933	8.89003e-05	0.000729815	1.29824	FBgn0085421	Epac
1.27094	1.34203	7.74144	8.94996e-05	0.000734061	1.74802	FBgn0267433	kl-5
1.74296	-0.0453624	7.73585	8.99277e-05	0.000734884	1.96065	FBgn0002466	sti
0.711354	6.35678	7.73557	8.99491e-05	0.000734884	1.28276	FBgn0050011	gem
-0.920222	2.62706	-7.73543	8.99595e-05	0.000734884	1.53254	FBgn0022029	l(2)k01209
-0.747665	4.15246	-7.73429	9.00472e-05	0.000734884	1.32678	FBgn0261573	CoRest
-1.15853	1.52646	-7.73421	9.00531e-05	0.000734884	1.72119	FBgn0034646	Rae1
0.970023	5.9305	7.73346	9.01111e-05	0.000734884	1.27005	FBgn0034783	CG9825
-0.810999	6.01381	-7.73262	9.01753e-05	0.000734884	1.27321	FBgn0026400	Noa36
-2.10227	-0.574473	-7.72531	9.07402e-05	0.000738388	2.01104	FBgn0039478	Nep5
-0.741715	4.70675	-7.72492	9.07706e-05	0.000738388	1.27851	FBgn0035524	CG11583
-0.843846	4.15875	-7.72192	9.10034e-05	0.00073961	1.31656	FBgn0034986	mRpS17
-0.740431	4.16371	-7.71604	9.14614e-05	0.000742657	1.30834	FBgn0264291	Det
-1.16314	2.00811	-7.7129	9.17078e-05	0.000743466	1.62003	FBgn0031630	CG15629
0.762645	3.87016	7.7076	9.21239e-05	0.000745248	1.32186	FBgn0261703	gce
1.58027	0.173232	7.70705	9.21673e-05	0.000745248	1.90572	FBgn0038261	CG14856
-1.35047	0.969832	-7.70667	9.21973e-05	0.000745248	1.79747	FBgn0024973	CG2701
-1.08479	3.03463	-7.70481	9.23446e-05	0.000745764	1.44563	FBgn0039215	CG6695
0.802148	8.05482	7.69907	9.27992e-05	0.000748759	1.30667	FBgn0033659	Damm
-0.752882	3.94047	-7.69412	9.31934e-05	0.000751108	1.30948	FBgn0031115	CG11710
-2.49057	-0.593827	-7.69242	9.33292e-05	0.000751108	1.98898	FBgn0050489	Cyp12d1-p
-0.82251	3.74605	-7.69226	9.33424e-05	0.000751108	1.33066	FBgn0039726	eIF2B-alpha
0.876486	7.03887	7.69019	9.35078e-05	0.000751119	1.26297	FBgn0035772	Sh3beta
0.808801	3.18602	7.68918	9.35893e-05	0.000751119	1.39148	FBgn0015316	Try29F
2.05204	-0.235105	7.68836	9.36546e-05	0.000751119	1.94407	FBgn0034070	SP2353
-1.27308	4.50395	-7.68805	9.36798e-05	0.000751119	1.26928	FBgn0032208	CG5604
-1.09742	2.41575	-7.68558	9.38787e-05	0.000751535	1.5253	FBgn0032248	Bug22
0.929843	4.47252	7.68471	9.39485e-05	0.000751535	1.24862	FBgn0003159	ptr
-1.25631	1.80502	-7.68427	9.39839e-05	0.000751535	1.63043	FBgn0036500	CG7275
-1.44777	1.10877	-7.68127	9.42256e-05	0.000752025	1.75522	FBgn0029813	CG15766
-0.864691	9.92267	-7.68094	9.42531e-05	0.000752025	1.35443	FBgn0261602	RpL8
-0.844815	3.03245	-7.68038	9.42976e-05	0.000752025	1.41615	FBgn0039766	CG15536
-1.89636	1.6589	-7.67453	9.47723e-05	0.000755138	1.67444	FBgn0036514	CG12301
0.688575	6.37278	7.67062	9.50914e-05	0.000756556	1.22159	FBgn0052137	CG32137
-0.712499	6.88664	-7.67028	9.51195e-05	0.000756556	1.23881	FBgn0027094	Aats-ala
-0.943539	2.8859	-7.66845	9.52689e-05	0.00075707	1.42969	FBgn0004087	Dhfr
-1.3979	0.987883	-7.66142	9.58465e-05	0.000760984	1.75493	FBgn0038880	SIFaR
-0.680942	4.60074	-7.65775	9.61493e-05	0.000762103	1.21926	FBgn0011573	Cdc37
-1.77615	0.660793	-7.65764	9.6158e-05	0.000762103	1.81631	FBgn0035337	CG15877
0.836138	5.66336	7.65523	9.63577e-05	0.000762634	1.1906	FBgn0003731	Egfr
-0.695585	4.23635	-7.65477	9.63955e-05	0.000762634	1.24276	FBgn0037834	Art1
1.181	4.76072	7.65071	9.6733e-05	0.000764627	1.204	FBgn0031169	CG1494
0.955681	3.0486	7.64756	9.69957e-05	0.000766026	1.37422	FBgn0051660	pog
-0.856851	9.98786	-7.64075	9.75663e-05	0.000769853	1.31814	FBgn0053109	CG33109
0.825917	6.14935	7.63686	9.78946e-05	0.000771157	1.18311	FBgn0030735	CG3632
1.21521	1.70699	7.63626	9.79446e-05	0.000771157	1.5873	FBgn0263220	Hk
-0.991054	2.52544	-7.63572	9.79904e-05	0.000771157	1.45726	FBgn0034081	CG10731
-0.842022	3.07068	-7.63278	9.82391e-05	0.000772434	1.36527	FBgn0037883	CG14701
0.712474	6.55526	7.62887	9.85707e-05	0.000774333	1.18787	FBgn0010470	Fkbp14
0.731046	4.19525	7.62783	9.86597e-05	0.000774333	1.21364	FBgn0038312	Zip88E
0.773186	5.82289	7.62688	9.87405e-05	0.000774333	1.16565	FBgn0026593	CG5707
0.71651	4.16904	7.62585	9.88282e-05	0.000774342	1.2139	FBgn0024963	GluClalpha
-1.28474	1.19733	-7.62418	9.89705e-05	0.000774778	1.68066	FBgn0032446	CG5780
-0.685118	6.21573	-7.61719	9.957e-05	0.000778789	1.16768	FBgn0002431	hyd
0.984187	8.62256	7.61419	9.98284e-05	0.000779967	1.24758	FBgn0035083	Tina-1
-1.47394	2.77842	-7.61275	9.99525e-05	0.000779967	1.41155	FBgn0036727	CG7589
-1.381	1.52531	-7.6124	9.99824e-05	0.000779967	1.61669	FBgn0033929	Tfb1
1.50898	0.621674	7.60165	0.000100917	0.000785343	1.74455	FBgn0028675	Sur
1.10939	2.20248	7.60144	0.000100935	0.000785343	1.46894	FBgn0035941	CG13313
1.64795	0.000784173	7.59842	0.000101199	0.000786713	1.83062	FBgn0036040	CG6749
-1.47458	0.497478	-7.59578	0.00010143	0.000787824	1.77238	FBgn0030659	CG9215
0.717191	5.63255	7.59409	0.000101579	0.000788296	1.13109	FBgn0037933	Ho
-1.3988	1.29327	-7.59183	0.000101778	0.000789154	1.63833	FBgn0035159	CG13896
0.724597	7.36985	7.58916	0.000102014	0.000790297	1.17785	FBgn0264785	Hph
-0.853478	4.41727	-7.57999	0.000102828	0.000795915	1.16069	FBgn0034641	mahj
0.907863	3.80135	7.57755	0.000103045	0.000796907	1.20731	FBgn0026755	Ugt37b1
0.80034	6.4309	7.57317	0.000103438	0.000799252	1.1305	FBgn0262518	Rab8
0.71506	4.02212	7.56709	0.000103985	0.0008025	1.17168	FBgn0031951	r2d2
-0.796198	4.30145	-7.56651	0.000104038	0.0008025	1.15521	FBgn0032194	CG4901
0.785415	5.25718	7.56199	0.000104447	0.00080496	1.09978	FBgn0032474	DnaJ-H
0.816317	6.17541	7.55637	0.000104959	0.000807444	1.10657	FBgn0026787	Nhe1
-0.723806	3.8077	-7.55562	0.000105027	0.000807444	1.19096	FBgn0024188	san
-0.767259	4.67232	-7.55547	0.00010504	0.000807444	1.11905	FBgn0034734	CG4554
-0.70381	5.43167	-7.55383	0.00010519	0.000807905	1.09541	FBgn0031418	CG3609
0.841548	3.55236	7.55035	0.000105509	0.000809655	1.20995	FBgn0087002	Rfabg
-0.913158	4.21971	-7.54863	0.000105667	0.000810173	1.14773	FBgn0034275	CG5002
-0.737816	3.77133	-7.54038	0.000106429	0.000815315	1.18086	FBgn0030433	mRpL49
-1.19737	2.28752	-7.53926	0.000106532	0.000815411	1.41096	FBgn0037644	CG11964
-0.672076	5.08781	-7.53788	0.000106661	0.000815696	1.08389	FBgn0264272	mwh
0.730197	5.14935	7.53629	0.000106808	0.000816123	1.07557	FBgn0035023	ITP
0.940599	5.29287	7.53297	0.000107118	0.000817197	1.07293	FBgn0029932	CG4607
1.96184	0.377817	7.53282	0.000107131	0.000817197	1.7306	FBgn0004133	blow
-1.64419	0.764215	-7.52971	0.000107422	0.000818106	1.67845	FBgn0001330	kz
-1.2537	1.49868	-7.52936	0.000107455	0.000818106	1.53806	FBgn0262141	CG42867
0.768534	5.21109	7.52862	0.000107525	0.000818106	1.06776	FBgn0030432	CG4404
-1.06253	3.7123	-7.52588	0.000107782	0.00081936	1.18236	FBgn0026575	hang
0.903047	7.51175	7.52167	0.000108178	0.000821154	1.11785	FBgn0058263	MFS17
-0.797567	3.73015	-7.52143	0.000108201	0.000821154	1.16876	FBgn0036686	CG7728
1.23344	2.7381	7.51717	0.000108604	0.000822889	1.30329	FBgn0259246	brp
1.39986	6.48191	7.51593	0.000108722	0.000822889	1.0787	FBgn0035356	CG16986
1.12636	3.33352	7.51539	0.000108773	0.000822889	1.21034	FBgn0085422	CG34393
0.89582	2.50457	7.51508	0.000108802	0.000822889	1.3326	FBgn0031981	CG7466
1.04186	2.91737	7.51416	0.00010889	0.000822889	1.2682	FBgn0004919	gol
-1.69866	0.84031	-7.51213	0.000109083	0.000823653	1.65239	FBgn0025388	CG12179
-0.693	5.04796	-7.50619	0.000109651	0.000826543	1.05459	FBgn0027090	Aats-gln
-1.02759	1.89176	-7.49846	0.000110394	0.000830766	1.43339	FBgn0042085	Bap170
-1.70609	0.731474	-7.4976	0.000110478	0.000830766	1.65548	FBgn0036278	CrzR
-0.905101	8.06907	-7.49747	0.00011049	0.000830766	1.1154	FBgn0053126	NLaz
-2.85523	-1.5692	-7.48368	0.000111832	0.000839756	1.82732	FBgn0035948	CG5644
-0.72073	3.87396	-7.48325	0.000111874	0.000839756	1.11388	FBgn0030530	jub
0.730032	5.65545	7.47353	0.000112832	0.000845763	1.01501	FBgn0035371	CG9977
0.790571	5.16197	7.47321	0.000112863	0.000845763	1.01481	FBgn0033915	CG8485
-0.703552	7.10407	-7.47173	0.000113009	0.000846148	1.05545	FBgn0029897	RpL17
-2.01425	0.258089	-7.46776	0.000113403	0.000848389	1.70393	FBgn0051897	CG31897
0.809363	6.15109	7.46566	0.000113613	0.000849247	1.01808	FBgn0026061	Mipp1
0.865874	4.4183	7.46249	0.00011393	0.000850739	1.03798	FBgn0039466	CG5521
1.47487	1.40337	7.46139	0.00011404	0.000850739	1.48141	FBgn0035091	CG3829
-0.668126	6.89702	-7.46081	0.000114098	0.000850739	1.03763	FBgn0004436	Ubc6
-0.905607	4.57383	-7.45747	0.000114433	0.000852524	1.03288	FBgn0028978	trbl
2.61115	4.05805	7.45025	0.000115161	0.000857235	1.11051	FBgn0050360	Mal-A6
0.688967	5.42049	7.44919	0.000115269	0.000857325	0.989214	FBgn0038662	Mpc1
-0.699184	5.8559	-7.44479	0.000115715	0.000859642	0.992857	FBgn0050000	GstT1
0.802525	6.49012	7.44423	0.000115773	0.000859642	1.00764	FBgn0010434	cora
-1.15689	1.3735	-7.44192	0.000116008	0.000860673	1.47402	FBgn0052412	QC
-1.1964	2.29009	-7.43724	0.000116487	0.000862914	1.31294	FBgn0052075	CG32075
0.691555	4.57251	7.43708	0.000116503	0.000862914	1.00083	FBgn0035995	CG3529
-0.671122	5.45782	-7.43268	0.000116955	0.000865547	0.977318	FBgn0001280	janA
-0.669361	5.4337	-7.4231	0.000117948	0.00087073	0.968042	FBgn0040237	bor
-0.890243	2.71516	-7.41825	0.000118453	0.000873738	1.21559	FBgn0034814	CG9890
-0.934685	3.40332	-7.41676	0.000118609	0.000874168	1.11292	FBgn0039863	CG1815
1.65198	0.15751	7.4058	0.000119762	0.000881174	1.63433	FBgn0040477	cid
-2.04912	9.55582	-7.40462	0.000119887	0.000881174	1.07482	FBgn0039760	CG9682
0.704757	7.23752	7.40406	0.000119947	0.000881174	0.994094	FBgn0031883	Caper
0.794803	5.00235	7.40399	0.000119954	0.000881174	0.950731	FBgn0033814	CG4670
0.734988	8.80166	7.39993	0.000120385	0.00088361	1.04745	FBgn0005630	lola
-1.29495	2.42818	-7.39416	0.000121001	0.000887404	1.25163	FBgn0036254	CG5645
0.815104	3.8064	7.39088	0.000121352	0.000889255	1.02489	FBgn0013997	Nrx-IV
0.978605	6.91998	7.38537	0.000121945	0.000892868	0.964762	FBgn0033638	CG9005
1.09229	2.36062	7.38411	0.000122081	0.000893129	1.23391	FBgn0264324	spg
0.834804	6.9809	7.38291	0.000122211	0.000893349	0.96451	FBgn0001168	h
0.816073	6.31527	7.38164	0.000122349	0.000893629	0.940892	FBgn0001089	Gal
0.807326	4.13261	7.37808	0.000122735	0.000895518	0.978222	FBgn0052699	CG32699
0.656075	4.70083	7.37685	0.000122869	0.000895518	0.934222	FBgn0029175	Ext2
-2.76973	0.301664	-7.37649	0.000122908	0.000895518	1.64074	FBgn0265356	tn
-0.705029	4.05356	-7.37099	0.000123509	0.000899162	0.985452	FBgn0031972	Wwox
1.82919	-0.0998092	7.36058	0.000124655	0.000905807	1.62881	FBgn0002633	E(spl)m7-HLH
-2.19512	-1.12034	-7.36043	0.000124671	0.000905807	1.71881	FBgn0266591	CG45116
0.914579	4.89859	7.35994	0.000124726	0.000905807	0.912248	FBgn0020445	E23
-0.949719	2.56222	-7.3582	0.000124918	0.000905967	1.18375	FBgn0020261	pcm
1.08089	3.73016	7.35791	0.000124951	0.000905967	1.00535	FBgn0015380	drl
-0.720313	7.16413	-7.34838	0.000126013	0.000912932	0.936981	FBgn0034436	CG11961
0.805577	8.86506	7.34257	0.000126665	0.000916911	0.99365	FBgn0031285	CG3662
-1.39449	1.28906	-7.34113	0.000126827	0.000917343	1.40152	FBgn0003512	Sry-delta
-0.750443	4.33818	-7.33923	0.000127042	0.000918152	0.930195	FBgn0033571	Rpb5
0.679347	4.74551	7.33178	0.000127887	0.000923516	0.887921	FBgn0036896	wnd
1.68737	0.704718	7.32899	0.000128206	0.000924883	1.48242	FBgn0051345	CG31345
0.992925	4.12701	7.32698	0.000128436	0.000924883	0.931308	FBgn0033904	CG18327
-0.953271	3.16192	-7.32654	0.000128486	0.000924883	1.05924	FBgn0038057	CG12267
-0.714713	6.57165	-7.3265	0.00012849	0.000924883	0.89565	FBgn0003676	T-cp1
-0.682677	6.43982	-7.32474	0.000128693	0.000924976	0.889849	FBgn0027081	Aats-thr
-2.11079	6.25601	-7.32321	0.000128867	0.000924976	0.894822	FBgn0034052	CG8299
1.45439	2.97953	7.32305	0.000128886	0.000924976	1.08245	FBgn0037386	CG1208
2.57254	-0.500651	7.32269	0.000128927	0.000924976	1.64829	FBgn0034137	CG4945
0.710364	6.90628	7.32168	0.000129043	0.000924976	0.901712	FBgn0040005	CG17883
0.634027	5.90331	7.32052	0.000129177	0.000924976	0.869055	FBgn0032717	CG10600
-0.997766	2.17475	-7.31881	0.000129374	0.000924976	1.21145	FBgn0259704	CG42358
-0.902034	3.10178	-7.31877	0.000129379	0.000924976	1.05898	FBgn0024698	Cpsf160
0.659968	4.55722	7.31829	0.000129435	0.000924976	0.884879	FBgn0085478	CG34449
-0.875011	2.60987	-7.31716	0.000129564	0.000925162	1.13363	FBgn0260000	CG17570
-0.651916	5.51064	-7.31569	0.000129735	0.000925626	0.862203	FBgn0032388	CG6686
-0.776852	4.35548	-7.31424	0.000129903	0.000925626	0.904715	FBgn0038387	blp
0.899825	6.87716	7.31392	0.00012994	0.000925626	0.892971	FBgn0012034	AcCoAS
-0.878083	2.76451	-7.30642	0.000130812	0.000929709	1.09835	FBgn0037894	Ranbp9
-1.19755	1.78844	-7.30639	0.000130815	0.000929709	1.27151	FBgn0025629	CG4045
-3.5152	-1.7485	-7.30625	0.000130832	0.000929709	1.67585	FBgn0035777	CG8563
0.79376	8.18867	7.30542	0.000130929	0.000929709	0.930939	FBgn0037094	CG7611
0.70129	7.6406	7.30243	0.000131279	0.000931455	0.907918	FBgn0086676	spin
0.814034	7.10118	7.29231	0.000132472	0.000939173	0.879442	FBgn0027580	CG1516
-0.895706	2.66911	-7.28997	0.000132749	0.000940391	1.09774	FBgn0035152	CG3386
0.712676	4.55355	7.28699	0.000133104	0.000942162	0.854578	FBgn0000719	fog
0.924056	9.26853	7.28595	0.000133228	0.000942292	0.952352	FBgn0037636	CG9821
-1.03297	3.48429	-7.28274	0.000133611	0.000943663	0.973159	FBgn0030447	CG2200
-0.672628	6.83399	-7.28256	0.000133633	0.000943663	0.860514	FBgn0035871	BI-1
0.935783	7.49333	7.28027	0.000133907	0.000944852	0.881095	FBgn0265140	Meltrin
0.798923	5.07717	7.27767	0.000134219	0.000946306	0.824602	FBgn0036756	cln3
1.06478	1.612	7.27294	0.000134789	0.000949578	1.25313	FBgn0263080	CG43348
1.19325	1.98788	7.26731	0.000135471	0.000953628	1.18523	FBgn0039323	CG10559
1.01436	7.64298	7.26557	0.000135682	0.000953656	0.871857	FBgn0024315	Picot
0.925266	4.18307	7.26552	0.000135688	0.000953656	0.864283	FBgn0039350	jigr1
0.732867	4.10553	7.26094	0.000136247	0.000956596	0.864455	FBgn0039110	RanBP3
-0.883948	2.80179	-7.25969	0.000136399	0.000956596	1.04648	FBgn0015829	TfIIEbeta
0.795879	8.58295	7.25946	0.000136427	0.000956596	0.900702	FBgn0019886	Letm1
-2.97108	0.0990448	-7.2499	0.000137604	0.000963017	1.5521	FBgn0015035	Cyp4e3
0.66411	7.28418	7.24939	0.000137667	0.000963017	0.843134	FBgn0264693	ens
-0.717372	6.36269	-7.24938	0.000137668	0.000963017	0.812979	FBgn0032988	Tif-IA
0.624275	6.02601	7.24698	0.000137965	0.000963017	0.799013	FBgn0053100	4EHP
0.735083	5.21908	7.24662	0.00013801	0.000963017	0.790747	FBgn0037363	Atg17
0.972296	2.21063	7.24631	0.000138048	0.000963017	1.1224	FBgn0028879	CG15270
-0.82498	3.71646	-7.24592	0.000138097	0.000963017	0.901476	FBgn0267408	AOX1
0.698277	4.54765	7.2334	0.00013966	0.000972729	0.801561	FBgn0036684	CG3764
1.32943	10.6739	7.23303	0.000139707	0.000972729	0.939865	FBgn0085358	Diedel3
0.941758	9.22529	7.23113	0.000139946	0.000973635	0.896495	FBgn0063649	CG6006
-1.34175	1.01633	-7.22805	0.000140335	0.000975413	1.33897	FBgn0032848	nesd
0.692226	3.85304	7.22737	0.00014042	0.000975413	0.856869	FBgn0015269	Nf1
-0.856903	3.34829	-7.22485	0.00014074	0.000976873	0.929604	FBgn0010282	TfIIFalpha
-1.18095	3.55613	-7.21759	0.000141663	0.00098252	0.90374	FBgn0035791	CG8539
-1.02259	2.45758	-7.21473	0.000142029	0.000983667	1.06238	FBgn0036640	nxf2
-2.50433	-1.27202	-7.21458	0.000142049	0.000983667	1.59598	FBgn0037645	CG11966
-0.752943	4.15122	-7.21304	0.000142246	0.00098427	0.821026	FBgn0031739	CG14005
-1.38619	0.900383	-7.21127	0.000142473	0.000985082	1.34411	FBgn0003483	spn-E
-1.09565	2.17377	-7.20442	0.000143356	0.000990419	1.10206	FBgn0030789	Rrp45
0.803031	2.75373	7.20002	0.000143926	0.000993592	0.983247	FBgn0037646	CAHbeta
-0.642399	5.91598	-7.19763	0.000144237	0.000994784	0.749346	FBgn0034025	GalNAc-T1
-1.22977	1.87932	-7.19699	0.000144322	0.000994784	1.14976	FBgn0028952	Kebab
0.727349	6.40434	7.19395	0.000144719	0.00099672	0.757419	FBgn0015278	Pi3K68D
-1.27975	1.78344	-7.19313	0.000144825	0.00099672	1.1647	FBgn0000810	fs(1)K10
-0.998625	3.14597	-7.19213	0.000144957	0.000996856	0.930013	FBgn0015925	csul
-1.61461	0.66034	-7.19023	0.000145206	0.000997804	1.37243	FBgn0031114	cactin
0.640968	4.65282	7.17858	0.000146744	0.0010076	0.73996	FBgn0029895	CG14441
-0.777337	6.17803	-7.17472	0.000147258	0.00100957	0.733511	FBgn0020278	loco
0.741656	4.01294	7.1725	0.000147554	0.00101083	0.785721	FBgn0037949	CG17360
0.830073	2.98966	7.16679	0.00014832	0.0010153	0.913318	FBgn0004644	hh
0.769777	3.71634	7.15928	0.000149333	0.00102111	0.80513	FBgn0029894	CG14440
0.698	7.50901	7.15803	0.000149502	0.00102111	0.759534	FBgn0026315	Ugt35a
0.887384	2.23785	7.15784	0.000149529	0.00102111	1.0288	FBgn0010382	CycE
-2.28941	-1.33675	-7.15712	0.000149626	0.00102111	1.54528	FBgn0035727	CG10063
1.04567	7.75737	7.15021	0.000150568	0.00102658	0.760807	FBgn0035265	CG18173
0.79167	3.19409	7.14742	0.00015095	0.00102658	0.862971	FBgn0052262	CG32262
0.725442	7.90382	7.14723	0.000150976	0.00102658	0.762623	FBgn0019968	Khc-73
1.11641	4.0373	7.14689	0.000151022	0.00102658	0.762869	FBgn0032780	CG13085
1.08528	5.98262	7.14652	0.000151073	0.00102658	0.699222	FBgn0259227	CG42327
1.45934	0.422943	7.1462	0.000151117	0.00102658	1.34476	FBgn0034440	CG10073
0.968343	4.00328	7.14108	0.000151822	0.00103016	0.757777	FBgn0063492	GstE8
0.855216	3.35695	7.13992	0.000151982	0.00103016	0.833236	FBgn0023536	CG3156
0.974245	8.2379	7.13987	0.000151989	0.00103016	0.768138	FBgn0261794	kcc
-1.05982	1.86678	-7.13827	0.00015221	0.00103088	1.08863	FBgn0250791	alphaSnap
0.88455	7.54587	7.13522	0.000152633	0.00103296	0.73803	FBgn0035425	CG17746
-0.661708	6.65904	-7.13428	0.000152764	0.00103306	0.706626	FBgn0013726	pnut
1.24474	1.85194	7.12993	0.000153369	0.00103637	1.07418	FBgn0265182	CG44247
1.18601	5.47896	7.1283	0.000153596	0.00103652	0.675747	FBgn0264775	CG44013
-0.732739	3.54454	-7.12729	0.000153739	0.00103652	0.802429	FBgn0010355	Taf1
-0.916072	2.48721	-7.12729	0.000153739	0.00103652	0.967249	FBgn0034638	CG10433
1.12336	1.7696	7.11744	0.000155124	0.00104507	1.07371	FBgn0002023	Lim3
-1.65719	2.09962	-7.11543	0.000155408	0.0010462	1.04667	FBgn0026679	IntS4
0.632177	6.3626	7.11189	0.00015591	0.00104875	0.673317	FBgn0263930	dally
0.734753	5.88764	7.11111	0.000156021	0.00104875	0.659858	FBgn0003870	ttk
0.719319	4.48186	7.10869	0.000156366	0.00104949	0.681068	FBgn0035558	CG11357
0.649872	6.05962	7.1044	0.00015698	0.00105281	0.656857	FBgn0033048	CG7881
0.970983	1.81378	7.09838	0.000157845	0.00105782	1.04451	FBgn0035146	CG13893
-0.688918	4.4713	-7.09568	0.000158234	0.00105917	0.675878	FBgn0033428	Updo
0.643981	4.59746	7.09534	0.000158283	0.00105917	0.659393	FBgn0032435	Oatp33Eb
-1.08838	1.37746	-7.09387	0.000158496	0.0010598	1.1331	FBgn0010421	TfIIFbeta
-0.745877	3.30855	-7.09296	0.000158628	0.00105989	0.800408	FBgn0037672	sage
0.836131	4.26693	7.09027	0.000159018	0.00106094	0.680109	FBgn0021967	Pdsw
-0.682533	8.87637	-7.08946	0.000159136	0.00106094	0.741649	FBgn0002526	LanA
0.71122	5.99294	7.08906	0.000159195	0.00106094	0.63978	FBgn0032775	CG17544
0.698086	7.74727	7.08862	0.000159259	0.00106094	0.697888	FBgn0000173	ben
0.788209	7.16806	7.08586	0.000159661	0.00106278	0.675107	FBgn0261556	CG42674
0.728369	3.93502	7.08509	0.000159773	0.00106278	0.705541	FBgn0033113	Spn42Dc
-1.26397	1.92159	-7.08294	0.000160088	0.00106408	1.03081	FBgn0039870	CG1896
0.705006	3.7844	7.08201	0.000160223	0.00106419	0.718883	FBgn0034883	CG17664
0.642077	6.12	7.07727	0.00016092	0.00106802	0.630977	FBgn0035333	CG1317
-0.782928	3.51209	-7.07234	0.000161648	0.00107068	0.752628	FBgn0035335	mRpL23
0.741841	6.88049	7.07229	0.000161657	0.00107068	0.651307	FBgn0086377	Syx7
0.679693	5.12662	7.07213	0.000161679	0.00107068	0.616084	FBgn0038325	Atg4b
0.683488	5.3919	7.06999	0.000161997	0.0010715	0.61195	FBgn0030790	CG4768
0.611746	5.66753	7.06967	0.000162044	0.0010715	0.613475	FBgn0004509	Fur1
0.834363	7.29891	7.06839	0.000162234	0.00107197	0.661954	FBgn0031912	CG5261
0.767438	7.89072	7.0668	0.000162472	0.00107275	0.681025	FBgn0264975	Nrg
-0.646868	4.87598	-7.06354	0.000162957	0.00107504	0.620514	FBgn0036334	CG11267
-1.0538	2.16708	-7.06229	0.000163144	0.00107504	0.96049	FBgn0028919	CG16865
0.993798	5.83451	7.06205	0.00016318	0.00107504	0.610302	FBgn0019643	Dat
0.630852	5.62808	7.05791	0.0001638	0.00107771	0.601113	FBgn0053094	Synd
-0.7518	3.10795	-7.05774	0.000163826	0.00107771	0.794161	FBgn0038858	CG5793
1.31388	1.90368	7.05651	0.000164011	0.00107813	0.993982	FBgn0031393	CG15382
0.669639	4.37415	7.05321	0.000164508	0.00108056	0.632097	FBgn0027603	Ulp1
0.77955	8.69123	7.05246	0.000164622	0.00108056	0.697297	FBgn0038740	CG4562
-0.709455	5.76245	-7.0505	0.000164918	0.00108139	0.598939	FBgn0051712	CG31712
0.67936	7.41674	7.04973	0.000165034	0.00108139	0.647003	FBgn0035583	CG13704
-0.749404	4.76675	-7.04922	0.000165112	0.00108139	0.612996	FBgn0039163	CG5515
0.893985	5.44775	7.04737	0.000165394	0.00108169	0.590521	FBgn0013673	mt:ATPase8
0.871248	7.91938	7.04663	0.000165506	0.00108169	0.661784	FBgn0031190	CG12576
0.876465	9.70884	7.04386	0.000165926	0.00108279	0.724426	FBgn0261822	Bsg
-1.39601	1.63392	-7.04383	0.000165931	0.00108279	1.04818	FBgn0039043	CG17121
0.7121	8.73766	7.0411	0.000166348	0.00108472	0.687586	FBgn0000043	Act42A
0.69081	5.51176	7.03537	0.000167227	0.00108966	0.577269	FBgn0085450	Snoo
0.765333	8.06457	7.03347	0.000167519	0.00109005	0.653635	FBgn0031969	pes
0.661629	7.40978	7.03339	0.000167532	0.00109005	0.630139	FBgn0000721	for
0.668998	4.80726	7.02709	0.000168505	0.00109559	0.579525	FBgn0034733	CG4752
-0.924282	5.78757	-7.02513	0.000168809	0.00109653	0.575433	FBgn0033873	CG6337
-0.756133	3.54726	-7.02458	0.000168895	0.00109653	0.698854	FBgn0024491	Bin1
-0.972575	4.2596	-7.02274	0.000169182	0.00109686	0.624827	FBgn0035006	CG4563
-1.00082	2.08058	-7.02268	0.000169191	0.00109686	0.934333	FBgn0010520	Bka
0.683998	5.77125	7.01615	0.000170211	0.00110108	0.560905	FBgn0011205	fbl
0.749976	7.275	7.01249	0.000170786	0.001104	0.604255	FBgn0264495	gpp
0.688575	4.88419	7.01009	0.000171165	0.00110492	0.559404	FBgn0028743	Dhit
1.19446	3.08519	7.00932	0.000171286	0.00110492	0.746675	FBgn0264494	CG17646
0.709688	7.93144	7.00924	0.000171299	0.00110492	0.623937	FBgn0265082	Cdep
1.01255	5.42872	6.99491	0.000173579	0.00111882	0.538266	FBgn0085223	CG34194
-1.00143	2.6092	-6.99307	0.000173874	0.00111991	0.814384	FBgn0261065	Cpsf73
-0.604765	5.01906	-6.99181	0.000174078	0.00112042	0.541847	FBgn0032821	CdGAPr
0.703354	8.12795	6.99038	0.000174308	0.00112109	0.612036	FBgn0021979	l(2)k09913
-1.20039	1.70629	-6.98763	0.000174751	0.00112313	0.970852	FBgn0005660	Ets21C
-0.606006	5.48719	-6.98388	0.000175359	0.00112611	0.527794	FBgn0025676	CkIIalpha-i3
0.643923	5.95382	6.98321	0.000175467	0.00112611	0.53088	FBgn0263993	CG43736
0.628552	7.03625	6.98205	0.000175655	0.00112643	0.564887	FBgn0265523	Smr
-0.642963	5.09235	-6.98135	0.000175768	0.00112643	0.529871	FBgn0033924	CG8613
-0.705409	8.20819	-6.97429	0.000176922	0.0011326	0.599467	FBgn0261597	RpS26
0.972535	4.03187	6.97391	0.000176984	0.0011326	0.585424	FBgn0033982	Cyp317a1
-0.681045	4.89688	-6.97157	0.000177368	0.00113424	0.526572	FBgn0023171	rnh1
-0.653098	5.16747	-6.96466	0.000178506	0.0011407	0.511547	FBgn0039406	RpL34a
-1.04333	2.96469	-6.96329	0.000178734	0.00114134	0.728179	FBgn0039125	Ndc1
0.644649	5.29862	6.96196	0.000178953	0.00114193	0.501496	FBgn0266084	Fhos
-0.946713	2.99168	-6.96022	0.000179242	0.00114295	0.717849	FBgn0023527	CG3071
0.981555	3.40167	6.95907	0.000179434	0.00114337	0.645712	FBgn0004449	Ten-m
0.795661	5.00119	6.95243	0.000180542	0.00114961	0.497756	FBgn0038828	CG17270
0.79188	5.58834	6.95095	0.000180791	0.00115037	0.491991	FBgn0259143	CG42258
0.669885	8.44219	6.94785	0.000181312	0.00115286	0.580687	FBgn0015795	Rab7
1.74944	0.425083	6.9463	0.000181573	0.00115371	1.15866	FBgn0036731	CG6333
1.44352	0.433118	6.94413	0.000181939	0.00115521	1.14518	FBgn0036725	CG18265
0.812719	4.77927	6.94142	0.000182397	0.00115729	0.494418	FBgn0263110	CG43367
-0.715544	3.54837	-6.93921	0.000182773	0.00115886	0.610527	FBgn0036615	CG4933
0.801987	5.09253	6.93802	0.000182974	0.00115931	0.480975	FBgn0052758	CG32758
-0.772506	2.95976	-6.92448	0.000185293	0.00117317	0.681573	FBgn0030007	CG2263
0.67032	7.3277	6.92259	0.00018562	0.00117417	0.513883	FBgn0033844	bbc
-0.659784	5.05508	-6.92205	0.000185713	0.00117417	0.470073	FBgn0021761	Nup154
-0.702018	7.17042	-6.91936	0.000186179	0.00117628	0.505175	FBgn0045866	bai
0.639845	6.18812	6.91828	0.000186367	0.00117664	0.470343	FBgn0022361	Pur-alpha
0.837612	5.93853	6.91702	0.000186586	0.00117719	0.463146	FBgn0034400	CG15099
1.00246	7.53717	6.90348	0.000188956	0.0011913	0.501657	FBgn0000251	cad
0.69563	6.14888	6.90034	0.00018951	0.00119395	0.450824	FBgn0027339	jim
0.704938	6.41959	6.89852	0.000189833	0.00119514	0.457388	FBgn0000382	csw
-0.656702	4.57697	-6.89643	0.000190202	0.00119663	0.464773	FBgn0032646	CG6412
-0.767723	3.24392	-6.89039	0.000191278	0.00120255	0.603755	FBgn0010391	Gtp-bp
1.01942	3.61933	6.88653	0.00019197	0.00120417	0.542878	FBgn0040383	CG5254
0.709013	7.60227	6.88625	0.000192021	0.00120417	0.485877	FBgn0031968	CG7231
0.684962	5.09951	6.88597	0.00019207	0.00120417	0.425882	FBgn0020767	Spred
-0.903289	2.48398	-6.88595	0.000192074	0.00120417	0.723171	FBgn0032486	CG5705
-0.74283	3.00722	-6.88451	0.000192332	0.0012048	0.632429	FBgn0035372	CG12093
0.652632	3.88395	6.88389	0.000192445	0.0012048	0.504656	FBgn0000097	aop
0.592669	5.53015	6.88281	0.000192639	0.00120517	0.4202	FBgn0038755	Hs6st
0.719951	4.60057	6.87453	0.000194136	0.00121369	0.433918	FBgn0033055	Tbce
-0.958494	1.9713	-6.87304	0.000194407	0.00121454	0.800223	FBgn0003751	trk
0.802582	3.39917	6.87082	0.000194812	0.00121583	0.552742	FBgn0033984	Lap1
0.936463	6.26816	6.86951	0.000195053	0.00121583	0.423259	FBgn0259749	mmy
1.12811	6.67502	6.86925	0.000195099	0.00121583	0.436345	FBgn0034394	CG15096
0.656845	6.47467	6.86892	0.000195159	0.00121583	0.428541	FBgn0050404	Tango11
0.615843	4.74193	6.86243	0.000196351	0.0012222	0.412751	FBgn0026160	tna
0.987387	1.96721	6.86187	0.000196454	0.0012222	0.778816	FBgn0038720	CG6231
-0.806562	2.6583	-6.85908	0.000196967	0.00122454	0.663809	FBgn0037707	RnpS1
0.890035	4.53681	6.85689	0.000197372	0.00122599	0.421699	FBgn0263234	Phae1
0.714754	7.7802	6.85634	0.000197475	0.00122599	0.461203	FBgn0262872	milt
1.23815	1.19657	6.85425	0.000197861	0.00122754	0.915062	FBgn0086356	tum
0.671902	7.29796	6.85146	0.00019838	0.0012299	0.439307	FBgn0050463	CG30463
0.625008	5.28485	6.84991	0.000198669	0.00123084	0.38565	FBgn0028518	CG18480
0.897663	2.33779	6.84659	0.000199289	0.00123354	0.696857	FBgn0036760	CG5567
0.819929	7.27471	6.8461	0.000199381	0.00123354	0.432985	FBgn0036816	Indy
0.716251	5.08532	6.84315	0.000199934	0.0012361	0.382082	FBgn0032935	Atg18b
0.719749	5.16372	6.84113	0.000200315	0.0012376	0.37845	FBgn0085376	CG34347
2.21425	-1.27312	6.83695	0.000201103	0.00124161	1.24585	FBgn0029147	NtR
-0.610401	5.0078	-6.83017	0.000202389	0.0012487	0.375377	FBgn0024329	Mekk1
-0.916498	3.27042	-6.8294	0.000202536	0.00124874	0.540467	FBgn0031044	MKP-4
0.83657	4.34191	6.82161	0.000204025	0.00125705	0.398132	FBgn0262870	axo
0.665651	4.50876	6.82046	0.000204246	0.00125755	0.382906	FBgn0038110	CG8031
0.718578	4.52557	6.81943	0.000204445	0.0012579	0.381197	FBgn0012051	CalpA
1.01869	2.12147	6.81639	0.00020503	0.00126064	0.705572	FBgn0035888	CG7120
-0.71766	3.78693	-6.81515	0.000205271	0.00126093	0.452637	FBgn0020521	pio
-0.666261	3.69948	-6.81469	0.00020536	0.00126093	0.461737	FBgn0031188	CG14613
-0.606575	4.92523	-6.80998	0.000206274	0.00126481	0.357011	FBgn0035997	phol
0.671148	6.9001	6.80729	0.000206797	0.00126715	0.37946	FBgn0266019	rudhira
1.95195	-0.633541	6.80542	0.000207163	0.00126852	1.16315	FBgn0040261	Ugt36Bb
0.759984	8.74258	6.79887	0.000208446	0.0012755	0.438518	FBgn0013576	mtd
0.712786	6.23951	6.79137	0.000209929	0.0012837	0.340241	FBgn0042135	CG18812
0.779179	3.01043	6.78324	0.000211548	0.00129271	0.5183	FBgn0036319	Ent3
-1.09948	1.91614	-6.78174	0.000211849	0.00129316	0.720372	FBgn0030759	CG13014
0.699047	6.32264	6.78143	0.000211911	0.00129316	0.332419	FBgn0004858	elB
0.704159	9.52272	6.77687	0.000212826	0.00129657	0.443923	FBgn0014184	Oda
-0.687016	4.31899	-6.77648	0.000212905	0.00129657	0.359049	FBgn0033155	Br140
0.963128	2.1056	6.77547	0.000213108	0.00129692	0.665052	FBgn0264711	CG43980
-1.97603	-0.912585	-6.77266	0.000213675	0.00129949	1.16499	FBgn0053267	CG33267
-0.989141	2.80162	-6.76911	0.000214395	0.00130299	0.552267	FBgn0041182	Tep2
0.660414	7.12376	6.75216	0.000217868	0.00132319	0.329631	FBgn0024320	Npc1a
1.0705	2.94189	6.74894	0.000218535	0.00132634	0.497798	FBgn0038916	dnd
-0.793817	2.61359	-6.74771	0.00021879	0.00132699	0.555494	FBgn0040294	POSH
0.633163	5.17186	6.74669	0.000219002	0.00132721	0.279058	FBgn0261285	Ppcs
-1.00023	1.75663	-6.74068	0.000220255	0.00133316	0.70344	FBgn0031270	CG13689
0.908331	7.05791	6.73865	0.000220681	0.00133479	0.313084	FBgn0031170	CG1718
-1.01608	3.35662	-6.73797	0.000220822	0.00133479	0.436028	FBgn0260456	CG4806
-0.680316	3.98296	-6.73382	0.000221697	0.00133859	0.345189	FBgn0083986	CG34150
0.861456	5.59456	6.73356	0.000221751	0.00133859	0.266427	FBgn0028538	Sec71
-0.61502	5.07266	-6.73042	0.000222415	0.0013409	0.269256	FBgn0040309	Jafrac1
-0.824639	4.72264	-6.7302	0.000222461	0.0013409	0.28673	FBgn0004698	mus210
-0.808724	2.56938	-6.72962	0.000222584	0.0013409	0.54451	FBgn0031776	CG13993
-1.08689	1.57792	-6.7283	0.000222864	0.00134168	0.725949	FBgn0025185	az2
1.01177	3.02638	6.72725	0.000223085	0.00134211	0.460942	FBgn0030756	CG9903
-0.693136	3.63825	-6.726	0.000223352	0.00134281	0.377013	FBgn0032138	CG4364
-0.827675	3.3399	-6.72327	0.000223932	0.00134493	0.417669	FBgn0024285	Srp54
1.74346	1.7912	6.72293	0.000224005	0.00134493	0.685879	FBgn0054040	CG34040
-0.794062	2.86247	-6.71965	0.000224705	0.00134823	0.48527	FBgn0038106	CG7488
0.762343	6.851	6.71551	0.000225593	0.00135265	0.281425	FBgn0036199	Bmcp
3.04429	-1.63188	6.71348	0.00022603	0.00135436	1.14861	FBgn0032615	CG6012
-1.01438	2.34675	-6.71154	0.000226449	0.00135593	0.569536	FBgn0036775	CG5147
-0.85102	7.54817	-6.71027	0.000226724	0.00135593	0.301055	FBgn0003279	RpL4
-0.872004	2.14518	-6.71016	0.000226747	0.00135593	0.599224	FBgn0032670	CG5783
0.595156	5.0019	6.70873	0.000227056	0.00135687	0.242141	FBgn0033639	CG9003
0.598502	5.31354	6.70677	0.00022748	0.0013585	0.235441	FBgn0031681	pgant5
1.21085	1.62103	6.70574	0.000227705	0.00135893	0.683955	FBgn0033520	Prx2540-1
0.650544	5.11075	6.69331	0.000230421	0.00137114	0.223731	FBgn0036518	RhoGAP71E
-0.786926	3.82238	-6.69315	0.000230457	0.00137114	0.322268	FBgn0039218	Rpb10
-1.39924	0.706986	-6.69299	0.000230493	0.00137114	0.862453	FBgn0031610	CG15436
0.619142	4.22077	6.69162	0.000230793	0.00137114	0.26974	FBgn0038251	Hexim
0.675839	8.66661	6.6912	0.000230888	0.00137114	0.322556	FBgn0001981	esg
-0.614365	4.85043	-6.69118	0.000230892	0.00137114	0.235174	FBgn0034674	CG9304
0.597604	6.53238	6.69079	0.000230977	0.00137114	0.243898	FBgn0023172	RhoGEF2
0.794784	3.54665	6.68989	0.000231177	0.00137141	0.3439	FBgn0032699	CG10383
1.01625	6.53267	6.68651	0.000231924	0.00137407	0.240143	FBgn0028703	Nhe3
0.609524	5.52038	6.68648	0.000231931	0.00137407	0.214593	FBgn0032156	CG13124
0.931567	5.94562	6.68511	0.000232235	0.00137454	0.221371	FBgn0033853	CG6145
-0.890451	7.53789	-6.68473	0.000232319	0.00137454	0.273784	FBgn0032198	eEF1delta
-0.987872	1.68517	-6.68323	0.000232653	0.00137561	0.65625	FBgn0039449	CG6425
0.724151	4.16299	6.68088	0.000233177	0.00137779	0.264621	FBgn0031952	cdc14
0.677441	5.48027	6.67786	0.00023385	0.00138045	0.205634	FBgn0025525	bab2
0.736523	6.5539	6.67749	0.000233935	0.00138045	0.230789	FBgn0001248	Idh
-1.14958	1.30045	-6.67292	0.000234958	0.00138557	0.723191	FBgn0042125	CG18787
-0.822684	2.61893	-6.66982	0.000235658	0.00138815	0.473814	FBgn0036450	Tdrd3
-1.14242	1.30325	-6.66961	0.000235705	0.00138815	0.718869	FBgn0030995	CG7914
-0.636608	5.76267	-6.6688	0.000235888	0.00138831	0.201988	FBgn0022985	qkr58E-2
1.27011	1.30186	6.66699	0.000236297	0.0013898	0.704103	FBgn0264442	ab
0.68609	7.53158	6.66376	0.00023703	0.00139267	0.250513	FBgn0051729	CG31729
0.676496	6.48928	6.66347	0.000237096	0.00139267	0.213634	FBgn0034180	Ehbp1
-1.05843	1.57665	-6.66158	0.000237526	0.00139428	0.656098	FBgn0015527	pen
-1.20294	1.77127	-6.65799	0.000238344	0.00139816	0.621445	FBgn0034817	Art7
1.0908	1.90109	6.64511	0.00024131	0.00141407	0.567701	FBgn0036769	Tsp74F
-0.702056	5.17713	-6.64404	0.000241556	0.00141407	0.177246	FBgn0039067	wda
1.12991	0.980448	6.64265	0.00024188	0.00141407	0.734618	FBgn0004882	orb
-0.584553	4.64544	-6.6426	0.000241892	0.00141407	0.193255	FBgn0003862	trx
-0.577603	4.85332	-6.64167	0.000242107	0.00141407	0.18197	FBgn0038471	CG5220
-0.690601	6.39193	-6.6415	0.000242145	0.00141407	0.188543	FBgn0027086	Aats-ile
0.733233	8.22967	6.64143	0.000242164	0.00141407	0.252583	FBgn0031813	CG9527
1.19403	0.748273	6.63962	0.000242583	0.00141542	0.776001	FBgn0023001	melt
-0.927727	2.06787	-6.63908	0.000242711	0.00141542	0.539837	FBgn0002872	mu2
-0.81468	3.01694	-6.63692	0.000243215	0.00141688	0.374399	FBgn0030545	CG11590
-0.893768	3.78847	-6.63634	0.000243351	0.00141688	0.26881	FBgn0033652	ths
0.768341	3.32135	6.63597	0.000243436	0.00141688	0.317144	FBgn0029835	CG5921
2.03797	6.52769	6.63366	0.000243978	0.0014191	0.187858	FBgn0022700	Cht4
0.787865	10.3085	6.63017	0.000244798	0.00142277	0.312428	FBgn0027779	VhaSFD
1.77379	1.34063	6.62866	0.000245154	0.00142277	0.673409	FBgn0035300	CG1139
-1.09494	2.03291	-6.62845	0.000245204	0.00142277	0.539882	FBgn0002573	sens
0.702287	3.98263	6.62827	0.000245245	0.00142277	0.226595	FBgn0029891	Pink1
-1.21324	0.748025	-6.62642	0.000245683	0.00142439	0.779828	FBgn0010549	l(2)03659
-0.568349	5.6197	-6.62571	0.000245852	0.00142444	0.153939	FBgn0053123	CG33123
-1.06571	1.85887	-6.62159	0.000246829	0.00142863	0.562861	FBgn0032034	Rcd4
-0.666694	5.79241	-6.62131	0.000246894	0.00142863	0.152209	FBgn0040227	eIF-3p66
-0.829059	2.8578	-6.61934	0.000247363	0.00143042	0.381282	FBgn0036277	CG10418
0.843919	4.68032	6.61455	0.000248508	0.00143593	0.157536	FBgn0037856	Leash
0.625637	4.90773	6.61401	0.000248638	0.00143593	0.144565	FBgn0038763	CG4433
0.571071	5.27398	6.61284	0.000248918	0.00143662	0.135677	FBgn0034142	CG8306
-1.02433	1.62093	-6.61054	0.000249469	0.00143887	0.59336	FBgn0039601	CG1523
0.801078	4.89696	6.60831	0.000250007	0.00144105	0.140713	FBgn0036501	CG7272
-0.648088	6.05238	-6.6046	0.000250904	0.00144528	0.139496	FBgn0032815	CG10462
0.583383	4.80307	6.60202	0.000251529	0.00144795	0.135482	FBgn0028397	Tob
-2.26688	-1.05919	-6.60046	0.000251907	0.00144864	1.01348	FBgn0052706	CG32706
0.651997	4.56446	6.60019	0.000251972	0.00144864	0.14685	FBgn0034543	CG30152
0.906036	2.67271	6.59752	0.000252624	0.00145073	0.379556	FBgn0250819	CG33521
-1.10796	0.989958	-6.59737	0.000252661	0.00145073	0.701412	FBgn0030836	CG8664
0.698098	5.34715	6.59386	0.000253517	0.00145471	0.115989	FBgn0015789	Rab10
-2.31415	-1.29021	-6.58872	0.00025478	0.00146094	1.01665	FBgn0030085	CG6999
-0.639307	4.36891	-6.58812	0.000254928	0.00146094	0.154823	FBgn0027526	Ublcp1
-2.28651	-1.08895	-6.58628	0.000255382	0.0014626	1.00181	FBgn0002069	Aats-asp
0.835041	2.60873	6.58533	0.000255616	0.001463	0.376297	FBgn0266916	Cenp-C
0.696012	3.75115	6.58323	0.000256136	0.00146504	0.204227	FBgn0038143	CG9813
0.760108	3.94496	6.58155	0.000256553	0.00146649	0.181262	FBgn0038912	CG6656
1.03801	7.0331	6.57906	0.000257172	0.00146908	0.142923	FBgn0003358	Jon99Ci
1.51939	0.115113	6.57486	0.000258219	0.00147319	0.8264	FBgn0085419	Rgk2
0.618177	7.8528	6.56854	0.000259804	0.00148036	0.16048	FBgn0022893	Df31
0.743922	14.2913	6.56852	0.000259809	0.00148036	0.339154	FBgn0013672	mt:ATPase6
-0.65037	7.02475	-6.56731	0.000260114	0.00148116	0.130038	FBgn0035753	RpL18
-0.679419	3.36589	-6.56655	0.000260305	0.00148131	0.244455	FBgn0036314	CG10754
-1.42515	0.305899	-6.56572	0.000260515	0.00148156	0.799101	FBgn0042106	CG18754
-0.695053	3.13329	-6.56423	0.000260892	0.00148275	0.276282	FBgn0004913	Gnf1
0.590953	5.55985	6.5625	0.00026133	0.0014843	0.0828783	FBgn0034160	CG5550
0.603528	6.3409	6.56029	0.000261889	0.0014851	0.0983788	FBgn0039026	CG7029
1.02532	1.25435	6.5595	0.00026209	0.0014851	0.594325	FBgn0025620	CG13360
0.676216	6.60005	6.55745	0.000262612	0.0014851	0.10436	FBgn0030052	CG12065
0.830822	2.67825	6.55639	0.000262883	0.0014851	0.333478	FBgn0031703	CG12512
1.56228	-0.0825822	6.55625	0.000262919	0.0014851	0.83887	FBgn0035521	VhaM9.7-a
-0.615697	5.26722	-6.5561	0.000262956	0.0014851	0.0805115	FBgn0039044	p53
0.607758	4.50993	6.5561	0.000262957	0.0014851	0.102799	FBgn0033465	Etf-QO
0.671642	5.68611	6.55606	0.000262966	0.0014851	0.0778585	FBgn0004574	Rop
0.874273	7.65606	6.55397	0.0002635	0.00148632	0.138049	FBgn0053181	CG33181
-0.992203	2.4018	-6.55391	0.000263514	0.00148632	0.393137	FBgn0039219	CG13630
0.585834	6.70128	6.55165	0.000264095	0.00148866	0.101747	FBgn0085423	CG34394
-1.09238	1.20316	-6.54968	0.000264601	0.00149057	0.610885	FBgn0032001	CG8360
-1.49669	0.122662	-6.54846	0.000264912	0.00149138	0.811928	FBgn0031052	CG14215
0.716135	2.84798	6.54495	0.000265817	0.00149514	0.291725	FBgn0030678	CG11679
0.728575	9.41954	6.54353	0.000266185	0.00149514	0.193554	FBgn0069923	CG41128
-0.707093	3.75497	-6.54305	0.000266309	0.00149514	0.168816	FBgn0030294	Pa1
-0.906182	1.82332	-6.54285	0.000266361	0.00149514	0.481242	FBgn0051251	CG31251
0.708313	4.9592	6.54263	0.000266416	0.00149514	0.0672171	FBgn0020307	dve
0.64444	3.77259	6.53666	0.000267967	0.0015029	0.151399	FBgn0037473	CG10068
1.72992	0.811393	6.53365	0.000268752	0.00150636	0.671849	FBgn0037563	CG11672
-2.66528	-1.91323	-6.53225	0.000269119	0.00150747	0.982871	FBgn0262636	Lin29
-0.87215	2.13279	-6.53111	0.000269418	0.0015082	0.412701	FBgn0039835	mRpL32
-0.705282	3.47574	-6.52623	0.000270699	0.00151384	0.186719	FBgn0039710	dgt1
-1.04364	1.32159	-6.52599	0.000270763	0.00151384	0.56145	FBgn0030081	CG7246
-0.753421	4.02137	-6.51858	0.000272723	0.00152384	0.11384	FBgn0029882	CG3226
-0.831606	2.26473	-6.51789	0.000272907	0.00152391	0.374113	FBgn0039681	CG7582
-0.917046	5.73029	-6.5172	0.000273091	0.00152399	0.0422728	FBgn0262580	CG43120
0.601714	6.66725	6.5123	0.000274398	0.00153025	0.0581973	FBgn0037530	CG2943
-0.769705	3.18031	-6.51171	0.000274556	0.00153025	0.214691	FBgn0036696	CG14057
0.651851	6.39599	6.50978	0.000275072	0.00153218	0.0460233	FBgn0086254	CG6084
-0.692009	3.22318	-6.50624	0.000276026	0.00153481	0.200696	FBgn0031094	CG9578
-0.825542	4.14437	-6.50621	0.000276033	0.00153481	0.0901147	FBgn0004401	Pep
-0.68229	5.46635	-6.50611	0.00027606	0.00153481	0.0262031	FBgn0034422	CG7137
0.72764	6.52687	6.50377	0.000276692	0.00153737	0.0441508	FBgn0039326	CG10562
-0.685328	4.63941	-6.50263	0.000276998	0.00153811	0.0454908	FBgn0032253	CG5322
0.774951	5.59217	6.49742	0.000278411	0.001545	0.0139039	FBgn0028394	CG17834
1.1172	1.52373	6.4934	0.000279508	0.00154916	0.476521	FBgn0052647	CG32647
-0.726244	3.10382	-6.49245	0.000279767	0.00154964	0.204594	FBgn0015818	Spx
0.806817	6.10676	6.48331	0.000282276	0.00156245	0.00901407	FBgn0029828	CG6067
0.576839	6.84975	6.48247	0.000282511	0.00156245	0.0325797	FBgn0034417	CG15117
-1.10167	0.963137	-6.48213	0.000282604	0.00156245	0.58542	FBgn0038389	CG5516
-0.899029	2.13163	-6.48105	0.000282901	0.00156313	0.360062	FBgn0039336	CG4553
-0.974507	2.31035	-6.47792	0.000283771	0.00156696	0.327133	FBgn0035323	CG13807
-0.650641	7.28302	-6.47587	0.000284341	0.00156833	0.0408803	FBgn0032961	CG1416
1.15401	3.88796	6.47566	0.000284397	0.00156833	0.0794105	FBgn0038349	AOX3
-0.961728	2.09536	-6.47513	0.000284544	0.00156833	0.361826	FBgn0035254	CG7974
-1.09123	1.34806	-6.47334	0.000285045	0.00156982	0.502451	FBgn0261881	l(2)35Be
-0.707903	4.6744	-6.46969	0.000286067	0.00157193	0.00844887	FBgn0035878	CG7182
-0.619319	4.73754	-6.46913	0.000286224	0.00157193	0.00286592	FBgn0027607	CG8230
1.40845	1.14015	6.46891	0.000286284	0.00157193	0.531216	FBgn0261999	CG42817
0.669894	7.9647	6.46849	0.000286401	0.00157193	0.0569811	FBgn0039213	atl
-0.655904	6.23338	-6.46839	0.00028643	0.00157193	-0.00206796	FBgn0031376	Der-1
2.34211	0.979682	6.46726	0.000286748	0.00157272	0.597649	FBgn0013772	Cyp6a8
0.591786	4.05674	6.46425	0.000287595	0.00157543	0.0419025	FBgn0020493	Dad
-0.564498	5.04338	-6.46425	0.000287596	0.00157543	-0.0151865	FBgn0035232	CG12099
0.792945	6.87509	6.46032	0.000288704	0.00158054	0.00946006	FBgn0032889	CG9331
0.676356	5.33557	6.45796	0.000289374	0.00158324	-0.0305225	FBgn0034293	CG14495
-1.21578	1.92204	-6.45645	0.000289804	0.00158461	0.381009	FBgn0010041	GstD5
-1.06241	2.07904	-6.45351	0.000290642	0.00158822	0.344887	FBgn0034923	Upf3
-0.611861	4.58265	-6.45181	0.000291125	0.00158969	-0.00744566	FBgn0027091	Aats-cys
-1.11363	3.02651	-6.45132	0.000291265	0.00158969	0.183435	FBgn0033769	CG8768
0.597071	4.88881	6.4493	0.000291844	0.00159187	-0.0323647	FBgn0261239	Hr39
-1.14699	4.2297	-6.44763	0.000292324	0.00159303	0.0276548	FBgn0025720	Ate1
-0.678931	3.84994	-6.44732	0.000292411	0.00159303	0.0538377	FBgn0014877	Roe1
1.20914	0.998765	6.44438	0.000293257	0.00159666	0.525452	FBgn0033065	Cyp6w1
0.796086	3.58891	6.44329	0.000293572	0.00159741	0.0748191	FBgn0016715	Reg-2
-0.840883	6.47836	-6.44044	0.000294395	0.0016009	-0.0244455	FBgn0051694	CG31694
-1.49315	-0.0662557	-6.43902	0.000294806	0.00160217	0.726951	FBgn0038654	CG14298
1.03596	1.47244	6.43594	0.000295702	0.00160606	0.422811	FBgn0051814	CG31814
0.697723	5.34099	6.43417	0.000296215	0.00160743	-0.0562425	FBgn0039741	CG7943
-0.712913	7.92833	-6.43384	0.000296313	0.00160743	0.0190222	FBgn0003261	Rm62
-0.572761	5.45663	-6.42995	0.000297449	0.00161246	-0.0575864	FBgn0037470	CG1091
2.01592	5.61163	6.42943	0.000297601	0.00161246	-0.0433001	FBgn0002570	Mal-A1
0.581169	5.08147	6.42877	0.000297793	0.00161252	-0.060172	FBgn0037606	CG8032
0.671743	7.62408	6.42808	0.000297996	0.00161264	0.000759837	FBgn0026179	siz
0.927004	2.49836	6.42691	0.000298339	0.00161352	0.226947	FBgn0034179	CG6805
1.30459	3.20709	6.426	0.000298607	0.00161392	0.118956	FBgn0035677	CG13293
0.586714	5.16322	6.42544	0.000298773	0.00161392	-0.0648782	FBgn0035237	CG13917
-0.681768	3.45979	-6.42459	0.000299023	0.00161429	0.0785552	FBgn0027548	nito
1.01184	2.09974	6.42208	0.000299761	0.0016173	0.293488	FBgn0052506	CG32506
-0.565299	5.32719	-6.41954	0.000300513	0.00161959	-0.0684476	FBgn0261791	SmG
1.36521	1.73487	6.41942	0.000300548	0.00161959	0.364836	FBgn0029114	Tollo
-0.698489	3.96432	-6.41797	0.000300977	0.00162093	0.00979673	FBgn0034936	CG2970
0.588399	7.27195	6.41593	0.000301585	0.00162322	-0.0247588	FBgn0267790	rump
0.643399	6.70773	6.41364	0.000302265	0.0016259	-0.0472788	FBgn0085442	NKAIN
-1.27625	1.12602	-6.40559	0.000304674	0.00163768	0.480149	FBgn0030420	CG12717
1.01864	1.50711	6.40511	0.000304821	0.00163768	0.382943	FBgn0032116	Mco1
-0.547778	5.56255	-6.40298	0.00030546	0.00164013	-0.0868632	FBgn0015509	Cul1
-1.02435	2.31108	-6.40168	0.000305854	0.00164126	0.246449	FBgn0025874	Meics
0.700608	8.57844	6.39954	0.0003065	0.00164374	0.00622298	FBgn0052423	shep
-0.599891	5.83006	-6.39808	0.000306942	0.00164512	-0.0886435	FBgn0020497	emb
0.711263	7.73818	6.39704	0.000307257	0.00164582	-0.0289494	FBgn0002609	E(spl)m3-HLH
0.801486	7.33331	6.39366	0.000308284	0.00165034	-0.0468521	FBgn0259935	CG42458
0.629555	5.10818	6.39271	0.000308575	0.00165064	-0.0995867	FBgn0050421	CG30421
0.867228	3.30722	6.39214	0.000308748	0.00165064	0.0586998	FBgn0051201	GluRIIE
-0.625212	4.95979	-6.39166	0.000308895	0.00165064	-0.0906422	FBgn0039450	CG5484
-1.0873	2.75527	-6.38805	0.000309999	0.00165469	0.157636	FBgn0036460	CG5114
-0.656808	4.34117	-6.38797	0.000310023	0.00165469	-0.05891	FBgn0036516	CG7656
-2.65387	-1.09184	-6.38713	0.000310281	0.00165508	0.811608	FBgn0051477	CG31477
0.610886	5.23139	6.38567	0.000310729	0.00165648	-0.109042	FBgn0034897	Sesn
0.628652	5.87908	6.38392	0.000311269	0.00165837	-0.10531	FBgn0015772	Nak
0.810405	4.91433	6.38329	0.000311462	0.00165841	-0.102988	FBgn0038039	CG5196
0.780985	5.19156	6.37822	0.00031303	0.00166577	-0.115511	FBgn0004893	bowl
0.659658	4.24826	6.37463	0.000314145	0.00166971	-0.0731597	FBgn0032243	Klp31E
0.641103	8.55304	6.37398	0.000314346	0.00166971	-0.02272	FBgn0010348	Arf79F
-1.02396	3.02261	-6.37372	0.000314429	0.00166971	0.0969135	FBgn0037608	mRpL19
0.65977	8.57053	6.37343	0.000314519	0.00166971	-0.0226158	FBgn0016694	Pdp1
-0.700848	4.96837	-6.36959	0.000315715	0.00167507	-0.113622	FBgn0022023	eIF-3p40
-1.06252	1.23273	-6.36659	0.000316658	0.00167907	0.409319	FBgn0023542	Nmd3
0.616983	4.47995	6.36363	0.000317587	0.00168301	-0.103927	FBgn0039078	CG4374
0.77665	5.34457	6.36261	0.000317909	0.00168371	-0.133783	FBgn0000008	a
0.719087	5.42525	6.35941	0.000318921	0.00168807	-0.13769	FBgn0262103	Sik3
0.782366	4.30609	6.35863	0.000319166	0.00168837	-0.0944956	FBgn0030817	CG4991
-1.20041	0.751024	-6.35503	0.000320308	0.00169283	0.49401	FBgn0034175	ste24b
-0.589603	5.41851	-6.35478	0.000320388	0.00169283	-0.139536	FBgn0028479	Mtpalpha
-1.04365	1.241	-6.3541	0.000320604	0.00169297	0.393758	FBgn0261119	Prp19
-1.63653	0.174178	-6.34942	0.000322097	0.00169789	0.602447	FBgn0027563	CG9631
-1.44557	1.49703	-6.34928	0.000322143	0.00169789	0.355691	FBgn0030610	CG9065
0.62137	5.96843	6.3488	0.000322296	0.00169789	-0.14178	FBgn0036697	rogdi
1.11622	0.834854	6.34716	0.00032282	0.00169837	0.450063	FBgn0053179	beat-IIIb
-1.64719	0.316154	-6.34635	0.000323081	0.00169837	0.577297	FBgn0035295	Cnb
-0.606906	4.72925	-6.34622	0.000323123	0.00169837	-0.131071	FBgn0037255	Fip1
0.61084	6.45674	6.34588	0.000323233	0.00169837	-0.130375	FBgn0023441	fus
-1.10041	1.97973	-6.34556	0.000323337	0.00169837	0.247098	FBgn0035151	CG17129
-0.663439	3.66197	-6.34483	0.00032357	0.0016986	-0.0356315	FBgn0264273	Sema-2b
-0.717922	2.93029	-6.34159	0.000324614	0.00170308	0.0678038	FBgn0027592	MED15
-0.974409	1.65745	-6.34008	0.000325102	0.00170464	0.296533	FBgn0022724	Taf8
-0.559071	4.98592	-6.33779	0.000325844	0.00170753	-0.15182	FBgn0086443	Aats-asn
0.934736	3.32411	6.3329	0.000327433	0.00171485	-0.00736419	FBgn0010014	CanB
0.688519	6.64789	6.33143	0.000327909	0.0017154	-0.139438	FBgn0031143	CG1532
-0.817408	3.99326	-6.3314	0.000327922	0.0017154	-0.0853101	FBgn0039486	CG6074
1.00602	1.54959	6.32487	0.00033006	0.00172558	0.288263	FBgn0041707	7B2
0.548129	5.5062	6.3233	0.000330575	0.00172726	-0.177925	FBgn0000565	Eip71CD
1.77984	-0.0292734	6.3226	0.000330806	0.00172746	0.59396	FBgn0052105	CG32105
1.21605	1.37444	6.32149	0.000331173	0.00172836	0.322157	FBgn0031490	CG17264
0.905781	7.28646	6.32005	0.000331647	0.00172983	-0.129178	FBgn0032002	CG8353
0.671556	7.11122	6.31828	0.000332234	0.00173188	-0.137328	FBgn0260659	CG42542
-0.930107	2.14485	-6.31503	0.000333312	0.00173648	0.179266	FBgn0035181	CG9205
-0.968156	2.09189	-6.31373	0.000333744	0.00173772	0.188462	FBgn0036405	CG6833
0.615019	8.16799	6.31081	0.000334717	0.00174177	-0.107465	FBgn0014010	Rab5
0.658455	4.25357	6.30302	0.000337331	0.00175276	-0.15236	FBgn0035517	CG1265
0.54302	5.72648	6.30277	0.000337416	0.00175276	-0.197748	FBgn0050372	Asap
-0.573437	5.57458	-6.30017	0.000338291	0.00175629	-0.199431	FBgn0029133	REG
1.01409	3.45437	6.29859	0.000338827	0.00175805	-0.0620518	FBgn0263456	nwk
-0.765512	2.48706	-6.29732	0.000339257	0.00175926	0.0948865	FBgn0259166	CG42271
-0.661383	3.47501	-6.29497	0.000340055	0.00176175	-0.0657562	FBgn0013323	Ptth
-0.720766	9.31415	-6.29474	0.000340131	0.00176175	-0.0811786	FBgn0004867	RpS2
-0.604718	5.3869	-6.2939	0.000340418	0.00176221	-0.206224	FBgn0038244	CG7987
0.556476	6.28182	6.29264	0.000340846	0.00176341	-0.195018	FBgn0035142	hipk
0.55677	5.96707	6.28947	0.000341929	0.00176799	-0.207324	FBgn0263111	cac
-1.17959	1.02594	-6.28452	0.000343626	0.00177573	0.365615	FBgn0051100	CG31100
-0.967932	2.96994	-6.27605	0.000346552	0.00178982	-0.00343308	FBgn0039212	Syx18
0.667034	6.39331	6.27391	0.000347297	0.00179155	-0.211845	FBgn0260938	tay
0.798325	4.95888	6.27281	0.000347679	0.00179155	-0.226369	FBgn0266720	Snap24
-0.650234	3.60247	-6.27246	0.000347802	0.00179155	-0.10817	FBgn0037231	Vps24
0.590591	4.49896	6.27221	0.000347889	0.00179155	-0.206092	FBgn0033734	CG8520
0.712844	3.61154	6.26966	0.000348778	0.00179465	-0.119109	FBgn0033327	PGRP-SC1b
0.660031	6.23294	6.26893	0.000349035	0.00179465	-0.222531	FBgn0000244	by
0.713543	4.19943	6.26876	0.000349093	0.00179465	-0.184778	FBgn0015663	Dot
-0.832035	6.94579	-6.26806	0.000349338	0.00179487	-0.198684	FBgn0034501	CG13868
-0.639364	3.50455	-6.26722	0.000349632	0.00179535	-0.100933	FBgn0030877	Arp8
-0.57073	4.25565	-6.26564	0.000350188	0.00179717	-0.188134	FBgn0030349	CG10353
0.647302	5.48434	6.26465	0.000350534	0.00179792	-0.242411	FBgn0263077	CG43340
0.58831	7.69799	6.26335	0.000350993	0.00179924	-0.17748	FBgn0262582	cic
-0.72037	4.238	-6.26031	0.000352063	0.00180369	-0.189589	FBgn0026147	CG16833
0.752599	6.7402	6.25582	0.000353656	0.00181081	-0.219646	FBgn0036801	MYPT-75D
1.42384	0.041932	6.25222	0.000354936	0.00181523	0.499045	FBgn0003900	twi
-0.851931	2.09831	-6.252	0.000355013	0.00181523	0.116433	FBgn0037555	Ada2b
0.67567	5.67161	6.25168	0.000355128	0.00181523	-0.25468	FBgn0266417	CG45057
2.14492	2.54117	6.24963	0.00035586	0.00181794	0.0635445	FBgn0036155	CG6163
0.593695	7.00638	6.24417	0.000357819	0.0018269	-0.222978	FBgn0036837	CG18135
-1.04248	1.29446	-6.24298	0.000358245	0.00182803	0.262834	FBgn0035903	CG6765
0.681134	7.17603	6.24202	0.000358594	0.00182877	-0.21939	FBgn0035444	CG12012
-1.06235	1.68324	-6.23649	0.000360594	0.00183518	0.181634	FBgn0032907	CG9272
-1.04576	1.16302	-6.23606	0.000360748	0.00183518	0.281025	FBgn0039017	CG6985
-0.760172	2.51812	-6.23602	0.000360765	0.00183518	0.0219011	FBgn0035689	CG7376
0.706265	4.29784	6.23572	0.000360874	0.00183518	-0.230303	FBgn0016059	Sema-1b
-0.644789	4.2817	-6.2357	0.000360878	0.00183518	-0.222169	FBgn0021906	RFeSP
0.56483	5.79964	6.23431	0.000361386	0.00183672	-0.272141	FBgn0086708	stv
-0.68254	3.277	-6.23261	0.000362005	0.00183882	-0.106007	FBgn0034310	Nup75
0.654585	4.58847	6.23143	0.000362434	0.00183896	-0.256587	FBgn0037138	P5CDh1
0.550889	5.86634	6.23141	0.000362443	0.00183896	-0.274099	FBgn0038331	Ccm3
-0.65875	3.11193	-6.23029	0.00036285	0.00183998	-0.0845093	FBgn0011836	Taf2
-0.899011	1.89451	-6.22904	0.000363309	0.00184123	0.1294	FBgn0030013	GIIIspla2
0.728554	10.9532	6.22849	0.000363509	0.00184123	-0.107398	FBgn0000416	Sap-r
0.855687	4.70803	6.2254	0.000364641	0.00184477	-0.267905	FBgn0027843	CAH2
0.562123	6.36921	6.2249	0.000364826	0.00184477	-0.267293	FBgn0263391	hts
-0.911714	7.76246	-6.22318	0.00036546	0.00184692	-0.218357	FBgn0037351	RpL13A
-0.715269	4.28908	-6.21828	0.000367268	0.00185501	-0.240627	FBgn0038307	mRpS10
-0.629638	3.50083	-6.21561	0.000368258	0.00185896	-0.157863	FBgn0035145	MED14
0.651134	9.16939	6.21226	0.000369505	0.00186421	-0.176984	FBgn0002622	RpS3
0.632354	6.19792	6.21156	0.000369765	0.00186446	-0.287421	FBgn0003392	shi
0.619583	7.26492	6.20563	0.000371988	0.00187388	-0.256793	FBgn0039890	CG2316
-1.17917	1.24486	-6.20546	0.000372051	0.00187388	0.237185	FBgn0023521	CG3587
0.748103	8.12144	6.20317	0.000372914	0.00187717	-0.228394	FBgn0004179	Csp
0.559685	5.11582	6.19987	0.000374156	0.00188024	-0.313203	FBgn0039137	CG13604
0.637909	3.8842	6.19963	0.000374248	0.00188024	-0.230177	FBgn0051454	CG31454
-0.631107	3.5658	-6.19932	0.000374365	0.00188024	-0.184813	FBgn0261112	APP-BP1
0.880175	1.94046	6.19758	0.000375025	0.00188249	0.0751885	FBgn0004359	T48
0.753014	6.66056	6.19546	0.000375828	0.00188547	-0.289681	FBgn0039697	CG7834
-1.55463	-0.124479	-6.19413	0.000376335	0.00188695	0.479862	FBgn0016054	phr6-4
0.916611	3.39708	6.19048	0.000377728	0.00189287	-0.175623	FBgn0029843	Nep1
0.633968	5.68227	6.18947	0.000378113	0.00189348	-0.324065	FBgn0001332	L
0.615973	4.47148	6.18712	0.000379012	0.00189612	-0.29877	FBgn0023528	CG2924
-0.685991	2.99806	-6.18622	0.000379359	0.00189674	-0.115251	FBgn0036875	CG9449
0.621383	6.08491	6.18569	0.000379561	0.00189674	-0.319616	FBgn0085446	CG34417
0.950895	2.35927	6.18451	0.000380013	0.00189737	-0.0139189	FBgn0039856	CG1774
-0.599453	3.64505	-6.18402	0.000380205	0.00189737	-0.21279	FBgn0037814	CG6325
1.31611	0.354027	6.18068	0.00038149	0.00190156	0.365489	FBgn0035348	CG16758
-0.586597	6.06883	-6.1804	0.000381599	0.00190156	-0.324168	FBgn0016726	RpL29
0.723594	7.9984	6.17988	0.000381802	0.00190156	-0.259145	FBgn0001297	kay
0.68057	8.18068	6.17809	0.000382493	0.00190394	-0.254155	FBgn0261859	CG42788
0.90193	3.1177	6.17291	0.000384506	0.0019129	-0.154501	FBgn0039054	CG13830
-1.35609	0.178722	-6.17087	0.000385301	0.00191579	0.401862	FBgn0033348	Spt
0.614837	6.81432	6.17001	0.00038564	0.00191641	-0.312634	FBgn0004373	fwd
1.92251	-1.29372	6.16875	0.000386131	0.00191778	0.587271	FBgn0034552	CG17999
-1.70177	-0.929347	-6.15825	0.000390269	0.00193619	0.546802	FBgn0265725	CG44532
1.43612	4.39081	6.15557	0.000391333	0.00194039	-0.314011	FBgn0015766	Msr-110
-0.698346	3.47574	-6.15467	0.000391688	0.00194107	-0.220839	FBgn0026015	Top3beta
0.572848	6.78084	6.15287	0.000392408	0.00194272	-0.333063	FBgn0010825	Gug
-0.964019	2.57284	-6.15274	0.000392457	0.00194272	-0.0741994	FBgn0031266	CG2807
-0.827358	1.89312	-6.15026	0.000393449	0.00194656	0.0406905	FBgn0039189	CG18528
-0.58678	3.86473	-6.14915	0.000393891	0.00194767	-0.278443	FBgn0037723	SpdS
-0.620412	5.8914	-6.14846	0.000394171	0.00194797	-0.363924	FBgn0035473	mge
1.17897	6.68898	6.14767	0.000394484	0.00194844	-0.34171	FBgn0013685	mt:ND6
0.817115	5.44019	6.14508	0.000395527	0.00195252	-0.374976	FBgn0020389	Papss
0.642115	4.30715	6.14051	0.000397368	0.00196052	-0.337931	FBgn0052638	CG32638
0.738959	3.27818	6.13495	0.000399622	0.00197056	-0.223432	FBgn0015576	alpha-Est8
1.66737	1.06697	6.13232	0.000400694	0.00197475	0.191017	FBgn0031546	CG8851
-0.63514	6.29026	-6.13122	0.000401146	0.00197589	-0.372885	FBgn0026252	msk
-0.701759	6.65152	-6.12812	0.000402414	0.00198017	-0.364926	FBgn0000318	cl
0.74938	6.33638	6.12801	0.000402458	0.00198017	-0.376366	FBgn0034490	CG9864
0.598915	7.31049	6.12648	0.000403087	0.00198218	-0.343872	FBgn0000611	exd
0.552043	5.2151	6.12355	0.000404294	0.00198702	-0.400217	FBgn0259170	alpha-Man-I
-2.46631	-1.3318	-6.1215	0.000405138	0.00198822	0.556475	FBgn0032313	CG14070
-1.58001	-0.43303	-6.12111	0.000405301	0.00198822	0.446365	FBgn0053481	dpr7
0.572143	4.40032	6.12039	0.000405598	0.00198822	-0.368749	FBgn0031635	tank
0.782118	5.55691	6.12034	0.000405619	0.00198822	-0.402453	FBgn0034032	CG8195
0.73071	6.05958	6.12026	0.00040565	0.00198822	-0.39345	FBgn0033980	Cyp6a20
0.737452	2.60729	6.11621	0.000407328	0.00199535	-0.136588	FBgn0053346	CG33346
0.6484	7.95208	6.10876	0.000410439	0.00200949	-0.340825	FBgn0086357	Sec61alpha
0.597759	5.10291	6.10566	0.000411742	0.00201476	-0.418595	FBgn0035529	CG1319
0.56934	5.20046	6.10412	0.000412391	0.00201684	-0.421829	FBgn0040752	Prosap
0.74881	10.2076	6.10184	0.000413351	0.00201878	-0.26766	FBgn0013272	Gp150
-0.808957	2.74118	-6.10147	0.000413507	0.00201878	-0.164769	FBgn0005198	gig
0.621201	9.8702	6.10121	0.000413619	0.00201878	-0.277949	FBgn0035770	pst
1.96258	-0.747551	6.10103	0.000413692	0.00201878	0.461799	FBgn0052406	PVRAP
-0.603745	3.55078	-6.09935	0.000414405	0.00202017	-0.29534	FBgn0035532	CG15014
-1.12034	0.836198	-6.09929	0.000414429	0.00202017	0.197346	FBgn0020305	dbe
-0.54257	5.22486	-6.09856	0.00041474	0.00202059	-0.423843	FBgn0015019	Cctgamma
0.569934	6.94694	6.09794	0.000415001	0.00202076	-0.38883	FBgn0038745	CG4538
-0.678701	3.12041	-6.09688	0.000415454	0.00202186	-0.234307	FBgn0052448	CG32448
-0.651676	4.205	-6.09533	0.000416113	0.00202397	-0.372632	FBgn0035374	mRpS35
0.680138	4.29878	6.09256	0.000417294	0.00202861	-0.390998	FBgn0052112	CG32112
-0.967895	1.39705	-6.092	0.000417534	0.00202867	0.0737309	FBgn0051473	CG31473
0.713433	8.99522	6.09021	0.000418296	0.00203127	-0.32034	FBgn0030396	CG2556
-0.582353	4.72241	-6.08725	0.000419569	0.00203535	-0.41989	FBgn0034184	CG9646
1.52431	2.30322	6.08719	0.000419592	0.00203535	-0.0987131	FBgn0262794	CG43175
0.825989	7.81272	6.07784	0.000423632	0.00205272	-0.380704	FBgn0263593	Lpin
0.745663	5.9975	6.07275	0.000425847	0.00206234	-0.448754	FBgn0259111	Ndae1
-0.735083	3.14046	-6.07012	0.000426996	0.00206678	-0.266323	FBgn0032886	CG9328
-0.569597	4.57439	-6.06876	0.000427595	0.00206856	-0.432534	FBgn0036958	CG17233
-0.842174	2.24582	-6.06575	0.000428919	0.00207384	-0.117395	FBgn0266430	CG45060
-0.538775	4.50725	-6.06437	0.000429526	0.00207566	-0.433756	FBgn0262955	RpII140
0.574201	3.91271	6.0637	0.000429822	0.00207596	-0.38654	FBgn0034726	Mes4
0.664252	5.00632	6.06183	0.000430646	0.00207779	-0.465385	FBgn0261383	IntS6
1.01197	1.05981	6.06179	0.000430664	0.00207779	0.0926559	FBgn0259237	CG42335
-1.42495	0.414529	-6.05734	0.000432638	0.00208533	0.241174	FBgn0033169	CG11123
0.627026	4.205	6.05721	0.000432694	0.00208533	-0.423188	FBgn0036446	CG9384
0.593833	6.56151	6.05636	0.000433073	0.0020859	-0.449981	FBgn0039920	CG11360
-0.740737	2.56078	-6.05554	0.000433439	0.0020859	-0.187378	FBgn0035900	ZC3H3
0.613105	5.51922	6.05537	0.000433512	0.0020859	-0.477214	FBgn0000536	eas
0.988313	2.59511	6.0541	0.00043408	0.00208751	-0.200425	FBgn0051812	CG31812
1.65691	-0.74001	6.05323	0.000434469	0.00208825	0.404732	FBgn0038839	CG10830
1.42017	1.30249	6.05202	0.00043501	0.00208973	0.0464849	FBgn0265045	Strn-Mlck
0.606747	8.01089	6.05022	0.000435812	0.00209168	-0.404828	FBgn0039304	CG10425
-0.748327	2.31154	-6.05007	0.000435883	0.00209168	-0.149283	FBgn0033208	mRpL52
-1.20375	0.674478	-6.04854	0.000436568	0.00209384	0.175654	FBgn0259108	futsch
-0.774665	2.50796	-6.04568	0.000437853	0.00209888	-0.188425	FBgn0041147	ida
2.07251	-1.08172	6.04288	0.000439116	0.0021038	0.438821	FBgn0013725	phyl
-0.525685	4.72728	-6.03659	0.000441972	0.00211635	-0.478718	FBgn0035471	Sc2
0.543595	7.02316	6.03523	0.000442592	0.00211818	-0.457169	FBgn0026620	tacc
0.997615	3.10692	6.03377	0.000443257	0.00212023	-0.307487	FBgn0030576	CG15890
-0.907045	1.75968	-6.03318	0.000443525	0.00212038	-0.0630623	FBgn0038760	MED25
0.6123	6.45644	6.03058	0.000444717	0.00212381	-0.482923	FBgn0004910	Eip63F-1
0.545951	4.77655	6.02965	0.000445143	0.00212471	-0.494617	FBgn0052250	CG32250
1.06654	8.17149	6.029	0.000445443	0.002125	-0.421979	FBgn0031653	Jon25Biii
-0.572229	4.11259	-6.02253	0.000448423	0.00213808	-0.447954	FBgn0051633	CG31633
0.691129	3.63686	6.01699	0.000450991	0.00214856	-0.406019	FBgn0085390	Dgk
-1.39785	1.10006	-6.01676	0.000451102	0.00214856	0.0665365	FBgn0036838	CG3808
-0.756401	3.36061	-6.0153	0.000451779	0.00215064	-0.360478	FBgn0002183	dre4
-0.54431	5.55494	-6.01147	0.000453569	0.00215801	-0.523914	FBgn0033547	CG12935
1.43265	2.71934	6.00949	0.000454501	0.0021613	-0.262241	FBgn0033297	Mal-A8
-1.19777	1.5089	-6.00864	0.000454898	0.00216204	-0.03242	FBgn0034360	CG10927
-0.76684	2.56291	-6.00251	0.000457792	0.00217348	-0.247112	FBgn0037898	CG18643
-0.844884	1.73179	-5.99826	0.000459808	0.00218189	-0.098931	FBgn0036365	CG10732
-1.06793	4.304	-5.99642	0.000460681	0.00218488	-0.483104	FBgn0028949	CG15254
-1.04586	1.94036	-5.99572	0.000461016	0.0021853	-0.134732	FBgn0036136	Ufd1-like
-1.28321	0.182622	-5.99415	0.000461766	0.0021877	0.206243	FBgn0010194	Wnt5
-1.12303	2.20276	-5.99162	0.000462978	0.00219189	-0.184632	FBgn0260407	mRpS23
1.43431	1.1255	5.99128	0.000463142	0.00219189	0.0140004	FBgn0044028	Notum
-0.547643	5.14787	-5.99065	0.000463442	0.00219215	-0.545194	FBgn0085430	CG34401
0.678323	2.66963	5.98844	0.000464503	0.00219511	-0.292216	FBgn0025641	DAAM
-1.9232	-1.56461	-5.98833	0.000464559	0.00219511	0.427294	FBgn0040608	CG14246
0.586315	4.61392	5.98736	0.000465023	0.00219615	-0.534142	FBgn0028717	Lnk
1.02542	1.81092	5.98585	0.000465752	0.00219843	-0.135096	FBgn0086367	t
-0.54504	5.08781	-5.98256	0.000467343	0.00220478	-0.553141	FBgn0005674	Aats-glupro
-0.659376	3.23224	-5.98146	0.000467875	0.00220503	-0.382456	FBgn0085192	CG34163
-0.657381	4.7075	-5.97888	0.000469129	0.0022097	-0.540857	FBgn0259682	Jabba
-0.921214	2.407	-5.97654	0.000470271	0.00221391	-0.245054	FBgn0031321	Tgt
0.543786	7.47768	5.97354	0.000471737	0.00221965	-0.511618	FBgn0264493	rdx
-2.47932	-1.94037	-5.97082	0.00047307	0.00222475	0.433954	FBgn0032637	CG5050
-1.1801	2.80398	-5.96755	0.000474674	0.00223112	-0.315105	FBgn0028490	CG31705
-0.942895	2.79341	-5.96005	0.000478391	0.00224741	-0.329737	FBgn0053158	CG33158
-0.736779	3.21711	-5.9522	0.000482306	0.00226461	-0.411966	FBgn0035166	CG13902
0.649612	7.29647	5.94722	0.000484816	0.0022746	-0.548103	FBgn0260462	CG12163
0.510261	5.22499	5.94697	0.000484942	0.0022746	-0.601527	FBgn0010575	sbb
0.582112	5.86323	5.94117	0.000487879	0.0022862	-0.602427	FBgn0050090	CG30090
1.21153	0.705067	5.94102	0.000487955	0.0022862	0.0324543	FBgn0035490	CG1136
-0.613382	3.85122	-5.94057	0.000488182	0.0022862	-0.513072	FBgn0035158	CG13895
0.591731	7.09595	5.92785	0.000494699	0.00231473	-0.577423	FBgn0030478	CG1640
-0.537894	6.29783	-5.92767	0.000494793	0.00231473	-0.604742	FBgn0028734	Fmr1
0.671114	7.7389	5.92637	0.000495461	0.00231664	-0.55637	FBgn0050015	CG30015
-0.539166	7.25014	-5.92534	0.000495995	0.00231793	-0.574781	FBgn0002626	RpL32
0.824026	1.674	5.92367	0.00049686	0.00232018	-0.18339	FBgn0053080	CG33080
-0.580488	4.09769	-5.92341	0.000496996	0.00232018	-0.559791	FBgn0030481	CG1662
-0.814215	2.50135	-5.92059	0.000498458	0.00232496	-0.328413	FBgn0000414	Dab
0.97756	1.60659	5.92044	0.000498539	0.00232496	-0.171982	FBgn0031183	CG14621
-0.617832	4.16708	-5.91805	0.000499786	0.00232956	-0.571895	FBgn0014455	Ahcy13
-1.79024	-0.0528741	-5.91673	0.000500473	0.00233154	0.176353	FBgn0039204	CG6607
0.542625	6.81686	5.91566	0.000501033	0.00233293	-0.601519	FBgn0082582	tmod
1.48331	-0.474726	5.91481	0.00050148	0.0023338	0.216067	FBgn0032891	Oseg5
0.545536	3.99796	5.91402	0.000501891	0.0023345	-0.567121	FBgn0051431	CG31431
1.60278	-0.0549112	5.91343	0.000502203	0.00233473	0.151221	FBgn0024913	Actbeta
-0.718248	2.45547	-5.91231	0.000502789	0.00233624	-0.332054	FBgn0000377	crn
0.925101	2.46432	5.91134	0.000503298	0.00233739	-0.341032	FBgn0067783	att-ORFA
1.51997	3.61516	5.90947	0.000504285	0.00234076	-0.510017	FBgn0039873	Smvt
0.588399	7.05505	5.9043	0.000507017	0.00235222	-0.60601	FBgn0028331	l(1)G0289
-0.669566	2.93254	-5.90196	0.000508259	0.00235676	-0.426643	FBgn0015038	Cyp9b1
0.756373	5.80033	5.89417	0.00051242	0.00237482	-0.657385	FBgn0010053	Jheh1
-0.627498	10.292	-5.89343	0.00051282	0.00237545	-0.503123	FBgn0086472	RpS25
-0.940648	1.85893	-5.89052	0.000514387	0.00238147	-0.242596	FBgn0032864	CG2493
-1.89998	0.306878	-5.88838	0.00051554	0.00238557	0.0911966	FBgn0053508	ppk13
0.599972	3.90285	5.88637	0.000516628	0.00238814	-0.588112	FBgn0035540	Syx17
-0.81351	8.47316	-5.88304	0.000518434	0.00239524	-0.577206	FBgn0003274	RpLP2
-0.795801	2.57496	-5.8812	0.000519432	0.00239862	-0.387063	FBgn0035923	CG6511
0.551012	7.20808	5.87963	0.000520291	0.00240135	-0.629104	FBgn0041156	exex
-1.09409	0.696171	-5.87558	0.000522507	0.0024087	-0.0262823	FBgn0035838	ldbr
-0.820222	2.63417	-5.8748	0.000522934	0.0024087	-0.404127	FBgn0259985	Mppe
-1.12338	0.70521	-5.87475	0.000522962	0.0024087	-0.0275329	FBgn0052590	CG32590
0.596489	7.11048	5.87407	0.000523334	0.00240917	-0.63898	FBgn0036762	CG7430
0.545359	5.79505	5.87283	0.000524019	0.00241108	-0.682752	FBgn0037607	CG8036
-0.687378	3.93736	-5.87233	0.000524289	0.00241108	-0.599757	FBgn0038862	Ubpy
0.647502	5.39991	5.86993	0.000525617	0.00241352	-0.690245	FBgn0011674	insc
-0.712725	2.8231	-5.86967	0.000525758	0.00241352	-0.444843	FBgn0029937	CG8300
-1.27769	0.107372	-5.86936	0.000525932	0.00241352	0.0803665	FBgn0031413	CG9967
0.795733	3.0411	5.86899	0.000526131	0.00241352	-0.489127	FBgn0052251	Claspin
-0.779644	4.19178	-5.86893	0.00052617	0.00241352	-0.627477	FBgn0034061	CG8386
0.771704	5.17879	5.86507	0.000528304	0.00242207	-0.693776	FBgn0085408	Shroom
1.19015	4.67681	5.86314	0.000529376	0.00242574	-0.67191	FBgn0050277	Oatp58Da
0.585235	3.68183	5.85966	0.000531319	0.0024334	-0.593133	FBgn0016131	Cdk4
0.722601	7.71845	5.85329	0.00053489	0.00244802	-0.641494	FBgn0259740	CG42394
1.30634	0.580389	5.85299	0.00053506	0.00244802	-0.0399335	FBgn0004107	Cdk2
0.546511	5.04649	5.85164	0.00053582	0.00244843	-0.708743	FBgn0021764	sdk
0.583897	7.45531	5.85147	0.000535915	0.00244843	-0.653069	FBgn0263106	DnaJ-1
-0.830191	2.29716	-5.85137	0.000535973	0.00244843	-0.371053	FBgn0001990	wek
-0.760999	2.07548	-5.85075	0.000536322	0.00244843	-0.333022	FBgn0034962	MAN1
0.878106	3.96102	5.8504	0.000536519	0.00244843	-0.633246	FBgn0023531	CG32809
0.646241	4.64294	5.8488	0.000537427	0.00245103	-0.695003	FBgn0031948	CG7149
-0.764888	2.24971	-5.84805	0.00053785	0.00245103	-0.367767	FBgn0035713	velo
-0.636417	4.09367	-5.84794	0.000537911	0.00245103	-0.64542	FBgn0036000	CG3434
0.778001	6.82343	5.84546	0.00053932	0.0024544	-0.682557	FBgn0036770	Prestin
0.936144	1.69535	5.84538	0.000539363	0.0024544	-0.275319	FBgn0038404	CG8925
0.730626	2.44043	5.84518	0.000539474	0.0024544	-0.41582	FBgn0040507	ACXD
1.71431	1.31131	5.84408	0.000540104	0.00245602	-0.179892	FBgn0031907	CG5171
-1.42547	-0.416253	-5.84348	0.000540442	0.0024563	0.138724	FBgn0031874	CG13775
-0.860352	2.42496	-5.84173	0.000541438	0.00245958	-0.404272	FBgn0250907	Cht3
-0.627029	3.95023	-5.8408	0.000541973	0.00246076	-0.639028	FBgn0266282	jnj
-1.88286	-0.432511	-5.84031	0.000542254	0.00246079	0.150291	FBgn0262613	CG43139
0.806508	3.34587	5.83929	0.000542836	0.00246218	-0.569296	FBgn0086608	CG34112
1.03416	1.45609	5.83727	0.000543993	0.00246618	-0.237134	FBgn0034262	swi2
1.14896	0.69428	5.83616	0.000544627	0.0024678	-0.0856904	FBgn0265575	yin
0.747434	5.82449	5.83567	0.000544913	0.00246784	-0.724768	FBgn0032845	CG10747
-0.51252	6.37559	-5.83473	0.000545451	0.00246903	-0.709964	FBgn0039118	CG10208
0.540486	5.89912	5.8341	0.000545814	0.00246942	-0.725636	FBgn0046687	Tre1
0.706327	3.75556	5.83267	0.00054664	0.0024715	-0.632471	FBgn0038419	CG14879
-0.930105	2.00534	-5.83234	0.000546827	0.0024715	-0.336982	FBgn0028982	Spt6
0.660282	6.60099	5.82984	0.000548272	0.00247678	-0.708817	FBgn0036663	CG9674
-0.900415	1.9907	-5.82636	0.000550287	0.00248463	-0.3417	FBgn0035591	CG4611
-0.662852	3.21099	-5.82415	0.000551575	0.00248919	-0.56034	FBgn0026402	NiPp1
0.542669	7.58709	5.82306	0.000552212	0.00249081	-0.681481	FBgn0015286	Rala
0.817603	7.77272	5.82057	0.000553665	0.0024961	-0.677405	FBgn0035904	GstO3
1.34838	-0.193966	5.81942	0.000554339	0.00249788	0.0641834	FBgn0039593	CG9989
0.507938	5.91364	5.81631	0.000556165	0.00250484	-0.746057	FBgn0016797	fz2
0.604303	6.86266	5.8145	0.000557229	0.00250837	-0.717117	FBgn0052451	SPoCk
0.920689	1.26026	5.80853	0.000560758	0.00252299	-0.234646	FBgn0017577	Mcm5
-0.53968	6.45997	-5.80698	0.000561675	0.00252584	-0.739554	FBgn0015834	Trip1
0.607541	6.52226	5.80634	0.000562055	0.00252628	-0.739077	FBgn0027582	CG6230
1.48377	-0.519699	5.80543	0.000562597	0.00252744	0.102292	FBgn0038181	CG9297
-0.563072	4.63882	-5.80405	0.000563421	0.00252988	-0.740942	FBgn0005642	wdn
-0.766736	2.56372	-5.80352	0.000563736	0.00253002	-0.475619	FBgn0039544	CG12877
-0.794882	1.81892	-5.80266	0.000564248	0.00253105	-0.339948	FBgn0040964	CG18661
0.541024	4.44966	5.80021	0.000565715	0.00253635	-0.739963	FBgn0260971	CG42594
-0.986721	2.81035	-5.79914	0.00056636	0.00253797	-0.516541	FBgn0062978	CG31808
0.73096	2.51799	5.79664	0.000567861	0.00254223	-0.485593	FBgn0085412	CG34383
0.618363	4.64138	5.79661	0.000567878	0.00254223	-0.756031	FBgn0027564	CG3149
-1.20905	2.31741	-5.79572	0.000568415	0.00254336	-0.426908	FBgn0022943	Cbp20
0.983171	2.66834	5.79336	0.000569837	0.00254845	-0.511819	FBgn0039916	CG9935
-0.724876	2.8828	-5.79264	0.000570273	0.00254912	-0.543488	FBgn0004856	Bx42
0.874341	1.51901	5.79185	0.000570747	0.00254996	-0.304328	FBgn0020633	Mcm7
2.56615	0.0196922	5.79091	0.000571319	0.00255125	0.0361225	FBgn0030508	CG15760
0.775336	5.06468	5.78963	0.000572093	0.00255342	-0.779237	FBgn0020235	ATPsyn-gamma
-0.868956	1.54291	-5.78735	0.000573476	0.00255822	-0.302867	FBgn0050443	Opbp
1.92268	-0.921779	5.78692	0.000573738	0.00255822	0.14357	FBgn0037519	CG3014
-0.593285	3.69676	-5.78359	0.00057577	0.00256599	-0.676653	FBgn0263863	mRpL45
-0.631017	3.72552	-5.78278	0.000576263	0.00256691	-0.680377	FBgn0030793	CG9125
-0.934908	1.40364	-5.7815	0.000577051	0.0025679	-0.280098	FBgn0037667	CG16734
-1.14977	0.813598	-5.78148	0.000577059	0.0025679	-0.153384	FBgn0031238	CG3645
0.706947	3.50717	5.77282	0.000582391	0.0025894	-0.670661	FBgn0013279	Hsp70Bc
0.871784	7.24325	5.77269	0.00058247	0.0025894	-0.752314	FBgn0052687	CG32687
-0.767647	2.83471	-5.77033	0.000583933	0.00259461	-0.560457	FBgn0038272	CG7265
-0.694347	2.74399	-5.76668	0.000586202	0.00260303	-0.551548	FBgn0039861	pasha
0.782035	2.15244	5.76635	0.000586411	0.00260303	-0.454073	FBgn0024991	CG2694
-0.735812	5.06474	-5.76583	0.000586732	0.00260317	-0.800643	FBgn0034527	CG9945
-0.938473	1.72627	-5.76408	0.000587828	0.00260674	-0.362839	FBgn0040899	CG17776
0.57318	5.13687	5.76331	0.000588309	0.00260758	-0.81321	FBgn0037336	CG2519
-0.560796	9.16744	-5.75957	0.000590653	0.00261667	-0.694325	FBgn0010198	RpS15Aa
-1.07085	0.937029	-5.75756	0.000591917	0.00262088	-0.208897	FBgn0262166	calypso
0.592703	7.14317	5.75677	0.000592415	0.00262088	-0.774531	FBgn0263112	Mitf
1.42431	-0.137965	5.75666	0.000592483	0.00262088	-0.0138176	FBgn0039058	VhaAC39-2
-0.957857	1.20083	-5.75502	0.000593523	0.00262347	-0.268967	FBgn0033737	Nup54
-1.50812	0.291303	-5.75481	0.000593656	0.00262347	-0.0720947	FBgn0031575	Cep97
-1.69168	-1.01062	-5.75276	0.000594948	0.00262788	0.121776	FBgn0003482	spn-D
0.545067	5.16424	5.75221	0.000595296	0.00262812	-0.82678	FBgn0262127	kibra
-0.645073	3.75012	-5.74732	0.000598407	0.00263844	-0.724681	FBgn0036915	Prp3
1.83981	-0.894164	5.74714	0.00059852	0.00263844	0.0952202	FBgn0005390	fs(1)M3
-0.549273	5.51905	-5.74627	0.000599077	0.0026396	-0.831115	FBgn0028969	deltaCOP
-0.767543	2.02792	-5.74515	0.000599796	0.00264146	-0.446318	FBgn0261882	l(2)35Bc
-1.04596	1.53283	-5.74424	0.000600374	0.00264271	-0.344799	FBgn0030291	CG1738
-0.951995	1.12193	-5.74125	0.000602292	0.00264804	-0.269124	FBgn0028897	CG4935
0.769852	2.64204	5.74119	0.00060233	0.00264804	-0.57154	FBgn0038223	Afti
0.699926	8.01244	5.74097	0.000602475	0.00264804	-0.761639	FBgn0025865	Cortactin
-1.36137	0.315482	-5.73861	0.000603988	0.00265293	-0.100124	FBgn0031309	Tfb4
-2.04735	-1.90682	-5.73824	0.000604232	0.00265293	0.187478	FBgn0036849	CG14079
-0.66046	9.68567	-5.73786	0.000604476	0.00265293	-0.702005	FBgn0000559	EF2
0.637614	7.04211	5.73588	0.00060575	0.00265721	-0.802682	FBgn0015591	AstA
1.4533	0.313381	5.73474	0.00060649	0.00265916	-0.119104	FBgn0051646	CG31646
0.521489	5.66616	5.73087	0.000608998	0.00266885	-0.851021	FBgn0013334	Sap47
0.526322	4.82934	5.7303	0.000609371	0.00266899	-0.843891	FBgn0035482	CG14985
0.517935	4.35482	5.7299	0.000609629	0.00266899	-0.814966	FBgn0261563	wb
-1.27742	0.457368	-5.72919	0.000610094	0.00266972	-0.140208	FBgn0040849	Ir41a
-0.63532	2.99285	-5.72836	0.000610632	0.00267077	-0.638804	FBgn0031054	Ssu72
-0.581304	8.68072	-5.72762	0.000611116	0.00267158	-0.750457	FBgn0011284	RpS4
0.619037	2.97821	5.72707	0.000611477	0.00267185	-0.646452	FBgn0037734	trbd
-0.780955	3.11903	-5.72627	0.000612	0.00267283	-0.657539	FBgn0037566	mRpL1
-0.673611	3.37983	-5.72517	0.000612721	0.00267467	-0.70064	FBgn0030486	Set2
0.803396	8.66056	5.72363	0.00061373	0.00267752	-0.755972	FBgn0053113	Rtnl1
0.951753	4.23679	5.72319	0.000614015	0.00267752	-0.808307	FBgn0040730	CG15127
-0.95573	1.80645	-5.7228	0.000614273	0.00267752	-0.425705	FBgn0034940	CG16787
0.611466	5.8909	5.72093	0.000615501	0.0026815	-0.858183	FBgn0052850	CG32850
-1.07966	0.848628	-5.7205	0.000615786	0.0026815	-0.233424	FBgn0037312	CG11999
-1.4436	1.26604	-5.71788	0.000617511	0.00268771	-0.304382	FBgn0050349	CG30349
1.47453	1.88221	5.71652	0.000618408	0.0026903	-0.446971	FBgn0046258	CG12880
-0.659343	2.90372	-5.71372	0.000620264	0.00269575	-0.640896	FBgn0033153	Gadd45
0.730251	3.10685	5.71168	0.000621623	0.00270034	-0.683659	FBgn0085383	CG34354
-0.654674	7.07226	-5.711	0.000622072	0.00270098	-0.830982	FBgn0051446	CG31446
0.815676	6.40721	5.70913	0.000623322	0.00270369	-0.856696	FBgn0037757	CG8516
0.882894	9.23925	5.70898	0.00062342	0.00270369	-0.750868	FBgn0021872	Xbp1
0.532107	4.25856	5.7087	0.000623603	0.00270369	-0.83181	FBgn0001108	Gl
0.773161	1.90898	5.70708	0.000624685	0.00270597	-0.477935	FBgn0038511	CG5873
-0.782776	1.9652	-5.70701	0.000624735	0.00270597	-0.478692	FBgn0036291	CG10681
-0.616593	4.29019	-5.70572	0.000625597	0.00270755	-0.83044	FBgn0032634	Rpb11
0.653125	3.52883	5.70556	0.000625705	0.00270755	-0.752957	FBgn0263258	chas
-0.926827	1.68547	-5.70334	0.000627192	0.00271268	-0.426134	FBgn0035537	CG11342
0.617456	7.3101	5.70213	0.000628008	0.00271489	-0.832958	FBgn0020622	Pi3K21B
-0.646602	2.84384	-5.69956	0.000629743	0.00272107	-0.647902	FBgn0266917	CG16941
-0.679676	2.67562	-5.69599	0.000632155	0.00273018	-0.622707	FBgn0032016	CG7818
[truncated: 11,266 more rows]

## Sheet: trx-RNAi FDR <0.05
LogFC	AveExpr	t	PValue	FDR	B	geneID	symbol
5.3967	1.95892	4.17025	0.00380496	0.0105838	-2.14246	FBgn0262608	CG43134
5.32924	-0.762452	12.5387	3.30721e-06	0.000115947	4.95294	FBgn0030437	hec
4.15732	2.1222	17.5663	3.02072e-07	3.69934e-05	7.63443	FBgn0051091	CG31091
4.09481	2.26484	20.1478	1.12885e-07	2.14721e-05	8.57295	FBgn0038063	Octbeta2R
3.96806	-0.434407	7.85874	8.1031e-05	0.00068668	2.13639	FBgn0000451	ect
3.90287	-1.17944	8.18233	6.19767e-05	0.000589142	2.39451	FBgn0034429	CG18607
3.90263	-1.68849	8.68851	4.14512e-05	0.00046213	2.74518	FBgn0036017	CG3280
3.64762	1.00774	8.94571	3.40429e-05	0.000407871	2.91773	FBgn0030763	CG9782
3.33933	-1.11078	9.6796	1.99116e-05	0.000296525	3.46708	FBgn0031690	CG7742
3.32194	3.62451	26.5747	1.5283e-08	7.46998e-06	10.5877	FBgn0038461	CG3678
3.29191	-0.78042	11.3712	6.55012e-06	0.000162819	4.51188	FBgn0000071	Ama
3.25753	-1.55026	5.29295	0.000984148	0.00383102	-0.31608	FBgn0052279	Drsl2
3.17246	-0.483089	11.8497	4.91357e-06	0.000139896	4.81516	FBgn0085480	CG34451
3.1421	-0.71341	9.7541	1.8894e-05	0.000290523	3.5496	FBgn0033132	Tsp42Ej
3.1164	1.28055	13.3073	2.1759e-06	9.77513e-05	5.69664	FBgn0261262	CG42613
3.09771	2.96641	24.5612	2.70348e-08	8.23038e-06	10.0125	FBgn0015721	ktub
3.04429	-1.63188	6.71348	0.00022603	0.00135436	1.14861	FBgn0032615	CG6012
3.04147	0.862214	7.84905	8.16955e-05	0.000689357	1.99032	FBgn0051106	CG31106
3.02965	2.18762	16.6025	4.52259e-07	4.50658e-05	7.25479	FBgn0050026	CG30026
2.95882	-2.58489	4.77356	0.0017986	0.00599981	-0.876432	FBgn0034725	CG6044
2.83544	2.13009	9.90748	1.69784e-05	0.000272999	3.4749	FBgn0010044	GstD8
2.80809	1.9411	15.9784	5.94461e-07	5.42294e-05	6.98328	FBgn0264753	Rgk1
2.73229	3.88499	12.1384	4.15194e-06	0.000128954	4.78635	FBgn0031945	CG7191
2.71058	5.79746	16.9919	3.83198e-07	4.17779e-05	7.28138	FBgn0031689	Cyp28d1
2.64428	5.46322	18.2114	2.33287e-07	3.31628e-05	7.81376	FBgn0035743	CG15829
2.63205	0.614388	11.7194	5.30814e-06	0.000144685	4.8149	FBgn0035260	CG7991
2.63039	4.0611	25.9361	1.82273e-08	7.46998e-06	10.447	FBgn0267727	Pen
2.62603	2.25817	9.79058	1.84173e-05	0.000286492	3.36096	FBgn0036713	Mip
2.61683	0.826715	13.0026	2.56164e-06	0.000104878	5.53465	FBgn0051313	CG31313
2.61115	4.05805	7.45025	0.000115161	0.000857235	1.11051	FBgn0050360	Mal-A6
2.60517	3.37338	15.3756	7.81763e-07	6.13067e-05	6.62108	FBgn0000079	Amy-p
2.60021	4.6077	21.1804	7.87613e-08	1.63529e-05	8.96897	FBgn0038147	CCHa2
2.5944	-0.809929	2.92772	0.0210457	0.0414772	-3.59431	FBgn0030624	CG9106
2.57254	-0.500651	7.32269	0.000128927	0.000924976	1.64829	FBgn0034137	CG4945
2.57187	2.73633	21.001	8.374e-08	1.66363e-05	8.92836	FBgn0010314	Cks30A
2.56957	-2.41292	4.52729	0.00242633	0.00749138	-1.17505	FBgn0033135	Tsp42En
2.56615	0.0196922	5.79091	0.000571319	0.00255125	0.0361225	FBgn0030508	CG15760
2.55643	4.69453	18.2904	2.26149e-07	3.31438e-05	7.86257	FBgn0016032	lbm
2.53916	5.19315	22.0546	5.88377e-08	1.31502e-05	9.26067	FBgn0031126	Cyp6v1
2.52998	-0.285705	9.05535	3.1348e-05	0.000386809	3.06414	FBgn0014343	mirr
2.51574	4.82336	15.7179	6.68343e-07	5.74518e-05	6.70024	FBgn0062412	Ctr1B
2.50608	-0.262733	8.45669	4.97117e-05	0.00051319	2.60012	FBgn0031646	CG2837
2.49394	0.106106	10.6441	1.03607e-05	0.000205958	4.15597	FBgn0010109	dpn
2.48474	1.48554	8.82588	3.7291e-05	0.000435792	2.71167	FBgn0027608	CG2082
2.46199	-0.265085	9.99323	1.60035e-05	0.000264457	3.72829	FBgn0033521	CG12896
2.45945	1.90491	4.42287	0.00276215	0.00828646	-2.03376	FBgn0033047	CG7882
2.4425	1.0247	12.3182	3.74552e-06	0.000125412	5.15364	FBgn0031861	CG17375
2.39733	6.63311	23.2523	4.01656e-08	9.64048e-06	9.65158	FBgn0031741	CG11034
2.37718	-1.88307	4.92918	0.00149536	0.00521859	-0.723604	FBgn0050293	Cht12
2.36435	5.1902	23.1879	4.09774e-08	9.64048e-06	9.63156	FBgn0032946	nrv3
2.34364	1.03146	10.9824	8.34178e-06	0.000183745	4.33536	FBgn0034507	CG11192
2.34211	0.979682	6.46726	0.000286748	0.00157272	0.597649	FBgn0013772	Cyp6a8
2.32765	1.29704	12.2989	3.78707e-06	0.000125957	5.12774	FBgn0030348	CG10352
2.32573	0.25664	10.9686	8.41469e-06	0.000183745	4.36046	FBgn0004872	piwi
2.31788	2.10853	10.1901	1.39947e-05	0.000244361	3.66486	FBgn0039464	CG6330
2.31371	-0.874731	8.00462	7.17284e-05	0.000636162	2.25669	FBgn0004514	Oct-TyrR
2.29073	0.859614	10.8759	8.92528e-06	0.000190434	4.27685	FBgn0003892	ptc
2.28098	0.955155	12.6367	3.1312e-06	0.000111206	5.33436	FBgn0259736	CG42390
2.28061	-2.06023	4.65339	0.00207922	0.0066928	-1.04051	FBgn0039816	CG11317
2.26586	0.0685817	4.19469	0.00368732	0.010324	-1.9652	FBgn0032067	CG9465
2.26182	3.11999	13.1563	2.35815e-06	9.99141e-05	5.45651	FBgn0037714	CG9396
2.24019	2.46489	15.4599	7.51931e-07	6.06753e-05	6.71846	FBgn0026602	Ady43A
2.23065	0.74953	7.9982	7.21114e-05	0.000638206	2.10583	FBgn0261575	tobi
2.22784	3.78338	11.1638	7.44471e-06	0.000173934	4.13904	FBgn0026439	Eaat1
2.21425	-1.27312	6.83695	0.000201103	0.00124161	1.24585	FBgn0029147	NtR
2.20791	1.74401	12.5256	3.33156e-06	0.000116344	5.22376	FBgn0032683	kon
2.18422	6.05475	13.4745	1.99245e-06	9.29891e-05	5.48891	FBgn0051104	CG31104
2.17151	0.924877	3.63963	0.00769134	0.0183704	-2.93072	FBgn0032022	CG14275
2.16338	6.40123	24.5156	2.74006e-08	8.23038e-06	10.0406	FBgn0037976	Tk
2.15076	6.30349	11.9838	4.54171e-06	0.000134893	4.58858	FBgn0035355	CG16985
2.14492	2.54117	6.24963	0.00035586	0.00181794	0.0635445	FBgn0036155	CG6163
2.14359	-1.39468	5.58708	0.000710982	0.00298552	-0.0213369	FBgn0036789	AstC-R2
2.13981	4.4673	9.20307	2.80887e-05	0.000361314	2.61618	FBgn0263235	Phae2
2.13744	3.16064	18.412	2.15659e-07	3.26779e-05	7.97095	FBgn0000405	CycB
2.13454	-1.84961	4.64082	0.00211124	0.00676989	-1.08157	FBgn0038733	CG11407
2.12902	4.93748	16.0483	5.76239e-07	5.35011e-05	6.84697	FBgn0004842	RYa-R
2.11995	-1.90164	3.77096	0.00643671	0.0160023	-2.21009	FBgn0026077	Gasp
2.11826	2.13949	13.9338	1.57221e-06	8.53e-05	5.97242	FBgn0040232	cmet
2.11519	1.5451	13.5253	1.94016e-06	9.25469e-05	5.79431	FBgn0000140	asp
2.11427	1.18695	12.855	2.77597e-06	0.000105605	5.44686	FBgn0031417	CG3597
2.10972	1.57859	13.2115	2.28964e-06	9.92201e-05	5.62246	FBgn0042110	CG18765
2.09906	3.9612	16.5952	4.53682e-07	4.50658e-05	7.14628	FBgn0003124	polo
2.09555	-3.01713	3.51531	0.00912446	0.0210619	-2.46712	FBgn0051374	sals
2.09492	0.743157	4.4939	0.00252859	0.00772773	-1.7085	FBgn0039594	CG9990
2.07323	1.50459	10.39	1.22422e-05	0.000228012	3.87854	FBgn0085426	Rgk3
2.07251	-1.08172	6.04288	0.000439116	0.0021038	0.438821	FBgn0013725	phyl
2.06135	1.86058	13.2333	2.26315e-06	9.92201e-05	5.61367	FBgn0034143	CG8303
2.05811	3.9811	21.1169	8.0484e-08	1.63529e-05	8.95539	FBgn0039075	CG4393
2.05204	-0.235105	7.68836	9.36546e-05	0.000751119	1.94407	FBgn0034070	SP2353
2.0434	-1.79275	5.67374	0.000647432	0.00277604	0.106017	FBgn0036414	nan
2.03797	6.52769	6.63366	0.000243978	0.0014191	0.187858	FBgn0022700	Cht4
2.03376	4.23931	13.3684	2.10666e-06	9.54329e-05	5.47332	FBgn0004431	LysX
2.03287	1.88924	14.5511	1.15648e-06	7.3326e-05	6.30452	FBgn0010105	comm
2.02768	0.237382	4.85692	0.00162851	0.00556201	-1.13831	FBgn0033365	CG8170
2.018	4.40204	14.3115	1.30095e-06	7.60164e-05	5.98644	FBgn0031800	CG9497
2.01592	5.61163	6.42943	0.000297601	0.00161246	-0.0433001	FBgn0002570	Mal-A1
2.01575	1.89244	11.1083	7.70725e-06	0.000176674	4.32033	FBgn0027500	spd-2
2.01151	0.403267	8.22165	6.00265e-05	0.000577029	2.33753	FBgn0002592	E(spl)m2-BFM
2.00238	-0.804946	5.46322	0.000814164	0.00330847	-0.232457	FBgn0036150	Ir68a
2.00098	4.66157	5.47355	0.000804956	0.00328677	-1.10922	FBgn0033296	Mal-A7
1.99008	2.10177	11.9348	4.67379e-06	0.000136996	4.82703	FBgn0261089	Sytalpha
1.98223	-1.81209	4.80795	0.00172617	0.00582117	-0.8829	FBgn0037107	CG7166
1.97869	2.57115	12.2845	3.81816e-06	0.000125957	4.99052	FBgn0034784	CG9826
1.97783	-1.18321	4.66791	0.00204289	0.00659567	-1.13555	FBgn0259791	bora
1.97502	4.53801	14.2719	1.32677e-06	7.65246e-05	5.95684	FBgn0051719	RluA-1
1.96489	2.33382	13.8946	1.60388e-06	8.53491e-05	5.93319	FBgn0036742	CG7497
1.96258	-0.747551	6.10103	0.000413692	0.00201878	0.461799	FBgn0052406	PVRAP
1.96185	4.8027	21.7134	6.58421e-08	1.43568e-05	9.14363	FBgn0023534	CG17778
1.96184	0.377817	7.53282	0.000107131	0.000817197	1.7306	FBgn0004133	blow
1.95195	-0.633541	6.80542	0.000207163	0.00126852	1.16315	FBgn0040261	Ugt36Bb
1.95154	1.10456	10.7984	9.37848e-06	0.000194892	4.19895	FBgn0036544	sff
1.92491	-1.32144	5.58491	0.000712661	0.00298976	-0.034032	FBgn0039225	Ets96B
1.92268	-0.921779	5.78692	0.000573738	0.00255822	0.14357	FBgn0037519	CG3014
1.92251	-1.29372	6.16875	0.000386131	0.00191778	0.587271	FBgn0034552	CG17999
1.91652	4.95677	15.1876	8.53272e-07	6.25267e-05	6.41821	FBgn0000463	Dl
1.89496	1.22093	4.24982	0.00343628	0.0097649	-2.15294	FBgn0085313	CG34284
1.89039	6.86294	16.3789	4.98225e-07	4.82331e-05	7.00313	FBgn0036381	CG8745
1.88452	4.63983	10.3513	1.25614e-05	0.000232986	3.48627	FBgn0032839	CG10659
1.87584	2.25091	9.39585	2.43947e-05	0.000328446	3.02964	FBgn0032105	borr
1.87062	-1.2447	4.82541	0.00169063	0.0057295	-0.933403	FBgn0040318	HGTX
1.86778	-0.783971	5.32323	0.00095124	0.0037315	-0.400783	FBgn0261928	CG42795
1.86391	3.93225	17.4586	3.15671e-07	3.81365e-05	7.52805	FBgn0015396	jumu
1.85949	0.152514	3.64963	0.00758703	0.0181991	-2.76236	FBgn0085232	CG34203
1.84728	6.02343	14.7731	1.03868e-06	7.08836e-05	6.19527	FBgn0036320	CG10943
1.84552	4.10889	14.189	1.38265e-06	7.82505e-05	5.93389	FBgn0038083	CG5999
1.83981	-0.894164	5.74714	0.00059852	0.00263844	0.0952202	FBgn0005390	fs(1)M3
1.83137	7.07901	18.5551	2.04004e-07	3.20652e-05	7.96015	FBgn0003118	pnt
1.82971	1.90971	11.3064	6.81577e-06	0.000166484	4.4439	FBgn0034741	CG4269
1.82919	-0.0998092	7.36058	0.000124655	0.000905807	1.62881	FBgn0002633	E(spl)m7-HLH
1.82819	-0.000355729	4.46997	0.00260474	0.00790976	-1.59991	FBgn0263994	CG43737
1.82137	5.05719	14.9726	9.44277e-07	6.59518e-05	6.30362	FBgn0250876	Sema-5c
1.81929	-0.440667	5.68466	0.000639885	0.00274912	-0.0371345	FBgn0034135	Syn2
1.8181	-0.280776	4.05838	0.00439818	0.0118935	-2.09927	FBgn0037412	Osi4
1.81804	6.19788	14.2834	1.31924e-06	7.65246e-05	5.93727	FBgn0034247	CG6484
1.81635	-1.00206	5.46045	0.000816659	0.0033171	-0.213684	FBgn0034288	CG5084
1.8134	6.41665	14.5909	1.13429e-06	7.28007e-05	6.10514	FBgn0025456	CREG
1.81257	-1.98423	3.57125	0.00844685	0.0198128	-2.47975	FBgn0033358	CG8216
1.80079	0.119378	5.22748	0.00105968	0.00404851	-0.667641	FBgn0028699	Rh50
1.79976	0.918177	5.55981	0.000732388	0.00305389	-0.42634	FBgn0017448	CG2187
1.79646	-2.31763	3.03024	0.0181339	0.0368281	-3.20036	FBgn0004622	TkR99D
1.79606	3.8694	18.3467	2.21219e-07	3.29616e-05	7.90514	FBgn0038680	Cyp12a5
1.79176	6.93851	14.506	1.18221e-06	7.33957e-05	6.07089	FBgn0262624	Tmhs
1.79132	2.44365	11.2614	7.00758e-06	0.000168908	4.34893	FBgn0032900	CG14401
1.79013	1.28307	9.88092	1.72939e-05	0.000276084	3.53181	FBgn0260932	cuff
1.78824	4.34406	12.8608	2.76718e-06	0.000105605	5.16271	FBgn0002673	twe
1.77984	-0.0292734	6.3226	0.000330806	0.00172746	0.59396	FBgn0052105	CG32105
1.77904	-1.30184	5.43989	0.000835407	0.00337028	-0.201594	FBgn0037727	CG8358
1.77379	1.34063	6.62866	0.000245154	0.00142277	0.673409	FBgn0035300	CG1139
1.76461	-1.29825	5.01236	0.00135673	0.00487663	-0.700826	FBgn0037697	GstZ2
1.75123	1.7178	11.3985	6.44166e-06	0.000162605	4.52358	FBgn0037635	CG9837
1.74944	0.425083	6.9463	0.000181573	0.00115371	1.15866	FBgn0036731	CG6333
1.74942	6.00209	7.83854	8.24234e-05	0.000692543	1.37678	FBgn0039310	CG11878
1.74346	1.7912	6.72293	0.000224005	0.00134493	0.685879	FBgn0054040	CG34040
1.74296	-0.0453624	7.73585	8.99277e-05	0.000734884	1.96065	FBgn0002466	sti
1.73938	4.62233	11.4282	6.32586e-06	0.000160904	4.23914	FBgn0036152	CG6175
1.73415	-1.07987	4.36957	0.00295291	0.00871253	-1.53879	FBgn0039897	CG1674
1.73311	1.52544	10.9079	8.74495e-06	0.000187932	4.22217	FBgn0259927	CG42450
1.73205	5.68731	13.9991	1.52105e-06	8.44606e-05	5.77636	FBgn0031732	CG11149
1.73057	0.74635	4.22546	0.00354484	0.0100066	-2.08867	FBgn0038354	CG5404
1.72992	0.811393	6.53365	0.000268752	0.00150636	0.671849	FBgn0037563	CG11672
1.72884	0.793446	8.59605	4.45451e-05	0.000480958	2.59392	FBgn0085424	nub
1.72593	3.53641	17.0078	3.80644e-07	4.17779e-05	7.3518	FBgn0038608	WRNexo
1.7184	-1.33968	4.69664	0.00197302	0.00641176	-1.08238	FBgn0032233	dpr19
1.71742	2.53677	13.6734	1.79654e-06	8.97667e-05	5.79096	FBgn0003525	stg
1.71431	1.31131	5.84408	0.000540104	0.00245602	-0.179892	FBgn0031907	CG5171
1.71315	2.62985	13.773	1.7067e-06	8.71881e-05	5.83644	FBgn0031939	CG13796
1.71182	-1.3974	5.66829	0.000651241	0.0027897	0.0624291	FBgn0034788	CG13532
1.70612	1.9558	12.7082	3.00949e-06	0.000110266	5.30092	FBgn0004106	Cdk1
1.69925	7.96454	8.08019	6.73849e-05	0.000612839	1.6594	FBgn0034663	CG4363
1.69399	1.33081	8.28875	5.68553e-05	0.000554292	2.25197	FBgn0041605	cpx
1.6914	5.59664	14.8469	1.00256e-06	6.89454e-05	6.22959	FBgn0015575	alpha-Est7
1.68989	2.53062	10.2443	1.34936e-05	0.000238405	3.62657	FBgn0034047	CG12970
1.68737	0.704718	7.32899	0.000128206	0.000924883	1.48242	FBgn0051345	CG31345
1.68677	-1.17459	5.28219	0.00099614	0.00386691	-0.399151	FBgn0038725	CG6184
1.68032	7.61142	13.2051	2.29738e-06	9.92201e-05	5.36608	FBgn0003716	tkv
1.67136	-0.711236	5.08246	0.00125088	0.00458502	-0.702012	FBgn0004878	cas
1.66887	1.15245	4.3172	0.00315447	0.00916509	-2.05603	FBgn0032025	CG7778
1.66737	1.06697	6.13232	0.000400694	0.00197475	0.191017	FBgn0031546	CG8851
1.66563	1.12968	8.44405	5.02124e-05	0.000516431	2.41554	FBgn0034013	unc-5
1.65906	0.978809	3.22137	0.0137839	0.0295298	-3.58577	FBgn0016650	Lgr1
1.65691	-0.74001	6.05323	0.000434469	0.00208825	0.404732	FBgn0038839	CG10830
1.65198	0.15751	7.4058	0.000119762	0.000881174	1.63433	FBgn0040477	cid
1.64907	7.01235	16.5022	4.72245e-07	4.63942e-05	7.06327	FBgn0031294	IA-2
1.64808	4.58485	10.338	1.2673e-05	0.000233086	3.47306	FBgn0005664	Cry
1.64795	0.000784173	7.59842	0.000101199	0.000786713	1.83062	FBgn0036040	CG6749
1.64684	7.02798	16.8946	3.99262e-07	4.22242e-05	7.2436	FBgn0051233	CG31233
1.64619	5.98755	15.8335	6.34336e-07	5.55977e-05	6.72763	FBgn0040250	Ugt86Dj
1.63912	1.26883	8.89131	3.54761e-05	0.000421751	2.76539	FBgn0038492	Mur89F
1.63519	-1.68787	3.40102	0.010697	0.0240099	-2.77106	FBgn0037520	CG18268
1.63263	1.28326	7.85866	8.10364e-05	0.00068668	1.87628	FBgn0002878	mus101
1.62894	-0.827803	4.99007	0.00139244	0.00497211	-0.797246	FBgn0030170	CG2990
1.62794	4.28684	15.5437	7.23542e-07	5.95468e-05	6.61771	FBgn0038082	CG5724
1.6267	1.4085	8.34486	5.43472e-05	0.00054045	2.2851	FBgn0037292	CG2022
1.62404	3.75619	10.8556	9.04141e-06	0.000191821	3.91055	FBgn0035578	CG13707
1.6159	0.808572	3.33359	0.011759	0.0259033	-3.38219	FBgn0030271	CG15202
1.60583	1.20834	4.9496	0.00145993	0.00513244	-1.23996	FBgn0015524	otp
1.60532	5.42098	3.95878	0.00501165	0.013141	-3.14637	FBgn0033789	CG13324
1.60278	-0.0549112	5.91343	0.000502203	0.00233473	0.151221	FBgn0024913	Actbeta
1.59801	2.81269	11.5307	5.94451e-06	0.000155392	4.47633	FBgn0052183	Ccn
1.59664	3.71272	13.5981	1.86804e-06	9.12582e-05	5.63357	FBgn0031533	CG2772
1.59624	-1.04501	4.11589	0.00408158	0.0111999	-1.88458	FBgn0034553	CG9993
1.59081	1.52336	10.3118	1.28967e-05	0.00023482	3.80745	FBgn0031542	CG15414
1.59066	-1.28101	4.98234	0.00140505	0.00499856	-0.742396	FBgn0004619	GluRIA
1.58448	-0.346379	5.29351	0.000983529	0.00383102	-0.511136	FBgn0033728	Cpr49Ae
1.58162	7.59139	14.0333	1.49499e-06	8.35327e-05	5.83287	FBgn0029506	Tsp42Ee
1.58081	3.48072	15.5841	7.10315e-07	5.93478e-05	6.69178	FBgn0004595	pros
1.58027	0.173232	7.70705	9.21673e-05	0.000745248	1.90572	FBgn0038261	CG14856
1.57774	7.09305	14.5103	1.17973e-06	7.33957e-05	6.07665	FBgn0034083	lbk
1.57745	-0.711959	4.56457	0.00231751	0.00724425	-1.35107	FBgn0020248	stet
1.57142	7.46342	11.0738	7.87558e-06	0.000177849	4.01166	FBgn0053265	Muc68E
1.5672	5.75056	13.9104	1.59103e-06	8.53491e-05	5.72568	FBgn0052368	CG32368
1.56423	3.67442	13.9311	1.57433e-06	8.53e-05	5.82118	FBgn0263354	CG42784
1.56421	-1.99724	4.54894	0.00236247	0.00734881	-1.18742	FBgn0005391	Yp2
1.56402	2.18884	11.1151	7.67471e-06	0.000176674	4.27774	FBgn0005586	Rab3
1.56355	6.92914	14.6351	1.11024e-06	7.19244e-05	6.13853	FBgn0004648	svr
1.56345	-1.88697	4.625	0.00215232	0.00685736	-1.1053	FBgn0003023	otu
1.56324	2.36297	9.52266	2.22639e-05	0.000310514	3.10351	FBgn0027930	MP1
1.56261	-2.32217	2.8382	0.0239902	0.046143	-3.48422	FBgn0000061	al
1.56228	-0.0825822	6.55625	0.000262919	0.0014851	0.83887	FBgn0035521	VhaM9.7-a
1.55827	7.44285	15.7314	6.6427e-07	5.74518e-05	6.70623	FBgn0015541	sda
1.55401	-1.64266	3.53974	0.00882163	0.0204898	-2.58182	FBgn0030914	CG6106
1.55392	-1.96549	3.81459	0.00607035	0.0152741	-2.15128	FBgn0037972	CG10005
1.55296	-0.635363	4.96998	0.0014255	0.00505314	-0.854453	FBgn0036202	CG6024
1.5505	1.1513	3.93717	0.00515673	0.0134345	-2.58867	FBgn0037683	CG18473
1.54663	1.64769	9.61177	2.0892e-05	0.000299436	3.27409	FBgn0037186	CG11241
1.53769	-2.35235	3.83089	0.00593938	0.0150207	-2.07832	FBgn0035649	CG10483
1.53763	0.040208	4.20937	0.00361858	0.0101634	-1.96733	FBgn0034053	Cyp4aa1
1.53532	3.75021	12.7241	2.98312e-06	0.000109784	5.12064	FBgn0262366	CG43064
1.5343	-0.763144	5.37554	0.000897238	0.0035682	-0.349656	FBgn0031692	TpnC25D
1.53007	6.62947	12.1008	4.24324e-06	0.00012947	4.66714	FBgn0033978	Cyp6a23
1.52861	2.78309	12.6443	3.11807e-06	0.000111206	5.17368	FBgn0036485	FucTA
1.5286	7.12341	12.9143	2.68748e-06	0.000105605	5.18057	FBgn0031645	CG3036
1.52659	0.282849	4.73916	0.00187442	0.00617438	-1.31649	FBgn0010114	hig
1.52432	2.82252	11.2498	7.05812e-06	0.000169623	4.28716	FBgn0050089	CG30089
1.52431	2.30322	6.08719	0.000419592	0.00203535	-0.0987131	FBgn0262794	CG43175
1.52389	3.88235	10.2866	1.31159e-05	0.000235368	3.48632	FBgn0031461	daw
1.52208	-0.955254	3.43951	0.0101371	0.022984	-2.84832	FBgn0000449	dib
1.52032	5.05278	8.50729	4.77614e-05	0.000499984	1.98236	FBgn0052695	CG32695
1.51997	3.61516	5.90947	0.000504285	0.00234076	-0.510017	FBgn0039873	Smvt
1.51939	0.115113	6.57486	0.000258219	0.00147319	0.8264	FBgn0085419	Rgk2
1.51821	0.702158	7.78732	8.60744e-05	0.000714043	1.90225	FBgn0037475	Fer1
1.51474	3.07068	13.9795	1.53619e-06	8.47747e-05	5.90262	FBgn0051481	pb
1.50898	0.621674	7.60165	0.000100917	0.000785343	1.74455	FBgn0028675	Sur
1.50853	7.31857	13.012	2.54864e-06	0.000104878	5.24408	FBgn0014009	Rab2
1.50826	6.2444	9.78255	1.8521e-05	0.000286492	3.03323	FBgn0030929	CG15043
1.5073	6.0008	12.1984	4.01113e-06	0.000128529	4.71541	FBgn0051092	LpR2
1.50674	-1.42321	4.47228	0.00259728	0.00789248	-1.35851	FBgn0033679	CG8888
1.50032	7.32667	12.9255	2.67112e-06	0.000105605	5.19303	FBgn0027571	CG3523
1.49645	1.94966	8.3316	5.49284e-05	0.000541419	2.18259	FBgn0000422	Ddc
1.49585	4.74649	13.4896	1.97673e-06	9.29891e-05	5.50291	FBgn0264707	RhoGEF3
1.49139	4.33593	10.953	8.49816e-06	0.000184402	3.92534	FBgn0031860	CG11236
1.48492	1.66543	8.88109	3.57531e-05	0.000423354	2.69211	FBgn0032840	sNPF
1.48486	8.4051	11.6909	5.39909e-06	0.000145385	4.45558	FBgn0263120	Acsl
1.48452	0.0342842	5.38477	0.00088807	0.00353803	-0.472762	FBgn0038485	CG5255
1.48377	-0.519699	5.80543	0.000562597	0.00252744	0.102292	FBgn0038181	CG9297
1.48331	-0.474726	5.91481	0.00050148	0.0023338	0.216067	FBgn0032891	Oseg5
1.47963	7.34293	10.8998	8.79025e-06	0.000188453	3.88675	FBgn0259834	out
1.47487	1.40337	7.46139	0.00011404	0.000850739	1.48141	FBgn0035091	CG3829
1.47457	-1.50422	4.54721	0.00236752	0.00736195	-1.25196	FBgn0035187	Trh
1.47453	1.88221	5.71652	0.000618408	0.0026903	-0.446971	FBgn0046258	CG12880
1.47078	2.31458	9.27627	2.66165e-05	0.000349415	2.91367	FBgn0083956	CG34120
1.46133	4.51389	13.8486	1.64193e-06	8.60943e-05	5.7149	FBgn0031306	CG4577
1.45936	-1.95558	3.81224	0.00608952	0.0153137	-2.15729	FBgn0036324	CG12520
1.45934	0.422943	7.1462	0.000151117	0.00102658	1.34476	FBgn0034440	CG10073
1.45691	0.137266	5.26167	0.00101946	0.00393863	-0.640522	FBgn0031432	Cyp309a1
1.45439	2.97953	7.32305	0.000128886	0.000924976	1.08245	FBgn0037386	CG1208
1.4533	0.313381	5.73474	0.00060649	0.00265916	-0.119104	FBgn0051646	CG31646
1.4466	2.69819	8.38352	5.26919e-05	0.000528101	2.10874	FBgn0005677	dac
1.44639	4.97508	13.163	2.3497e-06	9.99141e-05	5.30535	FBgn0051300	CG31300
1.44606	-1.05367	3.2617	0.0130164	0.0281486	-3.08876	FBgn0035279	Cpr62Ba
1.44352	0.433118	6.94413	0.000181939	0.00115521	1.14518	FBgn0036725	CG18265
1.44073	-1.915	3.90498	0.0053812	0.013856	-2.03739	FBgn0002632	E(spl)m6-BFM
1.43612	4.39081	6.15557	0.000391333	0.00194039	-0.314011	FBgn0015766	Msr-110
1.43596	7.65798	11.8806	4.8248e-06	0.000138798	4.55574	FBgn0033212	CG1399
1.4345	-2.14925	3.23995	0.0134244	0.0288982	-2.9314	FBgn0052436	CG32436
1.43431	1.1255	5.99128	0.000463142	0.00219189	0.0140004	FBgn0044028	Notum
1.43265	2.71934	6.00949	0.000454501	0.0021613	-0.262241	FBgn0033297	Mal-A8
1.43248	1.17944	8.2328	5.94859e-05	0.000573682	2.21914	FBgn0005638	slbo
1.42431	-0.137965	5.75666	0.000592483	0.00262088	-0.0138176	FBgn0039058	VhaAC39-2
1.42384	0.041932	6.25222	0.000354936	0.00181523	0.499045	FBgn0003900	twi
1.42371	4.68471	13.8428	1.64677e-06	8.60943e-05	5.70314	FBgn0015777	nrv2
1.42017	1.30249	6.05202	0.00043501	0.00208973	0.0464849	FBgn0265045	Strn-Mlck
1.41589	5.36002	12.1425	4.14222e-06	0.000128954	4.67605	FBgn0051998	CG31998
1.40981	4.61861	11.4439	6.26602e-06	0.000160511	4.24182	FBgn0030484	GstT4
1.40916	7.33212	12.3542	3.6696e-06	0.000123332	4.84573	FBgn0023458	Rbcn-3A
1.40845	1.14015	6.46891	0.000286284	0.00157193	0.531216	FBgn0261999	CG42817
1.40649	6.5251	13.8021	1.68142e-06	8.68898e-05	5.67746	FBgn0261862	whd
1.40519	2.24903	9.88155	1.72863e-05	0.000276084	3.39054	FBgn0036354	Poc1
1.40465	2.40547	9.53126	2.21272e-05	0.000309573	3.10004	FBgn0261649	tinc
1.4042	2.34708	10.0467	1.54275e-05	0.000257798	3.49976	FBgn0037174	CG14457
1.40054	-0.625225	4.10109	0.00416058	0.01139	-1.98509	FBgn0020372	TM4SF
1.39986	6.48191	7.51593	0.000108722	0.000822889	1.0787	FBgn0035356	CG16986
1.39979	-0.967443	4.93678	0.00148205	0.0051837	-0.845036	FBgn0004646	ogre
1.39495	5.66767	15.6025	7.04361e-07	5.93478e-05	6.60954	FBgn0263231	bel
1.39331	-0.565102	5.31285	0.000962385	0.00376783	-0.455874	FBgn0004379	Klp67A
1.38909	1.58845	3.93597	0.00516489	0.0134383	-2.69144	FBgn0016684	NaPi-T
1.38408	0.798447	4.99851	0.00137879	0.00494173	-1.10064	FBgn0031002	CG14196
1.37937	-1.58761	3.52385	0.00901728	0.020863	-2.61728	FBgn0031903	Wnt10
1.3746	9.4487	12.7771	2.89727e-06	0.00010883	5.1642	FBgn0010078	RpL23
1.37262	-0.490938	5.28276	0.000995501	0.00386611	-0.504059	FBgn0038530	AttD
1.37228	1.35242	7.96662	7.40304e-05	0.000650768	1.95406	FBgn0024150	Ac78C
1.37109	2.19294	9.52309	2.2257e-05	0.000310514	3.12379	FBgn0029935	CG4615
1.36668	-2.62088	2.91334	0.0214919	0.0421723	-3.33124	FBgn0037937	Fer3
1.36521	1.73487	6.41942	0.000300548	0.00161959	0.364836	FBgn0029114	Tollo
1.36455	6.31564	10.1595	1.42879e-05	0.000248435	3.32105	FBgn0033236	CG14764
1.36363	2.52645	10.3123	1.28919e-05	0.00023482	3.66882	FBgn0052372	ltl
1.36287	5.03855	12.8708	2.75204e-06	0.000105605	5.12898	FBgn0086613	Ino80
1.36226	3.77712	12.0904	4.26877e-06	0.000129805	4.72388	FBgn0033739	Dyb
1.35795	-1.59024	3.2629	0.0129944	0.0281088	-2.9908	FBgn0035985	Cpr67B
1.35766	1.72545	9.25975	2.69411e-05	0.000351446	2.98525	FBgn0032682	CG10176
1.3484	2.0288	9.73628	1.9132e-05	0.00029133	3.31077	FBgn0030769	CG13012
1.34838	-0.193966	5.81942	0.000554339	0.00249788	0.0641834	FBgn0039593	CG9989
1.34714	-0.845264	5.1415	0.00116878	0.00437194	-0.616482	FBgn0037015	cmpy
1.33723	3.73593	11.2769	6.9408e-06	0.000168616	4.1958	FBgn0037448	CG15186
1.33649	1.26376	8.14784	6.37467e-05	0.000598819	2.12874	FBgn0034187	CG6967
1.33473	2.67836	4.30668	0.00319677	0.00925947	-2.38846	FBgn0034716	Oatp58Dc
1.33198	1.32995	8.42191	5.11038e-05	0.000519759	2.35562	FBgn0050085	Rif1
1.33133	-1.87588	3.62719	0.00782319	0.0186455	-2.4267	FBgn0033983	CG10253
1.33107	6.0858	11.1562	7.48025e-06	0.00017415	4.02982	FBgn0026619	Taz
1.32943	10.6739	7.23303	0.000139707	0.000972729	0.939865	FBgn0085358	Diedel3
1.32882	3.86949	10.7297	9.80192e-06	0.000201446	3.8034	FBgn0259734	CG42388
1.3259	-0.892893	4.37136	0.00294627	0.00869581	-1.57581	FBgn0000241	bw
1.32386	4.18498	10.116	1.47153e-05	0.000251724	3.32783	FBgn0032029	CG17292
1.32028	6.63244	14.6652	1.09414e-06	7.19244e-05	6.14727	FBgn0033079	Fmo-2
1.31834	-1.55705	3.79797	0.00620717	0.015531	-2.23939	FBgn0030244	CG2157
1.31611	0.354027	6.18068	0.00038149	0.00190156	0.365489	FBgn0035348	CG16758
1.31388	1.90368	7.05651	0.000164011	0.00107813	0.993982	FBgn0031393	CG15382
1.31224	6.9625	13.2228	2.27586e-06	9.92201e-05	5.35768	FBgn0033246	ACC
1.31198	-0.851777	3.95612	0.00502926	0.0131684	-2.14275	FBgn0029866	CG3842
1.30989	7.67743	10.1295	1.45817e-05	0.000250212	3.33973	FBgn0037989	ATP8B
1.30634	0.580389	5.85299	0.00053506	0.00244802	-0.0399335	FBgn0004107	Cdk2
1.30567	6.74751	13.3622	2.11362e-06	9.54329e-05	5.43289	FBgn0262475	bru-2
1.30564	2.0809	9.19287	2.83011e-05	0.000363523	2.87819	FBgn0001086	fzy
1.30459	3.20709	6.426	0.000298607	0.00161392	0.118956	FBgn0035677	CG13293
1.3007	8.86395	12.2866	3.81367e-06	0.000125957	4.84918	FBgn0004167	kst
1.2993	3.5356	9.61095	2.09042e-05	0.000299436	3.00623	FBgn0005695	gcl
1.2961	8.08596	8.67901	4.17576e-05	0.000463696	2.19192	FBgn0039430	CG5455
1.2959	6.23085	11.4484	6.24861e-06	0.000160511	4.23115	FBgn0036993	CG5910
1.2944	6.91344	11.8794	4.82843e-06	0.000138798	4.53241	FBgn0026718	fu12
1.29268	-0.0947342	4.26605	0.00336598	0.00962015	-1.86931	FBgn0030421	CG3812
1.2916	7.18695	14.1886	1.38295e-06	7.82505e-05	5.90636	FBgn0038197	foxo
1.29123	6.22301	13.5092	1.95653e-06	9.25469e-05	5.50509	FBgn0032433	Oatp33Ea
1.29047	-0.532365	4.9491	0.00146079	0.00513344	-0.902428	FBgn0030102	CG12119
1.28211	-2.17386	3.43018	0.01027	0.0232512	-2.65883	FBgn0086913	Rab26
1.28047	3.46359	10.5456	1.10485e-05	0.000215364	3.71461	FBgn0005670	Cyp4d1
1.28039	4.08241	11.5491	5.87865e-06	0.000154574	4.3449	FBgn0051102	CG31102
1.27619	6.97003	12.8885	2.72561e-06	0.000105605	5.16078	FBgn0041094	scyl
1.27414	1.69803	4.71599	0.00192747	0.00629125	-1.65422	FBgn0034715	Oatp58Db
1.27362	-1.62482	3.55901	0.00859043	0.0200413	-2.56261	FBgn0038180	Cht5
1.27094	1.34203	7.74144	8.94996e-05	0.000734061	1.74802	FBgn0267433	kl-5
1.27011	1.30186	6.66699	0.000236297	0.0013898	0.704103	FBgn0264442	ab
1.26913	5.38285	10.3709	1.2398e-05	0.000230432	3.46513	FBgn0034141	CG8311
1.26813	-2.42735	2.87877	0.0226056	0.043924	-3.41265	FBgn0035290	dsb
1.26663	1.27188	3.00637	0.0187718	0.037874	-3.99416	FBgn0005658	Ets65A
1.25473	4.56919	10.8496	9.07609e-06	0.000191821	3.83326	FBgn0028540	CG9008
1.25454	-0.0596577	5.66237	0.000655401	0.00280214	-0.138112	FBgn0261041	stj
1.25299	6.5508	5.40941	0.000864083	0.00345633	-1.21053	FBgn0034664	CG4377
1.24474	1.85194	7.12993	0.000153369	0.00103637	1.07418	FBgn0265182	CG44247
1.24457	-0.718193	4.88841	0.00156895	0.00541769	-0.946614	FBgn0050025	CG30025
1.24144	6.06286	12.6092	3.17945e-06	0.000112349	4.96987	FBgn0033134	Tsp42El
1.23903	3.74794	8.99443	3.28143e-05	0.000399673	2.48343	FBgn0036373	Tgi
1.23815	1.19657	6.85425	0.000197861	0.00122754	0.915062	FBgn0086356	tum
1.23527	8.48413	12.6437	3.11909e-06	0.000111206	5.0573	FBgn0016693	Past1
1.2352	9.0665	7.90988	7.76238e-05	0.000668552	1.54169	FBgn0032665	CG15152
1.23344	2.7381	7.51717	0.000108604	0.000822889	1.30329	FBgn0259246	brp
1.23343	4.5609	8.06417	6.82804e-05	0.000617741	1.60162	FBgn0031998	SLC5A11
1.23179	6.57366	12.3819	3.61255e-06	0.00012273	4.84168	FBgn0031897	CG13784
1.23113	6.67581	11.7525	5.20444e-06	0.000144049	4.44338	FBgn0036316	CG10960
1.23094	7.36112	5.48504	0.000794842	0.00325516	-1.09026	FBgn0037387	CG1213
1.22903	3.56442	8.75788	3.92884e-05	0.000444606	2.30611	FBgn0051076	CG31076
1.22858	6.50273	9.73178	1.91926e-05	0.00029133	2.99933	FBgn0038100	Paip2
1.22769	-1.22982	4.05459	0.00441998	0.0119379	-1.94324	FBgn0053200	ventrally-expressed-protein-D
1.2224	7.04213	12.4671	3.4428e-06	0.000118836	4.90708	FBgn0027594	drpr
1.22132	6.49766	12.0016	4.49481e-06	0.000133945	4.59983	FBgn0037146	CG7470
1.22021	1.42674	4.69953	0.00196614	0.00639173	-1.62161	FBgn0044872	FucTC
1.21809	4.6354	12.9253	2.67143e-06	0.000105605	5.1732	FBgn0031571	CG3921
1.21738	3.36603	9.69305	1.97235e-05	0.000295392	3.08902	FBgn0030077	CG15365
1.21605	1.37444	6.32149	0.000331173	0.00172836	0.322157	FBgn0031490	CG17264
1.21601	5.57884	12.4071	3.56142e-06	0.000122069	4.839	FBgn0085265	CG34236
1.21521	1.70699	7.63626	9.79446e-05	0.000771157	1.5873	FBgn0263220	Hk
1.21487	5.43956	9.22718	2.7594e-05	0.000357522	2.5789	FBgn0066101	LpR1
1.21419	-0.227016	5.25838	0.00102326	0.00395006	-0.581564	FBgn0034861	CG9815
1.21153	0.705067	5.94102	0.000487955	0.0022862	0.0324543	FBgn0035490	CG1136
1.21085	1.62103	6.70574	0.000227705	0.00135893	0.683955	FBgn0033520	Prx2540-1
1.20961	2.20113	8.40002	5.20024e-05	0.000523846	2.19577	FBgn0260399	gwl
1.20914	0.998765	6.44438	0.000293257	0.00159666	0.525452	FBgn0033065	Cyp6w1
1.20907	-1.23527	3.63466	0.00774372	0.0184857	-2.52352	FBgn0035412	CG14957
1.20817	3.49794	10.0788	1.50935e-05	0.000252865	3.36664	FBgn0013751	Awh
1.20696	5.3229	11.87	4.85521e-06	0.00013912	4.49882	FBgn0033215	CG1942
1.20662	3.96098	10.511	1.13021e-05	0.000217291	3.6359	FBgn0034724	babos
1.20127	5.63919	12.9584	2.62378e-06	0.000105605	5.17451	FBgn0002932	neur
1.19943	7.10589	10.4522	1.17483e-05	0.000221618	3.55944	FBgn0031449	CG31689
1.19752	2.72954	8.55448	4.602e-05	0.000489202	2.24665	FBgn0012344	Dh44
1.19625	-0.343101	3.11823	0.0159739	0.0333038	-3.45366	FBgn0036880	Cpr76Bc
1.19548	1.86904	8.87039	3.60455e-05	0.000423453	2.64586	FBgn0051676	CG31676
1.19479	2.39537	8.23393	5.94316e-05	0.000573682	2.01843	FBgn0038874	ETHR
1.19446	3.08519	7.00932	0.000171286	0.00110492	0.746675	FBgn0264494	CG17646
1.19403	0.748273	6.63962	0.000242583	0.00141542	0.776001	FBgn0023001	melt
1.19331	5.74064	13.627	1.84022e-06	9.03935e-05	5.56355	FBgn0040252	Ugt86Dh
1.19325	1.98788	7.26731	0.000135471	0.000953628	1.18523	FBgn0039323	CG10559
1.19066	-1.92271	3.10267	0.0163351	0.0338517	-3.16924	FBgn0034281	CG14490
1.19015	4.67681	5.86314	0.000529376	0.00242574	-0.67191	FBgn0050277	Oatp58Da
1.18896	4.43146	12.9888	2.58089e-06	0.000104878	5.22097	FBgn0259685	crb
1.18711	2.39712	2.80927	0.0250315	0.0477859	-4.53157	FBgn0039081	Irk2
1.18601	5.47896	7.1283	0.000153596	0.00103652	0.675747	FBgn0264775	CG44013
1.18594	6.48614	9.39719	2.43709e-05	0.000328446	2.73452	FBgn0267002	unc-104
1.18554	4.64082	11.5169	5.99442e-06	0.000156239	4.28536	FBgn0052107	CG32107
1.18529	0.841194	4.87313	0.00159755	0.00547838	-1.27397	FBgn0001991	Ca-alpha1D
1.18491	3.27122	5.67178	0.000648801	0.00278058	-0.7478	FBgn0037818	CG6465
1.18327	6.12359	8.06314	6.83385e-05	0.000617741	1.58246	FBgn0028509	CenG1A
1.18276	6.51163	11.6913	5.39779e-06	0.000145385	4.39887	FBgn0028572	qtc
1.181	4.76072	7.65071	9.6733e-05	0.000764627	1.204	FBgn0031169	CG1494
1.18028	6.27885	12.234	3.93008e-06	0.000127763	4.74177	FBgn0011704	RnrS
1.17897	6.68898	6.14767	0.000394484	0.00194844	-0.34171	FBgn0013685	mt:ND6
1.17879	1.50443	5.13701	0.00117481	0.00437983	-1.07971	FBgn0032439	Ref2
1.17436	8.81424	9.54422	2.19229e-05	0.000309045	2.92857	FBgn0014380	RhoL
1.17426	-1.98254	3.20952	0.0140185	0.0299249	-3.00488	FBgn0038172	Adgf-D
1.17321	-1.51612	3.55907	0.00858972	0.0200413	-2.58204	FBgn0000147	aurA
1.17243	0.887372	4.05942	0.00439225	0.0118846	-2.37179	FBgn0263390	Nha2
1.17188	7.34474	8.32152	5.53749e-05	0.000543415	1.8536	FBgn0000723	FER
1.16555	5.83849	10.9893	8.30569e-06	0.000183745	3.90876	FBgn0030574	CG9413
1.16487	6.72808	11.0458	8.01535e-06	0.000180043	3.9695	FBgn0028515	EndoGI
1.16393	2.00755	3.11929	0.0159497	0.0332688	-3.98321	FBgn0039728	CG7896
1.16252	0.39694	5.2859	0.000991985	0.0038558	-0.670314	FBgn0035160	hng3
1.16194	4.28964	11.5836	5.75756e-06	0.000151837	4.35	FBgn0033635	CG7777
1.16027	1.8943	5.0013	0.00137431	0.00492833	-1.32737	FBgn0004575	Syn
1.15401	3.88796	6.47566	0.000284397	0.00156833	0.0794105	FBgn0038349	AOX3
1.15315	6.18798	9.63639	2.05301e-05	0.000298924	2.91599	FBgn0030964	Pvf1
1.14896	0.69428	5.83616	0.000544627	0.0024678	-0.0856904	FBgn0265575	yin
1.1485	4.07521	11.0864	7.81342e-06	0.000177849	4.03073	FBgn0033139	Tsp42Er
1.14782	-0.351062	4.27977	0.00330777	0.00949628	-1.80131	FBgn0036519	CG7650
1.14764	2.48442	7.76718	8.75596e-05	0.000723459	1.5788	FBgn0038588	CG7156
1.14526	9.65951	11.4518	6.23592e-06	0.000160511	4.33453	FBgn0030040	CG15347
1.14461	7.11506	12.3971	3.58165e-06	0.000122214	4.86587	FBgn0035625	Blimp-1
1.14338	-1.95865	3.05485	0.0175005	0.0357365	-3.23328	FBgn0010317	CycJ
1.14248	5.54621	11.1624	7.45153e-06	0.000173934	4.02554	FBgn0003041	pbl
1.14001	-0.833189	3.78002	0.00635874	0.0158437	-2.39367	FBgn0031848	Nse1
1.13382	6.68695	11.0074	8.21151e-06	0.000183527	3.94165	FBgn0039958	CG12567
1.1338	-1.02313	4.05757	0.00440284	0.0118988	-1.97581	FBgn0033866	CG6280
1.1324	4.19206	4.88673	0.00157206	0.00542633	-1.83387	FBgn0033999	CG8093
1.13164	5.05935	9.97948	1.61555e-05	0.000266476	3.17516	FBgn0031814	retm
1.13067	-0.323098	4.71623	0.0019269	0.00629125	-1.23574	FBgn0011828	Pxn
1.12991	0.980448	6.64265	0.00024188	0.00141407	0.734618	FBgn0004882	orb
1.12987	5.92549	12.9011	2.70698e-06	0.000105605	5.14316	FBgn0002569	Mal-A2
1.12811	6.67502	6.86925	0.000195099	0.00121583	0.436345	FBgn0034394	CG15096
1.12662	4.91308	12.3718	3.63324e-06	0.00012273	4.8239	FBgn0042104	CG18747
1.12637	-0.287426	4.7047	0.00195391	0.00636355	-1.25735	FBgn0023091	dimm
1.12636	3.33352	7.51539	0.000108773	0.000822889	1.21034	FBgn0085422	CG34393
1.12427	4.90408	8.81203	3.76884e-05	0.000438146	2.24166	FBgn0032449	CG17036
1.12336	1.7696	7.11744	0.000155124	0.00104507	1.07371	FBgn0002023	Lim3
1.12327	-0.899087	2.99768	0.0190096	0.0382709	-3.51459	FBgn0039064	CG4467
1.12131	-0.226593	4.88457	0.00157609	0.00543394	-1.04137	FBgn0260006	drd
1.12025	6.1045	10.6009	1.06558e-05	0.000209831	3.63872	FBgn0015039	Cyp9b2
1.1172	1.52373	6.4934	0.000279508	0.00154916	0.476521	FBgn0052647	CG32647
1.11641	4.0373	7.14689	0.000151022	0.00102658	0.762869	FBgn0032780	CG13085
1.11629	0.0425504	5.1604	0.00114378	0.0043036	-0.752531	FBgn0038926	CG13409
1.11622	0.834854	6.34716	0.00032282	0.00169837	0.450063	FBgn0053179	beat-IIIb
1.11484	4.35542	10.8018	9.35789e-06	0.000194892	3.81032	FBgn0036336	ste14
1.11437	4.57676	9.64015	2.04754e-05	0.000298924	2.93194	FBgn0028552	gammaSnap1
1.1141	6.98104	11.261	7.00948e-06	0.000168908	4.12456	FBgn0035542	DOR
1.1135	0.219764	4.85299	0.00163612	0.00558065	-1.17083	FBgn0038744	CG4733
1.11209	5.92885	11.8849	4.81267e-06	0.000138798	4.51118	FBgn0265186	CG44251
1.11181	1.6068	4.40713	0.00281704	0.00841442	-2.05031	FBgn0026314	Ugt35b
1.10951	0.574522	4.73044	0.0018942	0.00622072	-1.40268	FBgn0033697	Cyp6t3
1.10939	2.20248	7.60144	0.000100935	0.000785343	1.46894	FBgn0035941	CG13313
1.10878	4.35269	9.40956	2.41536e-05	0.000328165	2.7636	FBgn0263607	l(3)72Dp
1.10504	8.71798	7.74964	8.88761e-05	0.000729815	1.37965	FBgn0010246	Myo61F
1.10467	1.20368	4.91033	0.00152889	0.0053122	-1.30577	FBgn0261612	CngA
1.10447	4.87802	12.7235	2.98407e-06	0.000109784	5.0407	FBgn0052407	CG32407
1.10422	5.86948	12.6634	3.08514e-06	0.000111206	4.99872	FBgn0032330	Samuel
1.10403	6.23073	10.2924	1.30651e-05	0.000235368	3.41664	FBgn0034709	Swim
1.10395	2.76391	9.07087	3.09863e-05	0.000385504	2.67313	FBgn0034657	LBR
1.10204	-0.764133	3.1242	0.0158376	0.033133	-3.35594	FBgn0031835	CG11319
1.10185	4.82643	11.9131	4.73353e-06	0.000137564	4.53581	FBgn0000256	capu
1.10171	5.88568	11.0159	8.16731e-06	0.000182997	3.92768	FBgn0023537	CG17896
1.10133	7.99735	8.97447	3.33116e-05	0.000402985	2.43813	FBgn0015776	nrv1
1.1007	2.12352	4.28771	0.00327457	0.00944038	-2.31552	FBgn0033302	Cyp6a14
1.09966	4.38307	9.69287	1.97259e-05	0.000295392	2.98521	FBgn0031602	CG15431
1.09926	-0.232883	4.64205	0.00210808	0.00676461	-1.34892	FBgn0050485	CG30485
1.09883	0.382751	4.91583	0.00151902	0.00529436	-1.1257	FBgn0039900	Syt7
1.09858	7.28957	7.88019	7.95823e-05	0.000681481	1.45016	FBgn0031579	CG15422
1.0963	2.62389	8.68114	4.16887e-05	0.000463554	2.36897	FBgn0003218	rdgB
1.0961	4.07351	8.51986	4.72903e-05	0.000496798	2.04357	FBgn0053542	upd3
1.09426	-1.19292	3.37174	0.011145	0.0248594	-2.90861	FBgn0029765	CG16756
1.09407	-1.04598	3.16401	0.0149596	0.0315496	-3.23985	FBgn0029531	CG13362
1.09405	0.18868	5.44034	0.000834989	0.00337028	-0.44583	FBgn0259789	vfl
1.09345	5.06111	12.222	3.95716e-06	0.000128099	4.72595	FBgn0030048	CG12112
1.09291	5.31644	10.2456	1.34818e-05	0.000238405	3.37066	FBgn0001987	Gli
1.0927	6.5861	12.1781	4.0582e-06	0.000128654	4.71404	FBgn0051522	CG31522
1.09229	2.36062	7.38411	0.000122081	0.000893129	1.23391	FBgn0264324	spg
1.09124	5.95813	10.5321	1.11462e-05	0.000216154	3.58561	FBgn0035049	Mmp1
1.0908	1.90109	6.64511	0.00024131	0.00141407	0.567701	FBgn0036769	Tsp74F
1.08707	3.84063	11.3216	6.75251e-06	0.000165845	4.21114	FBgn0261547	Exn
1.08652	2.49441	8.2072	6.07352e-05	0.00058072	1.97692	FBgn0039809	CG15547
1.08528	5.98262	7.14652	0.000151073	0.00102658	0.699222	FBgn0259227	CG42327
1.08429	5.47357	10.1087	1.47893e-05	0.000251724	3.26777	FBgn0262733	Src64B
1.08424	8.84612	8.6899	4.14065e-05	0.00046213	2.22817	FBgn0261836	Msp300
1.08319	-0.129089	3.57488	0.0084048	0.019737	-2.83304	FBgn0031116	CG1695
1.08218	8.10957	9.20984	2.79489e-05	0.000360639	2.63593	FBgn0028646	aralar1
1.08208	9.08995	8.35111	5.40757e-05	0.000538348	1.94195	FBgn0051901	Mur29B
1.08124	3.93057	8.43172	5.07066e-05	0.000516431	1.98021	FBgn0035431	CG14968
1.08089	3.73016	7.35791	0.000124951	0.000905967	1.00535	FBgn0015380	drl
1.07758	4.6965	8.94425	3.40805e-05	0.000407871	2.36101	FBgn0036821	CG3961
1.07677	4.54544	10.772	9.53862e-06	0.000197396	3.7767	FBgn0263351	AP-2mu
1.07432	-0.980251	3.6668	0.00741157	0.0178741	-2.52665	FBgn0023540	CG3630
1.07418	6.24543	10.9703	8.40609e-06	0.000183745	3.90371	FBgn0015791	Rab14
1.0705	2.94189	6.74894	0.000218535	0.00132634	0.497798	FBgn0038916	dnd
1.06985	5.66868	11.3651	6.5747e-06	0.000162819	4.16384	FBgn0050344	CG30344
1.06907	4.40924	10.3443	1.26198e-05	0.000233086	3.47615	FBgn0034085	Ptp52F
1.06877	5.95245	12.1243	4.18596e-06	0.000128954	4.66476	FBgn0032387	CG16965
1.06654	8.17149	6.029	0.000445443	0.002125	-0.421979	FBgn0031653	Jon25Biii
1.06651	0.131378	4.47457	0.00258991	0.00787275	-1.64306	FBgn0037375	kat-60L1
1.06544	5.82598	12.2459	3.90345e-06	0.000127361	4.73952	FBgn0013995	Calx
1.06508	4.42695	8.28488	5.70328e-05	0.000555418	1.80671	FBgn0038878	CG3301
1.06503	-1.22114	2.8743	0.0227538	0.0441544	-3.63441	FBgn0035797	CG14837
1.06478	1.612	7.27294	0.000134789	0.000949578	1.25313	FBgn0263080	CG43348
1.06462	3.47124	9.66897	2.00617e-05	0.000297433	3.0545	FBgn0000024	Ace
1.06241	8.93961	7.95333	7.48552e-05	0.000653521	1.57751	FBgn0051004	mesh
1.06091	5.03268	10.3303	1.27381e-05	0.000233358	3.43743	FBgn0031519	CG3326
1.06067	-0.783671	4.02343	0.00460362	0.0123296	-2.06687	FBgn0033490	CG12917
1.05783	-0.0490285	4.90126	0.00154532	0.00535748	-1.05624	FBgn0027949	msb1l
1.05724	3.35813	9.06691	3.10781e-05	0.000385504	2.5869	FBgn0259239	CG42337
1.05711	10.4283	8.21175	6.0511e-05	0.000580391	1.85701	FBgn0037358	elm
1.0569	5.24376	8.7849	3.84806e-05	0.000441047	2.20984	FBgn0039602	CG1647
1.05629	3.30549	8.12917	6.47283e-05	0.000600905	1.78537	FBgn0043362	bchs
1.05597	5.47831	8.58447	4.49506e-05	0.00048376	2.03632	FBgn0025335	CG4585
1.05476	5.34711	10.2929	1.30608e-05	0.000235368	3.40515	FBgn0085317	CG34288
1.05214	4.54462	11.2036	7.26285e-06	0.000172228	4.07681	FBgn0259923	2020-09-04
1.0518	-0.461291	3.96461	0.0049733	0.0130807	-2.21113	FBgn0031545	CG3213
1.05172	2.76656	4.09618	0.00418718	0.011458	-2.70296	FBgn0032684	CG10178
1.05115	3.36388	5.36576	0.000907075	0.00359451	-1.13195	FBgn0038641	CG7708
1.0465	-1.52013	2.87633	0.0226863	0.0440712	-3.57469	FBgn0015574	alpha-Est6
1.04623	7.54224	9.46987	2.31244e-05	0.000318049	2.8259	FBgn0037065	CG12974
1.04592	-0.292115	3.5455	0.00875185	0.0203542	-2.84008	FBgn0054051	CG34051
1.04567	7.75737	7.15021	0.000150568	0.00102658	0.760807	FBgn0035265	CG18173
1.04482	7.95098	9.37134	2.48325e-05	0.000332602	2.7609	FBgn0035094	CG9380
1.04379	8.49481	7.96237	7.4293e-05	0.000651783	1.56943	FBgn0010357	betaTry
1.04334	0.212433	4.81276	0.00171629	0.00579882	-1.22206	FBgn0260996	CG42597
1.04307	2.98298	4.89953	0.00154848	0.00536359	-1.65881	FBgn0261631	CG42714
1.04282	8.88142	9.40626	2.42114e-05	0.000328446	2.82148	FBgn0028491	CG2930
1.04204	2.8205	8.01764	7.09582e-05	0.000630583	1.75401	FBgn0039620	wat
1.04186	2.91737	7.51416	0.00010889	0.000822889	1.2682	FBgn0004919	gol
1.04175	0.668943	4.52577	0.00243089	0.00749644	-1.69368	FBgn0043043	Desat2
1.04124	-1.52584	3.32552	0.0118936	0.0261635	-2.91598	FBgn0050054	CG30054
1.04081	4.02884	8.98657	3.30091e-05	0.000400953	2.44432	FBgn0023516	Pex5
1.04049	-0.0915438	4.06201	0.00437745	0.0118589	-2.15368	FBgn0002924	ncd
1.03852	-0.430419	4.14465	0.00393257	0.0108711	-1.97009	FBgn0003089	pip
1.03801	7.0331	6.57906	0.000257172	0.00146908	0.142923	FBgn0003358	Jon99Ci
1.03674	4.69604	11.4262	6.33393e-06	0.000160904	4.21954	FBgn0263979	Caf1
1.03646	5.85112	11.0809	7.84046e-06	0.000177849	3.97178	FBgn0040299	Myo28B1
1.03596	1.47244	6.43594	0.000295702	0.00160606	0.422811	FBgn0051814	CG31814
1.03489	5.41833	9.62245	2.07342e-05	0.000299436	2.89345	FBgn0035656	CG10479
1.03416	1.45609	5.83727	0.000543993	0.00246618	-0.237134	FBgn0034262	swi2
1.02966	0.0888839	4.47773	0.00257976	0.00784725	-1.63068	FBgn0032436	CG5418
1.02732	5.29867	10.0888	1.49909e-05	0.000252418	3.25265	FBgn0051116	ClC-a
1.02613	5.80691	8.65059	4.26896e-05	0.000469618	2.09633	FBgn0038974	CG5377
1.02542	1.81092	5.98585	0.000465752	0.00219843	-0.135096	FBgn0086367	t
1.02532	1.25435	6.5595	0.00026209	0.0014851	0.594325	FBgn0025620	CG13360
1.02503	3.94001	9.91121	1.69347e-05	0.000272786	3.18954	FBgn0265002	CG44153
1.02361	3.03759	5.03964	0.0013144	0.00476388	-1.48908	FBgn0039325	CG10560
1.02341	7.45499	9.85553	1.76016e-05	0.0002795	3.12444	FBgn0261671	tweek
1.02177	0.554154	4.5124	0.00247136	0.00758981	-1.68619	FBgn0030261	CG15203
1.02001	5.48386	10.3452	1.2612e-05	0.000233086	3.44314	FBgn0040271	Sulf1
1.01942	3.61933	6.88653	0.00019197	0.00120417	0.542878	FBgn0040383	CG5254
1.01869	2.12147	6.81639	0.00020503	0.00126064	0.705572	FBgn0035888	CG7120
1.01864	1.50711	6.40511	0.000304821	0.00163768	0.382943	FBgn0032116	Mco1
1.01625	6.53267	6.68651	0.000231924	0.00137407	0.240143	FBgn0028703	Nhe3
1.01562	6.68989	9.4705	2.31138e-05	0.000318049	2.7988	FBgn0036196	CG11658
1.01551	6.78482	10.097	1.49071e-05	0.000251926	3.28652	FBgn0010350	CdsA
1.01517	6.46814	9.08354	3.06945e-05	0.000383252	2.47819	FBgn0004914	Hnf4
1.01436	7.64298	7.26557	0.000135682	0.000953656	0.871857	FBgn0024315	Picot
1.01409	3.45437	6.29859	0.000338827	0.00175805	-0.0620518	FBgn0263456	nwk
1.01285	4.40628	8.15262	6.34982e-05	0.000598181	1.68844	FBgn0050154	CG30154
1.01255	5.42872	6.99491	0.000173579	0.00111882	0.538266	FBgn0085223	CG34194
1.01197	1.05981	6.06179	0.000430664	0.00207779	0.0926559	FBgn0259237	CG42335
1.01184	2.09974	6.42208	0.000299761	0.0016173	0.293488	FBgn0052506	CG32506
1.01177	3.02638	6.72725	0.000223085	0.00134211	0.460942	FBgn0030756	CG9903
1.01143	1.55395	5.56686	0.000726789	0.00303763	-0.571588	FBgn0019650	toy
1.011	6.60235	10.9958	8.27144e-06	0.000183745	3.93104	FBgn0040364	CG11378
1.01016	5.29443	11.5043	6.04002e-06	0.00015697	4.25616	FBgn0040765	luna
1.01002	6.07291	9.63863	2.04974e-05	0.000298924	2.9142	FBgn0086358	Tab2
1.00986	5.45491	10.7539	9.65041e-06	0.000199186	3.73879	FBgn0016078	wun
1.00773	4.1973	8.80126	3.80006e-05	0.000439749	2.27293	FBgn0023179	amon
1.0065	13.3015	9.16977	2.87887e-05	0.000365017	2.73584	FBgn0013684	mt:ND5
1.00602	1.54959	6.32487	0.00033006	0.00172558	0.288263	FBgn0041707	7B2
1.00314	-0.83315	3.35496	0.0114107	0.0253533	-3.00427	FBgn0028946	Or35a
1.00246	7.53717	6.90348	0.000188956	0.0011913	0.501657	FBgn0000251	cad
1.00234	-0.401574	3.21347	0.0139399	0.0298141	-3.30288	FBgn0261085	Syt12
0.997615	3.10692	6.03377	0.000443257	0.00212023	-0.307487	FBgn0030576	CG15890
0.997382	0.702613	4.40389	0.00282848	0.00844144	-1.86434	FBgn0034356	CG10924
0.997089	7.23928	10.1353	1.45241e-05	0.000249703	3.32967	FBgn0038924	CG6028
0.995773	7.44235	9.79371	1.8377e-05	0.000286492	3.07642	FBgn0024273	WASp
0.995485	0.829747	5.03951	0.0013146	0.00476388	-1.06733	FBgn0267337	rn
0.995295	4.25306	7.90863	7.77053e-05	0.000668609	1.47616	FBgn0034494	CG10444
0.993798	5.83451	7.06205	0.00016318	0.00107504	0.610302	FBgn0019643	Dat
0.992925	4.12701	7.32698	0.000128436	0.000924883	0.931308	FBgn0033904	CG18327
0.991155	2.14906	5.41422	0.000859483	0.0034441	-0.868306	FBgn0040257	Ugt86Dc
0.989561	1.97853	5.46931	0.000808725	0.00329535	-0.769404	FBgn0029092	ced-6
0.988313	2.59511	6.0541	0.00043408	0.00208751	-0.200425	FBgn0051812	CG31812
0.987387	1.96721	6.86187	0.000196454	0.0012222	0.778816	FBgn0038720	CG6231
0.987141	-0.887795	3.68495	0.00723082	0.0175233	-2.5196	FBgn0262167	ana1
0.985177	3.71656	9.67694	1.9949e-05	0.000296525	3.03127	FBgn0022160	Gpo-1
0.984597	-1.76279	2.97151	0.0197459	0.0394349	-3.39087	FBgn0032402	CG14945
0.984192	-1.08668	3.40449	0.0106451	0.0239054	-2.88285	FBgn0260991	Incenp
0.984187	8.62256	7.61419	9.98284e-05	0.000779967	1.24758	FBgn0035083	Tina-1
0.983751	6.54594	10.4479	1.17812e-05	0.000221734	3.53919	FBgn0052039	CG32039
0.983419	4.98185	9.34522	2.53088e-05	0.000335464	2.67818	FBgn0030743	CG9921
0.983171	2.66834	5.79336	0.000569837	0.00254845	-0.511819	FBgn0039916	CG9935
0.982234	7.47909	9.71596	1.94075e-05	0.000293176	3.01734	FBgn0016754	sba
0.981895	3.0605	8.81855	3.75006e-05	0.0004371	2.41899	FBgn0023180	Orc6
0.981555	3.40167	6.95907	0.000179434	0.00114337	0.645712	FBgn0004449	Ten-m
0.980733	5.20973	10.7955	9.39582e-06	0.000194892	3.76947	FBgn0013984	InR
0.980605	1.39631	4.7302	0.00189475	0.00622072	-1.58117	FBgn0030870	CG6398
0.980401	5.02951	10.2202	1.37142e-05	0.000241348	3.35474	FBgn0000119	arr
0.979137	9.11323	4.89061	0.00156488	0.00540848	-1.7658	FBgn0039342	CG5107
0.978766	4.26834	9.41279	2.40971e-05	0.000328165	2.77044	FBgn0001296	kar
0.978605	6.91998	7.38537	0.000121945	0.000892868	0.964762	FBgn0033638	CG9005
0.978469	5.57436	10.7508	9.66964e-06	0.000199186	3.73686	FBgn0003256	rl
0.978377	3.31039	8.89572	3.53576e-05	0.000421462	2.44971	FBgn0053653	Caps
0.977691	5.86718	8.53263	4.68173e-05	0.000493569	1.99471	FBgn0003396	shn
0.97756	1.60659	5.92044	0.000498539	0.00232496	-0.171982	FBgn0031183	CG14621
0.97582	6.84559	10.7207	9.85892e-06	0.00020169	3.74469	FBgn0030056	CG11284
0.975619	5.5723	10.3397	1.2659e-05	0.000233086	3.4392	FBgn0053111	CG33111
0.974662	5.08562	9.96736	1.62908e-05	0.000267333	3.16299	FBgn0261393	alpha-Est5
0.974245	8.2379	7.13987	0.000151989	0.00103016	0.768138	FBgn0261794	kcc
0.973879	2.28697	7.75574	8.84157e-05	0.000729185	1.59731	FBgn0004028	wupA
0.9726	8.38936	8.79335	3.82318e-05	0.000439749	2.29969	FBgn0020257	Ppa
0.972535	4.03187	6.97391	0.000176984	0.0011326	0.585424	FBgn0033982	Cyp317a1
0.972296	2.21063	7.24631	0.000138048	0.000963017	1.1224	FBgn0028879	CG15270
0.972022	6.27587	9.82094	1.80308e-05	0.000284798	3.06122	FBgn0085370	Pde11
0.971559	7.06326	9.68613	1.982e-05	0.000296306	2.98069	FBgn0040260	Ugt36Bc
0.971436	4.63716	8.92865	3.44851e-05	0.000412162	2.34921	FBgn0041210	HDAC4
0.971368	4.45102	9.73169	1.91939e-05	0.00029133	3.00871	FBgn0011710	2020-09-01
0.971086	7.64832	8.64442	4.28952e-05	0.000470531	2.14629	FBgn0052446	Atox1
0.970983	1.81378	7.09838	0.000157845	0.00105782	1.04451	FBgn0035146	CG13893
0.970023	5.9305	7.73346	9.01111e-05	0.000734884	1.27005	FBgn0034783	CG9825
0.969938	2.84886	8.13126	6.46174e-05	0.000600905	1.85144	FBgn0032666	CG5758
0.969718	1.61962	4.44041	0.00270233	0.00813703	-2.01054	FBgn0031070	CG12702
0.969156	5.38824	9.63645	2.05292e-05	0.000298924	2.90388	FBgn0266429	AstA-R1
0.968526	3.92817	4.41395	0.0027931	0.00835968	-2.43711	FBgn0032066	CG9463
0.968343	4.00328	7.14108	0.000151822	0.00103016	0.757777	FBgn0063492	GstE8
0.967111	6.85987	8.12613	6.48898e-05	0.000601779	1.66148	FBgn0011202	dia
0.966672	4.02005	10.1674	1.42118e-05	0.000247667	3.3742	FBgn0022986	qkr58E-1
0.966029	4.86633	10.2375	1.35549e-05	0.000239015	3.37217	FBgn0030600	hiw
0.965461	-1.08559	3.49868	0.00933694	0.0214692	-2.74774	FBgn0034671	CG13494
0.96327	6.18796	9.49991	2.26302e-05	0.000312918	2.80741	FBgn0265991	Zasp52
0.963128	2.1056	6.77547	0.000213108	0.00129692	0.665052	FBgn0264711	CG43980
0.963095	3.83113	4.47542	0.00258717	0.0078671	-2.34263	FBgn0050272	CG30272
0.962012	2.67234	8.32959	5.50172e-05	0.000541419	2.05515	FBgn0085447	sif
0.9611	3.58991	9.21443	2.78544e-05	0.000360374	2.67703	FBgn0037781	Fancl
0.959737	6.3804	7.75007	8.88439e-05	0.000729815	1.29794	FBgn0032006	Pvr
0.95932	-1.59389	2.77849	0.0261917	0.0497248	-3.70675	FBgn0026721	fat-spondin
0.958636	5.79775	8.9447	3.40689e-05	0.000407871	2.34577	FBgn0011225	jar
0.958281	7.44278	8.85919	3.63542e-05	0.000426517	2.32241	FBgn0004362	HmgD
0.957483	6.27777	8.59663	4.45246e-05	0.000480958	2.06041	FBgn0032480	Edem2
0.957201	7.74369	8.90103	3.52151e-05	0.000420325	2.36766	FBgn0003165	pum
0.956413	0.793018	5.10051	0.00122512	0.00450725	-0.984796	FBgn0033890	Ctf4
0.955681	3.0486	7.64756	9.69957e-05	0.000766026	1.37422	FBgn0051660	pog
0.953822	5.82375	10.9992	8.25378e-06	0.000183745	3.91426	FBgn0036039	Naa60
0.952988	3.77895	8.33095	5.49573e-05	0.000541419	1.90535	FBgn0020762	Atet
0.952742	4.58535	8.88804	3.55645e-05	0.00042224	2.31789	FBgn0032782	Rab9
0.951753	4.23679	5.72319	0.000614015	0.00267752	-0.808307	FBgn0040730	CG15127
0.950973	2.07974	4.88524	0.00157484	0.00543174	-1.51584	FBgn0023515	CG14814
0.950895	2.35927	6.18451	0.000380013	0.00189737	-0.0139189	FBgn0039856	CG1774
0.950661	2.41897	5.25599	0.00102603	0.00395374	-1.1119	FBgn0034433	EndoB
0.94984	5.56116	8.9889	3.29512e-05	0.000400795	2.37998	FBgn0036191	Sug
0.948671	4.87517	8.05252	6.894e-05	0.000620385	1.5706	FBgn0033987	ckn
0.948011	0.604094	3.15545	0.0151439	0.0318706	-3.6238	FBgn0262858	CG43222
0.943227	2.61058	8.10931	6.57912e-05	0.000604388	1.86827	FBgn0033942	Cpr51A
0.941758	9.22529	7.23113	0.000139946	0.000973635	0.896495	FBgn0063649	CG6006
0.94166	5.78469	8.79041	3.83181e-05	0.000439749	2.21522	FBgn0040918	schlank
0.940599	5.29287	7.53297	0.000107118	0.000817197	1.07293	FBgn0029932	CG4607
0.940148	5.61324	10.4559	1.17196e-05	0.000221618	3.52446	FBgn0024187	syd
0.938755	8.52434	8.62859	4.34274e-05	0.000474758	2.16386	FBgn0003328	scb
0.936463	6.26816	6.86951	0.000195053	0.00121583	0.423259	FBgn0259749	mmy
0.936424	-0.543173	3.03304	0.0180608	0.0367045	-3.54036	FBgn0038221	CG3259
0.936144	1.69535	5.84538	0.000539363	0.0024544	-0.275319	FBgn0038404	CG8925
0.935783	7.49333	7.28027	0.000133907	0.000944852	0.881095	FBgn0265140	Meltrin
0.935345	5.56685	8.33929	5.45908e-05	0.000541419	1.82033	FBgn0039112	CG10219
0.934736	3.32411	6.3329	0.000327433	0.00171485	-0.00736419	FBgn0010014	CanB
0.934697	6.23059	9.80272	1.82616e-05	0.000286492	3.04578	FBgn0032694	MESR3
0.934559	1.40631	2.88442	0.0224196	0.0436099	-4.21831	FBgn0050296	RIC-3
0.933999	5.57197	9.77762	1.85851e-05	0.000286961	3.01415	FBgn0033453	CG1667
0.932848	10.0381	8.3146	5.5684e-05	0.000545366	1.93889	FBgn0035499	Chd64
0.931567	5.94562	6.68511	0.000232235	0.00137454	0.221371	FBgn0033853	CG6145
0.931515	7.06219	8.39827	5.20754e-05	0.000523846	1.91197	FBgn0266186	Vamp7
0.929843	4.47252	7.68471	9.39485e-05	0.000751535	1.24862	FBgn0003159	ptr
0.929331	5.16265	10.6281	1.04688e-05	0.000206602	3.65011	FBgn0031530	pgant2
0.92806	5.51505	7.74957	8.88815e-05	0.000729815	1.27946	FBgn0038475	Keap1
0.928016	6.1846	10.2046	1.38586e-05	0.000242458	3.34956	FBgn0000562	egl
0.927855	0.995922	5.60161	0.000699866	0.00294438	-0.422065	FBgn0039883	RhoGAP100F
0.927004	2.49836	6.42691	0.000298339	0.00161352	0.226947	FBgn0034179	CG6805
0.925266	4.18307	7.26552	0.000135688	0.000953656	0.864283	FBgn0039350	jigr1
0.925101	2.46432	5.91134	0.000503298	0.00233739	-0.341032	FBgn0067783	att-ORFA
0.92488	5.94797	9.60672	2.09672e-05	0.000299436	2.88592	FBgn0036752	Adgf-A
0.924056	9.26853	7.28595	0.000133228	0.000942292	0.952352	FBgn0037636	CG9821
0.923358	8.05269	9.17455	2.86872e-05	0.000365017	2.60485	FBgn0011742	Arp2
0.922805	5.34286	10.6405	1.03849e-05	0.000205958	3.65723	FBgn0015589	Apc
0.921885	0.978832	5.63567	0.000674543	0.00286344	-0.378941	FBgn0015625	CycB3
0.92115	6.34803	5.32976	0.000944315	0.00371085	-1.31573	FBgn0027538	beta4GalNAcTA
0.920689	1.26026	5.80853	0.000560758	0.00252299	-0.234646	FBgn0017577	Mcm5
0.919813	1.01937	5.50397	0.000778497	0.00320504	-0.542307	FBgn0031001	CG7884
0.919493	-0.364211	3.73033	0.00679942	0.0166997	-2.56198	FBgn0033696	Cyp6g2
0.918079	0.626039	4.79223	0.00175889	0.00590035	-1.33959	FBgn0015034	Cyp4e1
0.916611	3.39708	6.19048	0.000377728	0.00189287	-0.175623	FBgn0029843	Nep1
0.915138	4.16556	7.764	8.77967e-05	0.000724749	1.34755	FBgn0085415	CG34386
0.914579	4.89859	7.35994	0.000124726	0.000905807	0.912248	FBgn0020445	E23
0.914203	2.76197	7.85757	8.11112e-05	0.00068668	1.61394	FBgn0036815	HipHop
0.913869	6.78709	9.25642	2.70071e-05	0.000351446	2.6296	FBgn0020386	Pdk1
0.910309	5.74247	9.57362	2.14674e-05	0.000305777	2.85619	FBgn0035978	UGP
0.909985	4.37387	9.32199	2.57411e-05	0.000339418	2.68869	FBgn0031882	Rab30
0.908805	4.76996	10.1571	1.43114e-05	0.000248435	3.31521	FBgn0000546	EcR
0.908331	7.05791	6.73865	0.000220681	0.00133479	0.313084	FBgn0031170	CG1718
0.907996	-0.471946	3.12712	0.0157715	0.0330358	-3.41654	FBgn0036984	CG13248
0.907928	4.52497	8.33643	5.47162e-05	0.000541419	1.84379	FBgn0035266	Gk
0.907863	3.80135	7.57755	0.000103045	0.000796907	1.20731	FBgn0026755	Ugt37b1
0.907629	0.237846	4.04938	0.00445012	0.0120048	-2.24639	FBgn0033610	CG18335
0.906036	2.67271	6.59752	0.000252624	0.00145073	0.379556	FBgn0250819	CG33521
0.905781	7.28646	6.32005	0.000331647	0.00172983	-0.129178	FBgn0032002	CG8353
0.905672	3.89625	9.66241	2.01552e-05	0.000297652	3.00015	FBgn0035538	DopEcR
0.905604	6.28836	10.2587	1.33636e-05	0.000237135	3.39245	FBgn0036372	Abp1
0.905333	7.03925	9.29993	2.61594e-05	0.000344426	2.67312	FBgn0035101	p130CAS
0.905175	5.73951	8.24083	5.91001e-05	0.000571194	1.734	FBgn0037551	Gie
0.904403	2.51536	4.44816	0.00267638	0.00807521	-2.17536	FBgn0028704	Nckx30C
0.90406	5.50868	10.4867	1.14839e-05	0.000219372	3.54594	FBgn0034644	CG10082
0.903179	5.92179	3.19153	0.0143828	0.0305493	-4.27946	FBgn0034291	CG5770
0.903047	7.51175	7.52167	0.000108178	0.000821154	1.11785	FBgn0058263	MFS17
0.90193	3.1177	6.17291	0.000384506	0.0019129	-0.154501	FBgn0039054	CG13830
0.900862	4.76596	7.78696	8.61005e-05	0.000714043	1.32814	FBgn0261238	Alh
0.900387	3.50939	8.54307	4.64345e-05	0.000490691	2.12246	FBgn0032726	CG10621
0.900232	3.61786	8.11823	6.53111e-05	0.000603975	1.73254	FBgn0013771	Cyp6a9
0.899825	6.87716	7.31392	0.00012994	0.000925626	0.892971	FBgn0012034	AcCoAS
0.898833	-0.808637	3.35146	0.0114671	0.0254319	-3.0155	FBgn0016053	pgc
0.898664	7.70857	8.40995	5.15929e-05	0.000521564	1.94401	FBgn0052476	mthl14
0.897663	2.33779	6.84659	0.000199289	0.00123354	0.696857	FBgn0036760	CG5567
0.897414	7.90742	5.51628	0.000768057	0.00317303	-1.03268	FBgn0013681	mt:ND3
0.89582	2.50457	7.51508	0.000108802	0.000822889	1.3326	FBgn0031981	CG7466
0.895774	5.74117	8.18165	6.20114e-05	0.000589142	1.68066	FBgn0039532	Mtl
0.895515	3.48504	8.76879	3.89599e-05	0.000443922	2.31908	FBgn0045852	ham
0.893985	5.44775	7.04737	0.000165394	0.00108169	0.590521	FBgn0013673	mt:ATPase8
0.89278	6.63354	9.93053	1.67099e-05	0.000270628	3.15563	FBgn0052264	CG32264
0.89126	9.82567	7.90176	7.81537e-05	0.000671176	1.55903	FBgn0261552	ps
0.890707	5.70724	9.72357	1.93038e-05	0.000292501	2.97319	FBgn0036165	chrb
0.890035	4.53681	6.85689	0.000197372	0.00122599	0.421699	FBgn0263234	Phae1
0.889138	5.43869	10.2893	1.30923e-05	0.000235368	3.40064	FBgn0030245	CG1637
0.888356	4.89568	5.40756	0.000865855	0.00346187	-1.22961	FBgn0003189	r
0.887686	6.47182	9.9668	1.62971e-05	0.000267333	3.17835	FBgn0264357	SNF4Agamma
0.887384	2.23785	7.15784	0.000149529	0.00102111	1.0288	FBgn0010382	CycE
0.887374	5.8488	8.48798	4.84953e-05	0.000505891	1.95486	FBgn0035896	CG6983
0.885951	-1.15761	3.11506	0.0160469	0.033417	-3.29287	FBgn0026403	Ndg
0.885672	4.28897	5.52531	0.000760508	0.00315058	-1.04941	FBgn0036994	CG5199
0.885525	8.5445	8.87057	3.60405e-05	0.000423453	2.37049	FBgn0002121	l(2)gl
0.884574	4.49463	8.67594	4.18571e-05	0.000463696	2.14209	FBgn0032076	CG9510
0.88455	7.54587	7.13522	0.000152633	0.00103296	0.73803	FBgn0035425	CG17746
0.883454	0.198061	4.27353	0.0033341	0.00955041	-1.93048	FBgn0264087	Slob
0.882894	9.23925	5.70898	0.00062342	0.00270369	-0.750868	FBgn0021872	Xbp1
0.882067	6.30296	8.79209	3.82687e-05	0.000439749	2.22862	FBgn0022382	Pka-R2
0.881661	5.13618	9.16748	2.88376e-05	0.000365017	2.52887	FBgn0025574	Pli
0.880175	1.94046	6.19758	0.000375025	0.00188249	0.0751885	FBgn0004359	T48
0.878191	6.9905	5.43475	0.000840167	0.00338338	-1.16489	FBgn0033382	Hydr1
0.878106	3.96102	5.8504	0.000536519	0.00244843	-0.633246	FBgn0023531	CG32809
0.876486	7.03887	7.69019	9.35078e-05	0.000751119	1.26297	FBgn0035772	Sh3beta
0.876465	9.70884	7.04386	0.000165926	0.00108279	0.724426	FBgn0261822	Bsg
0.875294	3.50988	7.95769	7.45832e-05	0.000651783	1.59901	FBgn0002522	lab
0.875218	5.7734	9.54022	2.19858e-05	0.000309045	2.83005	FBgn0033494	KCNQ
0.875146	5.58358	5.15436	0.00115171	0.0043257	-1.55171	FBgn0085484	Pdxk
0.874399	5.946	9.8235	1.79987e-05	0.000284793	3.05462	FBgn0037843	CG4511
0.874395	3.83672	8.43503	5.05734e-05	0.000516431	1.98992	FBgn0036826	arx
0.874341	1.51901	5.79185	0.000570747	0.00254996	-0.304328	FBgn0020633	Mcm7
0.874273	7.65606	6.55397	0.0002635	0.00148632	0.138049	FBgn0053181	CG33181
0.874253	5.31186	8.14086	6.41115e-05	0.000599537	1.64129	FBgn0037239	CG11739
0.873869	7.70254	9.13905	2.94521e-05	0.000370847	2.56372	FBgn0010516	wal
0.871784	7.24325	5.77269	0.00058247	0.0025894	-0.752314	FBgn0052687	CG32687
0.871248	7.91938	7.04663	0.000165506	0.00108169	0.661784	FBgn0031190	CG12576
0.869948	6.09163	9.20951	2.79556e-05	0.000360639	2.57055	FBgn0037705	mura
0.867863	0.447491	3.75887	0.00654239	0.0161844	-2.70433	FBgn0041723	rho-5
0.867228	3.30722	6.39214	0.000308748	0.00165064	0.0586998	FBgn0051201	GluRIIE
0.86695	4.84825	8.73234	4.00694e-05	0.000451396	2.17197	FBgn0029789	CG3160
0.865874	4.4183	7.46249	0.00011393	0.000850739	1.03798	FBgn0039466	CG5521
0.86409	5.0445	9.43374	2.37348e-05	0.000323952	2.74614	FBgn0035390	scramb2
0.86316	1.27081	5.15875	0.00114594	0.00430629	-1.01332	FBgn0040253	Ugt86Dg
0.863	3.47425	8.43977	5.03836e-05	0.000516431	2.03625	FBgn0051601	CG31601
0.861456	5.59456	6.73356	0.000221751	0.00133859	0.266427	FBgn0028538	Sec71
0.861363	3.7057	8.96572	3.35322e-05	0.0004051	2.45796	FBgn0053120	CG33120
0.859251	3.97246	3.83354	0.00591835	0.0149844	-3.25729	FBgn0026239	gukh
0.858776	5.3386	9.39975	2.43257e-05	0.000328446	2.71506	FBgn0261461	RhoGAP18B
0.857605	6.79429	8.13055	6.46553e-05	0.000600905	1.66327	FBgn0002719	Men
0.857205	0.995594	3.70841	0.0070043	0.0170902	-2.90284	FBgn0033481	CG12920
0.8571	3.89608	8.39788	5.20916e-05	0.000523846	1.9507	FBgn0040233	cana
0.856549	0.542972	3.94346	0.00511402	0.0133487	-2.46504	FBgn0002948	nod
0.855687	4.70803	6.2254	0.000364641	0.00184477	-0.267905	FBgn0027843	CAH2
0.855216	3.35695	7.13992	0.000151982	0.00103016	0.833236	FBgn0023536	CG3156
0.8551	5.72633	9.01493	3.23124e-05	0.000395207	2.40277	FBgn0032078	C1GalTA
0.853589	4.9856	9.53169	2.21203e-05	0.000309573	2.82537	FBgn0032938	CG8671
0.853165	0.488411	3.85598	0.0057436	0.0146373	-2.5761	FBgn0261059	Sfp78E
0.853087	6.85622	9.51457	2.23934e-05	0.000311441	2.83903	FBgn0267336	Glut4EF
0.852394	0.0237416	3.8061	0.0061399	0.0154014	-2.54036	FBgn0000996	dup
0.851823	-0.0672411	3.91366	0.00531963	0.0137449	-2.36852	FBgn0051002	CG31002
0.851621	1.19644	4.62646	0.00214848	0.00685245	-1.67847	FBgn0003448	sna
0.850839	5.35568	9.92641	1.67575e-05	0.000270909	3.12748	FBgn0030685	Graf
0.850208	0.556358	3.07163	0.0170818	0.03509	-3.74175	FBgn0003866	tsh
0.849136	5.72519	7.995	7.23032e-05	0.000638726	1.50994	FBgn0260003	Dys
0.849129	3.94081	8.04007	6.96527e-05	0.000623943	1.62461	FBgn0004394	pdm2
0.848637	7.78047	8.28111	5.72066e-05	0.000556504	1.83215	FBgn0013770	Cp1
0.848423	0.254266	4.02779	0.00457742	0.0122742	-2.28111	FBgn0033190	CG2137
0.848034	4.29184	8.6224	4.36374e-05	0.000476336	2.10992	FBgn0029121	Sras
0.847845	-1.21818	2.9548	0.0202317	0.0402383	-3.51846	FBgn0039106	CG10301
0.847351	3.558	7.93228	7.61823e-05	0.000660592	1.56906	FBgn0027558	pgant3
0.845951	4.74371	8.5118	4.75917e-05	0.000498793	1.98528	FBgn0250788	beta-Spec
0.845852	7.59862	8.36246	5.35864e-05	0.000535265	1.89825	FBgn0051523	CG31523
0.845413	9.74658	8.09465	6.65879e-05	0.000607445	1.73353	FBgn0086687	Desat1
0.844213	5.25201	8.31434	5.56956e-05	0.000545366	1.79746	FBgn0032131	CG3841
0.844179	-0.136641	3.38117	0.0109986	0.0245942	-3.11741	FBgn0261588	pdm3
0.843919	4.68032	6.61455	0.000248508	0.00143593	0.157536	FBgn0037856	Leash
0.843679	5.43653	8.72354	4.03426e-05	0.000453664	2.15423	FBgn0028480	CG17841
0.843661	4.55438	8.79737	3.8114e-05	0.000439749	2.24147	FBgn0053052	CG33052
0.843298	5.0919	8.96348	3.35889e-05	0.0004051	2.3603	FBgn0037934	CG6830
0.842267	4.44151	9.39672	2.43792e-05	0.000328446	2.74332	FBgn0000228	Bsg25D
0.841548	3.55236	7.55035	0.000105509	0.000809655	1.20995	FBgn0087002	Rfabg
0.840163	0.788889	2.99628	0.0190485	0.0383199	-3.91082	FBgn0032023	CG14274
0.838852	1.74828	3.122	0.0158877	0.033186	-3.9321	FBgn0034290	CG5773
0.837765	5.36127	8.06086	6.84671e-05	0.000617945	1.56781	FBgn0051248	CG31248
0.837612	5.93853	6.91702	0.000186586	0.00117719	0.463146	FBgn0034400	CG15099
0.837602	3.15519	7.86611	8.05299e-05	0.000685002	1.56192	FBgn0004381	Klp68D
0.837348	0.880811	4.98099	0.00140726	0.00500236	-1.15528	FBgn0033872	CG6329
0.836746	4.06638	5.29195	0.000985254	0.00383297	-1.3138	FBgn0027070	CG17322
0.83657	4.34191	6.82161	0.000204025	0.00125705	0.398132	FBgn0262870	axo
0.836138	5.66336	7.65523	9.63577e-05	0.000762634	1.1906	FBgn0003731	Egfr
0.836131	4.26693	7.09027	0.000159018	0.00106094	0.680109	FBgn0021967	Pdsw
0.835783	5.81896	8.76579	3.905e-05	0.000443922	2.19418	FBgn0032715	CG17597
0.835041	2.60873	6.58533	0.000255616	0.001463	0.376297	FBgn0266916	Cenp-C
0.834804	6.9809	7.38291	0.000122211	0.000893349	0.96451	FBgn0001168	h
0.834627	7.85121	4.82294	0.00169561	0.00574413	-1.90404	FBgn0032336	AstC
0.834363	7.29891	7.06839	0.000162234	0.00107197	0.661954	FBgn0031912	CG5261
0.833964	-1.02222	2.95329	0.020276	0.0403175	-3.55975	FBgn0051708	CG31708
0.832463	3.98592	7.93019	7.63155e-05	0.000661105	1.5189	FBgn0026371	SAK
0.830822	2.67825	6.55639	0.000262883	0.0014851	0.333478	FBgn0031703	CG12512
0.830705	4.65034	8.46722	4.92984e-05	0.000511188	1.95093	FBgn0036240	CG6928
0.830591	6.11378	8.17733	6.22302e-05	0.000589966	1.68433	FBgn0024321	NK7.1
0.830073	2.98966	7.16679	0.00014832	0.0010153	0.913318	FBgn0004644	hh
0.830054	1.34992	4.81747	0.0017067	0.00577514	-1.46154	FBgn0030905	CG15059
0.829597	7.9016	7.87131	8.01786e-05	0.000683485	1.46287	FBgn0039358	CG5028
0.829283	4.13186	8.54576	4.63363e-05	0.000490547	2.05677	FBgn0040308	Jafrac2
0.828879	8.74771	8.59896	4.44438e-05	0.000480958	2.14652	FBgn0260960	Baldspot
0.828537	5.64053	8.67138	4.20057e-05	0.000464191	2.11073	FBgn0264078	Flo2
0.827976	4.43604	8.38565	5.26021e-05	0.000528101	1.89227	FBgn0266377	Pde8
0.827105	5.12136	8.58246	4.50211e-05	0.00048376	2.03489	FBgn0264855	AP-2alpha
0.826824	7.53386	8.12977	6.46966e-05	0.000600905	1.68756	FBgn0027287	Gmap
0.826161	-0.35178	2.82895	0.024318	0.046663	-3.89101	FBgn0047334	BG642312
0.826092	5.99637	8.54494	4.6366e-05	0.000490547	2.00749	FBgn0264089	sli
0.825989	7.81272	6.07784	0.000423632	0.00205272	-0.380704	FBgn0263593	Lpin
0.825917	6.14935	7.63686	9.78946e-05	0.000771157	1.18311	FBgn0030735	CG3632
0.824824	-0.165847	3.51043	0.00918623	0.0211826	-2.92248	FBgn0037736	CG12950
0.824515	0.0729708	3.63199	0.00777196	0.0185432	-2.80096	FBgn0030331	CG15221
0.824026	1.674	5.92367	0.00049686	0.00232018	-0.18339	FBgn0053080	CG33080
0.823345	6.28217	9.06027	3.12328e-05	0.000386664	2.45285	FBgn0032727	CG10623
0.823111	6.91141	8.27385	5.75428e-05	0.000559166	1.79632	FBgn0063491	GstE9
0.821701	7.15072	7.78714	8.60878e-05	0.000714043	1.35837	FBgn0052066	CG32066
0.820341	1.54481	3.96968	0.00494019	0.0130231	-2.64785	FBgn0036368	CG10738
0.819943	9.11831	4.8855	0.00157435	0.00543174	-1.77201	FBgn0003748	Treh
0.819929	7.27471	6.8461	0.000199381	0.00123354	0.432985	FBgn0036816	Indy
0.818831	9.35925	8.11983	6.52256e-05	0.000603975	1.74435	FBgn0027291	l(1)G0156
0.81768	-0.22648	3.36199	0.0112986	0.0251643	-3.12571	FBgn0039170	CG13609
0.817603	7.77272	5.82057	0.000553665	0.0024961	-0.677405	FBgn0035904	GstO3
0.817115	5.44019	6.14508	0.000395527	0.00195252	-0.374976	FBgn0020389	Papss
0.816538	3.56257	5.17606	0.0011235	0.00423623	-1.39872	FBgn0033301	CG12780
0.816325	4.74495	8.37147	5.32016e-05	0.000532612	1.86133	FBgn0033466	Pal1
0.816317	6.17541	7.55637	0.000104959	0.000807444	1.10657	FBgn0026787	Nhe1
0.816073	6.31527	7.38164	0.000122349	0.000893629	0.940892	FBgn0001089	Gal
0.815676	6.40721	5.70913	0.000623322	0.00270369	-0.856696	FBgn0037757	CG8516
0.815104	3.8064	7.39088	0.000121352	0.000889255	1.02489	FBgn0013997	Nrx-IV
0.814034	7.10118	7.29231	0.000132472	0.000939173	0.879442	FBgn0027580	CG1516
0.812719	4.77927	6.94142	0.000182397	0.00115729	0.494418	FBgn0263110	CG43367
0.810982	0.571692	4.10443	0.00414263	0.011357	-2.24811	FBgn0034860	CG9812
0.810952	7.40655	7.91513	7.72833e-05	0.000666261	1.48647	FBgn0262124	uex
0.810405	4.91433	6.38329	0.000311462	0.00165841	-0.102988	FBgn0038039	CG5196
0.81017	4.83835	9.05866	3.12705e-05	0.000386664	2.44638	FBgn0030522	CG11103
0.809984	5.41858	9.2626	2.68848e-05	0.000351446	2.60367	FBgn0030141	Gga
0.809363	6.15109	7.46566	0.000113613	0.000849247	1.01808	FBgn0026061	Mipp1
0.809217	5.09528	7.98537	7.28841e-05	0.000642587	1.50119	FBgn0029994	CG2254
0.808801	3.18602	7.68918	9.35893e-05	0.000751119	1.39148	FBgn0015316	Try29F
0.808737	3.68753	5.36536	0.000907472	0.00359451	-1.18057	FBgn0033337	CG8272
0.808613	6.61294	5.61839	0.000687257	0.002905	-0.957298	FBgn0036566	ClC-c
0.807326	4.13261	7.37808	0.000122735	0.000895518	0.978222	FBgn0052699	CG32699
0.806817	6.10676	6.48331	0.000282276	0.00156245	0.00901407	FBgn0029828	CG6067
0.806782	0.501899	2.85451	0.0234232	0.0451983	-4.05717	FBgn0032495	CG16820
0.806508	3.34587	5.83929	0.000542836	0.00246218	-0.569296	FBgn0086608	CG34112
0.805577	8.86506	7.34257	0.000126665	0.000916911	0.99365	FBgn0031285	CG3662
0.804763	3.45725	7.95793	7.45682e-05	0.000651783	1.60498	FBgn0020621	Pkn
0.803396	8.66056	5.72363	0.00061373	0.00267752	-0.755972	FBgn0053113	Rtnl1
0.803031	2.75373	7.20002	0.000143926	0.000993592	0.983247	FBgn0037646	CAHbeta
0.802647	5.68932	8.57475	4.52939e-05	0.000484943	2.02773	FBgn0053144	CG33144
0.802582	3.39917	6.87082	0.000194812	0.00121583	0.552742	FBgn0033984	Lap1
0.802525	6.49012	7.44423	0.000115773	0.000859642	1.00764	FBgn0010434	cora
0.802148	8.05482	7.69907	9.27992e-05	0.000748759	1.30667	FBgn0033659	Damm
0.801987	5.09253	6.93802	0.000182974	0.00115931	0.480975	FBgn0052758	CG32758
0.801877	3.78963	5.03113	0.00132745	0.0047949	-1.61052	FBgn0037485	CG14606
0.801486	7.33331	6.39366	0.000308284	0.00165034	-0.0468521	FBgn0259935	CG42458
0.801078	4.89696	6.60831	0.000250007	0.00144105	0.140713	FBgn0036501	CG7272
0.80034	6.4309	7.57317	0.000103438	0.000799252	1.1305	FBgn0262518	Rab8
0.798923	5.07717	7.27767	0.000134219	0.000946306	0.824602	FBgn0036756	cln3
0.798648	1.01678	3.84219	0.00585034	0.0148558	-2.71725	FBgn0001229	Hsp67Bc
0.798325	4.95888	6.27281	0.000347679	0.00179155	-0.226369	FBgn0266720	Snap24
0.798048	7.92988	8.43306	5.06528e-05	0.000516431	1.9719	FBgn0013733	shot
0.797909	7.0158	5.48311	0.000796532	0.00325904	-1.10525	FBgn0036411	Sox21a
0.796875	4.73747	8.46454	4.94034e-05	0.000511188	1.94353	FBgn0028539	CG31731
0.796401	3.94596	5.16	0.00114429	0.00430373	-1.46584	FBgn0002571	Mal-A3
0.796086	3.58891	6.44329	0.000293572	0.00159741	0.0748191	FBgn0016715	Reg-2
0.795925	4.63133	7.74933	8.89003e-05	0.000729815	1.29824	FBgn0085421	Epac
0.795879	8.58295	7.25946	0.000136427	0.000956596	0.900702	FBgn0019886	Letm1
0.795879	4.0228	8.10825	6.58485e-05	0.000604388	1.67806	FBgn0029094	asf1
0.795733	3.0411	5.86899	0.000526131	0.00241352	-0.489127	FBgn0052251	Claspin
0.795661	5.00119	6.95243	0.000180542	0.00114961	0.497756	FBgn0038828	CG17270
0.794803	5.00235	7.40399	0.000119954	0.000881174	0.950731	FBgn0033814	CG4670
0.794784	3.54665	6.68989	0.000231177	0.00137141	0.3439	FBgn0032699	CG10383
0.794383	0.0829188	3.35947	0.0113387	0.0252346	-3.20055	FBgn0028996	onecut
0.79376	8.18867	7.30542	0.000130929	0.000929709	0.930939	FBgn0037094	CG7611
0.793749	1.47934	4.68811	0.00199349	0.00646888	-1.65623	FBgn0003388	shd
0.792945	6.87509	6.46032	0.000288704	0.00158054	0.00946006	FBgn0032889	CG9331
0.79188	5.58834	6.95095	0.000180791	0.00115037	0.491991	FBgn0259143	CG42258
0.79167	3.19409	7.14742	0.00015095	0.00102658	0.862971	FBgn0052262	CG32262
0.790571	5.16197	7.47321	0.000112863	0.000845763	1.01481	FBgn0033915	CG8485
0.790033	1.91945	3.06763	0.0171807	0.0352608	-4.05043	FBgn0034797	nahoda
0.789837	-0.673034	3.13224	0.0156559	0.0328092	-3.36705	FBgn0024227	aurB
0.789413	1.60098	5.02008	0.00134461	0.00484771	-1.25349	FBgn0003087	pim
0.788209	7.16806	7.08586	0.000159661	0.00106278	0.675107	FBgn0261556	CG42674
0.787865	10.3085	6.63017	0.000244798	0.00142277	0.312428	FBgn0027779	VhaSFD
0.785415	5.25718	7.56199	0.000104447	0.00080496	1.09978	FBgn0032474	DnaJ-H
0.78425	0.57413	3.82119	0.00601697	0.0151825	-2.64693	FBgn0033845	mars
0.78258	1.66383	3.91849	0.00528573	0.0136923	-2.74562	FBgn0039852	nyo
0.782402	1.03687	3.83609	0.00589822	0.0149506	-2.73027	FBgn0013342	nSyb
0.782366	4.30609	6.35863	0.000319166	0.00168837	-0.0944956	FBgn0030817	CG4991
0.782118	5.55691	6.12034	0.000405619	0.00198822	-0.402453	FBgn0034032	CG8195
0.782035	2.15244	5.76635	0.000586411	0.00260303	-0.454073	FBgn0024991	CG2694
0.781797	7.31287	8.52396	4.71379e-05	0.000495779	2.03062	FBgn0086901	cv-c
0.781206	6.18812	8.43956	5.03918e-05	0.000516431	1.92002	FBgn0085432	pan
0.78115	1.84387	3.35921	0.0113429	0.0252373	-3.59741	FBgn0027343	fz3
0.780985	5.19156	6.37822	0.00031303	0.00166577	-0.115511	FBgn0004893	bowl
0.779895	4.92334	7.91618	7.72151e-05	0.000666261	1.44116	FBgn0037788	CG3940
0.77955	8.69123	7.05246	0.000164622	0.00108056	0.697297	FBgn0038740	CG4562
0.779179	3.01043	6.78324	0.000211548	0.00129271	0.5183	FBgn0036319	Ent3
0.778267	0.994131	4.41432	0.00279181	0.00835861	-1.91936	FBgn0040780	Atg10
0.778001	6.82343	5.84546	0.00053932	0.0024544	-0.682557	FBgn0036770	Prestin
0.777557	6.79746	5.52246	0.000762878	0.00315747	-1.06568	FBgn0033138	Tsp42Eq
0.777531	4.18876	7.94261	7.55276e-05	0.000656826	1.5105	FBgn0023076	Clk
0.77733	6.75378	8.33507	5.47757e-05	0.000541419	1.84556	FBgn0058191	CG40191
0.776672	5.63791	5.69355	0.00063381	0.00273204	-0.894327	FBgn0015513	mbc
0.77665	5.34457	6.36261	0.000317909	0.00168371	-0.133783	FBgn0000008	a
0.776566	4.77919	8.04455	6.93952e-05	0.00062226	1.56482	FBgn0036059	nudE
0.776404	2.16509	3.10188	0.0163538	0.0338825	-4.04873	FBgn0031629	Clect27
0.77635	5.91326	7.9266	7.65451e-05	0.000662452	1.44982	FBgn0029849	Efr
0.775336	5.06468	5.78963	0.000572093	0.00255342	-0.779237	FBgn0020235	ATPsyn-gamma
0.774951	5.59217	6.49742	0.000278411	0.001545	0.0139039	FBgn0028394	CG17834
0.773714	5.18429	8.68595	4.15334e-05	0.000462402	2.12263	FBgn0261553	CG42671
0.773186	5.82289	7.62688	9.87405e-05	0.000774333	1.16565	FBgn0026593	CG5707
0.773161	1.90898	5.70708	0.000624685	0.00270597	-0.477935	FBgn0038511	CG5873
0.771704	5.17879	5.86507	0.000528304	0.00242207	-0.693776	FBgn0085408	Shroom
0.770563	6.72262	7.95993	7.44443e-05	0.000651783	1.50464	FBgn0261722	fwe
0.770173	4.76939	4.6376	0.00211952	0.00678428	-2.20812	FBgn0001224	Hsp23
0.769852	2.64204	5.74119	0.00060233	0.00264804	-0.57154	FBgn0038223	Afti
0.769808	1.87451	5.62594	0.000681672	0.00288412	-0.566829	FBgn0034614	CG9752
0.769777	3.71634	7.15928	0.000149333	0.00102111	0.80513	FBgn0029894	CG14440
0.768931	1.94321	4.9976	0.00138026	0.00494173	-1.34896	FBgn0011239	ms(2)35Ci
0.768709	1.8174	4.63394	0.002129	0.0068073	-1.7952	FBgn0035084	CG15861
0.768534	5.21109	7.52862	0.000107525	0.000818106	1.06776	FBgn0030432	CG4404
0.76839	5.19116	8.57549	4.52679e-05	0.000484943	2.02709	FBgn0027506	EDTP
0.768341	3.32135	6.63597	0.000243436	0.00141688	0.317144	FBgn0029835	CG5921
0.767438	7.89072	7.0668	0.000162472	0.00107275	0.681025	FBgn0264975	Nrg
0.767319	5.90954	2.92141	0.0212403	0.0417888	-4.69092	FBgn0034289	CG10910
0.766512	1.69556	4.75902	0.00183024	0.00606747	-1.6071	FBgn0032521	CG7110
0.766486	-0.441038	3.13288	0.0156416	0.0327869	-3.41671	FBgn0263656	CG43647
0.766333	7.74544	7.79551	8.54785e-05	0.000711525	1.38645	FBgn0031213	galectin
0.765333	8.06457	7.03347	0.000167519	0.00109005	0.653635	FBgn0031969	pes
0.764726	2.10808	4.26088	0.00338821	0.00966208	-2.35554	FBgn0003447	sn
0.763801	0.545812	3.54285	0.00878391	0.0204128	-3.04206	FBgn0053519	Unc-89
0.763539	4.83795	8.78139	3.85843e-05	0.000441669	2.21305	FBgn0027528	CG9634
0.762645	3.87016	7.7076	9.21239e-05	0.000745248	1.32186	FBgn0261703	gce
0.762619	2.51966	5.5276	0.000758603	0.00314663	-0.802819	FBgn0035699	CG13300
0.762343	6.851	6.71551	0.000225593	0.00135265	0.281425	FBgn0036199	Bmcp
0.761995	1.13566	4.75474	0.00183966	0.0060868	-1.49968	FBgn0069969	CG40498
0.760448	6.15011	8.0047	7.17238e-05	0.000636162	1.5277	FBgn0015797	Rab6
0.760303	7.79941	4.65047	0.00208661	0.00670054	-2.13293	FBgn0010425	epsilonTry
0.760108	3.94496	6.58155	0.000256553	0.00146649	0.181262	FBgn0038912	CG6656
0.759984	8.74258	6.79887	0.000208446	0.0012755	0.438518	FBgn0013576	mtd
0.759476	0.769327	3.19797	0.0142511	0.0303202	-3.60408	FBgn0036294	CG10654
0.758416	4.62789	8.00151	7.19138e-05	0.000637175	1.53295	FBgn0259678	sqa
0.758243	0.405914	2.96781	0.0198525	0.0396163	-3.86328	FBgn0030979	CG14190
0.758163	6.03579	7.94291	7.55088e-05	0.000656826	1.46762	FBgn0019972	Drice
0.757778	7.17465	5.37234	0.000900445	0.00357607	-1.23442	FBgn0051715	CG31715
0.756373	5.80033	5.89417	0.00051242	0.00237482	-0.657385	FBgn0010053	Jheh1
0.755996	1.56559	4.40161	0.00283656	0.00845013	-2.05555	FBgn0038397	CG10185
0.755718	6.76193	8.14599	6.38432e-05	0.000598819	1.67615	FBgn0038053	CG18549
0.754791	5.82734	8.65374	4.25851e-05	0.000469434	2.098	FBgn0036298	nst
0.754636	3.6549	3.94473	0.00510547	0.0133303	-3.06076	FBgn0017561	Ork1
0.753215	3.40867	4.95986	0.00144248	0.00509512	-1.65179	FBgn0037845	CG14694
0.753014	6.66056	6.19546	0.000375828	0.00188547	-0.289681	FBgn0039697	CG7834
0.752599	6.7402	6.25582	0.000353656	0.00181081	-0.219646	FBgn0036801	MYPT-75D
0.751774	4.14403	5.38856	0.000884332	0.00352471	-1.20397	FBgn0051469	CG31469
0.749976	7.275	7.01249	0.000170786	0.001104	0.604255	FBgn0264495	gpp
0.749943	5.79655	8.22741	5.97463e-05	0.000575573	1.72203	FBgn0004652	fru
0.74938	6.33638	6.12801	0.000402458	0.00198017	-0.376366	FBgn0034490	CG9864
0.74881	10.2076	6.10184	0.000413351	0.00201878	-0.26766	FBgn0013272	Gp150
0.748103	8.12144	6.20317	0.000372914	0.00187717	-0.228394	FBgn0004179	Csp
0.747967	2.48125	5.49239	0.000788449	0.00323782	-0.838589	FBgn0033502	CG12910
0.747472	5.09333	3.58961	0.00823648	0.0194169	-3.68984	FBgn0013683	mt:ND4L
0.747434	5.82449	5.83567	0.000544913	0.00246784	-0.724768	FBgn0032845	CG10747
0.745663	5.9975	6.07275	0.000425847	0.00206234	-0.448754	FBgn0259111	Ndae1
0.743922	14.2913	6.56852	0.000259809	0.00148036	0.339154	FBgn0013672	mt:ATPase6
0.741841	6.88049	7.07229	0.000161657	0.00107068	0.651307	FBgn0086377	Syx7
0.741656	4.01294	7.1725	0.000147554	0.00101083	0.785721	FBgn0037949	CG17360
0.740024	6.37607	8.10608	6.59659e-05	0.000604388	1.62711	FBgn0263995	cpo
0.738959	3.27818	6.13495	0.000399622	0.00197056	-0.223432	FBgn0015576	alpha-Est8
0.737452	2.60729	6.11621	0.000407328	0.00199535	-0.136588	FBgn0053346	CG33346
0.73737	6.58566	7.85463	8.13124e-05	0.000687515	1.40217	FBgn0052529	Hers
0.736809	6.19759	8.2506	5.86343e-05	0.000567921	1.75225	FBgn0030089	AP-1gamma
0.736523	6.5539	6.67749	0.000233935	0.00138045	0.230789	FBgn0001248	Idh
0.735957	5.39564	7.95082	7.50116e-05	0.000654248	1.46573	FBgn0052062	A2bp1
0.735083	5.21908	7.24662	0.00013801	0.000963017	0.790747	FBgn0037363	Atg17
0.734988	8.80166	7.39993	0.000120385	0.00088361	1.04745	FBgn0005630	lola
0.734753	5.88764	7.11111	0.000156021	0.00104875	0.659858	FBgn0003870	ttk
0.734642	4.96319	8.17277	6.24617e-05	0.000590907	1.67449	FBgn0031990	CG8552
0.733471	2.03616	5.42026	0.000853753	0.00342574	-0.84355	FBgn0052694	CG32694
0.733233	8.22967	6.64143	0.000242164	0.00141407	0.252583	FBgn0031813	CG9527
0.732867	4.10553	7.26094	0.000136247	0.000956596	0.864455	FBgn0039110	RanBP3
0.731477	1.79986	4.62665	0.00214799	0.00685245	-1.802	FBgn0037481	MAGE
0.731046	4.19525	7.62783	9.86597e-05	0.000774333	1.21364	FBgn0038312	Zip88E
0.73096	2.51799	5.79664	0.000567861	0.00254223	-0.485593	FBgn0085412	CG34383
0.730877	2.01648	4.6825	0.00200708	0.00649649	-1.77084	FBgn0035392	CG1271
0.730839	4.98506	5.52563	0.000760238	0.00315058	-1.09126	FBgn0060296	pain
0.73071	6.05958	6.12026	0.00040565	0.00198822	-0.39345	FBgn0033980	Cyp6a20
0.730626	2.44043	5.84518	0.000539474	0.0024544	-0.41582	FBgn0040507	ACXD
0.730251	3.10685	5.71168	0.000621623	0.00270034	-0.683659	FBgn0085383	CG34354
0.730197	5.14935	7.53629	0.000106808	0.000816123	1.07557	FBgn0035023	ITP
0.730032	5.65545	7.47353	0.000112832	0.000845763	1.01501	FBgn0035371	CG9977
0.729946	-0.359416	2.89946	0.021932	0.0428572	-3.78426	FBgn0038262	CG14857
0.72891	4.77499	5.15371	0.00115255	0.0043257	-1.54125	FBgn0030148	CG3106
0.728575	9.41954	6.54353	0.000266185	0.00149514	0.193554	FBgn0069923	CG41128
0.728554	10.9532	6.22849	0.000363509	0.00184123	-0.107398	FBgn0000416	Sap-r
0.728369	3.93502	7.08509	0.000159773	0.00106278	0.705541	FBgn0033113	Spn42Dc
0.727848	-0.41808	2.88923	0.0222624	0.0433513	-3.7863	FBgn0035267	CG13921
0.72764	6.52687	6.50377	0.000276692	0.00153737	0.0441508	FBgn0039326	CG10562
0.727349	6.40434	7.19395	0.000144719	0.00099672	0.757419	FBgn0015278	Pi3K68D
0.725442	7.90382	7.14723	0.000150976	0.00102658	0.762623	FBgn0019968	Khc-73
0.724597	7.36985	7.58916	0.000102014	0.000790297	1.17785	FBgn0264785	Hph
0.724353	2.86702	3.4425	0.010095	0.0229175	-3.67121	FBgn0039862	kek6
0.724151	4.16299	6.68088	0.000233177	0.00137779	0.264621	FBgn0031952	cdc14
0.723594	7.9984	6.17988	0.000381802	0.00190156	-0.259145	FBgn0001297	kay
0.72357	8.94424	5.0403	0.00131341	0.00476343	-1.58032	FBgn0031245	CG3625
0.723453	2.43462	5.56763	0.000726179	0.00303763	-0.740396	FBgn0038975	Nrx-1
0.722601	7.71845	5.85329	0.00053489	0.00244802	-0.641494	FBgn0259740	CG42394
0.722275	0.499446	3.14908	0.0152825	0.0321245	-3.61359	FBgn0035155	RabX6
0.72087	2.60616	4.29607	0.00324005	0.00934991	-2.40217	FBgn0038873	CG5892
0.719951	4.60057	6.87453	0.000194136	0.00121369	0.433918	FBgn0033055	Tbce
0.719749	5.16372	6.84113	0.000200315	0.0012376	0.37845	FBgn0085376	CG34347
0.719319	4.48186	7.10869	0.000156366	0.00104949	0.681068	FBgn0035558	CG11357
0.71927	2.82985	3.73972	0.00671369	0.0165235	-3.22832	FBgn0030787	CG9609
0.719087	5.42525	6.35941	0.000318921	0.00168807	-0.13769	FBgn0262103	Sik3
0.718871	5.65751	8.33112	5.49498e-05	0.000541419	1.81266	FBgn0011481	Ssdp
0.718578	4.52557	6.81943	0.000204445	0.0012579	0.381197	FBgn0012051	CalpA
0.718459	6.53468	4.26276	0.0033801	0.00964818	-2.70501	FBgn0035495	CG14989
0.718151	3.10381	4.30414	0.00320708	0.00927874	-2.47704	FBgn0038198	Npc2b
0.717191	5.63255	7.59409	0.000101579	0.000788296	1.13109	FBgn0037933	Ho
0.716752	0.0846394	3.26345	0.0129842	0.0280995	-3.34405	FBgn0003386	Shaw
0.716704	5.79759	8.17098	6.2553e-05	0.000591145	1.67106	FBgn0003943	Ubi-p63E
0.71651	4.16904	7.62585	9.88282e-05	0.000774342	1.2139	FBgn0024963	GluClalpha
0.716314	3.71211	5.34378	0.000929609	0.00366433	-1.21124	FBgn0261808	cu
0.716251	5.08532	6.84315	0.000199934	0.0012361	0.382082	FBgn0032935	Atg18b
0.716135	2.84798	6.54495	0.000265817	0.00149514	0.291725	FBgn0030678	CG11679
0.715656	5.02028	8.04776	6.92119e-05	0.000621239	1.55917	FBgn0023215	Mnt
0.71553	5.07838	8.04861	6.9163e-05	0.000621239	1.55871	FBgn0005386	ash1
0.71506	4.02212	7.56709	0.000103985	0.0008025	1.17168	FBgn0031951	r2d2
0.714781	1.52223	4.34732	0.00303679	0.00888381	-2.12108	FBgn0020269	mspo
0.714754	7.7802	6.85634	0.000197475	0.00122599	0.461203	FBgn0262872	milt
0.714514	5.98434	5.53381	0.00075347	0.00312867	-1.07866	FBgn0000261	Cat
0.713543	4.19943	6.26876	0.000349093	0.00179465	-0.184778	FBgn0015663	Dot
0.713433	8.99522	6.09021	0.000418296	0.00203127	-0.32034	FBgn0030396	CG2556
0.712844	3.61154	6.26966	0.000348778	0.00179465	-0.119109	FBgn0033327	PGRP-SC1b
0.712786	6.23951	6.79137	0.000209929	0.0012837	0.340241	FBgn0042135	CG18812
0.712676	4.55355	7.28699	0.000133104	0.000942162	0.854578	FBgn0000719	fog
0.712474	6.55526	7.62887	9.85707e-05	0.000774333	1.18787	FBgn0010470	Fkbp14
0.7121	8.73766	7.0411	0.000166348	0.00108472	0.687586	FBgn0000043	Act42A
0.711354	6.35678	7.73557	8.99491e-05	0.000734884	1.28276	FBgn0050011	gem
0.711263	7.73818	6.39704	0.000307257	0.00164582	-0.0289494	FBgn0002609	E(spl)m3-HLH
0.71122	5.99294	7.08906	0.000159195	0.00106094	0.63978	FBgn0032775	CG17544
0.710576	5.05715	5.42888	0.000845643	0.00340236	-1.21044	FBgn0027581	CG6191
0.710364	6.90628	7.32168	0.000129043	0.000924976	0.901712	FBgn0040005	CG17883
0.709688	7.93144	7.00924	0.000171299	0.00110492	0.623937	FBgn0265082	Cdep
0.709013	7.60227	6.88625	0.000192021	0.00120417	0.485877	FBgn0031968	CG7231
0.708781	5.70494	7.88548	7.9229e-05	0.000679407	1.40756	FBgn0265194	Trpm
0.708532	2.66222	2.98251	0.019433	0.0388951	-4.3267	FBgn0039324	CG10553
0.708313	4.9592	6.54263	0.000266416	0.00149514	0.0672171	FBgn0020307	dve
0.707955	-0.0131258	3.15167	0.0152259	0.0320207	-3.48733	FBgn0039107	CG10300
0.707291	3.57372	5.26385	0.00101696	0.00393407	-1.29207	FBgn0050108	CG30108
0.707224	1.79966	4.40377	0.00282892	0.00844144	-2.10029	FBgn0030683	CG8239
0.707168	5.14846	4.87971	0.00158515	0.00545259	-1.90266	FBgn0023214	edl
0.706993	5.13572	5.14062	0.00116997	0.0043727	-1.56923	FBgn0003507	srp
0.706947	3.50717	5.77282	0.000582391	0.0025894	-0.670661	FBgn0013279	Hsp70Bc
0.706944	7.18635	5.06944	0.00126982	0.00464195	-1.61157	FBgn0038438	Der-2
0.706699	1.50565	4.53018	0.00241771	0.00747382	-1.87145	FBgn0265262	Vha68-1
0.706327	3.75556	5.83267	0.00054664	0.0024715	-0.632471	FBgn0038419	CG14879
0.706265	4.29784	6.23572	0.000360874	0.00183518	-0.230303	FBgn0016059	Sema-1b
0.706023	3.52178	5.26813	0.00101205	0.00391848	-1.27987	FBgn0004512	Mdr49
0.705393	1.87381	4.80645	0.00172927	0.00582725	-1.5814	FBgn0035917	Zasp66
0.705006	3.7844	7.08201	0.000160223	0.00106419	0.718883	FBgn0034883	CG17664
0.704938	6.41959	6.89852	0.000189833	0.00119514	0.457388	FBgn0000382	csw
0.704757	7.23752	7.40406	0.000119947	0.000881174	0.994094	FBgn0031883	Caper
0.704159	9.52272	6.77687	0.000212826	0.00129657	0.443923	FBgn0014184	Oda
0.703664	0.851566	3.25427	0.0131544	0.0283716	-3.54026	FBgn0259994	CG42492
0.703354	8.12795	6.99038	0.000174308	0.00112109	0.612036	FBgn0021979	l(2)k09913
0.702422	4.11544	4.5699	0.0023024	0.00721467	-2.25008	FBgn0262160	CG9932
0.702287	3.98263	6.62827	0.000245245	0.00142277	0.226595	FBgn0029891	Pink1
0.70129	7.6406	7.30243	0.000131279	0.000931455	0.907918	FBgn0086676	spin
0.700869	1.88693	5.10514	0.00121861	0.00449066	-1.20332	FBgn0004839	otk
0.700608	8.57844	6.39954	0.0003065	0.00164374	0.00622298	FBgn0052423	shep
0.699933	0.695114	3.7511	0.00661132	0.0163094	-2.77636	FBgn0051495	CG31495
0.699926	8.01244	5.74097	0.000602475	0.00264804	-0.761639	FBgn0025865	Cortactin
0.699144	0.401573	3.59326	0.00819527	0.0193569	-2.93536	FBgn0033389	Rad51C
0.699047	6.32264	6.78143	0.000211911	0.00129316	0.332419	FBgn0004858	elB
0.698277	4.54765	7.2334	0.00013966	0.000972729	0.801561	FBgn0036684	CG3764
0.698098	5.34715	6.59386	0.000253517	0.00145471	0.115989	FBgn0015789	Rab10
0.698086	7.74727	7.08862	0.000159259	0.00106094	0.697888	FBgn0000173	ben
0.698	7.50901	7.15803	0.000149502	0.00102111	0.759534	FBgn0026315	Ugt35a
0.697832	1.51156	3.16056	0.0150335	0.0316606	-3.82627	FBgn0000099	ap
0.697773	-0.344741	2.92816	0.0210321	0.0414613	-3.74476	FBgn0040763	CG18336
0.697723	5.34099	6.43417	0.000296215	0.00160743	-0.0562425	FBgn0039741	CG7943
0.69638	0.392917	3.10536	0.0162721	0.0337524	-3.65387	FBgn0001075	ft
0.696012	3.75115	6.58323	0.000256136	0.00146504	0.204227	FBgn0038143	CG9813
0.69594	1.22311	4.22407	0.00355113	0.010018	-2.22827	FBgn0002772	Mlc1
0.69563	6.14888	6.90034	0.00018951	0.00119395	0.450824	FBgn0027339	jim
0.694402	6.0051	7.91813	7.70891e-05	0.000665871	1.44374	FBgn0263873	sick
0.692226	3.85304	7.22737	0.00014042	0.000975413	0.856869	FBgn0015269	Nf1
0.69206	5.93743	7.77518	8.6966e-05	0.000719885	1.30854	FBgn0005536	Mbs
0.691555	4.57251	7.43708	0.000116503	0.000862914	1.00083	FBgn0035995	CG3529
0.691281	5.58226	5.65571	0.000660121	0.00281644	-0.940295	FBgn0262508	CG43078
0.691129	3.63686	6.01699	0.000450991	0.00214856	-0.406019	FBgn0085390	Dgk
0.69081	5.51176	7.03537	0.000167227	0.00108966	0.577269	FBgn0085450	Snoo
0.690459	3.61551	5.35817	0.000914783	0.00361865	-1.18146	FBgn0037044	CG10585
0.690233	0.97358	3.29631	0.012394	0.0270447	-3.50614	FBgn0033294	Mal-A4
0.689003	6.67254	4.85678	0.00162878	0.00556201	-1.90331	FBgn0031069	Pmp70
0.688967	5.42049	7.44919	0.000115269	0.000857325	0.989214	FBgn0038662	Mpc1
0.68884	0.142192	2.95259	0.0202967	0.0403348	-3.82323	FBgn0032929	Mcm10
0.688686	10.2497	5.49151	0.000789212	0.00323946	-0.977886	FBgn0032400	CG6770
0.688575	4.88419	7.01009	0.000171165	0.00110492	0.559404	FBgn0028743	Dhit
0.688575	6.37278	7.67062	9.50914e-05	0.000756556	1.22159	FBgn0052137	CG32137
0.688519	6.64789	6.33143	0.000327909	0.0017154	-0.139438	FBgn0031143	CG1532
0.68609	7.53158	6.66376	0.00023703	0.00139267	0.250513	FBgn0051729	CG31729
0.684962	5.09951	6.88597	0.00019207	0.00120417	0.425882	FBgn0020767	Spred
0.683998	5.77125	7.01615	0.000170211	0.00110108	0.560905	FBgn0011205	fbl
0.683488	5.3919	7.06999	0.000161997	0.0010715	0.61195	FBgn0030790	CG4768
0.683445	6.09512	7.87269	8.00855e-05	0.000683485	1.40375	FBgn0086899	tlk
0.683406	8.98338	4.59619	0.00222941	0.0070447	-2.15723	FBgn0036318	Wbp2
0.683055	5.10146	3.46977	0.0097191	0.0222048	-3.8679	FBgn0031580	CG15423
0.682193	2.05122	4.91523	0.0015201	0.00529599	-1.47585	FBgn0052311	zormin
0.682103	1.44219	4.08624	0.0042416	0.0115751	-2.46503	FBgn0035644	DNApol-epsilon58
0.681397	1.75068	4.06836	0.00434137	0.0117898	-2.55283	FBgn0039881	CG1971
0.681134	7.17603	6.24202	0.000358594	0.00182877	-0.21939	FBgn0035444	CG12012
0.68057	8.18068	6.17809	0.000382493	0.00190394	-0.254155	FBgn0261859	CG42788
0.680443	7.11893	5.33531	0.00093846	0.00369271	-1.28189	FBgn0034091	mrj
0.680324	2.97836	5.43903	0.000836205	0.00337198	-0.98924	FBgn0050096	CG30096
0.680138	4.29878	6.09256	0.000417294	0.00202861	-0.390998	FBgn0052112	CG32112
0.679693	5.12662	7.07213	0.000161679	0.00107068	0.616084	FBgn0038325	Atg4b
0.67936	7.41674	7.04973	0.000165034	0.00108139	0.647003	FBgn0035583	CG13704
0.679347	4.74551	7.33178	0.000127887	0.000923516	0.887921	FBgn0036896	wnd
0.678431	0.366832	3.56121	0.00856438	0.0200119	-2.97411	FBgn0024920	Ts
0.678323	2.66963	5.98844	0.000464503	0.00219511	-0.292216	FBgn0025641	DAAM
0.677824	2.07583	3.8966	0.00544139	0.0139897	-2.86096	FBgn0037144	CG7458
0.677441	5.48027	6.67786	0.00023385	0.00138045	0.205634	FBgn0025525	bab2
0.676496	6.48928	6.66347	0.000237096	0.00139267	0.213634	FBgn0034180	Ehbp1
0.676356	5.33557	6.45796	0.000289374	0.00158324	-0.0305225	FBgn0034293	CG14495
0.676216	6.60005	6.55745	0.000262612	0.0014851	0.10436	FBgn0030052	CG12065
0.675839	8.66661	6.6912	0.000230888	0.00137114	0.322556	FBgn0001981	esg
0.67567	5.67161	6.25168	0.000355128	0.00181523	-0.25468	FBgn0266417	CG45057
0.675018	5.73647	5.45047	0.000825702	0.00334623	-1.18483	FBgn0040324	Ephrin
0.67492	0.0110306	2.90347	0.0218037	0.0426533	-3.86573	FBgn0039595	AstA-R2
0.674883	3.72344	4.47951	0.00257407	0.00783794	-2.32751	FBgn0259212	cno
0.674335	10.1758	4.76675	0.00181334	0.00602649	-1.8913	FBgn0003863	alphaTry
0.672202	3.96602	4.01952	0.00462728	0.0123819	-2.99297	FBgn0004380	Klp64D
0.671902	7.29796	6.85146	0.00019838	0.0012299	0.439307	FBgn0050463	CG30463
0.67185	1.90898	4.57607	0.00228502	0.0071753	-1.89106	FBgn0033973	HPS1
0.671743	7.62408	6.42808	0.000297996	0.00161264	0.000759837	FBgn0026179	siz
0.671642	5.68611	6.55606	0.000262966	0.0014851	0.0778585	FBgn0004574	Rop
0.671556	7.11122	6.31828	0.000332234	0.00173188	-0.137328	FBgn0260659	CG42542
0.671148	6.9001	6.80729	0.000206797	0.00126715	0.37946	FBgn0266019	rudhira
0.671114	7.7389	5.92637	0.000495461	0.00231664	-0.55637	FBgn0050015	CG30015
0.670953	2.20612	4.55329	0.00234987	0.00732502	-1.97921	FBgn0033204	CG2065
0.67032	7.3277	6.92259	0.00018562	0.00117417	0.513883	FBgn0033844	bbc
0.670069	2.061	4.32356	0.00312923	0.00909472	-2.2616	FBgn0003149	Prm
0.669918	1.46633	3.96052	0.0050002	0.0131167	-2.6469	FBgn0004374	neb
0.669894	7.9647	6.46849	0.000286401	0.00157193	0.0569811	FBgn0039213	atl
0.669885	8.44219	6.94785	0.000181312	0.00115286	0.580687	FBgn0015795	Rab7
0.669639	4.37415	7.05321	0.000164508	0.00108056	0.632097	FBgn0027603	Ulp1
0.669285	8.46476	2.99002	0.0192222	0.0385702	-4.49239	FBgn0023197	Jon74E
0.668998	4.80726	7.02709	0.000168505	0.00109559	0.579525	FBgn0034733	CG4752
0.668922	2.30362	4.76612	0.0018147	0.00602878	-1.71682	FBgn0038440	Gr89a
0.667792	6.65448	5.54012	0.000748296	0.00311007	-1.04965	FBgn0051721	Trim9
0.667657	1.55127	3.39935	0.0107221	0.024048	-3.47835	FBgn0034782	CG12490
0.667034	6.39331	6.27391	0.000347297	0.00179155	-0.211845	FBgn0260938	tay
0.665651	4.50876	6.82046	0.000204246	0.00125755	0.382906	FBgn0038110	CG8031
0.664704	1.68707	4.18926	0.00371313	0.01038	-2.37188	FBgn0083949	CG34113
0.664252	5.00632	6.06183	0.000430646	0.00207779	-0.465385	FBgn0261383	IntS6
0.664215	2.9954	4.97068	0.00142433	0.00505115	-1.57556	FBgn0004865	Eip78C
0.66411	7.28418	7.24939	0.000137667	0.000963017	0.843134	FBgn0264693	ens
0.663344	6.31141	5.39749	0.000875594	0.003493	-1.23463	FBgn0034570	CG10543
0.662039	8.49856	5.33954	0.000934025	0.00367687	-1.22454	FBgn0086347	Myo31DF
0.661629	7.40978	7.03339	0.000167532	0.00109005	0.630139	FBgn0000721	for
0.660659	1.89149	4.73024	0.00189464	0.00622072	-1.6845	FBgn0031682	CG5828
0.660414	7.12376	6.75216	0.000217868	0.00132319	0.329631	FBgn0024320	Npc1a
0.660282	6.60099	5.82984	0.000548272	0.00247678	-0.708817	FBgn0036663	CG9674
0.660173	6.11235	4.42108	0.00276834	0.00829944	-2.50187	FBgn0027508	Tnks
0.660031	6.23294	6.26893	0.000349035	0.00179465	-0.222531	FBgn0000244	by
0.659968	4.55722	7.31829	0.000129435	0.000924976	0.884879	FBgn0085478	CG34449
0.65977	8.57053	6.37343	0.000314519	0.00166971	-0.0226158	FBgn0016694	Pdp1
0.659658	4.24826	6.37463	0.000314145	0.00166971	-0.0731597	FBgn0032243	Klp31E
0.658455	4.25357	6.30302	0.000337331	0.00175276	-0.15236	FBgn0035517	CG1265
0.657707	7.23443	5.10686	0.0012162	0.00448552	-1.56251	FBgn0030529	Clic
0.656845	6.47467	6.86892	0.000195159	0.00121583	0.428541	FBgn0050404	Tango11
0.656614	0.271072	3.26287	0.0129948	0.0281088	-3.39024	FBgn0262563	CG43103
0.656075	4.70083	7.37685	0.000122869	0.000895518	0.934222	FBgn0029175	Ext2
0.656038	0.0319217	2.9593	0.0200996	0.040021	-3.78692	FBgn0043806	CG32032
0.654683	3.57659	4.65934	0.00206423	0.00665256	-2.06801	FBgn0052499	Cda4
0.654585	4.58847	6.23143	0.000362434	0.00183896	-0.256587	FBgn0037138	P5CDh1
0.654133	3.23589	4.57643	0.00228402	0.00717469	-2.12935	FBgn0010435	emp
0.654034	6.20474	5.59248	0.000706825	0.00296946	-1.00224	FBgn0036910	Cyp305a1
0.653801	4.64688	5.64093	0.000670718	0.00285127	-0.939453	FBgn0034366	Atg7
0.653125	3.52883	5.70556	0.000625705	0.00270755	-0.752957	FBgn0263258	chas
0.653014	2.37362	4.74291	0.00186597	0.00615792	-1.76062	FBgn0032796	CG10188
0.652915	4.37539	5.42218	0.000851941	0.00342001	-1.18428	FBgn0036988	CG5262
0.652886	4.64409	4.351	0.00302272	0.00884843	-2.58956	FBgn0037979	GCC185
0.652632	3.88395	6.88389	0.000192445	0.0012048	0.504656	FBgn0000097	aop
0.651997	4.56446	6.60019	0.000251972	0.00144864	0.14685	FBgn0034543	CG30152
0.651851	6.39599	6.50978	0.000275072	0.00153218	0.0460233	FBgn0086254	CG6084
0.651689	3.21045	5.60283	0.000698935	0.00294323	-0.829311	FBgn0002945	nkd
0.651134	9.16939	6.21226	0.000369505	0.00186421	-0.176984	FBgn0002622	RpS3
0.650544	5.11075	6.69331	0.000230421	0.00137114	0.223731	FBgn0036518	RhoGAP71E
0.650455	1.39129	3.65955	0.00748511	0.0180175	-3.06301	FBgn0051344	CG31344
0.649953	2.98593	5.51544	0.000768765	0.00317448	-0.898666	FBgn0015571	alpha-Est3
0.649872	6.05962	7.1044	0.00015698	0.00105281	0.656857	FBgn0033048	CG7881
0.649612	7.29647	5.94722	0.000484816	0.0022746	-0.548103	FBgn0260462	CG12163
0.649563	2.01193	4.0884	0.00422973	0.0115564	-2.57744	FBgn0063923	Kaz1-ORFB
0.649479	5.24367	3.7951	0.0062312	0.015578	-3.3931	FBgn0038460	CG18622
0.648938	1.08195	3.63748	0.00771391	0.0184194	-3.02869	FBgn0050361	mtt
0.6484	7.95208	6.10876	0.000410439	0.00200949	-0.340825	FBgn0086357	Sec61alpha
0.647502	5.39991	5.86993	0.000525617	0.00241352	-0.690245	FBgn0011674	insc
0.647302	5.48434	6.26465	0.000350534	0.00179792	-0.242411	FBgn0263077	CG43340
0.646241	4.64294	5.8488	0.000537427	0.00245103	-0.695003	FBgn0031948	CG7149
0.646071	6.43989	4.70747	0.00194739	0.00634695	-2.10728	FBgn0040285	Scamp
0.646011	3.32253	3.34213	0.0116184	0.0256611	-3.8964	FBgn0037870	CG18577
0.645019	11.2632	5.01951	0.0013455	0.00484836	-1.53742	FBgn0032949	Lamp1
0.644649	5.29862	6.96196	0.000178953	0.00114193	0.501496	FBgn0266084	Fhos
0.64444	3.77259	6.53666	0.000267967	0.0015029	0.151399	FBgn0037473	CG10068
0.644041	1.51998	3.49663	0.00936346	0.0215136	-3.32825	FBgn0033791	Drl-2
0.643981	4.59746	7.09534	0.000158283	0.00105917	0.659393	FBgn0032435	Oatp33Eb
0.643923	5.95382	6.98321	0.000175467	0.00112611	0.53088	FBgn0263993	CG43736
0.643399	6.70773	6.41364	0.000302265	0.0016259	-0.0472788	FBgn0085442	NKAIN
0.642183	1.36702	2.95575	0.0202038	0.0402047	-4.10612	FBgn0259224	CG42324
0.642115	4.30715	6.14051	0.000397368	0.00196052	-0.337931	FBgn0052638	CG32638
0.642077	6.12	7.07727	0.00016092	0.00106802	0.630977	FBgn0035333	CG1317
0.641706	1.54541	3.87536	0.00559723	0.014306	-2.78449	FBgn0013810	Dhc36C
0.641706	6.70889	5.55548	0.000735856	0.0030655	-1.02921	FBgn0017558	Pdk
0.641103	8.55304	6.37398	0.000314346	0.00166971	-0.02272	FBgn0010348	Arf79F
0.640968	4.65282	7.17858	0.000146744	0.0010076	0.73996	FBgn0029895	CG14441
0.639845	6.18812	6.91828	0.000186367	0.00117664	0.470343	FBgn0022361	Pur-alpha
0.638789	1.87855	4.43575	0.00271808	0.00817619	-2.07349	FBgn0032129	jp
0.637909	3.8842	6.19963	0.000374248	0.00188024	-0.230177	FBgn0051454	CG31454
0.637644	4.7861	5.41587	0.000857916	0.0034409	-1.21792	FBgn0033713	CG8841
0.637614	7.04211	5.73588	0.00060575	0.00265721	-0.802682	FBgn0015591	AstA
0.637373	2.21931	4.73462	0.00188469	0.00620136	-1.74243	FBgn0035515	CG14997
0.63734	2.09925	2.84471	0.0237622	0.0457734	-4.428	FBgn0029723	Proc-R
0.63732	6.61993	5.04228	0.00131039	0.0047544	-1.66687	FBgn0036820	CG6852
0.637265	3.02357	5.07906	0.0012558	0.00459927	-1.44264	FBgn0037755	CG12945
0.636509	2.79965	4.12832	0.00401642	0.0110585	-2.67021	FBgn0028408	Drep-2
0.634027	5.90331	7.32052	0.000129177	0.000924976	0.869055	FBgn0032717	CG10600
0.633968	5.68227	6.18947	0.000378113	0.00189348	-0.324065	FBgn0001332	L
0.633312	5.66488	5.06375	0.00127821	0.00465847	-1.66652	FBgn0010905	Spn
0.633163	5.17186	6.74669	0.000219002	0.00132721	0.279058	FBgn0261285	Ppcs
0.63285	2.56962	4.41241	0.00279848	0.00837296	-2.23764	FBgn0034717	CG5819
0.632354	6.19792	6.21156	0.000369765	0.00186446	-0.287421	FBgn0003392	shi
0.632177	6.3626	7.11189	0.00015591	0.00104875	0.673317	FBgn0263930	dally
0.630852	5.62808	7.05791	0.0001638	0.00107771	0.601113	FBgn0053094	Synd
0.629624	5.0642	5.1501	0.00115733	0.00433713	-1.55651	FBgn0050049	CG30049
0.629555	5.10818	6.39271	0.000308575	0.00165064	-0.0995867	FBgn0050421	CG30421
0.629554	2.84535	4.81564	0.00171043	0.00578287	-1.75052	FBgn0032811	CG10268
[truncated: 3,237 more rows]
