# Supplementary material for: Age-related changes in polycomb gene regulation disrupt lineage fidelity in intestinal stem cells
Source: eLife. 2021 Mar 16;10:e62250. doi: 10.7554/eLife.62250 (PMC7984841; doi:10.7554/eLife.62250)
Supplement: Supplementary file 6. — Related to Figure 5. Significantly differentially regulated peak in promoter regions after Pc-RNAi in ISCs. [file elife-62250-supp6.xlsx]

## Sheet: Sheet1
seqnames	start	end	width	annotation_name	entrez_id	symbol	category	logFC	P.Value	adj.P.Val
2L	13842108	13842505	398	FBgn0053307	2768914	CG33307	promoter	1.51887	6.68513591556113e-8	3.78749e-05
2L	11527995	11528398	404	FBgn0028490	34577	CG31705	promoter	1.37614	5.72351872071223e-11	7.74059749567291e-8
X	8650416	8650813	398	FBgn0004102	31802	oc	promoter	1.27455	1.33214526030035e-9	1.21892e-06
2L	10337294	10337691	398	FBgn0019932	34396	SamDC	promoter	1.20594	5.36513470233033e-9	4.32564e-06
3R	13387392	13388143	752	FBgn0038146	41647	CG9799	promoter	1.14272	2.32591109103685e-7	0.000110811
3L	2479527	2480421	895	FBgn0035344	38311	Cyp4d20	promoter	1.0429	3.23408711374501e-7	0.000147379
2L	9902180	9902577	398	FBgn0053300	2768931	Muc30E	promoter	0.97156	0.000153463	0.0209574
2L	18822846	18823243	398	FBgn0032713	35138	CG17323	promoter	0.969053	3.35414e-06	0.00107345
2L	1651910	1652307	398	FBgn0086758	33343	chinmo	promoter	0.940123	9.12115e-05	0.0144327
3R	16972143	16972881	739	FBgn0000015	47763	Abd-B	promoter	0.921556	4.20231e-06	0.00127938
X	8807310	8807707	398	FBgn0026411	31813	Lim1	promoter	0.914043	1.19063e-05	0.00288992
2L	3322287	3323018	732	FBgn0053281	2768938	CG33281	promoter	0.903131	5.50371e-06	0.00155907
2R	8898910	8899307	398	FBgn0033340	35879	CG13751	promoter	0.841074	6.29938e-05	0.0110042
2L	19815861	19816504	644	FBgn0032824	35270	CG13962	promoter	0.823454	3.87417e-05	0.00762557
X	8806557	8806966	410	FBgn0026411	31813	Lim1	promoter	0.819319	0.000199166	0.0258127
2L	18821822	18822556	735	FBgn0032713	35138	CG17323	promoter	0.819243	0.000107041	0.0163785
2L	1648693	1649324	632	FBgn0086758	33343	chinmo	promoter	0.775265	6.44563e-05	0.0111362
2L	3323698	3324340	643	FBgn0053281	2768938	CG33281	promoter	0.759009	9.15171e-05	0.0144327
2L	21588622	21589517	896	FBgn0016919	35414	nompB	promoter	0.748971	0.000133401	0.0188947
3L	12297958	12298513	556	FBgn0036274	39405	CG4328	promoter	0.719834	0.00030062	0.0347204
2R	9391069	9391812	744	FBgn0010549	47905	l(2)03659	promoter	-0.662403	0.000339298	0.0381369
2R	15241407	15241813	407	FBgn0259878	2768836	Fs	promoter	-0.664719	0.00031005	0.035516
3L	4234988	4235385	398	FBgn0001257	38513	ImpL2	promoter	-0.668966	0.000308977	0.03549
2R	6759266	6759665	400	FBgn0033101	35586	CG9436	promoter	-0.671773	0.000267026	0.032233
3R	14417662	14418059	398	FBgn0085417	5740700	natalisin	promoter	-0.676368	0.000349491	0.0388658
2L	13641005	13641662	658	FBgn0028546	34774	ics	promoter	-0.725637	0.000228431	0.0286736
2L	18012132	18012532	401	FBgn0032660	35076	elfless	promoter	-0.733542	0.000113904	0.0171163
2R	16421265	16421709	445	FBgn0029153	3772692	Menl-2	promoter	-0.739632	6.9777e-05	0.0118437
2R	22066147	22066544	398	FBgn0265184	19834761	CG44249	promoter	-0.760974	5.12905e-05	0.00943139
3L	99602	99999	398	FBgn0040688	50161	CG12483	promoter	-0.777243	8.26179e-05	0.0134777
2R	8232279	8232699	421	FBgn0010109	35800	dpn	promoter	-0.797258	0.000128109	0.0183937
3L	1885385	1885788	404	FBgn0262624	38251	Tmhs	promoter	-0.799521	0.00010232	0.0158295
3L	1576424	1576826	403	FBgn0035237	38186	CG13917	promoter	-0.801635	0.000205864	0.0265564
3R	15135407	15136012	606	FBgn0038291	41821	CG3984	promoter	-0.802439	5.68671e-05	0.010321
2R	16652528	16652933	406	FBgn0020506	36863	Amyrel	promoter	-0.805325	5.76311e-05	0.0104146
2L	8071443	8071844	402	FBgn0010287	34102	Trf	promoter	-0.815859	0.000214614	0.0273486
2L	5886890	5887287	398	FBgn0031746	33815	CG9029	promoter	-0.82243	1.24918e-05	0.00300987
2R	7049028	7049443	416	FBgn0016032	35623	lbm	promoter	-0.830587	0.000362406	0.0398789
3L	20342623	20343020	398	FBgn0036970	40236	Spn77Bc	promoter	-0.832842	1.46678e-05	0.00335365
3L	1518939	1519336	398	FBgn0011204	38174	cue	promoter	-0.833443	1.50807e-05	0.00339924
2L	7085894	7086299	406	FBgn0031888	33994	Pvf2	promoter	-0.846903	1.52471e-05	0.00341837
2R	13840014	13840975	962	FBgn0033875	36532	CG6357	promoter	-0.854141	0.000279048	0.0330482
2L	17127451	17127849	399	FBgn0051784	318939	CG31784	promoter	-0.857322	9.65624e-06	0.00245356
3L	5080282	5080692	411	FBgn0005775	38590	Con	promoter	-0.861632	3.37696e-05	0.00677412
3L	19292428	19293177	750	FBgn0028380	43927	fal	promoter	-0.864805	0.000281632	0.033201
3R	4955225	4955622	398	FBgn0037288	40611	CG14661	promoter	-0.868259	4.41309e-06	0.00133107
3L	55189	55591	403	FBgn0262679	12798539	CG43149	promoter	-0.870276	4.0891e-06	0.00126056
3L	66031	66472	442	FBgn0002564	38015	Lsp1gamma	promoter	-0.880763	3.90364e-06	0.00122135
2R	21700320	21700717	398	FBgn0004362	37481	HmgD	promoter	-0.886158	0.00012427	0.0179755
3R	30474742	30475160	419	FBgn0260440	318559	spdo	promoter	-0.886215	0.000130702	0.018702
3L	4384208	4384605	398	FBgn0035539	38540	slow	promoter	-0.917041	1.60163e-06	0.000578867
2L	7158868	7159265	398	FBgn0085407	33995	Pvf3	promoter	-0.921692	1.07075e-05	0.00265629
3L	17254206	17254611	406	FBgn0036704	39924	CG6497	promoter	-0.936838	1.02191e-05	0.00256548
2R	13449805	13450202	398	FBgn0086757	36492	cbs	promoter	-0.941422	6.64352e-05	0.0113223
2R	9861919	9862340	422	FBgn0050010	246389	CG30010	promoter	-0.950608	8.6716e-05	0.0140386
3L	4383681	4384085	405	FBgn0035539	38540	slow	promoter	-0.997046	3.9739e-05	0.0077491
2R	11429924	11430321	398	FBgn0015872	36236	Drip	promoter	-0.997963	6.61620798720937e-7	0.000266716
3L	5952273	5952674	402	FBgn0053993	3885637	CG33993	promoter	-1.03768	8.55127226621986e-8	4.59631e-05
2R	10157902	10158321	420	FBgn0265512	36072	mlt	promoter	-1.08651	3.27562e-06	0.00106073
2R	25257305	25257855	551	FBgn0035094	38011	CG9380	promoter	-1.14011	6.50841361868038e-8	3.73788e-05
3L	1886815	1887440	626	FBgn0000109	48224	Aprt	promoter	-1.1517	2.10559e-06	0.00073564
2L	7459424	7460345	922	FBgn0045495	117496	Gr28b	promoter	-1.16671	4.0900055133369e-7	0.000174973
2L	15331633	15332030	398	FBgn0001981	34903	esg	promoter	-1.17668	9.36736025393335e-9	6.77115e-06
2L	19121570	19121971	402	FBgn0000422	35190	Ddc	promoter	-1.19615	4.47602379668159e-8	2.75967e-05
3L	5509276	5509989	714	FBgn0085371	5740152	CG34342	promoter	-1.21153	6.17422e-05	0.010893
2L	5518	6005	488	FBgn0031208	33155	CG11023	promoter	-1.26742	3.50923750084069e-10	3.67811955556865e-7
3L	20342054	20342451	398	FBgn0036970	40236	Spn77Bc	promoter	-1.32697	2.05161935455115e-10	2.26353003788308e-7
3L	10091698	10092095	398	FBgn0052053	39178	CG32053	promoter	-1.35825	1.29264124430219e-9	1.21892e-06
2R	16364611	16365016	406	FBgn0034122	36834	CG15711	promoter	-1.40942	2.54753054651518e-12	4.27220872650597e-9
3L	20341204	20341927	724	FBgn0036970	40236	Spn77Bc	promoter	-1.46506	1.26741467533941e-12	2.41528910289113e-9
2R	6173490	6173887	398	FBgn0033065	35543	Cyp6w1	promoter	-1.53474	9.19453652775095e-14	2.56987295950639e-10
3L	20340460	20340857	398	FBgn0036970	40236	Spn77Bc	promoter	-1.60789	4.97311131782011e-9	4.08819e-06
